# Supplementary material for: Improved GNSS integer ambiguity resolution method based on the column oriented Cholesky decomposition
Source: Research Square preprint supplement (doi:10.21203/rs.3.rs-2360038/v1), 2022-12-20
Supplement: Supplementary file 1 [file rinex302.pdf › supplement materials of the manuscript/Figure 5/rinex302.pdf]

# **RINEX**

## **The Receiver Independent Exchange Format**

**Version 3.02**

**International GNSS Service (IGS), RINEX Working  
Group and Radio Technical Commission for Maritime  
Services Special Committee 104 (RTCM-SC104),**

**April 3, 2013**

Acknowledgment: RINEX Version 3.02 is based on RINEX Version 3.01 which was developed  
by: Werner Gurtner, Astronomical Institute of the University of Bern, Switzerland and Lou  
Estey, UNAVCO, Boulder Colorado, USA.

## Table of Contents

|                                                                     |    |
|---------------------------------------------------------------------|----|
| 0. REVISION HISTORY.....                                            | 1  |
| 1. THE PHILOSOPHY AND HISTORY OF RINEX.....                         | 4  |
| 2. GENERAL FORMAT DESCRIPTION .....                                 | 6  |
| 3. BASIC DEFINITIONS .....                                          | 7  |
| 3.1 Time .....                                                      | 7  |
| 3.2 Pseudo-Range: .....                                             | 7  |
| 3.3 Phase .....                                                     | 7  |
| 3.4 Doppler .....                                                   | 8  |
| 3.5 Satellite numbers.....                                          | 8  |
| Figure 1: Satellite numbers and Constellation Identifiers.....      | 8  |
| 4. THE EXCHANGE OF RINEX FILES:.....                                | 9  |
| Figure 2: Recommended filename parameters.....                      | 9  |
| Table 1: Description of filename parameters .....                   | 10 |
| 5. RINEX VERSION 3 FEATURES .....                                   | 11 |
| 5.1 Observation codes .....                                         | 11 |
| Table 2 : RINEX Version 3.02 GPS observation codes.....             | 12 |
| Table 3 : RINEX Version 3.02 GLONASS observation codes.....         | 13 |
| Table 4 : RINEX Version 3.02 Galileo observation codes .....        | 13 |
| Table 5 : RINEX Version 3.02 SBAS observation codes .....           | 14 |
| Table 6 : RINEX Version 3.02 QZSS observation codes .....           | 14 |
| Table 7 : RINEX Version 3.02 BDS observation codes .....            | 15 |
| 5.2 Satellite system-dependent list of observables.....             | 15 |
| 5.3 Marker type.....                                                | 16 |
| Table 8: Proposed marker type keywords.....                         | 16 |
| 5.4 Half-wavelength observations, half-cycle ambiguities .....      | 17 |
| 5.5 Scale factor.....                                               | 17 |
| 5.6 Information about receivers on a vehicle .....                  | 17 |
| 5.7 Signal strengths.....                                           | 18 |
| Table 9: Standardized S/N indicators.....                           | 18 |
| 5.8 Date/time format in the PGM / RUN BY / DATE header record ..... | 18 |

|                                                                      |    |
|----------------------------------------------------------------------|----|
| 5.9 Antenna phase center header record .....                         | 19 |
| 5.10 Antenna orientation.....                                        | 19 |
| 5.11 Observation data records.....                                   | 19 |
| Table 10: Example for a list of observation types.....               | 19 |
| Table 11: Example for observation data records.....                  | 19 |
| 5.12 Ionosphere delay as pseudo-observables .....                    | 20 |
| 5.13 Channel numbers as pseudo-observables.....                      | 20 |
| 5.14 Corrections of differential code biases (DCBs) .....            | 21 |
| 5.15 Corrections of antenna phase center variations (PCVs).....      | 21 |
| 5.16 Navigation message files .....                                  | 22 |
| 6. ADDITIONAL HINTS AND TIPS .....                                   | 23 |
| 6.1 Versions .....                                                   | 23 |
| 6.2 Leading blanks in CHARACTER fields.....                          | 23 |
| 6.3 Variable-length records.....                                     | 23 |
| 6.4 Blank fields .....                                               | 23 |
| 6.5 Order of the header records, order of data records.....          | 23 |
| 6.6 Missing items, duration of the validity of values.....           | 24 |
| 6.7 Unknown / Undefined observation types and header records.....    | 24 |
| 6.8 Event flag records .....                                         | 24 |
| 6.9 Receiver clock offset.....                                       | 25 |
| 6.10 Two-digit years .....                                           | 25 |
| 6.11 Fit interval (GPS navigation message file) .....                | 25 |
| 6.12 Satellite health (GPS navigation message file) .....            | 26 |
| 6.13 Transmission time of message (GPS navigation message file)..... | 26 |
| 6.14 Antenna references, phase centers .....                         | 26 |
| 7. RINEX UNDER ANTISPOOFING (AS).....                                | 27 |
| 8. DEALING WITH DIFFERENT SATELLITE SYSTEMS.....                     | 28 |
| 8.1 Time system identifier .....                                     | 28 |
| Table 12: Relations between GPS, QZSS, GST, GAL and BDS weeks.....   | 29 |
| 8.2 Pseudorange definition.....                                      | 31 |
| 8.3 RINEX navigation message files .....                             | 31 |
| 8.3.1 RINEX navigation message files for GLONASS .....               | 32 |

|                                                                          |    |
|--------------------------------------------------------------------------|----|
| 8.3.2 RINEX navigation message files for Galileo.....                    | 32 |
| 8.3.3 RINEX navigation message files for GEO satellites .....            | 33 |
| 8.3.4 RINEX navigation message files for QZSS L1-SAIF .....              | 34 |
| 8.3.5 RINEX navigation message files for BDS.....                        | 34 |
| 8.4 RINEX observation files for GEO satellites .....                     | 35 |
| 9. MODIFICATIONS FOR VERSION 3.01 and 3.02 .....                         | 36 |
| 9.1 Phase Cycle Shifts.....                                              | 36 |
| 9.2 Galileo: BOC-Tracking of an MBOC-Modulated Signal .....              | 37 |
| 9.3 BDS Satellite System Code.....                                       | 38 |
| 9.4 New Observation Codes for GPS L1C and BDS .....                      | 38 |
| 9.5 Header Records for GLONASS Slot and Frequency Numbers .....          | 38 |
| 9.6 GNSS Navigation Message File: Leap Seconds Record.....               | 38 |
| 9.7 Clarifications in the Galileo Navigation Message File: .....         | 38 |
| 9.8 RINEX Meteorological Data Files.....                                 | 38 |
| 9.9 Added Quasi-Zenith Satellite System (QZSS) Version 3.02 .....        | 38 |
| 9.10 Added GLONASS Mandatory Code-Phase Alignment Header Record .....    | 39 |
| 9.11 Added BDS system (Replaces Compass) .....                           | 39 |
| 10. REFERENCES .....                                                     | 40 |
| APPENDIX: RINEX FORMAT DEFINITIONS AND EXAMPLES .....                    | 1  |
| A 1 RINEX File name description.....                                     | 1  |
| A 2 GNSS Observation Data File -Header Section Description.....          | 5  |
| A 3 GNSS Observation Data File -Data Record Description .....            | 12 |
| A 4 GNSS Observation Data File - Example.....                            | 14 |
| A 5 GNSS Navigation Message File – Header Section Description.....       | 16 |
| A 6 GNSS Navigation Message File – GPS Data Record Description.....      | 18 |
| A 7 GPS Navigation Message File – Example .....                          | 19 |
| A 8 GNSS Navigation Message File – GALILEO Data Record Description.....  | 20 |
| A 9 GALILEO Navigation Message File – Example .....                      | 22 |
| A 10 GNSS Navigation Message File – GLONASS Data Record Description..... | 23 |
| A 11 GNSS Navigation Message File – Example: Mixed GPS / GLONASS .....   | 24 |
| A 12 GNSS Navigation Message File – QZSS Data Record Description .....   | 25 |
| A 13 GNSS Navigation Message File – BDS Data Record Description .....    | 27 |

|                                                                                  |    |
|----------------------------------------------------------------------------------|----|
| A 14 GNSS Navigation Message File – SBAS Data Record Description.....            | 29 |
| A 15 SBAS Navigation Message File -Example .....                                 | 30 |
| A 16 Meteorological Data File -Header Section Description .....                  | 31 |
| A 17 Meteorological Data File -Data Record Description.....                      | 33 |
| A 18 Meteorological Data File – Example .....                                    | 33 |
| A 19 Reference Code and Phase Alignment by Constellation and Frequency Band..... | 34 |

## 0. REVISION HISTORY

### Version 3.00

|             |                                                                                                                                                                                                                                                                                                                                                                                                                                                                                   |
|-------------|-----------------------------------------------------------------------------------------------------------------------------------------------------------------------------------------------------------------------------------------------------------------------------------------------------------------------------------------------------------------------------------------------------------------------------------------------------------------------------------|
| 02 Feb 2006 | A few typos and obsolete paragraphs removed.                                                                                                                                                                                                                                                                                                                                                                                                                                      |
| 08 Mar 2006 | Epochs of met data of met files version 2.11 are in GPS time only (Table A15).                                                                                                                                                                                                                                                                                                                                                                                                    |
| 31 Mar 2006 | DCB header record label corrected in Table A6:<br><b>SYS / DCBS APPLIED.</b>                                                                                                                                                                                                                                                                                                                                                                                                      |
| June 2006   | Filenames for mixed GNSS nav mess files.                                                                                                                                                                                                                                                                                                                                                                                                                                          |
| 10 Aug 2006 | Table A3: Error in format of <b>EPOCH</b> record:<br>One 6X removed. Trailing 3X removed.                                                                                                                                                                                                                                                                                                                                                                                         |
| 12 Sep 2006 | GNSS navigation message files version 3.00 included (including Galileo).<br>Table A4: Example of the kinematic event was wrong (kinematic event record).<br><b>SYS / DCBS APPLIED</b> header record simplified.<br>Tables A6 and A8: Clarification for adjustment of "Transmission time of message".                                                                                                                                                                              |
| 03 Oct 2006 | Table A11: Mixed GPS/GLONASS navigation message file                                                                                                                                                                                                                                                                                                                                                                                                                              |
| 26 Oct 2006 | Table A4: Removed obsolete antispoofting flag<br>Tables A6/8/10: Format error in <b>SV / EPOCH / SV CLK</b> :<br>Space between svn and year was missing<br>Half-cycle ambiguity flag (re-)introduced (5.4 and Table A4).<br>Clarification of reported GLONASS time (8.1).<br>New header record <b>SYS / PCVS APPLIED</b><br>New Table 10: Relations between <b>GPS</b> , <b>GST</b> , and <b>GAL</b> weeks<br>Recommendation to avoid storing redundant navigation messages (8.3) |
| 14 Nov 2006 | Tables A6/10/12: Format error in<br><b>BROADCAST ORBIT - n</b> : 3X → 4X. Examples were OK.                                                                                                                                                                                                                                                                                                                                                                                       |
| 21 Nov 2006 | Marker type <b>NON_PHYSICAL</b> added                                                                                                                                                                                                                                                                                                                                                                                                                                             |
| 19-Dec-2006 | Table A4: Example of <b>SYS / DCBS APPLIED</b> was wrong.                                                                                                                                                                                                                                                                                                                                                                                                                         |
| 13-Mar-2007 | Paragraph 3.3: Leftover from RINEX version 2 regarding wavelength factor for squaring- type receiver removed and clarified.                                                                                                                                                                                                                                                                                                                                                       |
| 14-Jun-2007 | Paragraph 5.11: Clarification regarding the observation record length                                                                                                                                                                                                                                                                                                                                                                                                             |
| 28-Nov-2007 | Frequency numbers for GLONASS -7..+12 ( <b>BROADCAST ORBIT -</b><br><b>Version 3.01</b>                                                                                                                                                                                                                                                                                                                                                                                           |
| 22-Jun-2009 | Phase cycle shifts<br><br>Galileo: BOC-tracking of an MBOC-modulated signal<br>Compass satellite system: Identifier and observation codes<br>Code for GPS L1C<br>Header records for GLONASS slot and frequency numbers<br>Order of data records                                                                                                                                                                                                                                   |

Galileo nav mess record **BROADCAST ORBIT - 5:**

Bits  $\frac{3}{4}$  reserved for Galileo internal use

**Version 3.02 – IGS and RTCM-SC104**

- 19-Nov-2011 Added Quasi Zenith Satellite System (QZSS) Constellation  
Updated text, tables and graphics  
Added Appendix Table 19 phase alignment table
- 21-Jan-2012 Split the Constellation table into a table for each GNSS  
Added QZSS to the documentation  
Edited text to improve clarity  
Corrected sign in the phase alignment table, removed QZSS P signals  
Removed
- 9-May-2012 Edited text to improve clarity,  
Updated phase alignment table,  
Changed Met PGM / RUN BY / DATE to support 4digit year as in all other records also changed format to support 4 digit year for met. Observation record,  
Changed SYS / PHASE SHIFTS to SHIFT
- 29-Nov-2012 Changed Table 1 and 2 to Figure 1 and 2. Updated all Table numbers  
Changed file naming convention, Section 4. Added Appendix Table A1 and increased all updated all Appendix numbers  
Removed the option of supporting unknown tracking mode from Section 5.1.  
Harmonized L1C(new) signal identifiers for QZSS and GPS See : Table 2 and 6.  
Updated BeiDou System (BDS) (was Compass) information through out document added new BDS ephemeris definition to Appendix. (Based on input from the BDS Office)  
Corrected GLONASS SLOT/FRQ format in section 9.5, changed message status from optional to mandatory (See: Appendix Table A2).  
Added new mandatory GLONASS Code Phase Bias header record  
See section 9.10
- 11-Mar-2013 Updated Sections: 4.x, made .rnx the file name extension and updated Figure 2; 9.1 to clarify the use of the phase alignment header; A1 Edited to reflect file extension of \*.rnx; A13 - BDS ephemeris changed AODC to IODC and AODE to IODE (as indicated by BDS Authority and new ICD); Appendix Table 19 (Changed GLONASS Reference Signals to C1-C2) and explicitly identified reference signal for all constellations and frequencies.
- 26-Mar-2013 Changed BeiDou to BDS for conform to ICD.  
In table 7 changed BDS signals from : C2x, C1x to more closely reflect existing bands in tables 2-6 and Appendix Tables A2 and A19.  
Updated Section 8.1: First paragraph updated to indicate current number of leap seconds; added a row to Table 12 to show the relationship between GPS week and BDT week. Added a table to show the approximate relationship of BDT to GPS time.

Changed order of file type: from OG to GO etc in Appendix Table 1.  
Updated Appendix table A19 to show X signals and indicate that the X phase is to be aligned to the frequencies reference signal.  
Fixed a few small typos in A19 for GPS: L1C-D/P and D+P.



## 1. THE PHILOSOPHY AND HISTORY OF RINEX

The first proposal for the *Receiver Independent Exchange Format RINEX* was developed by the Astronomical Institute of the University of Berne for the easy exchange of the Global Positioning System (GPS) data to be collected during the first large European GPS campaign EUREF 89, which involved more than 60 GPS receivers of 4 different manufacturers. The governing aspect during the development was the following fact:

Most geodetic processing software for GPS data use a well-defined set of observables:

- the carrier-phase measurement at one or both carriers (actually being a measurement on the beat frequency between the received carrier of the satellite signal and a receiver-generated reference frequency).
- the pseudorange (code) measurement, equivalent to the difference of the time of reception (expressed in the time frame of the receiver) and the time of transmission (expressed in the time frame of the satellite) of a distinct satellite signal.
- the observation time being the reading of the receiver clock at the instant of validity of the carrier-phase and/or the code measurements.

Usually the software assumes that the observation time is valid for both the phase **and** the code measurements, **and** for all satellites observed.

Consequently all these programs do not need most of the information that is usually stored by the receivers: They need phase, code, and time in the above mentioned definitions, and some station-related information like station name, antenna height, etc.

Up till now two major format versions have been developed and published:

- The original RINEX Version 1 presented at and accepted by the 5<sup>th</sup> International Geodetic Symposium on Satellite Positioning in Las Cruces, 1989. [Gurtner et al. 1989], [Evans 1989]
- RINEX Version 2 presented at and accepted by the Second International Symposium of Precise Positioning with the Global Positioning system in Ottawa, 1990, mainly adding the possibility to include tracking data from different satellite systems (GLONASS, SBAS). [Gurtner and Mader 1990a, 1990b], [Gurtner 1994].

Several subversions of RINEX Version 2 have been defined:

- Version 2.10: Among other minor changes allowing for sampling rates other than integer seconds and including raw signal strengths as new observables. [Gurtner 2002]
- Version 2.11: Includes the definition of a two-character observation code for L2C pseudoranges and some modifications in the GEO NAV MESS files [Gurtner and Estey 2005]

- Version 2.20: Unofficial version used for the exchange of tracking data from spaceborne receivers within the IGS LEO pilot project [Gurtner and Estey 2002]

As spin-offs of this idea of a receiver-independent GPS exchange format other RINEX-like exchange file formats have been defined, mainly used by the International GNSS Service IGS:

- Exchange format for **satellite and receiver clock offsets** determined by processing data of a GNSS tracking network [Ray and Gurtner 1999]
- Exchange format for the complete **broadcast data of space-based augmentation systems SBAS**. [Suard et al. 2004]
- IONEX: Exchange format for **ionosphere models** determined by processing data of a GNSS tracking network [Schaer et al. 1998]
- ANTEX: Exchange format for **phase center variations** of geodetic GNSS antennae [Rothacher and Schmid 2005]

The upcoming European Navigation Satellite System Galileo and the enhanced GPS with new frequencies and observation types, especially the possibility to track frequencies on different channels, ask for a more flexible and more detailed definition of the observation codes.

To improve the handling of the data files in case of “mixed” files, i.e. files containing tracking data of more than one satellite system, each one with different observation types, the record structure of the data record has been modified significantly and, following several requests, the limitation to 80 characters length has been removed.

As the changes are quite significant, they lead to a new RINEX Version 3. The new version also includes the unofficial Version 2.20 definitions for space-borne receivers.

The major change asking for a version 3.01 was the requirement to generate consistent phase observations across different tracking modes or channels, i.e. to apply  $\frac{1}{4}$ -cycle shifts prior to RINEX file generation, if necessary, to facilitate the processing of such data.

## 2. GENERAL FORMAT DESCRIPTION

The RINEX version 3.00 format consists of three ASCII file types:

1. Observation data File
2. Navigation message File
3. Meteorological data File

Each file type consists of a header section and a data section. The header section contains global information for the entire file and is placed at the beginning of the file. The header section contains **header labels in columns 61-80** for each line contained in the header section. These labels are mandatory and must appear exactly as given in these descriptions and examples.

The format has been optimized for minimum space requirements independent from the number of different observation types of a specific receiver or satellite system by indicating in the header the types of observations to be stored for this receiver and the satellite systems having been observed. In computer systems allowing variable record lengths the observation records may be kept as short as possible. Trailing blanks can be removed from the records. There is no maximum record length limitation for the observation records.

Each Observation file and each Meteorological Data file basically contain the data from one site and one session. Starting with Version 2 RINEX also allows including observation data from more than one site subsequently occupied by a roving receiver in rapid static or kinematic applications. Although Version 2 and higher allow to insert header records into the data section it is not recommended to concatenate data of more than one receiver (or antenna) into the same file, even if the data do not overlap in time.

If data from more than one receiver have to be exchanged, it would not be economical to include the identical satellite navigation messages collected by the different receivers several times. Therefore the navigation message file from one receiver may be exchanged or a composite navigation message file created containing non-redundant information from several receivers in order to make the most complete file.

The format of the data records of the RINEX Version 1 navigation message file was identical to the former NGS exchange format. RINEX version 3 navigation message files may contain navigation messages of more than one satellite system (GPS, GLONASS, Galileo, Quasi Zenith Satellite System (QZSS), BeiDou System (BDS) and SBAS).

The actual format descriptions as well as examples are given in the Appendix Tables at the end of the document.

### 3. BASIC DEFINITIONS

GPS observables include three fundamental quantities that need to be defined: Time, Phase, and Range.

#### 3.1 Time

The time of the measurement is the receiver time of the received signals. It is identical for the phase and range measurements and is identical for all satellites observed at that epoch. For single-system data files it is by default expressed in the time system of the respective satellite system. Otherwise the actual time can (for mixed files must) be indicated in the Start Time header record.

#### 3.2 Pseudo-Range:

The pseudo-range (PR) is the distance from the receiver antenna to the satellite antenna including receiver and satellite clock offsets (and other biases, such as atmospheric delays):

$$\text{PR} = \text{distance} + c * (\text{receiver clock offset} - \text{satellite clock offset} + \text{other biases})$$

so that the pseudo-range reflects the actual behaviour of the receiver and satellite clocks. The pseudo-range is stored in units of meters.

See also clarifications for pseudoranges in mixed GPS/GLONASS/Galileo/QZSS/BDS files in chapter 8.1.

#### 3.3 Phase

The phase is the carrier-phase measured in whole cycles. The half-cycles measured by squaring-type receivers must be converted to whole cycles and flagged by the respective observation code (see Table 2 and paragraph 5.4, GPS only).

The phase changes in the same sense as the range (negative doppler). The phase observations between epochs must be connected by including the integer number of cycles.

The observables are not corrected for external effects like atmospheric refraction, satellite clock offsets, etc.

If necessary phase observations are corrected for phase shifts needed to guarantee consistency between phases of the same frequency and satellite system based on different signal channels (See Section 9.1 and Appendix A19).

If the receiver or the converter software adjusts the measurements using the real-time-derived receiver clock offsets  $dT(r)$ , the consistency of the 3 quantities phase / pseudo-range / epoch must be maintained, i.e. the receiver clock correction should be applied to all 3 observables:

|              |   |           |   |            |
|--------------|---|-----------|---|------------|
| Time (corr)  | = | Time(r)   | - | dT(r)      |
| PR (corr)    | = | PR (r)    | - | dT(r)*c    |
| phase (corr) | = | phase (r) | - | dT(r)*freq |

### 3.4 Doppler

The sign of the doppler shift as additional observable is defined as usual: Positive for approaching satellites.

### 3.5 Satellite numbers

Starting with RINEX Version 2 the former two-digit satellite numbers **nn** are preceded by a one-character system identifier **s**;, see Figure 1.

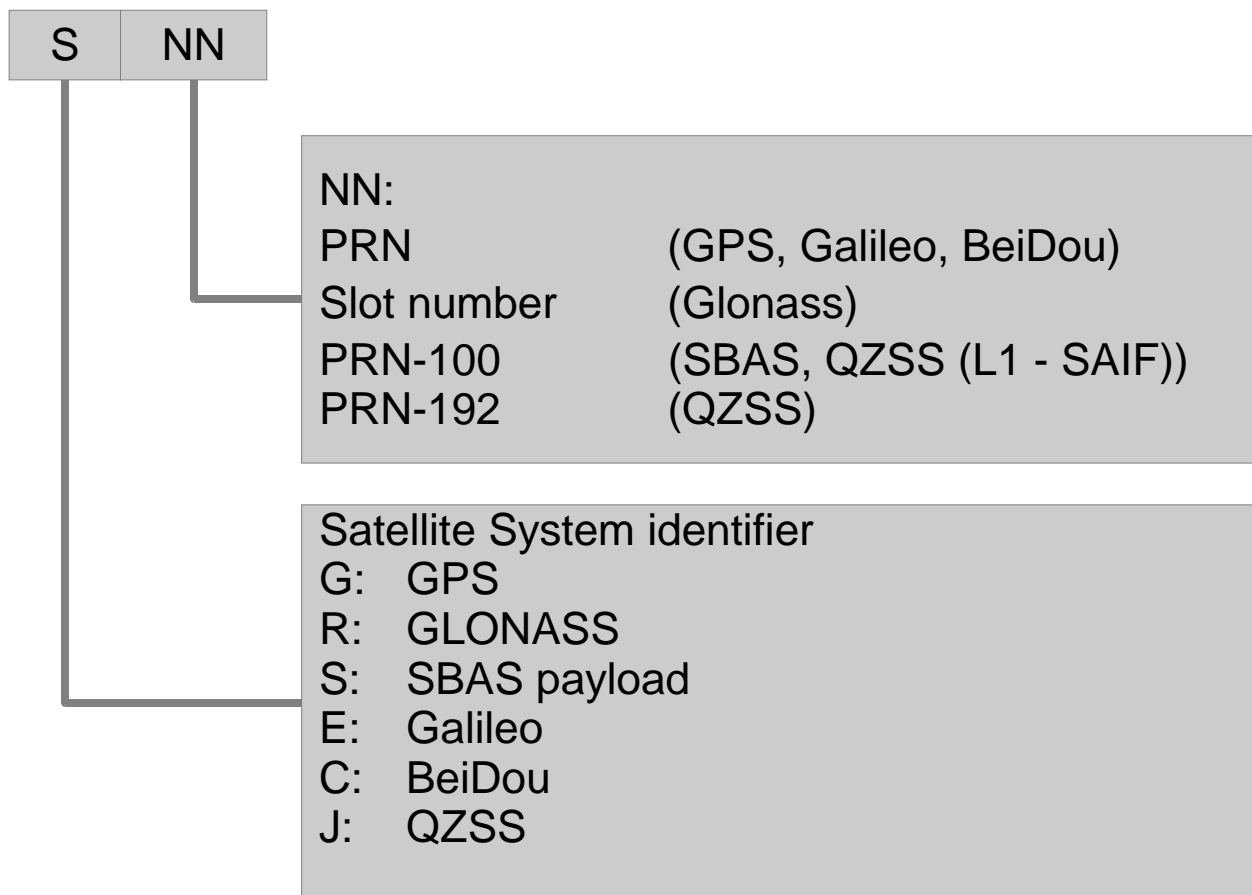

Figure 1: Satellite numbers and Constellation Identifiers

The same satellite system identifiers are also used in all header records when appropriate.

#### 4. THE EXCHANGE OF RINEX FILES:

The original RINEX file naming convention was implemented in the MS-DOS era when file names were restricted to 8.3 characters. Modern operating systems typically support 255 character file names. The goal of the new file naming convention is to be more: descriptive, flexible and extensible than the RINEX 2.11 file naming convention. Figure 2 below lists the elements of the RINEX 3.02 file naming convention.

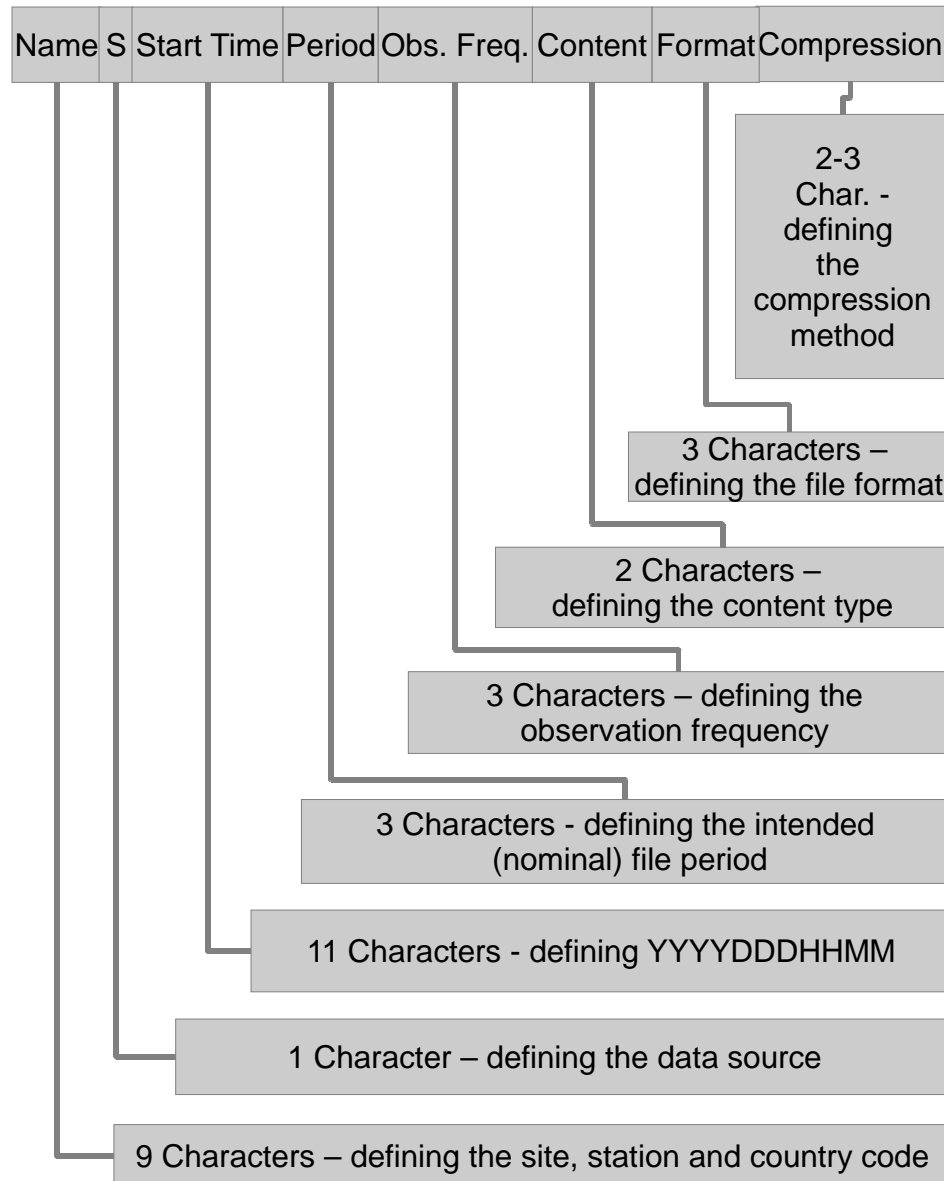

**Figure 2: Recommended filename parameters.**

All elements are fixed length and are separated by an underscore “\_” except for the: file type and compression fields that uses a period “.” separator. Fields must be padded with zeros to fill the field width. The file compression field is optional. See Appendix A1 for a detailed description of the RINEX 3.02 file naming convention. Table 1 below lists sample file names for GNSS observation and navigation files.

| File Name                              | Comments                                                                                          |
|----------------------------------------|---------------------------------------------------------------------------------------------------|
| ALGO00CAN_R_20121601000_01H_01S_MO.rnx | Mixed RINEX GNSS observation file containing 1 hour of data, with an observation every second.    |
| ALGO00CAN_R_20121601000_15M_01S_GO.rnx | GPS RINEX observation file containing 15 minutes of data, with an observation every second.       |
| ALGO00CAN_R_20121601000_01H_05Z_MO.rnx | Mixed RINEX GNSS observation file containing 1 hour of data, with 5 observations per second.      |
| ALGO00CAN_R_20121601000_01D_30S_GO.rnx | GPS RINEX observation file containing 1 day of data, with an observation every 30 seconds.        |
| ALGO00CAN_R_20121601000_01D_30S_MO.rnx | Mixed RINEX GNSS observation file containing 1 day of data, with an observation every 30 seconds. |
| ALGO00CAN_R_20121600000_01D_GN.rnx     | RINEX GPS navigation file, containing one days data.                                              |
| ALGO00CAN_R_20121600000_15M_RN.rnx     | RINEX GLONASS navigation file, containing one days data                                           |

**Table 1: Description of filename parameters**

In order to further reduce the size of observation files Yuki Hatanaka developed a compression scheme that takes advantage of the structure of the RINEX observation data by forming higher-order differences in time between observations of the same type and satellite. This compressed file is also an ASCII file that is subsequently compressed again using the above mentioned standard compression programs.

References for the Hatanaka compression scheme: See e.g.

- <http://terras.gsi.go.jp/ja/crx2rnx.html>
- IGSMails 1525,1686,1726,1763,1785,4967,4969,4975

The file naming and compression recommendations are strictly speaking not part of the RINEX format definition. However, they significantly facilitate the exchange of RINEX data in large user communities like IGS.

## 5. RINEX VERSION 3 FEATURES

The following section contains features that have been introduced for RINEX Version 3:

### 5.1 Observation codes

The new signal structures for GPS, Galileo and BDS make it possible to generate code and phase observations based on one or a combination of several channels: Two-channel signals are composed of I and Q components, three-channel signals of A, B, and C components. Moreover a wideband tracking of a combined E5a + E5b frequency tracking is possible. In order to keep the observation codes short but still allow for a detailed characterization of the actual signal generation the length of the codes is increased from two (Version 1 and 2) to three by adding a signal generation attribute:

The observation code **tna** consists of three parts:

|                             |                                                           |                           |                     |                             |
|-----------------------------|-----------------------------------------------------------|---------------------------|---------------------|-----------------------------|
| <b>t</b> : observation type | <b>C</b> = pseudorange,                                   | <b>L</b> = carrier phase, | <b>D</b> = doppler, | <b>S</b> = signal strength) |
| <b>n</b> : band / frequency | <b>1, 2, ..., 8</b>                                       |                           |                     |                             |
| <b>a</b> : attribute        | tracking mode or channel, e.g., <b>I</b> , <b>Q</b> , etc |                           |                     |                             |

Examples:

- **L1C**: C/A code-derived L1 carrier phase (GPS, GLONASS) Carrier phase on E2-L1-E1 derived from C channel (Galileo)
- **C2L**: L2C pseudorange derived from the L channel (GPS)

Tables 2 to 7 describe each GNSS constellation and the frequencies and signal encoding methods used.



| GNSS System | Freq. Band /Frequency | Channel or Code                 | Observation Codes |               |         |                 |
|-------------|-----------------------|---------------------------------|-------------------|---------------|---------|-----------------|
|             |                       |                                 | Pseudo Range      | Carrier Phase | Doppler | Signal Strength |
| GPS         | L1/1575.42            | C/A                             | C1C               | L1C           | D1C     | S1C             |
|             |                       | L1C (D)                         | C1S               | L1S           | D1S     | S1S             |
|             |                       | L1C (P)                         | C1L               | L1L           | D1L     | S1L             |
|             |                       | L1C (D+P)                       | C1X               | L1X           | D1X     | S1X             |
|             |                       | P                               | C1P               | L1P           | D1P     | S1P             |
|             |                       | Z-tracking and similar (AS on)  | C1W               | L1W           | D1W     | S1W             |
|             |                       | Y                               | C1Y               | L1Y           | D1Y     | S1Y             |
|             |                       | M                               | C1M               | L1M           | D1M     | S1M             |
|             |                       | codeless                        |                   | L1N           | D1N     | S1N             |
|             | L2/1227.60            | C/A                             | C2C               | L2C           | D2C     | S2C             |
|             |                       | L1(C/A)+(P2-P1) (semi-codeless) | C2D               | L2D           | D2D     | S2D             |
|             |                       | L2C (M)                         | C2S               | L2S           | D2S     | S2S             |
|             |                       | L2C (L)                         | C2L               | L2L           | D2L     | S2L             |
|             |                       | L2C (M+L)                       | C2X               | L2X           | D2X     | S2X             |
|             |                       | P                               | C2P               | L2P           | D2P     | S2P             |
|             |                       | Z-tracking and similar (AS on)  | C2W               | L2W           | D2W     | S2W             |
|             |                       | Y                               | C2Y               | L2Y           | D2Y     | S2Y             |
|             |                       | M                               | C2M               | L2M           | D2M     | S2M             |
|             |                       | codeless                        |                   | L2N           | D2N     | S2N             |
|             | L5/1176.45            | I                               | C5I               | L5I           | D5I     | S5I             |
|             |                       | Q                               | C5Q               | L5Q           | D5Q     | S5Q             |
|             |                       | I+Q                             | C5X               | L5X           | D5X     | S5X             |

Table 2 : RINEX Version 3.02 GPS observation codes

| GNSS System | Freq. Band /Frequency              | Channel or Code    | Observation Codes |               |         |                 |
|-------------|------------------------------------|--------------------|-------------------|---------------|---------|-----------------|
|             |                                    |                    | Pseudo Range      | Carrier Phase | Doppler | Signal Strength |
| GLONASS     | G1/<br>1602+k*9/16<br>k= -7....+12 | C/A                | C1C               | L1C           | D1C     | S1C             |
|             |                                    | P                  | C1P               | L1P           | D1P     | S1P             |
|             | G2/<br>1246+k*716                  | C/A<br>(GLONASS M) | C2C               | L2C           | D2C     | S2C             |
|             |                                    | P                  | C2P               | L2P           | D2P     | S2P             |
|             | G3 / 1202.025                      | I                  | C3I               | L3I           | D3I     | S3I             |
|             |                                    | Q                  | C3Q               | L3Q           | D3Q     | S3Q             |
|             |                                    | I+Q                | C3X               | L3X           | D3X     | S3X             |
|             |                                    |                    |                   |               |         |                 |

Table 3 : RINEX Version 3.02 GLONASS observation codes

| GNSS System | Freq. Band /Frequency     | Channel or Code   | Observation Codes |               |         |                 |
|-------------|---------------------------|-------------------|-------------------|---------------|---------|-----------------|
|             |                           |                   | Pseudo Range      | Carrier Phase | Doppler | Signal Strength |
| Galileo     | E1 / 1575.42              | A PRS             | C1A               | L1A           | D1A     | S1A             |
|             |                           | B I/NAV OS/CS/SoL | C1B               | L1B           | D1B     | S1B             |
|             |                           | C no data         | C1C               | L1C           | D1C     | S1C             |
|             |                           | B+C               | C1X               | L1X           | D1X     | S1X             |
|             |                           | A+B+C             | C1Z               | L1Z           | D1Z     | S1Z             |
|             | E5a / 1176.45             | I F/NAV OS        | C5I               | L5I           | D5I     | S5I             |
|             |                           | Q no data         | C5Q               | L5Q           | D5Q     | S5Q             |
|             |                           | I+Q               | C5X               | L5X           | D5X     | S5X             |
|             | E5b / 1207.140            | I I/NAV OS/CS/SoL | C7I               | L7I           | D7I     | S7I             |
|             |                           | Q no data         | C7Q               | L7Q           | D7Q     | S7Q             |
|             |                           | I+Q               | C7X               | L7X           | D7X     | S7X             |
|             | E5(E5a+E5b) /<br>1191.795 | I                 | C8I               | L8I           | D8I     | S8I             |
|             |                           | Q                 | C8Q               | L8Q           | D8Q     | S8Q             |
|             |                           | I+Q               | C8X               | L8X           | D8X     | S8X             |
|             | E6 / 1278.75              | A PRS             | C6A               | L6A           | D6A     | S6A             |
|             |                           | B C/NAV CS        | C6B               | L6B           | D6B     | S6B             |
|             |                           | C no data         | C6C               | L6C           | D6C     | S6C             |
|             |                           | B+C               | C6X               | L6X           | D6X     | S6X             |
|             |                           | A+B+C             | C6Z               | L6Z           | D6Z     | S6Z             |

Table 4 : RINEX Version 3.02 Galileo observation codes

| GNSS System | Freq. Band/<br>Frequency | Channel or Code | Observation Codes |               |         |                 |
|-------------|--------------------------|-----------------|-------------------|---------------|---------|-----------------|
|             |                          |                 | Pseudo Range      | Carrier Phase | Doppler | Signal Strength |
| SBAS        | L1 / 1575.42             | C/A             | C1C               | L1C           | D1C     | S1C             |
|             | L5 / 1176.45             | I               | C5I               | L5I           | D5I     | S5I             |
|             |                          | Q               | C5Q               | L5Q           | D5Q     | S5Q             |
|             |                          | I+Q             | C5X               | L5X           | D5X     | S5X             |

Table 5 : RINEX Version 3.02 SBAS observation codes

| GNSS System | Freq. Band /<br>Frequency | Channel or Code | Observation Codes |               |         |                 |
|-------------|---------------------------|-----------------|-------------------|---------------|---------|-----------------|
|             |                           |                 | Pseudo Range      | Carrier Phase | Doppler | Signal Strength |
| QZSS        | L1 / 1575.42              | C/A             | C1C               | L1C           | D1C     | S1C             |
|             |                           | L1C (D)         | C1S               | L1S           | D1S     | S1S             |
|             |                           | L1C (P)         | C1L               | L1L           | D1L     | S1L             |
|             |                           | L1C (D+P)       | C1X               | L1X           | D1X     | S1X             |
|             |                           | L1-SAIF         | C1Z               | L1Z           | D1Z     | S1Z             |
|             | L2 / 1227.60              | L2C (M)         | C2S               | L2S           | D2S     | S2S             |
|             |                           | L2C (L)         | C2L               | L2L           | D2L     | S2L             |
|             |                           | L2C (M+L)       | C2X               | L2X           | D2X     | S2X             |
|             | L5 / 1176.45              | I               | C5I               | L5I           | D5I     | S5I             |
|             |                           | Q               | C5Q               | L5Q           | D5Q     | S5Q             |
|             |                           | I+Q             | C5X               | L5X           | D5X     | S5X             |
|             | LEX(6) / 1278.75          | S               | C6S               | L6S           | D6S     | S6S             |
|             |                           | L               | C6L               | L6L           | D6L     | S6L             |
|             |                           | S+L             | C6X               | L6X           | D6X     | S6X             |

Table 6 : RINEX Version 3.02 QZSS observation codes

| GNSS System | Freq. Band / Frequency | Channel or Code | Observation Codes |               |         |                 |
|-------------|------------------------|-----------------|-------------------|---------------|---------|-----------------|
|             |                        |                 | Pseudo Range      | Carrier Phase | Doppler | Signal Strength |
| BDS         | B1 / 1561.098          | I               | C1I               | L1I           | D1I     | S1I             |
|             |                        | Q               | C1Q               | L1Q           | D1Q     | S1Q             |
|             |                        | I+Q             | C1X               | L1X           | D1X     | S1X             |
|             | B2 / 1207.14           | I               | C7I               | L7I           | D7I     | S7I             |
|             |                        | Q               | C7Q               | L7Q           | D7Q     | S7Q             |
|             |                        | I+Q             | C7X               | L7X           | D7X     | S7X             |
|             | B3 / 1268.52           | I               | C6I               | L6I           | D6I     | S6I             |
|             |                        | Q               | C6Q               | L6Q           | D6Q     | S6Q             |
|             |                        | I+Q             | C6X               | L6X           | D6X     | S6X             |

**Table 7 : RINEX Version 3.02 BDS observation codes**

For Galileo the band/frequency number **n** does not necessarily agree with the official frequency numbers: **n** = 7 for E5b, **n** = 8 for E5a+b.

**GPS-SBAS and –pseudorandom noise (PRN) code assignments:**

See e.g., <http://www.losangeles.af.mil/library/factsheets/factsheet.aspx?id=8618>

**Antispoofing (AS) of GPS:** True codeless GPS receivers (squaring-type receivers) use the attribute **N**. Semi-codeless receivers tracking the first frequency using C/A code and the second frequency using some codeless options use attribute **D**. Z-tracking under AS or similar techniques to recover pseudorange and phase on the “P-code” band use attribute **W**. Y-code tracking receivers use attribute **Y**.

Appendix Table A19 enumerates the fractional phase corrections required to align each signal to the frequencies reference signal.

*As all observations affected by “AS on” get now their own attribute (codeless, semi-codeless, Z-tracking and similar) the Antispoofing flag introduced into the observation data records of RINEX Version 2 has become obsolete.*

## 5.2 Satellite system-dependent list of observables

The order of the observations stored per epoch and satellite in the observation records is given by a list of observation codes in a header record. As the types of the observations actually generated by a receiver may heavily depend on the satellite system RINEX Version 3 requests system-dependent observation code list (header record type **SYS / # / OBS TYPES**).

### 5.3 Marker type

In order to indicate the nature of the marker a **MARKER TYPE** header record has been defined:

| Marker Type   | Description                         |
|---------------|-------------------------------------|
| Geodetic      | Earth-fixed high-precision monument |
| Non Geodetic  | Earth-fixed low-precision monument  |
| Non_Physical  | Generated from network processing   |
| Space borne   | Orbiting space vehicle              |
| Air borne     | Aircraft, balloon, etc.             |
| Water Craft   | Mobile water craft                  |
| Ground Craft  | Mobile terrestrial vehicle          |
| Fixed Buoy    | “Fixed” on water surface            |
| Floating Buoy | Floating on water surface           |
| Floating Ice  | Floating ice sheet, etc             |
| Glacier       | “Fixed” on a glacier                |
| Ballistic     | Rockets, shells, etc                |
| Animal        | Animal carrying a receiver          |
| Human         | Human being                         |

**Table 8: Proposed marker type keywords**

The record is required except for **GEODETIC** and **NON\_GEODETIC** marker types.

Attributes other than **GEODETIC** and **NON\_GEODETIC** will tell the user program that the data were collected by a moving receiver. The inclusion of a “start moving antenna” record (event flag 2) into the data body of the RINEX file is therefore not necessary. Event flags 2 and 3 are still necessary to flag alternating kinematic and static phases of a receiver visiting multiple earth-fixed monuments, however.

Users may define other project-dependent keywords.

### 5.4 Half-wavelength observations, half-cycle ambiguities

Half-wavelength observations (collected by **codeless** squaring techniques) get their own observation codes. A special wavelength factor header line and bit 1 of the LLI flag in the observation records are not necessary anymore. If a receiver changed between squaring and full cycle tracking within the time period of a RINEX file, observation codes for both types of observations have to be inserted into the respective **SYS / # / OBS TYPES** header record. Half-wavelength phase observations are stored in full cycles. Ambiguity resolution however has to account for half wavelengths!

Full-cycle observations collected by receivers with possible half cycle ambiguity (e.g., during acquisition or after loss of lock) are to be flagged with Loss of Lock Indicator bit 1 set (see Appendix Table A3).

### 5.5 Scale factor

The *optional* **SYS / SCALE FACTOR** record allows e.g., to store phase data with 0.0001 cycles resolution if the data was multiplied by a scale factor of 10 before being stored into RINEX file. Used to increase resolution by 10, 100, etc only. It is a modification of the Version 2.20 **OBS SCALE FACTOR** record.

### 5.6 Information about receivers on a vehicle

For the processing of data collected by receivers on a vehicle the following additional information can be provided by special header records:

- Antenna position (position of the antenna reference point) in a body-fixed coordinate system: **ANTENNA: DELTA X/Y/Z**
- Bore-sight of antenna: The unit vector of the direction of the antenna axis towards the GNSS satellites. It corresponds to the vertical axis on earth-bound antenna: **ANTENNA: B.SIGHT XYZ**
- Antenna orientation: Zero-direction of the antenna. Used for the application of “azimuth”-dependent phase center variation models (see 6.14 below): **ANTENNA: ZERODIR XYZ**
- Current center of mass of the vehicle (for spaceborne receivers): **CENTER OF MASS: XYZ**
- Average phase center position: **ANTENNA: PHASECENTER** (see below)

All three quantities have to be given in the same body-fixed coordinate system. The attitude of the vehicle has to be provided by separate attitude files in the same body-fixed coordinate system.

## 5.7 Signal strengths

The generation of the RINEX signal strength indicators **sn\_rnx** in the data records (1 = very weak,...,9 = very strong) are standardized in case the raw signal strength<sup>1</sup> **sn\_raw** is given in **dbHz**:

$$\mathbf{sn\_rnx} = \mathbf{MIN(MAX(INT(sn\_raw/6),1),9)}$$

| Signal to Noise ratio(dbHz) | Signal to Noise ratio(RINEX) |
|-----------------------------|------------------------------|
| < 12                        | 1                            |
| 12-17                       | 2                            |
| 18-23                       | 3                            |
| 24-29                       | 4                            |
| 30-35                       | 5                            |
| 36-41                       | 6                            |
| 42-47                       | 7                            |
| 48-53                       | 8                            |
| ≥ 54                        | 9                            |

**Table 9: Standardized S/N indicators**

The raw carrier to noise ratio can be optionally stored as **Sna** observations in the data records should be stored in **dbHz** if possible. The new **SIGNAL STRENGTH UNIT** header record can be used to indicate the units of these observations.

## 5.8 Date/time format in the PGM / RUN BY / DATE header record

The format of the generation time of the RINEX files stored in the second header record **PGM / RUN BY / DATE** is now defined to be

**yyyymmdd hhmmss zone**

**zone:** 3 – 4 character code for the time zone

It is recommended to use **UTC** as time zone. Set **zone** to **LCL** if local time was used with unknown local time system code.

---

<sup>1</sup> S/N is the raw S/N at the output of the correlators, without attempting to recover any correlation losses





by an identifier to make it system-dependent in a later format revision, if necessary. The clock correction is optional and is given in units of seconds.

### 5.12 Ionosphere delay as pseudo-observables

RINEX files could also be used to make available additional information linked to the actual observations. One such element is the ionosphere delay having been determined or derived from an ionosphere model. We add the ionosphere phase delay expressed in full cycles of the respective satellite system-dependent wavelength as pseudo-observable to the list of the RINEX observables.

|                            |                                   |
|----------------------------|-----------------------------------|
| <b>T:</b> observation type | <b>I</b> = Ionosphere phase delay |
| <b>n:</b> band/frequency   | <b>1, 2, ..., 8</b>               |
| <b>a:</b> attribute        | blank                             |

The ionosphere pseudo-observable has to be included into the list of observables of the respective satellite system. Only one ionosphere observable per satellite is allowed.

The user adds the ionosphere delay to the raw phase observation of the same wavelength and converts it to other wavelengths and to pseudorange corrections in meters:

|                 |   |                |   |                                                                |
|-----------------|---|----------------|---|----------------------------------------------------------------|
| corr_phase(fi)  | = | raw_phase(fi)  | + | d_ion(fi)                                                      |
| corr_prange(fi) | = | raw_prange(fi) | - | d_ion(fi) • c/fi                                               |
| d_ion(fk)       | = | d_ion(fi)      | • | (fi/fk)**2 (accounting for 1 <sup>st</sup> order effects only) |

d\_ion(fi): Given ionospheric phase correction for frequency fi

### 5.13 Channel numbers as pseudo-observables

For special applications it might be necessary to know the receiver channel numbers having been assigned by the receiver to the individual satellites. We may include this information as another pseudo-observable:

- **t** : observation type: **x** = Receiver channel number
- **n** : band / frequency : **1**
- **a** : attribute: blank

Lowest channel number allowed is 1 (re-number channels beforehand, if necessary). In case of a receiver using multiple channels for one satellite the channels could be packed with two digits each right-justified into the same data field, order corresponding to the order of the observables concerned. Format F14.3 according to (<5-nc>(2X), <nc>I2.2, '.000'), nc being the number of channels.

*Restriction:* Not more than 5 channels and channel numbers <100.

*Examples:*

- 0910.000 for channels 9 and 10
- 010203.000 for channels 1, 2, and 3

-----F14.3-----

### 5.14 Corrections of differential code biases (DCBs)

For special high-precision applications it might be useful to generate RINEX files with corrections of the differential code biases (DCBs) already applied. There are programs available to correct the observations in RINEX files for differential code biases (e.g., **cc2noncc**, J. Ray 2005). This can be reported by special header records **SYS / DCBS APPLIED** pointing to the file containing the applied corrections.

### 5.15 Corrections of antenna phase center variations (PCVs)

For more precise applications an elevation-or elevation and azimuth-dependent phase center variation (pcv) model for the antenna (referring to the agreed-upon ARP) should be used. For special applications it might be useful to generate RINEX files with these variations already applied. This can be reported by special header records **SYS / PCVS APPLIED** pointing to the file containing the PCV correction models.

### 5.16 Navigation message files

The header portion has been unified (with respect to the format definitions) for all satellite systems. The data portion contains now in the first record of each message block in addition to the satellite number also the code for the satellite system.

|                                                                                 |
|---------------------------------------------------------------------------------|
| G06 1999 09 02 17 51 44 -.839701388031D-03 -.165982783074D-10 .000000000000D+00 |
|---------------------------------------------------------------------------------|

Header records with system-dependent contents also contain the system identifier. They are repeated for each system, if applicable.

|      |           |           |            |            |                  |
|------|-----------|-----------|------------|------------|------------------|
| GPSA | .1676D-07 | .2235D-07 | .1192D-06  | .1192D-06  | IONOSPHERIC CORR |
| GPSB | .1208D+06 | .1310D+06 | -.1310D+06 | -.1966D+06 | IONOSPHERIC CORR |
| GAL  | .1234D+05 | .2345D+04 | -.3456D+03 |            | IONOSPHERIC CORR |

## 6. ADDITIONAL HINTS AND TIPS

### 6.1 Versions

Programs developed to read RINEX files have to verify the version number. Files of newer versions may look different even if they do not use any of the newer features

### 6.2 Leading blanks in CHARACTER fields

We propose that routines to read files automatically delete leading blanks in any CHARACTER input field. Routines creating RINEX files should also left-justify all variables in the CHARACTER fields.

### 6.3 Variable-length records

ASCII files usually have variable record lengths, so we recommend to first read each observation record into a blank string long enough to accommodate the largest possible observation record<sup>2</sup> and decode the data afterwards. In variable length records, empty data fields at the end of a record may be missing, especially in the case of the optional receiver clock offset.

### 6.4 Blank fields

In view of future modifications we recommend to carefully skip any fields currently defined to be blank (format fields nX), because they may be assigned to new contents in future versions.

### 6.5 Order of the header records, order of data records

As the header record descriptors in columns 61-80 are mandatory, the programs reading a RINEX Version 3 header must decode the header records with formats according to the record descriptor, provided the records have been first read into an internal buffer.

We therefore propose to allow free ordering of the header records, with the following exceptions:

- The **RINEX VERSION / TYPE** record must be the first record in a file
- The **SYS / # / OBS TYPES** record(s) should precede any **SYS / DCBS APPLIED** and **SYS / SCALE FACTOR** records.
- The **# OF SATELLITES** record (if present) should be immediately followed by the corresponding number of **PRN / # OF OBS** records. (These records may be handy for documentary purposes. However, since they may only be created after having read whole raw data file we define them to be optional.
- The **END OF HEADER** of course is the last record in the header

---

<sup>2</sup> Defined by the satellite system with the largest number of possible observables plus any “pseudo-observables” like ionosphere, etc. The length limitation to 80 characters of RINEX Versions 1 and 2 has been removed.

**Data records:** Multiple epoch data records with identical time tags are not allowed (exception: Event records). Epochs have to appear ordered in time.

### 6.6 Missing items, duration of the validity of values

Items that are not known at the file creation time can be set to zero or blank or the respective record may be completely omitted. Consequently items of missing header records will be set to zero or blank by the program reading RINEX files. Trailing blanks may be truncated from the record.

Each value remains valid until changed by an additional header record.

### 6.7 Unknown / Undefined observation types and header records

It is a good practice for a program reading RINEX files to make sure that it properly deals with unknown observation types, header records or event flags by skipping them and/or reporting them to the user. The program should also check the RINEX version number in the header record and take proper action if it cannot deal with it.

### 6.8 Event flag records

The “number of satellites” also corresponds to the number of records of the same epoch following the **EPOCH** record. Therefore it may be used to skip the appropriate number of data records if certain event flags are not to be evaluated in detail.

## 6.9 Receiver clock offset

A receiver-derived clock offset can optionally be reported in the RINEX observation files. In order to remove uncertainties about whether the data (epoch, pseudorange, phase) have been corrected or not by the reported clock offset, RINEX Versions 2.10 onward requests a clarifying header record: **RCV CLOCK OFFS APPL**. It would then be possible to reconstruct the original observations, if necessary.

## 6.10 Two-digit years

RINEX version 2 stores the years of data records with two digits only. The header of observation files contains a **TIME OF FIRST OBS** record with the full four-digit year, the GPS nav messages contain the GPS week numbers. From these two data items the unambiguous year can easily be reconstructed.

A hundred-year ambiguity occurs in the met data and GLONASS and GEO nav messages: Instead of introducing a new **TIME OF FIRST OBS** header line it is safe to stipulate that any two-digit years in RINEX Version 1 and Version 2.xx files are understood to represent

|        |           |
|--------|-----------|
| 80-99: | 1980-1999 |
| 00-79: | 2000-2079 |

Full 4-digit year fields are/will be defined in the RINEX version 3 files.

## 6.11 Fit interval (GPS navigation message file)

Bit 17 in word 10 of subframe 2 is a “fit interval” flag which indicates the curve-fit interval used by the GPS Control Segment in determining the ephemeris parameters, as follows (see ICD-GPS-200, 20.3.3.4.3.1):

0 = 4 hours  
1 = greater than 4 hours.

Together with the IODC values and Table 20-XII the actual fit interval can be determined. The second value in the last record of each message shall contain the fit interval in hours determined using IODC, fit flag, and Table 20-XII, according to the Interface Document ICD-GPS-200.

### 6.12 Satellite health (GPS navigation message file)

The health of the signal components (bits 18 to 22 of word three in subframe one) are included from version 2.10 on using the health value reported in the second field of the sixth navigation message record.

A program reading RINEX files could easily decide if bit 17 only or all bits (17-22) have been written:

|              |     |                                       |
|--------------|-----|---------------------------------------|
| RINEX Value: | 0   | Health OK                             |
| RINEX Value: | 1   | Health not OK (bits 18-22 not stored) |
| RINEX Value: | >32 | Health not OK (bits 18-22 stored)     |

### 6.13 Transmission time of message (GPS navigation message file)

The transmission time of a message can be shortly before midnight Saturday/Sunday, the ToE and ToC of the message already in the next week.

As the reported week in the RINEX nav message (**BROADCAST ORBIT -5** record) goes with ToE (this is different from the GPS week in the original satellite message!), the transmission time of message should be reduced by 604800 (i.e., will become negative) to also refer to the same week.

### 6.14 Antenna references, phase centers

We distinguish between

- The *marker*, i.e. the geodetic reference monument, on which an antenna is mounted directly with forced centering or on a tripod.
- The *antenna reference point* (ARP), i.e., a well-defined point on the antenna, e.g., the center of the bottom surface of the preamplifier. The antenna height is measured from the marker to the ARP and reported in the **ANTENNA: DELTA H/E/N** header record. Small horizontal eccentricities of the ARP w/r to the marker can be reported in the same record. On vehicles the position of the ARP is reported in the body-fixed coordinate system in an **ANTENNA: DELTA X/Y/Z** header record.
- The *average phase center*: A frequency-dependent and minimum elevation-angle-dependent position of the average phase center above the antenna reference point. Its position is important to know in mixed-antenna networks. It can be given in an absolute sense or relative to a reference antenna using the optional header record: **ANTENNA: PHASECENTER**. For fixed stations the components are in north/east/up direction, on vehicles the position is reported in the body-fixed system X,Y,Z. For more precise applications an elevation-dependent or elevation and azimuth-dependent phase center variation (PCV) model for the antenna (referring to the agreed-upon ARP) should be

used. For special applications it might be useful to generate RINEX files with these corrections already applied. This can be reported by special header records **SYS / PCVS APPLIED** pointing to the file containing the PCV correction models.

- The **orientation** of the antenna: The “zero direction” is usually oriented towards north on fixed stations. Deviations from the north direction can be reported with the azimuth of the zero-direction in an **ANTENNA: ZERODIR AZI** header record. On vehicles the zero-direction is reported as a unit vector in the body-fixed coordinate system in an **ANTENNA: ZERODIR XYZ** header record. The zero direction of a tilted antenna on a fixed station can be reported as unit vector in the left-handed north/east/up local coordinate system in an **ANTENNA: ZERODIR XYZ** header record.
- The **bore-sight direction** of an antenna on a vehicle: The “vertical” symmetry axis of the antenna pointing towards the GNSS satellites. It can be reported as unit vector in the body-fixed coordinate system in the **ANTENNA: B.SIGHT XYZ** record. A tilted antenna on a fixed station could be reported as unit vector in the left-handed north/east/up local coordinate system in the same type of header record.

To be able to interpret the various positions correctly it is important that the **MARKER TYPE** record is included in the RINEX header.

## 7. RINEX UNDER ANTISPOOFING (AS)

Some receivers generate code (pseudorange) delay differences between the first and second frequency using cross-correlation techniques when AS is on and may recover the phase observations on L2 in full cycles. Using the C/A code delay on L1 and the observed difference it is possible to generate a code delay observation for the second frequency. Other receivers recover P code observations by breaking down the Y code into P and W code.

Most of these observations may suffer from an increased noise level. In order to enable the post-processing programs to take special actions, such AS-infected observations have been flagged in RINEX Version 2 using bit number 2 of the Loss of Lock Indicators (i.e. their current values are increased by 4). In Version 3 there are special attributes for the observation type to more precisely characterize the observable (codeless, semi-codeless, Z-tracking or similar techniques when AS on, L2C, P-code when AS off, Y-code tracking), making the AS flag obsolete.



## 8. DEALING WITH DIFFERENT SATELLITE SYSTEMS

### 8.1 Time system identifier

**GPS** time runs, apart from small differences ( $\ll 1$  microsecond), parallel to UTC. But it is a continuous time scale, i.e. it does not insert any leap seconds. GPS time is usually expressed in GPS weeks and GPS seconds past 00:00:00 (midnight) Saturday/Sunday. GPS time started with week zero at 00:00:00 UT (midnight) on January 6, 1980. Between 1980 and 2012 16 leap seconds have been introduced into UTC.

The GPS week is transmitted by the satellites as a 10 bit number. It has a roll-over after week 1023. The first roll-over happened on August 22, 1999, 00:00:00 GPS time.

In order to avoid ambiguities the GPS week reported in the RINEX navigation message files is a continuous number without roll-over, i.e. ...1023, 1024, 1025, ...

We use **GPS** as time system identifier for the reported GPS time.

**QZSS** runs on QZSS time, which conforms to UTC Japan Standard Time Group (JSTG) time and the offset with respect to GPS time is controlled. The following properties apply to the QZSS time definition: the length of one second is defined with respect to International Atomic Time (TAI); QZSS time is aligned with GPS time (offset from TAI by integer seconds); the QZSS week number is defined with respect to the GPS week.

We use **QZS** as a time system identifier for the reported QZSS time

**GLONASS** is basically running on UTC (or, more precisely, GLONASS system time linked to UTC(SU)), i.e. the time tags are given in UTC and not GPS time. It is not a continuous time, i.e. it introduces the same leap seconds as UTC. The reported GLONASS time has the same hours as UTC and not UTC+3 h as the original GLONASS System Time!

We use **GLO** as time system identifier for the reported GLONASS time.

**Galileo** runs on Galileo System Time (GST), which is, apart from small differences (tens of nanoseconds), nearly identical to GPS time:

- The Galileo week starts at midnight Saturday/Sunday at the same second as the GPS week.
- The GST week as transmitted by the satellites is a 12 bit value with a roll-over after week 4095. The GST week started at zero at the first roll-over of the broadcast GPS week after 1023, i.e. at Sun, 22-Aug-1999 00:00:00 GPS time

In order to remove possible misunderstandings and ambiguities the Galileo week reported in the RINEX navigation message files is a continuous number without roll-over, i.e., ...4095,4096,4097,... and *it is aligned to the GPS week*.

We use **GAL** as time system identifier for this reported Galileo time.

The **BDS** Time (BDT) System is a continuous timekeeping system, with its length of second being a SI second. BDT zero time started at 00:00:00 UTC on January 1<sup>st</sup>, 2006 (GPS week 1356). BDT is synchronized with UTC within 100 nanoseconds (modulo 1 second).

- The **BDT** week starts at midnight Saturday/Sunday.
- The **BDT** week is transmitted by the satellites as a 13 bit number. It has a roll-over after week 8191. In order to avoid ambiguities the BDT week reported in the RINEX navigation message files is a continuous number without roll-over, i.e. ...8191, 8192, 8193, ...

We use **BDT** as time system identifier for the reported BDS time.

| Constellation<br>/Archival Time<br>Representation | GPS<br>Ephemeris<br>Week<br>Period #1 | GPS<br>Ephemeris<br>Week<br>Period #2 | GPS<br>Ephemeris<br>Week Period<br>#3 | GPS<br>Ephemeris<br>Week<br>Period #4 | GPS<br>Ephemeris<br>Week Period<br>#5 | GPS<br>Ephemeris<br>Week Period<br>#6 |
|---------------------------------------------------|---------------------------------------|---------------------------------------|---------------------------------------|---------------------------------------|---------------------------------------|---------------------------------------|
| <b>GPS<br/>Broadcast</b>                          | 0 – 1023                              | 0 – 1023                              | 0 – 1023                              | 0 – 1023                              | 0 – 1023                              | 0 – 1023                              |
| <b>QZSS<br/>Broadcast</b>                         |                                       | 0 – 1023                              | 0 – 1023                              | 0 – 1023                              | 0 – 1023                              | 0 – 1023                              |
| <b>GPS/QZSS<br/>RINEX</b>                         | 0 – 1023                              | 1024 – 2047                           | 2048 – 3071                           | 3072 – 4095                           | 4096 – 5119                           | 5120 -6143                            |
| <b>GST</b>                                        |                                       | 0 – 1023                              | 1024 – 2047                           | 2048 – 3071                           | 3072 – 4095                           | 0 – 1023                              |
| <b>GAL</b>                                        |                                       | 1024 – 2047                           | 2048 – 3071                           | 3072 – 4095                           | 4096 – 5119                           | 5120 – 6143                           |
| <b>BDS</b>                                        |                                       | 0(1356) –<br>691                      | 692 – 1715                            | 1716 – 2739                           | 2740 – 3763                           | 3764 – 4787                           |

**Table 12: Relations between GPS, QZSS, GST, GAL and BDS weeks**

The header records **TIME OF FIRST OBS** and (if present) **TIME OF LAST OBS** in pure GPS, GLONASS, Galileo, QZSS or BDS observation files **can**, in mixed

GPS/GLONASS/Galileo/QZSS/BDS observation files **must** contain the time system identifier defining the system that all time tags in the file are referring to:

- **GPS** to identify GPS time,
- **GLO** to identify the GLONASS UTC time system
- **GAL** to identify Galileo time.
- **QZS** to identify QZSS time.
- **BDT** to identify BDS time.

Pure GPS observation files default to **GPS**, pure GLONASS files default to **GLO**, pure Galileo files default to **GAL** and similarly pure BDS observation files default to **BDT**.

Apart from the small errors in the realizations of the different time systems, the relations between the sys-terms are:

|     |   |     |   |     |   |              |
|-----|---|-----|---|-----|---|--------------|
| GLO | = | UTC | = | GPS | - | $\Delta tLS$ |
| GPS | = | GAL | = | UTC | + | $\Delta tLS$ |

|     |   |     |   |                    |
|-----|---|-----|---|--------------------|
| GPS | = | BDT | + | $\Delta tLS(2006)$ |
|-----|---|-----|---|--------------------|

Where :

|              |   |                                                                                                                                                                                                                     |
|--------------|---|---------------------------------------------------------------------------------------------------------------------------------------------------------------------------------------------------------------------|
| $\Delta tLS$ | = | Delta time between GPS and UTC due to leap seconds, as transmitted by the GPS satellites in the almanac (2005: $\Delta tLS = 13$ , 2006: $\Delta tLS = 14$ , 2008: $\Delta tLS = 15$ and 2012: $\Delta tLS = 16$ ). |
|--------------|---|---------------------------------------------------------------------------------------------------------------------------------------------------------------------------------------------------------------------|

In order to have the current number of leap seconds available we recommend to include  $\Delta tLS$  by a **LEAP SECOND** line into the RINEX file headers.

If there are known non-integer biases between “GPS receiver clock”, “GLONASS receiver clock” or “Galileo receiver clock” in the same receiver, they should be applied in the process of RINEX conversion. In this case the respective code and phase observations have to be corrected too ( $c * \text{bias}$  if expressed in meters).

Unknown biases will have to be solved for during the post processing

The small differences (modulo 1 second) between Galileo system time, GLONASS system time, UTC(SU), UTC(USNO) and GPS system time have to be dealt with during the post-processing and not before the RINEX conversion. It may also be necessary to solve for remaining differences during the post-processing.

## 8.2 Pseudorange definition

The pseudorange (code) measurement is defined to be equivalent to the difference of the time of reception (expressed in the time frame of the receiver) and the time of transmission (expressed in the time frame of the satellite) of a distinct satellite signal.

In a mixed-mode GPS/GLONASS/Galileo/QZSS/BDS receiver referring all pseudorange observations to one receiver clock only,

- the raw GLONASS pseudoranges will show the current number of leap seconds between GPS/GAL/BDT time and GLONASS time if the receiver clock is running in the GPS, GAL or BDT time frame
- the raw GPS, Galileo and BDS pseudoranges will show the negative number of leap seconds between GPS/GAL/BDT time and GLONASS time if the receiver clock is running in the GLONASS time frame

In order to avoid misunderstandings and to keep the code observations within the format fields, the pseudo-ranges must be corrected in this case as follows:

|             |   |         |   |                 |                                                                         |
|-------------|---|---------|---|-----------------|-------------------------------------------------------------------------|
| PR_mod(GPS) | = | PR(GPS) | + | C* $\Delta tLS$ | if generated with a receiver clock running in the GLONASS time frame    |
| PR_mod(GAL) | = | PR(GAL) | + | C* $\Delta tLS$ | if generated with a receiver clock running in the GLONASS time frame    |
| PR_mod(BDT) | = | PR(BDT) | + | C* $\Delta tLS$ | if generated with a receiver clock running in the GLONASS time frame    |
| PR_mod(GLO) | = | PR(GLO) | - | C* $\Delta tLS$ | if generated with a receiver clock running in the GPS or GAL time frame |

to remove the contributions of the leap seconds from the pseudoranges.

$\Delta tLS$  is the actual number of leap seconds between GPS/GAL and GLO time, as broadcast in the GPS almanac and distributed in Circular T of BIPM.

## 8.3 RINEX navigation message files

The header section of the RINEX version 3.00 navigation message files have been slightly changed compared to the previous version 2. The format of the header section is identical for all satellite systems, i.e., GPS, GLONASS, Galileo, SBAS, QZSS and BDS.

The data portion of the navigation message files contains records with floating point numbers. The format is identical for all satellite systems, the number of records per message and the contents, however, are satellite system-dependent. The format of the version 3 data records has been changed slightly, the satellite codes now contain also the satellite system identifier.

It is possible to generate mixed navigation message files, i.e. files containing navigation messages of more than one satellite system. Header records with system-dependent contents have to be repeated for each satellite system, if applicable. Using the satellite system identifier of the satellite code the reading program can determine the number of data records to be read for each message block.

The time tags of the navigation messages (e.g., time of ephemeris, time of clock) are given in the respective satellite time systems!

It is recommended to avoid storing redundant navigation messages (e.g., the same message broadcast at different times) into the RINEX file.

### 8.3.1 RINEX navigation message files for GLONASS

The header section and the first data record (epoch, satellite clock information) are equal to the GPS navigation file. The following three records contain the satellite position, velocity and acceleration, the clock and frequency biases as well as auxiliary information as health, satellite frequency (channel), age of the information.

The corrections of the satellite time to UTC are as follows:

GPS:  $T_{utc} = T_{sv} - a_{f0} - a_{f1} * (T_{sv} - T_{oc}) - \dots - A_0 - \dots - \Delta t_{LS}$

GLONASS:  $T_{utc} = T_{sv} + \tau_N - \gamma_N * (T_{sv} - T_b) + \tau_C$

In order to use the same sign conventions for the GLONASS corrections as in the GPS navigation files, the broadcast GLONASS values are stored as:

$-\tau_N, +\gamma_N, -\tau_C.$

The time tags in the GLONASS navigation files are given in UTC (i.e. **not** Moscow time or GPS time). File naming convention: See above.

### 8.3.2 RINEX navigation message files for Galileo

The Galileo Open Service allows access to two navigation message types: F/NAV (Freely Accessible Navigation) and I/NAV (Integrity Navigation). The contents of the two messages differs in various items, however, in general it is very similar to the contents of the GPS navigation, e.g. the orbit parameterization is the same. The data blocks of the Galileo RINEX navigation messages are identical to a large extent.

There are items in the navigation message that depend on the origin of the message (F/NAV or I/NAV): The SV clock parameters actually define the satellite clock for the dual-frequency ionosphere-free linear combination. F/NAV reports the clock parameters valid for the E5a-E1 combination, the I/NAV reports the parameters for the E5b-E1 combination. The second parameter in the **Broadcast Orbit 5** record (bits 8 and 9) indicate the frequency pair the

stored clock corrections are valid for.

Some parameters contain the information stored bitwise. The interpretation is as follows:

- Convert the floating point number read from the RINEX file into the nearest integer
- Extract the values of the requested bits from the integer

Example:

$0.170000000000D+02 \rightarrow 17 = 2^4 + 2^0 \rightarrow$  Bits 4 and 0 are set, all others are zero

As mentioned above, the GAL week in the RINEX navigation message files is a continuous number; it has been aligned to the GPS week by the program creating the RINEX file.

### 8.3.3 RINEX navigation message files for GEO satellites

As the GEO broadcast orbit format differs from the GPS message a special GEO navigation message file format has been defined which is nearly identical with the GLONASS navigation message file format.

The header section contains information about the generating program, comments, and the difference between the GEO system time and UTC.

The first data record contains the epoch and satellite clock information, the following records contain the satellite position, velocity and acceleration and auxiliary information (health, URA and IODN).

The time tags in the GEO navigation files are given in the GPS time frame, i.e. **not** UTC.

The corrections of the satellite time to UTC are as follows:

GEO:  $T_{utc} = T_{sv} - aGf0 - aGf1 * (T_{sv} - T_{oe}) - W0 - \Delta t_{LS}$

$W0$  being the correction to transform the GEO system time to UTC.  $T_{oe}$ ,  $aGf0$ ,  $aGf1$  see below in the format definition tables.

The *Transmission Time of Message* (**PRN / EPOCH / SV CLK** header record) is expressed in GPS seconds of the week. It marks the beginning of the message transmission. It has to refer to the same GPS week as the *Epoch of Ephemerides*. It has to be adjusted by –or + 604800 seconds, if necessary (which would make it lower than zero or larger than 604800, respectively). It is a redefinition of the Version 2.10 *Message frame time*.

*Health* shall be defined as follows:

- bits 0 to 3 equal to *health* in Message Type 17 (MT17)
- bit 4 is set to 1 if MT17 health is unavailable
- bit 5 is set to 1 if the URA index is equal to 15

### 8.3.4 RINEX navigation message files for QZSS L1-SAIF

As the QZSS L1-SAIF broadcast orbit format differs from the GPS message a special L1-SAIF navigation message file format has been defined which is nearly identical with the GEO navigation message file format.

The header section contains information about the generating program, comments, and the difference between the L1-SAIF system time and UTC.

The first data record contains the epoch and satellite clock information, the following records contain the satellite position, velocity and acceleration and auxiliary information such as health, age of the data, etc. To compute L1-SAIF satellite position, note that acceleration in navigation message represents only perturbation term and it is necessary to add :

The time tags in the L1-SAIF navigation files are given in the GPS time frame, i.e. **not** UTC.

The corrections of the satellite time to UTC are as follows:

SAIF:  $T_{utc} = T_{sv} - a_{Gf0} - a_{Gf1} * (T_{sv} - T_{oe}) - W_0 - \Delta t_{LS}$

$W_0$  being the correction to transform the L1-SAIF system time to UTC.  $T_{oe}$ ,  $a_{Gf0}$ ,  $a_{Gf1}$  see below in the format definition tables.

The *Transmission Time of Message* (**PRN / EPOCH / SV CLK** header record) is expressed in GPS seconds of the week. It marks the beginning of the message transmission. It has to refer to the same GPS week as the *Epoch of Ephemerides*. It has to be adjusted by –or + 604800 seconds, if necessary (which would make it lower than zero or larger than 604800, respectively).

*Health* shall be defined as follows:

- bits 0 to 3 equal to *health* in Message Type 17 (MT17)
- bit 4 is set to 1 if MT17 health is unavailable
- bit 5 is set to 1 if the URA index is equal to 15

Note that accelerations represent only lunar and solar perturbation terms and satellite position can be computed based on equations in Section A.3.1.2 of GLONASS ICD version 5.0. See Appendix A14

### 8.3.5 RINEX navigation message files for BDS

The BDS Open Service broadcast navigation message; in general, is similar to the contents of the GPS navigation message

The header section and the first data record (epoch, satellite clock information) are equal to the GPS navigation file. The following seven records are similar to the GPS navigation.

The BDT week number is a continuous number. The broadcast 13-bit BDS System Time week has a roll-over after 8191. It starts at zero at : 1-Jan-2006, Hence  $\text{BDT week} = \text{BDT week\_BRD} + (n \times 8192)$  (Where n: number of BDT roll-overs). See Appendix Table A13 for details.

#### 8.4 RINEX observation files for GEO satellites

A separate satellite system identifier has been defined for the Satellite-Based Augmentation System (SBAS) payloads: **S**, to be used in the **RINEX VERSION / TYPE** header line and in the satellite identifier **snn**, **nn** being the GEO PRN number minus 100.

e.g.: PRN = 120  $\Rightarrow$  **snn** = **S20**

In mixed dual frequency GPS satellite / single frequency GEO payload observation files the fields for the second frequency observations of SBAS satellites remain blank, are set to zero values or (if last in the record) can be truncated.

The time system identifier of GEO satellites generating GPS signals defaults to GPS time. In the SBAS message definitions bit 3 of the health is currently marked as *reserved*. In case of bit 4 set to 1, it is recommended to set bits 0,1,2,3 to 1, as well.

*User Range Accuracy (URA):*

The same convention for converting the URA index to meters is used as with GPS. Set URA = 32767 meters if URA index = 15.

*Issue Of Data Navigation (IODN)*

The IODN is defined as the 8 first bits after the message type 9, called *IODN* in RTCA DO229, Annex A and Annex B and called *spare* in Annex C.

The **CORR TO SYSTEM TIME** header record has been replaced by the more general record **D-UTC. A0, A1, T, W, S, U** in Version 2.11.



## 9. MODIFICATIONS FOR VERSION 3.01 and 3.02

### 9.1 Phase Cycle Shifts

Carrier phases tracked on different signal channels or modulation bands of the same frequency may differ in phase by 1/4 (e.g., GPS: P/Y-code-derived L2 phase vs. L2C-based phase) or, in some exceptional cases, by other fractional parts of a cycle. Appendix Table19 specifies the reference signal and the phase shifts that are specified by the Interface Control Documentation (ICD) for each constellation.

All phase observations **must** be aligned in RINEX 3.01 and later files and the new **SYS / PHASE SHIFT** header is mandatory. See Appendix Table 2 for the messages definition. If the phase alignment is not known then the observation data **should not** be published in a RINEX 3.0x file. In order to facilitate data processing, phase observations stored in RINEX files **must** be consistent across all satellites of a satellite system and across each frequency band. Within a RINEX 3.0x file:

- Phase observations must be shifted by the respective fraction of a cycle, either directly by the receiver or by a correction program or the RINEX conversion program, prior to RINEX file generation, to align them to each other.
- Phase corrections must be reported in a new mandatory **SYS / PHASE SHIFT** header record to allow the reconstruction of the original values, if needed. The uncorrected reference signal group of observations are left blank in the **SYS / PHASE SHIFT** records. Appendix Table19 specifies the reference signal that should be used by each constellation and frequency band. Additionally, Appendix Table19 indicates the relationship between the phase observations for each frequency's signals.

Concerning the mandatory **SYS / PHASE SHIFT header** records:

- If the **SYS / PHASE SHIFT** record values are set to zero in the RINEX file, then either the raw data provided by the receiver or the data format (RTCM-Multiple Signal Messages format for example) have been already aligned the phase observations and the RINEX conversion program did not apply any phase corrections since they had already been applied. In this case Appendix Table19 can be used to determine the fractional cycles that had been added to each signal's phase observation to align the phase observations to the reference signal.
- If the file does not contain any observation pairs affected by phase shifts (i.e. only reference signals reported) the observation code field is defined and the rest of the **SYS / PHASE SHIFT** header record field of the respective satellite system(s) are left blank.
- If the reported phase correction of an observation type does not affect all satellites of the same system, the header record allows for the affected satellites to be indicated.

- If the applied phase corrections or the phase alignment is unknown the observation code field and the rest of the **SYS / PHASE SHIFT** header record field of the respective satellite system(s) are left blank. This use case is intended for exceptional situations where the data is intended for special projects and analysis.

Sign of the correction  $\Delta\phi$ :

| $\phi$ RINEX    | = | $\phi$ original                                                                                                   | + | $\Delta\phi$ |
|-----------------|---|-------------------------------------------------------------------------------------------------------------------|---|--------------|
| $\phi$ original | : | Uncorrected or corrected, i.e. as issued by the GNSS receiver or in a standardized data stream such as RTCM-MSM   |   |              |
| $\Delta\phi$    | : | Phase correction to align the phase to other phases of the same frequency but different channel / modulation band |   |              |

Example (Definition see Appendix Table A2):

```

----|----1|0----|----2|0----|----3|0----|----4|0----|----5|0----|----6|0----|----7|0----|----8|
G L2S -0.25000 03 G15 G16 G17                                     SYS / PHASE SHIFT

```

## 9.2 Galileo: BOC-Tracking of an MBOC-Modulated Signal

Galileo E1 will be modulated by the so-called MBOC modulation. Obviously it is possible for a receiver to track the signal also in a BOC mode, leading to different noise characteristics, though. In order to keep this non-standard tracking mode of a MBOC signal apart, bit 2 of the loss-of-lock indicator LLI (the antispoofing flag not used for Galileo) in the observation data records is used.

Non-standard BOC tracking of an MBOC-modulated signal: Increase the LLI by 4.

Example: Satellite E11, BOC tracking on L1C, LLI = 4:

```

----|----1|0----|----2|0----|----3|0----|----4|0----|----5|0----|----6|0----|----7|0----|----8|
G   5 C1C L1W L2W C1W S2W                                     SYS / # / OBS TYPES
R   2 C1C L1C                                                  SYS / # / OBS TYPES
E   2 L1C L5I                                                  SYS / # / OBS TYPES
S   2 C1C L1C                                                  SYS / # / OBS TYPES
    18.000                                                    INTERVAL
                                     END OF HEADER
> 2006 03 24 13 10 36.0000000 0 5 -0.123456789012
G06 23629347.915 .300 8 -.353 4 23629347.158 24.158
G09 20891534.648 -.120 9 -.358 6 20891545.292 38.123
G12 20607600.189 -.430 9 .394 5 20607600.848 35.234
E11 .32448 .178 7
S20 38137559.506 335849.135 9

```

### 9.3 BDS Satellite System Code

A satellite system code for BeiDou navigation satellite System (BDS) has been defined C, see Figure 1.

### 9.4 New Observation Codes for GPS L1C and BDS

New observation codes for GPS L1C and BDS observables have been defined: See Tables 2 and 7.

### 9.5 Header Records for GLONASS Slot and Frequency Numbers

In order to make available a cross-reference list between the GLONASS slot numbers used in the RINEX files to designate the GLONASS satellites and the allotted frequency numbers, an optional observation file header record is assigned. This allows processing of GLONASS files without having to get this information from GLONASS navigation message files or other sources.

Example (Definition See Appendix Table A2):

|      |      |         |      |         |      |         |      |         |      |         |      |         |      |         |      |    |                      |
|------|------|---------|------|---------|------|---------|------|---------|------|---------|------|---------|------|---------|------|----|----------------------|
| ---- | ---- | 1 0---- | ---- | 2 0---- | ---- | 3 0---- | ---- | 4 0---- | ---- | 5 0---- | ---- | 6 0---- | ---- | 7 0---- | ---- | 8  |                      |
| 18   | R01  | 1       | R02  | 2       | R03  | 3       | R04  | 4       | R05  | 5       | R06  | -6      | R07  | -5      | R08  | -4 | GLONASS SLOT / FRQ # |
|      | R09  | -3      | R10  | -2      | R11  | -1      | R12  | 0       | R13  | 1       | R14  | 2       | R15  | 3       | R16  | 4  | GLONASS SLOT / FRQ # |
|      | R17  | 5       | R18  | -5      |      |         |      |         |      |         |      |         |      |         |      |    | GLONASS SLOT / FRQ # |

### 9.6 GNSS Navigation Message File: Leap Seconds Record

The optional **LEAP SECONDS** record was modified to also include TLS, WNLSF (adjusted to continuous week number) and DN.

### 9.7 Clarifications in the Galileo Navigation Message File:

Some clarifications in the Galileo **BROADCAST ORBIT - 5** and **BROADCAST ORBIT - 6** records were added (see Table A8).

### 9.8 RINEX Meteorological Data Files

The version number is adjusted to 3.01.

### 9.9 Added Quasi-Zenith Satellite System (QZSS) Version 3.02

The version number is adjusted to 3.02. Added QZSS : specifications, parameters and definitions to the documentation. Each QZSS satellite broadcasts signals using two PRN codes. The GPS compatible signals are broadcast using PRN codes in the range of 193-197. In a RINEX observation file the PRN code is: broadcast prn - 192, yielding: J01, J02 etc.. QZSS satellites also broadcasts a SBAS signal (QZSS-SAIF) using PRN codes in the range of 183-187. In a RINEX SBAS file the PRN code is: broadcast prn - 100, yielding: S83, S84 etc..

Added Appendix Table 19 to enable users to convert each signal's aligned phase observations back to raw satellite phase.

## 9.10 Added GLONASS Mandatory Code-Phase Alignment Header Record

Recent analysis has revealed that some GNSS receivers produce biased GLONASS observations. The code-phase bias results in the code and phase observations not being measured at the same time. To remedy this problem a mandatory GLONASS Code-Phase header bias record is required. Although this header message is mandatory it can contain zeros if the GLONASS data issued by the receiver is aligned. See the GLONASS CODE/PHASE BIAS (**GLONASS COD/PHS/BIS**) definition in Appendix Table A2. The GLONASS code-phase alignment message contains: L1C, L1P, L2C and L2P corrections. Phase data from GNSS receivers that issues biased data has to be corrected by the amount specified in the **GLONASS COD/PHS/BIS** record before it is written in RINEX format. To align the non-aligned L1C phase to the pseudo range observation the following correction is required:  $\text{AlignedL1Cphase} = \text{ObservedL1Cphase} + (\text{GLONASSC1C\_CodePhaseBias\_M} / \text{Lambda})$  Where :

- AlignedL1Cphase in cycles (written to RINEX file)
- ObservedL1Cphase in cycles
- GLONASSC1C\_CodePhaseBias\_M is in metres;
- Lambda is the wavelength for the particular GLONASS frequency.

GLONASS L1P, L2C and L2P are handled in the same manner.

Example (Definition see Appendix Table A2 for details) :

```

----|---1|0---|---2|0---|---3|0---|---4|0---|---5|0---|---6|0---|---7|0---|---8|
C1C  -10.000 C1P  -10.123 C2C  -10.432 C2P  -10.634          GLONASS COD/PHS/BIS#

```

## 9.11 Added BDS system (Replaces Compass)

Added BDS : naming convention, time system definition, header section description, and parameters through out the document. Updated: Sections: 8.1, 8.2, 8.3.5, 9.11 and Appendix Table A2, added ephemeris Table A13 and updated Table A19.

## 10. REFERENCES

- Evans, A. (1989): "Summary of the Workshop on GPS Exchange Formats." Proceedings of the Fifth International Geodetic Symposium on Satellite Systems, pp. 917ff, Las Cruces.
- Gurtner, W., G. Mader, D. Arthur (1989): "A Common Exchange Format for GPS Data." CSTG GPS Bulletin Vol.2 No.3, May/June 1989, National Geodetic Survey, Rockville.
- Gurtner, W., G. Mader (1990a): "The RINEX Format: Current Status, Future Developments." Proceedings of the Second International Symposium of Precise Positioning with the Global Positioning system, pp. 977ff, Ottawa.
- Gurtner, W., G. Mader (1990b): "Receiver Independent Exchange Format Version 2." CSTG GPS Bulletin Vol.3 No.3, Sept/Oct 1990, National Geodetic Survey, Rockville.
- Gurtner, W. (1994): "RINEX: The Receiver-Independent Exchange Format." GPS World, Volume 5, Number 7, July 1994.
- Gurtner, W. (2002): "RINEX: The Receiver Independent Exchange Format Version 2.10". <ftp://igscb.jpl.nasa.gov/igscb/data/format/rinex210.txt>
- Gurtner, W., L. Estey (2002): "RINEX Version 2.20 Modifications to Accommodate Low Earth Orbiter Data". [ftp://ftp.unibe.ch/aiub/rinex/rnx\\_leo.txt](ftp://ftp.unibe.ch/aiub/rinex/rnx_leo.txt)
- Gurtner, W., L. Estey (2005): "RINEX: The Receiver Independent Exchange Format Version 2.11". <ftp://igscb.jpl.nasa.gov/igscb/data/format/rinex211.txt>
- Gurtner, W., L. Estey (2007): "RINEX: The Receiver Independent Exchange Format Version 3.00". <ftp://igscb.jpl.nasa.gov/igscb/data/format/rinex300.pdf>
- Hatanaka, Y (2008): "A Compression Format and Tools for GNSS Observation Data". Bulletin of the Geographical Survey Institute, Vol. 55, pp 21-30, Tsukuba, March 2008. <http://www.gsi.go.jp/ENGLISH/Bulletin55.html>
- Ray, J., W. Gurtner (1999): "RINEX Extensions to Handle Clock Information". [ftp://igscb.jpl.nasa.gov/igscb/data/format/rinex\\_clock.txt](ftp://igscb.jpl.nasa.gov/igscb/data/format/rinex_clock.txt).
- Ray, J. (2005): "Final update for P1-C1 bias values & cc2noncc". IGSMail 5260
- Rothacher, M., R. Schmid (2005): "ANTEX: The Antenna Exchange Format Version 1.3". <ftp://igscb.jpl.nasa.gov/pub/station/general/antex13.txt>.
- Schaer, S., W. Gurtner, J. Feltens (1998): "IONEX: The Ionosphere Map Exchange Format Version 1". <ftp://igscb.jpl.nasa.gov/igscb/data/format/ionex1.pdf>
- Suard, N., W. Gurtner, L. Estey (2004): "Proposal for a new RINEX-type Exchange File for GEO SBAS Broadcast Data". [ftp://igscb.jpl.nasa.gov/igscb/data/format/geo\\_sbass.txt](ftp://igscb.jpl.nasa.gov/igscb/data/format/geo_sbass.txt)

Document RTCA DO 229, Appendix A

Document GAL OS SIS ICD/D.0: Galileo Interface Control Document, Revision 0, 23/05/2006, Chapter 9.

Quasi-Zenith Satellite System, Navigation Service, Interface Specification for QZSS (IS-QZSS), V1.4, Japan Aerospace Exploration Agency, February 28, 2012

BeiDou Navigation Satellite System, Signal In Space, Interface Control Document, Open Service Signal, B1I (Version1.0), China Satellite Navigation Office December 2012

## APPENDIX: RINEX FORMAT DEFINITIONS AND EXAMPLES

### A 1 RINEX File name description

| Table A1<br>RINEX File name description                  |                                                                                                                                                                                           |                 |                  |                                                                                                                                                                                                                                                          |
|----------------------------------------------------------|-------------------------------------------------------------------------------------------------------------------------------------------------------------------------------------------|-----------------|------------------|----------------------------------------------------------------------------------------------------------------------------------------------------------------------------------------------------------------------------------------------------------|
| Field                                                    | Field Description                                                                                                                                                                         | Example         | Required         | Comment/Example                                                                                                                                                                                                                                          |
| <SITE/<br>STATION-<br>MONUMENT/<br>RECEIVER/<br>COUNTRY/ | XXXXMRCCC<br>Where:<br>XXXX - existing<br>IGS station name<br>M – monument or<br>marker number (0-9)<br>R – receiver number<br>(0-9)<br>CCC – ISO Country<br>code<br>(Total 9 characters) | ALGO00CAN       | Yes              | File name supports a maximum of<br>10 monuments at the same station<br>and a maximum of 10 receivers<br>per monument.<br><br>Country codes follow : ISO 3166-<br>1 alpha-3                                                                               |
| <DATA SOURCE>                                            | Data Source<br>R – From Receiver<br>data using vendor or<br>other software<br>S – From data Stream<br>(RTCM or other)<br>U – Unknown<br>(1 character)                                     | R               | Yes              | This field is used to indicate how<br>the data was collected either from<br>the receiver at the station or from<br>a data stream                                                                                                                         |
| <START TIME>                                             | YYYYDDHHMM<br>YYYY – Gregorian<br>year 4 digits,<br>DDD – day of Year,<br>HHMM – hours and<br>minutes of day<br><br>(11 characters)                                                       | 2012150<br>1200 | Yes              | For GPS and Mixed files use :<br>GPS Year, day of year, hour of<br>day, minute of day (see text<br>below for details)<br>Start time should be the nominal<br>start time of the first observation.<br>GLONASS, Galileo etc use<br>respective time system. |
| <FILE PERIOD>                                            | DDU<br>DD – file period<br>U – units of file<br>period.<br>File period is used to<br>specify intended<br>collection period of<br>the file.<br>(3 characters)                              | 15M             | Yes              | File Period<br>15M–15 Minutes<br>01H–1 Hour<br>01D–1 Day<br>01Y–1 Year<br>00U-Unspecified                                                                                                                                                                |
| <DATA FREQ>                                              | DDU                                                                                                                                                                                       | 05Z             | Mandatory<br>for | XXC – 100 Hertz<br>XXZ – Hertz,                                                                                                                                                                                                                          |

| <b>Table A1</b><br><b>RINEX File name description</b> |                                                            |                |                                                                       |                                                                                                                                                                                                                                                                                                                                                                        |
|-------------------------------------------------------|------------------------------------------------------------|----------------|-----------------------------------------------------------------------|------------------------------------------------------------------------------------------------------------------------------------------------------------------------------------------------------------------------------------------------------------------------------------------------------------------------------------------------------------------------|
| <b>Field</b>                                          | <b>Field Description</b>                                   | <b>Example</b> | <b>Required</b>                                                       | <b>Comment/Example</b>                                                                                                                                                                                                                                                                                                                                                 |
|                                                       | DD – data rate<br>U – units of data rate<br>(3 characters) |                | RINEX<br>Obs. Data.<br>NOT<br>required<br>for<br>Navigation<br>Files. | XXS – Seconds,<br>XXM – Minutes,<br>XXH – Hours,<br>XXD – Days<br>XXU – Unspecified                                                                                                                                                                                                                                                                                    |
| <DATA TYPE >                                          | DD<br>DD – Data type<br><br>(2 characters)                 | MO             | Yes                                                                   | Two characters represent the data type:<br>GO - GPS Obs.,<br>RO - GLONASS Obs.,<br>EO - Galileo Obs.<br>JO - QZSS Obs.<br>CO - BDS Obs.<br>SO - SBAS Obs.<br>MO Mixed Obs.<br>GN - Nav. GPS,<br>RN- Glonass Nav.,<br>EN- Galileo Nav.,<br>JN- QZSS Nav.,<br>CN- BDS Nav.<br>SN- SBAS Nav.<br>MN- Nav. All GNSS Constellations)<br>MM-Meteorological Observation<br>Etc |
| <FORMAT>                                              | FFF<br>FFF – File format<br><br>(3 characters)             | rnX            | Yes                                                                   | Three character indicating the data format :<br>RINEX - rnX,<br>Hatanaka Compressed RINEX – crX, ETC                                                                                                                                                                                                                                                                   |
| <COMPRESSION>                                         | (2-3 Characters)                                           | gz             | No                                                                    | gz                                                                                                                                                                                                                                                                                                                                                                     |
| Sub Total                                             | 34 or 35                                                   |                |                                                                       | Fields                                                                                                                                                                                                                                                                                                                                                                 |
| Separators                                            | (7 characters –Obs. File)<br>(6 characters –Eph. File)     |                |                                                                       | _ under score between all fields and “.” Between data type and file format and the compression method                                                                                                                                                                                                                                                                  |
| Total                                                 | 41-42(Obs. File)<br>37-38 (Eph. File)                      |                |                                                                       | Mandatory IGS RINEX obs. Characters                                                                                                                                                                                                                                                                                                                                    |

### Filename Details and Examples:



**<STATION/PROJECT NAME>**: IGS users should follow XXXXMRECC (9 char) site and station naming convention described above.

GNSS industry users could use the 9 characters to indicate the project name and/or number.

**<DATA SOURCE>**: With real-time data streaming RINEX files for the same station can be created at many locations. If the RINEX file is derived from data collected at the receiver (official file) then the source is specified as R. On the other hand if the RINEX file is derived from a real-time data stream then the data source is marked as S to indicate Streamed data source. If the data source is unknown the source is marked as U.

**<START TIME>**: The start time is the file intended start time which should coincide with the first observation in the file. GPS file start time is specified in GPS Time. Mixed observation file start times are defined in GPS Time. Files containing only: GLONASS, Galileo, QZSS, BDS or SBAS observations are all based on their respective time system.

**<FILE PERIOD>**: Is used to specify the intended collection period of the file.

GNSS observation file name - file period examples:

ALGO00CAN\_R\_20121601000\_15M\_01S\_GO.rnx.gz //15 min, GPS Obs. 1 sec.  
ALGO00CAN\_R\_20121601000\_01H\_05Z\_MO.rnx.gz //1 hour, Obs Mixed and 5Hz  
ALGO00CAN\_R\_20121601000\_01D\_30S\_GO.rnx.gz //1 day, Obs GPS and 30 sec  
ALGO00CAN\_R\_20121601000\_01D\_30S\_MO.rnx.gz //1 day, Obs. Mixed, 30 sec

GNSS navigation file name - file period examples:

ALGO00CAN\_R\_20121600000\_15M\_GN.rnx.gz // 15 minute GPS only  
ALGO00CAN\_R\_20121600000\_01H\_GN.rnx.gz // 1 hour GPS only  
ALGO00CAN\_R\_20121600000\_01D\_MN.rnx.gz // 1 day mixed

**<DATA FREQ>**: Used to distinguish between observation files that cover the same period but contain data at a different sampling rate. GNSS data file - observation frequency examples:

ALGO00CAN\_R\_20121601000\_01D\_01C\_GO.rnx.gz //100 Hz data rate  
ALGO00CAN\_R\_20121601000\_01D\_05Z\_RO.rnx.gz //5 Hz data rate  
ALGO00CAN\_R\_20121601000\_01D\_01S\_EO.rnx.gz //1 second data rate  
ALGO00CAN\_R\_20121601000\_01D\_05M\_JO.rnx.gz //5 minute data rate  
ALGO00CAN\_R\_20121601000\_01D\_01H\_CO.rnx.gz //1 hour data rate

ALGO00CAN\_R\_20121601000\_01D\_01D\_SO.rnx.gz //1 day data rate  
ALGO00CAN\_R\_20121601000\_01D\_00U\_MO.rnx.gz //Unspecified

Note : Data frequency field not required for RINEX Navigation files.

**< DATA TYPE/ FORMAT/>**: The data type describes the content of the file. The first character indicates constellation and the second indicates whether the files contains observations or navigation data. The next three characters indicate the data file format. GNSS observation filename - format/data type examples:

ALGO00CAN\_R\_20121601000\_15M\_01S\_GO.rnx.gz //RINEX obs. GPS  
ALGO00CAN\_R\_20121601000\_15M\_01S\_RO.rnx.gz //RINEX obs. GLONASS  
ALGO00CAN\_R\_20121601000\_15M\_01S\_EO.rnx.gz //RINEX obs. Galileo  
ALGO00CAN\_R\_20121601000\_15M\_01S\_JO.rnx.gz //RINEX obs. QZSS  
ALGO00CAN\_R\_20121601000\_15M\_01S\_CO.rnx.gz //RINEX obs. BDS  
ALGO00CAN\_R\_20121601000\_15M\_01S\_SO.rnx.gz //RINEX obs. SBAS  
ALGO00CAN\_R\_20121601000\_15M\_01S\_MO.rnx.gz //RINEX obs. mixed

GNSS navigation filename examples:

ALGO00CAN\_R\_20121600000\_01H\_GN.rnx.gz //RINEX nav. GPS  
ALGO00CAN\_R\_20121600000\_01H\_RN.rnx.gz //RINEX nav. GLONASS  
ALGO00CAN\_R\_20121600000\_01H\_EN.rnx.gz //RINEX nav. Galileo  
ALGO00CAN\_R\_20121600000\_01H\_JN.rnx.gz //RINEX nav. QZSS  
ALGO00CAN\_R\_20121600000\_01H\_CN.rnx.gz //RINEX nav. BDS  
ALGO00CAN\_R\_20121600000\_01H\_SN.rnx.gz //RINEX nav. SBAS  
ALGO00CAN\_R\_20121600000\_01H\_MN.rnx.gz //RINEX nav. mixed

**<COMPRESSION>**:

Valid compression methods include: UNIX Compress “.Z”, gzip - “.gz”, bzip2 - “.bz2” and “.zip”.

## A 2 GNSS Observation Data File -Header Section Description

| <b>TABLE A2</b><br><b>GNSS OBSERVATION DATA FILE - HEADER SECTION DESCRIPTION</b> |                                                                                                                                                                                                                                                                                                                                                                                                                                                                                                                                                                                                                                             |                                 |
|-----------------------------------------------------------------------------------|---------------------------------------------------------------------------------------------------------------------------------------------------------------------------------------------------------------------------------------------------------------------------------------------------------------------------------------------------------------------------------------------------------------------------------------------------------------------------------------------------------------------------------------------------------------------------------------------------------------------------------------------|---------------------------------|
| <b>HEADER LABEL</b><br>(Columns 61-80)                                            | <b>DESCRIPTION</b>                                                                                                                                                                                                                                                                                                                                                                                                                                                                                                                                                                                                                          | <b>FORMAT</b>                   |
| <b>RINEX VERSION / TYPE</b>                                                       | Format version : <b>3.02</b><br>File type: <b>O</b> for Observation Data<br>- Satellite System:<br>- <b>G</b> : GPS<br>- <b>R</b> : GLONASS<br>- <b>E</b> : Galileo<br>- <b>J</b> : QZSS<br>- <b>C</b> : BDS<br>- <b>S</b> : SBAS payload<br>- <b>M</b> : Mixed                                                                                                                                                                                                                                                                                                                                                                             | F9.2, 11X,<br>A1,19X,<br>A1,19X |
| <b>PGM / RUN BY / DATE</b>                                                        | - Name of program creating current file<br>- Name of agency creating current file<br>- Date and time of file creation<br>Format: yyymmdd hhmmss zone<br>zone: 3-4 char. code for time zone.<br>'UTC ' recommended!<br>'LCL ' if local time with unknown local time<br>system code                                                                                                                                                                                                                                                                                                                                                           | A20,<br>A20,<br>A20             |
| <b>* COMMENT</b>                                                                  | Comment line(s)                                                                                                                                                                                                                                                                                                                                                                                                                                                                                                                                                                                                                             | A60                             |
| <b>MARKER NAME</b>                                                                | Name of antenna marker                                                                                                                                                                                                                                                                                                                                                                                                                                                                                                                                                                                                                      | A60                             |
| <b>* MARKER NUMBER</b>                                                            | Number of antenna marker                                                                                                                                                                                                                                                                                                                                                                                                                                                                                                                                                                                                                    | A20                             |
| <b>MARKER TYPE</b>                                                                | Type of the marker:<br><b>GEODETIC</b> : Earth-fixed, high- precision monument<br><b>NON_GEODETIC</b> : Earth-fixed, low- precision monument<br><b>NON_PHYSICAL</b> : Generated from network processing<br><b>SPACEBORNE</b> : Orbiting space vehicle<br><b>GROUND_CRAFT</b> : Mobile terrestrial vehicle<br><b>WATER_CRAFT</b> : Mobile water craft<br><b>AIRBORNE</b> : Aircraft, balloon, etc.<br><b>FIXED_BUOY</b> : "Fixed" on water surface<br><b>FLOATING_BUOY</b> : Floating on water surface<br><b>FLOATING_ICE</b> : Floating ice sheet, etc.<br><b>GLACIER</b> : "Fixed" on a glacier<br><b>BALLISTIC</b> : Rockets, shells, etc | A20,40X                         |

| <b>TABLE A2</b><br><b>GNSS OBSERVATION DATA FILE - HEADER SECTION DESCRIPTION</b> |                                                                                                                                                                                                                     |                                  |
|-----------------------------------------------------------------------------------|---------------------------------------------------------------------------------------------------------------------------------------------------------------------------------------------------------------------|----------------------------------|
|                                                                                   | <b>ANIMAL</b> : Animal carrying a receiver<br><b>HUMAN</b> : Human being<br>Record required except for <b>GEODETIC</b> and <b>NON_GEODETIC</b> marker types. Users may define other project-dependent keywords.     |                                  |
| <b>OBSERVER / AGENCY</b>                                                          | Name of observer / agency                                                                                                                                                                                           | A20,A40                          |
| <b>REC # / TYPE / VERS</b>                                                        | Receiver number, type, and version (Version: e.g. Internal Software Version)                                                                                                                                        | 3A20                             |
| <b>ANT # / TYPE</b>                                                               | Antenna number and type                                                                                                                                                                                             | 2A20                             |
| <b>APPROX POSITION XYZ</b>                                                        | Geocentric approximate marker position (Units: Meters, System: ITRS recommended) Optional for moving platforms                                                                                                      | 3F14.4                           |
| <b>ANTENNA: DELTA H/E/N</b>                                                       | - Antenna height: Height of the antenna reference point (ARP) above the marker<br>- Horizontal eccentricity of ARP relative to the marker (east/north)<br>All units in meters                                       | F14.4,<br>2F14.4                 |
| <b>* ANTENNA: DELTA X/Y/Z</b>                                                     | Position of antenna reference point for antenna on vehicle (m): XYZ vector in body-fixed coord. system                                                                                                              | 3F14.4                           |
| <b>*ANTENNA:PHASE CENTER</b>                                                      | Average phase center position w/r to antenna reference point (m)<br>- Satellite system ( <b>G/R/E/J/C/S</b> )<br>- Observation code<br>- North/East/Up (fixed station) or<br>- X/Y/Z in body-fixed system (vehicle) | A1,<br>1X,A3,<br>F9.4,<br>2F14.4 |
| <b>* ANTENNA: B.SIGHT XYZ</b>                                                     | Direction of the “vertical” antenna axis towards the GNSS satellites.<br>Antenna on vehicle: Unit vector in body-fixed coord. System<br>Tilted antenna on fixed station: Unit vector in N/E/Up left-handed system   | 3F14.4                           |
| <b>* ANTENNA: ZERODIR AZI</b>                                                     | Azimuth of the zero-direction of a fixed antenna (degrees, from north)                                                                                                                                              | F14.4                            |
| <b>* ANTENNA: ZERODIR XYZ</b>                                                     | Zero-direction of antenna<br>Antenna on vehicle: Unit vector in body-fixed coord. system<br>Tilted antenna on fixed station: Unit vector in N/E/Up left-handed system                                               | 3F14.4                           |
| <b>* CENTER OF MASS: XYZ</b>                                                      | Current center of mass (X,Y,Z, meters) of vehicle in body-fixed coordinate system. Same system as used for attitude.                                                                                                | 3F14.4                           |

| <b>TABLE A2</b><br><b>GNSS OBSERVATION DATA FILE - HEADER SECTION DESCRIPTION</b> |                                                                                                                                                                                                                                                                                                                                                                                                                                                                                                                                                                                                                                                                                                                                                                                                                                                                                                                                                                                                                                                                                                                                                                                                                                                                                                                                                                                                                                                                                                                                                                                                                                                                                                                                                                                                                                           |                   |    |                   |  |    |       |  |          |       |  |    |       |            |    |             |  |    |       |            |    |                   |  |     |       |            |    |       |  |     |        |  |    |       |            |     |       |  |    |       |            |       |       |          |            |       |                                                                        |
|-----------------------------------------------------------------------------------|-------------------------------------------------------------------------------------------------------------------------------------------------------------------------------------------------------------------------------------------------------------------------------------------------------------------------------------------------------------------------------------------------------------------------------------------------------------------------------------------------------------------------------------------------------------------------------------------------------------------------------------------------------------------------------------------------------------------------------------------------------------------------------------------------------------------------------------------------------------------------------------------------------------------------------------------------------------------------------------------------------------------------------------------------------------------------------------------------------------------------------------------------------------------------------------------------------------------------------------------------------------------------------------------------------------------------------------------------------------------------------------------------------------------------------------------------------------------------------------------------------------------------------------------------------------------------------------------------------------------------------------------------------------------------------------------------------------------------------------------------------------------------------------------------------------------------------------------|-------------------|----|-------------------|--|----|-------|--|----------|-------|--|----|-------|------------|----|-------------|--|----|-------|------------|----|-------------------|--|-----|-------|------------|----|-------|--|-----|--------|--|----|-------|------------|-----|-------|--|----|-------|------------|-------|-------|----------|------------|-------|------------------------------------------------------------------------|
| <b>SYS / # / OBS TYPES</b>                                                        | <ul style="list-style-type: none"> <li>- Satellite system code (<b>G/R/E/J/C/S/M</b>)</li> <li>- Number of different observation types for the specified satellite system</li> <li>- Observation descriptors: <ul style="list-style-type: none"> <li>o Type</li> <li>o Band</li> <li>o Attribute</li> </ul> </li> </ul> <p>Use continuation line(s) for more than 13 observation descriptors.</p> <p>In mixed files: Repeat for each satellite system. These records should precede any <b>SYS / SCALE FACTOR</b> records (see below).</p> <p>The following observation descriptors are defined in RINEX Version 3.xx:</p> <p>Type:</p> <p><b>C</b> = Code / Pseudorange<br/> <b>L</b> = Phase<br/> <b>D</b> = Doppler<br/> <b>S</b> = Raw signal strength(carrier to noise ratio)<br/> <b>I</b> = Ionosphere phase delay<br/> <b>X</b> = Receiver channel numbers</p> <p>Band:</p> <table style="width: 100%; border-collapse: collapse;"> <tr> <td style="width: 5%;"><b>1</b> =</td><td style="width: 40%;">L1</td><td style="width: 55%;">(GPS, QZSS, SBAS)</td></tr> <tr> <td></td><td>G1</td><td>(GLO)</td></tr> <tr> <td></td><td>E2-L1-E1</td><td>(GAL)</td></tr> <tr> <td></td><td>B1</td><td>(BDS)</td></tr> <tr> <td><b>2</b> =</td><td>L2</td><td>(GPS, QZSS)</td></tr> <tr> <td></td><td>G2</td><td>(GLO)</td></tr> <tr> <td><b>5</b> =</td><td>L5</td><td>(GPS, QZSS, SBAS)</td></tr> <tr> <td></td><td>E5a</td><td>(GAL)</td></tr> <tr> <td><b>6</b> =</td><td>E6</td><td>(GAL)</td></tr> <tr> <td></td><td>LEX</td><td>(QZSS)</td></tr> <tr> <td></td><td>B3</td><td>(BDS)</td></tr> <tr> <td><b>7</b> =</td><td>E5b</td><td>(GAL)</td></tr> <tr> <td></td><td>B2</td><td>(BDS)</td></tr> <tr> <td><b>8</b> =</td><td>E5a+b</td><td>(GAL)</td></tr> <tr> <td><b>0</b></td><td>for type X</td><td>(all)</td></tr> </table> | <b>1</b> =        | L1 | (GPS, QZSS, SBAS) |  | G1 | (GLO) |  | E2-L1-E1 | (GAL) |  | B1 | (BDS) | <b>2</b> = | L2 | (GPS, QZSS) |  | G2 | (GLO) | <b>5</b> = | L5 | (GPS, QZSS, SBAS) |  | E5a | (GAL) | <b>6</b> = | E6 | (GAL) |  | LEX | (QZSS) |  | B3 | (BDS) | <b>7</b> = | E5b | (GAL) |  | B2 | (BDS) | <b>8</b> = | E5a+b | (GAL) | <b>0</b> | for type X | (all) | <p>A1,<br/>2X,I3,<br/><br/>13(1X,A3)</p> <p><br/>6X,<br/>13(1X,A3)</p> |
| <b>1</b> =                                                                        | L1                                                                                                                                                                                                                                                                                                                                                                                                                                                                                                                                                                                                                                                                                                                                                                                                                                                                                                                                                                                                                                                                                                                                                                                                                                                                                                                                                                                                                                                                                                                                                                                                                                                                                                                                                                                                                                        | (GPS, QZSS, SBAS) |    |                   |  |    |       |  |          |       |  |    |       |            |    |             |  |    |       |            |    |                   |  |     |       |            |    |       |  |     |        |  |    |       |            |     |       |  |    |       |            |       |       |          |            |       |                                                                        |
|                                                                                   | G1                                                                                                                                                                                                                                                                                                                                                                                                                                                                                                                                                                                                                                                                                                                                                                                                                                                                                                                                                                                                                                                                                                                                                                                                                                                                                                                                                                                                                                                                                                                                                                                                                                                                                                                                                                                                                                        | (GLO)             |    |                   |  |    |       |  |          |       |  |    |       |            |    |             |  |    |       |            |    |                   |  |     |       |            |    |       |  |     |        |  |    |       |            |     |       |  |    |       |            |       |       |          |            |       |                                                                        |
|                                                                                   | E2-L1-E1                                                                                                                                                                                                                                                                                                                                                                                                                                                                                                                                                                                                                                                                                                                                                                                                                                                                                                                                                                                                                                                                                                                                                                                                                                                                                                                                                                                                                                                                                                                                                                                                                                                                                                                                                                                                                                  | (GAL)             |    |                   |  |    |       |  |          |       |  |    |       |            |    |             |  |    |       |            |    |                   |  |     |       |            |    |       |  |     |        |  |    |       |            |     |       |  |    |       |            |       |       |          |            |       |                                                                        |
|                                                                                   | B1                                                                                                                                                                                                                                                                                                                                                                                                                                                                                                                                                                                                                                                                                                                                                                                                                                                                                                                                                                                                                                                                                                                                                                                                                                                                                                                                                                                                                                                                                                                                                                                                                                                                                                                                                                                                                                        | (BDS)             |    |                   |  |    |       |  |          |       |  |    |       |            |    |             |  |    |       |            |    |                   |  |     |       |            |    |       |  |     |        |  |    |       |            |     |       |  |    |       |            |       |       |          |            |       |                                                                        |
| <b>2</b> =                                                                        | L2                                                                                                                                                                                                                                                                                                                                                                                                                                                                                                                                                                                                                                                                                                                                                                                                                                                                                                                                                                                                                                                                                                                                                                                                                                                                                                                                                                                                                                                                                                                                                                                                                                                                                                                                                                                                                                        | (GPS, QZSS)       |    |                   |  |    |       |  |          |       |  |    |       |            |    |             |  |    |       |            |    |                   |  |     |       |            |    |       |  |     |        |  |    |       |            |     |       |  |    |       |            |       |       |          |            |       |                                                                        |
|                                                                                   | G2                                                                                                                                                                                                                                                                                                                                                                                                                                                                                                                                                                                                                                                                                                                                                                                                                                                                                                                                                                                                                                                                                                                                                                                                                                                                                                                                                                                                                                                                                                                                                                                                                                                                                                                                                                                                                                        | (GLO)             |    |                   |  |    |       |  |          |       |  |    |       |            |    |             |  |    |       |            |    |                   |  |     |       |            |    |       |  |     |        |  |    |       |            |     |       |  |    |       |            |       |       |          |            |       |                                                                        |
| <b>5</b> =                                                                        | L5                                                                                                                                                                                                                                                                                                                                                                                                                                                                                                                                                                                                                                                                                                                                                                                                                                                                                                                                                                                                                                                                                                                                                                                                                                                                                                                                                                                                                                                                                                                                                                                                                                                                                                                                                                                                                                        | (GPS, QZSS, SBAS) |    |                   |  |    |       |  |          |       |  |    |       |            |    |             |  |    |       |            |    |                   |  |     |       |            |    |       |  |     |        |  |    |       |            |     |       |  |    |       |            |       |       |          |            |       |                                                                        |
|                                                                                   | E5a                                                                                                                                                                                                                                                                                                                                                                                                                                                                                                                                                                                                                                                                                                                                                                                                                                                                                                                                                                                                                                                                                                                                                                                                                                                                                                                                                                                                                                                                                                                                                                                                                                                                                                                                                                                                                                       | (GAL)             |    |                   |  |    |       |  |          |       |  |    |       |            |    |             |  |    |       |            |    |                   |  |     |       |            |    |       |  |     |        |  |    |       |            |     |       |  |    |       |            |       |       |          |            |       |                                                                        |
| <b>6</b> =                                                                        | E6                                                                                                                                                                                                                                                                                                                                                                                                                                                                                                                                                                                                                                                                                                                                                                                                                                                                                                                                                                                                                                                                                                                                                                                                                                                                                                                                                                                                                                                                                                                                                                                                                                                                                                                                                                                                                                        | (GAL)             |    |                   |  |    |       |  |          |       |  |    |       |            |    |             |  |    |       |            |    |                   |  |     |       |            |    |       |  |     |        |  |    |       |            |     |       |  |    |       |            |       |       |          |            |       |                                                                        |
|                                                                                   | LEX                                                                                                                                                                                                                                                                                                                                                                                                                                                                                                                                                                                                                                                                                                                                                                                                                                                                                                                                                                                                                                                                                                                                                                                                                                                                                                                                                                                                                                                                                                                                                                                                                                                                                                                                                                                                                                       | (QZSS)            |    |                   |  |    |       |  |          |       |  |    |       |            |    |             |  |    |       |            |    |                   |  |     |       |            |    |       |  |     |        |  |    |       |            |     |       |  |    |       |            |       |       |          |            |       |                                                                        |
|                                                                                   | B3                                                                                                                                                                                                                                                                                                                                                                                                                                                                                                                                                                                                                                                                                                                                                                                                                                                                                                                                                                                                                                                                                                                                                                                                                                                                                                                                                                                                                                                                                                                                                                                                                                                                                                                                                                                                                                        | (BDS)             |    |                   |  |    |       |  |          |       |  |    |       |            |    |             |  |    |       |            |    |                   |  |     |       |            |    |       |  |     |        |  |    |       |            |     |       |  |    |       |            |       |       |          |            |       |                                                                        |
| <b>7</b> =                                                                        | E5b                                                                                                                                                                                                                                                                                                                                                                                                                                                                                                                                                                                                                                                                                                                                                                                                                                                                                                                                                                                                                                                                                                                                                                                                                                                                                                                                                                                                                                                                                                                                                                                                                                                                                                                                                                                                                                       | (GAL)             |    |                   |  |    |       |  |          |       |  |    |       |            |    |             |  |    |       |            |    |                   |  |     |       |            |    |       |  |     |        |  |    |       |            |     |       |  |    |       |            |       |       |          |            |       |                                                                        |
|                                                                                   | B2                                                                                                                                                                                                                                                                                                                                                                                                                                                                                                                                                                                                                                                                                                                                                                                                                                                                                                                                                                                                                                                                                                                                                                                                                                                                                                                                                                                                                                                                                                                                                                                                                                                                                                                                                                                                                                        | (BDS)             |    |                   |  |    |       |  |          |       |  |    |       |            |    |             |  |    |       |            |    |                   |  |     |       |            |    |       |  |     |        |  |    |       |            |     |       |  |    |       |            |       |       |          |            |       |                                                                        |
| <b>8</b> =                                                                        | E5a+b                                                                                                                                                                                                                                                                                                                                                                                                                                                                                                                                                                                                                                                                                                                                                                                                                                                                                                                                                                                                                                                                                                                                                                                                                                                                                                                                                                                                                                                                                                                                                                                                                                                                                                                                                                                                                                     | (GAL)             |    |                   |  |    |       |  |          |       |  |    |       |            |    |             |  |    |       |            |    |                   |  |     |       |            |    |       |  |     |        |  |    |       |            |     |       |  |    |       |            |       |       |          |            |       |                                                                        |
| <b>0</b>                                                                          | for type X                                                                                                                                                                                                                                                                                                                                                                                                                                                                                                                                                                                                                                                                                                                                                                                                                                                                                                                                                                                                                                                                                                                                                                                                                                                                                                                                                                                                                                                                                                                                                                                                                                                                                                                                                                                                                                | (all)             |    |                   |  |    |       |  |          |       |  |    |       |            |    |             |  |    |       |            |    |                   |  |     |       |            |    |       |  |     |        |  |    |       |            |     |       |  |    |       |            |       |       |          |            |       |                                                                        |
| <b>SYS / # / OBS TYPES</b><br>(Continued)                                         | <p>Attribute:</p> <p><b>P</b> = P code-based (GPS,GLO)<br/> <b>C</b> = C code-based (SBAS,GPS,GLO, QZSS)<br/> <b>D</b> = semi-codeless (GPS)<br/> <b>Y</b> = Y code-based (GPS)</p>                                                                                                                                                                                                                                                                                                                                                                                                                                                                                                                                                                                                                                                                                                                                                                                                                                                                                                                                                                                                                                                                                                                                                                                                                                                                                                                                                                                                                                                                                                                                                                                                                                                       |                   |    |                   |  |    |       |  |          |       |  |    |       |            |    |             |  |    |       |            |    |                   |  |     |       |            |    |       |  |     |        |  |    |       |            |     |       |  |    |       |            |       |       |          |            |       |                                                                        |

| <b>TABLE A2</b><br><b>GNSS OBSERVATION DATA FILE - HEADER SECTION DESCRIPTION</b> |                                                                                                                                                                                                                                                                                                                                                                                                                                                                                                                                                                                                                                                                                                                                                                                                                                                                                                                                                                                                                                                                                                                                                                                                                                                                                |         |
|-----------------------------------------------------------------------------------|--------------------------------------------------------------------------------------------------------------------------------------------------------------------------------------------------------------------------------------------------------------------------------------------------------------------------------------------------------------------------------------------------------------------------------------------------------------------------------------------------------------------------------------------------------------------------------------------------------------------------------------------------------------------------------------------------------------------------------------------------------------------------------------------------------------------------------------------------------------------------------------------------------------------------------------------------------------------------------------------------------------------------------------------------------------------------------------------------------------------------------------------------------------------------------------------------------------------------------------------------------------------------------|---------|
|                                                                                   | <p> <b>M</b> = M code-based (GPS)<br/> <b>N</b> = codeless (GPS)<br/> <b>A</b> = A channel (GAL)<br/> <b>B</b> = B channel (GAL)<br/> <b>C</b> = C channel (GAL)<br/> <b>I</b> = I channel (GPS,GAL, QZSS, BDS)<br/> <b>Q</b> = Q channel (GPS,GAL, QZSS, BDS)<br/> <b>S</b> = M channel (L2C GPS, QZSS)<br/> <b>L</b> = L channel (L2C GPS, QZSS)<br/> <b>S</b> = D channel (GPS, QZSS)<br/> <b>L</b> = P channel (GPS, QZSS) </p> <p> <b>X</b> = B+C channels (GAL)<br/> I+Q channels (GPS,GAL, QZSS, BDS)<br/> M+L channels (GPS, QZSS)<br/> D+P channels (GPS, QZSS) </p> <p> <b>W</b> = based on Z-tracking (GPS)<br/> (see text) </p> <p> <b>Z</b> = A+B+C channels (GAL) </p> <p> <b>blank</b> : for types <b>I</b> and <b>X</b> (all) or unknown tracking mode<br/> All characters in uppercase only! </p> <p> Units :<br/> Phase : full cycles<br/> Pseudorange : meters<br/> Doppler : Hz<br/> SNR etc : receiver-dependent<br/> Ionosphere : full cycles<br/> Channel # : See text </p> <p> Sign definition: See text. </p> <p> The sequence of the observations in the observation records has to correspond to the sequence of the types in this record of the respective satellite system. </p> <p> The attribute can be left blank if not known. See text! </p> |         |
| <b>* SIGNAL STRENGTH UNIT</b>                                                     | Unit of the carrier to noise ratio observables <b>Snn</b> (if present) <b>DBHZ</b> : S/N given in dbHz<br>...                                                                                                                                                                                                                                                                                                                                                                                                                                                                                                                                                                                                                                                                                                                                                                                                                                                                                                                                                                                                                                                                                                                                                                  | A20,40X |

| <b>TABLE A2</b><br><b>GNSS OBSERVATION DATA FILE - HEADER SECTION DESCRIPTION</b> |                                                                                                                                                                                                                                                                                                                                                                                                                                                                                                                                                                                                                                    |                              |
|-----------------------------------------------------------------------------------|------------------------------------------------------------------------------------------------------------------------------------------------------------------------------------------------------------------------------------------------------------------------------------------------------------------------------------------------------------------------------------------------------------------------------------------------------------------------------------------------------------------------------------------------------------------------------------------------------------------------------------|------------------------------|
| <b>* INTERVAL</b>                                                                 | Observation interval in seconds                                                                                                                                                                                                                                                                                                                                                                                                                                                                                                                                                                                                    | F10.3                        |
| <b>TIME OF FIRST OBS</b>                                                          | <ul style="list-style-type: none"> <li>- Time of first observation record (4-digit-year, month, day, hour, min, sec)</li> </ul> Time system: <ul style="list-style-type: none"> <li>- <b>GPS</b> (=GPS time system)</li> <li>- <b>GLO</b> (=UTC time system)</li> <li>- <b>GAL</b> (=Galileo System Time)</li> <li>- <b>QZS</b> (= QZSS time system)</li> <li>- <b>BDT</b> (=BDS Time system)</li> </ul> Compulsory in mixed GNSS files<br>Defaults:<br><b>GPS</b> for pure GPS files<br><b>GLO</b> for pure GLONASS files<br><b>GAL</b> for pure Galileo files<br><b>QZS</b> for pure QZSS files<br><b>BDT</b> for pure BDS files | 5I6,F13.7,<br><br>5X,A3      |
| <b>* TIME OF LAST OBS</b>                                                         | <ul style="list-style-type: none"> <li>- Time of last observation record (4-digit-year, month, day, hour, min, sec)</li> <li>- Time system: Same value as in <b>TIME OF FIRST OBS</b> record</li> </ul>                                                                                                                                                                                                                                                                                                                                                                                                                            | 5I6,F13.7,<br><br>5X,A3      |
| <b>* RCV CLOCK OFFS APPL</b>                                                      | Epoch, code, and phase are corrected by applying the realtime-derived receiver clock offset: 1=yes, 0=no; default: 0=no Record required if clock offsets are reported in the <b>EPOCH/SAT</b> records                                                                                                                                                                                                                                                                                                                                                                                                                              | I6                           |
| <b>* SYS / DCBS APPLIED</b>                                                       | <ul style="list-style-type: none"> <li>- Satellite system (<b>G/R/E/J/C/S</b>)</li> <li>- Program name used to apply differential code bias corrections</li> <li>- Source of corrections (URL)</li> </ul> Repeat for each satellite system.<br>No corrections applied: Blank fields or record not present.                                                                                                                                                                                                                                                                                                                         | A1,<br>1X,A17,<br><br>1X,A40 |
| <b>* SYS / PCVS APPLIED</b>                                                       | <ul style="list-style-type: none"> <li>- Satellite system (<b>G/R/E/J/C/S</b>)</li> <li>- Program name used to apply phase center variation corrections</li> <li>- Source of corrections (URL)</li> </ul> Repeat for each satellite system.<br>No corrections applied: Blank fields or record not present.                                                                                                                                                                                                                                                                                                                         | A1,<br>1X,A17,<br><br>1X,A40 |
| <b>* SYS / SCALE FACTOR</b>                                                       | <ul style="list-style-type: none"> <li>- Satellite system (<b>G/R/E/J/C/S</b>)</li> <li>- Factor to divide stored observations with before use (1,10,100,1000)</li> <li>- Number of observation types involved. 0 or</li> </ul>                                                                                                                                                                                                                                                                                                                                                                                                    | A1,<br>1X,I4,<br><br>2X,I2,  |

| <b>TABLE A2</b><br><b>GNSS OBSERVATION DATA FILE - HEADER SECTION DESCRIPTION</b> |                                                                                                                                                                                                                                                                                                                                                                                                                                                                                                                                                                                                                                                                                                                                                   |                                                                                           |
|-----------------------------------------------------------------------------------|---------------------------------------------------------------------------------------------------------------------------------------------------------------------------------------------------------------------------------------------------------------------------------------------------------------------------------------------------------------------------------------------------------------------------------------------------------------------------------------------------------------------------------------------------------------------------------------------------------------------------------------------------------------------------------------------------------------------------------------------------|-------------------------------------------------------------------------------------------|
|                                                                                   | <p>blank: All observation types</p> <ul style="list-style-type: none"> <li>- List of observation types</li> </ul> <p>Use continuation line(s) for more than 12 observation types.</p> <p>Repeat record if different factors are applied to different observation types.</p> <p>A value of 1 is assumed if record is missing.</p>                                                                                                                                                                                                                                                                                                                                                                                                                  | <p>12(1X,A3)</p> <p>10X,<br/>12(1X,A3)</p>                                                |
| <b>SYS / PHASE SHIFT</b>                                                          | <p>Phase shift correction used to generate phases consistent w/r to cycle shifts</p> <ul style="list-style-type: none"> <li>- Satellite system (<b>G/R/E/J/C/S</b>)</li> <li>- Carrier phase observation code</li> <li>- Type</li> <li>- Band</li> <li>- Attribute</li> <li>- Correction applied (cycles)</li> <li>- Number of satellites involved 0 or blank: All satellites of system</li> <li>- List of satellites</li> </ul> <p>Use continuation line(s) for more than 10 satellites.</p> <p>Repeat the record for all affected codes.</p> <p>Leave observation code and rest of the field blank if applied corrections for the respective satellite system are unknown.</p> <p>phase(RINEX) = phase(orig) + correction. See chapter 9.1!</p> | <p>A1,1X,<br/>A3,1X,</p> <p>F8.5<br/>2X,I2.2,</p> <p>10(1X,A3)<br/>18X,<br/>10(1X,A3)</p> |
| <b>GLONASS SLOT / FRQ #</b>                                                       | <p>GLONASS slot and frequency numbers</p> <ul style="list-style-type: none"> <li>- Number of satellites in list</li> </ul> <p>List of :</p> <ul style="list-style-type: none"> <li>- Satellite numbers (system code, slot)</li> <li>- Frequency numbers (-7...+6)</li> </ul> <p>Use continuation lines for more than 8 Satellites</p>                                                                                                                                                                                                                                                                                                                                                                                                             | <p>I3,1X,</p> <p>8(A1,I2.2,<br/>1X,I2,1X)<br/>4X,8(A1,<br/>I2.2,1X,I2,1<br/>X)</p>        |
| <b>GLONASS COD/PHS/BIS</b>                                                        | <p>GLONASS Phase bias correction used to align code and phase observations.</p> <ul style="list-style-type: none"> <li>- GLONASS signal identifier : C1C and Code Phase bias correction (metres)</li> <li>- GLONASS signal identifier : C1P and Code Phase bias correction (metres)</li> <li>- GLONASS signal identifier : C2C and Code</li> </ul>                                                                                                                                                                                                                                                                                                                                                                                                | <p>4(X1,A3,X1,<br/>F8.3)</p>                                                              |



| <b>TABLE A2</b><br><b>GNSS OBSERVATION DATA FILE - HEADER SECTION DESCRIPTION</b> |                                                                                                                                                                                                                                                                                                                                                                                                  |                                      |
|-----------------------------------------------------------------------------------|--------------------------------------------------------------------------------------------------------------------------------------------------------------------------------------------------------------------------------------------------------------------------------------------------------------------------------------------------------------------------------------------------|--------------------------------------|
|                                                                                   | Phase bias correction (metres)<br>- GLONASS signal identifier : C2P and Code<br>Phase bias correction (metres)                                                                                                                                                                                                                                                                                   |                                      |
| <b>* LEAP SECONDS</b>                                                             | - Number of leap seconds since 6-Jan-1980 as transmitted by the GPS almanac <code>_t_LS</code><br>- Future or past leap seconds <code>_t_LSF</code><br>- Respective week number <code>WN_LSF</code> (continuous number)<br>- Respective day number <code>DN</code><br>(see ICD-GPS-200C 20.3.3.5.2.4)<br>Zero or blank if not known                                                              | I6,<br>I6,<br>I6,<br>I6              |
| <b>* # OF SATELLITES</b>                                                          | Number of satellites, for which observations are stored in the file                                                                                                                                                                                                                                                                                                                              | I6                                   |
| <b>* PRN / # OF OBS</b>                                                           | Satellite numbers, number of observations for each observation type indicated in the <b>SYS / # / OBS TYPES</b> record.<br><br>If more than 9 observation types:<br>Use continuation line(s)<br>In order to avoid format overflows, 99999 indicates $\geq 99999$ observations in the RINEX file.<br><br>This record is (these records are) repeated for each satellite present in the data file. | 3X,<br>A1,I2.2,<br>9I6<br><br>6X,9I6 |
| <b>END OF HEADER</b>                                                              | Last record in the header section.                                                                                                                                                                                                                                                                                                                                                               | 60X                                  |

Records marked with \* are optional

### A 3 GNSS Observation Data File -Data Record Description

| <b>TABLE A3</b><br><b>GNSS OBSERVATION DATA FILE – DATA RECORD DESCRIPTION</b>                                                                                                                                                                                                                                                                                                                                                                                                                                                                                                                                                                                                                                                                                                                                                                                                                                                                                                                                                                                                                                                                                                                                                                            |                                                                                                              |
|-----------------------------------------------------------------------------------------------------------------------------------------------------------------------------------------------------------------------------------------------------------------------------------------------------------------------------------------------------------------------------------------------------------------------------------------------------------------------------------------------------------------------------------------------------------------------------------------------------------------------------------------------------------------------------------------------------------------------------------------------------------------------------------------------------------------------------------------------------------------------------------------------------------------------------------------------------------------------------------------------------------------------------------------------------------------------------------------------------------------------------------------------------------------------------------------------------------------------------------------------------------|--------------------------------------------------------------------------------------------------------------|
| <b>DESCRIPTION</b>                                                                                                                                                                                                                                                                                                                                                                                                                                                                                                                                                                                                                                                                                                                                                                                                                                                                                                                                                                                                                                                                                                                                                                                                                                        | <b>FORMAT</b>                                                                                                |
| <p><b>EPOCH</b> record</p> <ul style="list-style-type: none"> <li>- Record identifier : &gt;</li> <li>- Epoch</li> <li>- year (4 digits):</li> <li>- month, day, hour, min (two digits)</li> <li>- sec</li> <li>- Epoch flag <ul style="list-style-type: none"> <li>0: OK</li> <li>1: power failure between previous and current epoch</li> <li>&gt;1: Special event</li> </ul> </li> <li>- Number of satellites observed in current epoch</li> <li>- (reserved)</li> <li>- Receiver clock offset (seconds, optional)</li> </ul>                                                                                                                                                                                                                                                                                                                                                                                                                                                                                                                                                                                                                                                                                                                          | <p>A1,</p> <p>1X,I4,</p> <p>4(1X,I2.2),</p> <p>F11.7,</p> <p>2X,I1,</p> <p>I3,</p> <p>6X,</p> <p>F15.12,</p> |
| <p>Epoch flag = 0 or 1: <b>OBSERVATION</b> records follow</p> <ul style="list-style-type: none"> <li>- Satellite number</li> <li>- Observation - repeat within record for each observation</li> <li>- LLI - type (same sequence as given in the respective <b>SYS / # / OBS TYPES</b> record)</li> <li>- Signal strength</li> </ul> <p>This record is repeated for each satellite having been observed in the current epoch. The record length is given by the number of observation types for this satellite.</p> <p>Observations: For definition see text.</p> <p>Missing observations are written as 0.0 or blanks.Phase values overflowing the fixed format F14.3 have to be clipped into the valid interval (e.g add or subtract 10**9), set bit 0 of LLI indicator.</p> <p>Loss of lock indicator (LLI).</p> <p>0 or blank: OK or not known</p> <p>Bit 0 set : Lost lock between previous and current observation: Cycle slip possible. For phase observations only.</p> <p>Bit 1 set : Half-cycle ambiguity/slip possible. Software not capable of handling half cycles should skip this observation. Valid for the current epoch only.</p> <p>Bit 2 set : Galileo BOC-tracking of an MBOC-modulated signal (may suffer from increased noise).</p> | <p>A1,I2.2,</p> <p>m(F14.3,</p> <p>I1,</p> <p>I1)</p>                                                        |

| <b>TABLE A3</b><br><b>GNSS OBSERVATION DATA FILE – DATA RECORD DESCRIPTION</b>                                                                                                                                                                                                                                                                                                                                                                                                                                                                                                                                                                                                   |                                    |
|----------------------------------------------------------------------------------------------------------------------------------------------------------------------------------------------------------------------------------------------------------------------------------------------------------------------------------------------------------------------------------------------------------------------------------------------------------------------------------------------------------------------------------------------------------------------------------------------------------------------------------------------------------------------------------|------------------------------------|
| Signal strength projected into interval 1-9:<br>1: minimum possible signal strength<br>5: average S/N ratio<br>9: maximum possible signal strength<br>0 or blank: not known, don't care<br>Standardization for S/N values given in dBHz: See text.                                                                                                                                                                                                                                                                                                                                                                                                                               |                                    |
| <ul style="list-style-type: none"> <li>- Epoch flag 2-5: <b>EVENT</b>: <i>Special records</i> may follow</li> <li>- Epoch flag</li> <li>- 2: start moving antenna</li> <li>- 3: new site occupation (end of kinematic data) (at least MARKER NAME record follows)</li> <li>- 4: header information follows</li> <li>- 5: external event (epoch is significant, same time frame as observation time tags)</li> <li>- "Number of satellites" contains number of special records to follow. 0 if no special records follow.</li> <li>- Maximum number of records: 999</li> </ul> <p>For events without significant epoch the epoch fields in the EPOCH RECORD can be left blank</p> | <div>[2X,I1]</div> <div>[I3]</div> |
| <ul style="list-style-type: none"> <li>- Epoch flag = 6: <b>EVENT</b>: <i>Cycle slip records</i> follow</li> <li>- Epoch flag</li> <li>- 6: cycle slip records follow to optionally report detected and repaired cycle slips (same format as <b>OBSERVATIONS</b> records;               <ul style="list-style-type: none"> <li>o slip instead of observation;</li> <li>o LLI and signal strength blank or zero)</li> </ul> </li> </ul>                                                                                                                                                                                                                                           | [2X,I1]                            |

## A 4 GNSS Observation Data File - Example

| TABLE A4                                                                            |  |  |  |  |  |  |  |  |  |
|-------------------------------------------------------------------------------------|--|--|--|--|--|--|--|--|--|
| GNSS OBSERVATION DATA FILE - EXAMPLE                                                |  |  |  |  |  |  |  |  |  |
| ----- ---1 0--- ---2 0--- ---3 0--- ---4 0--- ---5 0--- ---6 0--- ---7 0--- ---8 0- |  |  |  |  |  |  |  |  |  |
| 3.02 OBSERVATION DATA M RINEX VERSION / TYPE                                        |  |  |  |  |  |  |  |  |  |
| G = GPS R = GLONASS E = GALILEO S = GEO M = MIXED COMMENT                           |  |  |  |  |  |  |  |  |  |
| XXRINEXO V9.9 AIUB 20060324 144333 UTC PGM / RUN BY / DATE                          |  |  |  |  |  |  |  |  |  |
| EXAMPLE OF A MIXED RINEX FILE VERSION 3.02 COMMENT                                  |  |  |  |  |  |  |  |  |  |
| The file contains L1 pseudorange and phase data of the COMMENT                      |  |  |  |  |  |  |  |  |  |
| geostationary AOR-E satellite (PRN 120 = S20) COMMENT                               |  |  |  |  |  |  |  |  |  |
| A 9080 MARKER NAME                                                                  |  |  |  |  |  |  |  |  |  |
| 9080.1.34 MARKER NUMBER                                                             |  |  |  |  |  |  |  |  |  |
| BILL SMITH ABC INSTITUTE OBSERVER / AGENCY                                          |  |  |  |  |  |  |  |  |  |
| X1234A123 GEODETIC 1.3.1 REC # / TYPE / VERS                                        |  |  |  |  |  |  |  |  |  |
| G1234 ROVER ANT # / TYPE                                                            |  |  |  |  |  |  |  |  |  |
| 4375274. 587466. 4589095. APPROX POSITION XYZ                                       |  |  |  |  |  |  |  |  |  |
| .9030 .0000 .0000 ANTENNA: DELTA H/E/N                                              |  |  |  |  |  |  |  |  |  |
| 0 RCV CLOCK OFFS APPL                                                               |  |  |  |  |  |  |  |  |  |
| G 5 C1C L1W L2W C1W S2W SYS / # / OBS TYPES                                         |  |  |  |  |  |  |  |  |  |
| R 2 C1C L1C SYS / # / OBS TYPES                                                     |  |  |  |  |  |  |  |  |  |
| E 2 L1B L5I SYS / # / OBS TYPES                                                     |  |  |  |  |  |  |  |  |  |
| S 2 C1C L1C SYS / # / OBS TYPES                                                     |  |  |  |  |  |  |  |  |  |
| 18.000 INTERVAL                                                                     |  |  |  |  |  |  |  |  |  |
| G APPL_DCB xyz.uvw.abc//pub/dcb_gps.dat SYS / DCBS APPLIED                          |  |  |  |  |  |  |  |  |  |
| DBHZ SIGNAL STRENGTH UNIT                                                           |  |  |  |  |  |  |  |  |  |
| 2006 03 24 13 10 36.0000000 GPS TIME OF FIRST OBS                                   |  |  |  |  |  |  |  |  |  |
| 18 R01 1 R02 2 R03 3 R04 4 R05 5 R06 -6 R07 -5 R08 -4 GLONASS SLOT / FRQ #          |  |  |  |  |  |  |  |  |  |
| R09 -3 R10 -2 R11 -1 R12 0 R13 1 R14 2 R15 3 R16 4 GLONASS SLOT / FRQ #             |  |  |  |  |  |  |  |  |  |
| R17 5 R18 -5 GLONASS SLOT / FRQ #                                                   |  |  |  |  |  |  |  |  |  |
| C1C -10.000 C1P -10.123 C2C -10.432 C2P -10.634 GLONASS COD/PHS/BIS                 |  |  |  |  |  |  |  |  |  |
| END OF HEADER                                                                       |  |  |  |  |  |  |  |  |  |
| > 2006 03 24 13 10 36.0000000 0 5 -0.123456789012                                   |  |  |  |  |  |  |  |  |  |
| G06 23629347.915 .300 8 -.353 4 23629347.158 24.158                                 |  |  |  |  |  |  |  |  |  |
| G09 20891534.648 -.120 9 -.358 6 20891545.292 38.123                                |  |  |  |  |  |  |  |  |  |
| G12 20607600.189 -.430 9 .394 5 20607600.848 35.234                                 |  |  |  |  |  |  |  |  |  |
| E11 .324 8 .178 7                                                                   |  |  |  |  |  |  |  |  |  |
| S20 38137559.506 335849.135 9                                                       |  |  |  |  |  |  |  |  |  |
| > 2006 03 24 13 10 54.0000000 0 7 -0.123456789210                                   |  |  |  |  |  |  |  |  |  |
| G06 23619095.450 -53875.632 8 -41981.375 4 23619095.008 25.234                      |  |  |  |  |  |  |  |  |  |
| G09 20886075.667 -28688.027 9 -22354.535 7 20886076.101 42.231                      |  |  |  |  |  |  |  |  |  |
| G12 20611072.689 18247.789 9 14219.770 6 20611072.410 36.765                        |  |  |  |  |  |  |  |  |  |
| R21 21345678.576 12345.567 5                                                        |  |  |  |  |  |  |  |  |  |
| R22 22123456.789 23456.789 5                                                        |  |  |  |  |  |  |  |  |  |
| E11 65432.123 5 48861.586 7                                                         |  |  |  |  |  |  |  |  |  |
| S20 38137559.506 335849.135 9                                                       |  |  |  |  |  |  |  |  |  |
| > 2006 03 24 13 11 12.0000000 2 2                                                   |  |  |  |  |  |  |  |  |  |
| *** FROM NOW ON KINEMATIC DATA! *** COMMENT                                         |  |  |  |  |  |  |  |  |  |
| TWO COMMENT LINES FOLLOW DIRECTLY THE EVENT RECORD COMMENT                          |  |  |  |  |  |  |  |  |  |
| > 2006 3 24 13 11 12.0000000 0 4 -0.123456789876                                    |  |  |  |  |  |  |  |  |  |
| G06 21110991.756 16119.980 7 12560.510 4 21110991.441 25.543                        |  |  |  |  |  |  |  |  |  |
| G09 23588424.398 -215050.557 6 -167571.734 6 23588424.570 41.824                    |  |  |  |  |  |  |  |  |  |
| G12 20869878.790 -113803.187 8 -88677.926 6 20869878.938 36.961                     |  |  |  |  |  |  |  |  |  |
| G16 20621643.727 73797.462 7 57505.177 2 20621644.276 15.368                        |  |  |  |  |  |  |  |  |  |
| > 3 4                                                                               |  |  |  |  |  |  |  |  |  |
| A 9081 MARKER NAME                                                                  |  |  |  |  |  |  |  |  |  |

```

9081.1.34
      .9050      .0000      .0000
      --> THIS IS THE START OF A NEW SITE <--
> 2006 03 24 13 12 6.0000000 0 4      -0.123456987654
G06 21112589.384      24515.877 6      19102.763 4 21112589.187      25.478
G09 23578228.338      -268624.234 7      -209317.284 6 23578228.398      41.725
G12 20625218.088      92581.207 7      72141.846 5 20625218.795      35.143
G16 20864539.693      -141858.836 8      -110539.435 2 20864539.943      16.345
> 2006 03 24 13 13 1.2345678 5 0
>
      4 2
      AN EVENT FLAG 5 WITH A SIGNIFICANT EPOCH
      AND AN EVENT FLAG 4 TO ESCAPE FOR THE TWO COMMENT LINES
> 2006 03 24 13 14 12.0000000 0 4      -0.123456012345
G06 21124965.133      0.30213      -0.62614 21124965.275      27.528
G09 23507272.372      -212616.150 7      -165674.789 7 23507272.421      42.124
G12 20828010.354      -333820.093 6      -260119.395 6 20828010.129      37.002
G16 20650944.902      227775.130 7      177487.651 3 20650944.363      18.040
>
      4 1
      *** LOST LOCK ON G 06
      .
      .
      .
>
      4 1
END OF FILE
-----|---1|0---|---2|0---|---3|0---|---4|0---|---5|0---|---6|0---|---7|0---|---8|0-

```

### A 5 GNSS Navigation Message File – Header Section Description

| <b>TABLE A5</b><br><b>GNSS NAVIGATION MESSAGE FILE - HEADER SECTION DESCRIPTION</b> |                                                                                                                                                                                                                                                                                                                                                                                                                                                                         |                                    |
|-------------------------------------------------------------------------------------|-------------------------------------------------------------------------------------------------------------------------------------------------------------------------------------------------------------------------------------------------------------------------------------------------------------------------------------------------------------------------------------------------------------------------------------------------------------------------|------------------------------------|
| <b>HEADER LABEL</b><br>(Columns 61-80)                                              | <b>DESCRIPTION</b>                                                                                                                                                                                                                                                                                                                                                                                                                                                      | <b>FORMAT</b>                      |
| <b>RINEX VERSION / TYPE</b>                                                         | - Format version : <b>3.02</b><br>File type ('N' for navigation data)<br>Satellite System:<br><b>G</b> : GPS<br><b>R</b> : GLONASS<br><b>E</b> : Galileo<br><b>J</b> : QZSS<br><b>C</b> : BDS<br><b>S</b> : SBAS Payload<br><b>M</b> : Mixed                                                                                                                                                                                                                            | F9.2,11X,<br>A1,19X,<br><br>A1,19X |
| <b>PGM / RUN BY / DATE</b>                                                          | Name of program creating current file<br>Name of agency creating current file<br>Date and time of file creation<br>Format: yyymmdd hhmmss zone zone: 3-4 char.<br>code for time zone.<br>'UTC ' recommended!<br>'LCL ' if local time with unknown local time system code                                                                                                                                                                                                | A20,<br>A20,<br><br>A20            |
| <b>* COMMENT</b>                                                                    | Comment line(s)                                                                                                                                                                                                                                                                                                                                                                                                                                                         | A60                                |
| <b>* IONOSPHERIC CORR</b>                                                           | Ionospheric correction parameters<br>Correction type<br><b>GAL</b> = Galileo ai0 – ai2<br><b>GPSA</b> = GPS alpha0 - alpha3<br><b>GPSB</b> = GPS beta0 - beta3<br><b>QZSA</b> = QZS alpha0 - alpha3<br><b>QZSB</b> = QZS beta0 - beta3<br><b>BDSA</b> = BDS alpha0 - alpha3<br><b>BDSB</b> = BDS beta0 - beta3<br>Parameters<br>GPS: alpha0-alpha3 or beta0-beta3<br>GAL: ai0, ai1, ai2, zero<br>QZS: alpha0-alpha3 or beta0-beta3<br>BDS: alpha0-alpha3 or beta0-beta3 | A4,1X,<br><br><br>4D12.4           |
| <b>* TIME SYSTEM CORR</b>                                                           | Corrections to transform the system time to UTC or other time systems<br>Correction type<br><b>GAUT</b> = GAL to UTC a0, a1<br><b>GPOT</b> = GPS to UTC a0, a1                                                                                                                                                                                                                                                                                                          | A4,1X,                             |

| <b>TABLE A5</b><br><b>GNSS NAVIGATION MESSAGE FILE - HEADER SECTION DESCRIPTION</b> |                                                                                                                                                                                                                                                                                                                                                                                                                                                                                                                                                                                                                                                                                                                                                                                                                                                                                                                                                         |                                                                          |
|-------------------------------------------------------------------------------------|---------------------------------------------------------------------------------------------------------------------------------------------------------------------------------------------------------------------------------------------------------------------------------------------------------------------------------------------------------------------------------------------------------------------------------------------------------------------------------------------------------------------------------------------------------------------------------------------------------------------------------------------------------------------------------------------------------------------------------------------------------------------------------------------------------------------------------------------------------------------------------------------------------------------------------------------------------|--------------------------------------------------------------------------|
| <b>HEADER LABEL</b><br>(Columns 61-80)                                              | <b>DESCRIPTION</b>                                                                                                                                                                                                                                                                                                                                                                                                                                                                                                                                                                                                                                                                                                                                                                                                                                                                                                                                      | <b>FORMAT</b>                                                            |
|                                                                                     | <b>SBUT</b> = SBAS to UTC a0, a1<br><b>GLUT</b> = GLO to UTC a0=TauC, a1=zero<br><b>GPGA</b> = GPS to GAL a0=A0G, a1=A1G<br><b>GLGP</b> = GLO to GPS a0=TauGPS, a1=zero<br><b>QZGP</b> = QZS to GPS a0, a1<br><b>QZUT</b> = QZS to UTC a0, a1<br><b>BDUT</b> =BDS to UTC a0=A <sub>0UTC</sub> , a1=A <sub>1UTC</sub><br><br>a0,a1 Coefficients of 1-deg polynomial (a0 sec, a1 sec/sec) CORR(s) = a0 + a1*DELTAT<br>T Reference time for polynomial (Seconds into GPS/GAL week)<br>W Reference week number (GPS/GAL week, continuous number) T and W zero for GLONASS.<br><b>S EGNOS, WAAS, or MSAS</b> ... (left-justified) Derived from MT17 service provider. If not known: Use <b>Snn</b> with:<br>nn = PRN-100 of satellite broadcasting the MT12<br><br>U UTC Identifier (0 if unknown)<br>1=UTC(NIST), 2=UTC(USNO), 3=UTC(SU),<br>4=UTC(BIPM), 5=UTC(Europe Lab), 6=UTC(CRL),<br>7=UTC(NTSC) (BDS), >7 = not assigned yet S and U for SBAS only. | D17.10,<br>D16.9,<br><br>I7,<br><br>I5,<br><br>1X,A5,1X<br><br><br>I2,1X |
| <b>* LEAP SECONDS</b>                                                               | Number of leap seconds since 6-Jan-1980 as transmitted by the GPS almanac or since 1-Jan-2006 as transmitted by BDS almanac <b>_t_LS</b> ,<br>Future or past leap seconds <b>_t_LSF</b><br>Respective week number <b>WN_LSF</b> (continuous number)<br>Respective day number <b>DN</b> (see ICD-GPS-200C 20.3.3.5.2.4)<br>Zero or blank if not known                                                                                                                                                                                                                                                                                                                                                                                                                                                                                                                                                                                                    | I6,<br><br>I6,<br>I6,<br><br>I6                                          |
| <b>END OF HEADER</b>                                                                | Last record in the header section.                                                                                                                                                                                                                                                                                                                                                                                                                                                                                                                                                                                                                                                                                                                                                                                                                                                                                                                      | 60X                                                                      |

Records marked with \* are optional

### A 6 GNSS Navigation Message File – GPS Data Record Description

| TABLE A6<br>GNSS NAVIGATION MESSAGE FILE – GPS/QZSS DATA RECORD DESCRIPTION |                                                                                                                                                                                                                                                                                                                                                   |                                                            |
|-----------------------------------------------------------------------------|---------------------------------------------------------------------------------------------------------------------------------------------------------------------------------------------------------------------------------------------------------------------------------------------------------------------------------------------------|------------------------------------------------------------|
| OBS. RECORD                                                                 | DESCRIPTION                                                                                                                                                                                                                                                                                                                                       | FORMAT                                                     |
| <i>SV / EPOCH / SV CLK</i>                                                  | <ul style="list-style-type: none"> <li>- Satellite system (G/J), sat number (PRN, (QZSS: PRN-192))</li> <li>- Epoch: Toc - Time of Clock (GPS) year (4 digits)</li> <li>- month, day, hour, minute, second</li> <li>- SV clock bias (seconds)</li> <li>- SV clock drift (sec/sec)</li> <li>- SV clock drift rate (sec/sec<sup>2</sup>)</li> </ul> | A1,I2.2,<br><br>1X,I4,<br>5(1X,I2.2),<br>3D19.12<br><br>*) |
| <b>BROADCAST ORBIT - 1</b>                                                  | <ul style="list-style-type: none"> <li>- IODE Issue of Data, Ephemeris</li> <li>- Crs (meters)</li> <li>- Delta n (radians/sec)</li> <li>- M0 (radians)</li> </ul>                                                                                                                                                                                | 4X,4D19.12<br><br>***)                                     |
| <b>BROADCAST ORBIT - 2</b>                                                  | <ul style="list-style-type: none"> <li>- Cuc (radians)</li> <li>- e Eccentricity</li> <li>- Cus (radians)</li> <li>- sqrt(A) (sqrt(m))</li> </ul>                                                                                                                                                                                                 | 4X,4D19.12                                                 |
| <b>BROADCAST ORBIT - 3</b>                                                  | <ul style="list-style-type: none"> <li>- Toe Time of Ephemeris (sec of GPS week)</li> <li>- Cic (radians)</li> <li>- OMEGA0 (radians)</li> <li>- Cis (radians)</li> </ul>                                                                                                                                                                         | 4X,4D19.12                                                 |
| <b>BROADCAST ORBIT - 4</b>                                                  | <ul style="list-style-type: none"> <li>- i0 (radians)</li> <li>- Crc (meters)</li> <li>- omega (radians)</li> <li>- OMEGA DOT (radians/sec)</li> </ul>                                                                                                                                                                                            | 4X,4D19.12                                                 |
| <b>BROADCAST ORBIT - 5</b>                                                  | <ul style="list-style-type: none"> <li>- IDOT (radians/sec)</li> <li>- Codes on L2 channel</li> <li>- GPS Week # (to go with TOE)</li> <li>- Continuous number, not mod(1024)!</li> <li>- L2 P data flag</li> </ul>                                                                                                                               | 4X,4D19.12                                                 |
| <b>BROADCAST ORBIT - 6</b>                                                  | <ul style="list-style-type: none"> <li>- SV accuracy (meters)</li> <li>- SV health (bits 17-22 w 3 sf 1)</li> <li>- TGD (seconds)</li> <li>- IODC Issue of Data, Clock</li> </ul>                                                                                                                                                                 | 4X,4D19.12                                                 |
| <b>BROADCAST ORBIT - 7</b>                                                  | <ul style="list-style-type: none"> <li>- Transmission time of message **) (sec of GPS week, derived e.g. from Z-count in Hand Over Word (HOW))</li> <li>- Fit interval (hours) (see ICD-GPS-200, 20.3.4.4) 0 = 4 hours, 1 = 6 hours</li> <li>- Spare</li> <li>- Spare</li> </ul>                                                                  | 4X,4D19.12                                                 |

\*) In order to account for the various compilers, E,e,D, and d are allowed letters between the



fraction and exponent of all floating point numbers in the navigation message files. Zero-padded two-digit exponents are required, however.

\*\*) Adjust the *Transmission time of message* by + or -604800 to refer to the reported week in **BROADCAST ORBIT 5**, if necessary. Set value to 0.9999E9 if not known.

### A 7 GPS Navigation Message File – Example

| TABLE A7                                                                         |  |                     |                    |                     |                    |                      |  |  |  |
|----------------------------------------------------------------------------------|--|---------------------|--------------------|---------------------|--------------------|----------------------|--|--|--|
| GPS NAVIGATION MESSAGE FILE - EXAMPLE                                            |  |                     |                    |                     |                    |                      |  |  |  |
| ----- ---1 0--- ---2 0--- ---3 0--- ---4 0--- ---5 0--- ---6 0--- ---7 0--- ---8 |  |                     |                    |                     |                    |                      |  |  |  |
| 3.02                                                                             |  | N: GNSS NAV DATA    |                    | G: GPS              |                    | RINEX VERSION / TYPE |  |  |  |
| XXRINEXN V3                                                                      |  | AIUB                |                    | 19990903 152236 UTC |                    | PGM / RUN BY / DATE  |  |  |  |
| EXAMPLE OF VERSION 3.02 FORMAT                                                   |  |                     |                    |                     |                    | COMMENT              |  |  |  |
| GPSA                                                                             |  | .1676D-07           | .2235D-07          | .1192D-06           | .1192D-06          | IONOSPHERIC CORR     |  |  |  |
| GPSB                                                                             |  | .1208D+06           | .1310D+06          | -.1310D+06          | -.1966D+06         | IONOSPHERIC CORR     |  |  |  |
| GPWT                                                                             |  | .1331791282D-06     | .107469589D-12     | 552960              | 1025               | TIME SYSTEM CORR     |  |  |  |
| 13                                                                               |  |                     |                    |                     |                    | LEAP SECONDS         |  |  |  |
|                                                                                  |  |                     |                    |                     |                    | END OF HEADER        |  |  |  |
| G06                                                                              |  | 1999 09 02 17 51 44 | -.839701388031D-03 | -.165982783074D-10  | .000000000000D+00  |                      |  |  |  |
|                                                                                  |  | .910000000000D+02   | .934062500000D+02  | .116040547840D-08   | .162092304801D+00  |                      |  |  |  |
|                                                                                  |  | .484101474285D-05   | .626740418375D-02  | .652112066746D-05   | .515365489006D+04  |                      |  |  |  |
|                                                                                  |  | .409904000000D+06   | -.242143869400D-07 | .329237003460D+00   | -.596046447754D-07 |                      |  |  |  |
|                                                                                  |  | .111541663136D+01   | .326593750000D+03  | .206958726335D+01   | -.638312302555D-08 |                      |  |  |  |
|                                                                                  |  | .307155651409D-09   | .000000000000D+00  | .102500000000D+04   | .000000000000D+00  |                      |  |  |  |
|                                                                                  |  | .000000000000D+00   | .000000000000D+00  | .000000000000D+00   | .910000000000D+02  |                      |  |  |  |
|                                                                                  |  | .406800000000D+06   | .000000000000D+00  |                     |                    |                      |  |  |  |
| G13                                                                              |  | 1999 09 02 19 00 00 | .490025617182D-03  | .204636307899D-11   | .000000000000D+00  |                      |  |  |  |
|                                                                                  |  | .133000000000D+03   | -.963125000000D+02 | .146970407622D-08   | .292961152146D+01  |                      |  |  |  |
|                                                                                  |  | -.498816370964D-05  | .200239347760D-02  | .928156077862D-05   | .515328476143D+04  |                      |  |  |  |
|                                                                                  |  | .414000000000D+06   | -.279396772385D-07 | .243031939942D+01   | -.558793544769D-07 |                      |  |  |  |
|                                                                                  |  | .110192796930D+01   | .271187500000D+03  | -.232757915425D+01  | -.619632953057D-08 |                      |  |  |  |
|                                                                                  |  | -.785747015231D-11  | .000000000000D+00  | .102500000000D+04   | .000000000000D+00  |                      |  |  |  |
|                                                                                  |  | .000000000000D+00   | .000000000000D+00  | .000000000000D+00   | .389000000000D+03  |                      |  |  |  |
|                                                                                  |  | .410400000000D+06   | .000000000000D+00  |                     |                    |                      |  |  |  |
| ----- ---1 0--- ---2 0--- ---3 0--- ---4 0--- ---5 0--- ---6 0--- ---7 0--- ---8 |  |                     |                    |                     |                    |                      |  |  |  |



| TABLE A8<br>GNSS NAVIGATION MESSAGE FILE - GALILEO DATA RECORD DESCRIPTION |                                                                                                                                                 |            |
|----------------------------------------------------------------------------|-------------------------------------------------------------------------------------------------------------------------------------------------|------------|
| OBS. RECORD                                                                | DESCRIPTION                                                                                                                                     | FORMAT     |
|                                                                            | Bit 3: E5a DVS<br>Bits 4-5: E5a HS<br>Bit 6: E5b DVS<br>Bits 7-8: E5b HS<br>- BGD E5a/E1 (seconds)<br>- BGD E5b/E1 (seconds)                    |            |
| <b>BROADCAST ORBIT - 7</b>                                                 | - Transmission time of message <sup>**) </sup><br>(sec of GAL week, derived from WN and<br>TOW of page type 1)<br>- spare<br>- spare<br>- spare | 4X,4D19.12 |

\*) In order to account for the various compilers, E,e,D, and d are allowed letters between the fraction and exponent of all floating point numbers in the navigation message files. Zero-padded two-digit exponents are required, however.

\*\*) Adjust the *Transmission time of message* by + or -604800 to refer to the reported week in **BROADCAST ORBIT 5**, if necessary. Set value to 0.9999E9 if not known.

\*\*\* ) Angles and their derivatives transmitted in units of semi-circles and semi-circles/sec have to be converted to radians by the RINEX generator.

\*\*\*\*) The GAL week number is a continuous number, aligned to (and hence identical to) the continuous GPS week number used in the RINEX navigation message files. The broadcast 12-bit Galileo System Time week has a roll-over after 4095. It started at zero at the first GPS roll-over (continuous GPS week 1024). Hence GAL week = GST week + 1024 + n\*4096 (n: number of GST roll-overs).

\*\*\*\*\*)

-If bit 0 or bit 2 of Data sources (**BROADCAST ORBIT - 5**) is set, E1B DVS & HS, E5b DVS & HS and both BGDs are valid. -If bit 1 of Data sources is set, E5a DVS & HS and BGD E5a/E1 are valid. -Non valid parameters are set to 0 and to be ignored

## A 9 GALILEO Navigation Message File – Example

| TABLE A9<br>GALILEO NAVIGATION MESSAGE FILE - EXAMPLE                            |  |                  |  |  |  |                     |  |  |  |                      |  |  |  |  |  |  |
|----------------------------------------------------------------------------------|--|------------------|--|--|--|---------------------|--|--|--|----------------------|--|--|--|--|--|--|
| ----- ---1 0--- ---2 0--- ---3 0--- ---4 0--- ---5 0--- ---6 0--- ---7 0--- ---8 |  |                  |  |  |  |                     |  |  |  |                      |  |  |  |  |  |  |
| 3.02                                                                             |  | N: GNSS NAV DATA |  |  |  | E: GALILEO          |  |  |  | RINEX VERSION / TYPE |  |  |  |  |  |  |
| XXRINEXN V3                                                                      |  | AIUB             |  |  |  | 20060902 192236 UTC |  |  |  | PGM / RUN BY / DATE  |  |  |  |  |  |  |
| EXAMPLE OF VERSION 3.02 FORMAT                                                   |  |                  |  |  |  |                     |  |  |  | COMMENT              |  |  |  |  |  |  |
| To be supplied later                                                             |  |                  |  |  |  |                     |  |  |  |                      |  |  |  |  |  |  |
| ----- ---1 0--- ---2 0--- ---3 0--- ---4 0--- ---5 0--- ---6 0--- ---7 0--- ---8 |  |                  |  |  |  |                     |  |  |  |                      |  |  |  |  |  |  |

### A 10 GNSS Navigation Message File – GLONASS Data Record Description

| TABLE A10<br>GNSS NAVIGATION MESSAGE FILE – GLONASS DATA RECORD DESCRIPTION |                                                                                                                                                                                                                                                                                                                                                                                                      |                                                            |
|-----------------------------------------------------------------------------|------------------------------------------------------------------------------------------------------------------------------------------------------------------------------------------------------------------------------------------------------------------------------------------------------------------------------------------------------------------------------------------------------|------------------------------------------------------------|
| OBS. RECORD                                                                 | DESCRIPTION                                                                                                                                                                                                                                                                                                                                                                                          | FORMAT                                                     |
| <i>SV / EPOCH / SV<br/>CLK</i>                                              | <ul style="list-style-type: none"> <li>- Satellite system (R), satellite number (slot number in sat. constellation)</li> <li>- Epoch: Toc - Time of Clock (UTC) year (4 digits)</li> <li>- month, day, hour, minute, second</li> <li>- SV clock bias (sec) (-TauN)</li> <li>- SV relative frequency bias (+GammaN)</li> <li>- Message frame time (tk+nd*86400) in seconds of the UTC week</li> </ul> | A1,I2.2,<br><br>1X,I4,<br>5(1X,I2.2),<br>3D19.12<br><br>*) |
| <b>BROADCAST ORBIT - 1</b>                                                  | <ul style="list-style-type: none"> <li>- Satellite position X (km)</li> <li>- velocity X dot (km/sec)</li> <li>- X acceleration (km/sec<sup>2</sup>)</li> <li>- health (0=OK) (Bn)</li> </ul>                                                                                                                                                                                                        | 4X,4D19.12                                                 |
| <b>BROADCAST ORBIT - 2</b>                                                  | <ul style="list-style-type: none"> <li>- Satellite position Y (km)</li> <li>- velocity Y dot (km/sec)</li> <li>- Y acceleration (km/sec<sup>2</sup>)</li> <li>- frequency number(-7...+13) (-7...+6 ICD 5.1)</li> </ul>                                                                                                                                                                              | 4X,4D19.12                                                 |
| <b>BROADCAST ORBIT - 3</b>                                                  | <ul style="list-style-type: none"> <li>- Satellite position Z (km)</li> <li>- velocity Z dot (km/sec)</li> <li>- Z acceleration (km/sec<sup>2</sup>)</li> <li>- Age of oper. information (days) (E)</li> </ul>                                                                                                                                                                                       | 4X,4D19.12                                                 |

\*) In order to account for the various compilers, E,e,D, and d are allowed letters between the fraction and exponent of all floating point numbers in the navigation message files. Zero-padded two-digit exponents are required, however.

## A 11 GNSS Navigation Message File – Example: Mixed GPS / GLONASS

| TABLE A11                                                                        |                     |                     |                     |                     |                     |                     |                      |                     |                     |
|----------------------------------------------------------------------------------|---------------------|---------------------|---------------------|---------------------|---------------------|---------------------|----------------------|---------------------|---------------------|
| GNSS NAVIGATION MESSAGE FILE - EXAMPLE MIXED GPS/GLONASS                         |                     |                     |                     |                     |                     |                     |                      |                     |                     |
| ----- ---1 0--- ---2 0--- ---3 0--- ---4 0--- ---5 0--- ---6 0--- ---7 0--- ---8 |                     |                     |                     |                     |                     |                     |                      |                     |                     |
| 3.02                                                                             |                     | N: GNSS NAV DATA    |                     |                     | M: MIXED            |                     | RINEX VERSION / TYPE |                     |                     |
| XXRINEXN V3                                                                      |                     | AIUB                |                     |                     | 20061002 000123 UTC |                     | PGM / RUN BY / DATE  |                     |                     |
| EXAMPLE OF VERSION 3.02 FORMAT                                                   |                     |                     |                     |                     |                     |                     | COMMENT              |                     |                     |
| GPSA                                                                             | 0.1025E-07          | 0.7451E-08          | -0.5960E-07         | -0.5960E-07         | IONOSPHERIC CORR    |                     |                      |                     |                     |
| GPSB                                                                             | 0.8806E+05          | 0.0000E+00          | -0.1966E+06         | -0.6554E+05         | IONOSPHERIC CORR    |                     |                      |                     |                     |
| GPUT                                                                             | 0.2793967723E-08    | 0.000000000E+00     | 147456              | 1395                | TIME SYSTEM CORR    |                     |                      |                     |                     |
| GLUT                                                                             | 0.7823109626E-06    | 0.000000000E+00     | 0                   | 1395                | TIME SYSTEM CORR    |                     |                      |                     |                     |
| 14                                                                               |                     |                     |                     |                     | LEAP SECONDS        |                     |                      |                     |                     |
|                                                                                  |                     |                     |                     |                     | END OF HEADER       |                     |                      |                     |                     |
| G01                                                                              | 2006 10 01 00 00 00 | 0.798045657575E-04  | 0.227373675443E-11  | 0.000000000000E+00  | 0.560000000000E+02  | -0.787500000000E+01 | 0.375658504827E-08   | 0.265129935612E+01  | -0.411644577980E-06 |
|                                                                                  |                     | 0.640150101390E-02  | 0.381097197533E-05  | 0.515371852875E+04  | 0.000000000000E+00  | 0.782310962677E-07  | 0.188667086536E+00   | -0.391155481338E-07 | 0.989010441512E+00  |
|                                                                                  |                     | 0.320093750000E+03  | -0.178449589759E+01 | -0.775925177541E-08 | 0.828605943335E-10  | 0.000000000000E+00  | 0.139500000000E+04   | 0.000000000000E+00  | 0.200000000000E+01  |
|                                                                                  |                     | 0.000000000000E+00  | -0.325962901115E-08 | 0.560000000000E+02  | -0.600000000000E+02 | 0.400000000000E+01  |                      |                     |                     |
| G02                                                                              | 2006 10 01 00 00 00 | 0.402340665460E-04  | 0.386535248253E-11  | 0.000000000000E+00  | 0.135000000000E+03  | 0.467500000000E+02  | 0.478269921862E-08   | -0.238713891022E+01 | 0.250712037086E-05  |
|                                                                                  |                     | 0.876975362189E-02  | 0.819191336632E-05  | 0.515372778320E+04  | 0.000000000000E+00  | -0.260770320892E-07 | -0.195156738598E+01  | 0.128522515297E-06  | 0.948630520258E+00  |
|                                                                                  |                     | 0.214312500000E+03  | 0.215165003775E+01  | -0.794140221985E-08 | -0.437875382124E-09 | 0.000000000000E+00  | 0.139500000000E+04   | 0.000000000000E+00  | 0.200000000000E+01  |
|                                                                                  |                     | 0.000000000000E+00  | -0.172294676304E-07 | 0.391000000000E+03  | -0.600000000000E+02 | 0.400000000000E+01  |                      |                     |                     |
| R01                                                                              | 2006 10 01 00 15 00 | -0.137668102980E-04 | -0.454747350886E-11 | 0.900000000000E+02  | 0.157594921875E+05  | -0.145566368103E+01 | 0.000000000000E+00   | 0.000000000000E+00  | -0.813711474609E+04 |
|                                                                                  |                     | 0.205006790161E+01  | 0.931322574615E-09  | 0.700000000000E+01  | 0.183413398438E+05  | 0.215388488770E+01  | -0.186264514923E-08  | 0.100000000000E+01  | 0.183413398438E+05  |
| R02                                                                              | 2006 10 01 00 15 00 | -0.506537035108E-04 | 0.181898940355E-11  | 0.300000000000E+02  | 0.155536342773E+05  | -0.419384956360E+00 | 0.000000000000E+00   | 0.000000000000E+00  | -0.199011298828E+05 |
|                                                                                  |                     | 0.324192047119E+00  | -0.931322574615E-09 | 0.100000000000E+01  | 0.355333544922E+04  | 0.352666091919E+01  | -0.186264514923E-08  | 0.100000000000E+01  | -0.355333544922E+04 |
| ----- ---1 0--- ---2 0--- ---3 0--- ---4 0--- ---5 0--- ---6 0--- ---7 0--- ---8 |                     |                     |                     |                     |                     |                     |                      |                     |                     |

**A 12 GNSS Navigation Message File – QZSS Data Record Description**

| <b>TABLE A12</b><br><b>QZSS NAVIGATION MESSAGE FILE – QZSS DATA RECORD DESCRIPTION</b> |                                                                                                                                                                                                                                                                                                                                                                                                                    |                                                                                              |
|----------------------------------------------------------------------------------------|--------------------------------------------------------------------------------------------------------------------------------------------------------------------------------------------------------------------------------------------------------------------------------------------------------------------------------------------------------------------------------------------------------------------|----------------------------------------------------------------------------------------------|
| <b>OBS. RECORD</b><br>(Columns 61-80)                                                  | <b>DESCRIPTION</b>                                                                                                                                                                                                                                                                                                                                                                                                 | <b>FORMAT</b>                                                                                |
| <b>PRN / EPOCH / SV CLK</b>                                                            | <ul style="list-style-type: none"> <li>- Satellite system (J), Satellite PRN-192</li> <li>- Epoch: Toc - Time of Clock year (2 digits, padded with 0 if necessary)</li> <li>month</li> <li>day</li> <li>hour</li> <li>minutes</li> <li>seconds <ul style="list-style-type: none"> <li>– SV clock bias (seconds)</li> <li>– SV clock drift (sec/sec)</li> <li>SV clock drift rate (sec/sec2)</li> </ul> </li> </ul> | A1,I2,<br><br>1X,I2.2,<br>1X,I2,<br>1X,I2,<br>1X,I2,<br>1X,I2,<br>F5.1,<br>3D19.12<br><br>*) |
| <b>BROADCAST ORBIT - 1</b>                                                             | <ul style="list-style-type: none"> <li>– IODE Issue of Data, Ephemeris</li> <li>– Crs (meters)</li> <li>– Delta n (radians/sec)</li> <li>– M0 (radians)</li> </ul>                                                                                                                                                                                                                                                 | 4X,4D19.12                                                                                   |
| <b>BROADCAST ORBIT - 2</b>                                                             | <ul style="list-style-type: none"> <li>– Cuc (radians)</li> <li>– e Eccentricity</li> <li>– Cus (radians)</li> <li>– sqrt(A) (sqrt(m))</li> </ul>                                                                                                                                                                                                                                                                  | 4X,4D19.12                                                                                   |
| <b>BROADCAST ORBIT - 3</b>                                                             | <ul style="list-style-type: none"> <li>– Toe Time of Ephemeris (sec of GPS week)</li> <li>– Cic (radians)</li> <li>– OMEGA (radians)</li> <li>– CIS (radians)</li> </ul>                                                                                                                                                                                                                                           | 4X,4D19.12                                                                                   |
| <b>BROADCAST ORBIT - 4</b>                                                             | <ul style="list-style-type: none"> <li>– i0 (radians)</li> <li>– Crc (meters)</li> <li>– omega (radians)</li> <li>– OMEGA DOT (radians/sec)</li> </ul>                                                                                                                                                                                                                                                             | 4X,4D19.12                                                                                   |
| <b>BROADCAST ORBIT – 5</b>                                                             | <ul style="list-style-type: none"> <li>– IDOT (radians/sec)</li> <li>– Codes on L2 channel (see IS-QZSS 5.2.2.2.3(2))</li> <li>– GPS Week # (to go with TOE)<br/>Continuous number, not mod(1024)!</li> <li>spare</li> </ul>                                                                                                                                                                                       | 4X,4D19.12                                                                                   |
| <b>BROADCAST ORBIT – 6</b>                                                             | <ul style="list-style-type: none"> <li>– SV accuracy (meters) (see IS-GPS-200, 20.3.3.3.1.3)</li> <li>– SV health (bits 17-22 w 3 sf 1) (see IS-QZSS 5.2.2.2.3(4))</li> </ul>                                                                                                                                                                                                                                      | 4X,4D19.12                                                                                   |

| <b>TABLE A12</b><br><b>QZSS NAVIGATION MESSAGE FILE – QZSS DATA RECORD DESCRIPTION</b> |                                                                                                                                                                                                                                                                                                |               |
|----------------------------------------------------------------------------------------|------------------------------------------------------------------------------------------------------------------------------------------------------------------------------------------------------------------------------------------------------------------------------------------------|---------------|
| <b>OBS. RECORD</b><br>(Columns 61-80)                                                  | <b>DESCRIPTION</b>                                                                                                                                                                                                                                                                             | <b>FORMAT</b> |
|                                                                                        | <ul style="list-style-type: none"> <li>– TGD (seconds)</li> <li>– IODC Issue of Data, Clock</li> </ul>                                                                                                                                                                                         |               |
| <b>BROADCAST ORBIT – 7</b>                                                             | <ul style="list-style-type: none"> <li>- Transmission time of message **) (sec of GPS week, derived e.g. from Z-count in Hand Over Word (HOW))</li> <li>- Fit interval (hours) (see IS-QZSS, 5.2.2.2.4(4)) Zero – one hour, 1 – more than 2 hours</li> <li>- Spare</li> <li>- Spare</li> </ul> | 4X,4D19.12    |
|                                                                                        |                                                                                                                                                                                                                                                                                                |               |

Records marked with \* are optional

\*\*)Adjust the Transmission time of message by -604800 to refer to the reported week, if necessary.

\*) In order to account for the various compilers, letters E,e,D, and d are allowed between the fraction and exponent of all floating point numbers in the navigation message files. However, zero-padded two-digit exponents are required.



### A 13 GNSS Navigation Message File – BDS Data Record Description

| <b>Table A13</b><br><b>GNSS NAVIGATION MESSAGE FILE – BDS DATA RECORD DESCRIPTION</b> |                                                                                                                                                                                                                                                                                                                                |                                                      |
|---------------------------------------------------------------------------------------|--------------------------------------------------------------------------------------------------------------------------------------------------------------------------------------------------------------------------------------------------------------------------------------------------------------------------------|------------------------------------------------------|
| <b>OBS. RECORD</b>                                                                    | <b>DESCRIPTION</b>                                                                                                                                                                                                                                                                                                             | <b>FORMAT</b>                                        |
| SV /EPOCH / SV CLK                                                                    | <ul style="list-style-type: none"> <li>- Satellite system (C), sat number (PRN)</li> <li>- Epoch: Toc - Time of Clock (BDT) year (4 digits)</li> <li>- month, day, hour, minute, second</li> <li>- SV clock bias (seconds)</li> <li>- SV clock drift (sec/sec)</li> <li>- SV clock drift rate (sec/sec<sup>2</sup>)</li> </ul> | A1,I2.2,<br>1X,I4<br><br>5,1X,I2.2,<br>3D19.12<br>*) |
| BROADCAST ORBIT – 1                                                                   | <ul style="list-style-type: none"> <li>- IODE Issue of Data, Ephemeris</li> <li>- Crs (meters)</li> <li>- Delta n (radians/sec)</li> <li>- M0 (radians)</li> </ul>                                                                                                                                                             | 4X,4D19.12<br><br>**)                                |
| BROADCAST ORBIT – 2                                                                   | <ul style="list-style-type: none"> <li>- Cuc (radians)</li> <li>- e Eccentricity</li> <li>- Cus (radians)</li> <li>- sqrt(A) (sqrt(m))</li> </ul>                                                                                                                                                                              | 4X,4D19.12                                           |
| BROADCAST ORBIT – 3                                                                   | <ul style="list-style-type: none"> <li>- Toe Time of Ephemeris (sec of BDT week)</li> <li>- Cic (radians)</li> <li>- OMEGA0 (radians)</li> <li>- -Cis (radians)</li> </ul>                                                                                                                                                     | 4X,4D19.12                                           |
| BROADCAST ORBIT – 4                                                                   | <ul style="list-style-type: none"> <li>- i0 (radians)</li> <li>- Crc (meters)</li> <li>- omega (radians)</li> <li>- OMEGA DOT (radians/sec)</li> </ul>                                                                                                                                                                         | 4X,4D19.12                                           |
| BROADCAST ORBIT – 5                                                                   | <ul style="list-style-type: none"> <li>- IDOT (radians/sec)</li> <li>- Spare</li> <li>- BDT Week #</li> <li>- Spare</li> </ul>                                                                                                                                                                                                 | 4X,4D19.12<br><br>***)                               |
| BROADCAST ORBIT – 6                                                                   | <ul style="list-style-type: none"> <li>- SV accuracy (meters)</li> <li>- SatH1</li> <li>- TGD1 B1/B3 (seconds)</li> <li>- TGD2 B2/B3 (seconds)</li> </ul>                                                                                                                                                                      | 4X,4D19.12                                           |
| BROADCAST ORBIT – 7                                                                   | <ul style="list-style-type: none"> <li>- Transmission time of message ****) (sec of BDT week,)</li> <li>- IODC Issue of Data Clock</li> <li>- Spare</li> <li>- Spare</li> </ul>                                                                                                                                                | 4X,4D19.12                                           |

\*) In order to account for the various compilers, E,e,D, and d are allowed letters between the fraction and exponent of all floating point numbers in the navigation message files. Zero-padded two-digit exponents

are required, however.

\*\*) Angles and their derivatives transmitted in units of semi-circles and semi-circles/sec have to be converted to radians by the RINEX generator.

\*\*) The BDT week number is a continuous number. The broadcast 13-bit BDS System Time week has a roll-over after 8191. It started at zero at 1-Jan-2006, Hence  $\text{BDT week} = \text{BDT week\_BRD} + (n * 8192)$  where (n: number of BDT roll-overs).

\*\*\*\*) Adjust the Transmission time of message by + or -604800 to refer to the reported week in BROADCAST ORBIT -5, if necessary. Set value to 0.9999E9 if not known.

### A 14 GNSS Navigation Message File – SBAS Data Record Description

| <b>TABLE A14</b><br><b>GNSS NAVIGATION MESSAGE FILE – SBAS/QZSS L1 SAIF DATA RECORD</b><br><b>DESCRIPTION</b> |                                                                                                                                                                                                                                                                                                                                                                                                                     |                                                             |
|---------------------------------------------------------------------------------------------------------------|---------------------------------------------------------------------------------------------------------------------------------------------------------------------------------------------------------------------------------------------------------------------------------------------------------------------------------------------------------------------------------------------------------------------|-------------------------------------------------------------|
| <b>OBS. RECORD</b>                                                                                            | <b>DESCRIPTION</b>                                                                                                                                                                                                                                                                                                                                                                                                  | <b>FORMAT</b>                                               |
| <b>SV / EPOCH / SV CLK</b>                                                                                    | <ul style="list-style-type: none"> <li>- Satellite system (S), satellite number (slot number in sat. constellation)</li> <li>- Epoch: Toc - Time of Clock (GPS) year (4 digits)</li> <li>- month, day, hour, minute, second</li> <li>- SV clock bias (sec) (aGf0)</li> <li>- SV relative frequency bias (aGf1)</li> <li>- Transmission time of message (start of the message) in GPS seconds of the week</li> </ul> | A1,I2.2,<br><br>1X,I4,<br>5(1X,I2.2),<br>3D19.12,<br><br>*) |
| <b>BROADCAST ORBIT - 1</b>                                                                                    | <ul style="list-style-type: none"> <li>- Satellite position X (km)</li> <li>- velocity X dot (km/sec)</li> <li>- X acceleration (km/sec2)</li> <li>- health (0=OK)</li> </ul>                                                                                                                                                                                                                                       | 4X,4D19.12                                                  |
| <b>BROADCAST ORBIT - 2</b>                                                                                    | <ul style="list-style-type: none"> <li>- Satellite position Y (km)</li> <li>- velocity Y dot (km/sec)</li> <li>- Y acceleration (km/sec2)</li> <li>- Accuracy code (URA, meters)</li> </ul>                                                                                                                                                                                                                         | 4X,4D19.12                                                  |
| <b>BROADCAST ORBIT - 3</b>                                                                                    | <ul style="list-style-type: none"> <li>- Satellite position Z (km)</li> <li>- velocity Z dot (km/sec)</li> <li>- Z acceleration (km/sec2)</li> <li>- IODN (Issue of Data Navigation, DO229, 8 first bits after Message Type if MT9)</li> </ul>                                                                                                                                                                      | 4X,4D19.12                                                  |
|                                                                                                               |                                                                                                                                                                                                                                                                                                                                                                                                                     |                                                             |

\*) In order to account for the various compilers, E,e,D, and d are allowed letters between the fraction and exponent of all floating point numbers in the navigation message files. Zero-padded two-digit exponents are required, however.

For QZSS L1-SAIF, note that accelerations represent only lunar and solar perturbation terms and satellite position can be computed based on equations in Section A.3.1.2 of GLONASS ICD version 5.0.

## A 15 SBAS Navigation Message File -Example

| TABLE A15                                                                        |                      |                     |                      |                    |  |  |  |  |  |
|----------------------------------------------------------------------------------|----------------------|---------------------|----------------------|--------------------|--|--|--|--|--|
| SBAS NAVIGATION MESSAGE FILE - EXAMPLE                                           |                      |                     |                      |                    |  |  |  |  |  |
| ----- ---1 0--- ---2 0--- ---3 0--- ---4 0--- ---5 0--- ---6 0--- ---7 0--- ---8 |                      |                     |                      |                    |  |  |  |  |  |
| 3.02                                                                             | N: GNSS NAV DATA     | S: SBAS             | RINEX VERSION / TYPE |                    |  |  |  |  |  |
| SBAS2RINEX 3.0                                                                   | CNES                 | 20031018 140100     | PGM / RUN BY / DATE  |                    |  |  |  |  |  |
| EXAMPLE OF VERSION 3.02 FORMAT                                                   |                      |                     | COMMENT              |                    |  |  |  |  |  |
| SBUT -.1331791282D-06                                                            | -.107469589D-12      | 552960 1025 EGNOS   | 5                    | TIME SYSTEM CORR   |  |  |  |  |  |
| 13                                                                               |                      |                     |                      | LEAP SECONDS       |  |  |  |  |  |
| This file contains navigation message data from a SBAS                           |                      |                     | COMMENT              |                    |  |  |  |  |  |
| (geostationary) satellite, here AOR-W (PRN 122 = # S22)                          |                      |                     | COMMENT              |                    |  |  |  |  |  |
|                                                                                  |                      |                     | END OF HEADER        |                    |  |  |  |  |  |
| S22                                                                              | 2003 10 18 0 1 4-    | 1.005828380585D-07  | 6.366462912410D-12   | 5.184420000000D+05 |  |  |  |  |  |
|                                                                                  | 2.482832392000D+04-  | 3.593750000000D-04- | 1.375000000000D-07   | 0.000000000000D+00 |  |  |  |  |  |
|                                                                                  | -3.408920872000D+04- | 1.480625000000D-03- | 5.000000000000D-08   | 4.000000000000D+00 |  |  |  |  |  |
|                                                                                  | -1.650560000000D+01  | 8.360000000000D-04  | 6.250000000000D-08   | 2.300000000000D+01 |  |  |  |  |  |
| S22                                                                              | 2003 10 18 0 5 20-   | 9.872019290924D-08  | 5.456968210638D-12   | 5.186940000000D+05 |  |  |  |  |  |
|                                                                                  | 2.482822744000D+04-  | 3.962500000000D-04- | 1.375000000000D-07   | 0.000000000000D+00 |  |  |  |  |  |
|                                                                                  | -3.408958936000D+04- | 1.492500000000D-03- | 5.000000000000D-08   | 4.000000000000D+00 |  |  |  |  |  |
|                                                                                  | -1.628960000000D+01  | 8.520000000000D-04  | 6.250000000000D-08   | 2.400000000000D+01 |  |  |  |  |  |
| S22                                                                              | 2003 10 18 0 9 36-   | 9.732320904732D-08  | 4.547473508865D-12   | 5.189510000000D+05 |  |  |  |  |  |
|                                                                                  | 2.482812152000D+04-  | 4.325000000000D-04- | 1.375000000000D-07   | 0.000000000000D+00 |  |  |  |  |  |
|                                                                                  | -3.408997304000D+04- | 1.505000000000D-03- | 5.000000000000D-08   | 4.000000000000D+00 |  |  |  |  |  |
|                                                                                  | -1.606960000000D+01  | 8.800000000000D-04  | 6.250000000000D-08   | 2.500000000000D+01 |  |  |  |  |  |
| S22                                                                              | 2003 10 18 0 13 52-  | 9.592622518539D-08  | 4.547473508865D-12   | 5.192110000000D+05 |  |  |  |  |  |
|                                                                                  | 2.482800632000D+04-  | 4.681250000000D-04- | 1.375000000000D-07   | 0.000000000000D+00 |  |  |  |  |  |
|                                                                                  | -3.409035992000D+04- | 1.518125000000D-03- | 3.750000000000D-08   | 4.000000000000D+00 |  |  |  |  |  |
|                                                                                  | -1.584240000000D+01  | 8.960000000000D-04  | 6.250000000000D-08   | 2.600000000000D+01 |  |  |  |  |  |
| ----- ---1 0--- ---2 0--- ---3 0--- ---4 0--- ---5 0--- ---6 0--- ---7 0--- ---8 |                      |                     |                      |                    |  |  |  |  |  |

### A 16 Meteorological Data File -Header Section Description

| <b>TABLE A16</b><br><b>METEOROLOGICAL DATA FILE - HEADER SECTION DESCRIPTION</b> |                                                                                                                                                                                                                                                                                                                                                                                                                                                                                                                                                                                                                                                                                                                                                                                                                                                                                                                                                                                                                                                                                                                                                                     |                     |
|----------------------------------------------------------------------------------|---------------------------------------------------------------------------------------------------------------------------------------------------------------------------------------------------------------------------------------------------------------------------------------------------------------------------------------------------------------------------------------------------------------------------------------------------------------------------------------------------------------------------------------------------------------------------------------------------------------------------------------------------------------------------------------------------------------------------------------------------------------------------------------------------------------------------------------------------------------------------------------------------------------------------------------------------------------------------------------------------------------------------------------------------------------------------------------------------------------------------------------------------------------------|---------------------|
| <b>HEADER LABEL</b><br>(Columns 61-80)                                           | <b>DESCRIPTION</b>                                                                                                                                                                                                                                                                                                                                                                                                                                                                                                                                                                                                                                                                                                                                                                                                                                                                                                                                                                                                                                                                                                                                                  | <b>FORMAT</b>       |
| <b>RINEX VERSION / TYPE</b>                                                      | <ul style="list-style-type: none"> <li>- Format version : <b>3.02</b></li> <li>- File type: <b>M</b> for Meteorological Data</li> </ul>                                                                                                                                                                                                                                                                                                                                                                                                                                                                                                                                                                                                                                                                                                                                                                                                                                                                                                                                                                                                                             | F9.2,11X,<br>A1,39X |
| <b>PGM / RUN BY / DATE</b>                                                       | <ul style="list-style-type: none"> <li>- Name of program creating current file</li> <li>- Name of agency creating current file</li> <li>- Date of file creation (See section 5.8)</li> </ul>                                                                                                                                                                                                                                                                                                                                                                                                                                                                                                                                                                                                                                                                                                                                                                                                                                                                                                                                                                        | A20,<br>A20,<br>A20 |
| <b>* COMMENT</b>                                                                 | - Comment line(s)                                                                                                                                                                                                                                                                                                                                                                                                                                                                                                                                                                                                                                                                                                                                                                                                                                                                                                                                                                                                                                                                                                                                                   | A60                 |
| <b>MARKER NAME</b>                                                               | - Station Name (preferably identical to <b>MARKER NAME</b> in the associated Observation File)                                                                                                                                                                                                                                                                                                                                                                                                                                                                                                                                                                                                                                                                                                                                                                                                                                                                                                                                                                                                                                                                      | A60                 |
| <b>* MARKER NUMBER</b>                                                           | - Station Number (preferably identical to <b>MARKER NUMBER</b> in the associated Observation File)                                                                                                                                                                                                                                                                                                                                                                                                                                                                                                                                                                                                                                                                                                                                                                                                                                                                                                                                                                                                                                                                  | A20                 |
| <b># / TYPES OF OBSERV</b>                                                       | <ul style="list-style-type: none"> <li>- Number of different observation types stored in the file</li> <li>- Observation types               <ul style="list-style-type: none"> <li>- The following meteorological observation types are defined in RINEX Version 3:</li> <li>- <b>PR</b> : Pressure (mbar)</li> <li>- <b>TD</b> : Dry temperature (deg Celsius)</li> <li>- <b>HR</b> : Relative humidity (percent)</li> <li>- <b>ZW</b> : Wet zenith path delay (mm), (for WVR data)</li> <li>- <b>ZD</b> : Dry component of zen.path delay (mm)</li> <li>- <b>ZT</b> : Total zenith path delay (mm)</li> <li>- <b>WD</b> : Wind azimuth (deg) from where the wind blows</li> <li>- <b>WS</b> : Wind speed (m/s)</li> <li>- <b>RI</b> : "Rain increment" (1/10 mm): Rain accumulation since last measurement</li> <li>- <b>HI</b> : Hail indicator non-zero: Hail detected since last measurement</li> <li>- The sequence of the types in this record must correspond to the sequence of the measurements in the data records.</li> <li>- If more than 9 observation types are being used, use continuation lines with format (6X,9(4X,A2))</li> </ul> </li> </ul> | I6,<br><br>9(4X,A2) |

| <b>TABLE A16</b><br><b>METEOROLOGICAL DATA FILE - HEADER SECTION DESCRIPTION</b> |                                                                                                                                                                                                                                                                                             |                                      |
|----------------------------------------------------------------------------------|---------------------------------------------------------------------------------------------------------------------------------------------------------------------------------------------------------------------------------------------------------------------------------------------|--------------------------------------|
| <b>HEADER LABEL</b><br>(Columns 61-80)                                           | <b>DESCRIPTION</b>                                                                                                                                                                                                                                                                          | <b>FORMAT</b>                        |
| <b>SENSOR<br/>MOD/TYPE/ACC</b>                                                   | Description of the met sensor<br>- Model (manufacturer)<br>- Type<br>- Accuracy (same units as obs values)<br>- Observation type<br>Record is repeated for each observation type<br>found in # / <b>TYPES OF OBSERV</b> record                                                              | A20,<br>A20,6X,<br>F7.1,4X,<br>A2,1X |
| <b>SENSOR POS XYZ/H</b>                                                          | - Approximate position of the met sensor -<br>Geocentric coordinates X,Y,Z (ITRF<br>- Ellipsoidal height H or WGS-84)<br>- Observation type<br>Set X,Y,Z to zero if not known.<br>Make sure H refers to ITRF or WGS-84!<br>Record required for barometer, recommended<br>for other sensors. | 3F14.4,<br>1F14.4,<br>1X,A2,1X       |
| <b>END OF HEADER</b>                                                             | Last record in the header section.                                                                                                                                                                                                                                                          | 60X                                  |

Records marked with \* are optional

### A 17 Meteorological Data File -Data Record Description

| TABLE A17<br>METEOROLOGICAL DATA FILE - DATA RECORD DESCRIPTION |                                                                                   |           |
|-----------------------------------------------------------------|-----------------------------------------------------------------------------------|-----------|
| OBS. RECORD                                                     | DESCRIPTION                                                                       | FORMAT    |
| EPOCH / MET                                                     | - Epoch in GPS time (not local time!) year (4 digits, padded with 0 if necessary) | 1X,I4.4,  |
|                                                                 | - month, day, hour, min, sec                                                      | 5(1X,I2), |
|                                                                 | - Met data in the same sequence as given in the header                            | mF7.1     |
|                                                                 | More than 8 met data types: Use continuation lines                                | 4X,10F7.1 |

### A 18 Meteorological Data File – Example

| TABLE A18                                                                        |   |    |   |                     |    |                     |        |                     |                        |  |                     |  |  |
|----------------------------------------------------------------------------------|---|----|---|---------------------|----|---------------------|--------|---------------------|------------------------|--|---------------------|--|--|
| METEOROLOGICAL DATA FILE - EXAMPLE                                               |   |    |   |                     |    |                     |        |                     |                        |  |                     |  |  |
| ----- ---1 0--- ---2 0--- ---3 0--- ---4 0--- ---5 0--- ---6 0--- ---7 0--- ---8 |   |    |   |                     |    |                     |        |                     |                        |  |                     |  |  |
| 3.02                                                                             |   |    |   | METEOROLOGICAL DATA |    |                     |        |                     | RINEX VERSION / TYPE   |  |                     |  |  |
| XXRINEXM V9.9                                                                    |   |    |   | AIUB                |    | 19960401 144333 UTC |        |                     | PGM / RUN BY / DATE    |  |                     |  |  |
| EXAMPLE OF A MET DATA FILE                                                       |   |    |   |                     |    |                     |        |                     | COMMENT                |  |                     |  |  |
| A 9080                                                                           |   |    |   |                     |    |                     |        |                     | MARKER NAME            |  |                     |  |  |
| 3                                                                                |   | PR |   | TD                  |    | HR                  |        | # / TYPES OF OBSERV |                        |  |                     |  |  |
| PAROSCIENTIFIC                                                                   |   |    |   | 740-16B             |    |                     | 0.2    |                     | PR SENSOR MOD/TYPE/ACC |  |                     |  |  |
| HAENNI                                                                           |   |    |   |                     |    |                     | 0.1    |                     | TD SENSOR MOD/TYPE/ACC |  |                     |  |  |
| ROTRONIC                                                                         |   |    |   | I-240W              |    |                     | 5.0    |                     | HR SENSOR MOD/TYPE/ACC |  |                     |  |  |
| 0.0000                                                                           |   |    |   | 0.0000              |    |                     | 0.0000 |                     | 1234.5678              |  | PR SENSOR POS XYZ/H |  |  |
| END OF HEADER                                                                    |   |    |   |                     |    |                     |        |                     |                        |  |                     |  |  |
| 1996                                                                             | 4 | 1  | 0 | 0                   | 15 | 987.1               | 10.6   | 89.5                |                        |  |                     |  |  |
| 1996                                                                             | 4 | 1  | 0 | 0                   | 30 | 987.2               | 10.9   | 90.0                |                        |  |                     |  |  |
| 1996                                                                             | 4 | 1  | 0 | 0                   | 45 | 987.1               | 11.6   | 89.0                |                        |  |                     |  |  |
| ----- ---1 0--- ---2 0--- ---3 0--- ---4 0--- ---5 0--- ---6 0--- ---7 0--- ---8 |   |    |   |                     |    |                     |        |                     |                        |  |                     |  |  |

### A 19 Reference Code and Phase Alignment by Constellation and Frequency Band

| <b>TABLE A19</b><br><b>Reference Code and Phase Alignment by Frequency Band</b> |                      |                 |               |                        |                                                                                                                                                 |
|---------------------------------------------------------------------------------|----------------------|-----------------|---------------|------------------------|-------------------------------------------------------------------------------------------------------------------------------------------------|
| System                                                                          | Frequency Band       | Frequency [MHz] | Signal        | RINEX Observation Code | Phase Correction applied to each observed phase to obtain aligned phase.<br><br>( $\phi_{\text{RINEX}} = \phi_{\text{original}} + \Delta\phi$ ) |
| GPS                                                                             | L1                   | 1575.42         | C/A           | L1C                    | None (Reference Signal)                                                                                                                         |
|                                                                                 |                      |                 | L1C-D         | L1S                    | + $\frac{1}{4}$ cycle                                                                                                                           |
|                                                                                 |                      |                 | L1C-P         | L1L                    | + $\frac{1}{4}$ cycle                                                                                                                           |
|                                                                                 |                      |                 | L1C-(D+P)     | L1X                    | + $\frac{1}{4}$ cycle                                                                                                                           |
|                                                                                 |                      |                 | P             | L1P                    | + $\frac{1}{4}$ cycle                                                                                                                           |
|                                                                                 |                      |                 | Z-tracking    | L1W                    | + $\frac{1}{4}$ cycle                                                                                                                           |
|                                                                                 |                      |                 | Codeless      | L1N                    | + $\frac{1}{4}$ cycle                                                                                                                           |
|                                                                                 | L2<br><br>See Note 1 | 1227.60         | C/A           | L2C                    | For Block II/IIA/IIR – None;<br><br>For Block IIR-M/IIF/III<br><br>- $\frac{1}{4}$ cycle<br><br>See Note 2                                      |
|                                                                                 |                      |                 | Semi-codeless | L2D                    | None                                                                                                                                            |
|                                                                                 |                      |                 | L2C(M)        | L2S                    | - $\frac{1}{4}$ cycle                                                                                                                           |
|                                                                                 |                      |                 | L2C(L)        | L2L                    | - $\frac{1}{4}$ cycle                                                                                                                           |
|                                                                                 |                      |                 | L2C(M+L)      | L2X                    | - $\frac{1}{4}$ cycle                                                                                                                           |
|                                                                                 |                      |                 | P             | L2P                    | None (Reference Signal)                                                                                                                         |
|                                                                                 |                      |                 | Z-tracking    | L2W                    | None                                                                                                                                            |
|                                                                                 |                      |                 | Codeless      | L2N                    | None                                                                                                                                            |
|                                                                                 | L5                   | 1176.45         | I             | L5I                    | None (Reference Signal)                                                                                                                         |
|                                                                                 |                      |                 | Q             | L5Q                    | - $\frac{1}{4}$ cycle                                                                                                                           |
|                                                                                 |                      |                 | I+Q           | L5X                    | Must be aligned to L5I                                                                                                                          |
| GLONASS                                                                         | G1                   | 1602+k*9/16     | C/A           | L1C                    | None (Reference Signal)                                                                                                                         |
|                                                                                 |                      |                 | P             | L1P                    | + $\frac{1}{4}$ cycle                                                                                                                           |
|                                                                                 | G2                   | 1246+k*7/16     | C/A           | L2C                    | None (Reference                                                                                                                                 |



| TABLE A19                                            |                |                 |                   |                        |                                                                                                                                                                         |
|------------------------------------------------------|----------------|-----------------|-------------------|------------------------|-------------------------------------------------------------------------------------------------------------------------------------------------------------------------|
| Reference Code and Phase Alignment by Frequency Band |                |                 |                   |                        |                                                                                                                                                                         |
| System                                               | Frequency Band | Frequency [MHz] | Signal            | RINEX Observation Code | Phase Correction applied to each observed phase to obtain aligned phase.<br><br>( $\phi_{\text{RINEX}} = \phi_{\text{original}}$ (as issued by the SV) + $\Delta\phi$ ) |
|                                                      | G3             | 1202.025        |                   |                        | Signal)                                                                                                                                                                 |
|                                                      |                |                 | P                 | L2P                    | +¼ cycle                                                                                                                                                                |
|                                                      |                |                 | I                 | L3I                    | None (Reference Signal)                                                                                                                                                 |
|                                                      |                |                 | Q                 | L3Q                    | -¼ cycle                                                                                                                                                                |
| Galileo                                              | E1             | 1575.42         | I+Q               | L3X                    | Must be aligned to L3I                                                                                                                                                  |
|                                                      |                |                 | B I/NAV OS/CS/SoL | L1B                    | None (Reference Signal)                                                                                                                                                 |
|                                                      |                |                 | C no data         | L1C                    | +½ cycle                                                                                                                                                                |
|                                                      | E5A            | 1176.45         | B+C               | L1X                    | Must be aligned to L1B                                                                                                                                                  |
|                                                      |                |                 | I                 | L5I                    | None(Reference Signal)                                                                                                                                                  |
|                                                      |                |                 | Q                 | L5Q                    | -¼ cycle                                                                                                                                                                |
|                                                      | E5B            | 1207.140        | I+Q               | L5X                    | Must be aligned to L5I                                                                                                                                                  |
|                                                      |                |                 | I                 | L7I                    | None (Reference Signal)                                                                                                                                                 |
|                                                      |                |                 | Q                 | L7Q                    | -¼ cycle                                                                                                                                                                |
|                                                      | E5(A+B)        | 1191.795        | I+Q               | L7X                    | Must be aligned to L7I                                                                                                                                                  |
|                                                      |                |                 | I                 | L8I                    | None (Reference Signal)                                                                                                                                                 |
|                                                      |                |                 | Q                 | L8Q                    | -¼ cycle                                                                                                                                                                |
|                                                      | E6             | 1278.75         | I+Q               | L8X                    | Must be aligned to L8I                                                                                                                                                  |
|                                                      |                |                 | B                 | L6B                    | None (Reference Signal)                                                                                                                                                 |
|                                                      |                |                 | C                 | L6C                    | -½ cycle                                                                                                                                                                |
|                                                      | QZSS           | L1              | 1575.42           | B+C                    | L6X                                                                                                                                                                     |
| C/A                                                  |                |                 |                   | L1C                    | None (Reference Signal)                                                                                                                                                 |
| L1C (D)                                              |                |                 |                   | L1S                    | None                                                                                                                                                                    |
| L1C (P)                                              |                |                 |                   | L1L                    | +¼ cycle                                                                                                                                                                |
| L1C-(D+P)                                            |                |                 |                   | L1X                    | +¼ cycle                                                                                                                                                                |
| L2                                                   | 1227.60        | L1-SAIF         | L1Z               | N/A                    |                                                                                                                                                                         |
|                                                      |                | L2C (M)         | L2S               | None (Reference        |                                                                                                                                                                         |

| <b>TABLE A19</b><br><b>Reference Code and Phase Alignment by Frequency Band</b> |                |                 |           |                        |                                                                                                                                                                             |
|---------------------------------------------------------------------------------|----------------|-----------------|-----------|------------------------|-----------------------------------------------------------------------------------------------------------------------------------------------------------------------------|
| System                                                                          | Frequency Band | Frequency [MHz] | Signal    | RINEX Observation Code | Phase Correction applied to each observed phase to obtain aligned phase.<br><br>( $\phi_{\text{RINEX}} = \phi_{\text{original}}(\text{as issued by the SV}) + \Delta\phi$ ) |
|                                                                                 |                |                 |           |                        | Signal)                                                                                                                                                                     |
|                                                                                 |                |                 | L2C (L)   | L2L                    | None                                                                                                                                                                        |
|                                                                                 |                |                 | L2C (M+L) | L2X                    | None                                                                                                                                                                        |
|                                                                                 | L5             | 1176.45         | I         | L5I                    | None (Reference Signal)                                                                                                                                                     |
|                                                                                 |                |                 | Q         | L5Q                    | -1/4 cycle                                                                                                                                                                  |
|                                                                                 |                |                 | I+Q       | L5X                    | Must be aligned to L5I                                                                                                                                                      |
|                                                                                 | LEX(6)         | 1278.75         | S         | L6S                    | None (Reference Signal)                                                                                                                                                     |
|                                                                                 |                |                 | L         | L6L                    | None                                                                                                                                                                        |
|                                                                                 |                |                 | S+L       | L6X                    | None                                                                                                                                                                        |
| BDS                                                                             | B1             | 1561.098        | I         | L1I                    | None (Reference Signal)                                                                                                                                                     |
|                                                                                 |                |                 | Q         | L1Q                    | -1/4 cycle                                                                                                                                                                  |
|                                                                                 |                |                 | I+Q       | L1X                    | Must be aligned to L2I                                                                                                                                                      |
|                                                                                 | B2             | 1207.140        | I         | L7I                    | None (Reference Signal)                                                                                                                                                     |
|                                                                                 |                |                 | Q         | L7Q                    | -1/4 cycle                                                                                                                                                                  |
|                                                                                 |                |                 | I+Q       | L7X                    | Must be aligned to L7I                                                                                                                                                      |
|                                                                                 | B3             | 1268.52         | I         | L6I                    | None (Reference Signal)                                                                                                                                                     |
|                                                                                 |                |                 | Q         | L6Q                    | -1/4 cycle                                                                                                                                                                  |
|                                                                                 |                |                 | I+Q       | L6X                    | Must be aligned to L6I                                                                                                                                                      |

## NOTES:

- 1) The GPS L2 phase shift values ignore FlexPower when the phases of the L2E and L2C can be changed on the satellite.
- 2) The phase of the L2 C/A signal is dependent on the GPS satellite generation.
