# Supplementary material for: Improved GNSS integer ambiguity resolution method based on the column oriented Cholesky decomposition
Source: Research Square preprint supplement (doi:10.21203/rs.3.rs-2360038/v1), 2022-12-20
Supplement: Supplementary file 3 [file Figure 3-simulation1.xlsx]

## Sheet: Sheet1
Floating point solution a	130.331	-82.1261	-104.506	18.2593	-67.5083
Floating point solution a	130.331	-82.1261	-104.506	18.2593	-67.5083	224.523
Floating point solution a	130.331	-82.1261	-104.506	18.2593	-67.5083	224.523	10.6306
Floating point solution a	130.331	-82.1261	-104.506	18.2593	-67.5083	224.523	10.6306	131.873
Floating point solution a	130.331	-82.1261	-104.506	18.2593	-67.5083	224.523	10.6306	131.873	21.5575
Floating point solution a	130.331	-82.1261	-104.506	18.2593	-67.5083	224.523	10.6306	131.873	21.5575	88.5844
Floating point solution a	130.331	-82.1261	-104.506	18.2593	-67.5083	224.523	10.6306	131.873	21.5575	88.5844	201.085
Floating point solution a	130.331	-82.1261	-104.506	18.2593	-67.5083	224.523	10.6306	131.873	21.5575	88.5844	201.085	-2.8455
Floating point solution a	130.331	-82.1261	-104.506	18.2593	-67.5083	224.523	10.6306	131.873	21.5575	88.5844	201.085	-2.8455	63.5165
Floating point solution a	130.331	-82.1261	-104.506	18.2593	-67.5083	224.523	10.6306	131.873	21.5575	88.5844	201.085	-2.8455	63.5165	68.8538
Floating point solution a	130.331	-82.1261	-104.506	18.2593	-67.5083	224.523	10.6306	131.873	21.5575	88.5844	201.085	-2.8455	63.5165	68.8538	127.597
Floating point solution a	130.331	-82.1261	-104.506	18.2593	-67.5083	224.523	10.6306	131.873	21.5575	88.5844	201.085	-2.8455	63.5165	68.8538	127.597	26.5142
Floating point solution a	130.331	-82.1261	-104.506	18.2593	-67.5083	224.523	10.6306	131.873	21.5575	88.5844	201.085	-2.8455	63.5165	68.8538	127.597	26.5142	-106.641
Floating point solution a	130.331	-82.1261	-104.506	18.2593	-67.5083	224.523	10.6306	131.873	21.5575	88.5844	201.085	-2.8455	63.5165	68.8538	127.597	26.5142	-106.641	78.0602
Floating point solution a	130.331	-82.1261	-104.506	18.2593	-67.5083	224.523	10.6306	131.873	21.5575	88.5844	201.085	-2.8455	63.5165	68.8538	127.597	26.5142	-106.641	78.0602	-122.588
Floating point solution a	130.331	-82.1261	-104.506	18.2593	-67.5083	224.523	10.6306	131.873	21.5575	88.5844	201.085	-2.8455	63.5165	68.8538	127.597	26.5142	-106.641	78.0602	-122.588	34.9073
Floating point solution a	130.331	-82.1261	-104.506	18.2593	-67.5083	224.523	10.6306	131.873	21.5575	88.5844	201.085	-2.8455	63.5165	68.8538	127.597	26.5142	-106.641	78.0602	-122.588	34.9073	-12.3672
Floating point solution a	130.331	-82.1261	-104.506	18.2593	-67.5083	224.523	10.6306	131.873	21.5575	88.5844	201.085	-2.8455	63.5165	68.8538	127.597	26.5142	-106.641	78.0602	-122.588	34.9073	-12.3672	75.1373
Floating point solution a	130.331	-82.1261	-104.506	18.2593	-67.5083	224.523	10.6306	131.873	21.5575	88.5844	201.085	-2.8455	63.5165	68.8538	127.597	26.5142	-106.641	78.0602	-122.588	34.9073	-12.3672	75.1373	101.628
Floating point solution a	130.331	-82.1261	-104.506	18.2593	-67.5083	224.523	10.6306	131.873	21.5575	88.5844	201.085	-2.8455	63.5165	68.8538	127.597	26.5142	-106.641	78.0602	-122.588	34.9073	-12.3672	75.1373	101.628	-57.3793
Floating point solution a	130.331	-82.1261	-104.506	18.2593	-67.5083	224.523	10.6306	131.873	21.5575	88.5844	201.085	-2.8455	63.5165	68.8538	127.597	26.5142	-106.641	78.0602	-122.588	34.9073	-12.3672	75.1373	101.628	-57.3793	-23.3895
Floating point solution a	130.331	-82.1261	-104.506	18.2593	-67.5083	224.523	10.6306	131.873	21.5575	88.5844	201.085	-2.8455	63.5165	68.8538	127.597	26.5142	-106.641	78.0602	-122.588	34.9073	-12.3672	75.1373	101.628	-57.3793	-23.3895	43.6551
Floating point solution a	130.331	-82.1261	-104.506	18.2593	-67.5083	224.523	10.6306	131.873	21.5575	88.5844	201.085	-2.8455	63.5165	68.8538	127.597	26.5142	-106.641	78.0602	-122.588	34.9073	-12.3672	75.1373	101.628	-57.3793	-23.3895	43.6551	-67.5227
Floating point solution a	130.331	-82.1261	-104.506	18.2593	-67.5083	224.523	10.6306	131.873	21.5575	88.5844	201.085	-2.8455	63.5165	68.8538	127.597	26.5142	-106.641	78.0602	-122.588	34.9073	-12.3672	75.1373	101.628	-57.3793	-23.3895	43.6551	-67.5227	80.2545
Floating point solution a	130.331	-82.1261	-104.506	18.2593	-67.5083	224.523	10.6306	131.873	21.5575	88.5844	201.085	-2.8455	63.5165	68.8538	127.597	26.5142	-106.641	78.0602	-122.588	34.9073	-12.3672	75.1373	101.628	-57.3793	-23.3895	43.6551	-67.5227	80.2545	-31.2372
Floating point solution a	130.331	-82.1261	-104.506	18.2593	-67.5083	224.523	10.6306	131.873	21.5575	88.5844	201.085	-2.8455	63.5165	68.8538	127.597	26.5142	-106.641	78.0602	-122.588	34.9073	-12.3672	75.1373	101.628	-57.3793	-23.3895	43.6551	-67.5227	80.2545	-31.2372	-4.2215
Floating point solution a	130.331	-82.1261	-104.506	18.2593	-67.5083	224.523	10.6306	131.873	21.5575	88.5844	201.085	-2.8455	63.5165	68.8538	127.597	26.5142	-106.641	78.0602	-122.588	34.9073	-12.3672	75.1373	101.628	-57.3793	-23.3895	43.6551	-67.5227	80.2545	-31.2372	-4.2215	25.7881
Floating point solution a	130.331	-82.1261	-104.506	18.2593	-67.5083	224.523	10.6306	131.873	21.5575	88.5844	201.085	-2.8455	63.5165	68.8538	127.597	26.5142	-106.641	78.0602	-122.588	34.9073	-12.3672	75.1373	101.628	-57.3793	-23.3895	43.6551	-67.5227	80.2545	-31.2372	-4.2215	25.7881	-25.3744
Floating point solution a	130.331	-82.1261	-104.506	18.2593	-67.5083	224.523	10.6306	131.873	21.5575	88.5844	201.085	-2.8455	63.5165	68.8538	127.597	26.5142	-106.641	78.0602	-122.588	34.9073	-12.3672	75.1373	101.628	-57.3793	-23.3895	43.6551	-67.5227	80.2545	-31.2372	-4.2215	25.7881	-25.3744	-31.2344
Floating point solution a	130.331	-82.1261	-104.506	18.2593	-67.5083	224.523	10.6306	131.873	21.5575	88.5844	201.085	-2.8455	63.5165	68.8538	127.597	26.5142	-106.641	78.0602	-122.588	34.9073	-12.3672	75.1373	101.628	-57.3793	-23.3895	43.6551	-67.5227	80.2545	-31.2372	-4.2215	25.7881	-25.3744	-31.2344	-20.0177
Floating point solution a	130.331	-82.1261	-104.506	18.2593	-67.5083	224.523	10.6306	131.873	21.5575	88.5844	201.085	-2.8455	63.5165	68.8538	127.597	26.5142	-106.641	78.0602	-122.588	34.9073	-12.3672	75.1373	101.628	-57.3793	-23.3895	43.6551	-67.5227	80.2545	-31.2372	-4.2215	25.7881	-25.3744	-31.2344	-20.0177	50.8824
Floating point solution a	130.331	-82.1261	-104.506	18.2593	-67.5083	224.523	10.6306	131.873	21.5575	88.5844	201.085	-2.8455	63.5165	68.8538	127.597	26.5142	-106.641	78.0602	-122.588	34.9073	-12.3672	75.1373	101.628	-57.3793	-23.3895	43.6551	-67.5227	80.2545	-31.2372	-4.2215	25.7881	-25.3744	-31.2344	-20.0177	50.8824	-148.403
Floating point solution a	130.331	-82.1261	-104.506	18.2593	-67.5083	224.523	10.6306	131.873	21.5575	88.5844	201.085	-2.8455	63.5165	68.8538	127.597	26.5142	-106.641	78.0602	-122.588	34.9073	-12.3672	75.1373	101.628	-57.3793	-23.3895	43.6551	-67.5227	80.2545	-31.2372	-4.2215	25.7881	-25.3744	-31.2344	-20.0177	50.8824	-148.403	-93.933
Floating point solution a	130.331	-82.1261	-104.506	18.2593	-67.5083	224.523	10.6306	131.873	21.5575	88.5844	201.085	-2.8455	63.5165	68.8538	127.597	26.5142	-106.641	78.0602	-122.588	34.9073	-12.3672	75.1373	101.628	-57.3793	-23.3895	43.6551	-67.5227	80.2545	-31.2372	-4.2215	25.7881	-25.3744	-31.2344	-20.0177	50.8824	-148.403	-93.933	38.7282
Floating point solution a	130.331	-82.1261	-104.506	18.2593	-67.5083	224.523	10.6306	131.873	21.5575	88.5844	201.085	-2.8455	63.5165	68.8538	127.597	26.5142	-106.641	78.0602	-122.588	34.9073	-12.3672	75.1373	101.628	-57.3793	-23.3895	43.6551	-67.5227	80.2545	-31.2372	-4.2215	25.7881	-25.3744	-31.2344	-20.0177	50.8824	-148.403	-93.933	38.7282	93.2062
Floating point solution a	130.331	-82.1261	-104.506	18.2593	-67.5083	224.523	10.6306	131.873	21.5575	88.5844	201.085	-2.8455	63.5165	68.8538	127.597	26.5142	-106.641	78.0602	-122.588	34.9073	-12.3672	75.1373	101.628	-57.3793	-23.3895	43.6551	-67.5227	80.2545	-31.2372	-4.2215	25.7881	-25.3744	-31.2344	-20.0177	50.8824	-148.403	-93.933	38.7282	93.2062	57.9972
Lt matrix	1	-0.8213	0.1826	0.1063	2.0109	0.2651	0.7514	-0.3124	-0.9393	0.5149	-1.6253	-0.2997	1.0697	-0.923	0.5249	0.4004	-0.6138	1.8249	1.4395	0.0597	0.7469	-1.7123	-0.0284	-1.1351	1.1352	1.0483	0.5314	0.2535	-0.2893	1.6989	0.2447	-0.6348	-0.5529	-0.7258	-1.46	0.2189	-0.3118	-0.6202	-0.5852	-0.2803
2	0	1	-0.6751	1.3187	-0.0285	-1.0664	1.0163	-0.0422	0.3873	-1.2232	-0.2497	0.389	-0.4213	0.4469	0.0708	-0.3617	-1.4152	-1.0023	0.4285	1.0289	-0.8544	-1.2747	1.1321	-1.4565	-0.7505	-0.5362	0.0966	-0.8129	-0.716	-0.9698	-0.0985	0.14	-1.2679	0.586	-1.6144	-0.0306	-0.2455	-0.1113	-2.2055	2.2651
3	0	0	1	0.2156	0.6352	0.7806	-0.5738	0.2579	0.9321	-1.1728	0.6065	2.2525	0.3309	-0.6934	1.1947	-0.5181	0.0823	1.3135	-0.5953	2.4597	-1.5127	-1.1962	1.2019	-0.6487	0.4261	0.5218	0.7393	-0.3138	0.7749	-0.648	2.0509	-0.1413	-1.445	0.4096	0.8145	-2.0161	0.2152	-0.042	-1.1173	-1.0982
4	0	0	0	1	0.6885	-1.2259	-0.2339	-0.2537	0.58	-2.0044	-1.111	1.785	-0.7126	0.5617	0.6671	-0.577	0.7564	0.1495	0.3366	2.7116	1.0921	0.7849	-0.086	0.8382	-1.1802	1.4319	-0.834	0.005	-1.5038	-0.7029	-0.0224	-0.5032	0.0461	-0.8533	-1.8698	-0.0368	0.1358	-0.6288	-0.7483	0.1518
5	0	0	0	0	1	0.3491	0.4366	-0.3123	0.4908	0.0578	0.4685	0.7506	0.773	0.6895	0.3973	-1.2006	-0.8931	-0.2166	-0.2876	-0.5071	-0.5249	-0.7395	-0.4211	-0.2216	0.9013	0.5389	-1.1191	-1.0926	1.5314	1.0653	0.1931	0.7701	1.0042	-2.2129	1.0221	-0.093	-0.9111	0.5987	0.1083	-0.3911
6	0	0	0	0	0	1	-0.6752	-0.2002	-0.5126	0.6748	0.0273	-0.7089	0.9428	-0.633	1.0792	-0.7957	-2.8829	0.9942	-0.0883	0.0296	1.9601	-0.4062	-1.3363	0.6663	-0.6592	-0.1588	-0.1288	2.2449	0.5952	-0.7985	-0.4132	0.8201	-0.6519	0.4268	0.6124	-0.8513	-0.0826	0.4123	-0.7152	-0.578
7	0	0	0	0	0	0	1	0.5088	0.6201	-0.6278	-0.0705	0.4161	0.0739	0.747	1.7539	0.2496	-2.0639	-0.5699	-0.2762	0.8415	-0.2123	0.3531	-0.4336	-1.6385	0.5662	1.6947	1.4305	0.8851	0.3459	0.1354	-0.0176	-0.4346	-0.282	-0.6021	-0.6052	0.3739	-2.4667	-0.8585	0.0184	-0.1932
8	0	0	0	0	0	0	0	1	0.255	0.782	-0.1684	0.7043	0.9395	-0.3552	-2.0212	0.9021	-0.5221	0.7766	-0.2671	2.3789	1.1373	-0.3761	-1.0674	0.0413	0.7663	-0.5668	0.3737	-0.2366	-1.5792	-0.5515	0.6682	-0.2729	1.0445	0.5474	0.2898	-0.4322	0.3384	-1.2745	-0.1736	-0.211
9	0	0	0	0	0	0	0	0	1	0.7391	-0.3891	-0.4143	0.154	0.8621	-0.2264	0.8052	-0.1812	0.5674	-0.6743	0.283	0.3567	1.6995	-0.6693	1.0953	0.2054	0.3266	-1.3254	-1.5443	0.975	0.8598	0.2201	-1.9054	-1.0284	-0.1162	0.3215	-0.0623	0.9357	1.0985	-0.7923	-0.3352
10	0	0	0	0	0	0	0	0	0	1	-1.504	0.4941	-1.7685	-1.0525	1.595	0.1119	-0.5052	-0.1556	-0.8344	0.0231	0.9034	0.1883	-1.0305	-0.3867	-0.8836	-1.6432	0.7824	0.6421	0.397	-0.0553	1.0703	0.3155	-0.902	1.1076	-0.8129	-1.5186	-0.3435	-1.4084	0.3245	-0.6506
11	0	0	0	0	0	0	0	0	0	0	1	-0.1313	1.0612	1.573	-0.4982	0.0148	-0.0099	-0.3189	0.5776	-1.6834	0.2347	0.8586	-1.1502	-0.2196	0.6823	1.1543	-0.4433	0.0983	-0.6489	1.0164	-0.0619	-0.0279	-1.7734	1.7311	-0.4602	-0.8264	0.9312	-0.5057	-0.3093	0.6789
12	0	0	0	0	0	0	0	0	0	0	0	1	2.8178	1.5542	-0.6989	0.2374	1.1196	0.3814	-1.117	0.6959	-1.0542	-0.196	-0.0459	-2.6795	-0.116	0.5989	0.0456	0.3751	-1.1206	0.842	0.2291	0.096	0.0387	0.8544	1.5272	-0.1485	-0.7352	1.601	-0.5816	-0.1344
13	0	0	0	0	0	0	0	0	0	0	0	0	1	0.1732	1.5932	0.0208	0.6295	1.6538	2.1773	2.401	1.2873	0.5258	-0.7552	0.7066	-1.835	-0.1828	0.8437	0.0116	-0.2783	-2.0396	1.551	-1.0855	-0.2341	-0.7631	-1.321	2.3253	-0.5314	-1.3811	-0.6254	-0.8996
14	0	0	0	0	0	0	0	0	0	0	0	0	0	1	0.7158	-0.216	0.6131	-0.1254	-0.6359	-1.1859	-0.6033	-0.3868	-1.2114	0.6491	-0.6076	-0.182	1.1459	-0.1261	0.808	0.8948	-0.4883	0.0557	-0.0008	-0.5937	1.7533	0.9573	0.6882	0.6362	0.6881	0.3443
15	0	0	0	0	0	0	0	0	0	0	0	0	0	0	1	2.003	0.6257	-0.1604	0.4641	-0.1517	0.1715	1.3123	-0.8316	0.7408	0.2564	-0.6376	-0.9733	-0.1311	0.9715	-0.6611	0.6374	-2.4803	2.0604	1.5536	-1.6292	2.4207	1.4338	-1.7981	-0.7429	0.9293
16	0	0	0	0	0	0	0	0	0	0	0	0	0	0	0	1	-0.0835	1.4409	1.1186	-0.6809	0.7182	-0.4234	0.3033	1.2799	-0.3805	-0.5183	-0.742	-0.3032	0.2968	-0.5612	-0.0568	-0.5789	-0.4887	-0.1061	2.105	-0.561	1.7924	0.3339	-0.1493	0.7466
17	0	0	0	0	0	0	0	0	0	0	0	0	0	0	0	0	1	0.1381	0.3404	-0.4878	0.5092	-0.6051	-1.4406	2.3403	2.0157	0.9298	1.1626	0.9573	0.4042	0.0482	-1.3225	-0.6672	-0.187	0.6184	0.4631	-0.6965	-1.1797	-1.2747	0.0024	-0.0637
18	0	0	0	0	0	0	0	0	0	0	0	0	0	0	0	0	0	1	0.8558	1.7051	-1.8166	-1.4672	-1.2266	-2.604	0.0626	-1.3998	-0.1429	-0.2568	1.1265	1.0123	-0.6512	1.2883	0.2913	-0.8468	-2.0845	-0.6101	-0.2684	2.2645	1.4292	0.4174
19	0	0	0	0	0	0	0	0	0	0	0	0	0	0	0	0	0	0	1	0.7831	-0.5732	0.9937	0.2944	-1.1159	0.7383	-2.0873	0.4212	0.2229	-0.0797	-0.1391	-0.7903	1.6099	1.1684	-1.1113	-0.318	-0.388	0.2156	-0.4241	-0.7017	-0.2929
20	0	0	0	0	0	0	0	0	0	0	0	0	0	0	0	0	0	0	0	1	-1.6425	2.0303	-0.1283	-0.8299	0.4652	0.6648	-0.3675	0.4884	0.5371	-1.4557	1.8447	0.4657	0.9354	2.4368	0.4665	0.5541	0.8027	0.3421	0.4844	2.9696
21	0	0	0	0	0	0	0	0	0	0	0	0	0	0	0	0	0	0	0	0	1	-0.3735	0.8339	-0.6188	-2.0727	-1.3314	0.7847	0.5923	0.3183	-2.1746	1.3544	-0.5715	1.349	-1.6053	-0.2753	-0.3102	0.1826	0.9297	-0.3661	0.612
22	0	0	0	0	0	0	0	0	0	0	0	0	0	0	0	0	0	0	0	0	0	1	-0.4538	-1.2893	-0.2305	1.1961	0.5921	-1.9579	0.0389	1.8475	1.3657	1.5652	0.281	-0.4514	0.4857	-0.8011	1.0344	0.3294	0.1568	0.2431
23	0	0	0	0	0	0	0	0	0	0	0	0	0	0	0	0	0	0	0	0	0	0	1	-1.29	-0.5584	0.8405	-1.5547	-2.7485	-0.7023	-1.942	-1.1488	0.9186	-1.4871	0.2139	-1.5942	0.8961	-0.6381	0.3902	-0.5232	0.6207
24	0	0	0	0	0	0	0	0	0	0	0	0	0	0	0	0	0	0	0	0	0	0	0	1	-0.8331	0.5302	0.6297	0.4918	-0.5809	-0.1986	-1.4863	0.7161	0.8491	-0.9867	0.542	-1.2495	0.5182	-0.5053	-1.4688	1.3504
25	0	0	0	0	0	0	0	0	0	0	0	0	0	0	0	0	0	0	0	0	0	0	0	0	1	-0.4843	-0.7348	-0.337	-0.0976	1.8636	0.0022	-0.2028	-0.3243	0.417	0.0772	0.2415	-1.2254	0.9168	-0.1445	1.3727
26	0	0	0	0	0	0	0	0	0	0	0	0	0	0	0	0	0	0	0	0	0	0	0	0	0	1	1.5106	0.1396	1.4829	0.4945	0.449	-1.2755	-0.284	1.3326	-1.4797	-0.4965	-0.4464	-1.0614	-0.8637	-0.6229
27	0	0	0	0	0	0	0	0	0	0	0	0	0	0	0	0	0	0	0	0	0	0	0	0	0	0	1	-1.7136	0.345	-0.9985	0.6554	-0.566	0.231	-0.2876	0.8365	-0.0009	-2.0124	-0.3113	0.5748	-1.2975
28	0	0	0	0	0	0	0	0	0	0	0	0	0	0	0	0	0	0	0	0	0	0	0	0	0	0	0	1	0.9494	-1.0733	0.353	-1.0338	-0.0447	0.5931	0.0424	-0.5009	-1.1792	-0.6149	0.174	0.9391
29	0	0	0	0	0	0	0	0	0	0	0	0	0	0	0	0	0	0	0	0	0	0	0	0	0	0	0	0	1	-0.0217	0.8914	0.2075	-2.0651	0.1267	0.0129	-1.1154	0.3929	0.6258	-1.0128	-0.8042
30	0	0	0	0	0	0	0	0	0	0	0	0	0	0	0	0	0	0	0	0	0	0	0	0	0	0	0	0	0	1	-0.0848	0.611	0.0472	0.8905	0.2306	0.6045	-0.5165	-1.3308	-1.076	0.0434
31	0	0	0	0	0	0	0	0	0	0	0	0	0	0	0	0	0	0	0	0	0	0	0	0	0	0	0	0	0	0	1	-1.0335	-1.1146	-3.5155	0.8924	-0.6487	0.8026	0.7453	1.0714	-0.5234
32	0	0	0	0	0	0	0	0	0	0	0	0	0	0	0	0	0	0	0	0	0	0	0	0	0	0	0	0	0	0	0	1	-0.3767	0.1621	0.102	0.6807	-0.1491	0.3134	-1.2266	-0.7808
33	0	0	0	0	0	0	0	0	0	0	0	0	0	0	0	0	0	0	0	0	0	0	0	0	0	0	0	0	0	0	0	0	1	0.4966	0.498	0.0253	-0.185	-0.8637	1.3371	-0.1067
34	0	0	0	0	0	0	0	0	0	0	0	0	0	0	0	0	0	0	0	0	0	0	0	0	0	0	0	0	0	0	0	0	0	1	-0.7184	0.4058	0.0662	1.3857	-0.081	2.238
35	0	0	0	0	0	0	0	0	0	0	0	0	0	0	0	0	0	0	0	0	0	0	0	0	0	0	0	0	0	0	0	0	0	0	1	-0.2309	0.3056	-0.7138	-1.293	-1.3391
36	0	0	0	0	0	0	0	0	0	0	0	0	0	0	0	0	0	0	0	0	0	0	0	0	0	0	0	0	0	0	0	0	0	0	0	1	0.6057	1.2594	-1.5942	1.3236
37	0	0	0	0	0	0	0	0	0	0	0	0	0	0	0	0	0	0	0	0	0	0	0	0	0	0	0	0	0	0	0	0	0	0	0	0	1	-2.1067	0.6116	-0.015
38	0	0	0	0	0	0	0	0	0	0	0	0	0	0	0	0	0	0	0	0	0	0	0	0	0	0	0	0	0	0	0	0	0	0	0	0	0	1	-0.8516	-1.5446
39	0	0	0	0	0	0	0	0	0	0	0	0	0	0	0	0	0	0	0	0	0	0	0	0	0	0	0	0	0	0	0	0	0	0	0	0	0	0	1	-0.7327
40	0	0	0	0	0	0	0	0	0	0	0	0	0	0	0	0	0	0	0	0	0	0	0	0	0	0	0	0	0	0	0	0	0	0	0	0	0	0	0	1
L matrix	1	0	0	0	0	0	0	0	0	0	0	0	0	0	0	0	0	0	0	0	0	0	0	0	0	0	0	0	0	0	0	0	0	0	0	0	0	0	0	0
2	-0.8213	1	0	0	0	0	0	0	0	0	0	0	0	0	0	0	0	0	0	0	0	0	0	0	0	0	0	0	0	0	0	0	0	0	0	0	0	0	0	0
3	0.1826	-0.6751	1	0	0	0	0	0	0	0	0	0	0	0	0	0	0	0	0	0	0	0	0	0	0	0	0	0	0	0	0	0	0	0	0	0	0	0	0	0
4	0.1063	1.3187	0.2156	1	0	0	0	0	0	0	0	0	0	0	0	0	0	0	0	0	0	0	0	0	0	0	0	0	0	0	0	0	0	0	0	0	0	0	0	0
5	2.0109	-0.0285	0.6352	0.6885	1	0	0	0	0	0	0	0	0	0	0	0	0	0	0	0	0	0	0	0	0	0	0	0	0	0	0	0	0	0	0	0	0	0	0	0
6	0.2651	-1.0664	0.7806	-1.2259	0.3491	1	0	0	0	0	0	0	0	0	0	0	0	0	0	0	0	0	0	0	0	0	0	0	0	0	0	0	0	0	0	0	0	0	0	0
7	0.7514	1.0163	-0.5738	-0.2339	0.4366	-0.6752	1	0	0	0	0	0	0	0	0	0	0	0	0	0	0	0	0	0	0	0	0	0	0	0	0	0	0	0	0	0	0	0	0	0
8	-0.3124	-0.0422	0.2579	-0.2537	-0.3123	-0.2002	0.5088	1	0	0	0	0	0	0	0	0	0	0	0	0	0	0	0	0	0	0	0	0	0	0	0	0	0	0	0	0	0	0	0	0
9	-0.9393	0.3873	0.9321	0.58	0.4908	-0.5126	0.6201	0.255	1	0	0	0	0	0	0	0	0	0	0	0	0	0	0	0	0	0	0	0	0	0	0	0	0	0	0	0	0	0	0	0
10	0.5149	-1.2232	-1.1728	-2.0044	0.0578	0.6748	-0.6278	0.782	0.7391	1	0	0	0	0	0	0	0	0	0	0	0	0	0	0	0	0	0	0	0	0	0	0	0	0	0	0	0	0	0	0
11	-1.6253	-0.2497	0.6065	-1.111	0.4685	0.0273	-0.0705	-0.1684	-0.3891	-1.504	1	0	0	0	0	0	0	0	0	0	0	0	0	0	0	0	0	0	0	0	0	0	0	0	0	0	0	0	0	0
12	-0.2997	0.389	2.2525	1.785	0.7506	-0.7089	0.4161	0.7043	-0.4143	0.4941	-0.1313	1	0	0	0	0	0	0	0	0	0	0	0	0	0	0	0	0	0	0	0	0	0	0	0	0	0	0	0	0
13	1.0697	-0.4213	0.3309	-0.7126	0.773	0.9428	0.0739	0.9395	0.154	-1.7685	1.0612	2.8178	1	0	0	0	0	0	0	0	0	0	0	0	0	0	0	0	0	0	0	0	0	0	0	0	0	0	0	0
14	-0.923	0.4469	-0.6934	0.5617	0.6895	-0.633	0.747	-0.3552	0.8621	-1.0525	1.573	1.5542	0.1732	1	0	0	0	0	0	0	0	0	0	0	0	0	0	0	0	0	0	0	0	0	0	0	0	0	0	0
15	0.5249	0.0708	1.1947	0.6671	0.3973	1.0792	1.7539	-2.0212	-0.2264	1.595	-0.4982	-0.6989	1.5932	0.7158	1	0	0	0	0	0	0	0	0	0	0	0	0	0	0	0	0	0	0	0	0	0	0	0	0	0
16	0.4004	-0.3617	-0.5181	-0.577	-1.2006	-0.7957	0.2496	0.9021	0.8052	0.1119	0.0148	0.2374	0.0208	-0.216	2.003	1	0	0	0	0	0	0	0	0	0	0	0	0	0	0	0	0	0	0	0	0	0	0	0	0
17	-0.6138	-1.4152	0.0823	0.7564	-0.8931	-2.8829	-2.0639	-0.5221	-0.1812	-0.5052	-0.0099	1.1196	0.6295	0.6131	0.6257	-0.0835	1	0	0	0	0	0	0	0	0	0	0	0	0	0	0	0	0	0	0	0	0	0	0	0
18	1.8249	-1.0023	1.3135	0.1495	-0.2166	0.9942	-0.5699	0.7766	0.5674	-0.1556	-0.3189	0.3814	1.6538	-0.1254	-0.1604	1.4409	0.1381	1	0	0	0	0	0	0	0	0	0	0	0	0	0	0	0	0	0	0	0	0	0	0
19	1.4395	0.4285	-0.5953	0.3366	-0.2876	-0.0883	-0.2762	-0.2671	-0.6743	-0.8344	0.5776	-1.117	2.1773	-0.6359	0.4641	1.1186	0.3404	0.8558	1	0	0	0	0	0	0	0	0	0	0	0	0	0	0	0	0	0	0	0	0	0
20	0.0597	1.0289	2.4597	2.7116	-0.5071	0.0296	0.8415	2.3789	0.283	0.0231	-1.6834	0.6959	2.401	-1.1859	-0.1517	-0.6809	-0.4878	1.7051	0.7831	1	0	0	0	0	0	0	0	0	0	0	0	0	0	0	0	0	0	0	0	0
21	0.7469	-0.8544	-1.5127	1.0921	-0.5249	1.9601	-0.2123	1.1373	0.3567	0.9034	0.2347	-1.0542	1.2873	-0.6033	0.1715	0.7182	0.5092	-1.8166	-0.5732	-1.6425	1	0	0	0	0	0	0	0	0	0	0	0	0	0	0	0	0	0	0	0
22	-1.7123	-1.2747	-1.1962	0.7849	-0.7395	-0.4062	0.3531	-0.3761	1.6995	0.1883	0.8586	-0.196	0.5258	-0.3868	1.3123	-0.4234	-0.6051	-1.4672	0.9937	2.0303	-0.3735	1	0	0	0	0	0	0	0	0	0	0	0	0	0	0	0	0	0	0
23	-0.0284	1.1321	1.2019	-0.086	-0.4211	-1.3363	-0.4336	-1.0674	-0.6693	-1.0305	-1.1502	-0.0459	-0.7552	-1.2114	-0.8316	0.3033	-1.4406	-1.2266	0.2944	-0.1283	0.8339	-0.4538	1	0	0	0	0	0	0	0	0	0	0	0	0	0	0	0	0	0
24	-1.1351	-1.4565	-0.6487	0.8382	-0.2216	0.6663	-1.6385	0.0413	1.0953	-0.3867	-0.2196	-2.6795	0.7066	0.6491	0.7408	1.2799	2.3403	-2.604	-1.1159	-0.8299	-0.6188	-1.2893	-1.29	1	0	0	0	0	0	0	0	0	0	0	0	0	0	0	0	0
25	1.1352	-0.7505	0.4261	-1.1802	0.9013	-0.6592	0.5662	0.7663	0.2054	-0.8836	0.6823	-0.116	-1.835	-0.6076	0.2564	-0.3805	2.0157	0.0626	0.7383	0.4652	-2.0727	-0.2305	-0.5584	-0.8331	1	0	0	0	0	0	0	0	0	0	0	0	0	0	0	0
26	1.0483	-0.5362	0.5218	1.4319	0.5389	-0.1588	1.6947	-0.5668	0.3266	-1.6432	1.1543	0.5989	-0.1828	-0.182	-0.6376	-0.5183	0.9298	-1.3998	-2.0873	0.6648	-1.3314	1.1961	0.8405	0.5302	-0.4843	1	0	0	0	0	0	0	0	0	0	0	0	0	0	0
27	0.5314	0.0966	0.7393	-0.834	-1.1191	-0.1288	1.4305	0.3737	-1.3254	0.7824	-0.4433	0.0456	0.8437	1.1459	-0.9733	-0.742	1.1626	-0.1429	0.4212	-0.3675	0.7847	0.5921	-1.5547	0.6297	-0.7348	1.5106	1	0	0	0	0	0	0	0	0	0	0	0	0	0
28	0.2535	-0.8129	-0.3138	0.005	-1.0926	2.2449	0.8851	-0.2366	-1.5443	0.6421	0.0983	0.3751	0.0116	-0.1261	-0.1311	-0.3032	0.9573	-0.2568	0.2229	0.4884	0.5923	-1.9579	-2.7485	0.4918	-0.337	0.1396	-1.7136	1	0	0	0	0	0	0	0	0	0	0	0	0
29	-0.2893	-0.716	0.7749	-1.5038	1.5314	0.5952	0.3459	-1.5792	0.975	0.397	-0.6489	-1.1206	-0.2783	0.808	0.9715	0.2968	0.4042	1.1265	-0.0797	0.5371	0.3183	0.0389	-0.7023	-0.5809	-0.0976	1.4829	0.345	0.9494	1	0	0	0	0	0	0	0	0	0	0	0
30	1.6989	-0.9698	-0.648	-0.7029	1.0653	-0.7985	0.1354	-0.5515	0.8598	-0.0553	1.0164	0.842	-2.0396	0.8948	-0.6611	-0.5612	0.0482	1.0123	-0.1391	-1.4557	-2.1746	1.8475	-1.942	-0.1986	1.8636	0.4945	-0.9985	-1.0733	-0.0217	1	0	0	0	0	0	0	0	0	0	0
31	0.2447	-0.0985	2.0509	-0.0224	0.1931	-0.4132	-0.0176	0.6682	0.2201	1.0703	-0.0619	0.2291	1.551	-0.4883	0.6374	-0.0568	-1.3225	-0.6512	-0.7903	1.8447	1.3544	1.3657	-1.1488	-1.4863	0.0022	0.449	0.6554	0.353	0.8914	-0.0848	1	0	0	0	0	0	0	0	0	0
32	-0.6348	0.14	-0.1413	-0.5032	0.7701	0.8201	-0.4346	-0.2729	-1.9054	0.3155	-0.0279	0.096	-1.0855	0.0557	-2.4803	-0.5789	-0.6672	1.2883	1.6099	0.4657	-0.5715	1.5652	0.9186	0.7161	-0.2028	-1.2755	-0.566	-1.0338	0.2075	0.611	-1.0335	1	0	0	0	0	0	0	0	0
33	-0.5529	-1.2679	-1.445	0.0461	1.0042	-0.6519	-0.282	1.0445	-1.0284	-0.902	-1.7734	0.0387	-0.2341	-0.0008	2.0604	-0.4887	-0.187	0.2913	1.1684	0.9354	1.349	0.281	-1.4871	0.8491	-0.3243	-0.284	0.231	-0.0447	-2.0651	0.0472	-1.1146	-0.3767	1	0	0	0	0	0	0	0
34	-0.7258	0.586	0.4096	-0.8533	-2.2129	0.4268	-0.6021	0.5474	-0.1162	1.1076	1.7311	0.8544	-0.7631	-0.5937	1.5536	-0.1061	0.6184	-0.8468	-1.1113	2.4368	-1.6053	-0.4514	0.2139	-0.9867	0.417	1.3326	-0.2876	0.5931	0.1267	0.8905	-3.5155	0.1621	0.4966	1	0	0	0	0	0	0
35	-1.46	-1.6144	0.8145	-1.8698	1.0221	0.6124	-0.6052	0.2898	0.3215	-0.8129	-0.4602	1.5272	-1.321	1.7533	-1.6292	2.105	0.4631	-2.0845	-0.318	0.4665	-0.2753	0.4857	-1.5942	0.542	0.0772	-1.4797	0.8365	0.0424	0.0129	0.2306	0.8924	0.102	0.498	-0.7184	1	0	0	0	0	0
36	0.2189	-0.0306	-2.0161	-0.0368	-0.093	-0.8513	0.3739	-0.4322	-0.0623	-1.5186	-0.8264	-0.1485	2.3253	0.9573	2.4207	-0.561	-0.6965	-0.6101	-0.388	0.5541	-0.3102	-0.8011	0.8961	-1.2495	0.2415	-0.4965	-0.0009	-0.5009	-1.1154	0.6045	-0.6487	0.6807	0.0253	0.4058	-0.2309	1	0	0	0	0
37	-0.3118	-0.2455	0.2152	0.1358	-0.9111	-0.0826	-2.4667	0.3384	0.9357	-0.3435	0.9312	-0.7352	-0.5314	0.6882	1.4338	1.7924	-1.1797	-0.2684	0.2156	0.8027	0.1826	1.0344	-0.6381	0.5182	-1.2254	-0.4464	-2.0124	-1.1792	0.3929	-0.5165	0.8026	-0.1491	-0.185	0.0662	0.3056	0.6057	1	0	0	0
38	-0.6202	-0.1113	-0.042	-0.6288	0.5987	0.4123	-0.8585	-1.2745	1.0985	-1.4084	-0.5057	1.601	-1.3811	0.6362	-1.7981	0.3339	-1.2747	2.2645	-0.4241	0.3421	0.9297	0.3294	0.3902	-0.5053	0.9168	-1.0614	-0.3113	-0.6149	0.6258	-1.3308	0.7453	0.3134	-0.8637	1.3857	-0.7138	1.2594	-2.1067	1	0	0
39	-0.5852	-2.2055	-1.1173	-0.7483	0.1083	-0.7152	0.0184	-0.1736	-0.7923	0.3245	-0.3093	-0.5816	-0.6254	0.6881	-0.7429	-0.1493	0.0024	1.4292	-0.7017	0.4844	-0.3661	0.1568	-0.5232	-1.4688	-0.1445	-0.8637	0.5748	0.174	-1.0128	-1.076	1.0714	-1.2266	1.3371	-0.081	-1.293	-1.5942	0.6116	-0.8516	1	0
40	-0.2803	2.2651	-1.0982	0.1518	-0.3911	-0.578	-0.1932	-0.211	-0.3352	-0.6506	0.6789	-0.1344	-0.8996	0.3443	0.9293	0.7466	-0.0637	0.4174	-0.2929	2.9696	0.612	0.2431	0.6207	1.3504	1.3727	-0.6229	-1.2975	0.9391	-0.8042	0.0434	-0.5234	-0.7808	-0.1067	2.238	-1.3391	1.3236	-0.015	-1.5446	-0.7327	1
D matrix	0.7577	0	0	0	0	0	0	0	0	0	0	0	0	0	0	0	0	0	0	0	0	0	0	0	0	0	0	0	0	0	0	0	0	0	0	0	0	0	0	0
2	0	0.7431	0	0	0	0	0	0	0	0	0	0	0	0	0	0	0	0	0	0	0	0	0	0	0	0	0	0	0	0	0	0	0	0	0	0	0	0	0	0
3	0	0	0.3922	0	0	0	0	0	0	0	0	0	0	0	0	0	0	0	0	0	0	0	0	0	0	0	0	0	0	0	0	0	0	0	0	0	0	0	0	0
4	0	0	0	0.6554	0	0	0	0	0	0	0	0	0	0	0	0	0	0	0	0	0	0	0	0	0	0	0	0	0	0	0	0	0	0	0	0	0	0	0	0
5	0	0	0	0	0.1711	0	0	0	0	0	0	0	0	0	0	0	0	0	0	0	0	0	0	0	0	0	0	0	0	0	0	0	0	0	0	0	0	0	0	0
6	0	0	0	0	0	0.706	0	0	0	0	0	0	0	0	0	0	0	0	0	0	0	0	0	0	0	0	0	0	0	0	0	0	0	0	0	0	0	0	0	0
7	0	0	0	0	0	0	0.0318	0	0	0	0	0	0	0	0	0	0	0	0	0	0	0	0	0	0	0	0	0	0	0	0	0	0	0	0	0	0	0	0	0
8	0	0	0	0	0	0	0	0.2769	0	0	0	0	0	0	0	0	0	0	0	0	0	0	0	0	0	0	0	0	0	0	0	0	0	0	0	0	0	0	0	0
9	0	0	0	0	0	0	0	0	0.0461	0	0	0	0	0	0	0	0	0	0	0	0	0	0	0	0	0	0	0	0	0	0	0	0	0	0	0	0	0	0	0
10	0	0	0	0	0	0	0	0	0	0.0971	0	0	0	0	0	0	0	0	0	0	0	0	0	0	0	0	0	0	0	0	0	0	0	0	0	0	0	0	0	0
11	0	0	0	0	0	0	0	0	0	0	0.8234	0	0	0	0	0	0	0	0	0	0	0	0	0	0	0	0	0	0	0	0	0	0	0	0	0	0	0	0	0
12	0	0	0	0	0	0	0	0	0	0	0	0.6948	0	0	0	0	0	0	0	0	0	0	0	0	0	0	0	0	0	0	0	0	0	0	0	0	0	0	0	0
13	0	0	0	0	0	0	0	0	0	0	0	0	0.317	0	0	0	0	0	0	0	0	0	0	0	0	0	0	0	0	0	0	0	0	0	0	0	0	0	0	0
14	0	0	0	0	0	0	0	0	0	0	0	0	0	0.9502	0	0	0	0	0	0	0	0	0	0	0	0	0	0	0	0	0	0	0	0	0	0	0	0	0	0
15	0	0	0	0	0	0	0	0	0	0	0	0	0	0	0.0344	0	0	0	0	0	0	0	0	0	0	0	0	0	0	0	0	0	0	0	0	0	0	0	0	0
16	0	0	0	0	0	0	0	0	0	0	0	0	0	0	0	0.4387	0	0	0	0	0	0	0	0	0	0	0	0	0	0	0	0	0	0	0	0	0	0	0	0
17	0	0	0	0	0	0	0	0	0	0	0	0	0	0	0	0	0.3815	0	0	0	0	0	0	0	0	0	0	0	0	0	0	0	0	0	0	0	0	0	0	0
18	0	0	0	0	0	0	0	0	0	0	0	0	0	0	0	0	0	0.7655	0	0	0	0	0	0	0	0	0	0	0	0	0	0	0	0	0	0	0	0	0	0
19	0	0	0	0	0	0	0	0	0	0	0	0	0	0	0	0	0	0	0.7951	0	0	0	0	0	0	0	0	0	0	0	0	0	0	0	0	0	0	0	0	0
20	0	0	0	0	0	0	0	0	0	0	0	0	0	0	0	0	0	0	0	0.1868	0	0	0	0	0	0	0	0	0	0	0	0	0	0	0	0	0	0	0	0
21	0	0	0	0	0	0	0	0	0	0	0	0	0	0	0	0	0	0	0	0	0.4897	0	0	0	0	0	0	0	0	0	0	0	0	0	0	0	0	0	0	0
22	0	0	0	0	0	0	0	0	0	0	0	0	0	0	0	0	0	0	0	0	0	0.4455	0	0	0	0	0	0	0	0	0	0	0	0	0	0	0	0	0	0
23	0	0	0	0	0	0	0	0	0	0	0	0	0	0	0	0	0	0	0	0	0	0	0.6463	0	0	0	0	0	0	0	0	0	0	0	0	0	0	0	0	0
24	0	0	0	0	0	0	0	0	0	0	0	0	0	0	0	0	0	0	0	0	0	0	0	0.7093	0	0	0	0	0	0	0	0	0	0	0	0	0	0	0	0
25	0	0	0	0	0	0	0	0	0	0	0	0	0	0	0	0	0	0	0	0	0	0	0	0	0.7546	0	0	0	0	0	0	0	0	0	0	0	0	0	0	0
26	0	0	0	0	0	0	0	0	0	0	0	0	0	0	0	0	0	0	0	0	0	0	0	0	0	0.276	0	0	0	0	0	0	0	0	0	0	0	0	0	0
27	0	0	0	0	0	0	0	0	0	0	0	0	0	0	0	0	0	0	0	0	0	0	0	0	0	0	0.6797	0	0	0	0	0	0	0	0	0	0	0	0	0
28	0	0	0	0	0	0	0	0	0	0	0	0	0	0	0	0	0	0	0	0	0	0	0	0	0	0	0	0.655	0	0	0	0	0	0	0	0	0	0	0	0
29	0	0	0	0	0	0	0	0	0	0	0	0	0	0	0	0	0	0	0	0	0	0	0	0	0	0	0	0	0.1626	0	0	0	0	0	0	0	0	0	0	0
30	0	0	0	0	0	0	0	0	0	0	0	0	0	0	0	0	0	0	0	0	0	0	0	0	0	0	0	0	0	0.1189	0	0	0	0	0	0	0	0	0	0
31	0	0	0	0	0	0	0	0	0	0	0	0	0	0	0	0	0	0	0	0	0	0	0	0	0	0	0	0	0	0	0.4983	0	0	0	0	0	0	0	0	0
32	0	0	0	0	0	0	0	0	0	0	0	0	0	0	0	0	0	0	0	0	0	0	0	0	0	0	0	0	0	0	0	0.9597	0	0	0	0	0	0	0	0
33	0	0	0	0	0	0	0	0	0	0	0	0	0	0	0	0	0	0	0	0	0	0	0	0	0	0	0	0	0	0	0	0	0.3403	0	0	0	0	0	0	0
34	0	0	0	0	0	0	0	0	0	0	0	0	0	0	0	0	0	0	0	0	0	0	0	0	0	0	0	0	0	0	0	0	0	0.5852	0	0	0	0	0	0
35	0	0	0	0	0	0	0	0	0	0	0	0	0	0	0	0	0	0	0	0	0	0	0	0	0	0	0	0	0	0	0	0	0	0	0.2238	0	0	0	0	0
36	0	0	0	0	0	0	0	0	0	0	0	0	0	0	0	0	0	0	0	0	0	0	0	0	0	0	0	0	0	0	0	0	0	0	0	0.7512	0	0	0	0
37	0	0	0	0	0	0	0	0	0	0	0	0	0	0	0	0	0	0	0	0	0	0	0	0	0	0	0	0	0	0	0	0	0	0	0	0	0.255	0	0	0
38	0	0	0	0	0	0	0	0	0	0	0	0	0	0	0	0	0	0	0	0	0	0	0	0	0	0	0	0	0	0	0	0	0	0	0	0	0	0.5059	0	0
39	0	0	0	0	0	0	0	0	0	0	0	0	0	0	0	0	0	0	0	0	0	0	0	0	0	0	0	0	0	0	0	0	0	0	0	0	0	0	0.699	0
40	0	0	0	0	0	0	0	0	0	0	0	0	0	0	0	0	0	0	0	0	0	0	0	0	0	0	0	0	0	0	0	0	0	0	0	0	0	0	0	0.8909
5-dimensional	1.97131	-0.576589	0.305186	0.306558	0.344065
2	-0.576589	2.06171	-0.0815338	0.860919	-0.00487635
3	0.305186	-0.0815338	0.4917	0.216132	0.108683
4	0.306558	0.860919	0.216132	0.736507	0.117802
5	0.344065	-0.00487635	0.108683	0.117802	0.1711
6-dimensional	2.02093	-0.776177	0.451284	0.0771176	0.409403	0.187161
2	-0.776177	2.86458	-0.669231	1.78387	-0.267706	-0.752878
3	0.451284	-0.669231	0.921892	-0.459466	0.301073	0.551104
4	0.0771176	1.78387	-0.459466	1.79751	-0.184339	-0.865485
5	0.409403	-0.267706	0.301073	-0.184339	0.257141	0.246465
6	0.187161	-0.752878	0.551104	-0.865485	0.246465	0.706
7-dimensional	2.03888	-0.751893	0.437573	0.0715287	0.419835	0.171027	0.0238945
2	-0.751893	2.89742	-0.687775	1.77631	-0.253596	-0.7747	0.0323183
3	0.437573	-0.687775	0.932362	-0.455198	0.293106	0.563424	-0.0182468
4	0.0715287	1.77631	-0.455198	1.79925	-0.187586	-0.860463	-0.00743802
5	0.419835	-0.253596	0.293106	-0.187586	0.263202	0.23709	0.0138839
6	0.171027	-0.7747	0.563424	-0.860463	0.23709	0.720497	-0.0214714
7	0.0238945	0.0323183	-0.0182468	-0.00743802	0.0138839	-0.0214714	0.0318
8-dimensional	2.0659	-0.748243	0.415264	0.0934746	0.44685	0.188345	-0.0201185	-0.0865036
2	-0.748243	2.89792	-0.690789	1.77928	-0.249947	-0.77236	0.0263729	-0.0116852
3	0.415264	-0.690789	0.950779	-0.473315	0.270804	0.549127	0.0180878	0.0714125
4	0.0934746	1.77928	-0.473315	1.81707	-0.165647	-0.846399	-0.043181	-0.0702495
5	0.44685	-0.249947	0.270804	-0.165647	0.290209	0.254403	-0.030115	-0.0864759
6	0.188345	-0.77236	0.549127	-0.846399	0.254403	0.731596	-0.0496769	-0.0554354
7	-0.0201185	0.0263729	0.0180878	-0.043181	-0.030115	-0.0496769	0.103483	0.140887
8	-0.0865036	-0.0116852	0.0714125	-0.0702495	-0.0864759	-0.0554354	0.140887	0.2769
9-dimensional	2.10658	-0.765013	0.374903	0.0683596	0.425598	0.210541	-0.0469699	-0.0975455	-0.0433017
2	-0.765013	2.90483	-0.674146	1.78963	-0.241184	-0.781513	0.0374445	-0.00713227	0.0178545
3	0.374903	-0.674146	0.990831	-0.448393	0.291894	0.527101	0.0447334	0.0823698	0.0429698
4	0.0683596	1.78963	-0.448393	1.83258	-0.152524	-0.860105	-0.0266007	-0.0634313	0.026738
5	0.425598	-0.241184	0.291894	-0.152524	0.301314	0.242805	-0.0160847	-0.0807063	0.0226259
6	0.210541	-0.781513	0.527101	-0.860105	0.242805	0.743709	-0.0643304	-0.0614612	-0.0236309
7	-0.0469699	0.0374445	0.0447334	-0.0266007	-0.0160847	-0.0643304	0.12121	0.148176	0.0285866
8	-0.0975455	-0.00713227	0.0823698	-0.0634313	-0.0807063	-0.0614612	0.148176	0.279898	0.0117555
9	-0.0433017	0.0178545	0.0429698	0.026738	0.0226259	-0.0236309	0.0285866	0.0117555	0.0461
10-dimensional	2.13232	-0.82617	0.316266	-0.031854	0.428487	0.244279	-0.0783579	-0.058448	-0.0063491	0.0499968
2	-0.82617	3.05011	-0.53485	2.0277	-0.248049	-0.86166	0.11201	-0.100013	-0.0699304	-0.118773
3	0.316266	-0.53485	1.12439	-0.220134	0.285312	0.450255	0.116227	-0.00668347	-0.0411981	-0.113879
4	-0.031854	2.0277	-0.220134	2.22269	-0.163774	-0.99144	0.0955862	-0.21563	-0.117111	-0.194627
5	0.428487	-0.248049	0.285312	-0.163774	0.301638	0.246592	-0.0196082	-0.0763174	0.026774	0.00561238
6	0.244279	-0.86166	0.450255	-0.99144	0.246592	0.787924	-0.105466	-0.0102222	0.0247972	0.0655231
7	-0.0783579	0.11201	0.116227	0.0955862	-0.0196082	-0.105466	0.15948	0.100506	-0.0164685	-0.0609594
8	-0.058448	-0.100013	-0.00668347	-0.21563	-0.0763174	-0.0102222	0.100506	0.339277	0.067877	0.0759322
9	-0.0063491	-0.0699304	-0.0411981	-0.117111	0.026774	0.0247972	-0.0164685	0.067877	0.0991427	0.0717666
10	0.0499968	-0.118773	-0.113879	-0.194627	0.00561238	0.0655231	-0.0609594	0.0759322	0.0717666	0.0971
11-dimensional	4.30741	-0.492003	-0.495396	1.45497	-0.198493	0.207745	0.0159903	0.166917	0.514373	2.06276	-1.33827
2	-0.492003	3.10145	-0.659548	2.25613	-0.344374	-0.867273	0.126505	-0.065389	0.0100697	0.190454	-0.205603
3	-0.495396	-0.659548	1.42727	-0.774958	0.519277	0.463889	0.0810194	-0.0907811	-0.235512	-0.864965	0.499392
4	1.45497	2.25613	-0.774958	3.23903	-0.592356	-1.01641	0.160079	-0.061578	0.238837	1.18123	-0.914797
5	-0.198493	-0.344374	0.519277	-0.592356	0.482368	0.257123	-0.0468045	-0.14128	-0.123326	-0.574575	0.385763
6	0.207745	-0.867273	0.463889	-1.01641	0.257123	0.788537	-0.107051	-0.0140076	0.0160507	0.0317149	0.0224788
7	0.0159903	0.126505	0.0810194	0.160079	-0.0468045	-0.107051	0.163573	0.110282	0.00611867	0.0263474	-0.0580497
8	0.166917	-0.065389	-0.0907811	-0.061578	-0.14128	-0.0140076	0.110282	0.362627	0.12183	0.284478	-0.138661
9	0.514373	0.0100697	-0.235512	0.238837	-0.123326	0.0160507	0.00611867	0.12183	0.223804	0.553626	-0.320385
10	2.06276	0.190454	-0.864965	1.18123	-0.574575	0.0317149	0.0263474	0.284478	0.553626	1.95964	-1.23839
11	-1.33827	-0.205603	0.499392	-0.914797	0.385763	0.0224788	-0.0580497	-0.138661	-0.320385	-1.23839	0.8234
12-dimensional	4.36982	-0.573005	-0.964437	1.08327	-0.354792	0.35536	-0.0706549	0.0202595	0.600643	1.95987	-1.31093	-0.208232
2	-0.573005	3.20659	-0.0507485	2.73857	-0.141504	-1.05887	0.238967	0.124967	-0.101906	0.323998	-0.24109	0.270277
3	-0.964437	-0.0507485	4.95252	2.01863	1.69399	-0.645566	0.732231	1.01147	-0.883906	-0.0916798	0.293903	1.56504
4	1.08327	2.73857	2.01863	5.45282	0.338551	-1.8956	0.676134	0.811908	-0.274986	1.79402	-1.07764	1.24022
5	-0.354792	-0.141504	1.69399	0.338551	0.873819	-0.11258	0.170199	0.226024	-0.339391	-0.316894	0.317288	0.521517
6	0.35536	-1.05887	-0.645566	-1.8956	-0.11258	1.1377	-0.311998	-0.360906	0.220112	-0.211651	0.0871498	-0.492544
7	-0.0706549	0.238967	0.732231	0.676134	0.170199	-0.311998	0.28387	0.313899	-0.113658	0.169195	-0.0960094	0.289106
8	0.0202595	0.124967	1.01147	0.811908	0.226024	-0.360906	0.313899	0.707275	-0.0809069	0.526264	-0.202912	0.489348
9	0.600643	-0.101906	-0.883906	-0.274986	-0.339391	0.220112	-0.113658	-0.0809069	0.343063	0.411396	-0.282589	-0.287856
10	1.95987	0.323998	-0.0916798	1.79402	-0.316894	-0.211651	0.169195	0.526264	0.411396	2.12927	-1.28347	0.343301
11	-1.31093	-0.24109	0.293903	-1.07764	0.317288	0.0871498	-0.0960094	-0.202912	-0.282589	-1.28347	0.835378	-0.0912272
12	-0.208232	0.270277	1.56504	1.24022	0.521517	-0.492544	0.289106	0.489348	-0.287856	0.343301	-0.0912272	0.6948
13-dimensional	4.73255	-0.715866	-0.852231	0.841634	-0.0926712	0.675059	-0.0455957	0.338839	0.652863	1.36018	-0.951084	0.74727	0.339095
2	-0.715866	3.26286	-0.0949409	2.83374	-0.244739	-1.18479	0.229098	-0.000504966	-0.122473	0.560185	-0.382816	-0.106046	-0.133552
3	-0.852231	-0.0949409	4.98723	1.94388	1.77508	-0.546671	0.739983	1.11002	-0.867752	-0.277187	0.405218	1.86061	0.104895
4	0.841634	2.83374	1.94388	5.61379	0.163935	-2.10858	0.659441	0.59968	-0.309773	2.19351	-1.31736	0.603693	-0.225894
5	-0.0926712	-0.244739	1.77508	0.163935	1.06324	0.118445	0.188307	0.45624	-0.301654	-0.750249	0.577325	1.21199	0.245041
6	0.675059	-1.18479	-0.546671	-2.10858	0.118445	1.41947	-0.289912	-0.0801201	0.266137	-0.740198	0.404308	0.349605	0.298868
7	-0.0455957	0.229098	0.739983	0.659441	0.188307	-0.289912	0.285601	0.335908	-0.11005	0.127765	-0.0711494	0.355117	0.0234263
8	0.338839	-0.000504966	1.11002	0.59968	0.45624	-0.0801201	0.335908	0.987078	-0.0350424	-0.000432972	0.113136	1.32855	0.297822
9	0.652863	-0.122473	-0.867752	-0.309773	-0.301654	0.266137	-0.11005	-0.0350424	0.350581	0.325061	-0.230784	-0.150296	0.048818
10	1.36018	0.560185	-0.277187	2.19351	-0.750249	-0.740198	0.127765	-0.000432972	0.325061	3.12072	-1.87839	-1.2364	-0.560615
11	-0.951084	-0.382816	0.405218	-1.31736	0.577325	0.404308	-0.0711494	0.113136	-0.230784	-1.87839	1.19237	0.856682	0.3364
12	0.74727	-0.106046	1.86061	0.603693	1.21199	0.349605	0.355117	1.32855	-0.150296	-1.2364	0.856682	3.21178	0.893243
13	0.339095	-0.133552	0.104895	-0.225894	0.245041	0.298868	0.0234263	0.297822	0.048818	-0.560615	0.3364	0.893243	0.317
14-dimensional	5.54205	-1.10781	-0.244095	0.349004	-0.697387	1.23022	-0.700741	0.650362	-0.103228	2.28326	-2.33066	-0.615817	0.187193	-0.877035
2	-1.10781	3.45263	-0.389389	3.07226	0.0480528	-1.45359	0.546307	-0.151339	0.243613	0.113247	0.28515	0.553936	-0.0600037	0.424644
3	-0.244095	-0.389389	5.44409	1.5738	1.32079	-0.129607	0.247808	1.34405	-1.43576	0.416272	-0.631183	0.836597	-0.00922076	-0.658869
4	0.349004	3.07226	1.5738	5.91358	0.53194	-2.44643	1.05813	0.4101	0.150353	1.63177	-0.477804	1.43321	-0.133453	0.533727
5	-0.697387	0.0480528	1.32079	0.53194	1.51497	-0.296274	0.677714	0.223527	0.263161	-1.43981	1.6079	2.23025	0.358515	0.655163
6	1.23022	-1.45359	-0.129607	-2.44643	-0.296274	1.80021	-0.739215	0.133524	-0.252396	-0.107144	-0.541815	-0.58521	0.194692	-0.601477
7	-0.700741	0.546307	0.247808	1.05813	0.677714	-0.739215	0.815821	0.0837875	0.501868	-0.619298	1.04537	1.45829	0.146364	0.709799
8	0.650362	-0.151339	1.34405	0.4101	0.223527	0.133524	0.0837875	1.10696	-0.326011	0.354797	-0.417769	0.803989	0.239365	-0.337511
9	-0.103228	0.243613	-1.43576	0.150353	0.263161	-0.252396	0.501868	-0.326011	1.05679	-0.537112	1.05777	1.12285	0.190698	0.819167
10	2.28326	0.113247	0.416272	1.63177	-1.43981	-0.107144	-0.619298	0.354797	-0.537112	4.17331	-3.45153	-2.79073	-0.733829	-1.00009
11	-2.33066	0.28515	-0.631183	-0.477804	1.6079	-0.541815	1.04537	-0.417769	1.05777	-3.45153	3.54347	3.17969	0.595276	1.49466
12	-0.615817	0.553936	0.836597	1.43321	2.23025	-0.58521	1.45829	0.803989	1.12285	-2.79073	3.17969	5.50702	1.14902	1.4768
13	0.187193	-0.0600037	-0.00922076	-0.133453	0.358515	0.194692	0.146364	0.239365	0.190698	-0.733829	0.595276	1.14902	0.345504	0.164575
14	-0.877035	0.424644	-0.658869	0.533727	0.655163	-0.601477	0.709799	-0.337511	0.819167	-1.00009	1.49466	1.4768	0.164575	0.9502
15-dimensional	5.55153	-1.10653	-0.222523	0.361049	-0.690213	1.24971	-0.669071	0.613866	-0.107316	2.31206	-2.33965	-0.628437	0.21596	-0.86411	0.0180566
2	-1.10653	3.4528	-0.38648	3.07389	0.0490204	-1.45096	0.550579	-0.156261	0.243061	0.117131	0.283936	0.552234	-0.0561234	0.426388	0.00243552
3	-0.222523	-0.38648	5.49318	1.60121	1.33712	-0.0852543	0.319889	1.26099	-1.44507	0.481823	-0.651658	0.807874	0.0562561	-0.629451	0.0410977
4	0.361049	3.07389	1.60121	5.92889	0.541058	-2.42166	1.09838	0.363717	0.145158	1.66837	-0.489237	1.41717	-0.0968915	0.550154	0.0229482
5	-0.690213	0.0490204	1.33712	0.541058	1.5204	-0.281524	0.701685	0.195903	0.260067	-1.41801	1.60109	2.2207	0.38029	0.664946	0.0136671
6	1.24971	-1.45096	-0.0852543	-2.42166	-0.281524	1.84027	-0.674102	0.0584884	-0.260801	-0.0479306	-0.56031	-0.611156	0.253839	-0.574903	0.0371245
7	-0.669071	0.550579	0.319889	1.09838	0.701685	-0.674102	0.921641	-0.0381599	0.488208	-0.523066	1.01531	1.41612	0.242488	0.752987	0.0603342
8	0.613866	-0.156261	1.26099	0.363717	0.195903	0.0584884	-0.0381599	1.24749	-0.310269	0.243898	-0.383129	0.852583	0.128591	-0.38728	-0.0695293
9	-0.107316	0.243061	-1.44507	0.145158	0.260067	-0.260801	0.488208	-0.310269	1.05855	-0.549534	1.06165	1.1283	0.17829	0.813593	-0.00778816
10	2.31206	0.117131	0.481823	1.66837	-1.41801	-0.0479306	-0.523066	0.243898	-0.549534	4.26082	-3.47886	-2.82908	-0.646414	-0.960811	0.054868
11	-2.33965	0.283936	-0.651658	-0.489237	1.60109	-0.56031	1.01531	-0.383129	1.06165	-3.47886	3.55201	3.19167	0.567972	1.4824	-0.0171381
12	-0.628437	0.552234	0.807874	1.41717	2.2207	-0.611156	1.41612	0.852583	1.1283	-2.82908	3.19167	5.52383	1.11072	1.45959	-0.0240422
13	0.21596	-0.0561234	0.0562561	-0.0968915	0.38029	0.253839	0.242488	0.128591	0.17829	-0.646414	0.567972	1.11072	0.432821	0.203805	0.0548061
14	-0.86411	0.426388	-0.629451	0.550154	0.664946	-0.574903	0.752987	-0.38728	0.813593	-0.960811	1.4824	1.45959	0.203805	0.967826	0.0246235
15	0.0180566	0.00243552	0.0410977	0.0229482	0.0136671	0.0371245	0.0603342	-0.0695293	-0.00778816	0.054868	-0.0171381	-0.0240422	0.0548061	0.0246235	0.0344
16-dimensional	5.62186	-1.17007	-0.31353	0.259696	-0.901105	1.10994	-0.625228	0.772325	0.0341217	2.33172	-2.33706	-0.586736	0.219614	-0.902051	0.369894	0.175655
2	-1.17007	3.5102	-0.304269	3.16544	0.239529	-1.3247	0.510973	-0.299405	0.115294	0.0993754	0.281588	0.514564	-0.0594239	0.460662	-0.315396	-0.158678
3	-0.31353	-0.304269	5.61094	1.73236	1.61	0.0956008	0.263158	1.05595	-1.62808	0.456389	-0.655022	0.753915	0.0515284	-0.580356	-0.414165	-0.22729
4	0.259696	3.16544	1.73236	6.07495	0.844965	-2.22025	1.0352	0.135369	-0.0586627	1.64004	-0.492983	1.35708	-0.102157	0.60483	-0.484071	-0.25313
5	-0.901105	0.239529	1.61	0.844965	2.15276	0.137574	0.57022	-0.279236	-0.164034	-1.47695	1.59329	2.09566	0.369334	0.778714	-1.04132	-0.526703
6	1.10994	-1.3247	0.0956008	-2.22025	0.137574	2.11803	-0.761231	-0.256411	-0.541875	-0.0869919	-0.565476	-0.694026	0.246578	-0.499503	-0.66207	-0.349074
7	-0.625228	0.510973	0.263158	1.0352	0.57022	-0.761231	0.948972	0.0606196	0.576377	-0.510813	1.01693	1.44211	0.244766	0.729335	0.279662	0.1095
8	0.772325	-0.299405	1.05595	0.135369	-0.279236	-0.256411	0.0606196	1.6045	0.00838968	0.288183	-0.377272	0.946535	0.136822	-0.472762	0.723161	0.395751
9	0.0341217	0.115294	-1.62808	-0.0586627	-0.164034	-0.541875	0.576377	0.00838968	1.34298	-0.510007	1.06687	1.21216	0.185637	0.737293	0.699754	0.353241
10	2.33172	0.0993754	0.456389	1.64004	-1.47695	-0.0869919	-0.510813	0.288183	-0.510007	4.26631	-3.47814	-2.81742	-0.645393	-0.971415	0.153196	0.0490905
11	-2.33706	0.281588	-0.655022	-0.492983	1.59329	-0.565476	1.01693	-0.377272	1.06687	-3.47814	3.55211	3.19321	0.568107	1.48099	-0.00413308	0.00649276
12	-0.586736	0.514564	0.753915	1.35708	2.09566	-0.694026	1.44211	0.946535	1.21216	-2.81742	3.19321	5.54855	1.11289	1.4371	0.184565	0.104147
13	0.219614	-0.0594239	0.0515284	-0.102157	0.369334	0.246578	0.244766	0.136822	0.185637	-0.645393	0.568107	1.11289	0.433011	0.201834	0.0730834	0.00912496
14	-0.902051	0.460662	-0.580356	0.60483	0.778714	-0.499503	0.729335	-0.472762	0.737293	-0.971415	1.48099	1.4371	0.201834	0.988294	-0.165179	-0.0947592
15	0.369894	-0.315396	-0.414165	-0.484071	-1.04132	-0.66207	0.279662	0.723161	0.699754	0.153196	-0.00413308	0.184565	0.0730834	-0.165179	1.79447	0.878716
16	0.175655	-0.158678	-0.22729	-0.25313	-0.526703	-0.349074	0.1095	0.395751	0.353241	0.0490905	0.00649276	0.104147	0.00912496	-0.0947592	0.878716	0.4387
17-dimensional	5.76559	-0.838679	-0.332802	0.0825737	-0.691972	1.78501	-0.141935	0.894582	0.0765524	2.45002	-2.33474	-0.848907	0.0722072	-1.04562	0.223378	0.195208	-0.234165
2	-0.838679	4.27426	-0.348702	2.75707	0.721713	0.231777	1.62527	-0.0175234	0.213124	0.372132	0.286933	-0.0899066	-0.39929	0.12965	-0.653211	-0.113596	-0.539899
3	-0.332802	-0.348702	5.61353	1.75611	1.58196	0.00508506	0.198357	1.03956	-1.63377	0.440527	-0.655332	0.789068	0.0712931	-0.561106	-0.39452	-0.229912	0.0313975
4	0.0825737	2.75707	1.75611	6.29322	0.587247	-3.05215	0.43963	-0.0152921	-0.110951	1.49426	-0.49584	1.68016	0.0794961	0.78175	-0.303515	-0.277225	0.288567
5	-0.691972	0.721713	1.58196	0.587247	2.45705	1.11983	1.27343	-0.101348	-0.102296	-1.30482	1.59667	1.71419	0.154852	0.56982	-1.25451	-0.498253	-0.340718
6	1.78501	0.231777	0.00508506	-3.05215	1.11983	5.28872	1.5087	0.317808	-0.342586	0.46864	-0.554588	-1.92539	-0.445763	-1.17381	-1.35023	-0.257238	-1.09983
7	-0.141935	1.62527	0.198357	0.43963	1.27343	1.5087	2.57404	0.47171	0.71905	-0.113029	1.02472	0.560567	-0.250889	0.246593	-0.213001	0.175246	-0.787378
8	0.894582	-0.0175234	1.03956	-0.0152921	-0.101348	0.317808	0.47171	1.70849	0.0444813	0.388809	-0.3753	0.723532	0.0114376	-0.59488	0.598533	0.412383	-0.199181
9	0.0765524	0.213124	-1.63377	-0.110951	-0.102296	-0.342586	0.71905	0.0444813	1.3555	-0.475083	1.06756	1.13476	0.142121	0.69491	0.656501	0.359013	-0.0691278
10	2.45002	0.372132	0.440527	1.49426	-1.30482	0.46864	-0.113029	0.388809	-0.475083	4.36368	-3.47623	-3.03321	-0.766718	-1.08958	0.0326028	0.0651838	-0.192734
11	-2.33474	0.286933	-0.655332	-0.49584	1.59667	-0.554588	1.02472	-0.3753	1.06756	-3.47623	3.55215	3.18898	0.565729	1.47868	-0.00649626	0.00680813	-0.00377685
12	-0.848907	-0.0899066	0.789068	1.68016	1.71419	-1.92539	0.560567	0.723532	1.13476	-3.03321	3.18898	6.02676	1.38176	1.69897	0.451819	0.0684822	0.427127
13	0.0722072	-0.39929	0.0712931	0.0794961	0.154852	-0.445763	-0.250889	0.0114376	0.142121	-0.766718	0.565729	1.38176	0.584188	0.349072	0.223348	-0.0109279	0.240154
14	-1.04562	0.12965	-0.561106	0.78175	0.56982	-1.17381	0.246593	-0.59488	0.69491	-1.08958	1.47868	1.69897	0.349072	1.1317	-0.0188294	-0.11429	0.233898
15	0.223378	-0.653211	-0.39452	-0.303515	-1.25451	-1.35023	-0.213001	0.598533	0.656501	0.0326028	-0.00649626	0.451819	0.223348	-0.0188294	1.94383	0.858784	0.238705
16	0.195208	-0.113596	-0.229912	-0.277225	-0.498253	-0.257238	0.175246	0.412383	0.359013	0.0651838	0.00680813	0.0684822	-0.0109279	-0.11429	0.858784	0.44136	-0.0318553
17	-0.234165	-0.539899	0.0313975	0.288567	-0.340718	-1.09983	-0.787378	-0.199181	-0.0691278	-0.192734	-0.00377685	0.427127	0.240154	0.233898	0.238705	-0.0318553	0.3815
18-dimensional	8.31491	-2.23885	1.50211	0.291419	-0.994554	3.17387	-0.938063	1.97946	0.869188	2.23265	-2.78023	-0.316106	2.3825	-1.2208	-0.000694903	2.20809	-0.0412444	1.39696
2	-2.23885	5.04329	-1.3565	2.64236	0.887901	-0.531034	2.06253	-0.613378	-0.22222	0.491518	0.531612	-0.38254	-1.66819	0.225865	-0.530142	-1.21914	-0.645857	-0.767261
3	1.50211	-1.3565	6.93423	1.90643	1.36417	1.00474	-0.374669	1.82041	-1.06326	0.284074	-0.975981	1.17256	1.73416	-0.687194	-0.555799	1.21889	0.170255	1.00548
4	0.291419	2.64236	1.90643	6.31033	0.562458	-2.93838	0.374409	0.0735838	-0.0460164	1.47645	-0.532335	1.72381	0.268761	0.767399	-0.321871	-0.112325	0.304371	0.114442
5	-0.994554	0.887901	1.36417	0.562458	2.49297	0.954983	1.36792	-0.230114	-0.196375	-1.27902	1.64954	1.65095	-0.11936	0.590612	-1.22791	-0.737165	-0.363616	-0.165807
6	3.17387	-0.531034	1.00474	-2.93838	0.954983	6.04537	1.07497	0.908848	0.0892392	0.350219	-0.79729	-1.63512	0.812878	-1.26924	-1.47231	0.839373	-0.994724	0.76106
7	-0.938063	2.06253	-0.374669	0.374409	1.36792	1.07497	2.82266	0.132911	0.471517	-0.0451474	1.16385	0.394178	-0.972373	0.3013	-0.143025	-0.453359	-0.847625	-0.436258
8	1.97946	-0.613378	1.82041	0.0735838	-0.230114	0.908848	0.132911	2.17017	0.381793	0.296307	-0.564882	0.950269	0.994601	-0.669429	0.503177	1.26898	-0.117082	0.594487
9	0.869188	-0.22222	-1.06326	-0.0460164	-0.196375	0.0892392	0.471517	0.381793	1.60195	-0.542667	0.929046	1.30042	0.86044	0.640443	0.586832	0.984861	-0.0091448	0.434345
10	2.23265	0.491518	0.284074	1.47645	-1.27902	0.350219	-0.0451474	0.296307	-0.542667	4.38222	-3.43824	-3.07864	-0.963706	-1.07464	0.0517083	-0.106444	-0.209183	-0.119112
11	-2.78023	0.531612	-0.975981	-0.532335	1.64954	-0.79729	1.16385	-0.564882	0.929046	-3.43824	3.62999	3.09587	0.162007	1.50929	0.0326603	-0.344941	-0.0374895	-0.244118
12	-0.316106	-0.38254	1.17256	1.72381	1.65095	-1.63512	0.394178	0.950269	1.30042	-3.07864	3.09587	6.13812	1.86461	1.66236	0.404988	0.48917	0.467447	0.291962
13	2.3825	-1.66819	1.73416	0.268761	-0.11936	0.812878	-0.972373	0.994601	0.86044	-0.963706	0.162007	1.86461	2.67787	0.190318	0.0202841	1.81323	0.414987	1.26598
14	-1.2208	0.225865	-0.687194	0.767399	0.590612	-1.26924	0.3013	-0.669429	0.640443	-1.07464	1.50929	1.66236	0.190318	1.14373	-0.00343201	-0.252607	0.220641	-0.0959937
15	-0.000694903	-0.530142	-0.555799	-0.321871	-1.22791	-1.47231	-0.143025	0.503177	0.586832	0.0517083	0.0326603	0.404988	0.0202841	-0.00343201	1.96352	0.681862	0.221748	-0.122786
16	2.20809	-1.21914	1.21889	-0.112325	-0.737165	0.839373	-0.453359	1.26898	0.984861	-0.106444	-0.344941	0.48917	1.81323	-0.252607	0.681862	2.03069	0.12047	1.10301
17	-0.0412444	-0.645857	0.170255	0.304371	-0.363616	-0.994724	-0.847625	-0.117082	-0.0091448	-0.209183	-0.0374895	0.467447	0.414987	0.220641	0.221748	0.12047	0.396099	0.105716
18	1.39696	-0.767261	1.00548	0.114442	-0.165807	0.76106	-0.436258	0.594487	0.434345	-0.119112	-0.244118	0.291962	1.26598	-0.0959937	-0.122786	1.10301	0.105716	0.7655
19-dimensional	99.6248	-17.4841	8.20758	6.76674	-13.2373	30.7281	-12.5419	16.7375	0.974204	12.7764	-21.1914	-15.9456	48.7452	-19.4861	5.30489	34.8838	3.48359	23.7646	11.4455
2	-17.4841	51.8928	-15.5932	27.5704	7.89916	-5.61118	19.6843	-7.04379	-4.51954	2.07238	7.28401	-7.63102	-9.26379	0.0921331	-3.72023	-8.38035	-5.29883	-4.75689	3.407
3	8.20758	-15.5932	72.16	17.4711	15.003	10.4653	-2.43937	19.4684	-7.44098	6.79015	-12.4937	17.0126	7.03597	-3.86208	-7.75469	6.89431	0.0913567	6.00414	-4.73323
4	6.76674	27.5704	17.4711	64.0041	4.85488	-29.6201	3.0049	0.0209964	-2.2648	12.5314	-3.77752	14.2486	8.51473	5.97213	-1.97664	1.87046	3.95473	3.43481	2.67631
5	-13.2373	7.89916	15.003	4.85488	25.5873	9.75175	14.3108	-1.69036	-0.421825	-10.8821	15.1746	19.0638	-6.17244	7.36024	-13.3404	-9.92956	-4.41455	-3.61504	-2.28671
6	30.7281	-5.61118	10.4653	-29.6201	9.75175	60.5157	10.9436	9.276	1.3658	4.088	-8.37842	-15.567	6.60016	-12.246	-15.0489	7.60839	-10.1862	7.00977	-0.702073
7	-12.5419	19.6843	-2.43937	3.0049	14.3108	10.9436	28.8332	1.91568	6.19598	1.38092	10.37	6.39478	-14.5052	4.40948	-2.44944	-6.99011	-9.22379	-6.24198	-2.19607
8	16.7375	-7.04379	19.4684	0.0209964	-1.69036	9.276	1.91568	22.269	5.24995	4.73509	-6.87548	11.8749	5.32205	-5.34382	4.04616	10.3142	-1.89374	4.1274	-2.12371
9	0.974204	-4.51954	-7.44098	-2.2648	-0.421825	1.3658	6.19598	5.24995	19.6347	-0.953155	6.19374	18.9928	-3.06888	9.81372	3.38011	3.85139	-1.91645	-0.244804	-5.36136
10	12.7764	2.07238	6.79015	12.5314	-10.8821	4.088	1.38092	4.73509	-0.953155	49.3578	-38.2144	-23.3759	-24.0819	-6.52767	-2.5619	-8.48559	-4.35015	-6.86876	-6.63431
11	-21.1914	7.28401	-12.4937	-3.77752	15.1746	-8.37842	10.37	-6.87548	6.19374	-38.2144	38.9526	25.8289	11.6193	12.1725	2.45798	1.68775	1.18839	1.48908	4.5925
12	-15.9456	-7.63102	17.0126	14.2486	19.0638	-15.567	6.39478	11.8749	18.9928	-23.3759	25.8289	71.3015	-0.691085	22.2712	-0.071916	-5.04289	1.65129	-4.68097	-8.88127
13	48.7452	-9.26379	7.03597	8.51473	-6.17244	6.60016	-14.5052	5.32205	-3.06888	-24.0819	11.6193	-0.691085	64.4715	-9.10534	8.23721	37.4972	10.0428	27.4752	17.3117
14	-19.4861	0.0921331	-3.86208	5.97213	7.36024	-12.246	4.40948	-5.34382	9.81372	-6.52767	12.1725	22.2712	-9.10534	14.6525	-2.38083	-8.18176	0.485333	-5.2869	-5.05604
15	5.30489	-3.72023	-7.75469	-1.97664	-13.3404	-15.0489	-2.44944	4.04616	3.38011	-2.5619	2.45798	-0.071916	8.23721	-2.38083	21.3478	10.9463	3.47357	1.93009	3.69006
16	34.8838	-8.38035	6.89431	1.87046	-9.92956	7.60839	-6.99011	10.3142	3.85139	-8.48559	1.68775	-5.04289	37.4972	-8.18176	10.9463	30.2557	4.23222	18.6416	8.89399
17	3.48359	-5.29883	0.0913567	3.95473	-4.41455	-10.1862	-9.22379	-1.89374	-1.91645	-4.35015	1.18839	1.65129	10.0428	0.485333	3.47357	4.23222	4.88229	3.3734	2.70652
18	23.7646	-4.75689	6.00414	3.43481	-3.61504	7.00977	-6.24198	4.1274	-0.244804	-6.86876	1.48908	-4.68097	27.4752	-5.2869	1.93009	18.6416	3.3734	13.4783	6.80447
19	11.4455	3.407	-4.73323	2.67631	-2.28671	-0.702073	-2.19607	-2.12371	-5.36136	-6.63431	4.5925	-8.88127	17.3117	-5.05604	3.69006	8.89399	2.70652	6.80447	7.951
20-dimensional	99.6315	-17.3694	8.48189	7.06913	-13.2938	30.7314	-12.448	17.0028	1.00576	12.779	-21.3791	-15.868	49.013	-19.6184	5.28797	34.8079	3.42919	23.9548	11.5328	0.11152	0	0	0	0	0	0	0	0	0	0	0	0	0	0	0	0	0	0	0	0
2	-17.3694	53.8703	-10.8657	32.7821	6.92452	-5.55428	21.3017	-2.47158	-3.97562	2.11677	4.04854	-6.29351	-4.6491	-2.18715	-4.0118	-9.68903	-6.23638	-1.47972	4.91211	1.92199	0	0	0	0	0	0	0	0	0	0	0	0	0	0	0	0	0	0	0	0
3	8.48189	-10.8657	83.4616	29.9301	12.673	10.6013	1.42709	30.3988	-6.14067	6.89628	-20.2285	20.2101	18.0679	-9.31096	-8.45171	3.76576	-2.14995	13.8386	-1.13511	4.59472	0	0	0	0	0	0	0	0	0	0	0	0	0	0	0	0	0	0	0	0
4	7.06913	32.7821	29.9301	77.7391	2.28628	-29.4701	7.26732	12.0708	-0.831327	12.6484	-12.3044	17.7736	20.6764	-0.0347769	-2.74504	-1.57848	1.48389	12.0716	6.64292	5.06527	0	0	0	0	0	0	0	0	0	0	0	0	0	0	0	0	0	0	0	0
5	-13.2938	6.92452	12.673	2.28628	26.0677	9.72371	13.5137	-3.9438	-0.689901	-10.904	16.7692	18.4046	-8.44682	8.4836	-13.1967	-9.28457	-3.95248	-5.23022	-3.02851	-0.947263	0	0	0	0	0	0	0	0	0	0	0	0	0	0	0	0	0	0	0	0
6	30.7314	-5.55428	10.6013	-29.4701	9.72371	60.5173	10.9902	9.40754	1.38145	4.08928	-8.4715	-15.5285	6.73292	-12.3116	-15.0573	7.57075	-10.2132	7.10405	-0.658774	0.0552928	0	0	0	0	0	0	0	0	0	0	0	0	0	0	0	0	0	0	0	0
7	-12.448	21.3017	1.42709	7.26732	13.5137	10.9902	30.156	5.65513	6.64083	1.41723	7.72383	7.48868	-10.731	2.54534	-2.6879	-8.06043	-9.99058	-3.56169	-0.965094	1.57192	0	0	0	0	0	0	0	0	0	0	0	0	0	0	0	0	0	0	0	0
8	17.0028	-2.47158	30.3988	12.0708	-3.9438	9.40754	5.65513	32.8403	6.50754	4.83775	-14.3561	14.9673	15.9916	-10.6137	3.37203	7.28844	-4.06141	11.7045	1.35622	4.44379	0	0	0	0	0	0	0	0	0	0	0	0	0	0	0	0	0	0	0	0
9	1.00576	-3.97562	-6.14067	-0.831327	-0.689901	1.38145	6.64083	6.50754	19.7843	-0.940944	5.30382	19.3607	-1.79961	9.1868	3.29992	3.49144	-2.17433	0.656587	-4.94738	0.528644	0	0	0	0	0	0	0	0	0	0	0	0	0	0	0	0	0	0	0	0
10	12.779	2.11677	6.89628	12.6484	-10.904	4.08928	1.41723	4.83775	-0.940944	49.3588	-38.2871	-23.3458	-23.9783	-6.57884	-2.56845	-8.51497	-4.3712	-6.79519	-6.60052	0.0431508	0	0	0	0	0	0	0	0	0	0	0	0	0	0	0	0	0	0	0	0
11	-21.3791	4.04854	-20.2285	-12.3044	16.7692	-8.4715	7.72383	-14.3561	5.30382	-38.2871	44.2462	23.6406	4.06915	15.9017	2.93502	3.82891	2.72232	-3.87276	2.12997	-3.14459	0	0	0	0	0	0	0	0	0	0	0	0	0	0	0	0	0	0	0	0
12	-15.868	-6.29351	20.2101	17.7736	18.4046	-15.5285	7.48868	14.9673	19.3607	-23.3458	23.6406	72.2062	2.43007	20.7296	-0.269117	-5.92802	1.01718	-2.46444	-7.86328	1.29994	0	0	0	0	0	0	0	0	0	0	0	0	0	0	0	0	0	0	0	0
13	49.013	-4.6491	18.0679	20.6764	-8.44682	6.73292	-10.731	15.9916	-1.79961	-23.9783	4.06915	2.43007	75.2402	-14.4242	7.55682	34.4433	7.85496	35.1227	20.824	4.48507	0	0	0	0	0	0	0	0	0	0	0	0	0	0	0	0	0	0	0	0
14	-19.6184	-2.18715	-9.31096	-0.0347769	8.4836	-12.3116	2.54534	-10.6137	9.1868	-6.57884	15.9017	20.7296	-14.4242	17.2796	-2.04477	-6.67339	1.56594	-9.06414	-6.79081	-2.21526	0	0	0	0	0	0	0	0	0	0	0	0	0	0	0	0	0	0	0	0
15	5.28797	-4.0118	-8.45171	-2.74504	-13.1967	-15.0573	-2.6879	3.37203	3.29992	-2.56845	2.93502	-0.269117	7.55682	-2.04477	21.3908	11.1393	3.6118	1.44691	3.46815	-0.283376	0	0	0	0	0	0	0	0	0	0	0	0	0	0	0	0	0	0	0	0
16	34.8079	-9.68903	3.76576	-1.57848	-9.28457	7.57075	-8.06043	7.28844	3.49144	-8.51497	3.82891	-5.92802	34.4433	-6.67339	11.1393	31.1217	4.85266	16.4728	7.89795	-1.27192	0	0	0	0	0	0	0	0	0	0	0	0	0	0	0	0	0	0	0	0
17	3.42919	-6.23638	-2.14995	1.48389	-3.95248	-10.2132	-9.99058	-4.06141	-2.17433	-4.3712	2.72232	1.01718	7.85496	1.56594	3.6118	4.85266	5.32678	1.81969	1.99295	-0.91121	0	0	0	0	0	0	0	0	0	0	0	0	0	0	0	0	0	0	0	0
18	23.9548	-1.47972	13.8386	12.0716	-5.23022	7.10405	-3.56169	11.7045	0.656587	-6.79519	-3.87276	-2.46444	35.1227	-9.06414	1.44691	16.4728	1.81969	18.9092	9.29874	3.18513	0	0	0	0	0	0	0	0	0	0	0	0	0	0	0	0	0	0	0	0
19	11.5328	4.91211	-1.13511	6.64292	-3.02851	-0.658774	-0.965094	1.35622	-4.94738	-6.60052	2.12997	-7.86328	20.824	-6.79081	3.46815	7.89795	1.99295	9.29874	9.09654	1.46283	0	0	0	0	0	0	0	0	0	0	0	0	0	0	0	0	0	0	0	0
20	0.11152	1.92199	4.59472	5.06527	-0.947263	0.0552928	1.57192	4.44379	0.528644	0.0431508	-3.14459	1.29994	4.48507	-2.21526	-0.283376	-1.27192	-0.91121	3.18513	1.46283	1.868	0	0	0	0	0	0	0	0	0	0	0	0	0	0	0	0	0	0	0	0
21-dimensional	102.363	-20.4944	2.94908	11.0636	-15.2137	37.9006	-13.2245	21.1626	2.31042	16.0832	-20.5207	-19.7238	53.7214	-21.825	5.91525	37.4347	5.29163	17.3104	9.43628	-5.89604	3.65757	0	0	0	0	0	0	0	0	0	0	0	0	0	0	0	0	0	0	0
2	-20.4944	57.4451	-4.53654	28.2127	9.1207	-13.7553	22.1899	-7.23004	-5.46805	-1.66305	3.06655	-1.88274	-10.0352	0.337056	-4.72935	-12.694	-8.36687	6.12093	7.31038	8.7942	-4.184	0	0	0	0	0	0	0	0	0	0	0	0	0	0	0	0	0	0	0
3	2.94908	-4.53654	94.6673	21.8402	16.5613	-3.91849	2.99974	21.974	-8.783	0.204174	-21.9671	28.0193	8.53197	-4.8419	-9.72212	-1.55444	-5.92194	27.2954	3.11098	16.7619	-7.40769	0	0	0	0	0	0	0	0	0	0	0	0	0	0	0	0	0	0	0
4	11.0636	28.2127	21.8402	83.5797	-0.520893	-18.9875	6.13194	18.1531	1.07631	17.4798	-11.0492	12.1357	27.5609	-3.26123	-1.82786	2.26246	4.2071	2.35639	3.57744	-3.71884	5.34801	0	0	0	0	0	0	0	0	0	0	0	0	0	0	0	0	0	0	0
5	-15.2137	9.1207	16.5613	-0.520893	27.4169	4.6854	14.0594	-6.86716	-1.60678	-13.2261	16.166	21.1143	-11.7557	10.0343	-13.6375	-11.1307	-5.26134	-0.560762	-1.55514	3.27468	-2.57044	0	0	0	0	0	0	0	0	0	0	0	0	0	0	0	0	0	0	0
6	37.9006	-13.7553	-3.91849	-18.9875	4.6854	79.3315	8.95238	20.324	4.80527	12.7607	-6.2187	-25.6474	19.0892	-18.1024	-13.4111	14.4645	-5.32559	-10.3328	-6.1607	-15.7104	9.59861	0	0	0	0	0	0	0	0	0	0	0	0	0	0	0	0	0	0	0
7	-13.2245	22.1899	2.99974	6.13194	14.0594	8.95238	30.3767	4.47275	6.26999	0.47803	7.47983	8.58466	-12.0694	3.17255	-2.8662	-8.8071	-10.52	-1.6731	-0.369176	3.27952	-1.03963	0	0	0	0	0	0	0	0	0	0	0	0	0	0	0	0	0	0	0
8	21.1626	-7.23004	21.974	18.1531	-6.86716	20.324	4.47275	39.1743	8.49413	9.8691	-13.049	9.09609	23.161	-13.9737	4.32718	11.2884	-1.2255	1.5872	-1.83614	-4.70389	5.56936	0	0	0	0	0	0	0	0	0	0	0	0	0	0	0	0	0	0	0
9	2.31042	-5.46805	-8.783	1.07631	-1.60678	4.80527	6.26999	8.49413	20.4074	0.637079	5.71379	17.5193	0.448995	8.13298	3.59949	4.74596	-1.28488	-2.51658	-5.94862	-2.34041	1.74676	0	0	0	0	0	0	0	0	0	0	0	0	0	0	0	0	0	0	0
10	16.0832	-1.66305	0.204174	17.4798	-13.2261	12.7607	0.47803	9.8691	0.637079	53.3554	-37.2488	-28.0096	-18.2834	-9.24781	-1.80974	-5.33769	-2.11853	-14.8317	-9.13633	-7.22319	4.42395	0	0	0	0	0	0	0	0	0	0	0	0	0	0	0	0	0	0	0
11	-20.5207	3.06655	-21.9671	-11.0492	16.166	-6.2187	7.47983	-13.049	5.71379	-37.2488	44.5159	22.429	5.54868	15.2083	3.13212	4.65435	3.30756	-5.96063	1.47117	-5.03236	1.14933	0	0	0	0	0	0	0	0	0	0	0	0	0	0	0	0	0	0	0
12	-19.7238	-1.88274	28.0193	12.1357	21.1143	-25.6474	8.58466	9.09609	17.5193	-28.0096	22.429	77.6484	-4.21551	23.844	-1.15447	-9.63566	-1.61152	6.91361	-4.90419	9.77921	-5.16242	0	0	0	0	0	0	0	0	0	0	0	0	0	0	0	0	0	0	0
13	53.7214	-10.0352	8.53197	27.5609	-11.7557	19.0892	-12.0694	23.161	0.448995	-18.2834	5.54868	-4.21551	83.3552	-18.2273	8.63794	38.9707	11.0649	23.671	17.2106	-5.8691	6.30391	0	0	0	0	0	0	0	0	0	0	0	0	0	0	0	0	0	0	0
14	-21.825	0.337056	-4.8419	-3.26123	10.0343	-18.1024	3.17255	-13.9737	8.13298	-9.24781	15.2083	23.844	-18.2273	19.0619	-2.55145	-8.79521	0.0615771	-3.69725	-5.09737	2.63728	-2.95436	0	0	0	0	0	0	0	0	0	0	0	0	0	0	0	0	0	0	0
15	5.91525	-4.72935	-9.72212	-1.82786	-13.6375	-13.4111	-2.8662	4.32718	3.59949	-1.80974	3.13212	-1.15447	8.63794	-2.55145	21.5348	11.7424	4.03945	-0.0787383	2.98675	-1.66281	0.839836	0	0	0	0	0	0	0	0	0	0	0	0	0	0	0	0	0	0	0
16	37.4347	-12.694	-1.55444	2.26246	-11.1307	14.4645	-8.8071	11.2884	4.74596	-5.33769	4.65435	-9.63566	38.9707	-8.79521	11.7424	33.6476	6.64353	10.0838	5.88199	-7.04864	3.51703	0	0	0	0	0	0	0	0	0	0	0	0	0	0	0	0	0	0	0
17	5.29163	-8.36687	-5.92194	4.2071	-5.26134	-5.32559	-10.52	-1.2255	-1.28488	-2.11853	3.30756	-1.61152	11.0649	0.0615771	4.03945	6.64353	6.5965	-2.7101	0.563647	-5.00687	2.49355	0	0	0	0	0	0	0	0	0	0	0	0	0	0	0	0	0	0	0
18	17.3104	6.12093	27.2954	2.35639	-0.560762	-10.3328	-1.6731	1.5872	-2.51658	-14.8317	-5.96063	6.91361	23.671	-3.69725	-0.0787383	10.0838	-2.7101	35.0695	14.3979	17.7966	-8.89589	0	0	0	0	0	0	0	0	0	0	0	0	0	0	0	0	0	0	0
19	9.43628	7.31038	3.11098	3.57744	-1.55514	-6.1607	-0.369176	-1.83614	-5.94862	-9.13633	1.47117	-4.90419	17.2106	-5.09737	2.98675	5.88199	0.563647	14.3979	10.7055	6.07326	-2.80696	0	0	0	0	0	0	0	0	0	0	0	0	0	0	0	0	0	0	0
20	-5.89604	8.7942	16.7619	-3.71884	3.27468	-15.7104	3.27952	-4.70389	-2.34041	-7.22319	-5.03236	9.77921	-5.8691	2.63728	-1.66281	-7.04864	-5.00687	17.7966	6.07326	15.0792	-8.04332	0	0	0	0	0	0	0	0	0	0	0	0	0	0	0	0	0	0	0
21	3.65757	-4.184	-7.40769	5.34801	-2.57044	9.59861	-1.03963	5.56936	1.74676	4.42395	1.14933	-5.16242	6.30391	-2.95436	0.839836	3.51703	2.49355	-8.89589	-2.80696	-8.04332	4.897	0	0	0	0	0	0	0	0	0	0	0	0	0	0	0	0	0	0	0
22-dimensional	1154.25	-107.706	120.74	50.7612	-95.7254	409.992	-159.181	240.316	-106.539	146.468	-270.703	-182.287	497.104	-188.744	-40.9537	406.645	99.0751	285.027	18.5604	-213.838	65.0674	-76.283	0	0	0	0	0	0	0	0	0	0	0	0	0	0	0	0	0	0
2	-107.706	646.839	22.5643	237.554	133.202	-114.486	201.847	-50.9425	-151.192	-27.3236	-18.0925	-7.697	-130.211	25.3361	-121.816	-102.896	-49.3063	144.529	16.6736	-27.3544	-20.6297	-56.7879	0	0	0	0	0	0	0	0	0	0	0	0	0	0	0	0	0	0
3	120.74	22.5643	1010.42	176.574	205.022	-17.5383	11.1804	239.783	-178.398	-7.9929	-265.426	290.638	57.2994	-27.8061	-167.155	7.01889	-26.9732	351.142	-21.8451	59.4224	-54.1728	-53.2907	0	0	0	0	0	0	0	0	0	0	0	0	0	0	0	0	0	0
4	50.7612	237.554	176.574	863.243	-31.0672	-204.079	73.6663	168.379	70.19	181.382	-80.4692	114.503	293.995	-46.1377	27.609	7.81949	20.9122	-27.7401	70.5214	33.8057	40.4199	34.9673	0	0	0	0	0	0	0	0	0	0	0	0	0	0	0	0	0	0
5	-95.7254	133.202	205.022	-31.0672	298.532	60.2361	128.961	-56.281	-72.0573	-138.465	133.373	217.6	-134.88	113.086	-179.608	-97.3578	-32.6786	42.7289	-48.2885	-34.1409	-13.3995	-32.9447	0	0	0	0	0	0	0	0	0	0	0	0	0	0	0	0	0	0
6	409.992	-114.486	-17.5383	-204.079	60.2361	800.666	83.1341	210.046	17.2982	124.199	-77.7245	-252.927	181.377	-174.024	-157.859	152.307	-42.3058	-76.7771	-79.5892	-193.845	102.745	-18.0962	0	0	0	0	0	0	0	0	0	0	0	0	0	0	0	0	0	0
7	-159.181	201.847	11.1804	73.6663	128.961	83.1341	309.321	38.8112	89.4341	7.74238	88.3046	82.7634	-112.422	25.6409	-8.01872	-94.7313	-114.718	-39.8109	11.9397	64.733	-16.2717	15.7306	0	0	0	0	0	0	0	0	0	0	0	0	0	0	0	0	0	0
8	240.316	-50.9425	239.783	168.379	-56.281	210.046	38.8112	398.045	56.4658	95.536	-144.876	94.2449	222.8	-133.256	21.2839	119.978	-2.11637	40.4553	-35.0111	-81.057	61.9517	-16.7553	0	0	0	0	0	0	0	0	0	0	0	0	0	0	0	0	0	0
9	-106.539	-151.192	-178.398	70.19	-72.0573	17.2982	89.4341	56.4658	332.747	20.6275	122.145	160.353	44.2997	52.0442	135.353	15.4028	-58.6625	-136.251	15.7495	130.315	-10.8111	75.7127	0	0	0	0	0	0	0	0	0	0	0	0	0	0	0	0	0	0
10	146.468	-27.3236	-7.9929	181.382	-138.465	124.199	7.74238	95.536	20.6275	535.134	-365.285	-281.74	-178.423	-95.7229	-7.08883	-56.9287	-26.2613	-160.625	-83.0274	-55.2002	41.1063	8.38876	0	0	0	0	0	0	0	0	0	0	0	0	0	0	0	0	0	0
11	-270.703	-18.0925	-265.426	-80.4692	133.373	-77.7245	88.3046	-144.876	122.145	-365.285	478.001	216.793	75.599	137.288	81.5175	30.3482	9.93014	-115.728	52.7214	27.3367	-2.79335	38.2506	0	0	0	0	0	0	0	0	0	0	0	0	0	0	0	0	0	0
12	-182.287	-7.697	290.638	114.503	217.6	-252.927	82.7634	94.2449	160.353	-281.74	216.793	778.195	-46.7462	241.818	-23.0035	-92.6596	-10.8316	81.9474	-57.7186	80.0639	-48.3628	-8.7318	0	0	0	0	0	0	0	0	0	0	0	0	0	0	0	0	0	0		10
13	497.104	-130.211	57.2994	293.995	-134.88	181.377	-112.422	222.8	44.2997	-178.423	75.599	-46.7462	845.868	-191.334	117.119	379.79	96.475	202.342	195.383	-11.1325	54.2901	23.4244	0	0	0	0	0	0	0	0	0	0	0	0	0	0	0	0	0	0
14	-188.744	25.3361	-27.8061	-46.1377	113.086	-174.024	25.6409	-133.256	52.0442	-95.7229	137.288	241.818	-191.334	197.284	-48.1279	-80.6561	11.0428	-11.6898	-68.0971	-8.61326	-23.1075	-17.2319	0	0	0	0	0	0	0	0	0	0	0	0	0	0	0	0	0	0
15	-40.9537	-121.816	-167.155	27.609	-179.608	-157.859	-8.01872	21.2839	135.353	-7.08883	81.5175	-23.0035	117.119	-48.1279	292.069	92.6711	5.01855	-86.5642	87.9622	102.069	-13.4376	58.463	0	0	0	0	0	0	0	0	0	0	0	0	0	0	0	0	0	0
16	406.645	-102.896	7.01889	7.81949	-97.3578	152.307	-94.7313	119.978	15.4028	-56.9287	30.3482	-92.6596	379.79	-80.6561	92.6711	344.463	77.849	128.513	40.0762	-108.783	42.2154	-18.8625	0	0	0	0	0	0	0	0	0	0	0	0	0	0	0	0	0	0
17	99.0751	-49.3063	-26.9732	20.9122	-32.6786	-42.3058	-114.718	-2.11637	-58.6625	-26.2613	9.93014	-10.8316	96.475	11.0428	5.01855	77.849	82.2768	12.4506	-21.1509	-104.8	35.004	-26.9572	0	0	0	0	0	0	0	0	0	0	0	0	0	0	0	0	0	0
18	285.027	144.529	351.142	-27.7401	42.7289	-76.7771	-39.8109	40.4553	-136.251	-160.625	-115.728	81.9474	202.342	-11.6898	-86.5642	128.513	12.4506	446.597	79.0267	45.2582	-64.5455	-65.3638	0	0	0	0	0	0	0	0	0	0	0	0	0	0	0	0	0	0
19	18.5604	16.6736	-21.8451	70.5214	-48.2885	-79.5892	11.9397	-35.0111	15.7495	-83.0274	52.7214	-57.7186	195.383	-68.0971	87.9622	40.0762	-21.1509	79.0267	151.045	150.613	-44.6042	44.2693	0	0	0	0	0	0	0	0	0	0	0	0	0	0	0	0	0	0
20	-213.838	-27.3544	59.4224	33.8057	-34.1409	-193.845	64.733	-81.057	130.315	-55.2002	27.3367	80.0639	-11.1325	-8.61326	102.069	-108.783	-104.8	45.2582	150.613	334.432	-114.216	90.4499	0	0	0	0	0	0	0	0	0	0	0	0	0	0	0	0	0	0
21	65.0674	-20.6297	-54.1728	40.4199	-13.3995	102.745	-16.2717	61.9517	-10.8111	41.1063	-2.79335	-48.3628	54.2901	-23.1075	-13.4376	42.2154	35.004	-64.5455	-44.6042	-114.216	55.1848	-16.6394	0	0	0	0	0	0	0	0	0	0	0	0	0	0	0	0	0	0
22	-76.283	-56.7879	-53.2907	34.9673	-32.9447	-18.0962	15.7306	-16.7553	75.7127	8.38876	38.2506	-8.7318	23.4244	-17.2319	58.463	-18.8625	-26.9572	-65.3638	44.2693	90.4499	-16.6394	44.55	0	0	0	0	0	0	0	0	0	0	0	0	0	0	0	0	0	0
23-dimensional	115.43	-10.9784	11.8534	5.0919	-9.49525	41.2445	-15.8385	24.2275	-10.531	14.836	-26.8592	-18.2203	49.849	-18.652	-3.94273	40.6089	10.1719	28.7278	1.802	-21.3602	6.35368	-7.545	-0.183549	0	0	0	0	0	0	0	0	0	0	0	0	0	0	0	0	0
2	-10.9784	72.9672	11.0504	23.1262	10.2391	-21.226	17.0122	-12.9042	-20.0163	-10.2723	-10.225	-1.10554	-18.5467	-6.32991	-18.2662	-8.0704	-15.4712	5.47811	3.82142	-3.67418	4.03848	-8.99914	7.31676	0	0	0	0	0	0	0	0	0	0	0	0	0	0	0	0	0
3	11.8534	11.0504	110.378	16.9894	17.2311	-12.134	-2.25011	15.6868	-23.0388	-8.80409	-35.4772	28.7072	-0.136361	-12.1906	-23.1752	3.05789	-13.8877	25.5861	0.10235	4.94562	1.06035	-8.85413	7.76788	0	0	0	0	0	0	0	0	0	0	0	0	0	0	0	0	0
4	5.0919	23.1262	16.9894	86.3721	-2.87267	-19.6651	7.60764	17.4312	7.39101	18.711	-7.40762	11.4758	29.8193	-3.94045	3.22312	0.61337	2.89194	-2.09224	6.8885	3.45188	3.57849	3.74896	-0.555818	0	0	0	0	0	0	0	0	0	0	0	0	0	0	0	0	0
5	-9.49525	10.2391	17.2311	-2.87267	30.9992	9.66045	14.0762	-2.7231	-5.38418	-11.0419	16.4677	21.8849	-11.4326	14.6056	-15.6976	-10.5612	0.652836	7.61116	-5.63008	-3.06491	-3.60947	-2.05942	-2.72157	0	0	0	0	0	0	0	0	0	0	0	0	0	0	0	0	0
6	41.2445	-21.226	-12.134	-19.6651	9.66045	91.6076	12.0582	30.2232	7.51024	21.3198	2.16127	-24.8963	24.66	-6.94017	-8.60376	12.6112	8.21117	2.91583	-10.5015	-18.2764	3.07252	2.10963	-8.63651	0	0	0	0	0	0	0	0	0	0	0	0	0	0	0	0	0
7	-15.8385	17.0122	-2.25011	7.60764	14.0762	12.0582	32.1472	6.87236	10.819	3.66207	12.0537	8.40497	-9.12591	5.95886	1.52857	-10.3231	-7.43474	-0.54372	0.36896	6.83285	-3.96406	2.84477	-2.80236	0	0	0	0	0	0	0	0	0	0	0	0	0	0	0	0	0
8	24.2275	-12.9042	15.6868	17.4312	-2.7231	30.2232	6.87236	47.1681	10.2638	16.6626	-6.55285	9.74114	27.4898	-4.96864	7.86527	9.90542	9.7265	12.5074	-5.53206	-7.22061	0.442419	1.45506	-6.89861	0	0	0	0	0	0	0	0	0	0	0	0	0	0	0	0	0
9	-10.531	-20.0163	-23.0388	7.39101	-5.38418	7.51024	10.819	10.2638	36.1699	6.52037	17.1899	16.2339	7.69673	10.4446	17.1325	0.228302	0.365329	-8.31926	0.301471	13.5865	-4.6883	9.53427	-4.32569	0	0	0	0	0	0	0	0	0	0	0	0	0	0	0	0	0
10	14.836	-10.2723	-8.80409	18.711	-11.0419	21.3198	3.66207	16.6626	6.52037	60.3766	-28.868	-27.8683	-12.8126	-1.50422	4.82967	-7.71288	6.96844	-7.89323	-10.2635	-4.66552	-1.44325	3.86124	-6.66012	0	0	0	0	0	0	0	0	0	0	0	0	0	0	0	0	0
11	-26.8592	-10.225	-35.4772	-7.40762	16.4677	2.16127	12.0537	-6.55285	17.1899	-28.868	56.3504	22.0205	13.1739	22.734	14.3337	0.780166	11.7021	-2.45453	3.08365	3.68742	-6.47833	7.1985	-7.43374	0	0	0	0	0	0	0	0	0	0	0	0	0	0	0	0	0
12	-18.2203	-1.10554	28.7072	11.4758	21.8849	-24.8963	8.40497	9.74114	16.2339	-27.8683	22.0205	77.8331	-4.45059	24.5411	-2.05365	-9.35593	-0.655807	8.55861	-5.8592	8.04445	-5.08366	-0.738559	-0.296652	0	0	0	0	0	0	0	0	0	0	0	0	0	0	0	0	0
13	49.849	-18.5467	-0.136361	29.8193	-11.4326	24.66	-9.12591	27.4898	7.69673	-12.8126	13.1739	-4.45059	88.2729	-13.2207	15.7708	36.4986	16.6789	26.221	18.1013	-0.487033	1.35886	4.55737	-4.88086	0	0	0	0	0	0	0	0	0	0	0	0	0	0	0	0	0
14	-18.652	-6.32991	-12.1906	-3.94045	14.6056	-6.94017	5.95886	-4.96864	10.4446	-1.50422	22.734	24.5411	-13.2207	29.2128	1.69803	-10.4402	12.3831	8.43441	-9.11465	0.143171	-8.83958	1.82973	-7.82928	0	0	0	0	0	0	0	0	0	0	0	0	0	0	0	0	0
15	-3.94273	-18.2662	-23.1752	3.22312	-15.6976	-8.60376	1.52857	7.86527	17.1325	4.82967	14.3337	-2.05365	15.7708	1.69803	33.6764	7.63699	8.24455	-2.0639	7.21393	10.8965	-5.82566	8.2853	-5.37463	0	0	0	0	0	0	0	0	0	0	0	0	0	0	0	0	0
16	40.6089	-8.0704	3.05789	0.61337	-10.5612	12.6112	-10.3231	9.90542	0.228302	-7.71288	0.780166	-9.35593	36.4986	-10.4402	7.63699	35.0408	4.96099	10.4469	4.58472	-11.1298	5.85617	-2.7758	1.96023	0	0	0	0	0	0	0	0	0	0	0	0	0	0	0	0	0
17	10.1719	-15.4712	-13.8877	2.89194	0.652836	8.21117	-7.43474	9.7265	0.365329	6.96844	11.7021	-0.655807	16.6789	12.3831	8.24455	4.96099	21.6405	12.6654	-4.85613	-9.28544	-4.2637	1.52943	-9.3106	0	0	0	0	0	0	0	0	0	0	0	0	0	0	0	0	0
18	28.7278	5.47811	25.5861	-2.09224	7.61116	2.91583	-0.54372	12.5074	-8.31926	-7.89323	-2.45453	8.55861	26.221	8.43441	-2.0639	10.4469	12.6654	54.3836	5.56881	5.54292	-13.0653	-2.93887	-7.92752	0	0	0	0	0	0	0	0	0	0	0	0	0	0	0	0	0
19	1.802	3.82142	0.10235	6.8885	-5.63008	-10.5015	0.36896	-5.53206	0.301471	-10.2635	3.08365	-5.8592	18.1013	-9.11465	7.21393	4.58472	-4.85613	5.56881	15.6647	14.8171	-2.87375	3.56348	1.90271	0	0	0	0	0	0	0	0	0	0	0	0	0	0	0	0	0
20	-21.3602	-3.67418	4.94562	3.45188	-3.06491	-18.2764	6.83285	-7.22061	13.5865	-4.66552	3.68742	8.04445	-0.487033	0.143171	10.8965	-11.1298	-9.28544	5.54292	14.8171	33.5496	-12.1131	9.42128	-0.829203	0	0	0	0	0	0	0	0	0	0	0	0	0	0	0	0	0
21	6.35368	4.03848	1.06035	3.57849	-3.60947	3.07252	-3.96406	0.442419	-4.6883	-1.44325	-6.47833	-5.08366	1.35886	-8.83958	-5.82566	5.85617	-4.2637	-13.0653	-2.87375	-12.1131	10.0128	-4.1097	5.3895	0	0	0	0	0	0	0	0	0	0	0	0	0	0	0	0	0
22	-7.545	-8.99914	-8.85413	3.74896	-2.05942	2.10963	2.84477	1.45506	9.53427	3.86124	7.1985	-0.738559	4.55737	1.82973	8.2853	-2.7758	1.52943	-2.93887	3.56348	9.42128	-4.1097	5.78595	-2.93291	0	0	0	0	0	0	0	0	0	0	0	0	0	0	0	0	0
23	-0.183549	7.31676	7.76788	-0.555818	-2.72157	-8.63651	-2.80236	-6.89861	-4.32569	-6.66012	-7.43374	-0.296652	-4.88086	-7.82928	-5.37463	1.96023	-9.3106	-7.92752	1.90271	-0.829203	5.3895	-2.93291	6.463	0	0	0	0	0	0	0	0	0	0	0	0	0	0	0	0	0
24-dimensional	155.175	0.00559846	2.916	0.0274455	0.594609	12.8737	0.0700393	5.70971	3.74406	3.2218	6.29566	0.112432	19.5011	5.70164	0.981507	9.18336	0.751766	24.6943	1.16347	2.15458	1.285	0.0804002	1.04093	0.648229	0.1	0	0	0	0	0	0	0	0	0	0	0	0	0	0	0
2	0.00559846	77.465	3.15138	2.09288	1.56961	7.90145	11.5189	1.77711	9.81679	0.394046	0.63303	7.06297	6.68044	1.6993	6.71816	4.53391	15.7202	10.4846	2.35614	0.240048	1.08811	0.186673	4.26162	1.06729	0	0	0	0	0	0	0	0	0	0	0	0	0	0	0	0
3	2.916	3.15138	128.512	1.72466	3.33089	2.31035	0.279736	2.40151	7.88403	0.493477	11.8796	16.8397	0.114758	2.3035	7.067	0.0801584	6.07918	14.1134	0.274247	0.768109	0.152693	0.0853674	1.87785	0.211713	0	0	0	0	0	0	0	0	0	0	0	0	0	0	0	0
4	0.0274455	2.09288	1.72466	83.4582	0.175574	2.46608	0.0455321	3.12468	1.93292	2.69352	0.759202	0.198446	11.5738	6.61331e-05	0.581778	0.676149	2.82436	3.08843	0.000645594	0.0219683	0.000100994	0.153381	0.676559	0.353472	0	0	0	0	0	0	0	0	0	0	0	0	0	0	0	0
5	0.594609	1.56961	3.33089	0.175574	9.82669	0.741863	2.77275	0.0777304	0.504922	1.0887	2.82671	6.81033	1.57334	1.8456	2.84326	1.5808	0.0915467	1.36987	0.150242	0.0309925	0.0695288	1.08184e-05	0.00481547	0.0247058	0	0	0	0	0	0	0	0	0	0	0	0	0	0	0	0
6	12.8737	7.90145	2.31035	2.46608	0.741863	89.788	0.186152	9.25281	1.60952	3.79948	0.0126207	14.1074	7.83968	0.149961	0.260374	3.48199	3.71394	0.88188	2.48861	4.92778	0.00021913	0.158698	2.17065	0.223357	0	0	0	0	0	0	0	0	0	0	0	0	0	0	0	0
7	0.0700393	11.5189	0.279736	0.0455321	2.77275	0.186152	26.2038	0.408625	0.036497	0.665244	2.13332	15.6387	3.00604	0.0251191	0.501394	6.34936	11.9947	8.83258	1.77897	2.71519	0.104172	3.17868	1.48593	1.35068	0	0	0	0	0	0	0	0	0	0	0	0	0	0	0	0
8	5.70971	1.77711	2.40151	3.12468	0.0777304	9.25281	0.408625	22.2597	1.12035	2.73881	0.43787	0.802136	7.67115	0.228339	0.653232	1.05686	1.08411	1.37934	0.343273	0.557072	0.000681979	0.0116073	0.529475	0.000858144	0	0	0	0	0	0	0	0	0	0	0	0	0	0	0	0
9	3.74406	9.81679	7.88403	1.93292	0.504922	1.60952	0.036497	1.12035	19.9624	0.12363	2.39749	0.210045	1.73878	2.39859	5.23849	1.03465	3.43992	8.15082	0.70022	0.509663	0.90169	0.0023257	2.05855	0.603568	0	0	0	0	0	0	0	0	0	0	0	0	0	0	0	0
10	3.2218	0.394046	0.493477	2.69352	1.0887	3.79948	0.665244	2.73881	0.12363	37.7454	7.98949	4.2102	2.17583	0.107887	0.0782747	1.25966	0.00301751	0.00563722	0.518792	0.0570837	0.000645352	0.547247	0.0974581	0.075233	0	0	0	0	0	0	0	0	0	0	0	0	0	0	0	0
11	6.29566	0.63303	11.8796	0.759202	2.82671	0.0126207	2.13332	0.43787	2.39749	7.98949	32.1404	6.86132	1.45763	4.71888	1.73706	0.0147243	0.649114	0.0256486	0.232497	0.248013	0.304094	0.84764	0.294242	0.0242619	0	0	0	0	0	0	0	0	0	0	0	0	0	0	0	0
12	0.112432	7.06297	16.8397	0.198446	6.81033	14.1074	15.6387	0.802136	0.210045	4.2102	6.86132	165.789	3.19695	1.48951	2.60276	11.3443	20.3715	33.6974	2.356	5.67263	0.445831	5.64798	5.86642	3.61216	0	0	0	0	0	0	0	0	0	0	0	0	0	0	0	0
13	19.5011	6.68044	0.114758	11.5738	1.57334	7.83968	3.00604	7.67115	1.73878	2.17583	1.45763	3.19695	84.2986	0.993506	3.79613	18.4156	8.07028	1.73449	1.56463	0.215892	0.0303635	0.0362708	1.28737	0.251193	0	0	0	0	0	0	0	0	0	0	0	0	0	0	0	0
14	5.70164	1.6993	2.3035	6.61331e-05	1.8456	0.149961	0.0251191	0.228339	2.39859	0.107887	4.71888	1.48951	0.993506	10.3693	0.260991	0.206796	5.36295	0.12635	2.03129	0.135258	1.36623	0.168616	1.89572	0.211974	0	0	0	0	0	0	0	0	0	0	0	0	0	0	0	0
15	0.981507	6.71816	7.067	0.581778	2.84326	0.260374	0.501394	0.653232	5.23849	0.0782747	1.73706	2.60276	3.79613	0.260991	14.1143	2.06273	4.21959	2.47956	0.0182368	0.427166	0.823945	0.0228217	1.47694	0.276097	0	0	0	0	0	0	0	0	0	0	0	0	0	0	0	0
16	9.18336	4.53391	0.0801584	0.676149	1.5808	3.48199	6.34936	1.05686	1.03465	1.25966	0.0147243	11.3443	18.4156	0.206796	2.06273	21.7717	6.86807	1.74058	0.307558	3.48341	0.00056883	2.09685	0.950785	0.824161	0	0	0	0	0	0	0	0	0	0	0	0	0	0	0	0
17	0.751766	15.7202	6.07918	2.82436	0.0915467	3.71394	11.9947	1.08411	3.43992	0.00301751	0.649114	20.3715	8.07028	5.36295	4.21959	6.86807	36.5891	9.33932	5.46615	5.31836	2.11284	3.94921	9.43981	2.75552	0	0	0	0	0	0	0	0	0	0	0	0	0	0	0	0
18	24.6943	10.4846	14.1134	3.08843	1.36987	0.88188	8.83258	1.37934	8.15082	0.00563722	0.0256486	33.6974	1.73449	0.12635	2.47956	1.74058	9.33932	105.021	6.85375	4.35612	0.0267639	4.35754	2.52778	3.41147	0	0	0	0	0	0	0	0	0	0	0	0	0	0	0	0
19	1.16347	2.35614	0.274247	0.000645594	0.150242	2.48861	1.77897	0.343273	0.70022	0.518792	0.232497	2.356	1.56463	2.03129	0.0182368	0.307558	5.46615	6.85375	6.00109	4.57356	0.0409697	1.89569	1.46729	0.626485	0	0	0	0	0	0	0	0	0	0	0	0	0	0	0	0
20	2.15458	0.240048	0.768109	0.0219683	0.0309925	4.92778	2.71519	0.557072	0.509663	0.0570837	0.248013	5.67263	0.215892	0.135258	0.427166	3.48341	5.31836	4.35612	4.57356	14.7723	0.717501	2.89365	0.457565	0.346507	0	0	0	0	0	0	0	0	0	0	0	0	0	0	0	0
21	1.285	1.08811	0.152693	0.000100994	0.0695288	0.00021913	0.104172	0.000681979	0.90169	0.000645352	0.304094	0.445831	0.0303635	1.36623	0.823945	0.00056883	2.11284	0.0267639	0.0409697	0.717501	1.62022	0.0240012	1.22136	0.192646	0	0	0	0	0	0	0	0	0	0	0	0	0	0	0	0
22	0.0804002	0.186673	0.0853674	0.153381	1.08184e-05	0.158698	3.17868	0.0116073	0.0023257	0.547247	0.84764	5.64798	0.0362708	0.168616	0.0228217	2.09685	3.94921	4.35754	1.89569	2.89365	0.0240012	3.08937	0.785731	0.836311	0	0	0	0	0	0	0	0	0	0	0	0	0	0	0	0
23	1.04093	4.26162	1.87785	0.676559	0.00481547	2.17065	1.48593	0.529475	2.05855	0.0974581	0.294242	5.86642	1.28737	1.89572	1.47694	0.950785	9.43981	2.52778	1.46729	0.457565	1.22136	0.785731	3.33664	0.83722	0	0	0	0	0	0	0	0	0	0	0	0	0	0	0	0
24	0.648229	1.06729	0.211713	0.353472	0.0247058	0.223357	1.35068	0.000858144	0.603568	0.075233	0.0242619	3.61216	0.251193	0.211974	0.276097	0.824161	2.75552	3.41147	0.626485	0.346507	0.192646	0.836311	0.83722	0.503106	0	0	0	0	0	0	0	0	0	0	0	0	0	0	0	0
25-dimensional	26.8588	-1.13614	4.14527	-2.3533	0.0019294	6.04661	0.44074	6.09186	-3.51801	2.07605	-3.84929	0.471881	5.6882	-5.81659	-1.54215	5.40892	1.7193	10.0459	3.42217	-2.13869	-1.28388	0.172196	1.08384	-3.03756	1.71324	2	0	0	0	0	0	0	0	0	0	0	0	0	0	0
2	-1.13614	18.4529	3.0678	4.23011	1.48482	-4.87526	6.14658	-3.53412	-6.499	-0.254648	-2.36407	5.44664	-3.09089	-1.91895	-5.4743	-3.82762	-10.2128	6.40508	2.23371	0.452984	4.43391	1.12519	4.76121	-1.12258	-1.13265	0	0	0	0	0	0	0	0	0	0	0	0	0	0	0
3	4.14527	3.0678	22.9466	1.86757	4.22975	-3.46388	1.42191	3.59215	-5.48362	-1.97318	-6.45459	8.13265	-1.85755	-3.42619	-5.15188	-0.810933	-3.63496	7.55381	1.52215	2.05199	-0.551373	-0.732582	2.3816	-1.45599	0.64307	0	0	0	0	0	0	0	0	0	0	0	0	0	0	0
4	-2.3533	4.23011	1.86757	20.3732	-2.44339	-1.96661	-1.43526	2.17045	2.41474	4.85622	-2.95793	-0.684331	10.0725	1.06597	1.0688	2.3223	-0.229111	-3.62629	-1.26421	-1.12503	3.67171	-0.37272	-0.650466	2.67295	-1.78116	0	0	0	0	0	0	0	0	0	0	0	0	0	0	0
5	0.0019294	1.48482	4.22975	-2.44339	7.4955	0.825958	4.10048	0.48475	-1.14176	-3.28873	4.29066	5.06153	-5.0047	1.89057	-3.02363	-3.03217	2.13671	2.42598	0.229046	0.280691	-3.34674	-0.320114	-0.898346	-1.44758	1.36024	0	0	0	0	0	0	0	0	0	0	0	0	0	0	0
6	6.04661	-4.87526	-3.46388	-1.96661	0.825958	19.6071	0.299615	5.32132	2.33299	4.77752	-0.454112	-7.39655	7.42546	-0.170017	-1.27562	4.11057	1.84897	-1.94045	-3.88957	-4.90253	2.09166	-0.567422	-2.39109	1.77403	-0.994865	0	0	0	0	0	0	0	0	0	0	0	0	0	0	0
7	0.44074	6.14658	1.42191	-1.43526	4.10048	0.299615	10.7218	1.93329	-0.206568	0.876205	3.50421	7.81004	-5.03561	-0.83618	-1.19709	-5.36473	-5.20425	5.99742	3.29845	3.69309	-1.12563	3.36881	1.96082	-3.03627	0.854509	0	0	0	0	0	0	0	0	0	0	0	0	0	0	0
8	6.09186	-3.53412	3.59215	2.17045	0.48475	5.32132	1.93329	10.3223	2.35448	2.28798	-0.534355	1.65709	3.41719	-1.65839	1.91298	1.61602	4.41357	2.42131	-0.317946	-0.954741	-2.34485	-0.0510986	-2.10109	-0.904892	1.1565	0	0	0	0	0	0	0	0	0	0	0	0	0	0	0
9	-3.51801	-6.499	-5.48362	2.41474	-1.14176	2.33299	-0.206568	2.35448	8.99952	0.429315	3.30827	-0.952573	2.06842	2.90913	4.65703	1.91641	4.33425	-5.69052	-1.44472	1.57202	-2.54166	-0.167904	-3.04263	1.29554	0.30999	0	0	0	0	0	0	0	0	0	0	0	0	0	0	0
10	2.07605	-0.254648	-1.97318	4.85622	-3.28873	4.77752	0.876205	2.28798	0.429315	13.4658	-6.563	-3.94907	-0.503113	0.15333	0.217635	-1.73729	-2.57813	-0.233642	-2.42509	-1.0982	2.81481	1.7869	0.120277	0.56239	-1.33353	0	0	0	0	0	0	0	0	0	0	0	0	0	0	0
11	-3.84929	-2.36407	-6.45459	-2.95793	4.29066	-0.454112	3.50421	-0.534355	3.30827	-6.563	12.0411	5.11938	0.5251	3.71893	2.89998	-0.634498	3.68697	0.384765	1.72461	1.47505	-3.23721	1.604	-1.65988	-1.16939	1.02973	0	0	0	0	0	0	0	0	0	0	0	0	0	0	0
12	0.471881	5.44664	8.13265	-0.684331	5.06153	-7.39655	7.81004	1.65709	-0.952573	-3.94907	5.11938	25.7721	-3.25475	2.54728	-3.2715	-6.66965	-9.37985	11.5989	2.9406	4.68201	1.69827	4.79345	4.9419	-3.65529	-0.175067	0	0	0	0	0	0	0	0	0	0	0	0	0	0	0
13	5.6882	-3.09089	-1.85755	10.0725	-5.0047	7.42546	-5.03561	3.41719	2.06842	-0.503113	0.5251	-3.25475	23.4447	-0.310819	3.18666	9.63642	0.0994052	2.46064	0.457072	-2.2176	5.3916	0.257445	-0.722822	3.30955	-2.76938	0	0	0	0	0	0	0	0	0	0	0	0	0	0	0
14	-5.81659	-1.91895	-3.42619	1.06597	1.89057	-0.170017	-0.83618	-1.65839	2.90913	0.15333	3.71893	2.54728	-0.310819	6.99743	0.786629	-0.560582	2.78323	-0.768318	-3.52748	-1.16213	-0.437071	-0.609892	-2.24166	1.68476	-0.91699	0	0	0	0	0	0	0	0	0	0	0	0	0	0	0
15	-1.54215	-5.4743	-5.15188	1.0688	-3.02363	-1.27562	-1.19709	1.91298	4.65703	0.217635	2.89998	-3.2715	3.18666	0.786629	7.61301	2.72521	4.88832	-3.1251	0.555779	1.48717	-2.61748	0.212943	-2.64666	0.728523	0.386959	0	0	0	0	0	0	0	0	0	0	0	0	0	0	0
16	5.40892	-3.82762	-0.810933	2.3223	-3.03217	4.11057	-5.36473	1.61602	1.91641	-1.73729	-0.634498	-6.66965	9.63642	-0.560582	2.72521	9.55054	4.08389	-2.67457	-1.53313	-3.99992	1.23795	-2.76373	-1.6295	2.29407	-0.574251	0	0	0	0	0	0	0	0	0	0	0	0	0	0	0
17	1.7193	-10.2128	-3.63496	-0.229111	2.13671	1.84897	-5.20425	4.41357	4.33425	-2.57813	3.68697	-9.37985	0.0994052	2.78323	4.88832	4.08389	18.2297	-5.92162	-2.42998	-3.19713	-9.21247	-4.67573	-7.84356	0.785581	3.04209	0	0	0	0	0	0	0	0	0	0	0	0	0	0	0
18	10.0459	6.40508	7.55381	-3.62629	2.42598	-1.94045	5.99742	2.42131	-5.69052	-0.233642	0.384765	11.5989	2.46064	-0.768318	-3.1251	-2.67457	-5.92162	20.5019	5.30569	4.21821	-0.523014	4.15317	3.12705	-3.77274	0.0944759	0	0	0	0	0	0	0	0	0	0	0	0	0	0	0
19	3.42217	2.23371	1.52215	-1.26421	0.229046	-3.88957	3.29845	-0.317946	-1.44472	-2.42509	1.72461	2.9406	0.457072	-3.52748	0.555779	-1.53313	-2.42998	5.30569	5.72207	4.79552	-1.90467	2.49685	1.80044	-2.51129	1.11424	0	0	0	0	0	0	0	0	0	0	0	0	0	0	0
20	-2.13869	0.452984	2.05199	-1.12503	0.280691	-4.90253	3.69309	-0.954741	1.57202	-1.0982	1.47505	4.68201	-2.2176	-1.16213	1.48717	-3.99992	-3.19713	4.21821	4.79552	8.01356	-3.14931	3.24031	0.96083	-1.7622	0.70208	0	0	0	0	0	0	0	0	0	0	0	0	0	0	0
21	-1.28388	4.43391	-0.551373	3.67171	-3.34674	2.09166	-1.12563	-2.34485	-2.54166	2.81481	-3.23721	1.69827	5.3916	-0.437071	-2.61748	1.23795	-9.21247	-0.523014	-1.90467	-3.14931	9.02941	1.03088	3.95704	1.72821	-3.12812	0	0	0	0	0	0	0	0	0	0	0	0	0	0	0
22	0.172196	1.12519	-0.732582	-0.37272	-0.320114	-0.567422	3.36881	-0.0510986	-0.167904	1.7869	1.604	4.79345	0.257445	-0.609892	0.212943	-2.76373	-4.67573	4.15317	2.49685	3.24031	1.03088	3.59551	1.96708	-1.53919	-0.347871	0	0	0	0	0	0	0	0	0	0	0	0	0	0	0
23	1.08384	4.76121	2.3816	-0.650466	-0.898346	-2.39109	1.96082	-2.10109	-3.04263	0.120277	-1.65988	4.9419	-0.722822	-2.24166	-2.64666	-1.6295	-7.84356	3.12705	1.80044	0.96083	3.95704	1.96708	4.12388	-1.12791	-0.842737	0	0	0	0	0	0	0	0	0	0	0	0	0	0	0
24	-3.03756	-1.12258	-1.45599	2.67295	-1.44758	1.77403	-3.03627	-0.904892	1.29554	0.56239	-1.16939	-3.65529	3.30955	1.68476	0.728523	2.29407	0.785581	-3.77274	-2.51129	-1.7622	1.72821	-1.53919	-1.12791	2.46607	-1.25731	0	0	0	0	0	0	0	0	0	0	0	0	0	0	0
25	1.71324	-1.13265	0.64307	-1.78116	1.36024	-0.994865	0.854509	1.1565	0.30999	-1.33353	1.02973	-0.175067	-2.76938	-0.91699	0.386959	-0.574251	3.04209	0.0944759	1.11424	0.70208	-3.12812	-0.347871	-0.842737	-1.25731	1.5092	0	0	0	0	0	0	0	0	0	0	0	0	0	0	0
26-dimensional	188.587	0.523034	4.94444	0.581192	0.0246129	8.86467	0.505093	8.30555	2.7706	0.316518	2.53023	0.167462	7.79085	8.76723	0.913076	6.52548	1.27389	21.3255	1.22581	0.769129	1.05505	0.186768	0.616387	1.86425	0.513371	0.0837123	10	0	0	0	0	0	0	0	0	0	0	0	0	0
2	0.523034	86.5979	2.12191	3.62198	0.439116	5.82801	7.96645	2.83309	10.8757	0.0134224	1.83024	6.94158	2.30551	0.869629	6.98433	3.37496	27.4997	11.626	2.03278	0.0164115	5.82734	0.148674	5.09053	0.409284	0.244684	0.0219014	0	0	0	0	0	0	0	0	0	0	0	0	0	0
3	4.94444	2.12191	133.367	1.29961	4.80699	3.07936	0.912061	2.93932	7.2618	1.49631	9.37007	17.2439	0.91222	3.02518	7.11697	0.230506	2.83442	12.7828	0.212032	1.2583	0.218491	0.0376486	1.72094	0.42463	0.0633971	0.0207408	0	0	0	0	0	0	0	0	0	0	0	0	0	0
4	0.581192	3.62198	1.29961	115.616	1.01751	1.09425	0.00229205	0.741707	1.78608	3.16381	1.04608	0.0111255	24.6412	0.212573	0.0797593	0.914536	0.0639613	5.59962	2.1229	0.0898695	1.71526	0.0819929	4.8112e-05	2.39016	1.17067	0.156187	0	0	0	0	0	0	0	0	0	0	0	0	0	0
5	0.0246129	0.439116	4.80699	1.01751	14.6528	0.151601	5.30061	0.0249865	0.272802	3.56745	5.36857	6.86358	6.39857	0.843123	2.58132	2.53821	1.456	1.0096	0.0383903	0.0572288	3.50213	0.000318501	0.10508	0.415934	0.369771	0.0221225	0	0	0	0	0	0	0	0	0	0	0	0	0	0
6	8.86467	5.82801	3.07936	1.09425	0.151601	96.2463	0.0057049	7.21192	1.32752	6.05542	0.0770882	13.8721	13.8439	0.00593388	0.371936	4.31808	0.780982	0.826049	3.43473	6.1524	1.21922	0.112986	1.51877	0.746115	0.226772	0.00192096	0	0	0	0	0	0	0	0	0	0	0	0	0	0
7	0.505093	7.96645	0.912061	0.00229205	5.30061	0.0057049	37.8662	0.492143	0.00244818	0.109219	5.25333	17.5154	6.77721	0.253228	0.804202	8.55441	4.69686	5.49421	0.452816	4.65478	1.40555	5.03493	1.88662	1.61325	0.0402923	0.218778	0	0	0	0	0	0	0	0	0	0	0	0	0	0
8	8.30555	2.83309	2.93932	0.741707	0.0249865	7.21192	0.492143	27.5604	1.26821	1.96294	0.200482	0.540009	3.01784	0.641156	1.11563	0.790486	4.24908	2.04385	0.0280754	0.337991	0.929574	0.0452257	1.39719	0.286641	0.427732	0.0244725	0	0	0	0	0	0	0	0	0	0	0	0	0	0
9	2.7706	10.8757	7.2618	1.78608	0.272802	1.32752	0.00244818	1.26821	20.5137	0.00442717	3.09122	0.178338	1.03578	2.0683	5.15763	0.830803	5.06673	8.82947	0.829031	0.715609	1.93445	0.000569612	2.08961	0.483808	0.0123964	0.00812551	0	0	0	0	0	0	0	0	0	0	0	0	0	0
10	0.316518	0.0134224	1.49631	3.16381	3.56745	6.05542	0.109219	1.96294	0.00442717	55.9222	14.4781	5.04518	0.0284437	0.0253467	0.158391	0.401427	2.92667	0.268346	0.0707055	0.723526	4.04504	0.123195	0.103072	0.00165952	0.199919	0.205683	0	0	0	0	0	0	0	0	0	0	0	0	0	0
11	2.53023	1.83024	9.37007	1.04608	5.36857	0.0770882	5.25333	0.200482	3.09122	14.4781	40.8102	7.56519	0.0417435	3.24534	1.55465	0.232683	4.57835	0.0643006	0.0389341	0.901208	4.17292	1.39963	0.316033	0.172873	0.130012	0.101498	0	0	0	0	0	0	0	0	0	0	0	0	0	0
12	0.167462	6.94158	17.2439	0.0111255	6.86358	13.8721	17.5154	0.540009	0.178338	5.04518	7.56519	168.611	2.74762	1.54643	3.03158	11.6998	20.5774	31.0035	1.26625	6.00689	0.395718	6.7311	6.81147	3.02762	0.0280853	0.0273229	0	0	0	0	0	0	0	0	0	0	0	0	0	0
13	7.79085	2.30551	0.91222	24.6412	6.39857	13.8439	6.77721	3.01784	1.03578	0.0284437	0.0417435	2.74762	137.629	0.0213824	2.64225	23.4678	7.79294e-06	1.69246	0.111453	1.30494	7.63401	0.00467526	0.163068	2.65047	1.8503	0.00254549	0	0	0	0	0	0	0	0	0	0	0	0	0	0
14	8.76723	0.869629	3.02518	0.212573	0.843123	0.00593388	0.253228	0.641156	2.0683	0.0253467	3.24534	1.54643	0.0213824	12.3051	0.180916	0.0646459	1.80878	0.0984983	2.75192	0.377562	0.0229997	0.133246	1.35268	0.665441	0.188502	0.00252325	0	0	0	0	0	0	0	0	0	0	0	0	0	0
15	0.913076	6.98433	7.11697	0.0797593	2.58132	0.371936	0.804202	1.11563	5.15763	0.158391	1.55465	3.03158	2.64225	0.180916	15.3563	2.11357	5.20085	1.73242	0.416293	0.392622	1.15443	0.0108192	2.16455	0.0734185	0.0776767	0.0309681	0	0	0	0	0	0	0	0	0	0	0	0	0	0
16	6.52548	3.37496	0.230506	0.914536	2.53821	4.31808	8.55441	0.790486	0.830803	0.401427	0.232683	11.6998	23.4678	0.0646459	2.11357	23.5168	3.64403	1.29286	0.219	4.38927	0.655181	2.41171	0.874198	1.14745	0.0474568	0.0204635	0	0	0	0	0	0	0	0	0	0	0	0	0	0
17	1.27389	27.4997	2.83442	0.0639613	1.456	0.780982	4.69686	4.24908	5.06673	2.92667	4.57835	20.5774	7.79294e-06	1.80878	5.20085	3.64403	87.4875	11.0226	3.06475	2.03908	24.4818	4.12462	13.7351	0.279685	1.95095	0.0658563	0	0	0	0	0	0	0	0	0	0	0	0	0	0
18	21.3255	11.626	12.7828	5.59962	1.0096	0.826049	5.49421	2.04385	8.82947	0.268346	0.0643006	31.0035	1.69246	0.0984983	1.73242	1.29286	11.0226	116.462	11.9665	3.43089	0.0639446	2.60654	1.53463	4.37316	0.0549175	0.149262	0	0	0	0	0	0	0	0	0	0	0	0	0	0
19	1.22581	2.03278	0.212032	2.1229	0.0383903	3.43473	0.452816	0.0280754	0.829031	0.0707055	0.0389341	1.26625	0.111453	2.75192	0.416293	0.219	3.06475	11.9665	16.5122	4.05931	0.0343445	0.312879	0.173066	2.43701	0.699103	0.331885	0	0	0	0	0	0	0	0	0	0	0	0	0	0
20	0.769129	0.0164115	1.2583	0.0898695	0.0572288	6.1524	4.65478	0.337991	0.715609	0.723526	0.901208	6.00689	1.30494	0.377562	0.392622	4.38927	2.03908	3.43089	4.05931	17.0467	3.30857	3.38421	0.40276	0.614367	0.0687374	0.0336667	0	0	0	0	0	0	0	0	0	0	0	0	0	0
21	1.05505	5.82734	0.218491	1.71526	3.50213	1.21922	1.40555	0.929574	1.93445	4.04504	4.17292	0.395718	7.63401	0.0229997	1.15443	0.655181	24.4818	0.0639446	0.0343445	3.30857	25.0395	0.0057627	2.78778	0.447926	1.92126	0.135032	0	0	0	0	0	0	0	0	0	0	0	0	0	0
22	0.186768	0.148674	0.0376486	0.0819929	0.000318501	0.112986	5.03493	0.0452257	0.000569612	0.123195	1.39963	6.7311	0.00467526	0.133246	0.0108192	2.41171	4.12462	2.60654	0.312879	3.38421	0.0057627	4.80756	1.59014	0.353506	0.111432	0.108982	0	0	0	0	0	0	0	0	0	0	0	0	0	0
23	0.616387	5.09053	1.72094	4.8112e-05	0.10508	1.51877	1.88662	1.39719	2.08961	0.103072	0.316033	6.81147	0.163068	1.35268	2.16455	0.874198	13.7351	1.53463	0.173066	0.40276	2.78778	1.59014	5.09367	0.194446	0.284852	0.0538138	0	0	0	0	0	0	0	0	0	0	0	0	0	0
24	1.86425	0.409284	0.42463	2.39016	0.415934	0.746115	1.61325	0.286641	0.483808	0.00165952	0.172873	3.02762	2.65047	0.665441	0.0734185	1.14745	0.279685	4.37316	2.43701	0.614367	0.447926	0.353506	0.194446	1.71773	0.489339	0.021414	0	0	0	0	0	0	0	0	0	0	0	0	0	0
25	0.513371	0.244684	0.0633971	1.17067	0.369771	0.226772	0.0402923	0.427732	0.0123964	0.199919	0.130012	0.0280853	1.8503	0.188502	0.0776767	0.0474568	1.95095	0.0549175	0.699103	0.0687374	1.92126	0.111432	0.284852	0.489339	0.67131	0.0178668	0	0	0	0	0	0	0	0	0	0	0	0	0	0
26	0.0837123	0.0219014	0.0207408	0.156187	0.0221225	0.00192096	0.218778	0.0244725	0.00812551	0.205683	0.101498	0.0273229	0.00254549	0.00252325	0.0309681	0.0204635	0.0658563	0.149262	0.331885	0.0336667	0.135032	0.108982	0.0538138	0.021414	0.0178668	0.076176	0	0	0	0	0	0	0	0	0	0	0	0	0	0
27-dimensional	193.895	0.473784	6.20328	1.13123	0.0611699	8.58982	1.50647	9.10177	4.59346	0.714356	3.06525	0.181213	9.58489	6.48752	1.70851	5.22806	2.39813	20.8514	1.58583	1.01957	0.553131	0.417353	0.0499777	1.29489	0.203486	0.697139	0.13046	0	0	0	0	0	0	0	0	0	0	0	0	0
2	0.473784	86.716	2.26569	3.41654	0.347132	5.86892	8.50548	2.75109	11.4573	0.0279648	1.90984	6.95736	2.14035	0.734964	7.3262	3.55634	26.7049	11.5621	2.1124	0.0108114	6.07875	0.180166	4.64032	0.358092	0.294742	0.00238209	0.00431111	0	0	0	0	0	0	0	0	0	0	0	0	0
3	6.20328	2.26569	142.085	0.519721	2.65734	3.3107	2.80177	3.61847	11.2949	0.68903	10.7834	17.4347	0.282111	1.3537	9.96571	0.727553	1.2086	12.2745	0.451749	0.878098	0.0053461	0.0107121	0.281544	0.112366	0.0137947	0.815584	0.252508	0	0	0	0	0	0	0	0	0	0	0	0	0
4	1.13123	3.41654	0.519721	126.007	0.140127	0.946827	0.737508	0.4217	4.3588	1.78274	0.595191	0.0172467	20.1217	0.0355397	0.695808	1.89594	0.164947	5.2228	2.87568	0.00836453	0.747975	0.00243044	0.788986	1.41385	0.442811	0.212622	0.321341	0	0	0	0	0	0	0	0	0	0	0	0	0
5	0.0611699	0.347132	2.65734	0.140127	21.8944	0.237492	1.47426	0.0159225	0.236064	6.16977	7.04485	6.68305	10.0572	0.00217025	0.750486	1.05837	0.103886	1.23985	0.266587	0.269117	6.09241	0.187087	0.736895	1.26318	1.36192	1.00061	0.578592	0	0	0	0	0	0	0	0	0	0	0	0	0
6	8.58982	5.86892	3.3107	0.946827	0.237492	96.4677	0.00247037	7.03728	1.60837	5.72301	0.0570439	13.9018	13.2997	0.031453	0.275265	4.59227	0.611448	0.803465	3.57277	5.99383	1.07224	0.150521	1.20183	0.653918	0.169643	0.0310023	0.00766419	0	0	0	0	0	0	0	0	0	0	0	0	0
7	1.50647	8.50548	2.80177	0.737508	1.47426	0.00247037	56.9187	1.13397	1.53567	0.185118	3.46328	17.8885	3.17898	0.373264	3.3971	13.2951	1.07499	4.86216	1.1717	3.24061	0.17858	7.94997	0.0190745	0.4328	0.263913	3.75007	0.945388	0	0	0	0	0	0	0	0	0	0	0	0	0
8	9.10177	2.75109	3.61847	0.4217	0.0159225	7.03728	1.13397	28.566	0.623296	2.5593	0.313995	0.557167	3.80833	0.259752	0.654502	0.490871	5.55373	1.94139	0.0753743	0.455242	0.584961	0.00387726	2.48671	0.140957	0.218435	0.0516478	0.064518	0	0	0	0	0	0	0	0	0	0	0	0	0
9	4.59346	11.4573	11.2949	4.3588	0.236064	1.60837	1.53567	0.623296	32.7553	0.407436	4.65499	0.214721	0.0663921	0.164711	9.90904	2.49619	1.44861	8.08098	1.664	1.38535	4.4006	0.259632	0.00202145	0.0164564	0.597996	1.61473	0.811575	0	0	0	0	0	0	0	0	0	0	0	0	0
10	0.714356	0.0279648	0.68903	1.78274	6.16977	5.72301	0.185118	2.5593	0.407436	62.3183	16.3277	4.93683	0.078414	0.590735	0.0143076	1.05715	1.19352	0.195388	0.00175663	1.0942	5.89775	0.443381	1.31752	0.141083	0.702056	0.122367	0.282808	0	0	0	0	0	0	0	0	0	0	0	0	0
11	3.06525	1.90984	10.7834	0.595191	7.04485	0.0570439	3.46328	0.313995	4.65499	16.3277	42.5346	7.4898	0.0024904	2.12055	2.37198	0.0669774	3.20197	0.0443179	0.00495687	1.12371	5.1948	1.00933	0.0087835	0.36665	0.338695	0.0186524	0.0907883	0	0	0	0	0	0	0	0	0	0	0	0	0
12	0.181213	6.95736	17.4347	0.0172467	6.68305	13.9018	17.8885	0.557167	0.214721	4.93683	7.4898	168.648	2.66161	1.63603	3.13754	11.8577	20.2518	30.9542	1.2958	5.95119	0.426909	6.82666	6.56227	2.96008	0.0362374	0.0449934	0.000960648	0	0	0	0	0	0	0	0	0	0	0	0	0
13	9.58489	2.14035	0.282111	20.1217	10.0572	13.2997	3.17898	3.80833	0.0663921	0.078414	0.0024904	2.66161	149.216	0.261023	1.13924	19.5262	0.44823	1.48595	0.331072	1.83085	10.3232	0.166401	1.67801	3.95667	3.17423	0.665563	0.32886	0	0	0	0	0	0	0	0	0	0	0	0	0
14	6.48752	0.734964	1.3537	0.0355397	0.00217025	0.031453	0.373264	0.259752	0.164711	0.590735	2.12055	1.63603	0.261023	19.3632	0.110709	0.692517	5.0644	0.180748	1.77111	0.811251	0.21116	0.00924279	5.63566	1.70616	1.013	1.26861	0.606636	0	0	0	0	0	0	0	0	0	0	0	0	0
15	1.70851	7.3262	9.96571	0.695808	0.750486	0.275265	3.3971	0.654502	9.90904	0.0143076	2.37198	3.13754	1.13924	0.110709	20.8173	3.78179	2.28438	1.4925	0.134368	0.756406	2.53944	0.245739	0.196006	0.0212054	0.58494	1.38137	0.437651	0	0	0	0	0	0	0	0	0	0	0	0	0
16	5.22806	3.55634	0.727553	1.89594	1.05837	4.59227	13.2951	0.490871	2.49619	1.05715	0.0669774	11.8577	19.5262	0.692517	3.78179	27.2863	1.74925	1.13417	0.462945	3.64701	0.17113	3.42838	0.0227684	0.567929	0.0233299	0.818849	0.254356	0	0	0	0	0	0	0	0	0	0	0	0	0
17	2.39813	26.7049	1.2086	0.164947	0.103886	0.611448	1.07499	5.55373	1.44861	1.19352	3.20197	20.2518	0.44823	5.0644	2.28438	1.74925	105.518	11.7852	2.01016	2.95279	18.73	2.44305	24.3507	1.05361	0.666037	2.10346	0.624446	0	0	0	0	0	0	0	0	0	0	0	0	0
18	20.8514	11.5621	12.2745	5.2228	1.23985	0.803465	4.86216	1.94139	8.08098	0.195388	0.0443179	30.9542	1.48595	0.180748	1.4925	1.13417	11.7852	116.762	11.6851	3.56439	0.0312071	2.42415	1.93156	4.63271	0.0934618	0.284162	0.00943407	0	0	0	0	0	0	0	0	0	0	0	0	0
19	1.58583	2.1124	0.451749	2.87568	0.266587	3.57277	1.1717	0.0753743	1.664	0.00175663	0.00495687	1.2958	0.331072	1.77111	0.134368	0.462945	2.01016	11.6851	17.5067	3.64642	0.00154676	0.531249	0.000845808	1.90665	0.391573	0.0206283	0.0819618	0	0	0	0	0	0	0	0	0	0	0	0	0
20	1.01957	0.0108114	0.878098	0.00836453	0.269117	5.99383	3.24061	0.455242	1.38535	1.0942	1.12371	5.95119	1.83085	0.811251	0.756406	3.64701	2.95279	3.56439	3.64642	17.8131	4.06005	2.86193	1.04649	0.885685	0.19867	0.0375769	0.0623949	0	0	0	0	0	0	0	0	0	0	0	0	0
21	0.553131	6.07875	0.0053461	0.747975	6.09241	1.07224	0.17858	0.584961	4.4006	5.89775	5.1948	0.426909	10.3232	0.21116	2.53944	0.17113	18.73	0.0312071	0.00154676	4.06005	29.4033	0.153441	0.706355	1.01029	3.16132	0.192044	0.284474	0	0	0	0	0	0	0	0	0	0	0	0	0
22	0.417353	0.180166	0.0107121	0.00243044	0.187087	0.150521	7.94997	0.00387726	0.259632	0.443381	1.00933	6.82666	0.166401	0.00924279	0.245739	3.42838	2.44305	2.42415	0.531249	2.86193	0.153441	5.9093	0.403631	0.116377	0.396314	0.879966	0.161966	0	0	0	0	0	0	0	0	0	0	0	0	0
23	0.0499777	4.64032	0.281544	0.788986	0.736895	1.20183	0.0190745	2.48671	0.00202145	1.31752	0.0087835	6.56227	1.67801	5.63566	0.196006	0.0227684	24.3507	1.93156	0.000845808	1.04649	0.706355	0.403631	15.2085	1.22408	0.0589369	1.86136	1.11668	0	0	0	0	0	0	0	0	0	0	0	0	0
24	1.29489	0.358092	0.112366	1.41385	1.26318	0.653918	0.4328	0.140957	0.0164564	0.141083	0.36665	2.96008	3.95667	1.70616	0.0212054	0.567929	1.05361	4.63271	1.90665	0.885685	1.01029	0.116377	1.22408	2.49683	1.02825	0.628663	0.18319	0	0	0	0	0	0	0	0	0	0	0	0	0
25	0.203486	0.294742	0.0137947	0.442811	1.36192	0.169643	0.263913	0.218435	0.597996	0.702056	0.338695	0.0362374	3.17423	1.013	0.58494	0.0233299	0.666037	0.0934618	0.391573	0.19867	3.16132	0.396314	0.0589369	1.02825	1.40737	0.788768	0.249444	0	0	0	0	0	0	0	0	0	0	0	0	0
26	0.697139	0.00238209	0.815584	0.212622	1.00061	0.0310023	3.75007	0.0516478	1.61473	0.122367	0.0186524	0.0449934	0.665563	1.26861	1.38137	0.818849	2.10346	0.284162	0.0206283	0.0375769	0.192044	0.879966	1.86136	0.628663	0.788768	3.33799	1.05423	0	0	0	0	0	0	0	0	0	0	0	0	0
27	0.13046	0.00431111	0.252508	0.321341	0.578592	0.00766419	0.945388	0.064518	0.811575	0.282808	0.0907883	0.000960648	0.32886	0.606636	0.437651	0.254356	0.624446	0.00943407	0.0819618	0.0623949	0.284474	0.161966	1.11668	0.18319	0.249444	1.05423	0.461992	0	0	0	0	0	0	0	0	0	0	0	0	0
28-dimensional	195.069	0.677816	5.94645	1.12947	0.183821	10.9137	1.88884	8.86627	5.75835	0.905946	3.00836	0.238118	9.59682	6.59462	1.76589	5.00038	2.9157	20.4638	1.68042	0.862378	0.416516	0.102999	0.0542009	1.11571	0.156134	0.736383	0.00587709	0.0275701	0	0	0	0	0	0	0	0	0	0	0	0
2	0.677816	94.9645	2.7966	3.40671	1.37109	13.0891	5.97873	2.34906	6.5669	0.0305058	2.05724	5.94365	2.15846	0.62435	6.95319	2.97351	32.2328	12.5107	1.7815	0.024358	4.62311	2.15192	13.0869	0.740058	0.132107	0.0151626	0.95661	0.283502	0	0	0	0	0	0	0	0	0	0	0	0
3	5.94645	2.7966	143.627	0.51824	3.43993	5.20272	2.22584	3.80585	9.26213	0.92555	10.9166	16.7968	0.284649	1.29406	9.79631	0.625124	1.67995	12.6471	0.392262	0.70004	0.0379696	0.255959	1.20019	0.190353	0.00232172	0.764581	0.730536	0.0422463	0	0	0	0	0	0	0	0	0	0	0	0
4	1.12947	3.40671	0.51824	126.007	0.142818	0.932573	0.732537	0.420695	4.33771	1.78836	0.594694	0.0169256	20.1221	0.0356956	0.695092	1.89321	0.162411	5.22665	2.8732	0.00807452	0.751334	0.00310379	0.773076	1.41769	0.444281	0.2122	0.327735	1.07256e-05	0	0	0	0	0	0	0	0	0	0	0	0
5	0.183821	1.37109	3.43993	0.142818	29.8233	1.25269	0.337292	0.00186097	2.53143	8.66374	6.67636	5.36718	10.1099	0.0187224	0.596731	0.658995	0.13161	1.6829	0.45676	0.0286422	8.3646	0.938266	7.98287	2.17819	1.983	1.21046	0.216868	0.512159	0	0	0	0	0	0	0	0	0	0	0	0
6	10.9137	13.0891	5.20272	0.932573	1.25269	172.206	1.56689	5.31251	1.00508	11.1318	0.00889201	10.0931	13.4244	0.131601	0.514703	2.88025	4.79424	1.62298	2.44116	2.99318	3.6344	10.6725	26.3959	2.34641	0.823385	0.00085231	6.7977	2.1621	0	0	0	0	0	0	0	0	0	0	0	0
7	1.88884	5.97873	2.22584	0.732537	0.337292	1.56689	64.9245	0.860656	4.55615	0.644013	3.67864	19.7753	3.15504	0.28928	3.68305	14.6079	0.23216	4.22776	1.46816	4.34021	0.00627372	2.83753	2.99819	0.138949	0.502819	4.07007	0.000446581	0.336099	0	0	0	0	0	0	0	0	0	0	0	0
8	8.86627	2.34906	3.80585	0.420695	0.00186097	5.31251	0.860656	28.9593	1.05846	2.25082	0.3313	0.473765	3.80132	0.240214	0.687789	0.55892	4.8765	2.05387	0.0576001	0.563108	0.733794	0.0581552	1.32477	0.203995	0.26998	0.0422826	0.269948	0.0240166	0	0	0	0	0	0	0	0	0	0	0	0
9	5.75835	6.5669	9.26213	4.33771	2.53143	1.00508	4.55615	1.05846	53.0757	1.65843	4.23582	0.710312	0.060483	0.284514	10.7615	3.55935	0.0553467	6.67163	2.29652	0.466466	7.27318	2.16357	7.48128	0.136295	1.2414	1.99354	0.69299	1.02317	0	0	0	0	0	0	0	0	0	0	0	0
10	0.905946	0.0305058	0.92555	1.78836	8.66374	11.1318	0.644013	2.25082	1.65843	66.6549	15.9953	4.26068	0.0811701	0.512024	0.0305381	1.33563	0.475916	0.111572	0.00268678	0.706658	7.16973	0.0248302	5.30742	0.339247	0.959659	0.16689	0.0356835	0.176884	0	0	0	0	0	0	0	0	0	0	0	0
11	3.00836	2.05724	10.9166	0.594694	6.67636	0.00889201	3.67864	0.3313	4.23582	15.9953	42.6172	7.62258	0.00241642	2.09697	2.34605	0.0774631	3.42635	0.0515529	0.00718372	1.19137	5.02241	0.771922	0.0732712	0.329305	0.31391	0.016278	0.169451	0.00414562	0	0	0	0	0	0	0	0	0	0	0	0
12	0.238118	5.94365	16.7968	0.0169256	5.36718	10.0931	19.7753	0.473765	0.710312	4.26068	7.62258	171.05	2.65232	1.55773	3.25269	12.3763	18.1902	30.2562	1.42348	6.55105	0.638249	4.54436	3.55855	2.5589	0.0746158	0.0607203	0.152116	0.0603638	0	0	0	0	0	0	0	0	0	0	0	0
13	9.59682	2.15846	0.284649	20.1221	10.1099	13.4244	3.15504	3.80132	0.060483	0.0811701	0.00241642	2.65232	149.218	0.260045	1.13711	19.5059	0.458022	1.4812	0.333024	1.82082	10.3521	0.154486	1.73255	3.97155	3.18336	0.667294	0.314096	5.77296e-05	0	0	0	0	0	0	0	0	0	0	0	0
14	6.59462	0.62435	1.29406	0.0356956	0.0187224	0.131601	0.28928	0.240214	0.284514	0.512024	2.09697	1.55773	0.260045	19.455	0.103621	0.651464	4.71477	0.163163	1.82045	0.885545	0.168592	0.0664883	4.60936	1.60169	0.957747	1.24277	0.847143	0.00682202	0	0	0	0	0	0	0	0	0	0	0	0
15	1.76589	6.95319	9.79631	0.695092	0.596731	0.514703	3.68305	0.687789	10.7615	0.0305381	2.34605	3.25269	1.13711	0.103621	20.9201	3.88374	2.04265	1.43911	0.120702	0.685215	2.70413	0.107318	0.0427294	0.0352884	0.630043	1.40969	0.264612	0.00737374	0	0	0	0	0	0	0	0	0	0	0	0
16	5.00038	2.97351	0.625124	1.89321	0.658995	2.88025	14.6079	0.55892	3.55935	1.33563	0.0774631	12.3763	19.5059	0.651464	3.88374	27.919	1.2825	1.02814	0.525144	4.02688	0.087646	2.13966	0.155985	0.430258	0.0482541	0.869793	0.0269036	0.0394404	0	0	0	0	0	0	0	0	0	0	0	0
17	2.9157	32.2328	1.67995	0.162411	0.13161	4.79424	0.23216	4.8765	0.0553467	0.475916	3.42635	18.1902	0.458022	4.71477	2.04265	1.2825	118.21	12.9167	1.63338	1.9941	15.6534	7.78796	44.3295	1.78177	0.365784	2.36502	0.0808049	0.393169	0	0	0	0	0	0	0	0	0	0	0	0
18	20.4638	12.5107	12.6471	5.22665	1.6829	1.62298	4.22776	2.05387	6.67163	0.111572	0.0515529	30.2562	1.4812	0.163163	1.43911	1.02814	12.9167	117.697	11.4302	3.26095	0.00593335	3.5581	3.43033	4.99565	0.131334	0.309747	0.0365212	0.0282926	0	0	0	0	0	0	0	0	0	0	0	0
19	1.68042	1.7815	0.392262	2.8732	0.45676	2.44116	1.46816	0.0576001	2.29652	0.00268678	0.00718372	1.42348	0.333024	1.82045	0.120702	0.525144	1.63338	11.4302	17.7801	3.92383	0.0158267	0.196263	0.185212	1.71351	0.332417	0.0151891	0.00130356	0.0213159	0	0	0	0	0	0	0	0	0	0	0	0
20	0.862378	0.024358	0.70004	0.00807452	0.0286422	2.99318	4.34021	0.563108	0.466466	0.706658	1.19137	6.55105	1.82082	0.885545	0.685215	4.02688	1.9941	3.26095	3.92383	19.1564	3.33237	1.13505	0.0206587	0.614312	0.114188	0.0222574	0.636762	0.102337	0	0	0	0	0	0	0	0	0	0	0	0
21	0.416516	4.62311	0.0379696	0.751334	8.3646	3.6344	0.00627372	0.733794	7.27318	7.16973	5.02241	0.638249	10.3521	0.168592	2.70413	0.087646	15.6534	0.00593335	0.0158267	3.33237	31.9481	0.135324	0.0510078	1.43024	3.64333	0.242445	0.0172769	0.15051	0	0	0	0	0	0	0	0	0	0	0	0
22	0.102999	2.15192	0.255959	0.00310379	0.938266	10.6725	2.83753	0.0581552	2.16357	0.0248302	0.771922	4.54436	0.154486	0.0664883	0.107318	2.13966	7.78796	3.5581	0.196263	1.13505	0.135324	24.421	17.3061	0.944467	0.03895	0.57614	6.76007	1.64461	0	0	0	0	0	0	0	0	0	0	0	0
23	0.0542009	13.0869	1.20019	0.773076	7.98287	26.3959	2.99819	1.32477	7.48128	5.30742	0.0732712	3.55855	1.73255	4.60936	0.0427294	0.155985	44.3295	3.43033	0.185212	0.0206587	0.0510078	17.3061	78.2844	3.96708	0.721581	2.61028	4.11363	3.24096	0	0	0	0	0	0	0	0	0	0	0	0
24	1.11571	0.740058	0.190353	1.41769	2.17819	2.34641	0.138949	0.203995	0.136295	0.339247	0.329305	2.5589	3.97155	1.60169	0.0352884	0.430258	1.78177	4.99565	1.71351	0.614312	1.43024	0.944467	3.96708	3.02259	1.2602	0.701996	0.0153743	0.103767	0	0	0	0	0	0	0	0	0	0	0	0
25	0.156134	0.132107	0.00232172	0.444281	1.983	0.823385	0.502819	0.26998	1.2414	0.959659	0.31391	0.0746158	3.18336	0.957747	0.630043	0.0482541	0.365784	0.131334	0.332417	0.114188	3.64333	0.03895	0.721581	1.2602	1.5894	0.844452	0.0146875	0.0487239	0	0	0	0	0	0	0	0	0	0	0	0
26	0.736383	0.0151626	0.764581	0.2122	1.21046	0.00085231	4.07007	0.0422826	1.99354	0.16689	0.016278	0.0607203	0.667294	1.24277	1.40969	0.869793	2.36502	0.309747	0.0151891	0.0222574	0.242445	0.57614	2.61028	0.701996	0.844452	3.38479	0.757016	0.00836091	0	0	0	0	0	0	0	0	0	0	0	0
27	0.00587709	0.95661	0.730536	0.327735	0.216868	6.7977	0.000446581	0.269948	0.69299	0.0356835	0.169451	0.152116	0.314096	0.847143	0.264612	0.0269036	0.0808049	0.0365212	0.00130356	0.636762	0.0172769	6.76007	4.11363	0.0153743	0.0146875	0.757016	6.77591	1.2598	0	0	0	0	0	0	0	0	0	0	0	0
28	0.0275701	0.283502	0.0422463	1.07256e-05	0.512159	2.1621	0.336099	0.0240166	1.02317	0.176884	0.00414562	0.0603638	5.77296e-05	0.00682202	0.00737374	0.0394404	0.393169	0.0282926	0.0213159	0.102337	0.15051	1.64461	3.24096	0.103767	0.0487239	0.00836091	1.2598	0.429025	0	0	0	0	0	0	0	0	0	0	0	0
29-dimensional	195.45	0.623492	5.77	0.984113	0.250782	10.7295	1.84438	9.31418	5.98057	0.870744	2.90341	0.292342	9.6781	6.79127	1.88943	4.93813	2.85113	19.9872	1.69015	0.909941	0.436067	0.101827	0.0399099	1.05873	0.159784	0.62153	0.00365218	0.0147337	0.00221278	0	0	0	0	0	0	0	0	0	0	0
2	0.623492	96.5961	2.503	4.08364	0.985345	13.5953	5.78342	1.81929	7.16155	0.0487873	1.84624	6.59679	2.06431	0.781857	7.56247	3.09388	32.7694	11.6001	1.80636	0.0477862	4.46513	2.13865	13.6851	0.628273	0.123977	0.0874848	0.879655	0.413423	0.013554	0	0	0	0	0	0	0	0	0	0	0
3	5.77	2.503	145.977	0.281337	4.19291	4.86623	2.35779	3.06909	8.52948	0.831805	11.4635	15.6594	0.323295	1.0728	9.04504	0.567388	1.55052	13.6768	0.379784	0.817863	0.0239483	0.260943	1.01413	0.259577	0.00365804	1.12625	0.806733	0.00738152	0.0158757	0	0	0	0	0	0	0	0	0	0	0
4	0.984113	4.08364	0.281337	134.397	0.566058	1.23484	0.88447	1.07071	3.40148	1.53815	0.375152	0.0207096	20.7372	0.149385	0.355422	1.69876	0.25184	6.56198	2.80751	0.0489245	0.622466	0.00425409	1.10454	1.77611	0.413037	0.677736	0.431439	0.0523816	0.059789	0	0	0	0	0	0	0	0	0	0	0
5	0.250782	0.985345	4.19291	0.566058	34.1336	0.942898	0.444755	0.122564	3.36292	8.09157	5.86747	4.15215	10.5554	0.114262	0.28151	0.544467	0.0687136	2.48936	0.483979	0.0917975	7.91243	0.957125	7.02526	2.62608	1.91514	0.534302	0.30426	0.229678	0.0620038	0	0	0	0	0	0	0	0	0	0	0
6	10.7295	13.5953	4.86623	1.23484	0.942898	173.721	1.65182	4.63134	0.824788	11.3896	0.0246797	10.794	13.2278	0.0809805	0.388636	2.97857	4.96707	1.35709	2.46533	2.81602	3.75281	10.648	27.099	2.17734	0.840616	0.0298283	6.6247	2.44076	0.00936628	0	0	0	0	0	0	0	0	0	0	0
7	1.84438	5.78342	2.35779	0.88447	0.444755	1.65182	65.2384	0.703746	4.32506	0.680349	3.53997	19.2187	3.21089	0.34023	3.47631	14.4805	0.210769	4.49233	1.45732	4.46699	0.00375825	2.8449	3.13654	0.164374	0.510634	4.41355	2.98778e-06	0.400864	0.00316331	0	0	0	0	0	0	0	0	0	0	0
8	9.31418	1.81929	3.06909	1.07071	0.122564	4.63134	0.703746	33.4881	0.605996	1.95533	0.167251	0.952675	4.08508	0.486637	0.33625	0.450775	4.42888	1.30845	0.0678422	0.789113	0.880501	0.0534374	0.942164	0.0915038	0.296652	0.0306771	0.185741	0.159008	0.0659349	0	0	0	0	0	0	0	0	0	0	0
9	5.98057	7.16155	8.52948	3.40148	3.36292	0.824788	4.32506	0.605996	55.3518	1.50029	3.82295	1.04133	0.0407284	0.437575	11.7957	3.73911	0.0896036	5.78095	2.33497	0.590027	7.00355	2.18175	6.88461	0.212774	1.20716	1.38494	0.787044	0.741327	0.0251333	0	0	0	0	0	0	0	0	0	0	0
10	0.870744	0.0487873	0.831805	1.53815	8.09157	11.3896	0.680349	1.95533	1.50029	67.074	16.3321	4.56454	0.0712563	0.589389	0.0125528	1.29171	0.440597	0.165439	0.0021799	0.649569	7.28019	0.0240452	5.51836	0.296971	0.972042	0.254265	0.0277657	0.23219	0.00416699	0	0	0	0	0	0	0	0	0	0	0
11	2.90341	1.84624	11.4635	0.375152	5.86747	0.0246797	3.53997	0.167251	3.82295	16.3321	43.5158	8.28943	0.000391776	1.85733	2.04255	0.0958755	3.27029	0.119654	0.00867992	1.07087	5.17407	0.764727	0.0386461	0.262717	0.325556	0.0806831	0.200744	0.00128062	0.0111326	0	0	0	0	0	0	0	0	0	0	0
12	0.292342	6.59679	15.6594	0.0207096	4.15215	10.794	19.2187	0.952675	1.04133	4.56454	8.28943	176.433	2.48972	1.21191	3.92253	12.7597	18.8239	28.0402	1.45834	6.05965	0.548944	4.51419	4.05772	2.23147	0.0652166	0.000565666	0.205103	0.0052854	0.0332003	0	0	0	0	0	0	0	0	0	0	0
13	9.6781	2.06431	0.323295	20.7372	10.5554	13.2278	3.21089	4.08508	0.0407284	0.0712563	0.000391776	2.48972	149.526	0.224091	1.04528	19.3874	0.433599	1.35972	0.337199	1.887	10.2596	0.153105	1.6499	4.07701	3.16762	0.562166	0.296841	0.0012506	0.00204771	0	0	0	0	0	0	0	0	0	0	0
14	6.79127	0.781857	1.0728	0.149385	0.114262	0.0809805	0.34023	0.486637	0.437575	0.589389	1.85733	1.21191	0.224091	20.4027	0.037739	0.590038	4.94821	0.0655021	1.84882	0.757717	0.204683	0.06915	5.01406	1.41434	0.983009	1.71511	0.932635	0.00177556	0.0172609	0	0	0	0	0	0	0	0	0	0	0
15	1.88943	7.56247	9.04504	0.355422	0.28151	0.388636	3.47631	0.33625	11.7957	0.0125528	2.04255	3.92253	1.04528	0.037739	22.3475	4.07072	2.22923	1.04383	0.112112	0.832876	2.54129	0.10333	0.100902	0.0781842	0.605805	0.908319	0.211514	0.00410911	0.0249532	0	0	0	0	0	0	0	0	0	0	0
16	4.93813	3.09388	0.567388	1.69876	0.544467	2.97857	14.4805	0.450775	3.73911	1.29171	0.0958755	12.7597	19.3874	0.590038	4.07072	28.0706	1.32706	0.920848	0.530733	3.92353	0.0969772	2.13417	0.130362	0.394267	0.046207	0.741429	0.021719	0.0233412	0.002329	0	0	0	0	0	0	0	0	0	0	0
17	2.85113	32.7694	1.55052	0.25184	0.0687136	4.96707	0.210769	4.42888	0.0896036	0.440597	3.27029	18.8239	0.433599	4.94821	2.22923	1.32706	118.788	12.39	1.6468	1.89565	15.4883	7.77369	44.9462	1.6813	0.358066	2.67428	0.068428	0.475312	0.0043195	0	0	0	0	0	0	0	0	0	0	0
18	19.9872	11.6001	13.6768	6.56198	2.48936	1.35709	4.49233	1.30845	5.78095	0.165439	0.119654	28.0402	1.35972	0.0655021	1.04383	0.920848	12.39	122.217	11.3317	3.62594	0.0183144	3.58503	2.97037	5.48262	0.118696	0.0811841	0.0646677	3.24507e-05	0.0335508	0	0	0	0	0	0	0	0	0	0	0
19	1.69015	1.80636	0.379784	2.80751	0.483979	2.46533	1.45732	0.0678422	2.33497	0.0021799	0.00867992	1.45834	0.337199	1.84882	0.112112	0.530733	1.6468	11.3317	17.7888	3.89631	0.0148059	0.195817	0.177461	1.69386	0.333877	0.0202952	0.00100071	0.0178746	0.000167941	0	0	0	0	0	0	0	0	0	0	0
20	0.909941	0.0477862	0.817863	0.0489245	0.0917975	2.81602	4.46699	0.789113	0.590027	0.649569	1.07087	6.05965	1.887	0.757717	0.832876	3.92353	1.89565	3.62594	3.89631	19.5692	3.23166	1.1423	0.00678941	0.69641	0.1085	0.000387459	0.589585	0.16226	0.00762696	0	0	0	0	0	0	0	0	0	0	0
21	0.436067	4.46513	0.0239483	0.622466	7.91243	3.75281	0.00375825	0.880501	7.00355	7.28019	5.17407	0.548944	10.2596	0.204683	2.54129	0.0969772	15.4883	0.0183144	0.0148059	3.23166	32.1346	0.133847	0.0687473	1.35923	3.66264	0.323915	0.0129018	0.191051	0.00267864	0	0	0	0	0	0	0	0	0	0	0
22	0.101827	2.13865	0.260943	0.00425409	0.957125	10.648	2.8449	0.0534374	2.18175	0.0240452	0.764727	4.51419	0.153105	0.06915	0.10333	2.13417	7.77369	3.58503	0.195817	1.1423	0.133847	24.4235	17.2692	0.951622	0.0391941	0.590467	6.77142	1.62925	4.00074e-05	0	0	0	0	0	0	0	0	0	0	0
23	0.0399099	13.6851	1.01413	1.10454	7.02526	27.099	3.13654	0.942164	6.88461	5.51836	0.0386461	4.05772	1.6499	5.01406	0.100902	0.130362	44.9462	2.97037	0.177461	0.00678941	0.0687473	17.2692	79.71	3.70724	0.740641	3.18613	3.95537	3.64307	0.0130403	0	0	0	0	0	0	0	0	0	0	0
24	1.05873	0.628273	0.259577	1.77611	2.62608	2.17734	0.164374	0.0915038	0.212774	0.296971	0.262717	2.23147	4.07701	1.41434	0.0781842	0.394267	1.6813	5.48262	1.69386	0.69641	1.35923	0.951622	3.70724	3.21639	1.23958	0.486905	0.0245173	0.0540349	0.00892162	0	0	0	0	0	0	0	0	0	0	0
25	0.159784	0.123977	0.00365804	0.413037	1.91514	0.840616	0.510634	0.296652	1.20716	0.972042	0.325556	0.0652166	3.16762	0.983009	0.605805	0.046207	0.358066	0.118696	0.333877	0.1085	3.66264	0.0391941	0.740641	1.23958	1.59331	0.888257	0.0160446	0.0556025	0.000251849	0	0	0	0	0	0	0	0	0	0	0
26	0.62153	0.0874848	1.12625	0.677736	0.534302	0.0298283	4.41355	0.0306771	1.38494	0.254265	0.0806831	0.000565666	0.562166	1.71511	0.908319	0.741429	2.67428	0.0811841	0.0202952	0.000387459	0.323915	0.590467	3.18613	0.486905	0.888257	4.82829	0.908691	0.102629	0.0581386	0	0	0	0	0	0	0	0	0	0	0
27	0.00365218	0.879655	0.806733	0.431439	0.30426	6.6247	2.98778e-06	0.185741	0.787044	0.0277657	0.200744	0.205103	0.296841	0.932635	0.211514	0.021719	0.068428	0.0646677	0.00100071	0.589585	0.0129018	6.77142	3.95537	0.0245173	0.0160446	0.908691	6.87704	1.14308	0.00314687	0	0	0	0	0	0	0	0	0	0	0
28	0.0147337	0.413423	0.00738152	0.0523816	0.229678	2.44076	0.400864	0.159008	0.741327	0.23219	0.00128062	0.0052854	0.0012506	0.00177556	0.00410911	0.0233412	0.475312	3.24507e-05	0.0178746	0.16226	0.191051	1.62925	3.64307	0.0540349	0.0556025	0.102629	1.14308	0.6425	0.0238309	0	0	0	0	0	0	0	0	0	0	0
29	0.00221278	0.013554	0.0158757	0.059789	0.0620038	0.00936628	0.00316331	0.0659349	0.0251333	0.00416699	0.0111326	0.0332003	0.00204771	0.0172609	0.0249532	0.002329	0.0043195	0.0335508	0.000167941	0.00762696	0.00267864	4.00074e-05	0.0130403	0.00892162	0.000251849	0.0581386	0.00314687	0.0238309	0.0264388	0	0	0	0	0	0	0	0	0	0	0
30-dimensional	205.163	0.971238	5.15829	1.28598	0.0815623	9.69882	1.91941	8.6466	5.16126	0.850022	2.24588	0.505194	7.28443	5.88188	2.27439	4.44716	2.88411	21.8574	1.61788	1.5574	1.20917	0.479276	0.350532	1.1429	0.602448	0.789007	0.0199552	0.00910559	0.00264438	0.0408037	0	0	0	0	0	0	0	0	0	0
2	0.971238	98.8067	2.74502	4.41778	0.756563	12.9247	5.70857	1.65178	7.70201	0.046011	2.17847	6.10748	1.44381	0.97497	7.14901	2.87042	32.833	10.8186	1.84973	0.00257506	5.58772	1.56095	15.3921	0.592494	0.321482	0.124467	1.10888	0.269588	0.0129776	0.0132962	0	0	0	0	0	0	0	0	0	0
3	5.15829	2.74502	147.186	0.34172	3.86351	4.59858	2.32586	3.21978	8.92081	0.824052	11.9999	15.1502	0.169287	1.22037	8.74126	0.504118	1.55978	13.106	0.393108	1.0333	0.000163698	0.135778	1.33788	0.244219	0.0416433	1.04683	0.950849	1.03751e-05	0.0162998	0.00593627	0	0	0	0	0	0	0	0	0	0
4	1.28598	4.41778	0.34172	135.763	0.707954	1.09098	0.905883	1.16822	3.14159	1.54963	0.486425	0.00540788	22.3188	0.212785	0.424353	1.82322	0.255899	7.00258	2.76869	0.00990603	0.942272	0.0482364	1.47204	1.82062	0.637489	0.74749	0.328777	0.0193681	0.0589054	0.00698475	0	0	0	0	0	0	0	0	0	0
5	0.0815623	0.756563	3.86351	0.707954	35.7285	1.14955	0.467924	0.176355	3.77421	8.13147	6.50774	4.59816	12.3008	0.203731	0.37738	0.654423	0.0655501	2.91041	0.508804	0.014065	9.53789	1.46977	5.78181	2.70824	2.6242	0.446657	0.18073	0.378466	0.0606425	0.0160438	0	0	0	0	0	0	0	0	0	0
6	9.69882	12.9247	4.59858	1.09098	1.14955	175.725	1.61894	4.85944	0.979722	11.4251	0.0643111	11.3256	14.6739	0.136548	0.314318	3.16532	4.94669	1.59025	2.42403	2.37128	4.59535	11.8235	25.2134	2.23334	1.19636	0.0158156	6.14569	2.76954	0.0097693	0.00901392	0	0	0	0	0	0	0	0	0	0
7	1.91941	5.70857	2.32586	0.905883	0.467924	1.61894	65.2736	0.688928	4.26768	0.678881	3.60181	19.3378	3.32965	0.357243	3.51611	14.5494	0.210057	4.56168	1.45192	4.36847	0.00927631	2.94612	3.24825	0.166977	0.468656	4.44706	0.000316962	0.379282	0.00312414	0.00025918	0	0	0	0	0	0	0	0	0	0
8	8.6466	1.65178	3.21978	1.16822	0.176355	4.85944	0.688928	33.9079	0.521396	1.96549	0.226207	0.847943	4.6436	0.571942	0.388404	0.501544	4.41558	1.16099	0.072677	0.628635	0.633225	0.0121041	0.711168	0.0837947	0.178468	0.0430873	0.246465	0.107832	0.0652062	0.00429986	0	0	0	0	0	0	0	0	0	0
9	5.16126	7.70201	8.92081	3.14159	3.77421	0.979722	4.26768	0.521396	56.6674	1.51417	4.24008	0.87306	4.4837e-05	0.566964	11.336	3.52052	0.0925779	5.29401	2.37863	0.383552	8.22962	2.77537	5.88219	0.231917	1.6621	1.26851	0.616347	0.942311	0.0244349	0.010451	0	0	0	0	0	0	0	0	0	0
10	0.850022	0.046011	0.824052	1.54963	8.13147	11.4251	0.678881	1.96549	1.51417	67.0799	16.3861	4.58822	0.0785958	0.58039	0.0115976	1.28334	0.441018	0.160068	0.00226614	0.634232	7.35755	0.0279601	5.45853	0.298396	0.996355	0.250996	0.0256208	0.239041	0.00418543	4.32329e-05	0	0	0	0	0	0	0	0	0	0
11	2.24588	2.17847	11.9999	0.486425	6.50774	0.0643111	3.60181	0.226207	4.24008	16.3861	45.1514	8.88572	0.0709045	2.16377	1.82057	0.142475	3.29139	0.0499856	0.00583021	0.73772	6.4387	1.20507	0.186	0.287897	0.633283	0.0503048	0.323435	0.0273883	0.0116929	0.0146047	0	0	0	0	0	0	0	0	0	0
12	0.505194	6.10748	15.1502	0.00540788	4.59816	11.3256	19.3378	0.847943	0.87306	4.58822	8.88572	178.679	3.1758	1.41717	4.18907	13.1642	18.782	29.1238	1.4249	5.3634	0.273739	5.33435	3.31224	2.29127	0.00473389	0.000661649	0.30564	0.00120766	0.0339967	0.0100228	0	0	0	0	0	0	0	0	0	0
13	7.28443	1.44381	0.169287	22.3188	12.3008	14.6739	3.32965	4.6436	4.4837e-05	0.0785958	0.0709045	3.1758	161.867	0.0657338	1.39881	20.6044	0.418342	0.847464	0.377514	1.04175	13.9161	0.00322028	0.661833	4.27382	4.98057	0.39672	0.619331	0.0505892	0.00159913	0.0588103	0	0	0	0	0	0	0	0	0	0
14	5.88188	0.97497	1.22037	0.212785	0.203731	0.136548	0.357243	0.571942	0.566964	0.58039	2.16377	1.41717	0.0657338	21.2718	0.0700136	0.685329	4.97105	0.0219731	1.88928	1.05133	0.0488672	0.211161	5.98205	1.36453	0.629161	1.85567	0.738737	0.00519161	0.0166596	0.0113192	0	0	0	0	0	0	0	0	0	0
15	2.27439	7.14901	8.74126	0.424353	0.37738	0.314318	3.51611	0.388404	11.336	0.0115976	1.82057	4.18907	1.39881	0.0700136	22.8415	4.25068	2.21794	1.21275	0.119554	1.05482	2.02552	0.217783	0.027225	0.0696978	0.39923	0.983921	0.145481	0.022043	0.025495	0.00617871	0	0	0	0	0	0	0	0	0	0
16	4.44716	2.87042	0.504118	1.82322	0.654423	3.16532	14.5494	0.501544	3.52052	1.28334	0.142475	13.1642	20.6044	0.685329	4.25068	28.4688	1.31966	1.05505	0.517296	3.54816	0.208406	2.50955	0.240727	0.411085	0.00820948	0.799341	0.0065201	0.00658703	0.00247085	0.00445245	0	0	0	0	0	0	0	0	0	0
17	2.88411	32.833	1.55978	0.255899	0.0655501	4.94669	0.210057	4.41558	0.0925779	0.441018	3.29139	18.782	0.418342	4.97105	2.21794	1.31966	118.794	12.3492	1.64884	1.91869	15.5865	7.71477	45.0956	1.67835	0.370962	2.68356	0.0714546	0.466869	0.00430317	3.28441e-05	0	0	0	0	0	0	0	0	0	0
18	21.8574	10.8186	13.106	7.00258	2.91041	1.59025	4.56168	1.16099	5.29401	0.160068	0.0499856	29.1238	0.847464	0.0219731	1.21275	1.05505	12.3492	124.926	11.2193	2.98936	0.0159793	4.47656	2.2193	5.59513	0.323568	0.0508092	0.0179873	0.0152494	0.0326008	0.0144871	0	0	0	0	0	0	0	0	0	0
19	1.61788	1.84973	0.393108	2.76869	0.508804	2.42403	1.45192	0.072677	2.37863	0.00226614	0.00583021	1.4249	0.377514	1.88928	0.119554	0.517296	1.64884	11.2193	17.8082	3.99193	0.024852	0.169708	0.151432	1.68532	0.299208	0.0226924	0.00231824	0.0229363	0.000158768	0.000273538	0	0	0	0	0	0	0	0	0	0
20	1.5574	0.00257506	1.0333	0.00990603	0.014065	2.37128	4.36847	0.628635	0.383552	0.634232	0.73772	5.3634	1.04175	1.05133	1.05482	3.54816	1.91869	2.98936	3.99193	21.8618	2.02008	0.561021	0.175163	0.64022	4.67328e-05	0.0110825	0.35405	0.346432	0.00829709	0.0299576	0	0	0	0	0	0	0	0	0	0
21	1.20917	5.58772	0.000163698	0.942272	9.53789	4.59535	0.00927631	0.633225	8.22962	7.35755	6.4387	0.273739	13.9161	0.0488672	2.02552	0.208406	15.5865	0.0159793	0.024852	2.02008	38.8254	0.711561	0.0575646	1.4816	5.73916	0.194726	0.0209051	0.510661	0.0032909	0.0668532	0	0	0	0	0	0	0	0	0	0
22	0.479276	1.56095	0.135778	0.0482364	1.46977	11.8235	2.94612	0.0121041	2.77537	0.0279601	1.20507	5.33435	0.00322028	0.211161	0.217783	2.50955	7.71477	4.47656	0.169708	0.561021	0.711561	28.5995	13.9056	1.03864	0.0446891	0.769206	5.67801	2.28671	2.42845e-06	0.0482539	0	0	0	0	0	0	0	0	0	0
23	0.350532	15.3921	1.33788	1.47204	5.78181	25.2134	3.24825	0.711168	5.88219	5.45853	0.186	3.31224	0.661833	5.98205	0.027225	0.240727	45.0956	2.2193	0.151432	0.175163	0.0575646	13.9056	87.918	3.53275	0.185152	3.60679	4.9256	2.75844	0.011921	0.0533166	0	0	0	0	0	0	0	0	0	0
24	1.1429	0.592494	0.244219	1.82062	2.70824	2.23334	0.166977	0.0837947	0.231917	0.298396	0.287897	2.29127	4.27382	1.36453	0.0696978	0.411085	1.67835	5.59513	1.68532	0.64022	1.4816	1.03864	3.53275	3.23323	1.33951	0.470745	0.0176895	0.06646	0.00882509	0.000557599	0	0	0	0	0	0	0	0	0	0
25	0.602448	0.321482	0.0416433	0.637489	2.6242	1.19636	0.468656	0.178468	1.6621	0.996355	0.633283	0.00473389	4.98057	0.629161	0.39923	0.00820948	0.370962	0.323568	0.299208	4.67328e-05	5.73916	0.0446891	0.185152	1.33951	2.8063	0.693725	0.121046	0.224321	0.000427583	0.0490986	0	0	0	0	0	0	0	0	0	0
26	0.789007	0.124467	1.04683	0.74749	0.446657	0.0158156	4.44706	0.0430873	1.26851	0.250996	0.0503048	0.000661649	0.39672	1.85567	0.983921	0.799341	2.68356	0.0508092	0.0226924	0.0110825	0.194726	0.769206	3.60679	0.470745	0.693725	4.95691	0.800211	0.0661781	0.057525	0.00345698	0	0	0	0	0	0	0	0	0	0
27	0.0199552	1.10888	0.950849	0.328777	0.18073	6.14569	0.000316962	0.246465	0.616347	0.0256208	0.323435	0.30564	0.619331	0.738737	0.145481	0.0065201	0.0714546	0.0179873	0.00231824	0.35405	0.0209051	5.67801	4.9256	0.0176895	0.121046	0.800211	7.51284	0.886847	0.00344255	0.0140948	0	0	0	0	0	0	0	0	0	0
28	0.00910559	0.269588	1.03751e-05	0.0193681	0.378466	2.76954	0.379282	0.107832	0.942311	0.239041	0.0273883	0.00120766	0.0505892	0.00519161	0.022043	0.00658703	0.466869	0.0152494	0.0229363	0.346432	0.510661	2.28671	2.75844	0.06646	0.224321	0.0661781	0.886847	0.88084	0.0246935	0.0162857	0	0	0	0	0	0	0	0	0	0
29	0.00264438	0.0129776	0.0162998	0.0589054	0.0606425	0.0097693	0.00312414	0.0652062	0.0244349	0.00418543	0.0116929	0.0339967	0.00159913	0.0166596	0.025495	0.00247085	0.00430317	0.0326008	0.000158768	0.00829709	0.0032909	2.42845e-06	0.011921	0.00882509	0.000427583	0.057525	0.00344255	0.0246935	0.026457	6.65707e-06	0	0	0	0	0	0	0	0	0	0
30	0.0408037	0.0132962	0.00593627	0.00698475	0.0160438	0.00901392	0.00025918	0.00429986	0.010451	4.32329e-05	0.0146047	0.0100228	0.0588103	0.0113192	0.00617871	0.00445245	3.28441e-05	0.0144871	0.000273538	0.0299576	0.0668532	0.0482539	0.0533166	0.000557599	0.0490986	0.00345698	0.0140948	0.0162857	6.65707e-06	0.0141372	0	0	0	0	0	0	0	0	0	0
31-dimensional	206.018	0.995055	6.35676	1.29218	0.0686679	9.38754	1.91347	9.13241	5.04004	1.1077	2.26856	0.545685	8.34105	6.17423	2.04601	4.418	2.36239	21.1213	1.38203	1.04658	0.873241	0.737577	0.536021	1.56324	0.602864	0.889266	0.0037635	0.00274372	0.00327967	0.0367333	0.0148679	0	0	0	0	0	0	0	0	0
2	0.995055	98.9029	2.42159	4.42241	0.740166	12.7793	5.7127	1.73716	7.76209	0.0713076	2.16951	6.05203	1.63255	0.928214	7.31729	2.86098	32.0934	11.0299	1.95674	0.0199622	5.27786	1.39795	15.8377	0.48551	0.321604	0.140503	1.04217	0.28788	0.0248603	0.0123537	0.0024091	0	0	0	0	0	0	0	0	0
3	6.35676	2.42159	202.435	0.315481	4.67824	6.58798	2.27132	6.13677	7.62775	0.0346089	12.4422	17.0276	1.37738	2.57194	5.31377	0.589916	6.76239	8.73039	0.0326431	8.42005	1.95145	3.11232	0.000301497	4.05269	0.0407307	2.19635	2.70573	0.127829	1.07879	0.0268009	1.04441	0	0	0	0	0	0	0	0	0
4	1.29218	4.42241	0.315481	135.769	0.711586	1.08137	0.905509	1.15216	3.13289	1.52003	0.485462	0.00503832	22.1555	0.207786	0.415135	1.82493	0.241182	6.96416	2.73941	0.0144287	0.913151	0.0551647	1.50331	1.86567	0.637528	0.756181	0.33722	0.0204804	0.0638341	0.00682743	0.000124588	0	0	0	0	0	0	0	0	0
5	0.0686679	0.740166	4.67824	0.711586	35.951	1.23639	0.46561	0.126487	3.85695	7.55473	6.47738	4.69319	11.2762	0.163524	0.305788	0.663295	0.146904	2.70055	0.623072	0.087673	8.74991	1.80566	5.26244	3.1994	2.62489	0.390776	0.238327	0.337828	0.110243	0.0140433	0.00925862	0	0	0	0	0	0	0	0	0
6	9.38754	12.7793	6.58798	1.08137	1.23639	177.988	1.62818	4.2718	1.07149	9.9839	0.0580093	11.6454	12.3292	0.0723528	0.478698	3.20707	6.23209	1.27006	1.94382	3.6853	3.47751	13.8363	22.8939	3.24166	1.19736	0.00110969	6.83298	2.53291	0.00717364	0.00600339	0.0423938	0	0	0	0	0	0	0	0	0
7	1.91347	5.7127	2.27132	0.905509	0.46561	1.62818	65.2761	0.679235	4.27566	0.663501	3.60387	19.3201	3.37947	0.36238	3.53711	14.5456	0.19956	4.5861	1.46867	4.30111	0.0117055	2.90515	3.21204	0.156494	0.468682	4.43047	0.000554666	0.375478	0.00231133	0.000283679	7.69143e-05	0	0	0	0	0	0	0	0	0
8	9.13241	1.73716	6.13677	1.15216	0.126487	4.2718	0.679235	36.5485	0.632602	3.09172	0.246237	0.994249	7.136	0.844294	0.697981	0.475114	2.75887	0.740747	4.15406e-05	0.0319146	0.118879	0.31894	1.50263	0.615217	0.179088	0.00337258	0.510763	0.0444543	0.00171803	0.00880007	0.110865	0	0	0	0	0	0	0	0	0
9	5.04004	7.76209	7.62775	3.13289	3.85695	1.07149	4.27566	0.632602	57.0314	1.23906	4.21216	0.826736	0.0267032	0.489182	11.8117	3.49719	0.0253509	5.62777	2.65351	0.675084	7.39941	3.29687	5.2869	0.415494	1.66273	1.16001	0.73438	0.868645	0.0645575	0.00863593	0.0120288	0	0	0	0	0	0	0	0	0
10	1.1077	0.0713076	0.0346089	1.52003	7.55473	9.9839	0.663501	3.09172	1.23906	76.7561	16.6545	4.0797	1.22666	0.25141	0.0539412	1.35289	1.87531	0.00278578	0.139792	0.0351366	11.798	0.314897	8.69684	0.060729	0.994014	0.548282	0.0359026	0.458578	0.291714	0.00268341	0.284441	0	0	0	0	0	0	0	0	0
11	2.26856	2.16951	12.4422	0.485462	6.47738	0.0580093	3.60387	0.246237	4.21216	16.6545	45.1771	8.84364	0.0986708	2.20831	1.7679	0.141155	3.44107	0.0414075	0.010147	0.643216	6.65245	1.11436	0.156691	0.240802	0.633175	0.0567091	0.346838	0.0311107	0.0183951	0.0152438	0.0009514	0	0	0	0	0	0	0	0	0
12	0.545685	6.05203	17.0276	0.00503832	4.69319	11.6454	19.3201	0.994249	0.826736	4.0797	8.84364	179.379	2.57607	1.28755	3.8965	13.2113	20.1134	28.3269	1.21765	6.38317	0.459439	6.07884	2.85208	2.83374	0.00469939	0.00592601	0.228509	3.07722e-05	0.00682595	0.00817813	0.0130326	0	0	0	0	0	0	0	0	0
13	8.34105	1.63255	1.37738	22.1555	11.2762	12.3292	3.37947	7.136	0.0267032	1.22666	0.0986708	2.57607	193.805	0.0146418	2.80675	20.2078	0.140864	0.174131	1.31601e-05	0.164056	22.8215	0.997505	2.89475	0.843855	4.97299	0.95428	1.67317	0.247746	0.421125	0.0948931	0.597318	0	0	0	0	0	0	0	0	0
14	6.17423	0.928214	2.57194	0.207786	0.163524	0.0723528	0.36238	0.844294	0.489182	0.25141	2.20831	1.28755	0.0146418	22.3818	0.176142	0.662638	6.50952	0.000104378	1.39763	2.17325	0.0117708	0.0161851	4.69284	2.34022	0.63001	1.56996	0.490037	0.0249465	0.00771292	0.0161354	0.0592046	0	0	0	0	0	0	0	0	0
15	2.04601	7.31729	5.31377	0.415135	0.305788	0.478698	3.53711	0.697981	11.8117	0.0539412	1.7679	3.8965	2.80675	0.176142	24.8176	4.17661	1.14324	1.71108	0.00897817	2.60162	0.986107	0.00108262	0.28077	0.541809	0.400114	0.721341	0.0300167	0.0679058	0.196067	0.0111384	0.10088	0	0	0	0	0	0	0	0	0
16	4.418	2.86098	0.589916	1.82493	0.663295	3.20707	14.5456	0.475114	3.49719	1.35289	0.141155	13.2113	20.2078	0.662638	4.17661	28.486	1.40706	1.01752	0.48562	3.74758	0.174876	2.63352	0.273691	0.466798	0.0081982	0.822227	0.00985993	0.00830862	0.000599171	0.0041379	0.000801085	0	0	0	0	0	0	0	0	0
17	2.36239	32.0934	6.76239	0.241182	0.146904	6.23209	0.19956	2.75887	0.0253509	1.87531	3.44107	20.1134	0.140864	6.50952	1.14324	1.40706	138.552	9.51722	0.582571	6.76431	23.4307	13.5243	35.5009	5.17556	0.369198	1.80168	0.488908	0.203086	0.272312	0.00379633	0.434283	0	0	0	0	0	0	0	0	0
18	21.1213	11.0299	8.73039	6.96416	2.70055	1.27006	4.5861	0.740747	5.62777	0.00278578	0.0414075	28.3269	0.174131	0.000104378	1.71108	1.01752	9.51722	129.694	13.003	1.27777	0.320246	2.79769	3.46894	3.5461	0.322756	0.13772	0.00617106	0.0566604	0.0118148	0.0218683	0.105296	0	0	0	0	0	0	0	0	0
19	1.38203	1.95674	0.0326431	2.73941	0.623072	1.94382	1.46867	4.15406e-05	2.65351	0.139792	0.010147	1.21765	1.31601e-05	1.39763	0.00897817	0.48562	0.582571	13.003	20.5318	1.61678	0.14117	0.0158421	0.00400214	0.508204	0.298261	0.107229	0.0440801	0.000154595	0.132234	0.000284118	0.155084	0	0	0	0	0	0	0	0	0
20	1.04658	0.0199622	8.42005	0.0144287	0.087673	3.6853	4.30111	0.0319146	0.675084	0.0351366	0.643216	6.38317	0.164056	2.17325	2.60162	3.74758	6.76431	1.27777	1.61678	40.5939	0.0310857	4.01756	0.406366	4.69314	7.84715e-05	0.0945278	5.52324e-05	0.833693	0.828966	0.0630171	0.844954	0	0	0	0	0	0	0	0	0
21	0.873241	5.27786	1.95145	0.913151	8.74991	3.47751	0.0117055	0.118879	7.39941	11.798	6.65245	0.459439	22.8215	0.0117708	0.986107	0.174876	23.4307	0.320246	0.14117	0.0310857	51.0522	0.00611002	0.286649	0.0458438	5.73205	0.553992	0.344468	0.907913	0.434241	0.0997241	0.455487	0	0	0	0	0	0	0	0	0
22	0.737577	1.39795	3.11232	0.0551647	1.80566	13.8363	2.90515	0.31894	3.29687	0.314897	1.11436	6.07884	0.997505	0.0161851	0.00108262	2.63352	13.5243	2.79769	0.0158421	4.01756	0.00611002	39.4038	8.6862	4.12336	0.0453243	1.39855	8.00253	1.61789	0.369884	0.0262307	0.463119	0	0	0	0	0	0	0	0	0
23	0.536021	15.8377	0.000301497	1.50331	5.26244	22.8939	3.21204	1.50263	5.2869	8.69684	0.156691	2.85208	2.89475	4.69284	0.28077	0.273691	35.5009	3.46894	0.00400214	0.406366	0.286649	8.6862	100.683	1.05829	0.184069	4.64913	3.40103	3.4705	0.383734	0.0332553	0.327696	0	0	0	0	0	0	0	0	0
24	1.56324	0.48551	4.05269	1.86567	3.1994	3.24166	0.156494	0.615217	0.415494	0.060729	0.240802	2.83374	0.843855	2.34022	0.541809	0.466798	5.17556	3.5461	0.508204	4.69314	0.0458438	4.12336	1.05829	8.40366	1.34328	0.125011	0.382426	1.3261e-05	0.568717	0.00153596	0.548523	0	0	0	0	0	0	0	0	0
25	0.602864	0.321604	0.0407307	0.637528	2.62489	1.19736	0.468682	0.179088	1.66273	0.994014	0.633175	0.00469939	4.97299	0.63001	0.400114	0.0081982	0.369198	0.322756	0.298261	7.84715e-05	5.73205	0.0453243	0.184069	1.34328	2.80631	0.692906	0.120547	0.223955	0.000388125	0.0490574	1.20179e-06	0	0	0	0	0	0	0	0	0
26	0.889266	0.140503	2.19635	0.756181	0.390776	0.00110969	4.43047	0.00337258	1.16001	0.548282	0.0567091	0.00592601	0.95428	1.56996	0.721341	0.822227	1.80168	0.13772	0.107229	0.0945278	0.553992	1.39855	4.64913	0.125011	0.692906	5.41432	1.08406	0.113051	0.192969	0.00158589	0.0500581	0	0	0	0	0	0	0	0	0
27	0.0037635	1.04217	2.70573	0.33722	0.238327	6.83298	0.000554666	0.510763	0.73438	0.0359026	0.346838	0.228509	1.67317	0.490037	0.0300167	0.00985993	0.488908	0.00617106	0.0440801	5.52324e-05	0.344468	8.00253	3.40103	0.382426	0.120547	1.08406	8.73202	0.683004	0.122354	0.0214377	0.106658	0	0	0	0	0	0	0	0	0
28	0.00274372	0.28788	0.127829	0.0204804	0.337828	2.53291	0.375478	0.0444543	0.868645	0.458578	0.0311107	3.07722e-05	0.247746	0.0249465	0.0679058	0.00830862	0.203086	0.0566604	0.000154595	0.833693	0.907913	1.61789	3.4705	1.3261e-05	0.223955	0.113051	0.683004	1.00125	0.0985576	0.0203153	0.0309408	0	0	0	0	0	0	0	0	0
29	0.00327967	0.0248603	1.07879	0.0638341	0.110243	0.00717364	0.00231133	0.00171803	0.0645575	0.291714	0.0183951	0.00682595	0.421125	0.00771292	0.196067	0.000599171	0.272312	0.0118148	0.132234	0.828966	0.434241	0.369884	0.383734	0.568717	0.000388125	0.192969	0.122354	0.0985576	0.312036	0.00161982	0.1973	0	0	0	0	0	0	0	0	0
30	0.0367333	0.0123537	0.0268009	0.00682743	0.0140433	0.00600339	0.000283679	0.00880007	0.00863593	0.00268341	0.0152438	0.00817813	0.0948931	0.0161354	0.0111384	0.0041379	0.00379633	0.0218683	0.000284118	0.0630171	0.0997241	0.0262307	0.0332553	0.00153596	0.0490574	0.00158589	0.0214377	0.0203153	0.00161982	0.0150022	0.00178556	0	0	0	0	0	0	0	0	0
31	0.0148679	0.0024091	1.04441	0.000124588	0.00925862	0.0423938	7.69143e-05	0.110865	0.0120288	0.284441	0.0009514	0.0130326	0.597318	0.0592046	0.10088	0.000801085	0.434283	0.105296	0.155084	0.844954	0.455487	0.463119	0.327696	0.548523	1.20179e-06	0.0500581	0.106658	0.0309408	0.1973	0.00178556	0.248303	0	0	0	0	0	0	0	0	0
32-dimensional	217.27	1.17249	6.79825	0.689204	0.534659	6.57558	2.71606	10.1649	1.17549	0.740054	2.21765	0.4627	12.5982	6.34401	0.00650524	6.02496	3.77711	14.5232	0.0379536	1.70757	0.343754	0.0089727	1.66865	2.84447	0.809987	2.95863	0.0803551	0.333424	0.00478092	0.0326065	0.564843	0.371146	0	0	0	0	0	0	0	0
2	1.17249	99.2773	2.36286	4.14262	0.928906	12.0037	5.43698	1.83516	9.25412	0.0504653	2.18057	6.11565	2.02652	0.91385	9.23125	3.13015	33.1171	12.2096	2.60868	0.00619638	4.93095	1.93946	16.8352	0.360686	0.353251	0.298346	0.892685	0.456225	0.016846	0.000844151	0.035322	0.0180521	0	0	0	0	0	0	0	0
3	6.79825	2.36286	202.98	0.396791	4.23739	7.17123	2.45243	6.32149	6.26729	0.0205209	12.4155	16.9204	1.74457	2.59623	3.87625	0.47549	6.30001	7.72852	0.159189	8.05754	2.17397	2.40848	0.0201444	4.4531	0.0303867	2.73894	2.96412	0.247726	1.02113	0.0607942	1.3505	0.0183889	0	0	0	0	0	0	0	0
4	0.689204	4.14262	0.396791	141.491	1.47733	2.0619	0.550126	1.45245	7.23693	1.16755	0.466868	0.000606179	27.3652	0.233032	3.39333	2.65841	0.0285265	10.6349	5.9174	0.119036	1.51679	0.981565	0.612285	1.04055	0.490725	0.0643237	0.0944783	0.126832	0.12451	0.142652	0.238082	0.233213	0	0	0	0	0	0	0	0
5	0.534659	0.928906	4.23739	1.47733	43.1001	0.255856	0.130435	0.31063	0.308799	6.3273	6.37285	5.00563	17.3078	0.198512	5.6934	1.54324	0.768051	6.73647	0.160378	0.409957	11.4271	6.25267	8.83817	1.5862	2.16169	2.45799	0.00488272	1.80976	0.235599	0.324984	0.445692	0.546217	0	0	0	0	0	0	0	0
6	6.57558	12.0037	7.17123	2.0619	0.255856	195.627	0.872262	3.43008	6.42507	11.6148	0.0690691	11.1354	7.05943	0.0506907	6.99074	1.78278	3.88601	0.0127721	0.0161638	2.41238	2.00225	6.18929	16.498	5.58882	1.57214	0.942006	9.36033	0.605064	0.0061804	0.162736	1.039	0.619448	0	0	0	0	0	0	0	0
7	2.71606	5.43698	2.45243	0.550126	0.130435	0.872262	68.238	0.879806	1.62066	0.466442	3.64819	18.9697	1.91985	0.33495	0.716093	12.7622	0.0283727	2.57342	0.292054	3.53317	0.0169449	1.10592	4.73215	0.482008	0.360022	6.95304	0.0451644	1.08982	0.00147986	0.0566424	0.178327	0.17396	0	0	0	0	0	0	0	0
8	10.1649	1.83516	6.32149	1.45245	0.31063	3.43008	0.879806	37.4178	1.67545	2.80797	0.239038	0.94474	8.73571	0.871315	2.20537	0.707114	3.36989	0.273799	0.172384	0.090369	0.0380682	0.0239687	2.15033	0.944601	0.226863	0.0761662	0.74462	0.00358953	0.000166294	0.0644301	0.364381	0.0685927	0	0	0	0	0	0	0	0
9	1.17549	9.25412	6.26729	7.23693	0.308799	6.42507	1.62066	1.67545	121.797	2.8563	4.42418	1.17678	4.61549	0.35708	63.5579	8.57705	1.90239	22.3549	20.9109	0.000896996	2.80607	1.09499	0.383859	3.81834	2.75663	1.57592	3.57949	0.918546	0.015714	1.0493	3.99819	3.34382	0	0	0	0	0	0	0	0
10	0.740054	0.0504653	0.0205209	1.16755	6.3273	11.6148	0.466442	2.80797	2.8563	78.4391	16.7235	3.96313	0.606641	0.268607	0.269097	1.79137	2.46942	0.196124	0.0128975	0.107883	10.6392	1.07138	7.13372	0.000876636	1.12023	0.125499	0.000327726	0.132616	0.363529	0.0177423	0.048577	0.091679	0	0	0	0	0	0	0	0
11	2.21765	2.18057	12.4155	0.466868	6.37285	0.0690691	3.64819	0.239038	4.42418	16.7235	45.1871	8.82836	0.0812559	2.20388	1.94891	0.129749	3.50766	0.0566361	0.0033208	0.62337	6.57375	1.02763	0.176768	0.259987	0.641846	0.0416096	0.329217	0.0221122	0.0199331	0.0114716	1.00626e-05	0.000716934	0	0	0	0	0	0	0	0
12	0.4627	6.11565	16.9204	0.000606179	5.00563	11.1354	18.9697	0.94474	1.17678	3.96313	8.82836	179.616	2.9071	1.29922	4.85087	13.6019	20.6686	29.6044	1.56698	6.60181	0.390833	6.81072	3.14509	2.61597	0.00761017	0.0016429	0.281083	0.00804572	0.00403252	0.0215283	0.000358835	0.00848816	0	0	0	0	0	0	0	0
13	12.5982	2.02652	1.74457	27.3652	17.3078	7.05943	1.91985	8.73571	4.61549	0.606641	0.0812559	2.9071	226.57	0.0320513	18.1408	25.9935	0.102234	0.85526	2.80058	0.00641717	28.8643	0.399174	7.06684	0.0297961	4.07536	5.31593	3.54623	2.4797	0.187296	0.892192	3.42071	1.08525	0	0	0	0	0	0	0	0
14	6.34401	0.91385	2.59623	0.233032	0.198512	0.0506907	0.33495	0.871315	0.35708	0.268607	2.20388	1.29922	0.0320513	22.41	0.305011	0.713976	6.3288	0.00625412	1.20156	2.10048	0.0193329	0.0444741	4.48251	2.4588	0.647337	1.40375	0.448593	0.0454571	0.00588769	0.0254998	0.0891416	0.00285747	0	0	0	0	0	0	0	0
15	0.00650524	9.23125	3.87625	3.39333	5.6934	6.99074	0.716093	2.20537	63.5579	0.269097	1.94891	4.85087	18.1408	0.305011	118.498	11.7077	7.06173	19.1378	13.9679	0.254446	0.134937	14.1272	7.37916	5.95673	1.24385	4.78214	1.37833	7.40595	0.00261391	2.43338	7.71563	5.66604	0	0	0	0	0	0	0	0
16	6.02496	3.13015	0.47549	2.65841	1.54324	1.78278	12.7622	0.707114	8.57705	1.79137	0.129749	13.6019	25.9935	0.713976	11.7077	32.0225	2.42385	2.97378	2.53216	4.81625	0.541239	6.21201	0.000164037	0.081443	0.0412958	0.0392584	0.0462919	0.233479	0.00824516	0.163038	0.297983	0.308658	0	0	0	0	0	0	0	0
17	3.77711	33.1171	6.30001	0.0285265	0.768051	3.88601	0.0283727	3.36989	1.90239	2.46942	3.50766	20.6686	0.102234	6.3288	7.06173	2.42385	148.792	15.2874	3.2188	8.40433	20.0219	21.9002	42.856	3.29952	0.543865	4.66121	0.113436	1.23789	0.428632	0.108647	7.62056e-06	0.409999	0	0	0	0	0	0	0	0
18	14.5232	12.2096	7.72852	10.6349	6.73647	0.0127721	2.57342	0.273799	22.3549	0.196124	0.0566361	29.6044	0.85526	0.00625412	19.1378	2.97378	15.2874	168.51	31.3198	2.91101	1.61924	13.0163	8.9895	0.995478	0.100729	3.79514	0.605826	2.29888	0.0218606	0.815966	2.56734	1.52864	0	0	0	0	0	0	0	0
19	0.0379536	2.60868	0.159189	5.9174	0.160378	0.0161638	0.292054	0.172384	20.9109	0.0128975	0.0033208	1.56698	2.80058	1.20156	13.9679	2.53216	3.2188	31.3198	49.2598	3.96426	1.58434	5.2551	2.19786	0.154846	0.054197	5.28142	1.176	2.51162	0.00185309	0.923259	3.96243	2.38709	0	0	0	0	0	0	0	0
20	1.70757	0.00619638	8.05754	0.119036	0.409957	2.41238	3.53317	0.090369	0.000896996	0.107883	0.62337	6.60181	0.00641717	2.10048	0.254446	4.81625	8.40433	2.91101	3.96426	43.2895	0.186394	7.3112	0.0514911	3.40889	0.00668788	0.0689632	0.0602859	0.203427	1.00644	0.000485918	0.209132	0.199748	0	0	0	0	0	0	0	0
21	0.343754	4.93095	2.17397	1.51679	11.4271	2.00225	0.0169449	0.0380682	2.80607	10.6392	6.57375	0.390833	28.8643	0.0193329	0.134937	0.541239	20.0219	1.61924	1.58434	0.186394	55.6297	0.608862	1.07998	0.0319147	5.21181	2.08478	0.805232	2.30995	0.297202	0.423678	1.54192	0.300818	0	0	0	0	0	0	0	0
22	0.0089727	1.93946	2.40848	0.981565	6.25267	6.18929	1.10592	0.0239687	1.09499	1.07138	1.02763	6.81072	0.399174	0.0444741	14.1272	6.21201	21.9002	13.0163	5.2551	7.3112	0.608862	74.4487	18.7237	0.911904	0.00841539	0.537811	3.91515	7.97981	0.846164	1.16587	0.760236	2.25637	0	0	0	0	0	0	0	0
23	1.66865	16.8352	0.0201444	0.612285	8.83817	16.498	4.73215	2.15033	0.383859	7.13372	0.176768	3.14509	7.06684	4.48251	7.37916	0.000164037	42.856	8.9895	2.19786	0.0514911	1.07998	18.7237	117.59	0.157954	0.0626244	10.7626	1.8096	7.69677	0.190563	0.126939	2.20095	0.777184	0	0	0	0	0	0	0	0
24	2.84447	0.360686	4.4531	1.04055	1.5862	5.58882	0.482008	0.944601	3.81834	0.000876636	0.259987	2.61597	0.0297961	2.4588	5.95673	0.081443	3.29952	0.995478	0.154846	3.40889	0.0319147	0.911904	0.157954	11.4992	1.68577	0.273537	1.01482	0.509955	0.37397	0.210769	2.10507	0.4723	0	0	0	0	0	0	0	0
25	0.809987	0.353251	0.0303867	0.490725	2.16169	1.57214	0.360022	0.226863	2.75663	1.12023	0.641846	0.00761017	4.07536	0.647337	1.24385	0.0412958	0.543865	0.100729	0.054197	0.00668788	5.21181	0.00841539	0.0626244	1.68577	2.94011	0.341246	0.0561876	0.0740021	0.00361033	0.010521	0.0409024	0.0378797	0	0	0	0	0	0	0	0
26	2.95863	0.298346	2.73894	0.0643237	2.45799	0.942006	6.95304	0.0761662	1.57592	0.125499	0.0416096	0.0016429	5.31593	1.40375	4.78214	0.0392584	4.66121	3.79514	5.28142	0.0689632	2.08478	0.537811	10.7626	0.273537	0.341246	15.1181	3.00683	2.56545	0.0343296	0.501406	2.21665	1.49841	0	0	0	0	0	0	0	0
27	0.0803551	0.892685	2.96412	0.0944783	0.00488272	9.36033	0.0451644	0.74462	3.57949	0.000327726	0.329217	0.281083	3.54623	0.448593	1.37833	0.0462919	0.113436	0.605826	1.176	0.0602859	0.805232	3.91515	1.8096	1.01482	0.0561876	3.00683	10.6435	0.0701671	0.0562069	0.228776	0.788496	0.295056	0	0	0	0	0	0	0	0
28	0.333424	0.456225	0.247726	0.126832	1.80976	0.605064	1.08982	0.00358953	0.918546	0.132616	0.0221122	0.00804572	2.4797	0.0454571	7.40595	0.233479	1.23789	2.29888	2.51162	0.203427	2.30995	7.97981	7.69677	0.509955	0.0740021	2.56545	0.0701671	4.10587	0.0116792	0.560593	1.44306	0.984338	0	0	0	0	0	0	0	0
29	0.00478092	0.016846	1.02113	0.12451	0.235599	0.0061804	0.00147986	0.000166294	0.015714	0.363529	0.0199331	0.00403252	0.187296	0.00588769	0.00261391	0.00824516	0.428632	0.0218606	0.00185309	1.00644	0.297202	0.846164	0.190563	0.37397	0.00361033	0.0343296	0.0562069	0.0116792	0.359908	0.00663022	0.056823	0.0396558	0	0	0	0	0	0	0	0
30	0.0326065	0.000844151	0.0607942	0.142652	0.324984	0.162736	0.0566424	0.0644301	1.0493	0.0177423	0.0114716	0.0215283	0.892192	0.0254998	2.43338	0.163038	0.108647	0.815966	0.923259	0.000485918	0.423678	1.16587	0.126939	0.210769	0.010521	0.501406	0.228776	0.560593	0.00663022	0.23113	0.420262	0.343838	0	0	0	0	0	0	0	0
31	0.564843	0.035322	1.3505	0.238082	0.445692	1.039	0.178327	0.364381	3.99819	0.048577	1.00626e-05	0.000358835	3.42071	0.0891416	7.71563	0.297983	7.62056e-06	2.56734	3.96243	0.209132	1.54192	0.760236	2.20095	2.10507	0.0409024	2.21665	0.788496	1.44306	0.056823	0.420262	2.32068	0.983766	0	0	0	0	0	0	0	0
32	0.371146	0.0180521	0.0183889	0.233213	0.546217	0.619448	0.17396	0.0685927	3.34382	0.091679	0.000716934	0.00848816	1.08525	0.00285747	5.66604	0.308658	0.409999	1.52864	2.38709	0.199748	0.300818	2.25637	0.777184	0.4723	0.0378797	1.49841	0.295056	0.984338	0.0396558	0.343838	0.983766	0.921024	0	0	0	0	0	0	0	0
33-dimensional	220.347	0.71277	8.28993	0.703681	0.846669	7.21968	2.89377	8.95038	0.793355	1.06085	1.3352	0.452847	12.9128	6.34325	0.094257	6.48481	3.91511	14.1085	0.000625986	2.19851	0.705806	0.0217843	1.02407	3.40888	0.923541	3.14531	0.0576032	0.343207	0.102022	0.0358926	0.924049	0.289811	0.0354011	10	0	0	0	0	0	0
2	0.71277	110.478	4.66832	4.06205	0.281451	10.1338	6.01921	3.25928	6.75136	0.0270727	0.506249	6.03335	1.74914	0.91319	15.4236	2.4285	32.1949	11.3471	1.23435	0.232624	2.68477	1.61646	22.5123	0.934953	0.206502	0.1795	0.714281	0.430543	0.579469	0.00244229	0.0858319	0.0881445	0.186163	0	0	0	0	0	0	0
3	8.28993	4.66832	223.732	0.368746	2.44827	5.55712	2.90598	4.00256	3.99103	0.344328	7.0306	16.7642	2.06191	2.59496	8.89225	0.201824	5.84686	6.95261	0.947755	5.6578	0.65787	1.99869	0.347305	6.38961	0.00022048	3.22068	2.5859	0.27009	4.10463	0.0727783	2.92478	0.00246318	0.241802	0	0	0	0	0	0	0
4	0.703681	4.06205	0.368746	141.508	1.43928	2.09138	0.556708	1.49221	7.15039	1.13717	0.505661	0.000636443	27.3267	0.233045	3.51346	2.63347	0.0295261	10.6051	5.82856	0.109125	1.56936	0.97285	0.576319	1.06791	0.497878	0.0666035	0.0922637	0.126333	0.148423	0.142093	0.221324	0.238955	0.000246108	0	0	0	0	0	0	0
5	0.846669	0.281451	2.44827	1.43928	47.7237	0.530852	0.0701141	0.0401623	0.0417233	7.97301	3.68037	5.06499	17.9798	0.198268	2.82907	1.98606	0.884142	7.26312	0.639597	0.92147	8.52294	6.74212	6.07484	0.939506	1.84809	2.77172	0.0221462	1.8511	0.0485409	0.343634	1.09934	0.372509	0.116779	0	0	0	0	0	0	0
6	7.21968	10.1338	5.55712	2.09138	0.530852	199.693	0.99303	2.62548	5.32054	13.0187	0.0170574	11.1928	7.33809	0.0506108	9.61671	2.08404	4.05129	0.0315546	0.149256	3.10005	1.24489	6.50335	13.9269	4.73368	1.39691	0.823678	9.67653	0.62059	0.28809	0.154398	0.59606	0.757975	0.0492137	0	0	0	0	0	0	0
7	2.89377	6.01921	2.90598	0.556708	0.0701141	0.99303	68.6858	0.701816	1.37912	0.59217	4.32726	18.9374	1.8581	0.335039	1.08983	12.4293	0.0226493	2.48451	0.183437	3.20377	5.13246e-07	1.04993	4.13163	0.601791	0.323644	7.09751	0.0362336	1.0988	0.0255065	0.0588189	0.280106	0.145112	0.0092092	0	0	0	0	0	0	0
8	8.95038	3.25928	4.00256	1.49221	0.0401623	2.62548	0.701816	42.0977	0.862768	1.83627	1.25274	0.97167	8.25077	0.871846	4.91688	0.44515	3.13027	0.392877	1.18744e-08	0.00101553	0.0808733	0.064871	3.97995	0.449032	0.130344	0.0306377	0.893064	0.00193814	0.557892	0.0561946	0.0430408	0.156656	0.12634	0	0	0	0	0	0	0
9	0.793355	6.75136	3.99103	7.15039	0.0417233	5.32054	1.37912	0.862768	129.87	1.88895	7.42018	1.20635	4.97422	0.357415	52.5807	9.60806	2.0872	23.3293	24.8177	0.127668	4.61062	1.31047	1.29959	5.06796	3.14638	1.83534	3.28013	0.948776	0.356835	1.08341	5.71027	2.87906	0.122475	0	0	0	0	0	0	0
10	1.06085	0.0270727	0.344328	1.13717	7.97301	13.0187	0.59217	1.83627	1.88895	83.42	12.5677	4.01056	0.723739	0.268861	1.32523	1.41233	2.29232	0.124923	0.0600613	0.00170844	8.10943	0.900266	4.90373	0.0842391	0.919418	0.194862	0.00278809	0.142797	1.52972	0.0140926	0.316439	0.17507	0.0942187	0	0	0	0	0	0	0
11	1.3352	0.506249	7.0306	0.505661	3.68037	0.0170574	4.32726	1.25274	7.42018	12.5677	60.7209	8.69012	0.020672	2.20531	0.0232893	0.00426169	3.94312	0.171213	0.419242	0.0506408	11.4111	0.712577	0.227537	1.04512	0.993739	0.00106236	0.508626	0.0148171	1.2212	0.00618127	0.448198	0.0402236	0.364198	0	0	0	0	0	0	0
12	0.452847	6.03335	16.7642	0.000636443	5.06499	11.1928	18.9374	0.97167	1.20635	4.01056	8.69012	179.63	2.91762	1.2992	4.73208	13.6494	20.691	29.6462	1.60575	6.66526	0.413362	6.83005	3.07601	2.57992	0.00837357	0.00196009	0.277866	0.00815168	0.00822625	0.0217111	1.81824e-05	0.00759865	0.000173439	0	0	0	0	0	0	0
13	12.9128	1.74914	2.06191	27.3267	17.9798	7.33809	1.8581	8.25077	4.97422	0.723739	0.020672	2.91762	227.131	0.0320285	16.7695	26.392	0.111982	0.898721	3.12078	0.0239089	27.7211	0.427962	6.45101	0.0110192	3.97172	5.42077	3.47726	2.49093	0.356757	0.89931	3.75705	1.02363	0.00634639	0	0	0	0	0	0	0
14	6.34325	0.91319	2.59496	0.233045	0.198268	0.0506108	0.335039	0.871846	0.357415	0.268861	2.20531	1.2992	0.0320285	22.41	0.305631	0.713751	6.32906	0.00624159	1.20226	2.10121	0.0194352	0.0444418	4.48079	2.45807	0.647195	1.40393	0.448508	0.045452	0.00580173	0.0254957	0.0889605	0.00286844	7.41146e-08	0	0	0	0	0	0	0
15	0.094257	15.4236	8.89225	3.51346	2.82907	9.61671	1.08983	4.91688	52.5807	1.32523	0.0232893	4.73208	16.7695	0.305631	152.038	9.48026	6.38207	17.3925	8.51551	1.34626	1.72448	12.6849	14.1312	3.4051	0.788358	3.95088	1.78486	7.23634	2.24724	2.33122	3.9848	6.99321	0.491617	0	0	0	0	0	0	0
16	6.48481	2.4285	0.201824	2.63347	1.98606	2.08404	12.4293	0.44515	9.60806	1.41233	0.00426169	13.6494	26.392	0.713751	9.48026	32.9489	2.52166	3.14321	3.18832	5.52324	0.261474	6.44714	0.067662	0.0207858	0.0661242	0.0227728	0.0312368	0.240719	0.0638233	0.169439	0.534714	0.242973	0.0276572	0	0	0	0	0	0	0
17	3.91511	32.1949	5.84686	0.0295261	0.884142	4.05129	0.0226493	3.13027	2.0872	2.29232	3.94312	20.691	0.111982	6.32906	6.38207	2.52166	149.082	15.4327	3.49112	8.753	20.7976	22.0679	41.626	3.10614	0.57473	4.73958	0.123554	1.24423	0.273828	0.110636	0.00543012	0.379875	0.00404955	0	0	0	0	0	0	0
18	14.1085	11.3471	6.95261	10.6051	7.26312	0.0315546	2.48451	0.392877	23.3293	0.124923	0.171213	29.6462	0.898721	0.00624159	17.3925	3.14321	15.4327	169.261	32.6296	3.23602	1.2968	13.2181	8.12726	0.834602	0.0813564	3.90562	0.570703	2.31234	0.00323294	0.824441	2.93363	1.4377	0.00982664	0	0	0	0	0	0	0
19	0.000625986	1.23435	0.947755	5.82856	0.639597	0.149256	0.183437	1.18744e-08	24.8177	0.0600613	0.419242	1.60575	3.12078	1.20226	8.51551	3.18832	3.49112	32.6296	55.9968	5.5836	0.521767	5.77984	0.794305	0.534526	0.0107866	5.81318	0.98523	2.56827	0.746746	0.959676	5.92318	1.9467	0.158091	0	0	0	0	0	0	0
20	2.19851	0.232624	5.6578	0.109125	0.92147	3.10005	3.20377	0.00101553	0.127668	0.00170844	0.0506408	6.66526	0.0239089	2.10121	1.34626	5.52324	8.753	3.23602	5.5836	47.2962	5.40129e-06	7.80291	0.490399	2.48389	0.0342285	0.124616	0.0295842	0.190795	0.119618	0.00137404	0.0105091	0.106944	0.101325	0	0	0	0	0	0	0
21	0.705806	2.68477	0.65787	1.56936	8.52294	1.24489	5.13246e-07	0.0808733	4.61062	8.10943	11.4111	0.413362	27.7211	0.0194352	1.72448	0.261474	20.7976	1.2968	0.521767	5.40129e-06	65.251	0.424191	2.96492	0.0445822	5.91372	1.72529	1.00679	2.24799	0.16229	0.39594	0.532997	0.520415	0.21074	0	0	0	0	0	0	0
22	0.0217843	1.61646	1.99869	0.97285	6.74212	6.50335	1.04993	0.064871	1.31047	0.900266	0.712577	6.83005	0.427962	0.0444418	12.6849	6.44714	22.0679	13.2181	5.77984	7.80291	0.424191	74.9131	17.5132	0.763425	0.0150667	0.578381	4.00305	8.00398	0.521859	1.17564	0.957458	2.14945	0.00914401	0	0	0	0	0	0	0
23	1.02407	22.5123	0.347305	0.576319	6.07484	13.9269	4.13163	3.97995	1.29959	4.90373	0.227537	3.07601	6.45101	4.48079	14.1312	0.067662	41.626	8.12726	0.794305	0.490399	2.96492	17.5132	134.478	0.684143	0.171697	9.84026	1.50875	7.57177	0.370309	0.110489	0.845491	1.14964	0.256097	0	0	0	0	0	0	0
24	3.40888	0.934953	6.38961	1.06791	0.939506	4.73368	0.601791	0.449032	5.06796	0.0842391	1.04512	2.57992	0.0110192	2.45807	3.4051	0.0207858	3.10614	0.834602	0.534526	2.48389	0.0445822	0.763425	0.684143	13.2233	1.93789	0.366108	0.884799	0.528569	1.45984	0.223477	3.14335	0.33454	0.0834914	0	0	0	0	0	0	0
25	0.923541	0.206502	0.00022048	0.497878	1.84809	1.39691	0.323644	0.130344	3.14638	0.919418	0.993739	0.00837357	3.97172	0.647195	0.788358	0.0661242	0.57473	0.0813564	0.0107866	0.0342285	5.91372	0.0150667	0.171697	1.93789	3.06413	0.305611	0.0689232	0.0713425	0.0281625	0.00947954	0.105787	0.0234258	0.0121792	0	0	0	0	0	0	0
26	3.14531	0.1795	3.22068	0.0666035	2.77172	0.823678	7.09751	0.0306377	1.83534	0.194862	0.00106236	0.00196009	5.42077	1.40393	3.95088	0.0227728	4.73958	3.90562	5.81318	0.124616	1.72529	0.578381	9.84026	0.366108	0.305611	15.3323	2.9299	2.57931	0.148121	0.507887	2.54901	1.41061	0.00934029	0	0	0	0	0	0	0
27	0.0576032	0.714281	2.5859	0.0922637	0.0221462	9.67653	0.0362336	0.893064	3.28013	0.00278809	0.508626	0.277866	3.47726	0.448508	1.78486	0.0312368	0.123554	0.570703	0.98523	0.0295842	1.00679	4.00305	1.50875	0.884799	0.0689232	2.9299	10.7624	0.072041	0.00558664	0.22524	0.640568	0.328103	0.00617942	0	0	0	0	0	0	0
28	0.343207	0.430543	0.27009	0.126333	1.8511	0.62059	1.0988	0.00193814	0.948776	0.142797	0.0148171	0.00815168	2.49093	0.045452	7.23634	0.240719	1.24423	2.31234	2.56827	0.190795	2.24799	8.00398	7.57177	0.528569	0.0713425	2.57931	0.072041	4.10863	0.0194556	0.561669	1.48408	0.973	0.000231387	0	0	0	0	0	0	0
29	0.102022	0.579469	4.10463	0.148423	0.0485409	0.28809	0.0255065	0.557892	0.356835	1.52972	1.2212	0.00822625	0.356757	0.00580173	2.24724	0.0638233	0.273828	0.00323294	0.746746	0.119618	0.16229	0.521859	0.370309	1.45984	0.0281625	0.148121	0.00558664	0.0194556	4.20734	0.00232866	1.0438	0.215171	0.493863	0	0	0	0	0	0	0
30	0.0358926	0.00244229	0.0727783	0.142093	0.343634	0.154398	0.0588189	0.0561946	1.08341	0.0140926	0.00618127	0.0217111	0.89931	0.0254957	2.33122	0.169439	0.110636	0.824441	0.959676	0.00137404	0.39594	1.17564	0.110489	0.223477	0.00947954	0.507887	0.22524	0.561669	0.00232866	0.231859	0.443795	0.336778	0.000257993	0	0	0	0	0	0	0
31	0.924049	0.0858319	2.92478	0.221324	1.09934	0.59606	0.280106	0.0430408	5.71027	0.316439	0.448198	1.81824e-05	3.75705	0.0889605	3.9848	0.534714	0.00543012	2.93363	5.92318	0.0105091	0.532997	0.957458	0.845491	3.14335	0.105787	2.54901	0.640568	1.48408	1.0438	0.443795	3.78747	0.720747	0.143867	0	0	0	0	0	0	0
32	0.289811	0.0881445	0.00246318	0.238955	0.372509	0.757975	0.145112	0.156656	2.87906	0.17507	0.0402236	0.00759865	1.02363	0.00286844	6.99321	0.242973	0.379875	1.4377	1.9467	0.106944	0.520415	2.14945	1.14964	0.33454	0.0234258	1.41061	0.328103	0.973	0.215171	0.336778	0.720747	1.01604	0.0164329	0	0	0	0	0	0	0
33	0.0354011	0.186163	0.241802	0.000246108	0.116779	0.0492137	0.0092092	0.12634	0.122475	0.0942187	0.364198	0.000173439	0.00634639	7.41146e-08	0.491617	0.0276572	0.00404955	0.00982664	0.158091	0.101325	0.21074	0.00914401	0.256097	0.0834914	0.0121792	0.00934029	0.00617942	0.000231387	0.493863	0.000257993	0.143867	0.0164329	0.115804	0	0	0	0	0	0	0
34-dimensional	229.594	1.19498	7.31838	0.226983	0.000390332	6.27837	3.82923	7.61328	0.70787	0.313082	3.57502	0.0961264	15.3473	5.13664	0.934869	6.71636	2.94467	16.9397	0.199802	6.33901	0.0250559	0.00194762	1.2162	2.03697	0.614491	1.45804	0.131161	0.111507	0.0705401	0.322264	6.02428	0.368681	0.159262	0.180403	0	0	0	0	0	0
2	1.19498	114.743	5.29503	2.96815	0.0521411	9.22336	5.0487	2.61672	6.96003	0.296332	0.0138934	7.55856	2.50982	1.34376	11.5228	2.54322	29.8334	9.47501	0.532782	0.124845	1.1838	1.24681	23.2137	1.7038	0.0969849	0.00110962	0.5573	0.204998	0.647506	0.0655141	0.83282	0.124242	0.0682091	0.117599	0	0	0	0	0	0
3	7.31838	5.29503	226.679	0.162176	1.06971	5.08526	2.43476	4.54479	4.10309	0.726388	5.00232	18.4832	1.57006	3.0737	6.80997	0.225321	5.15199	5.9234	1.53736	8.77764	0.181736	1.70446	0.410365	7.64123	0.00724294	4.4692	2.36894	0.438067	4.22861	0.00317234	0.752626	0.00782967	0.138905	0.0574551	0	0	0	0	0	0
4	0.226983	2.96815	0.162176	151.827	0.00896529	2.75322	0.198443	0.899113	7.46407	0.263479	2.48228	0.161136	31.4559	0.034701	1.20699	2.80823	0.231005	8.02984	3.45704	2.3937	4.22035	0.579006	0.425555	2.329	0.835093	0.852874	0.0256435	0.00351267	0.201175	0.675067	4.95472	0.324644	0.0539586	0.249352	0	0	0	0	0	0
5	0.000390332	0.0521411	1.06971	0.00896529	95.5294	1.64172	1.09099	0.826794	0.125841	18.1304	0.104541	1.309	10.5759	1.47406	13.6447	1.61768	3.03146	14.3763	5.01254	4.82109	0.706545	10.1195	4.78613	0.0951628	0.671473	11.4958	0.271707	4.53097	0.14776	0.321472	12.2783	0.160334	0.0908192	1.677	0	0	0	0	0	0
6	6.27837	9.22336	5.08526	2.75322	1.64172	202.717	0.71593	3.08724	5.45527	15.0915	0.316934	9.81043	6.34182	0.139318	7.36064	2.00823	4.6969	0.151427	0.440761	1.32727	0.510939	7.09109	13.531	3.72205	1.16156	0.330317	10.1286	0.875927	0.323062	0.378655	2.7228	0.830111	0.00956662	0.0623817	0	0	0	0	0	0
7	3.82923	5.0487	2.43476	0.198443	1.09099	0.71593	72.2473	0.415856	1.28464	0.143841	2.16165	16.4079	1.19737	0.620968	2.53242	12.1671	0.135711	3.51413	0.672171	0.867329	0.320743	1.40117	4.4437	0.18326	0.512408	4.81616	0.0850812	0.704353	0.0132399	0.309462	3.12559	0.191889	0.0734091	0.12415	0	0	0	0	0	0
8	7.61328	2.61672	4.54479	0.899113	0.826794	3.08724	0.415856	44.4039	0.795004	2.92375	0.318909	1.58616	6.9062	1.26318	7.37167	0.400952	3.87048	0.126406	0.126653	0.660104	0.0528342	0.0121214	3.71125	0.972544	0.244641	0.362307	0.727424	0.054764	0.498909	0.00232396	0.843986	0.118247	0.264734	0.102617	0	0	0	0	0	0
9	0.70787	6.96003	4.10309	7.46407	0.125841	5.45527	1.28464	0.795004	130.05	2.10165	6.79273	1.33735	5.20838	0.407316	51.0597	9.65284	1.96746	22.7763	24.0705	0.273539	4.15375	1.24113	1.26664	4.77037	3.04659	1.59802	3.35135	0.871834	0.346616	1.21314	6.90992	2.91659	0.147251	0.00462403	0	0	0	0	0	0
10	0.313082	0.296332	0.726388	0.263479	18.1304	15.0915	0.143841	2.92375	2.10165	97.0494	5.87117	2.09915	0.126816	0.0178761	0.0207919	1.58051	1.23924	0.0381906	0.931964	2.62695	3.26598	0.430652	4.30892	0.864503	0.474139	1.70349	0.057224	0.581122	1.7396	0.484284	2.94501	0.274033	0.000222887	0.420121	0	0	0	0	0	0
11	3.57502	0.0138934	5.00232	2.48228	0.104541	0.316934	2.16165	0.318909	6.79273	5.87117	91.1268	14.5423	0.840574	0.780726	2.98069	0.0298478	6.82355	1.61702	3.14452	7.25554	25.0427	0.149658	0.481217	4.08799	2.01442	1.7355	1.00908	0.229545	1.52135	0.961837	8.36289	0.133059	0.0100827	1.02625	0	0	0	0	0	0
12	0.0961264	7.55856	18.4832	0.161136	1.309	9.81043	16.4079	1.58616	1.33735	2.09915	14.5423	191.263	4.36664	0.710611	1.95592	14.0442	17.9737	25.2148	0.506283	14.4408	0.0255072	5.70129	3.4626	4.40815	0.0136868	0.386909	0.450145	0.0425433	0.000747985	0.351166	3.07465	0.0282978	0.068365	0.249995	0	0	0	0	0	0
13	15.3473	2.50982	1.57006	31.4559	10.5759	6.34182	1.19737	6.9062	5.20838	0.126816	0.840574	4.36664	237.519	0.00742374	11.5687	26.8811	0.00342003	0.324736	1.61367	1.5446	35.7838	0.204854	6.94535	0.297679	4.74863	3.00385	3.97274	1.72504	0.292369	1.81168	12.3076	1.17534	0.0908594	0.199421	0	0	0	0	0	0
14	5.13664	1.34376	3.0737	0.034701	1.47406	0.139318	0.620968	1.26318	0.407316	0.0178761	0.780726	0.710611	0.00742374	24.4055	1.1938	0.652824	5.29418	0.139286	0.504631	5.27245	0.174995	0.135162	4.80094	3.65053	0.901292	0.52112	0.59233	0.175777	0.0144454	0.0224148	0.852186	7.62359e-06	0.0298625	0.12071	0	0	0	0	0	0
15	0.934869	11.5228	6.80997	1.20699	13.6447	7.36064	2.53242	7.37167	51.0597	0.0207919	2.98069	1.95592	11.5687	1.1938	188.866	8.89555	9.53886	24.4067	15.433	11.3956	0.0214011	15.7767	12.7069	7.52057	1.60533	10.2351	1.15457	10.4282	1.91515	0.514406	1.43995	6.23547	1.32859	0.826584	0	0	0	0	0	0
16	6.71636	2.54322	0.225321	2.80823	1.61768	2.00823	12.1671	0.400952	9.65284	1.58051	0.0298478	14.0442	26.8811	0.652824	8.89555	33.0246	2.40119	2.95954	2.94667	6.25729	0.373342	6.30559	0.0609291	0.0422043	0.0534788	0.0545911	0.0378677	0.205939	0.0599104	0.218015	0.901584	0.252997	0.0388635	0.00385513	0	0	0	0	0	0
17	2.94467	29.8334	5.15199	0.231005	3.03146	4.6969	0.135711	3.87048	1.96746	1.23924	6.82355	17.9737	0.00342003	5.29418	9.53886	2.40119	154.597	17.9344	5.15571	4.31268	26.4337	23.6293	40.6331	1.97501	0.826311	7.07192	0.207555	1.76913	0.227943	0.000107306	1.43647	0.311005	0.0134739	0.130963	0	0	0	0	0	0
18	16.9397	9.47501	5.9234	8.02984	14.3763	0.151427	3.51413	0.126406	22.7763	0.0381906	1.61702	25.2148	0.324736	0.139286	24.4067	2.95954	17.9344	180.356	39.2244	0.349688	0.117832	14.8946	7.53413	0.180293	0.00617595	6.95182	0.375683	3.29258	0.0143149	0.217811	0.000859303	1.25151	0.0215971	0.245567	0	0	0	0	0	0
19	0.199802	0.532782	1.53736	3.45704	5.01254	0.440761	0.672171	0.126653	24.0705	0.931964	3.14452	0.506283	1.61367	0.504631	15.433	2.94667	5.15571	39.2244	67.3354	0.605648	0.103455	7.27753	0.565702	1.88457	0.0279993	10.7432	0.648914	3.95331	0.895942	0.160408	0.0217601	1.66365	0.00557281	0.422933	0	0	0	0	0	0
20	6.33901	0.124845	8.77764	2.3937	4.82109	1.32727	0.867329	0.660104	0.273539	2.62695	7.25554	14.4408	1.5446	5.27245	11.3956	6.25729	4.31268	0.349688	0.605648	107.167	5.251	4.62106	0.156231	8.89879	0.167804	2.39413	0.338867	1.64499	0.277239	1.70808	24.1144	0.311564	1.05365	2.03352	0	0	0	0	0	0
21	0.0250559	1.1838	0.181736	4.22035	0.706545	0.510939	0.320743	0.0528342	4.15375	3.26598	25.0427	0.0255072	35.7838	0.174995	0.0214011	0.373342	26.4337	0.117832	0.103455	5.251	91.8888	0.05164	3.6973	1.29521	7.97245	0.0037983	1.62198	0.887666	0.272355	2.14855	16.2619	0.763314	5.5533e-05	0.882513	0	0	0	0	0	0
22	0.00194762	1.24681	1.70446	0.579006	10.1195	7.09109	1.40117	0.0121214	1.24113	0.430652	0.149658	5.70129	0.204854	0.135162	15.7767	6.30559	23.6293	14.8946	7.27753	4.62106	0.05164	76.9915	17.0435	0.375887	0.0542428	1.23773	4.31283	8.91502	0.474623	0.720861	0.00248464	2.02573	0.00126431	0.0697801	0	0	0	0	0	0
23	1.2162	23.2137	0.410365	0.425555	4.78613	13.531	4.4437	3.71125	1.26664	4.30892	0.481217	3.4626	6.94535	4.80094	12.7069	0.0609291	40.6331	7.53413	0.565702	0.156231	3.6973	17.0435	135.1	0.903714	0.21768	8.82156	1.42161	7.16871	0.389862	0.197018	1.84839	1.19357	0.197046	0.0156686	0	0	0	0	0	0
24	2.03697	1.7038	7.64123	2.329	0.0951628	3.72205	0.18326	0.972544	4.77037	0.864503	4.08799	4.40815	0.297679	3.65053	7.52057	0.0422043	1.97501	0.180293	1.88457	8.89879	1.29521	0.375887	0.903714	17.6915	2.66624	1.88934	0.599963	1.14382	1.64198	0.00171857	0.0660282	0.235026	4.85553e-06	0.33341	0	0	0	0	0	0
25	0.614491	0.0969849	0.00724294	0.835093	0.671473	1.16156	0.512408	0.244641	3.04659	0.474139	2.01442	0.0136868	4.74863	0.901292	1.60533	0.0534788	0.826311	0.00617595	0.0279993	0.167804	7.97245	0.0542428	0.21768	2.66624	3.43074	0.0518147	0.110699	0.0149737	0.0394957	0.0990173	0.283697	0.0128818	0.000117185	0.0595499	0	0	0	0	0	0
26	1.45804	0.00110962	4.4692	0.852874	11.4958	0.330317	4.81616	0.362307	1.59802	1.70349	1.7355	0.386909	3.00385	0.52112	10.2351	0.0545911	7.07192	6.95182	10.7432	2.39413	0.0037983	1.23773	8.82156	1.88934	0.0518147	24.5507	2.2124	4.27887	0.233936	0.000331846	1.31093	1.12631	0.0844612	0.608147	0	0	0	0	0	0
27	0.131161	0.5573	2.36894	0.0256435	0.271707	10.1286	0.0850812	0.727424	3.35135	0.057224	1.00908	0.450145	3.97274	0.59233	1.15457	0.0378677	0.207555	0.375683	0.648914	0.338867	1.62198	4.31283	1.42161	0.599963	0.110699	2.2124	11.0823	0.13559	0.00285367	0.389962	1.93774	0.360101	2.47032e-05	0.0283261	0	0	0	0	0	0
28	0.111507	0.204998	0.438067	0.00351267	4.53097	0.875927	0.704353	0.054764	0.871834	0.581122	0.229545	0.0425433	1.72504	0.175777	10.4282	0.205939	1.76913	3.29258	3.95331	1.64499	0.887666	8.91502	7.16871	1.14382	0.0149737	4.27887	0.13559	4.98553	0.0336571	0.193925	3.75653e-06	0.865171	0.024696	0.120466	0	0	0	0	0	0
29	0.0705401	0.647506	4.22861	0.201175	0.14776	0.323062	0.0132399	0.498909	0.346616	1.7396	1.52135	0.000747985	0.292369	0.0144454	1.91515	0.0599104	0.227943	0.0143149	0.895942	0.277239	0.272355	0.474623	0.389862	1.64198	0.0394957	0.233936	0.00285367	0.0336571	4.24596	0.0130604	0.579134	0.226465	0.443467	0.00549746	0	0	0	0	0	0
30	0.322264	0.0655141	0.00317234	0.675067	0.321472	0.378655	0.309462	0.00232396	1.21314	0.484284	0.961837	0.351166	1.81168	0.0224148	0.514406	0.218015	0.000107306	0.217811	0.160408	1.70808	2.14855	0.720861	0.197018	0.00171857	0.0990173	0.000331846	0.389962	0.193925	0.0130604	0.894113	6.2409	0.441959	0.0755429	0.271567	0	0	0	0	0	0
31	6.02428	0.83282	0.752626	4.95472	12.2783	2.7228	3.12559	0.843986	6.90992	2.94501	8.36289	3.07465	12.3076	0.852186	1.43995	0.901584	1.43647	0.000859303	0.0217601	24.1144	16.2619	0.00248464	1.84839	0.0660282	0.283697	1.31093	1.93774	3.75653e-06	0.579134	6.2409	84.2445	1.39819	1.96263	4.23236	0	0	0	0	0	0
32	0.368681	0.124242	0.00782967	0.324644	0.160334	0.830111	0.191889	0.118247	2.91659	0.274033	0.133059	0.0282978	1.17534	7.62359e-06	6.23547	0.252997	0.311005	1.25151	1.66365	0.311564	0.763314	2.02573	1.19357	0.235026	0.0128818	1.12631	0.360101	0.865171	0.226465	0.441959	1.39819	1.04728	0.00657447	0.00899859	0	0	0	0	0	0
33	0.159262	0.0682091	0.138905	0.0539586	0.0908192	0.00956662	0.0734091	0.264734	0.147251	0.000222887	0.0100827	0.068365	0.0908594	0.0298625	1.32859	0.0388635	0.0134739	0.0215971	0.00557281	1.05365	5.5533e-05	0.00126431	0.197046	4.85553e-06	0.000117185	0.0844612	2.47032e-05	0.024696	0.443467	0.0755429	1.96263	0.00657447	0.234854	0.0844544	0	0	0	0	0	0
34	0.180403	0.117599	0.0574551	0.249352	1.677	0.0623817	0.12415	0.102617	0.00462403	0.420121	1.02625	0.249995	0.199421	0.12071	0.826584	0.00385513	0.130963	0.245567	0.422933	2.03352	0.882513	0.0697801	0.0156686	0.33341	0.0595499	0.608147	0.0283261	0.120466	0.00549746	0.271567	4.23236	0.00899859	0.0844544	0.342459	0	0	0	0	0	0
35-dimensional	244.279	0.319962	5.94928	0.0180972	0.0987294	5.31564	4.64226	7.09969	0.895672	0.680874	3.029	0.0357085	18.9155	8.06164	0.188832	3.62441	2.44825	23.0102	0.303488	7.12979	0.00466991	0.0131262	0.338621	2.57385	0.57558	2.85943	0.00789196	0.102447	0.0683189	0.413489	4.67793	0.410265	0.315616	0.0361009	0.106764	0	0	0	0	0
2	0.319962	127.579	4.02729	5.75231	0.357164	10.6163	6.07914	2.96644	7.58642	0.702356	0.00234268	4.82902	1.22536	3.21369	7.87298	5.5474	31.6892	14.6788	0.71371	0.0341461	1.41014	0.885708	29.0958	2.25337	0.115136	0.322545	0.197399	0.219105	0.640027	0.0298048	1.52527	0.0996204	0.194567	0.362991	0.13054	0	0	0	0	0
3	5.94928	4.02729	231.171	0.00382834	1.48982	4.59425	2.10265	4.77282	3.86911	0.495763	5.3846	20.9543	1.02459	2.0552	8.44816	0.00827546	4.7759	4.21822	1.68447	9.28874	0.141468	1.94347	0.122499	7.10478	0.00983625	3.40152	2.86157	0.448358	4.23829	0.000204164	1.06134	0.0114658	0.0794798	0.0118253	0.0332279	0	0	0	0	0
4	0.0180972	5.75231	0.00382834	171.721	0.272896	3.66932	0.0369472	0.683839	6.74706	0.72841	1.91255	1.08262	37.9621	0.846345	3.16978	0.631894	0.454842	3.84715	2.97991	3.03586	4.70696	0.929626	1.74097	1.68818	0.89518	0.0926075	0.260282	0.00172433	0.206046	0.842948	3.4317	0.375105	0.194202	0.0394931	0.17511	0	0	0	0	0
5	0.0987294	0.357164	1.48982	0.272896	100.154	1.30237	0.820957	0.710635	0.183426	19.7485	0.183695	2.23041	12.6325	2.60877	16.5369	0.624682	2.6738	10.9879	4.69211	4.36387	0.816377	10.8387	3.32353	0.187026	0.700726	13.9056	0.5078	4.48978	0.1455	0.264439	13.7506	0.179564	0.0351363	2.12962	0.0523247	0	0	0	0	0
6	5.31564	10.6163	4.59425	3.66932	1.30237	205.115	0.582444	3.22839	5.25138	14.2383	0.249896	8.54305	5.46272	0.0176769	8.62209	2.90915	4.97604	0.455392	0.500531	1.18404	0.458422	6.74099	15.1861	4.01419	1.13886	0.604558	9.41199	0.886838	0.325075	0.41855	2.33412	0.85578	0.000873536	0.0228926	0.0187841	0	0	0	0	0
7	4.64226	6.07914	2.10265	0.0369472	0.820957	0.582444	73.6475	0.366772	1.38524	0.239479	2.34882	14.7749	0.837817	0.303096	1.8788	14.2374	0.185859	4.65237	0.744651	0.753633	0.364369	1.24976	3.57999	0.251502	0.527487	5.73598	0.0318223	0.694747	0.0128409	0.345187	2.71282	0.204184	0.114509	0.0650485	0.018345	0	0	0	0	0
8	7.09969	2.96644	4.77282	0.683839	0.710635	3.22839	0.366772	44.6548	0.832622	2.74623	0.353511	1.84547	6.46323	1.0205	6.80905	0.592487	3.98957	0.0485503	0.141758	0.710184	0.0613613	0.0200501	4.12031	0.904447	0.249619	0.255986	0.822911	0.0560586	0.497727	0.00398963	0.740991	0.113741	0.299015	0.0749363	0.00420646	0	0	0	0	0
9	0.895672	7.58642	3.86911	6.74706	0.183426	5.25138	1.38524	0.832622	130.578	2.27466	6.62122	1.09528	4.78358	0.584256	49.3982	10.6169	2.06205	24.2304	24.2956	0.239556	4.23489	1.16449	1.02161	4.60153	3.06601	1.34018	3.57534	0.87754	0.347709	1.17686	7.25161	2.89158	0.121035	0.0143258	0.00517705	0	0	0	0	0
10	0.680874	0.702356	0.495763	0.72841	19.7485	14.2383	0.239479	2.74623	2.27466	99.9851	5.47245	2.98144	0.355738	0.0343254	0.0231653	2.69006	1.43392	0.0337835	0.82361	2.35905	3.44951	0.322486	3.18896	1.05759	0.493678	2.47866	0.153192	0.569421	1.73342	0.427655	3.5286	0.254949	0.00572599	0.606629	0.0330974	0	0	0	0	0
11	3.029	0.00234268	5.3846	1.91255	0.183695	0.249896	2.34882	0.353511	6.62122	5.47245	92.034	13.3674	0.609609	0.494223	3.58823	0.151761	6.57664	1.11711	3.02944	6.99901	24.7597	0.113456	0.735973	4.31684	1.99191	2.16026	1.18959	0.225379	1.51808	0.915816	8.90292	0.125505	0.0230138	1.18163	0.0106075	0	0	0	0	0
12	0.0357085	4.82902	20.9543	1.08262	2.23041	8.54305	14.7749	1.84547	1.09528	2.98144	13.3674	205.973	6.45746	2.08004	3.82352	9.16936	16.6566	18.5673	0.363425	15.678	0.0644163	6.52161	1.73167	3.66458	0.0205569	0.0135205	0.148243	0.0487315	0.000526256	0.450789	2.09803	0.0412422	0.186345	0.0647473	0.116819	0	0	0	0	0
13	18.9155	1.22536	1.02459	37.9621	12.6325	5.46272	0.837817	6.46323	4.78358	0.355738	0.609609	6.45746	249.709	0.186783	15.0772	20.8153	0.00615123	0.00215339	1.38366	1.90642	36.7642	0.355454	4.68331	0.148504	4.84862	4.71159	3.04806	1.69227	0.28826	1.99985	10.526	1.24164	0.201294	0.0548396	0.0874029	0	0	0	0	0
14	8.06164	3.21369	2.0552	0.846345	2.60877	0.0176769	0.303096	1.0205	0.584256	0.0343254	0.494223	2.08004	0.186783	31.6763	2.99945	0.000324099	6.16342	0.197779	0.697481	4.46533	0.096286	0.311617	7.93352	4.50845	0.844692	0.0199569	1.2053	0.162103	0.0132542	0.0035083	1.62131	0.0013885	0.000510846	0.39605	0.153969	0	0	0	0	0
15	0.188832	7.87298	8.44816	3.16978	16.5369	8.62209	1.8788	6.80905	49.3982	0.0231653	3.58823	3.82352	15.0772	2.99945	205.546	4.90634	8.52436	17.4747	14.5355	10.2762	0.00210797	17.2149	8.90072	8.64352	1.5348	13.9783	0.592147	10.3286	1.92819	0.642084	2.32673	6.42259	0.942973	1.37149	0.132944	0	0	0	0	0
16	3.62441	5.5474	0.00827546	0.631894	0.624682	2.90915	14.2374	0.592487	10.6169	2.69006	0.151761	9.16936	20.8153	0.000324099	4.90634	45.4056	3.12491	7.30263	3.48344	5.20611	0.231673	5.20881	0.254205	0.212311	0.0716224	0.866263	0.346533	0.224467	0.0629223	0.128368	1.8767	0.206967	0.00140392	0.160422	0.221934	0	0	0	0	0
17	2.44825	31.6892	4.7759	0.454842	2.6738	4.97604	0.185859	3.98957	2.06205	1.43392	6.57664	16.6566	0.00615123	6.16342	8.52436	3.12491	155.793	19.8109	5.30647	4.1142	26.7279	23.1425	42.7669	2.13605	0.840922	6.27978	0.136077	1.78083	0.226669	0.000183357	1.22332	0.299326	0.0281202	0.0826168	0.0107416	0	0	0	0	0
18	23.0102	14.6788	4.21822	3.84715	10.9879	0.455392	4.65237	0.0485503	24.2304	0.0337835	1.11711	18.5673	0.00215339	0.197779	17.4747	7.30263	19.8109	207.42	41.1046	0.139664	0.0461547	13.197	12.17	0.458949	0.00181242	3.78821	1.00634	3.36475	0.0157911	0.128971	0.149769	1.14731	0.143855	0.02573	0.217633	0	0	0	0	0
19	0.303488	0.71371	1.68447	2.97991	4.69211	0.500531	0.744651	0.141758	24.2956	0.82361	3.02944	0.363425	1.38366	0.697481	14.5355	3.48344	5.30647	41.1046	67.7073	0.555076	0.116443	7.09222	0.749244	1.78015	0.0298682	10.064	0.74837	3.96532	0.89768	0.147531	0.0445311	1.64497	0.00153738	0.359047	0.00506494	0	0	0	0	0
20	7.12979	0.0341461	9.28874	3.03586	4.36387	1.18404	0.753633	0.710184	0.239556	2.35905	6.99901	15.678	1.90642	4.46533	10.2762	5.20611	4.1142	0.139664	0.555076	108.178	5.38355	4.84165	0.315506	8.56439	0.174472	1.93993	0.244817	1.65636	0.278659	1.77159	23.2081	0.323566	1.16309	1.82523	0.0108999	0	0	0	0	0
21	0.00466991	1.41014	0.141468	4.70696	0.816377	0.458422	0.364369	0.0613613	4.23489	3.44951	24.7597	0.0644163	36.7642	0.096286	0.00210797	0.231673	26.7279	0.0461547	0.116443	5.38355	92.2143	0.0661361	3.32922	1.22031	7.99933	0.0233472	1.49336	0.88275	0.273185	2.1904	15.8215	0.774335	0.00145427	0.80131	0.00379606	0	0	0	0	0
22	0.0131262	0.885708	1.94347	0.929626	10.8387	6.74099	1.24976	0.0200501	1.16449	0.322486	0.113456	6.52161	0.355454	0.311617	17.2149	5.20881	23.1425	13.197	7.09222	4.84165	0.0661361	77.9207	15.6427	0.307116	0.0504044	1.62148	4.69876	8.88752	0.476557	0.764053	0.00222382	2.05741	0.000345039	0.117134	0.0118156	0	0	0	0	0
23	0.338621	29.0958	0.122499	1.74097	3.32353	15.1861	3.57999	4.12031	1.02161	3.18896	0.735973	1.73167	4.68331	7.93352	8.90072	0.254205	42.7669	12.17	0.749244	0.315506	3.32922	15.6427	148.646	1.30877	0.192737	5.96425	0.798994	7.24994	0.384136	0.13075	2.81551	1.11537	0.386357	0.145532	0.127293	0	0	0	0	0
24	2.57385	2.25337	7.10478	1.68818	0.187026	4.01419	0.251502	0.904447	4.60153	1.05759	4.31684	3.66458	0.148504	4.50845	8.64352	0.212311	2.13605	0.458949	1.78015	8.56439	1.22031	0.307116	1.30877	18.2489	2.63575	2.41498	0.453071	1.13284	1.63797	0.000181817	0.133376	0.247175	0.0039201	0.441638	0.0147136	0	0	0	0	0
25	0.57558	0.115136	0.00983625	0.89518	0.700726	1.13886	0.527487	0.249619	3.06601	0.493678	1.99191	0.0205569	4.84862	0.844692	1.5348	0.0716224	0.840922	0.00181242	0.0298682	0.174472	7.99933	0.0504044	0.192737	2.63575	3.43568	0.064107	0.101291	0.0147949	0.0395844	0.101541	0.26751	0.0124848	0.000377499	0.0536461	0.000298507	0	0	0	0	0
26	2.85943	0.322545	3.40152	0.0926075	13.9056	0.604558	5.73598	0.255986	1.34018	2.47866	2.16026	0.0135205	4.71159	0.0199569	13.9783	0.866263	6.27978	3.78821	10.064	1.93993	0.0233472	1.62148	5.96425	2.41498	0.064107	29.6467	1.46507	4.22098	0.229822	0.00894564	2.07499	1.19915	0.015802	1.0358	0.109665	0	0	0	0	0
27	0.00789196	0.197399	2.86157	0.260282	0.5078	9.41199	0.0318223	0.822911	3.57534	0.153192	1.18959	0.148243	3.04806	1.2053	0.592147	0.346533	0.136077	1.00634	0.74837	0.244817	1.49336	4.69876	0.798994	0.453071	0.101291	1.46507	12.1495	0.129807	0.00311752	0.337908	2.43076	0.337548	0.00778978	0.0916844	0.0350471	0	0	0	0	0
28	0.102447	0.219105	0.448358	0.00172433	4.48978	0.886838	0.694747	0.0560586	0.87754	0.569421	0.225379	0.0487315	1.69227	0.162103	10.3286	0.224467	1.78083	3.36475	3.96532	1.65636	0.88275	8.88752	7.24994	1.13284	0.0147949	4.22098	0.129807	4.98733	0.033702	0.192003	4.26398e-05	0.863371	0.0262036	0.11578	9.00434e-05	0	0	0	0	0
29	0.0683189	0.640027	4.23829	0.206046	0.1455	0.325075	0.0128409	0.497727	0.347709	1.73342	1.51808	0.000526256	0.28826	0.0132542	1.92819	0.0629223	0.226669	0.0157911	0.89768	0.278659	0.273185	0.476557	0.384136	1.63797	0.0395844	0.229822	0.00311752	0.033702	4.24612	0.013213	0.583062	0.226746	0.441554	0.0051942	8.33488e-06	0	0	0	0	0
30	0.413489	0.0298048	0.000204164	0.842948	0.264439	0.41855	0.345187	0.00398963	1.17686	0.427655	0.915816	0.450789	1.99985	0.0035083	0.642084	0.128368	0.000183357	0.128971	0.147531	1.77159	2.1904	0.764053	0.13075	0.000181817	0.101541	0.00894564	0.337908	0.192003	0.013213	0.916761	6.01291	0.448985	0.0903312	0.2343	0.00266341	0	0	0	0	0
31	4.67793	1.52527	1.06134	3.4317	13.7506	2.33412	2.71282	0.740991	7.25161	3.5286	8.90292	2.09803	10.526	1.62131	2.32673	1.8767	1.22332	0.149769	0.0445311	23.2081	15.8215	0.00222382	2.81551	0.133376	0.26751	2.07499	2.43076	4.26398e-05	0.583062	6.01291	87.548	1.35043	1.69385	4.8433	0.0398877	0	0	0	0	0
32	0.410265	0.0996204	0.0114658	0.375105	0.179564	0.85578	0.204184	0.113741	2.89158	0.254949	0.125505	0.0412422	1.24164	0.0013885	6.42259	0.206967	0.299326	1.14731	1.64497	0.323566	0.774335	2.05741	1.11537	0.247175	0.0124848	1.19915	0.337548	0.863371	0.226746	0.448985	1.35043	1.05205	0.00486017	0.00615622	0.000521099	0	0	0	0	0
33	0.315616	0.194567	0.0794798	0.194202	0.0351363	0.000873536	0.114509	0.299015	0.121035	0.00572599	0.0230138	0.186345	0.201294	0.000510846	0.942973	0.00140392	0.0281202	0.143855	0.00153738	1.16309	0.00145427	0.000345039	0.386357	0.0039201	0.000377499	0.015802	0.00778978	0.0262036	0.441554	0.0903312	1.69385	0.00486017	0.29173	0.0443283	0.0124216	0	0	0	0	0
34	0.0361009	0.362991	0.0118253	0.0394931	2.12962	0.0228926	0.0650485	0.0749363	0.0143258	0.606629	1.18163	0.0647473	0.0548396	0.39605	1.37149	0.160422	0.0826168	0.02573	0.359047	1.82523	0.80131	0.117134	0.145532	0.441638	0.0536461	1.0358	0.0916844	0.11578	0.0051942	0.2343	4.8433	0.00615622	0.0443283	0.490984	0.0258495	0	0	0	0	0
35	0.106764	0.13054	0.0332279	0.17511	0.0523247	0.0187841	0.018345	0.00420646	0.00517705	0.0330974	0.0106075	0.116819	0.0874029	0.153969	0.132944	0.221934	0.0107416	0.217633	0.00506494	0.0108999	0.00379606	0.0118156	0.127293	0.0147136	0.000298507	0.109665	0.0350471	9.00434e-05	8.33488e-06	0.00266341	0.0398877	0.000521099	0.0124216	0.0258495	0.0500864	0	0	0	0	0
36-dimensional	245.405	0.32568	4.44194	0.0165057	0.108574	4.68975	4.91098	6.72601	0.915168	0.331126	3.52048	0.0455336	22.3876	7.19251	0.00133182	3.28167	2.10295	22.0578	0.237262	6.65151	0.0142433	0.060664	0.188841	3.27533	0.637413	2.58998	0.00786568	0.0565041	0.00607855	0.295532	4.22788	0.279404	0.310959	0.0151964	0.133018	0.0270398	0	0	0	0
2	0.32568	127.595	4.21545	5.75636	0.354613	10.4891	6.03683	2.93231	7.57853	0.762085	0.00454242	4.84403	1.34655	3.29307	8.18834	5.48682	31.5092	14.7864	0.728859	0.0296011	1.42712	0.920708	28.874	2.16796	0.118934	0.335639	0.197417	0.208459	0.681708	0.0252001	1.48866	0.089988	0.19508	0.351838	0.126733	0.000528389	0	0	0	0
3	4.44194	4.21545	333.343	0.0138314	1.85349	0.72954	0.781071	8.0613	3.50682	9.02411	1.14254	23.0639	6.29724	8.31412	43.2005	0.575568	1.27812	8.86743	0.50445	4.87775	0.715577	6.79826	1.01433	0.597713	0.0710609	6.7406	2.86618	2.03977	14.0473	0.864529	4.05082	0.853476	0.102553	0.255872	0.283005	2.29369	0	0	0	0
4	0.0165057	5.75636	0.0138314	171.748	0.270217	3.57972	0.0410276	0.703742	6.75601	0.801831	1.84988	1.0741	37.1741	0.895737	2.93597	0.656791	0.429242	3.78127	2.943	3.08947	4.74424	0.887411	1.67621	1.77913	0.907858	0.0844422	0.260257	0.00306605	0.179004	0.873912	3.49846	0.398509	0.194819	0.0440776	0.169808	0.0007642	0	0	0	0
5	0.108574	0.354613	1.85349	0.270217	100.284	1.17016	0.774304	0.66064	0.187173	18.8168	0.137539	2.2615	13.8137	2.3972	17.9409	0.564266	2.51704	11.2722	4.81028	4.5271	0.777686	11.2104	3.09919	0.270147	0.672765	13.6482	0.507889	4.3427	0.0921248	0.309656	14.0887	0.141523	0.0358021	2.21316	0.0599648	0.00488064	0	0	0	0
6	4.68975	10.4891	0.72954	3.57972	1.17016	221.005	0.274652	4.29801	5.07037	22.5104	1.05756	7.99693	0.722884	0.55524	20.1096	4.26166	7.16159	0.0810372	0.211009	2.08075	0.766397	4.34323	19.9808	7.85454	1.49234	0.211621	9.40846	1.59276	1.64724	0.067797	1.23864	0.239883	0.00209168	0.0117083	0.0810626	0.408956	0	0	0	0
7	4.91098	6.03683	0.781071	0.0410276	0.774304	0.274652	75.461	0.234473	1.42674	0.00394778	1.69123	14.456	0.068753	0.671452	0.477179	15.4513	0.392805	3.9425	0.568445	1.04807	0.266775	0.797303	2.69089	0.726673	0.433559	5.08745	0.0317322	0.480007	0.0399875	0.174505	2.14581	0.067952	0.10975	0.0199001	0.0401191	0.07889	0	0	0	0
8	6.72601	2.93231	8.0613	0.703742	0.66064	4.29801	0.234473	46.5498	0.869945	4.62343	0.106447	1.97879	3.19457	1.74505	3.32512	0.906059	4.94405	0.175077	0.0627685	0.439337	0.021609	0.161355	5.38607	0.297407	0.177419	0.445087	0.823442	0.159515	0.117898	0.0177153	0.422755	0.311651	0.290099	0.0201624	0.0195505	0.10541	0	0	0	0
9	0.915168	7.57853	3.50682	6.75601	0.187173	5.07037	1.42674	0.869945	130.645	2.06533	6.82176	1.08078	4.3194	0.517774	47.8185	10.7887	2.15672	23.9501	24.1169	0.265612	4.17535	1.08498	0.938588	4.35408	3.02656	1.39452	3.5755	0.922009	0.411996	1.23904	7.41604	3.00094	0.121861	0.0192326	0.00684885	0.00219022	0	0	0	0
10	0.331126	0.762085	9.02411	0.801831	18.8168	22.5104	0.00394778	4.62343	2.06533	137.631	1.95047	2.42512	4.22796	1.63158	6.80827	1.00034	0.162341	0.774027	0.216141	0.816885	4.8892	2.19559	7.88493	0.157612	0.956716	4.5829	0.152389	1.75831	6.70298	0.00127049	1.29604	0.0737658	0.0109269	0.0998171	0.00663855	1.30136	0	0	0	0
11	3.52048	0.00454242	1.14254	1.84988	0.137539	1.05756	1.69123	0.106447	6.82176	1.95047	102.14	14.05	4.94752	0.0118213	0.153282	0.00170575	8.98127	0.459939	2.24898	5.29729	22.8804	0.695805	0.090961	1.69526	1.5912	3.1613	1.18837	0.617318	3.70383	0.338391	6.66192	0.00466572	0.0280257	0.697413	0.00162796	0.385382	0	0	0	0
12	0.0455336	4.84403	23.0639	1.0741	2.2615	7.99693	14.456	1.97879	1.08078	2.42512	14.05	206.449	7.84306	1.78341	4.95249	8.79428	16.0285	19.1585	0.417484	15.1924	0.0480486	6.98603	1.47857	3.15036	0.0135575	0.0294684	0.148166	0.0765237	0.0102994	0.364785	1.89363	0.0161665	0.183917	0.043759	0.135089	0.0124441	0	0	0	0
13	22.3876	1.34655	6.29724	37.1741	13.8137	0.722884	0.068753	3.19457	4.3194	4.22796	4.94752	7.84306	394.576	1.53759	65.7936	12.8339	1.67716	1.03897	3.43745	0.170446	30.487	3.98215	0.358583	3.23	3.16881	1.69872	3.04258	0.181407	1.99217	0.128337	4.45741	0.00558528	0.163591	0.225301	0.488556	3.05119	0	0	0	0
14	7.19251	3.29307	8.31412	0.895737	2.3972	0.55524	0.671452	1.74505	0.517774	1.63158	0.0118213	1.78341	1.53759	39.8993	7.90706e-05	0.148553	3.92735	0.780504	1.24138	2.94008	0.00760866	0.000319095	4.71864	1.50005	0.555626	0.0465593	1.20388	0.581908	0.841325	0.140985	0.650944	0.277487	0.00166429	0.113909	0.0512311	0.517139	0	0	0	0
15	0.00133182	8.18834	43.2005	2.93597	17.9409	20.1096	0.477179	3.32512	47.8185	6.80827	0.153282	4.95249	65.7936	7.90706e-05	351.14	1.42775	2.73279	27.9809	20.4132	17.7514	0.372087	31.4253	1.83308	27.1661	2.81575	8.04238	0.589631	5.30363	11.675	0.0887678	7.31691	1.68086	1.03444	3.64438	0.615425	3.30669	0	0	0	0
16	3.28167	5.48682	0.575568	0.656791	0.564266	4.26166	15.4513	0.906059	10.7887	1.00034	0.00170575	8.79428	12.8339	0.148553	1.42775	48.6476	4.24881	5.97914	2.89982	6.32623	0.374605	3.78178	0.777615	0.974842	0.0275062	0.520557	0.34698	0.469048	0.519695	0.375812	2.70045	0.550265	0.000718612	0.326659	0.323085	0.177598	0	0	0	0
17	2.10295	31.5092	1.27812	0.429242	2.51704	7.16159	0.392805	4.94405	2.15672	0.162341	8.98127	16.0285	1.67716	3.92735	2.73279	4.24881	165.023	17.0712	4.4124	5.37434	25.0761	19.2854	49.1189	4.47439	0.625147	7.64923	0.135729	2.54899	0.0115545	0.0916515	0.587722	0.815872	0.0238559	0.00564189	0.0503783	0.27375	0	0	0	0
18	22.0578	14.7864	8.86743	3.78127	11.2722	0.0810372	3.9425	0.175077	23.9501	0.774027	0.459939	19.1585	1.03897	0.780504	27.9809	5.97914	17.0712	215.553	43.4164	0.0143445	0.00528086	15.9994	9.47322	0.0109837	0.00463878	2.95422	1.00552	2.57525	0.148636	0.00673687	0.00804552	0.57632	0.152785	0.119984	0.130096	0.210045	0	0	0	0
19	0.237262	0.728859	0.50445	2.943	4.81028	0.211009	0.568445	0.0627685	24.1169	0.216141	2.24898	0.417484	3.43745	1.24138	20.4132	2.89982	4.4124	43.4164	69.5812	0.340511	0.186322	8.39038	0.365307	2.88459	0.0591526	9.16676	0.747917	3.40519	0.387331	0.0432253	0.000481806	1.17541	0.00101349	0.514781	1.49691e-05	0.0849522	0	0	0	0
20	6.65151	0.0296011	4.87775	3.08947	4.5271	2.08075	1.04807	0.439337	0.265612	0.816885	5.29729	15.1924	0.170446	2.94008	17.7514	6.32623	5.37434	0.0143445	0.340511	113.028	5.99939	3.48541	0.0356102	11.879	0.268553	1.40695	0.245188	1.16317	0.00404591	2.50471	25.8825	0.726182	1.18592	2.31016	6.87722e-05	0.173256	0	0	0	0
21	0.0142433	1.42712	0.715577	4.74424	0.777686	0.766397	0.266775	0.021609	4.17535	4.8892	22.8804	0.0480486	30.487	0.00760866	0.372087	0.374605	25.0761	0.00528086	0.186322	5.99939	93.6078	0.00496957	4.13482	1.94837	8.32083	0.0720887	1.49387	1.1157	0.0690419	2.62719	17.0468	1.07865	0.00193867	0.979545	6.0954e-05	0.0542994	0	0	0	0
22	0.060664	0.920708	6.79826	0.887411	11.2104	4.34323	0.797303	0.161355	1.08498	2.19559	0.695805	6.98603	3.98215	0.000319095	31.4253	3.78178	19.2854	15.9994	8.39038	3.48541	0.00496957	86.6643	11.6679	0.0391056	0.136782	0.949822	4.70111	7.18111	1.85386	0.260428	0.191438	1.05008	1.12228e-05	0.343928	0.0613316	0.362147	0	0	0	0
23	0.188841	28.874	1.01433	1.67621	3.09919	19.9808	2.69089	5.38607	0.938588	7.88493	0.090961	1.47857	0.358583	4.71864	1.83308	0.777615	49.1189	9.47322	0.365307	0.0356102	4.13482	11.6679	163.718	3.94069	0.361903	7.7084	0.797912	9.1794	0.0171727	0.590611	4.47162	2.29318	0.365475	0.428568	0.262362	0.453131	0	0	0	0
24	3.27533	2.16796	0.597713	1.77913	0.270147	7.85454	0.726673	0.297407	4.35408	0.157612	1.69526	3.15036	3.23	1.50005	27.1661	0.974842	4.47439	0.0109837	2.88459	11.879	1.94837	0.0391056	3.94069	29.6445	3.42315	1.18373	0.451934	0.353066	0.0542384	0.337424	0.948857	0.0200942	0.00151037	1.09297	0.114263	0.881016	0	0	0	0
25	0.637413	0.118934	0.0710609	0.907858	0.672765	1.49234	0.433559	0.177419	3.02656	0.956716	1.5912	0.0135575	3.16881	0.555626	2.81575	0.0275062	0.625147	0.00463878	0.0591526	0.268553	8.32083	0.136782	0.361903	3.42315	3.60001	0.117832	0.101395	0.0451584	1.15046e-05	0.183458	0.403095	0.000138146	0.000576919	0.0931681	0.000605717	0.0329113	0	0	0	0
26	2.58998	0.335639	6.7406	0.0844422	13.6482	0.211621	5.08745	0.445087	1.39452	4.5829	3.1613	0.0294684	1.69872	0.0465593	8.04238	0.520557	7.64923	2.95422	9.16676	1.40695	0.0720887	0.949822	7.7084	1.18373	0.117832	31.6975	1.46589	5.02353	0.801758	0.102427	1.43649	1.81964	0.0135187	0.75063	0.0600436	0.139107	0	0	0	0
27	0.00786568	0.197417	2.86618	0.260257	0.507889	9.40846	0.0317322	0.823442	3.5755	0.152389	1.18837	0.148166	3.04258	1.20388	0.589631	0.34698	0.135729	1.00552	0.747917	0.245188	1.49387	4.70111	0.797912	0.451934	0.101395	1.46589	12.1495	0.129563	0.0032023	0.338384	2.43213	0.338083	0.00778676	0.0918506	0.0351056	4.57084e-07	0	0	0	0
28	0.0565041	0.208459	2.03977	0.00306605	4.3427	1.59276	0.480007	0.159515	0.922009	1.75831	0.617318	0.0765237	0.181407	0.581908	5.30363	0.469048	2.54899	2.57525	3.40519	1.16317	1.1157	7.18111	9.1794	0.353066	0.0451584	5.02353	0.129563	5.86467	0.363946	0.443077	0.0628105	1.40496	0.0232122	0.0351834	0.00928742	0.141584	0	0	0	0
29	0.00607855	0.681708	14.0473	0.179004	0.0921248	1.64724	0.0399875	0.117898	0.411996	6.70298	3.70383	0.0102994	1.99217	0.841325	11.675	0.519695	0.0115545	0.148636	0.387331	0.00404591	0.0690419	1.85386	0.0171727	0.0542384	1.15046e-05	0.801758	0.0032023	0.363946	8.97117	0.153316	1.70857	0.00886843	0.470176	0.0717942	0.0385555	0.702057	0	0	0	0
30	0.295532	0.0252001	0.864529	0.873912	0.309656	0.067797	0.174505	0.0177153	1.23904	0.00127049	0.338391	0.364785	0.128337	0.140985	0.0887678	0.375812	0.0916515	0.00673687	0.0432253	2.50471	2.62719	0.260428	0.590611	0.337424	0.183458	0.102427	0.338384	0.443077	0.153316	1.51777	7.54435	0.958774	0.0973692	0.44665	0.00283487	0.206207	0	0	0	0
31	4.22788	1.48866	4.05082	3.49846	14.0887	1.23864	2.14581	0.422755	7.41604	1.29604	6.66192	1.89363	4.45741	0.650944	7.31691	2.70045	0.587722	0.00804552	0.000481806	25.8825	17.0468	0.191438	4.47162	0.948857	0.403095	1.43649	2.43213	0.0628105	1.70857	7.54435	93.5635	2.2314	1.72609	5.75279	0.0974922	0.237465	0	0	0	0
32	0.279404	0.089988	0.853476	0.398509	0.141523	0.239883	0.067952	0.311651	3.00094	0.0737658	0.00466572	0.0161665	0.00558528	0.277487	1.68086	0.550265	0.815872	0.57632	1.17541	0.726182	1.07865	1.05008	2.29318	0.0200942	0.000138146	1.81964	0.338083	1.40496	0.00886843	0.958774	2.2314	1.88723	0.00322374	0.0817755	0.00907089	0.26147	0	0	0	0
33	0.310959	0.19508	0.102553	0.194819	0.0358021	0.00209168	0.10975	0.290099	0.121861	0.0109269	0.0280257	0.183917	0.163591	0.00166429	1.03444	0.000718612	0.0238559	0.152785	0.00101349	1.18592	0.00193867	1.12228e-05	0.365475	0.00151037	0.000576919	0.0135187	0.00778676	0.0232122	0.470176	0.0973692	1.72609	0.00322374	0.29225	0.0476354	0.0114627	0.000361204	0	0	0	0
34	0.0151964	0.351838	0.255872	0.0440776	2.21316	0.0117083	0.0199001	0.0201624	0.0192326	0.0998171	0.697413	0.043759	0.225301	0.113909	3.64438	0.326659	0.00564189	0.119984	0.514781	2.31016	0.979545	0.343928	0.428568	1.09297	0.0931681	0.75063	0.0918506	0.0351834	0.0717942	0.44665	5.75279	0.0817755	0.0476354	0.679645	0.0534372	0.0929256	0	0	0	0
35	0.133018	0.126733	0.283005	0.169808	0.0599648	0.0810626	0.0401191	0.0195505	0.00684885	0.00663855	0.00162796	0.135089	0.488556	0.0512311	0.615425	0.323085	0.0503783	0.130096	1.49691e-05	6.87722e-05	6.0954e-05	0.0613316	0.262362	0.114263	0.000605717	0.0600436	0.0351056	0.00928742	0.0385555	0.00283487	0.0974922	0.00907089	0.0114627	0.0534372	0.0696169	0.0300856	0	0	0	0
36	0.0270398	0.000528389	2.29369	0.0007642	0.00488064	0.408956	0.07889	0.10541	0.00219022	1.30136	0.385382	0.0124441	3.05119	0.517139	3.30669	0.177598	0.27375	0.210045	0.0849522	0.173256	0.0542994	0.362147	0.453131	0.881016	0.0329113	0.139107	4.57084e-07	0.141584	0.702057	0.206207	0.237465	0.26147	0.000361204	0.0929256	0.0300856	0.564301	0	0	0	0
37-dimensional	246.183	0.303782	4.37011	0.0138479	0.0660821	4.71823	5.8187	6.58717	1.06304	0.363304	3.8038	0.0240036	22.7893	7.489	0.0226485	2.78565	2.38379	22.2587	0.220856	6.98478	0.0179195	0.107942	0.147321	3.42616	0.802479	2.70548	0.061848	0.109868	0.00218331	0.252568	3.96953	0.267012	0.294771	0.0165218	0.151332	0.0135208	0.00632168	0	0	0
2	0.303782	127.943	4.16031	5.71564	0.289936	10.4557	6.8195	3.00532	7.90448	0.800092	8.28466e-05	5.04875	1.27045	3.45129	8.7101	6.02508	30.6855	14.9159	0.705995	0.0148349	1.39994	0.80063	29.3049	2.26455	0.071907	0.3688	0.325239	0.146499	0.641697	0.0365114	1.61379	0.0956751	0.184984	0.346938	0.14072	0.00370943	0.00391907	0	0	0
3	4.37011	4.16031	333.775	0.0156398	1.71985	0.737303	0.560132	8.16709	3.31715	8.91121	1.03591	22.6781	6.44445	8.09776	42.1724	0.734486	1.42868	8.77993	0.487783	5.07426	0.73263	7.09748	1.08609	0.554551	0.111434	6.614	2.50446	1.85912	14.2094	0.91804	4.23004	0.868661	0.109158	0.25221	0.301129	2.19412	0.00301138	0	0	0
4	0.0138479	5.71564	0.0156398	171.871	0.304013	3.59055	0.0829279	0.723541	6.9255	0.780669	1.76321	1.12752	36.9501	0.851195	3.10859	0.761248	0.48444	3.8175	2.91744	2.99253	4.77183	0.821207	1.61948	1.82732	0.990523	0.0936653	0.336216	0.000211337	0.167676	0.907673	3.60321	0.405055	0.200515	0.0431203	0.161199	4.44806e-05	0.00119917	0	0	0
5	0.0660821	0.289936	1.71985	0.304013	104.569	1.12901	2.11131	0.794626	0.0463296	18.1308	0.344814	2.80441	12.9112	1.92765	20.8738	1.3633	1.72249	11.6948	4.59307	5.35547	0.854309	9.65882	3.64314	0.159491	1.22085	12.8926	1.39289	3.27592	0.15587	0.190505	12.7237	0.168786	0.0213841	2.25916	0.0302331	0.0443457	0.0539775	0	0	0
6	4.71823	10.4557	0.737303	3.59055	1.12901	221.056	0.331809	4.2685	5.15952	22.5791	1.0176	7.90959	0.742042	0.577053	20.3813	4.10722	7.2952	0.0778505	0.215202	2.12981	0.759677	4.43451	19.8609	7.79348	1.42995	0.203059	9.15023	1.65607	1.62606	0.0735807	1.27656	0.242969	0.00175044	0.012012	0.0774387	0.425436	0.00044365	0	0	0
7	5.8187	6.8195	0.560132	0.0829279	2.11131	0.331809	104.825	0.0736401	3.17918	0.0777828	0.510854	18.1864	0.0051908	0.149412	2.53655	25.5859	0.013294	4.64144	0.382342	0.269203	0.161319	0.0586956	1.53518	1.38863	0.0126191	6.43295	2.085	2.05794	0.199904	0.00862207	0.921634	0.0278526	0.0461903	0.0333822	0.154074	0.0100234	0.395652	0	0	0
8	6.58717	3.00532	8.16709	0.723541	0.794626	4.2685	0.0736401	46.9491	1.02708	4.49684	0.0604701	1.80433	3.03275	1.59168	3.79165	1.22443	4.50171	0.156231	0.0537924	0.535958	0.0172247	0.241033	5.64468	0.250634	0.0995211	0.395172	0.538437	0.0885884	0.0957646	0.0315661	0.337489	0.326182	0.273157	0.0218174	0.0276205	0.0742026	0.00744631	0	0	0
9	1.06304	7.90448	3.31715	6.9255	0.0463296	5.15952	3.17918	1.02708	135.799	2.30762	8.03176	1.47629	3.80844	0.781053	52.667	13.7811	1.4092	24.5811	23.6143	0.104878	3.99919	0.631724	0.666762	3.85336	2.09472	1.15431	1.99017	0.46084	0.541132	1.52859	8.49573	3.12546	0.154628	0.015101	0.0242347	0.00954966	0.0569316	0	0	0
10	0.363304	0.800092	8.91121	0.780669	18.1308	22.5791	0.0777828	4.49684	2.30762	138.338	2.18495	2.22869	4.03871	1.78921	7.47944	1.33904	0.0897499	0.815947	0.234058	0.694733	4.81873	1.93529	7.57415	0.123632	0.758262	4.75184	0.0458386	2.0429	6.52596	9.21149e-05	1.46105	0.0668422	0.00780169	0.0961867	0.00299308	1.42522	0.00767245	0	0	0
11	3.8038	8.28466e-05	1.03591	1.76321	0.344814	1.0176	0.510854	0.0604701	8.03176	2.18495	106.659	12.7718	5.52478	0.0740619	0.53579	0.147698	7.38073	0.550447	2.09805	6.21101	22.4675	1.16591	0.0225231	1.38997	0.941775	2.7956	2.45857	0.25572	4.07164	0.210744	5.71443	0.0107559	0.0446639	0.723915	0.0127497	0.227495	0.0563854	0	0	0
12	0.0240036	5.04875	22.6781	1.12752	2.80441	7.90959	18.1864	1.80433	1.47629	2.22869	12.7718	210.429	7.29498	1.45546	6.22114	10.9002	14.3065	19.6015	0.366885	14.0419	0.0642283	5.9985	1.78381	3.50466	0.119833	0.0652051	5.84677e-05	0.247706	0.000774334	0.491129	2.33039	0.024056	0.214867	0.0387207	0.0962565	0.0506733	0.0351473	0	0	0
13	22.7893	1.27045	6.44445	36.9501	12.9112	0.742042	0.0051908	3.03275	3.80844	4.03871	5.52478	7.29498	397.442	1.31501	62.6795	11.1526	1.28867	0.966145	3.54663	0.27209	30.2143	4.56122	0.262504	3.48733	2.6052	1.86006	4.06826	0.343056	2.1453	0.0830892	4.01001	0.00901338	0.143941	0.216866	0.548161	2.77119	0.0183621	0	0	0
14	7.489	3.45129	8.09776	0.851195	1.92765	0.577053	0.149412	1.59168	0.781053	1.78921	0.0740619	1.45546	1.31501	41.4396	0.0678661	0.00502335	3.14966	0.865947	1.1585	2.47685	0.0142259	0.0267861	5.21768	1.73108	0.922464	0.0865038	0.553621	0.94045	0.719591	0.0811329	0.89806	0.250605	6.93873e-05	0.106202	0.0783848	0.681316	0.0307971	0	0	0
15	0.0226485	8.7101	42.1724	3.10859	20.8738	20.3813	2.53655	3.79165	52.667	7.47944	0.53579	6.22114	62.6795	0.0678661	371.062	3.42332	1.49278	29.0287	19.7071	20.3106	0.295096	27.3281	2.51925	25.227	1.51288	7.14331	0.00103059	3.50372	10.7139	0.0119022	5.81549	1.82518	0.901426	3.73737	0.452602	4.16113	0.133677	0	0	0
16	2.78565	6.02508	0.734486	0.761248	1.3633	4.10722	25.5859	1.22443	13.7811	1.33904	0.147698	10.9002	11.1526	0.00502335	3.42332	60.7468	2.31669	6.59413	2.57391	4.61526	0.483733	2.16647	1.37705	1.49864	0.15542	0.856603	0.10939	0.0212878	0.810861	0.720984	4.04067	0.656014	0.00333501	0.292988	0.501383	0.0209036	0.208906	0	0	0
17	2.38379	30.6855	1.42868	0.48444	1.72249	7.2952	0.013294	4.50171	1.4092	0.0897499	7.38073	14.3065	1.28867	3.14966	1.49278	2.31669	174.267	16.4105	4.68908	6.55223	25.6293	22.1153	46.4651	3.83921	1.34396	8.41007	0.0561512	3.80752	0.000114522	0.0217163	1.01621	0.736857	0.0441445	0.00304682	0.0175614	0.497617	0.0904948	0	0	0
18	22.2587	14.9159	8.77993	3.8175	11.6948	0.0778505	4.64144	0.156231	24.5811	0.815947	0.550447	19.6015	0.966145	0.865947	29.0287	6.59413	16.4105	216.092	43.2221	0.00420295	0.00725343	15.438	9.74397	0.0196756	0.000248385	2.85013	0.748262	2.32274	0.128624	0.0137895	0.0209174	0.591918	0.143047	0.123143	0.145622	0.249762	0.00468431	0	0	0
19	0.220856	0.705995	0.487783	2.91744	4.59307	0.215202	0.382342	0.0537924	23.6143	0.234058	2.09805	0.366885	3.54663	1.1585	19.7071	2.57391	4.68908	43.2221	69.7791	0.393962	0.195089	8.72307	0.324131	2.98218	0.0964619	9.31598	0.951521	3.64866	0.360911	0.0322241	0.000491742	1.1577	0.000469346	0.509571	0.000167244	0.0666494	0.00302258	0	0	0
20	6.98478	0.0148349	5.07426	2.99253	5.35547	2.12981	0.269203	0.535958	0.104878	0.694733	6.21101	14.0419	0.27209	2.47685	20.3106	4.61526	6.55223	0.00420295	0.393962	116.549	5.8177	4.3208	0.101964	11.1591	0.0715003	1.19854	0.822793	0.700792	0.0207445	2.18125	24.238	0.675099	1.10488	2.35154	0.00501911	0.291837	0.0418974	0	0	0
21	0.0179195	1.39994	0.73263	4.77183	0.854309	0.759677	0.161319	0.0172247	3.99919	4.81873	22.4675	0.0642283	30.2143	0.0142259	0.295096	0.483733	25.6293	0.00725343	0.195089	5.8177	93.7724	0.000498649	4.25654	2.01631	8.65326	0.0613591	1.27359	1.00272	0.0597625	2.70574	17.3568	1.09312	0.00277144	0.973453	4.12466e-05	0.0419508	0.00216811	0	0	0
22	0.107942	0.80063	7.09748	0.821207	9.65882	4.43451	0.0586956	0.241033	0.631724	1.93529	1.16591	5.9985	4.56122	0.0267861	27.3281	2.16647	22.1153	15.438	8.72307	4.3208	0.000498649	91.8187	10.5464	0.111849	0.480342	1.1932	2.68104	8.94489	2.14681	0.139938	0.421512	0.97102	0.0020655	0.323752	0.107755	0.195381	0.0695757	0	0	0
23	0.147321	29.3049	1.08609	1.61948	3.64314	19.8609	1.53518	5.64468	0.666762	7.57415	0.0225231	1.78381	0.262504	5.21768	2.51925	1.37705	46.4651	9.74397	0.324131	0.101964	4.25654	10.5464	166.386	4.28256	0.641562	7.31034	1.49013	8.05355	0.0380155	0.72685	5.041	2.36725	0.329985	0.41458	0.315775	0.330158	0.0264763	0	0	0
24	3.42616	2.26455	0.554551	1.82732	0.159491	7.79348	1.38863	0.250634	3.85336	0.123632	1.38997	3.50466	3.48733	1.73108	25.227	1.49864	3.83921	0.0196756	2.98218	11.1591	2.01631	0.111849	4.28256	30.3949	4.04855	1.31557	0.880184	0.562521	0.0327513	0.421374	1.16672	0.0260682	0.000207863	1.07476	0.143194	0.737171	0.0174612	0	0	0
25	0.802479	0.071907	0.111434	0.990523	1.22085	1.42995	0.0126191	0.0995211	2.09472	0.758262	0.941775	0.119833	2.6052	0.922464	1.51288	0.15542	1.34396	0.000248385	0.0964619	0.0715003	8.65326	0.480342	0.641562	4.04855	5.19968	0.0415248	0.0963501	0.024326	0.0159174	0.347763	0.784449	0.00340401	0.00669572	0.0809678	0.014425	6.16621e-05	0.0976419	0	0	0
26	2.70548	0.3688	6.614	0.0936653	12.8926	0.203059	6.43295	0.395172	1.15431	4.75184	2.7956	0.0652051	1.86006	0.0865038	7.14331	0.856603	8.41007	2.85013	9.31598	1.19854	0.0613591	1.1932	7.31034	1.31557	0.0415248	32.2723	2.07306	5.64326	0.723665	0.0682505	1.66383	1.77413	0.0188592	0.737629	0.078302	0.195292	0.0129577	0	0	0
27	0.061848	0.325239	2.50446	0.336216	1.39289	9.15023	2.085	0.538437	1.99017	0.0458386	2.45857	5.84677e-05	4.06826	0.553621	0.00103059	0.10939	0.0561512	0.748262	0.951521	0.822793	1.27359	2.68104	1.49013	0.880184	0.0963501	2.07306	20.415	0.0601091	0.0210344	0.100273	1.31714	0.254961	0.033554	0.113596	0.000932844	0.0970312	0.263335	0	0	0
28	0.109868	0.146499	1.85912	0.000211337	3.27592	1.65607	2.05794	0.0885884	0.46084	2.0429	0.25572	0.247706	0.343056	0.94045	3.50372	0.0212878	3.80752	2.32274	3.64866	0.700792	1.00272	8.94489	8.05355	0.562521	0.024326	5.64326	0.0601091	7.70778	0.235357	0.260437	8.6148e-05	1.30068	0.0432574	0.028112	2.00576e-05	0.311819	0.0904181	0	0	0
29	0.00218331	0.641697	14.2094	0.167676	0.15587	1.62606	0.199904	0.0957646	0.541132	6.52596	4.07164	0.000774334	2.1453	0.719591	10.7139	0.810861	0.000114522	0.128624	0.360911	0.0207445	0.0597625	2.14681	0.0380155	0.0327513	0.0159174	0.723665	0.0210344	0.235357	9.20853	0.196518	1.92525	0.0119051	0.495939	0.0682839	0.0515169	0.604046	0.0100379	0	0	0
30	0.252568	0.0365114	0.91804	0.907673	0.190505	0.0735807	0.00862207	0.0315661	1.52859	9.21149e-05	0.210744	0.491129	0.0830892	0.0811329	0.0119022	0.720984	0.0217163	0.0137895	0.0322241	2.18125	2.70574	0.139938	0.72685	0.421374	0.347763	0.0682505	0.100273	0.260437	0.196518	1.69002	8.13622	0.997616	0.113169	0.435072	0.008741	0.140119	0.0173469	0	0	0
31	3.96953	1.61379	4.23004	3.60321	12.7237	1.27656	0.921634	0.337489	8.49573	1.46105	5.71443	2.33039	4.01001	0.89806	5.81549	4.04067	1.01621	0.0209174	0.000491742	24.238	17.3568	0.421512	5.041	1.16672	0.784449	1.66383	1.31714	8.6148e-05	1.92525	8.13622	96.7682	2.3235	1.82701	5.68798	0.140462	0.132015	0.0418869	0	0	0
32	0.267012	0.0956751	0.868661	0.405055	0.168786	0.242969	0.0278526	0.326182	3.12546	0.0668422	0.0107559	0.024056	0.00901338	0.250605	1.82518	0.656014	0.736857	0.591918	1.1577	0.675099	1.09312	0.97102	2.36725	0.0260682	0.00340401	1.77413	0.254961	1.30068	0.0119051	0.997616	2.3235	1.90284	0.00247448	0.0803423	0.0114191	0.238449	0.00144556	0	0	0
33	0.294771	0.184984	0.109158	0.200515	0.0213841	0.00175044	0.0461903	0.273157	0.154628	0.00780169	0.0446639	0.214867	0.143941	6.93873e-05	0.901426	0.00333501	0.0441445	0.143047	0.000469346	1.10488	0.00277144	0.0020655	0.329985	0.000207863	0.00669572	0.0188592	0.033554	0.0432574	0.495939	0.113169	1.82701	0.00247448	0.301762	0.0462819	0.00858354	9.15569e-05	0.00222548	0	0	0
34	0.0165218	0.346938	0.25221	0.0431203	2.25916	0.012012	0.0333822	0.0218174	0.015101	0.0961867	0.723915	0.0387207	0.216866	0.106202	3.73737	0.292988	0.00304682	0.123143	0.509571	2.35154	0.973453	0.323752	0.41458	1.07476	0.0809678	0.737629	0.113596	0.028112	0.0682839	0.435072	5.68798	0.0803423	0.0462819	0.681489	0.0510787	0.0992639	0.000284968	0	0	0
35	0.151332	0.14072	0.301129	0.161199	0.0302331	0.0774387	0.154074	0.0276205	0.0242347	0.00299308	0.0127497	0.0962565	0.548161	0.0783848	0.452602	0.501383	0.0175614	0.145622	0.000167244	0.00501911	4.12466e-05	0.107755	0.315775	0.143194	0.014425	0.078302	0.000932844	2.00576e-05	0.0515169	0.008741	0.140462	0.0114191	0.00858354	0.0510787	0.0827511	0.0159393	0.00607277	0	0	0
36	0.0135208	0.00370943	2.19412	4.44806e-05	0.0443457	0.425436	0.0100234	0.0742026	0.00954966	1.42522	0.227495	0.0506733	2.77119	0.681316	4.16113	0.0209036	0.497617	0.249762	0.0666494	0.291837	0.0419508	0.195381	0.330158	0.737171	6.16621e-05	0.195292	0.0970312	0.311819	0.604046	0.140119	0.132015	0.238449	9.15569e-05	0.0992639	0.0159393	0.713607	0.0238559	0	0	0
37	0.00632168	0.00391907	0.00301138	0.00119917	0.0539775	0.00044365	0.395652	0.00744631	0.0569316	0.00767245	0.0563854	0.0351473	0.0183621	0.0307971	0.133677	0.208906	0.0904948	0.00468431	0.00302258	0.0418974	0.00216811	0.0695757	0.0264763	0.0174612	0.0976419	0.0129577	0.263335	0.0904181	0.0100379	0.0173469	0.0418869	0.00144556	0.00222548	0.000284968	0.00607277	0.0238559	0.065025	0	0	0
38-dimensional	252.327	0.266506	4.42538	0.0992053	0.197947	4.17298	7.19077	8.79974	1.89256	1.09128	3.21006	0.43199	27.1143	8.62137	0.171128	2.44692	3.77876	16.0593	0.363632	7.56366	0.181106	0.186535	0.256292	2.86438	0.369855	3.91192	0.119969	0.274988	0.0223875	0.00722691	3.0924	0.378303	0.0739482	0.317322	0.0272426	0.077768	0.338128	0.0984448	0	0
2	0.266506	128.084	4.16996	5.88619	0.327376	10.6063	7.07431	2.76165	8.2561	0.948249	0.00141198	4.65176	1.10119	3.58568	8.12274	6.11773	29.8955	13.9473	0.746695	0.0105136	1.2788	0.767782	29.0675	2.17972	0.102257	0.44496	0.345539	0.121194	0.586485	0.0707626	1.72217	0.0850699	0.145516	0.261111	0.112181	0.0173759	0.0031381	0.00317044	0	0
3	4.42538	4.16996	333.807	0.01916	1.68665	0.752425	0.587769	8.32261	3.40271	9.09077	1.01415	22.3552	6.29632	8.17487	41.6776	0.722376	1.36467	8.4971	0.475277	5.04157	0.699204	7.06024	1.10344	0.538676	0.124819	6.73051	2.52543	1.89492	14.1094	0.864653	4.16516	0.881118	0.0973681	0.282649	0.318004	2.27411	0.00992788	0.000451469	0	0
4	0.0992053	5.88619	0.01916	177.156	0.550306	4.1048	0.000221258	1.57764	5.2084	1.77311	1.36186	2.46848	42.4843	1.26559	5.45275	0.587182	0.0844034	7.15136	2.47477	3.38089	3.5672	1.0221	1.31896	2.28774	1.65609	0.000998184	0.231182	0.0441602	0.370341	0.280241	2.75933	0.541894	0.0299421	0.420499	0.0304254	0.165891	0.496731	0.101194	0	0
5	0.197947	0.327376	1.68665	0.550306	108.31	0.879227	1.42327	1.63186	0.30026	21.9456	0.548157	4.66367	16.0923	2.49986	26.1468	1.13736	2.88498	16.8564	4.05898	4.88663	0.413062	10.2889	4.10827	0.0606721	1.91159	15.3046	1.17922	3.98479	0.0421315	0.704835	14.385	0.255792	0.166327	1.17364	0.00179103	0.0291951	0.757618	0.0917377	0	0
6	4.17298	10.6063	0.752425	4.1048	0.879227	223.621	0.157578	3.24071	4.17111	19.8736	0.815919	6.14276	0.328725	0.393053	23.9084	4.39436	5.92962	0.0373719	0.3051	1.92663	1.13532	4.14986	19.1421	7.21612	1.00917	0.451597	9.54727	1.34241	1.976	3.99937e-05	0.949439	0.311687	0.04928	0.0321965	0.0167422	0.151761	0.212045	0.0435067	0	0
7	7.19077	7.07431	0.587769	0.000221258	1.42327	0.157578	112.599	0.680463	5.10814	0.793142	0.873054	12.7393	0.451423	0.01215	0.658876	27.074	0.447455	1.37099	0.644057	0.137098	4.56661e-06	0.0098423	1.98385	0.919573	0.0817075	8.98386	2.49373	2.89548	0.516818	0.235353	0.404906	0.0918122	0.0256636	0.615501	0.00680763	0.41873	0.081775	0.18863	0	0
8	8.79974	2.76165	8.32261	1.57764	1.63186	3.24071	0.680463	58.8857	0.0931301	9.17283	0.00642455	0.0967059	6.92728	2.79498	9.65082	0.794331	8.66484	1.13384	0.00172349	0.261649	0.533901	0.0775977	6.90346	0.0305662	0.0759857	1.72393	0.873289	0.481784	0.508305	0.462932	1.12675	0.597829	1.16539	0.556143	0.392415	1.17598	2.08695	0.415728	0	0
9	1.89256	8.2561	3.40271	5.2084	0.30026	4.17111	5.10814	0.0931301	150.399	5.29818	6.51783	0.105821	1.40186	1.53098	39.1619	15.1932	0.229161	13.6861	25.9604	0.0178846	2.19969	0.374241	1.06792	5.03468	3.8291	0.234773	1.53199	0.113659	1.17374	3.9043	11.0818	2.53998	0.762499	0.418856	0.0580838	0.636182	0.868914	0.308837	0	0
10	1.09128	0.948249	9.09077	1.77311	21.9456	19.8736	0.793142	9.17283	5.29818	162.951	1.24957	6.9359	1.05187	3.20737	2.11322	1.94624	0.370459	0.504356	0.0329858	0.347813	2.34929	1.33736	9.18174	0.506438	2.32261	8.62086	5.93634e-05	3.48727	4.44665	0.917391	3.02681	0.232169	0.2778	0.458579	0.317305	4.37296	1.99784	0.50767	0	0
11	3.21006	0.00141198	1.01415	1.36186	0.548157	0.815919	0.873054	0.00642455	6.51783	1.24957	109.348	10.012	3.98862	0.0119644	1.42084	0.0893367	9.25901	1.74572	1.79551	5.78243	24.7789	0.991025	0.00252512	1.10187	0.541553	3.77737	2.21516	0.439569	3.45116	0.639251	6.66238	0.0338152	9.2645e-05	0.246337	0.0873372	0.638659	0.602829	0.0654508	0	0
12	0.43199	4.65176	22.3552	2.46848	4.66367	6.14276	12.7393	0.0967059	0.105821	6.9359	10.012	249.731	14.5889	2.96429	15.6071	9.1876	23.1826	39.2062	0.0687552	16.1953	0.249574	7.37655	2.7279	5.20451	1.18533	0.365207	0.067487	1.12182e-07	0.285894	0.142182	0.851759	0.16723	0.0557018	1.74007	0.0717635	0.631927	3.58644	0.656012	0	0
13	27.1143	1.10119	6.29632	42.4843	16.0923	0.328725	0.451423	6.92728	1.40186	1.05187	3.98862	14.5889	436.849	0.493122	84.1506	9.64886	0.0598112	6.57989	2.51835	0.578584	23.4951	5.59726	0.616199	2.29337	5.08336	4.43287	4.99298	1.03091	3.61734	0.41162	2.19561	0.0153843	0.0502075	0.252504	0.0583937	0.615829	1.78607	0.48818	0	0
14	8.62137	3.58568	8.17487	1.26559	2.49986	0.393053	0.01215	2.79498	1.53098	3.20737	0.0119644	2.96429	0.493122	44.1178	0.10126	0.00133892	1.86175	0.0406932	1.47097	2.1424	0.175142	0.072729	4.65971	1.32958	0.442723	0.404153	0.414561	1.36347	0.418442	0.0205878	1.41025	0.36177	0.0727138	0.0144253	0.00252344	1.51477	0.252564	0.10359	0	0
15	0.171128	8.12274	41.6776	5.45275	26.1468	23.9084	0.658876	9.65082	39.1619	2.11322	1.42084	15.6071	84.1506	0.10126	436.752	2.39162	5.67076	55.4691	16.4307	17.6025	1.92915	30.5508	3.772	20.821	0.156828	13.2366	0.0994012	5.9106	14.7647	1.74153	9.54502	2.67675	3.0106	0.452545	0.000549565	0.799703	5.20751	0.827479	0	0
16	2.44692	6.11773	0.722376	0.587182	1.13736	4.39436	27.074	0.794331	15.1932	1.94624	0.0893367	9.1876	9.64886	0.00133892	2.39162	61.6292	1.70758	4.7759	2.80891	4.37031	0.726848	2.00577	1.2267	1.29695	0.057297	1.22063	0.146939	0.00176689	1.01242	1.15328	4.56266	0.57306	0.0414716	0.0943785	0.345166	0.00464539	0.0102411	0.028534	0	0
17	3.77876	29.8955	1.36467	0.0844034	2.88498	5.92962	0.447455	8.66484	0.229161	0.370459	9.25901	23.1826	0.0598112	1.86175	5.67076	1.70758	196.645	30.3744	3.57944	7.73031	32.0591	24.1583	49.9589	5.22233	0.322708	12.8485	0.191591	5.51225	0.171613	0.505278	2.21621	1.12467	0.588413	0.702914	0.351445	2.30302	1.11878	0.415858	0	0
18	16.0593	13.9473	8.4971	7.15136	16.8564	0.0373719	1.37099	1.13384	13.6861	0.504356	1.74572	39.2062	6.57989	0.0406932	55.4691	4.7759	30.3744	299.093	37.0699	0.208615	0.960218	18.5459	12.7345	0.517172	1.13648	8.43428	1.49243	4.96616	1.15684	1.98007	0.502958	1.27328	1.87055	1.52907	1.43842	0.889286	6.15983	1.31242	0	0
19	0.363632	0.746695	0.475277	2.47477	4.05898	0.3051	0.644057	0.00172349	25.9604	0.0329858	1.79551	0.0687552	2.51835	1.47097	16.4307	2.80891	3.57944	37.0699	71.3075	0.30721	0.0586703	8.3106	0.235814	3.36837	0.257338	7.9777	0.82568	3.16206	0.540262	0.216259	0.0189697	1.01753	0.0428379	1.02242	0.0275824	0.279177	0.257024	0.0460326	0	0
20	7.56366	0.0105136	5.04157	3.38089	4.88663	1.92663	0.137098	0.261649	0.0178846	0.347813	5.78243	16.1953	0.578584	2.1424	17.6025	4.37031	7.73031	0.208615	0.30721	117.831	5.0674	4.56106	0.0633967	11.751	0.181531	0.830071	0.923436	0.533943	0.0636733	1.55398	22.9845	0.767172	0.812978	3.14457	0.00277629	0.57484	0.0255727	0.0299527	0	0
21	0.181106	1.2788	0.699204	3.5672	0.413062	1.13532	4.56661e-06	0.533901	2.19969	2.34929	24.7789	0.249574	23.4951	0.175142	1.92915	0.726848	32.0591	0.960218	0.0586703	5.0674	102.432	0.0175822	3.53294	1.39785	6.30231	0.0632553	0.964562	0.507161	0.00248723	5.15669	20.4005	0.806621	0.210564	0.112154	0.10844	0.150173	0.891688	0.221215	0	0
22	0.186535	0.767782	7.06024	1.0221	10.2889	4.14986	0.0098423	0.0775977	0.374241	1.33736	0.991025	7.37655	5.59726	0.072729	30.5508	2.00577	24.1583	18.5459	8.3106	4.56106	0.0175822	92.8737	10.9729	0.0626166	0.291911	1.6109	2.51385	9.56831	2.46328	0.0231997	0.598208	1.07668	0.0358639	0.114294	0.043811	0.0538931	0.00762055	0.02777	0	0
23	0.256292	29.0675	1.10344	1.31896	4.10827	19.1421	1.98385	6.90346	1.06792	9.18174	0.00252512	2.7279	0.616199	4.65971	3.772	1.2267	49.9589	12.7345	0.235814	0.0633967	3.53294	10.9729	168.379	4.70535	0.964233	8.48724	1.34388	8.75723	0.00510387	0.347926	4.40199	2.56145	0.554934	0.841658	0.49399	0.677661	0.334758	0.0389676	0	0
24	2.86438	2.17972	0.538676	2.28774	0.0606721	7.21612	0.919573	0.0305662	5.03468	0.506438	1.10187	5.20451	2.29337	1.32958	20.821	1.29695	5.22233	0.517172	3.36837	11.751	1.39785	0.0626166	4.70535	31.8358	5.0466	0.766772	0.737199	0.351443	0.116245	0.0954434	0.791437	0.0583567	0.0553219	1.93469	0.314586	1.39365	0.449811	0.0653473	0	0
25	0.369855	0.102257	0.124819	1.65609	1.91159	1.00917	0.0817075	0.0759857	3.8291	2.32261	0.541553	1.18533	5.08336	0.442723	0.156828	0.057297	0.322708	1.13648	0.257338	0.181531	6.30231	0.291911	0.964233	5.0466	7.31973	0.484504	0.0275624	0.0167	0.0269248	0.000757526	0.291616	0.0414944	0.101611	0.85979	0.203555	0.332086	1.66303	0.215119	0	0
26	3.91192	0.44496	6.73051	0.000998184	15.3046	0.451597	8.98386	1.72393	0.234773	8.62086	3.77737	0.365207	4.43287	0.404153	13.2366	1.22063	12.8485	8.43428	7.9777	0.830071	0.0632553	1.6109	8.48724	0.766772	0.484504	39.0725	2.58235	7.32099	0.264869	0.205518	2.85642	2.25075	0.361325	0.0131755	0.0107037	1.2503	1.03508	0.288328	0	0
27	0.119969	0.345539	2.52543	0.231182	1.17922	9.54727	2.49373	0.873289	1.53199	5.93634e-05	2.21516	0.067487	4.99298	0.414561	0.0994012	0.146939	0.191591	1.49243	0.82568	0.923436	0.964562	2.51385	1.34388	0.737199	0.0275624	2.58235	20.8604	0.116971	0.0593349	0.0114653	1.0615	0.307241	0.101888	0.308324	0.0204366	0.259934	0.0329005	0.0248021	0	0
28	0.274988	0.121194	1.89492	0.0441602	3.98479	1.34241	2.89548	0.481784	0.113659	3.48727	0.439569	1.12182e-07	1.03091	1.36347	5.9106	0.00176689	5.51225	4.96616	3.16206	0.533943	0.507161	9.56831	8.75723	0.351443	0.0167	7.32099	0.116971	8.80648	0.084369	0.00928294	0.0495351	1.53256	0.227207	0.0693766	0.051314	0.90284	0.125778	0.0967695	0	0
29	0.0223875	0.586485	14.1094	0.370341	0.0421315	1.976	0.516818	0.508305	1.17374	4.44665	3.45116	0.285894	3.61734	0.418442	14.7647	1.01242	0.171613	1.15684	0.540262	0.0636733	0.00248723	2.46328	0.00510387	0.116245	0.0269248	0.264869	0.0593349	0.084369	10.4502	0.747575	2.63572	9.78236e-05	0.955838	0.0314672	9.79812e-07	0.143253	0.321234	0.100231	0	0
30	0.00722691	0.0707626	0.864653	0.280241	0.704835	3.99937e-05	0.235353	0.462932	3.9043	0.917391	0.639251	0.142182	0.41162	0.0205878	1.74153	1.15328	0.505278	1.98007	0.216259	1.55398	5.15669	0.0231997	0.347926	0.0954434	0.000757526	0.205518	0.0114653	0.00928294	0.747575	4.82229	11.2505	0.620645	0.842529	0.0747064	0.149826	0.224267	1.65542	0.453268	0	0
31	3.0924	1.72217	4.16516	2.75933	14.385	0.949439	0.404906	1.12675	11.0818	3.02681	6.66238	0.851759	2.19561	1.41025	9.54502	4.56266	2.21621	0.502958	0.0189697	22.9845	20.4005	0.598208	4.40199	0.791437	0.291616	2.85642	1.0615	0.0495351	2.63572	11.2505	102.376	1.97722	2.81342	3.46881	0.0111611	0.0124354	0.347702	0.142165	0	0
32	0.378303	0.0850699	0.881118	0.541894	0.255792	0.311687	0.0918122	0.597829	2.53998	0.232169	0.0338152	0.16723	0.0153843	0.36177	2.67675	0.57306	1.12467	1.27328	1.01753	0.767172	0.806621	1.07668	2.56145	0.0583567	0.0414944	2.25075	0.307241	1.53256	9.78236e-05	0.620645	1.97722	2.04239	0.0348505	0.253158	0.0484144	0.47333	0.138411	0.0251378	0	0
33	0.0739482	0.145516	0.0973681	0.0299421	0.166327	0.04928	0.0256636	1.16539	0.762499	0.2778	9.2645e-05	0.0557018	0.0502075	0.0727138	3.0106	0.0414716	0.588413	1.87055	0.0428379	0.812978	0.210564	0.0358639	0.554934	0.0553219	0.101611	0.361325	0.101888	0.227207	0.955838	0.842529	2.81342	0.0348505	0.858808	0.152368	0.163652	0.313441	0.762721	0.190922	0	0
34	0.317322	0.261111	0.282649	0.420499	1.17364	0.0321965	0.615501	0.556143	0.418856	0.458579	0.246337	1.74007	0.252504	0.0144253	0.452545	0.0943785	0.702914	1.52907	1.02242	3.14457	0.112154	0.114294	0.841658	1.93469	0.85979	0.0131755	0.308324	0.0693766	0.0314672	0.0747064	3.46881	0.253158	0.152368	3.22897	0.527654	1.43504	2.13151	0.491437	0	0
35	0.0272426	0.112181	0.318004	0.0304254	0.00179103	0.0167422	0.00680763	0.392415	0.0580838	0.317305	0.0873372	0.0717635	0.0583937	0.00252344	0.000549565	0.345166	0.351445	1.43842	0.0275824	0.00277629	0.10844	0.043811	0.49399	0.314586	0.203555	0.0107037	0.0204366	0.051314	9.79812e-07	0.149826	0.0111611	0.0484144	0.163652	0.527654	0.29749	0.337601	0.703387	0.130401	0	0
36	0.077768	0.0173759	2.27411	0.165891	0.0291951	0.151761	0.41873	1.17598	0.636182	4.37296	0.638659	0.631927	0.615829	1.51477	0.799703	0.00464539	2.30302	0.889286	0.279177	0.57484	0.150173	0.0538931	0.677661	1.39365	0.332086	1.2503	0.259934	0.90284	0.143253	0.224267	0.0124354	0.47333	0.313441	1.43504	0.337601	2.71312	1.41084	0.405935	0	0
37	0.338128	0.0031381	0.00992788	0.496731	0.757618	0.212045	0.081775	2.08695	0.868914	1.99784	0.602829	3.58644	1.78607	0.252564	5.20751	0.0102411	1.11878	6.15983	0.257024	0.0255727	0.891688	0.00762055	0.334758	0.449811	1.66303	1.03508	0.0329005	0.125778	0.321234	1.65542	0.347702	0.138411	0.762721	2.13151	0.703387	1.41084	6.25139	1.13589	0	0
38	0.0984448	0.00317044	0.000451469	0.101194	0.0917377	0.0435067	0.18863	0.415728	0.308837	0.50767	0.0654508	0.656012	0.48818	0.10359	0.827479	0.028534	0.415858	1.31242	0.0460326	0.0299527	0.221215	0.02777	0.0389676	0.0653473	0.215119	0.288328	0.0248021	0.0967695	0.100231	0.453268	0.142165	0.0251378	0.190922	0.491437	0.130401	0.405935	1.13589	0.255935	0	0
39-dimensional	16.1242	0.385928	2.5607	0.621065	-0.489213	2.33534	2.67403	3.03745	-1.05161	0.911907	-1.66514	-0.419353	5.46296	-3.21769	0.717563	1.62534	1.94292	3.42279	0.890053	-2.94836	-0.275811	-0.496037	-0.292235	-1.09163	0.667266	2.33116	0.111241	0.453218	0.264666	0.355132	1.32026	-0.113317	-0.818881	-0.53018	0.363855	0.373246	0.33131	0.0345919	-0.409055	0
2	0.385928	14.7175	3.76453	3.57976	-0.739128	-2.15415	2.63139	-1.39419	-1.6519	0.473517	0.514407	3.05341	-0.0852335	-2.95439	-1.70475	-2.24324	-5.47138	1.53129	1.94589	-0.644237	1.69524	0.634502	6.19802	0.787979	-0.0970091	1.99857	-0.298311	-0.616375	2.3272	1.92482	-2.96403	2.18265	-2.4428	0.635864	1.65841	2.32587	-0.886851	1.25656	-1.54164	0
3	2.5607	3.76453	19.143	0.722837	1.21413	-0.308858	0.752291	3.02047	-1.22586	2.76166	-0.76549	5.18236	-2.02081	-3.39657	-5.87562	0.966529	-1.17006	1.79878	-0.141381	1.86703	1.12211	2.53465	-0.641832	0.413177	-0.240444	3.26887	1.14025	1.24067	4.54723	-0.0895192	1.20412	0.0192868	-1.3563	-0.468387	1.57374	-0.262957	-0.378016	0.643846	-0.780993	0
4	0.621065	3.57976	0.722837	13.7014	-0.798474	-1.65194	-0.0244991	1.34685	2.69661	1.16185	-1.00521	-1.26693	6.84512	-1.4849	2.7237	0.844371	-0.291778	-3.42176	-1.20611	-2.09209	2.0802	-1.09301	1.42213	2.2808	-1.21131	0.483362	-0.78147	0.119131	-0.0787993	0.0334364	1.10072	-0.0945472	-0.872424	-0.606091	0.50189	0.426568	0.384887	0.127329	-0.523062	0
5	-0.489213	-0.739128	1.21413	-0.798474	10.4154	-0.991813	1.1944	-1.29058	0.487981	-4.66005	-0.763791	2.11552	-4.05887	1.63318	-5.16963	-1.07778	-1.69834	4.21384	1.96157	-2.1739	-0.670413	3.2195	1.98728	0.135126	1.37166	-3.97749	1.12943	-1.98302	-0.28193	-0.921	3.87387	0.412903	-0.306612	-1.08948	-0.140203	0.0501822	-0.824114	0.238415	0.0757017	0
6	2.33534	-2.15415	-0.308858	-1.65194	-0.991813	15.3115	0.387762	1.88698	-1.64624	4.29575	1.05791	-2.1877	0.885998	-0.970938	-4.51823	2.17091	2.43388	-0.521174	-0.201561	-1.6302	1.24854	-2.11551	-4.1136	3.42057	-0.932336	-0.240225	-3.37722	1.07164	1.91203	0.531595	-1.51001	1.1715	-0.89044	0.219928	0.775795	0.407415	-0.766238	0.634319	-0.499925	0
7	2.67403	2.63139	0.752291	-0.0244991	1.1944	0.387762	10.6115	0.822669	-2.27031	0.894759	0.930396	3.56173	0.663836	0.119077	-0.821267	-5.20519	0.668952	1.18927	0.793506	0.376498	-0.00684559	0.101225	-1.41522	-0.977835	-0.287704	2.9862	1.58655	1.70385	-0.731927	0.471292	0.650103	-0.318781	0.177396	-0.78558	-0.0991384	-0.667597	0.293829	-0.445268	0.0128616	0
8	3.03745	-1.39419	3.02047	1.34685	-1.29058	1.88698	0.822669	7.69477	0.401315	2.98929	0.117686	0.381551	2.70786	-1.75532	3.19672	0.909369	2.94332	-1.23825	0.126664	0.452736	-0.68626	0.259537	-2.56395	0.00340155	-0.258121	1.41779	0.86475	0.672993	-0.590056	0.81096	-1.1915	-0.624351	0.917279	-0.735921	0.783331	-0.890974	1.37041	-0.541431	-0.121346	0
9	-1.05161	-1.6519	-1.22586	2.69661	0.487981	-1.64624	-2.27031	0.401315	12.7025	-2.48149	2.7243	-0.00320081	1.53036	0.856246	6.66938	3.98053	0.477379	-4.49099	-4.70652	-0.402003	-1.28038	-0.698591	1.32316	-1.43036	2.03684	0.962866	0.9194	0.240769	1.6443	-1.38002	2.73557	-0.914418	-1.61372	0.69205	0.47508	1.68051	-1.27087	1.02736	-0.553818	0
10	0.911907	0.473517	2.76166	1.16185	-4.66005	4.29575	0.894759	2.98929	-2.48149	12.8388	-1.188	-2.76553	-1.16746	-1.63483	-1.6222	-1.42894	0.609197	-0.386001	-0.340783	0.699631	1.4497	1.19201	-3.14881	0.378483	-1.55679	2.74022	0.138084	1.90689	1.87898	0.713741	-1.49675	-0.760063	0.830356	-0.695558	0.270013	-2.45277	1.55218	-0.905674	0.226826	0
11	-1.66514	0.514407	-0.76549	-1.00521	-0.763791	1.05791	0.930396	0.117686	2.7243	-1.188	10.5238	3.28991	-1.86194	-0.0393858	1.35261	0.331171	3.04234	-1.63025	-1.18826	2.29994	-4.89869	0.961602	0.163367	-0.732142	0.767144	2.13028	-1.61261	0.625381	2.0767	1.03216	-2.8128	0.0813027	-0.279457	0.513836	0.575076	-0.454494	0.644192	-0.0717171	-0.216201	0
12	-0.419353	3.05341	5.18236	-1.26693	2.11552	-2.1877	3.56173	0.381551	-0.00320081	-2.76553	3.28991	16.0393	-3.56529	1.44197	-3.64857	-2.97041	-4.81581	5.68046	0.54748	3.82741	0.648407	2.65224	1.86434	-1.68422	1.14747	-0.253196	-0.493461	-0.0710726	0.946433	0.0603651	-1.35847	0.907597	-0.779595	1.35205	0.257767	1.44304	-2.14243	1.15615	-0.406538	0
13	5.46296	-0.0852335	-2.02081	6.84512	-4.05887	0.885998	0.663836	2.70786	1.53036	-1.16746	-1.86194	-3.56529	21.1743	0.40142	9.49813	3.17153	-0.245612	-3.18991	-1.28018	-0.972405	5.00722	-2.4344	-0.556264	-0.872295	-2.19146	2.48301	1.98322	0.939274	-1.45918	1.11195	1.01339	0.412181	-0.360449	-0.467089	0.323593	1.48166	1.06908	-0.326418	-0.437155	0
14	-3.21769	-2.95439	-3.39657	-1.4849	1.63318	-0.970938	0.119077	-1.75532	0.856246	-1.63483	-0.0393858	1.44197	0.40142	6.97309	-0.675535	-0.0352193	1.36562	0.485694	-1.55034	-1.23071	0.242412	0.345101	-2.41029	0.446607	-0.734876	-1.05115	0.920333	-1.08399	-1.13401	-0.661021	1.70286	0.0115009	0.373466	0.0811457	-0.571676	0.46398	-0.208389	-0.0877506	0.480982	0
15	0.717563	-1.70475	-5.87562	2.7237	-5.16963	-4.51823	-0.821267	3.19672	6.66938	-1.6222	1.35261	-3.64857	9.49813	-0.675535	21.2844	1.62402	2.38009	-8.18992	-3.6891	3.94399	-1.19883	-5.6087	-1.67047	-3.80027	0.471052	4.08672	0.0167934	2.34082	-3.31655	1.87842	-3.64587	-0.999122	1.04077	0.714777	0.647995	1.72211	1.9644	-0.467434	-0.519287	0
16	1.62534	-2.24324	0.966529	0.844371	-1.07778	2.17091	-5.20519	0.909369	3.98053	-1.42894	0.331171	-2.97041	3.17153	-0.0352193	1.62402	7.86601	1.30649	-2.33454	-1.60275	-2.14108	0.89076	-1.43262	-1.05296	1.29212	-0.224288	-1.01468	-0.443313	0.0238757	1.11188	-0.961615	2.02423	-0.628998	-0.343186	-0.298758	0.722447	0.234529	0.0373712	0.257794	-0.104361	0
17	1.94292	-5.47138	-1.17006	-0.291778	-1.69834	2.43388	0.668952	2.94332	0.477379	0.609197	3.04234	-4.81581	-0.245612	1.36562	2.38009	1.30649	14.023	-5.5089	-1.89312	-2.77953	-5.66269	-4.91485	-7.06904	2.28278	0.567832	3.58303	0.438675	2.34811	-0.415961	0.709024	-1.4869	-1.06256	0.769324	-0.838535	0.590659	-1.52024	1.05875	-0.646299	0.0016776	0
18	3.42279	1.53129	1.79878	-3.42176	4.21384	-0.521174	1.18927	-1.23825	-4.49099	-0.386001	-1.63025	5.68046	-3.18991	0.485694	-8.18992	-2.33454	-5.5089	18.7221	5.3875	0.940664	0.614169	4.46314	3.04587	-2.18649	0.921699	-3.76703	-0.647418	-2.05466	0.0637671	-2.48209	1.77954	-0.0969901	-0.0319018	1.15563	-2.49106	-0.649604	-1.8709	0.294853	0.999011	0
19	0.890053	1.94589	-0.141381	-1.20611	1.96157	-0.201561	0.793506	0.126664	-4.70652	-0.340783	-1.18826	0.54748	-1.28018	-1.55034	-3.6891	-1.60275	-1.89312	5.3875	8.78855	0.316673	0.421787	2.8059	0.74223	2.55574	-0.436409	-2.40085	-1.1906	-1.86356	-0.238259	0.992802	-0.66324	1.61036	-0.448859	-0.971418	0.800281	0.253564	0.206992	0.203148	-0.490488	0
20	-2.94836	-0.644237	1.86703	-2.09209	-2.1739	-1.6302	0.376498	0.452736	-0.402003	0.699631	2.29994	3.82741	-0.972405	-1.23071	3.94399	-2.14108	-2.77953	0.940664	0.316673	11.019	-2.37505	2.18876	-0.42894	-3.9253	0.377137	0.618637	-0.766331	0.789629	-0.0905939	0.882257	-4.43145	0.460562	1.35439	1.74587	-0.490495	0.218393	0.0471704	-0.11528	0.338596	0
21	-0.275811	1.69524	1.12211	2.0802	-0.670413	1.24854	-0.00684559	-0.68626	-1.28038	1.4497	-4.89869	0.648407	5.00722	0.242412	-1.19883	0.89076	-5.66269	0.614169	0.421787	-2.37505	10.2146	0.0924723	-1.74572	1.55818	-2.47346	-0.0304819	0.835028	0.667625	0.309052	-1.99548	4.24252	-0.584229	-0.801042	-0.314166	0.0015808	0.795483	-1.1008	0.688263	-0.255904	0
22	-0.496037	0.634502	2.53465	-1.09301	3.2195	-2.11551	0.101225	0.259537	-0.698591	1.19201	0.961602	2.65224	-2.4344	0.345101	-5.6087	-1.43262	-4.91485	4.46314	2.8059	2.18876	0.0924723	9.65429	3.2552	0.0892478	-0.556126	-1.36388	1.64851	-3.0742	1.45848	0.0343813	0.890868	0.90319	-0.0428273	-0.346952	0.0675938	-0.406878	-0.0202625	0.0733054	0.109603	0
23	-0.292235	6.19802	-0.641832	1.42213	1.98728	-4.1136	-1.41522	-2.56395	1.32316	-3.14881	0.163367	1.86434	-0.556264	-2.41029	-1.67047	-1.05296	-7.06904	3.04587	0.74223	-0.42894	-1.74572	3.2552	13.1674	-1.63202	1.0348	-2.59742	0.949042	-3.0229	0.298957	0.983363	-2.48992	2.04904	-1.23394	0.947042	-0.229972	1.40623	-0.802255	0.508847	-0.365717	0
24	-1.09163	0.787979	0.413177	2.2808	0.135126	3.42057	-0.977835	0.00340155	-1.43036	0.378483	-0.732142	-1.68422	-0.872295	0.446607	-3.80027	1.29212	2.28278	-2.18649	2.55574	-3.9253	1.55818	0.0892478	-1.63202	7.15033	-2.09811	0.0110981	-1.44875	-0.771471	0.698886	0.795781	-0.21037	1.01777	-1.13758	-1.30777	1.88839	0.456222	0.0427551	0.618699	-1.02669	0
25	0.667266	-0.0970091	-0.240444	-1.21131	1.37166	-0.932336	-0.287704	-0.258121	2.03684	-1.55679	0.767144	1.14747	-2.19146	-0.734876	0.471052	-0.224288	0.567832	0.921699	-0.436409	0.377137	-2.47346	-0.556126	1.0348	-2.09811	2.7201	-0.608825	0.107961	-0.146803	0.266386	0.0811587	-0.648232	0.327595	-0.453819	0.93543	-0.320571	0.737292	-1.35136	0.549825	-0.101006	0
26	2.33116	1.99857	3.26887	0.483362	-3.97749	-0.240225	2.9862	1.41779	0.962866	2.74022	2.13028	-0.253196	2.48301	-1.05115	4.08672	-1.01468	3.58303	-3.76703	-2.40085	0.618637	-0.0304819	-1.36388	-2.59742	0.0110981	-0.608825	6.77224	1.25995	2.60068	1.12611	1.10295	-2.33693	-0.75972	-0.206139	0.163687	0.884077	-0.155709	0.648147	-0.0228289	-0.603726	0
27	0.111241	-0.298311	1.14025	-0.78147	1.12943	-3.37722	1.58655	0.86475	0.9194	0.138084	-1.61261	-0.493461	1.98322	0.920333	0.0167934	-0.443313	0.438675	-0.647418	-1.1906	-0.766331	0.835028	1.64851	0.949042	-1.44875	0.107961	1.25995	4.79827	0.411921	-0.650516	-0.539397	1.46076	-1.04712	0.856426	-0.587814	-0.376552	-1.15036	0.064347	-0.499647	0.401785	0
28	0.453218	-0.616375	1.24067	0.119131	-1.98302	1.07164	1.70385	0.672993	0.240769	1.90689	0.625381	-0.0710726	0.939274	-1.08399	2.34082	0.0238757	2.34811	-2.05466	-1.86356	0.789629	0.667625	-3.0742	-3.0229	-0.771471	-0.146803	2.60068	0.411921	2.98873	0.167281	-0.227218	-0.0922547	-1.38715	0.639288	-0.273246	0.0692636	-1.14408	0.429038	-0.414655	0.121626	0
29	0.264666	2.3272	4.54723	-0.0787993	-0.28193	1.91203	-0.731927	-0.590056	1.6443	1.87898	2.0767	0.946433	-1.45918	-1.13401	-3.31655	1.11188	-0.415961	0.0637671	-0.238259	-0.0905939	0.309052	1.45848	0.298957	0.698886	0.266386	1.12611	-0.650516	0.167281	3.94969	-0.102873	0.864997	0.858477	-1.92427	0.234734	0.916366	0.750122	-0.999756	0.91948	-0.707947	0
30	0.355132	1.92482	-0.0895192	0.0334364	-0.921	0.531595	0.471292	0.81096	-1.38002	0.713741	1.03216	0.0603651	1.11195	-0.661021	1.87842	-0.961615	0.709024	-2.48209	0.992802	0.882257	-1.99548	0.0343813	0.983363	0.795781	0.0811587	1.10295	-0.539397	-0.227218	-0.102873	3.00526	-4.16001	1.71037	-0.0877713	-0.212403	1.35957	0.725468	0.826633	-0.0327429	-0.752124	0
31	1.32026	-2.96403	1.20412	1.10072	3.87387	-1.51001	0.650103	-1.1915	2.73557	-1.49675	-2.8128	-1.35847	1.01339	1.70286	-3.64587	2.02423	-1.4869	1.77954	-0.66324	-4.43145	4.24252	0.890868	-2.48992	-0.21037	-0.648232	-2.33693	1.46076	-0.0922547	0.864997	-4.16001	10.9205	-2.32475	-0.67596	-1.92314	-0.862693	-1.0824	-0.13163	-0.260723	0.748909	0
32	-0.113317	2.18265	0.0192868	-0.0945472	0.412903	1.1715	-0.318781	-0.624351	-0.914418	-0.760063	0.0813027	0.907597	0.412181	0.0115009	-0.999122	-0.628998	-1.06256	-0.0969901	1.61036	0.460562	-0.584229	0.90319	2.04904	1.01777	0.327595	-0.75972	-1.04712	-1.38715	0.858477	1.71037	-2.32475	2.4808	-1.3331	0.572597	0.888577	2.05485	-0.896418	0.888705	-0.857393	0
33	-0.818881	-2.4428	-1.3563	-0.872424	-0.306612	-0.89044	0.177396	0.917279	-1.61372	0.830356	-0.279457	-0.779595	-0.360449	0.373466	1.04077	-0.343186	0.769324	-0.0319018	-0.448859	1.35439	-0.801042	-0.0428273	-1.23394	-1.13758	-0.453819	-0.206139	0.856426	0.639288	-1.92427	-0.0877713	-0.67596	-1.3331	2.17642	-0.466049	-0.803941	-2.04985	1.44496	-1.23288	0.934633	0
34	-0.53018	0.635864	-0.468387	-0.606091	-1.08948	0.219928	-0.78558	-0.735921	0.69205	-0.695558	0.513836	1.35205	-0.467089	0.0811457	0.714777	-0.298758	-0.838535	1.15563	-0.971418	1.74587	-0.314166	-0.346952	0.947042	-1.30777	0.93543	0.163687	-0.587814	-0.273246	0.234734	-0.212403	-1.92314	0.572597	-0.466049	1.80152	-0.65319	1.2882	-1.4946	0.749242	-0.056619	0
35	0.363855	1.65841	1.57374	0.50189	-0.140203	0.775795	-0.0991384	0.783331	0.47508	0.270013	0.575076	0.257767	0.323593	-0.571676	0.647995	0.722447	0.590659	-2.49106	0.800281	-0.490495	0.0015808	0.0675938	-0.229972	1.88839	-0.320571	0.884077	-0.376552	0.0692636	0.916366	1.35957	-0.862693	0.888577	-0.803941	-0.65319	1.71405	0.859814	0.285913	0.408571	-0.903807	0
36	0.373246	2.32587	-0.262957	0.426568	0.0501822	0.407415	-0.667597	-0.890974	1.68051	-2.45277	-0.454494	1.44304	1.48166	0.46398	1.72211	0.234529	-1.52024	-0.649604	0.253564	0.218393	0.795483	-0.406878	1.40623	0.456222	0.737292	-0.155709	-1.15036	-1.14408	0.750122	0.725468	-1.0824	2.05485	-2.04985	1.2882	0.859814	3.42364	-1.86932	1.58611	-1.11435	0
37	0.33131	-0.886851	-0.378016	0.384887	-0.824114	-0.766238	0.293829	1.37041	-1.27087	1.55218	0.644192	-2.14243	1.06908	-0.208389	1.9644	0.0373712	1.05875	-1.8709	0.206992	0.0471704	-1.1008	-0.0202625	-0.802255	0.0427551	-1.35136	0.648147	0.064347	0.429038	-0.999756	0.826633	-0.13163	-0.896418	1.44496	-1.4946	0.285913	-1.86932	2.76174	-1.42985	0.427508	0
38	0.0345919	1.25656	0.643846	0.127329	0.238415	0.634319	-0.445268	-0.541431	1.02736	-0.905674	-0.0717171	1.15615	-0.326418	-0.0877506	-0.467434	0.257794	-0.646299	0.294853	0.203148	-0.11528	0.688263	0.0733054	0.508847	0.618699	0.549825	-0.0228289	-0.499647	-0.414655	0.91948	-0.0327429	-0.260723	0.888705	-1.23288	0.749242	0.408571	1.58611	-1.42985	1.01283	-0.595268	0
39	-0.409055	-1.54164	-0.780993	-0.523062	0.0757017	-0.499925	0.0128616	-0.121346	-0.553818	0.226826	-0.216201	-0.406538	-0.437155	0.480982	-0.519287	-0.104361	0.0016776	0.999011	-0.490488	0.338596	-0.255904	0.109603	-0.365717	-1.02669	-0.101006	-0.603726	0.401785	0.121626	-0.707947	-0.752124	0.748909	-0.857393	0.934633	-0.056619	-0.903807	-1.11435	0.427508	-0.595268	0.699	0
40-dimensional	262.252	0.0322962	8.03688	0.340072	0.153309	6.14881	7.41081	9.54895	0.93684	1.15428	3.36605	0.148835	32.3489	10.9142	0.235709	2.07042	3.83701	11.0128	0.927746	13.6155	0.183731	0.309963	0.20002	2.04161	0.105285	6.18372	0.189444	0.0478325	0.216681	0.118538	2.1053	0.00666896	0.627638	1.18603	0.487558	0.00182479	0.112262	0.176659	0.0511146	0.0623597
2	0.0322962	372.045	2.39749	15.1017	2.33588	11.026	5.0244	3.31235	5.4211	0.704557	3.55101	7.74063	3.6123	5.10581	0.029088	0.542603	31.3591	5.63394	1.83554	28.6048	8.58631	1.26579	55.5111	12.3416	7.1453	0.549931	8.50677	1.63509	0.496099	4.04976	16.1623	0.368463	7.06558	26.5441	1.08965	24.9687	0.84111	3.46113	9.12171	4.07223
3	8.03688	2.39749	408.746	0.329841	2.54969	0.0658687	0.886074	10.413	0.80624	11.5477	2.04409	28.237	1.3011	13.9385	46.034	0.0557271	1.22709	1.93323	0.0210796	1.07825	0.273878	5.27532	1.56029	0.82453	2.50739	15.0412	5.80667	0.103598	28.4521	0.017419	2.94535	0.613419	1.56728	7.06505	8.31688	2.42721	0.132016	4.64429	0.00411253	0.95724
4	0.340072	15.1017	0.329841	188.291	0.724824	2.99327	0.00256311	1.73794	7.02929	1.15318	0.834287	1.65149	45.2049	2.06882	8.11893	0.893669	0.0902358	11.3253	1.55182	2.85774	4.67841	1.12388	2.26825	6.06847	1.052	0.159299	0.915737	0.0605815	0.0351781	0.00154494	1.06076	0.0400566	0.786509	0.092068	0.102908	0.366715	0.14658	0.00665206	0.387072	0.0182895
5	0.153309	2.33588	2.54969	0.724824	111.338	0.624763	1.59194	1.48125	0.365753	19.6547	1.00068	4.67577	14.0282	2.28983	30.1778	1.79001	2.80946	16.5519	4.25856	10.2951	0.780842	9.82697	3.13647	0.11249	0.798115	14.141	2.50121	5.33718	2.96553e-06	0.876323	16.4531	0.469168	0.0725948	3.49416	0.106525	0.168922	0.670576	0.60311	0.109559	0.121404
6	6.14881	11.026	0.0658687	2.99327	0.624763	243.645	0.237411	3.98257	2.17159	21.4441	0.501712	4.48802	1.82044	1.31844	24.9676	3.19143	6.08453	0.541859	0.00257406	9.98157	0.871223	5.0207	19.6535	7.4267	2.68696	0.0064853	7.33916	0.345812	5.41094	0.259332	1.53882	2.4761	0.698054	0.869572	2.14725	0.0751638	0.575343	2.04403	0.0150377	0.265163
7	7.41081	5.0244	0.886074	0.00256311	1.59194	0.237411	113.311	0.737858	4.89567	1.01353	0.661851	12.8513	0.670232	0.00357787	0.962792	28.4483	0.462286	1.24865	0.712203	0.0181265	0.0125853	0.00352625	2.31666	1.46475	0.27455	9.56921	3.27565	2.37841	0.35225	0.215131	0.547883	0.0339991	0.0383225	1.37075	0.0172528	0.801773	0.0878596	0.0321875	0.0193141	0.0296259
8	9.54895	3.31235	10.413	1.73794	1.48125	3.98257	0.737858	59.8215	0.215599	9.682	9.86811e-05	0.165499	8.27695	3.31254	9.13269	0.591397	8.73376	1.73373	0.0330233	0.011128	0.642088	0.045727	7.1858	0.0627235	0.266422	2.35587	1.22911	0.246473	0.192618	0.64449	1.19488	0.228079	0.8786	1.33777	1.07134	1.29911	1.88577	0.0630398	0.000268516	0.0353364
9	0.93684	5.4211	0.80624	7.02929	0.365753	2.17159	4.89567	0.215599	163.907	5.2313	6.35826	0.0013642	3.23642	0.567653	40.8559	14.1194	0.246414	21.3041	21.3357	1.66104	2.14079	0.594731	1.29459	3.3622	2.64683	1.31993	1.70791	0.00157407	3.55118	1.9404	8.36293	0.464099	2.50227	0.000562474	0.765582	1.65184	1.60375	2.21601	0.112233	0.0891797
10	1.15428	0.704557	11.5477	1.15318	19.6547	21.4441	1.01353	9.682	5.2313	174.661	2.50116	7.22335	0.417365	3.36501	4.66924	3.46587	0.41747	0.394302	0.0292453	1.04368	1.19896	1.10482	12.3102	0.163406	5.53393	9.61785	0.79235	1.8566	5.49953	0.47415	1.42415	0.094554	0.796023	3.97104	1.0945	10.3681	2.43632	0.000108031	0.424469	0.335959
11	3.36605	3.55101	2.04409	0.834287	1.00068	0.501712	0.661851	9.86811e-05	6.35826	2.50116	119.562	10.2953	5.78907	0.028513	3.66599	0.61268	9.0229	1.89832	1.86436	16.7776	20.5076	1.22907	0.29029	0.00716102	2.55168	3.07486	5.74744	1.42415	2.52903	1.12024	9.79293	0.152842	0.118331	3.48737	0.0551566	0.119758	0.403377	1.01192	0.434757	0.365822
12	0.148835	7.74063	28.237	1.65149	4.67577	4.48802	12.8513	0.165499	0.0013642	7.22335	10.2953	257.777	11.9548	1.96209	14.1364	9.36241	23.1186	31.7023	0.339366	12.0536	0.330773	6.8808	3.20415	3.40738	0.966505	0.0319023	0.114313	0.0336787	1.08728	0.00304357	1.6791	1.00218	0.588011	1.17522	0.174813	1.65009	4.5823	1.79855	0.101638	0.0143369
13	32.3489	3.6123	1.3011	45.2049	14.0282	1.82044	0.670232	8.27695	3.23642	0.417365	5.78907	11.9548	479.405	0.0157452	76.6209	6.62117	0.0378535	12.4217	1.09293	11.2386	20.4008	6.91286	1.11034	3.82038	10.8347	8.89372	9.13918	0.0348304	0.663656	1.1603	2.05313	1.07735	0.0755887	5.11095	1.9511	0.17712	1.16878	0.830846	0.0225211	0.642328
14	10.9142	5.10581	13.9385	2.06882	2.28983	1.31844	0.00357787	3.31254	0.567653	3.36501	0.028513	1.96209	0.0157452	50.1079	0.152478	0.0375547	1.81192	0.376659	2.6902	0.102285	0.185016	0.176122	4.92793	0.741019	0.0984821	1.54311	0.272841	0.633502	1.9063	0.419526	2.37874	0.0519837	0.116102	0.589245	0.965163	0.756859	0.0453649	0.315323	0.0656568	0.0940875
15	0.235709	0.029088	46.034	8.11893	30.1778	24.9676	0.962792	9.13269	40.8559	4.66924	3.66599	14.1364	76.6209	0.152478	486.369	5.02718	5.41657	61.5338	15.4574	40.9928	0.479062	29.2403	1.33769	7.19451	2.58415	12.7521	1.11815	9.72386	15.8592	3.66476	16.6398	2.70786	0.907123	6.59281	0.212211	7.94076	3.81024	3.04932	1.26765	0.685441
16	2.07042	0.542603	0.0557271	0.893669	1.79001	3.19143	28.4483	0.591397	14.1194	3.46587	0.61268	9.36241	6.62117	0.0375547	5.02718	69.9332	1.59801	4.23086	3.23127	0.0275109	1.68436	1.61523	0.409736	4.79756	0.474388	2.04205	1.70652	0.420571	0.3329	0.870017	2.80927	1.31869	0.171526	1.41572	0.028308	1.24304	0.000750432	0.59227	0.350124	0.442419
17	3.83701	31.3591	1.22709	0.0902358	2.80946	6.08453	0.462286	8.73376	0.246414	0.41747	9.0229	23.1186	0.0378535	1.81192	5.41657	1.59801	196.747	30.6095	3.52123	8.69103	32.4606	24.2915	50.4705	4.86707	0.240032	13.0927	0.26246	5.26618	0.137138	0.499229	2.12341	1.03684	0.601213	0.932272	0.444427	2.54517	1.12276	0.312082	0.0018713	0.0032206
18	11.0128	5.63394	1.93323	11.3253	16.5519	0.541859	1.24865	1.73373	21.3041	0.394302	1.89832	31.7023	12.4217	0.376659	61.5338	4.23086	30.6095	356.353	27.8634	4.1818	0.708541	20.7347	10.7366	2.83697	2.05106	15.9893	1.27669	2.90855	0.0553586	6.08089	2.51192	0.150032	0.00512362	3.95159	8.93425	0.0247771	3.52119	0.078134	0.527872	0.138281
19	0.927746	1.83554	0.0210796	1.55182	4.25856	0.00257406	0.712203	0.0330233	21.3357	0.0292453	1.86436	0.339366	1.09293	2.6902	15.4574	3.23127	3.52123	27.8634	78.5879	0.209973	0.0686908	7.52113	0.336704	4.8548	0.631401	5.01001	0.725949	4.44627	0.000806957	0.963298	0.277372	3.29098	0.177254	2.41931	1.32184	0.00843133	0.0444816	0.367482	0.089577	0.0680921
20	13.6155	28.6048	1.07825	2.85774	10.2951	9.98157	0.0181265	0.011128	1.66104	1.04368	16.7776	12.0536	11.2386	0.102285	40.9928	0.0275109	8.69103	4.1818	0.209973	356.282	0.571431	8.01968	1.47184	0.124369	16.0703	1.05949	17.6318	10.7199	4.92041	0.994162	33.8277	2.57646	1.1494	58.7792	16.267	13.8394	5.60423e-05	17.6543	2.55951	6.99929
21	0.183731	8.58631	0.273878	4.67841	0.780842	0.871223	0.0125853	0.642088	2.14079	1.19896	20.5076	0.330773	20.4008	0.185016	0.479062	1.68436	32.4606	0.708541	0.0686908	0.571431	111.266	0.050633	1.98049	5.26455	2.9757	0.136979	0.0162794	1.39158	0.0167503	3.88807	15.659	1.01999	0.738256	0.820946	0.530767	2.30175	1.22984	0.0236854	0.429542	0.297277
22	0.309963	1.26579	5.27532	1.12388	9.82697	5.0207	0.00352625	0.045727	0.594731	1.10482	1.22907	6.8808	6.91286	0.176122	29.2403	1.61523	24.2915	20.7347	7.52113	8.01968	0.050633	94.2246	11.4896	0.145706	0.0669927	2.24635	1.87007	8.24155	1.64944	0.00191676	0.604523	0.538883	0.00434758	0.0189747	0.0494731	0.0144519	0.000552773	0.0682362	0.00240917	0.0469059
23	0.20002	55.5111	1.56029	2.26825	3.13647	19.6535	2.31666	7.1858	1.29459	12.3102	0.29029	3.20415	1.11034	4.92793	1.33769	0.409736	50.4705	10.7366	0.336704	1.47184	1.98049	11.4896	182.538	0.783705	3.218	8.6546	0.0536148	6.26797	0.0212434	1.01478	7.7248	2.61557	1.6717	4.77254	0.941812	4.5717	0.656991	0.119224	0.594266	0.305789
24	2.04161	12.3416	0.82453	6.06847	0.11249	7.4267	1.46475	0.0627235	3.3622	0.163406	0.00716102	3.40738	3.82038	0.741019	7.19451	4.79756	4.86707	2.83697	4.8548	0.124369	5.26455	0.145706	0.783705	76.9999	0.199498	0.54508	9.05848	0.128403	0.072159	0.719094	0.705696	0.00614814	1.60263	1.9174	0.0769279	4.19679	0.000610534	1.53652	3.64116	1.44738
25	0.105285	7.1453	2.50739	1.052	0.798115	2.68696	0.27455	0.266422	2.64683	5.53393	2.55168	0.966505	10.8347	0.0984821	2.58415	0.474388	0.240032	2.05106	0.631401	16.0703	2.9757	0.0669927	3.218	0.199498	19.3496	1.87853	2.18685	1.00332	0.514234	0.0180188	1.65976	0.393474	0.341414	13.4863	3.83458	5.55061	1.87609	1.79326	0.994114	1.49558
26	6.18372	0.549931	15.0412	0.159299	14.141	0.0064853	9.56921	2.35587	1.31993	9.61785	3.07486	0.0319023	8.89372	1.54311	12.7521	2.04205	13.0927	15.9893	5.01001	1.05949	0.136979	2.24635	8.6546	0.54508	1.87853	50.6647	3.92034	4.32448	2.47242	1.16395	4.18804	0.106551	0.0215876	1.16267	2.64778	0.792508	0.430955	0.696113	0.0388565	0.30796
27	0.189444	8.50677	5.80667	0.915737	2.50121	7.33916	3.27565	1.22911	1.70791	0.79235	5.74744	0.114313	9.13918	0.272841	1.11815	1.70652	0.26246	1.27669	0.725949	17.6318	0.0162794	1.87007	0.0536148	9.05848	2.18685	3.92034	39.6661	0.453771	0.0778932	0.347587	4.26746	0.0208984	0.959939	10.0794	1.37211	7.18438	0.00667263	1.65334	1.55936	1.3362
28	0.0478325	1.63509	0.103598	0.0605815	5.33718	0.345812	2.37841	0.246473	0.00157407	1.8566	1.42415	0.0336787	0.0348304	0.633502	9.72386	0.420571	5.26618	2.90855	4.44627	10.7199	1.39158	8.24155	6.26797	0.128403	1.00332	4.32448	0.453771	14.2463	0.255579	0.0364456	0.281064	4.16325	0.30252	2.55732	1.10478	0.00134638	0.173463	2.91363	0.241457	0.699974
29	0.216681	0.496099	28.4521	0.0351781	2.96553e-06	5.41094	0.35225	0.192618	3.55118	5.49953	2.52903	1.08728	0.663656	1.9063	15.8592	0.3329	0.137138	0.0553586	0.000806957	4.92041	0.0167503	1.64944	0.0212434	0.072159	0.514234	2.47242	0.0778932	0.255579	20.4835	0.0179473	1.53758	2.01041	3.41444	1.87336	3.51855	0.039278	0.978139	4.10519	0.0334874	0.513317
30	0.118538	4.04976	0.017419	0.00154494	0.876323	0.259332	0.215131	0.64449	1.9404	0.47415	1.12024	0.00304357	1.1603	0.419526	3.66476	0.870017	0.499229	6.08089	0.963298	0.994162	3.88807	0.00191676	1.01478	0.719094	0.0180188	1.16395	0.347587	0.0364456	0.0179473	9.04165	17.4744	2.82299	0.00844503	0.0158433	1.71032	0.603178	0.682363	0.00854977	0.609108	0.00149499
31	2.1053	16.1623	2.94535	1.06076	16.4531	1.53882	0.547883	1.19488	8.36293	1.42415	9.79293	1.6791	2.05313	2.37874	16.6398	2.80927	2.12341	2.51192	0.277372	33.8277	15.659	0.604523	7.7248	0.705696	1.65976	4.18804	4.26746	0.281064	1.53758	17.4744	124.647	3.8442	0.392134	8.80136	0.0567746	2.88859	0.015534	0.211158	1.18933	0.217433
32	0.00666896	0.368463	0.613419	0.0400566	0.469168	2.4761	0.0339991	0.228079	0.464099	0.094554	0.152842	1.00218	1.07735	0.0519837	2.70786	1.31869	1.03684	0.150032	3.29098	2.57646	1.01999	0.538883	2.61557	0.00614814	0.393474	0.106551	0.0208984	4.16325	2.01041	2.82299	3.8442	9.1442	1.58478	0.968627	3.31267	1.28625	0.784967	3.85396	0.120907	0.48388
33	0.627638	7.06558	1.56728	0.786509	0.0725948	0.698054	0.0383225	0.8786	2.50227	0.796023	0.118331	0.588011	0.0755887	0.116102	0.907123	0.171526	0.601213	0.00512362	0.177254	1.1494	0.738256	0.00434758	1.6717	1.60263	0.341414	0.0215876	0.959939	0.30252	3.41444	0.00844503	0.392134	1.58478	4.78104	0.460757	0.457852	4.73354	2.09203	1.17951	1.00858	0.00903622
34	1.18603	26.5441	7.06505	0.092068	3.49416	0.869572	1.37075	1.33777	0.000562474	3.97104	3.48737	1.17522	5.11095	0.589245	6.59281	1.41572	0.932272	3.95159	2.41931	58.7792	0.820946	0.0189747	4.77254	1.9174	13.4863	1.16267	10.0794	2.55732	1.87336	0.0158433	8.80136	0.968627	0.460757	39.2342	11.0432	15.4232	2.32412	5.43092	2.30281	3.97537
35	0.487558	1.08965	8.31688	0.102908	0.106525	2.14725	0.0172528	1.07134	0.765582	1.0945	0.0551566	0.174813	1.9511	0.965163	0.212211	0.028308	0.444427	8.93425	1.32184	16.267	0.530767	0.0494731	0.941812	0.0769279	3.83458	2.64778	1.37211	1.10478	3.51855	1.71032	0.0567746	3.31267	0.457852	11.0432	10.9667	0.517315	0.0922994	5.06828	0.000881664	1.42326
36	0.00182479	24.9687	2.42721	0.366715	0.168922	0.0751638	0.801773	1.29911	1.65184	10.3681	0.119758	1.65009	0.17712	0.756859	7.94076	1.24304	2.54517	0.0247771	0.00843133	13.8394	2.30175	0.0144519	4.5717	4.19679	5.55061	0.792508	7.18438	0.00134638	0.039278	0.603178	2.88859	1.28625	4.73354	15.4232	0.517315	24.8445	3.56081	0.0553556	3.91384	1.3905
37	0.112262	0.84111	0.132016	0.14658	0.670576	0.575343	0.0878596	1.88577	1.60375	2.43632	0.403377	4.5823	1.16878	0.0453649	3.81024	0.000750432	1.12276	3.52119	0.0444816	5.60423e-05	1.22984	0.000552773	0.656991	0.000610534	1.87609	0.430955	0.00667263	0.173463	0.978139	0.682363	0.015534	0.784967	2.09203	2.32412	0.0922994	3.56081	7.62833	1.98586	0.191231	0.000178583
38	0.176659	3.46113	4.64429	0.00665206	0.60311	2.04403	0.0321875	0.0630398	2.21601	0.000108031	1.01192	1.79855	0.830846	0.315323	3.04932	0.59227	0.312082	0.078134	0.367482	17.6543	0.0236854	0.0682362	0.119224	1.53652	1.79326	0.696113	1.65334	2.91363	4.10519	0.00854977	0.211158	3.85396	1.17951	5.43092	5.06828	0.0553556	1.98586	9.84912	0.170559	1.89361
39	0.0511146	9.12171	0.00411253	0.387072	0.109559	0.0150377	0.0193141	0.000268516	0.112233	0.424469	0.434757	0.101638	0.0225211	0.0656568	1.26765	0.350124	0.0018713	0.527872	0.089577	2.55951	0.429542	0.00240917	0.594266	3.64116	0.994114	0.0388565	1.55936	0.241457	0.0334874	0.609108	1.18933	0.120907	1.00858	2.30281	0.000881664	3.91384	0.191231	0.170559	1.38599	0.426099
40	0.0623597	4.07223	0.95724	0.0182895	0.121404	0.265163	0.0296259	0.0353364	0.0891797	0.335959	0.365822	0.0143369	0.642328	0.0940875	0.685441	0.442419	0.0032206	0.138281	0.0680921	6.99929	0.297277	0.0469059	0.305789	1.44738	1.49558	0.30796	1.3362	0.699974	0.513317	0.00149499	0.217433	0.48388	0.00903622	3.97537	1.42326	1.3905	0.000178583	1.89361	0.426099	0.793703
