# Supplementary material for: Improved GNSS integer ambiguity resolution method based on the column oriented Cholesky decomposition
Source: Research Square preprint supplement (doi:10.21203/rs.3.rs-2360038/v1), 2022-12-20
Supplement: Supplementary file 4 [file Figure 3-simulation2.xlsx]

## Sheet: Sheet1
Floating point solution a	130.331	-82.1261	-104.506	18.2593	-67.5083
Floating point solution a	130.331	-82.1261	-104.506	18.2593	-67.5083	224.523
Floating point solution a	130.331	-82.1261	-104.506	18.2593	-67.5083	224.523	10.6306
Floating point solution a	130.331	-82.1261	-104.506	18.2593	-67.5083	224.523	10.6306	131.873
Floating point solution a	130.331	-82.1261	-104.506	18.2593	-67.5083	224.523	10.6306	131.873	21.5575
Floating point solution a	130.331	-82.1261	-104.506	18.2593	-67.5083	224.523	10.6306	131.873	21.5575	88.5844
Floating point solution a	130.331	-82.1261	-104.506	18.2593	-67.5083	224.523	10.6306	131.873	21.5575	88.5844	201.085
Floating point solution a	130.331	-82.1261	-104.506	18.2593	-67.5083	224.523	10.6306	131.873	21.5575	88.5844	201.085	-2.8455
Floating point solution a	130.331	-82.1261	-104.506	18.2593	-67.5083	224.523	10.6306	131.873	21.5575	88.5844	201.085	-2.8455	63.5165
Floating point solution a	130.331	-82.1261	-104.506	18.2593	-67.5083	224.523	10.6306	131.873	21.5575	88.5844	201.085	-2.8455	63.5165	68.8538
Floating point solution a	130.331	-82.1261	-104.506	18.2593	-67.5083	224.523	10.6306	131.873	21.5575	88.5844	201.085	-2.8455	63.5165	68.8538	127.597
Floating point solution a	130.331	-82.1261	-104.506	18.2593	-67.5083	224.523	10.6306	131.873	21.5575	88.5844	201.085	-2.8455	63.5165	68.8538	127.597	26.5142
Floating point solution a	130.331	-82.1261	-104.506	18.2593	-67.5083	224.523	10.6306	131.873	21.5575	88.5844	201.085	-2.8455	63.5165	68.8538	127.597	26.5142	-106.641
Floating point solution a	130.331	-82.1261	-104.506	18.2593	-67.5083	224.523	10.6306	131.873	21.5575	88.5844	201.085	-2.8455	63.5165	68.8538	127.597	26.5142	-106.641	78.0602
Floating point solution a	130.331	-82.1261	-104.506	18.2593	-67.5083	224.523	10.6306	131.873	21.5575	88.5844	201.085	-2.8455	63.5165	68.8538	127.597	26.5142	-106.641	78.0602	-122.588
Floating point solution a	130.331	-82.1261	-104.506	18.2593	-67.5083	224.523	10.6306	131.873	21.5575	88.5844	201.085	-2.8455	63.5165	68.8538	127.597	26.5142	-106.641	78.0602	-122.588	34.9073
Floating point solution a	130.331	-82.1261	-104.506	18.2593	-67.5083	224.523	10.6306	131.873	21.5575	88.5844	201.085	-2.8455	63.5165	68.8538	127.597	26.5142	-106.641	78.0602	-122.588	34.9073	-12.3672
Floating point solution a	130.331	-82.1261	-104.506	18.2593	-67.5083	224.523	10.6306	131.873	21.5575	88.5844	201.085	-2.8455	63.5165	68.8538	127.597	26.5142	-106.641	78.0602	-122.588	34.9073	-12.3672	75.1373
Floating point solution a	130.331	-82.1261	-104.506	18.2593	-67.5083	224.523	10.6306	131.873	21.5575	88.5844	201.085	-2.8455	63.5165	68.8538	127.597	26.5142	-106.641	78.0602	-122.588	34.9073	-12.3672	75.1373	101.628
Floating point solution a	130.331	-82.1261	-104.506	18.2593	-67.5083	224.523	10.6306	131.873	21.5575	88.5844	201.085	-2.8455	63.5165	68.8538	127.597	26.5142	-106.641	78.0602	-122.588	34.9073	-12.3672	75.1373	101.628	-57.3793
Floating point solution a	130.331	-82.1261	-104.506	18.2593	-67.5083	224.523	10.6306	131.873	21.5575	88.5844	201.085	-2.8455	63.5165	68.8538	127.597	26.5142	-106.641	78.0602	-122.588	34.9073	-12.3672	75.1373	101.628	-57.3793	-23.3895
Floating point solution a	130.331	-82.1261	-104.506	18.2593	-67.5083	224.523	10.6306	131.873	21.5575	88.5844	201.085	-2.8455	63.5165	68.8538	127.597	26.5142	-106.641	78.0602	-122.588	34.9073	-12.3672	75.1373	101.628	-57.3793	-23.3895	43.6551
Floating point solution a	130.331	-82.1261	-104.506	18.2593	-67.5083	224.523	10.6306	131.873	21.5575	88.5844	201.085	-2.8455	63.5165	68.8538	127.597	26.5142	-106.641	78.0602	-122.588	34.9073	-12.3672	75.1373	101.628	-57.3793	-23.3895	43.6551	-67.5227
Floating point solution a	130.331	-82.1261	-104.506	18.2593	-67.5083	224.523	10.6306	131.873	21.5575	88.5844	201.085	-2.8455	63.5165	68.8538	127.597	26.5142	-106.641	78.0602	-122.588	34.9073	-12.3672	75.1373	101.628	-57.3793	-23.3895	43.6551	-67.5227	80.2545
Floating point solution a	130.331	-82.1261	-104.506	18.2593	-67.5083	224.523	10.6306	131.873	21.5575	88.5844	201.085	-2.8455	63.5165	68.8538	127.597	26.5142	-106.641	78.0602	-122.588	34.9073	-12.3672	75.1373	101.628	-57.3793	-23.3895	43.6551	-67.5227	80.2545	-31.2372
Floating point solution a	130.331	-82.1261	-104.506	18.2593	-67.5083	224.523	10.6306	131.873	21.5575	88.5844	201.085	-2.8455	63.5165	68.8538	127.597	26.5142	-106.641	78.0602	-122.588	34.9073	-12.3672	75.1373	101.628	-57.3793	-23.3895	43.6551	-67.5227	80.2545	-31.2372	-4.2215
Floating point solution a	130.331	-82.1261	-104.506	18.2593	-67.5083	224.523	10.6306	131.873	21.5575	88.5844	201.085	-2.8455	63.5165	68.8538	127.597	26.5142	-106.641	78.0602	-122.588	34.9073	-12.3672	75.1373	101.628	-57.3793	-23.3895	43.6551	-67.5227	80.2545	-31.2372	-4.2215	25.7881
Floating point solution a	130.331	-82.1261	-104.506	18.2593	-67.5083	224.523	10.6306	131.873	21.5575	88.5844	201.085	-2.8455	63.5165	68.8538	127.597	26.5142	-106.641	78.0602	-122.588	34.9073	-12.3672	75.1373	101.628	-57.3793	-23.3895	43.6551	-67.5227	80.2545	-31.2372	-4.2215	25.7881	-25.3744
Floating point solution a	130.331	-82.1261	-104.506	18.2593	-67.5083	224.523	10.6306	131.873	21.5575	88.5844	201.085	-2.8455	63.5165	68.8538	127.597	26.5142	-106.641	78.0602	-122.588	34.9073	-12.3672	75.1373	101.628	-57.3793	-23.3895	43.6551	-67.5227	80.2545	-31.2372	-4.2215	25.7881	-25.3744	-31.2344
Floating point solution a	130.331	-82.1261	-104.506	18.2593	-67.5083	224.523	10.6306	131.873	21.5575	88.5844	201.085	-2.8455	63.5165	68.8538	127.597	26.5142	-106.641	78.0602	-122.588	34.9073	-12.3672	75.1373	101.628	-57.3793	-23.3895	43.6551	-67.5227	80.2545	-31.2372	-4.2215	25.7881	-25.3744	-31.2344	-20.0177
Floating point solution a	130.331	-82.1261	-104.506	18.2593	-67.5083	224.523	10.6306	131.873	21.5575	88.5844	201.085	-2.8455	63.5165	68.8538	127.597	26.5142	-106.641	78.0602	-122.588	34.9073	-12.3672	75.1373	101.628	-57.3793	-23.3895	43.6551	-67.5227	80.2545	-31.2372	-4.2215	25.7881	-25.3744	-31.2344	-20.0177	50.8824
Floating point solution a	130.331	-82.1261	-104.506	18.2593	-67.5083	224.523	10.6306	131.873	21.5575	88.5844	201.085	-2.8455	63.5165	68.8538	127.597	26.5142	-106.641	78.0602	-122.588	34.9073	-12.3672	75.1373	101.628	-57.3793	-23.3895	43.6551	-67.5227	80.2545	-31.2372	-4.2215	25.7881	-25.3744	-31.2344	-20.0177	50.8824	-148.403
Floating point solution a	130.331	-82.1261	-104.506	18.2593	-67.5083	224.523	10.6306	131.873	21.5575	88.5844	201.085	-2.8455	63.5165	68.8538	127.597	26.5142	-106.641	78.0602	-122.588	34.9073	-12.3672	75.1373	101.628	-57.3793	-23.3895	43.6551	-67.5227	80.2545	-31.2372	-4.2215	25.7881	-25.3744	-31.2344	-20.0177	50.8824	-148.403	-93.933
Floating point solution a	130.331	-82.1261	-104.506	18.2593	-67.5083	224.523	10.6306	131.873	21.5575	88.5844	201.085	-2.8455	63.5165	68.8538	127.597	26.5142	-106.641	78.0602	-122.588	34.9073	-12.3672	75.1373	101.628	-57.3793	-23.3895	43.6551	-67.5227	80.2545	-31.2372	-4.2215	25.7881	-25.3744	-31.2344	-20.0177	50.8824	-148.403	-93.933	38.7282
Floating point solution a	130.331	-82.1261	-104.506	18.2593	-67.5083	224.523	10.6306	131.873	21.5575	88.5844	201.085	-2.8455	63.5165	68.8538	127.597	26.5142	-106.641	78.0602	-122.588	34.9073	-12.3672	75.1373	101.628	-57.3793	-23.3895	43.6551	-67.5227	80.2545	-31.2372	-4.2215	25.7881	-25.3744	-31.2344	-20.0177	50.8824	-148.403	-93.933	38.7282	93.2062
Floating point solution a	130.331	-82.1261	-104.506	18.2593	-67.5083	224.523	10.6306	131.873	21.5575	88.5844	201.085	-2.8455	63.5165	68.8538	127.597	26.5142	-106.641	78.0602	-122.588	34.9073	-12.3672	75.1373	101.628	-57.3793	-23.3895	43.6551	-67.5227	80.2545	-31.2372	-4.2215	25.7881	-25.3744	-31.2344	-20.0177	50.8824	-148.403	-93.933	38.7282	93.2062	57.9972
Lt matrix	1	-0.8213	0.1826	0.1063	2.0109	0.2651	0.7514	-0.3124	-0.9393	0.5149	-1.6253	-0.2997	1.0697	-0.923	0.5249	0.4004	-0.6138	1.8249	1.4395	0.0597	0.7469	-1.7123	-0.0284	-1.1351	1.1352	1.0483	0.5314	0.2535	-0.2893	1.6989	0.2447	-0.6348	-0.5529	-0.7258	-1.46	0.2189	-0.3118	-0.6202	-0.5852	-0.2803
2	0	1	-0.6751	1.3187	-0.0285	-1.0664	1.0163	-0.0422	0.3873	-1.2232	-0.2497	0.389	-0.4213	0.4469	0.0708	-0.3617	-1.4152	-1.0023	0.4285	1.0289	-0.8544	-1.2747	1.1321	-1.4565	-0.7505	-0.5362	0.0966	-0.8129	-0.716	-0.9698	-0.0985	0.14	-1.2679	0.586	-1.6144	-0.0306	-0.2455	-0.1113	-2.2055	2.2651
3	0	0	1	0.2156	0.6352	0.7806	-0.5738	0.2579	0.9321	-1.1728	0.6065	2.2525	0.3309	-0.6934	1.1947	-0.5181	0.0823	1.3135	-0.5953	2.4597	-1.5127	-1.1962	1.2019	-0.6487	0.4261	0.5218	0.7393	-0.3138	0.7749	-0.648	2.0509	-0.1413	-1.445	0.4096	0.8145	-2.0161	0.2152	-0.042	-1.1173	-1.0982
4	0	0	0	1	0.6885	-1.2259	-0.2339	-0.2537	0.58	-2.0044	-1.111	1.785	-0.7126	0.5617	0.6671	-0.577	0.7564	0.1495	0.3366	2.7116	1.0921	0.7849	-0.086	0.8382	-1.1802	1.4319	-0.834	0.005	-1.5038	-0.7029	-0.0224	-0.5032	0.0461	-0.8533	-1.8698	-0.0368	0.1358	-0.6288	-0.7483	0.1518
5	0	0	0	0	1	0.3491	0.4366	-0.3123	0.4908	0.0578	0.4685	0.7506	0.773	0.6895	0.3973	-1.2006	-0.8931	-0.2166	-0.2876	-0.5071	-0.5249	-0.7395	-0.4211	-0.2216	0.9013	0.5389	-1.1191	-1.0926	1.5314	1.0653	0.1931	0.7701	1.0042	-2.2129	1.0221	-0.093	-0.9111	0.5987	0.1083	-0.3911
6	0	0	0	0	0	1	-0.6752	-0.2002	-0.5126	0.6748	0.0273	-0.7089	0.9428	-0.633	1.0792	-0.7957	-2.8829	0.9942	-0.0883	0.0296	1.9601	-0.4062	-1.3363	0.6663	-0.6592	-0.1588	-0.1288	2.2449	0.5952	-0.7985	-0.4132	0.8201	-0.6519	0.4268	0.6124	-0.8513	-0.0826	0.4123	-0.7152	-0.578
7	0	0	0	0	0	0	1	0.5088	0.6201	-0.6278	-0.0705	0.4161	0.0739	0.747	1.7539	0.2496	-2.0639	-0.5699	-0.2762	0.8415	-0.2123	0.3531	-0.4336	-1.6385	0.5662	1.6947	1.4305	0.8851	0.3459	0.1354	-0.0176	-0.4346	-0.282	-0.6021	-0.6052	0.3739	-2.4667	-0.8585	0.0184	-0.1932
8	0	0	0	0	0	0	0	1	0.255	0.782	-0.1684	0.7043	0.9395	-0.3552	-2.0212	0.9021	-0.5221	0.7766	-0.2671	2.3789	1.1373	-0.3761	-1.0674	0.0413	0.7663	-0.5668	0.3737	-0.2366	-1.5792	-0.5515	0.6682	-0.2729	1.0445	0.5474	0.2898	-0.4322	0.3384	-1.2745	-0.1736	-0.211
9	0	0	0	0	0	0	0	0	1	0.7391	-0.3891	-0.4143	0.154	0.8621	-0.2264	0.8052	-0.1812	0.5674	-0.6743	0.283	0.3567	1.6995	-0.6693	1.0953	0.2054	0.3266	-1.3254	-1.5443	0.975	0.8598	0.2201	-1.9054	-1.0284	-0.1162	0.3215	-0.0623	0.9357	1.0985	-0.7923	-0.3352
10	0	0	0	0	0	0	0	0	0	1	-1.504	0.4941	-1.7685	-1.0525	1.595	0.1119	-0.5052	-0.1556	-0.8344	0.0231	0.9034	0.1883	-1.0305	-0.3867	-0.8836	-1.6432	0.7824	0.6421	0.397	-0.0553	1.0703	0.3155	-0.902	1.1076	-0.8129	-1.5186	-0.3435	-1.4084	0.3245	-0.6506
11	0	0	0	0	0	0	0	0	0	0	1	-0.1313	1.0612	1.573	-0.4982	0.0148	-0.0099	-0.3189	0.5776	-1.6834	0.2347	0.8586	-1.1502	-0.2196	0.6823	1.1543	-0.4433	0.0983	-0.6489	1.0164	-0.0619	-0.0279	-1.7734	1.7311	-0.4602	-0.8264	0.9312	-0.5057	-0.3093	0.6789
12	0	0	0	0	0	0	0	0	0	0	0	1	2.8178	1.5542	-0.6989	0.2374	1.1196	0.3814	-1.117	0.6959	-1.0542	-0.196	-0.0459	-2.6795	-0.116	0.5989	0.0456	0.3751	-1.1206	0.842	0.2291	0.096	0.0387	0.8544	1.5272	-0.1485	-0.7352	1.601	-0.5816	-0.1344
13	0	0	0	0	0	0	0	0	0	0	0	0	1	0.1732	1.5932	0.0208	0.6295	1.6538	2.1773	2.401	1.2873	0.5258	-0.7552	0.7066	-1.835	-0.1828	0.8437	0.0116	-0.2783	-2.0396	1.551	-1.0855	-0.2341	-0.7631	-1.321	2.3253	-0.5314	-1.3811	-0.6254	-0.8996
14	0	0	0	0	0	0	0	0	0	0	0	0	0	1	0.7158	-0.216	0.6131	-0.1254	-0.6359	-1.1859	-0.6033	-0.3868	-1.2114	0.6491	-0.6076	-0.182	1.1459	-0.1261	0.808	0.8948	-0.4883	0.0557	-0.0008	-0.5937	1.7533	0.9573	0.6882	0.6362	0.6881	0.3443
15	0	0	0	0	0	0	0	0	0	0	0	0	0	0	1	2.003	0.6257	-0.1604	0.4641	-0.1517	0.1715	1.3123	-0.8316	0.7408	0.2564	-0.6376	-0.9733	-0.1311	0.9715	-0.6611	0.6374	-2.4803	2.0604	1.5536	-1.6292	2.4207	1.4338	-1.7981	-0.7429	0.9293
16	0	0	0	0	0	0	0	0	0	0	0	0	0	0	0	1	-0.0835	1.4409	1.1186	-0.6809	0.7182	-0.4234	0.3033	1.2799	-0.3805	-0.5183	-0.742	-0.3032	0.2968	-0.5612	-0.0568	-0.5789	-0.4887	-0.1061	2.105	-0.561	1.7924	0.3339	-0.1493	0.7466
17	0	0	0	0	0	0	0	0	0	0	0	0	0	0	0	0	1	0.1381	0.3404	-0.4878	0.5092	-0.6051	-1.4406	2.3403	2.0157	0.9298	1.1626	0.9573	0.4042	0.0482	-1.3225	-0.6672	-0.187	0.6184	0.4631	-0.6965	-1.1797	-1.2747	0.0024	-0.0637
18	0	0	0	0	0	0	0	0	0	0	0	0	0	0	0	0	0	1	0.8558	1.7051	-1.8166	-1.4672	-1.2266	-2.604	0.0626	-1.3998	-0.1429	-0.2568	1.1265	1.0123	-0.6512	1.2883	0.2913	-0.8468	-2.0845	-0.6101	-0.2684	2.2645	1.4292	0.4174
19	0	0	0	0	0	0	0	0	0	0	0	0	0	0	0	0	0	0	1	0.7831	-0.5732	0.9937	0.2944	-1.1159	0.7383	-2.0873	0.4212	0.2229	-0.0797	-0.1391	-0.7903	1.6099	1.1684	-1.1113	-0.318	-0.388	0.2156	-0.4241	-0.7017	-0.2929
20	0	0	0	0	0	0	0	0	0	0	0	0	0	0	0	0	0	0	0	1	-1.6425	2.0303	-0.1283	-0.8299	0.4652	0.6648	-0.3675	0.4884	0.5371	-1.4557	1.8447	0.4657	0.9354	2.4368	0.4665	0.5541	0.8027	0.3421	0.4844	2.9696
21	0	0	0	0	0	0	0	0	0	0	0	0	0	0	0	0	0	0	0	0	1	-0.3735	0.8339	-0.6188	-2.0727	-1.3314	0.7847	0.5923	0.3183	-2.1746	1.3544	-0.5715	1.349	-1.6053	-0.2753	-0.3102	0.1826	0.9297	-0.3661	0.612
22	0	0	0	0	0	0	0	0	0	0	0	0	0	0	0	0	0	0	0	0	0	1	-0.4538	-1.2893	-0.2305	1.1961	0.5921	-1.9579	0.0389	1.8475	1.3657	1.5652	0.281	-0.4514	0.4857	-0.8011	1.0344	0.3294	0.1568	0.2431
23	0	0	0	0	0	0	0	0	0	0	0	0	0	0	0	0	0	0	0	0	0	0	1	-1.29	-0.5584	0.8405	-1.5547	-2.7485	-0.7023	-1.942	-1.1488	0.9186	-1.4871	0.2139	-1.5942	0.8961	-0.6381	0.3902	-0.5232	0.6207
24	0	0	0	0	0	0	0	0	0	0	0	0	0	0	0	0	0	0	0	0	0	0	0	1	-0.8331	0.5302	0.6297	0.4918	-0.5809	-0.1986	-1.4863	0.7161	0.8491	-0.9867	0.542	-1.2495	0.5182	-0.5053	-1.4688	1.3504
25	0	0	0	0	0	0	0	0	0	0	0	0	0	0	0	0	0	0	0	0	0	0	0	0	1	-0.4843	-0.7348	-0.337	-0.0976	1.8636	0.0022	-0.2028	-0.3243	0.417	0.0772	0.2415	-1.2254	0.9168	-0.1445	1.3727
26	0	0	0	0	0	0	0	0	0	0	0	0	0	0	0	0	0	0	0	0	0	0	0	0	0	1	1.5106	0.1396	1.4829	0.4945	0.449	-1.2755	-0.284	1.3326	-1.4797	-0.4965	-0.4464	-1.0614	-0.8637	-0.6229
27	0	0	0	0	0	0	0	0	0	0	0	0	0	0	0	0	0	0	0	0	0	0	0	0	0	0	1	-1.7136	0.345	-0.9985	0.6554	-0.566	0.231	-0.2876	0.8365	-0.0009	-2.0124	-0.3113	0.5748	-1.2975
28	0	0	0	0	0	0	0	0	0	0	0	0	0	0	0	0	0	0	0	0	0	0	0	0	0	0	0	1	0.9494	-1.0733	0.353	-1.0338	-0.0447	0.5931	0.0424	-0.5009	-1.1792	-0.6149	0.174	0.9391
29	0	0	0	0	0	0	0	0	0	0	0	0	0	0	0	0	0	0	0	0	0	0	0	0	0	0	0	0	1	-0.0217	0.8914	0.2075	-2.0651	0.1267	0.0129	-1.1154	0.3929	0.6258	-1.0128	-0.8042
30	0	0	0	0	0	0	0	0	0	0	0	0	0	0	0	0	0	0	0	0	0	0	0	0	0	0	0	0	0	1	-0.0848	0.611	0.0472	0.8905	0.2306	0.6045	-0.5165	-1.3308	-1.076	0.0434
31	0	0	0	0	0	0	0	0	0	0	0	0	0	0	0	0	0	0	0	0	0	0	0	0	0	0	0	0	0	0	1	-1.0335	-1.1146	-3.5155	0.8924	-0.6487	0.8026	0.7453	1.0714	-0.5234
32	0	0	0	0	0	0	0	0	0	0	0	0	0	0	0	0	0	0	0	0	0	0	0	0	0	0	0	0	0	0	0	1	-0.3767	0.1621	0.102	0.6807	-0.1491	0.3134	-1.2266	-0.7808
33	0	0	0	0	0	0	0	0	0	0	0	0	0	0	0	0	0	0	0	0	0	0	0	0	0	0	0	0	0	0	0	0	1	0.4966	0.498	0.0253	-0.185	-0.8637	1.3371	-0.1067
34	0	0	0	0	0	0	0	0	0	0	0	0	0	0	0	0	0	0	0	0	0	0	0	0	0	0	0	0	0	0	0	0	0	1	-0.7184	0.4058	0.0662	1.3857	-0.081	2.238
35	0	0	0	0	0	0	0	0	0	0	0	0	0	0	0	0	0	0	0	0	0	0	0	0	0	0	0	0	0	0	0	0	0	0	1	-0.2309	0.3056	-0.7138	-1.293	-1.3391
36	0	0	0	0	0	0	0	0	0	0	0	0	0	0	0	0	0	0	0	0	0	0	0	0	0	0	0	0	0	0	0	0	0	0	0	1	0.6057	1.2594	-1.5942	1.3236
37	0	0	0	0	0	0	0	0	0	0	0	0	0	0	0	0	0	0	0	0	0	0	0	0	0	0	0	0	0	0	0	0	0	0	0	0	1	-2.1067	0.6116	-0.015
38	0	0	0	0	0	0	0	0	0	0	0	0	0	0	0	0	0	0	0	0	0	0	0	0	0	0	0	0	0	0	0	0	0	0	0	0	0	1	-0.8516	-1.5446
39	0	0	0	0	0	0	0	0	0	0	0	0	0	0	0	0	0	0	0	0	0	0	0	0	0	0	0	0	0	0	0	0	0	0	0	0	0	0	1	-0.7327
40	0	0	0	0	0	0	0	0	0	0	0	0	0	0	0	0	0	0	0	0	0	0	0	0	0	0	0	0	0	0	0	0	0	0	0	0	0	0	0	1
L matrix	1	0	0	0	0	0	0	0	0	0	0	0	0	0	0	0	0	0	0	0	0	0	0	0	0	0	0	0	0	0	0	0	0	0	0	0	0	0	0	0
2	-0.8213	1	0	0	0	0	0	0	0	0	0	0	0	0	0	0	0	0	0	0	0	0	0	0	0	0	0	0	0	0	0	0	0	0	0	0	0	0	0	0
3	0.1826	-0.6751	1	0	0	0	0	0	0	0	0	0	0	0	0	0	0	0	0	0	0	0	0	0	0	0	0	0	0	0	0	0	0	0	0	0	0	0	0	0
4	0.1063	1.3187	0.2156	1	0	0	0	0	0	0	0	0	0	0	0	0	0	0	0	0	0	0	0	0	0	0	0	0	0	0	0	0	0	0	0	0	0	0	0	0
5	2.0109	-0.0285	0.6352	0.6885	1	0	0	0	0	0	0	0	0	0	0	0	0	0	0	0	0	0	0	0	0	0	0	0	0	0	0	0	0	0	0	0	0	0	0	0
6	0.2651	-1.0664	0.7806	-1.2259	0.3491	1	0	0	0	0	0	0	0	0	0	0	0	0	0	0	0	0	0	0	0	0	0	0	0	0	0	0	0	0	0	0	0	0	0	0
7	0.7514	1.0163	-0.5738	-0.2339	0.4366	-0.6752	1	0	0	0	0	0	0	0	0	0	0	0	0	0	0	0	0	0	0	0	0	0	0	0	0	0	0	0	0	0	0	0	0	0
8	-0.3124	-0.0422	0.2579	-0.2537	-0.3123	-0.2002	0.5088	1	0	0	0	0	0	0	0	0	0	0	0	0	0	0	0	0	0	0	0	0	0	0	0	0	0	0	0	0	0	0	0	0
9	-0.9393	0.3873	0.9321	0.58	0.4908	-0.5126	0.6201	0.255	1	0	0	0	0	0	0	0	0	0	0	0	0	0	0	0	0	0	0	0	0	0	0	0	0	0	0	0	0	0	0	0
10	0.5149	-1.2232	-1.1728	-2.0044	0.0578	0.6748	-0.6278	0.782	0.7391	1	0	0	0	0	0	0	0	0	0	0	0	0	0	0	0	0	0	0	0	0	0	0	0	0	0	0	0	0	0	0
11	-1.6253	-0.2497	0.6065	-1.111	0.4685	0.0273	-0.0705	-0.1684	-0.3891	-1.504	1	0	0	0	0	0	0	0	0	0	0	0	0	0	0	0	0	0	0	0	0	0	0	0	0	0	0	0	0	0
12	-0.2997	0.389	2.2525	1.785	0.7506	-0.7089	0.4161	0.7043	-0.4143	0.4941	-0.1313	1	0	0	0	0	0	0	0	0	0	0	0	0	0	0	0	0	0	0	0	0	0	0	0	0	0	0	0	0
13	1.0697	-0.4213	0.3309	-0.7126	0.773	0.9428	0.0739	0.9395	0.154	-1.7685	1.0612	2.8178	1	0	0	0	0	0	0	0	0	0	0	0	0	0	0	0	0	0	0	0	0	0	0	0	0	0	0	0
14	-0.923	0.4469	-0.6934	0.5617	0.6895	-0.633	0.747	-0.3552	0.8621	-1.0525	1.573	1.5542	0.1732	1	0	0	0	0	0	0	0	0	0	0	0	0	0	0	0	0	0	0	0	0	0	0	0	0	0	0
15	0.5249	0.0708	1.1947	0.6671	0.3973	1.0792	1.7539	-2.0212	-0.2264	1.595	-0.4982	-0.6989	1.5932	0.7158	1	0	0	0	0	0	0	0	0	0	0	0	0	0	0	0	0	0	0	0	0	0	0	0	0	0
16	0.4004	-0.3617	-0.5181	-0.577	-1.2006	-0.7957	0.2496	0.9021	0.8052	0.1119	0.0148	0.2374	0.0208	-0.216	2.003	1	0	0	0	0	0	0	0	0	0	0	0	0	0	0	0	0	0	0	0	0	0	0	0	0
17	-0.6138	-1.4152	0.0823	0.7564	-0.8931	-2.8829	-2.0639	-0.5221	-0.1812	-0.5052	-0.0099	1.1196	0.6295	0.6131	0.6257	-0.0835	1	0	0	0	0	0	0	0	0	0	0	0	0	0	0	0	0	0	0	0	0	0	0	0
18	1.8249	-1.0023	1.3135	0.1495	-0.2166	0.9942	-0.5699	0.7766	0.5674	-0.1556	-0.3189	0.3814	1.6538	-0.1254	-0.1604	1.4409	0.1381	1	0	0	0	0	0	0	0	0	0	0	0	0	0	0	0	0	0	0	0	0	0	0
19	1.4395	0.4285	-0.5953	0.3366	-0.2876	-0.0883	-0.2762	-0.2671	-0.6743	-0.8344	0.5776	-1.117	2.1773	-0.6359	0.4641	1.1186	0.3404	0.8558	1	0	0	0	0	0	0	0	0	0	0	0	0	0	0	0	0	0	0	0	0	0
20	0.0597	1.0289	2.4597	2.7116	-0.5071	0.0296	0.8415	2.3789	0.283	0.0231	-1.6834	0.6959	2.401	-1.1859	-0.1517	-0.6809	-0.4878	1.7051	0.7831	1	0	0	0	0	0	0	0	0	0	0	0	0	0	0	0	0	0	0	0	0
21	0.7469	-0.8544	-1.5127	1.0921	-0.5249	1.9601	-0.2123	1.1373	0.3567	0.9034	0.2347	-1.0542	1.2873	-0.6033	0.1715	0.7182	0.5092	-1.8166	-0.5732	-1.6425	1	0	0	0	0	0	0	0	0	0	0	0	0	0	0	0	0	0	0	0
22	-1.7123	-1.2747	-1.1962	0.7849	-0.7395	-0.4062	0.3531	-0.3761	1.6995	0.1883	0.8586	-0.196	0.5258	-0.3868	1.3123	-0.4234	-0.6051	-1.4672	0.9937	2.0303	-0.3735	1	0	0	0	0	0	0	0	0	0	0	0	0	0	0	0	0	0	0
23	-0.0284	1.1321	1.2019	-0.086	-0.4211	-1.3363	-0.4336	-1.0674	-0.6693	-1.0305	-1.1502	-0.0459	-0.7552	-1.2114	-0.8316	0.3033	-1.4406	-1.2266	0.2944	-0.1283	0.8339	-0.4538	1	0	0	0	0	0	0	0	0	0	0	0	0	0	0	0	0	0
24	-1.1351	-1.4565	-0.6487	0.8382	-0.2216	0.6663	-1.6385	0.0413	1.0953	-0.3867	-0.2196	-2.6795	0.7066	0.6491	0.7408	1.2799	2.3403	-2.604	-1.1159	-0.8299	-0.6188	-1.2893	-1.29	1	0	0	0	0	0	0	0	0	0	0	0	0	0	0	0	0
25	1.1352	-0.7505	0.4261	-1.1802	0.9013	-0.6592	0.5662	0.7663	0.2054	-0.8836	0.6823	-0.116	-1.835	-0.6076	0.2564	-0.3805	2.0157	0.0626	0.7383	0.4652	-2.0727	-0.2305	-0.5584	-0.8331	1	0	0	0	0	0	0	0	0	0	0	0	0	0	0	0
26	1.0483	-0.5362	0.5218	1.4319	0.5389	-0.1588	1.6947	-0.5668	0.3266	-1.6432	1.1543	0.5989	-0.1828	-0.182	-0.6376	-0.5183	0.9298	-1.3998	-2.0873	0.6648	-1.3314	1.1961	0.8405	0.5302	-0.4843	1	0	0	0	0	0	0	0	0	0	0	0	0	0	0
27	0.5314	0.0966	0.7393	-0.834	-1.1191	-0.1288	1.4305	0.3737	-1.3254	0.7824	-0.4433	0.0456	0.8437	1.1459	-0.9733	-0.742	1.1626	-0.1429	0.4212	-0.3675	0.7847	0.5921	-1.5547	0.6297	-0.7348	1.5106	1	0	0	0	0	0	0	0	0	0	0	0	0	0
28	0.2535	-0.8129	-0.3138	0.005	-1.0926	2.2449	0.8851	-0.2366	-1.5443	0.6421	0.0983	0.3751	0.0116	-0.1261	-0.1311	-0.3032	0.9573	-0.2568	0.2229	0.4884	0.5923	-1.9579	-2.7485	0.4918	-0.337	0.1396	-1.7136	1	0	0	0	0	0	0	0	0	0	0	0	0
29	-0.2893	-0.716	0.7749	-1.5038	1.5314	0.5952	0.3459	-1.5792	0.975	0.397	-0.6489	-1.1206	-0.2783	0.808	0.9715	0.2968	0.4042	1.1265	-0.0797	0.5371	0.3183	0.0389	-0.7023	-0.5809	-0.0976	1.4829	0.345	0.9494	1	0	0	0	0	0	0	0	0	0	0	0
30	1.6989	-0.9698	-0.648	-0.7029	1.0653	-0.7985	0.1354	-0.5515	0.8598	-0.0553	1.0164	0.842	-2.0396	0.8948	-0.6611	-0.5612	0.0482	1.0123	-0.1391	-1.4557	-2.1746	1.8475	-1.942	-0.1986	1.8636	0.4945	-0.9985	-1.0733	-0.0217	1	0	0	0	0	0	0	0	0	0	0
31	0.2447	-0.0985	2.0509	-0.0224	0.1931	-0.4132	-0.0176	0.6682	0.2201	1.0703	-0.0619	0.2291	1.551	-0.4883	0.6374	-0.0568	-1.3225	-0.6512	-0.7903	1.8447	1.3544	1.3657	-1.1488	-1.4863	0.0022	0.449	0.6554	0.353	0.8914	-0.0848	1	0	0	0	0	0	0	0	0	0
32	-0.6348	0.14	-0.1413	-0.5032	0.7701	0.8201	-0.4346	-0.2729	-1.9054	0.3155	-0.0279	0.096	-1.0855	0.0557	-2.4803	-0.5789	-0.6672	1.2883	1.6099	0.4657	-0.5715	1.5652	0.9186	0.7161	-0.2028	-1.2755	-0.566	-1.0338	0.2075	0.611	-1.0335	1	0	0	0	0	0	0	0	0
33	-0.5529	-1.2679	-1.445	0.0461	1.0042	-0.6519	-0.282	1.0445	-1.0284	-0.902	-1.7734	0.0387	-0.2341	-0.0008	2.0604	-0.4887	-0.187	0.2913	1.1684	0.9354	1.349	0.281	-1.4871	0.8491	-0.3243	-0.284	0.231	-0.0447	-2.0651	0.0472	-1.1146	-0.3767	1	0	0	0	0	0	0	0
34	-0.7258	0.586	0.4096	-0.8533	-2.2129	0.4268	-0.6021	0.5474	-0.1162	1.1076	1.7311	0.8544	-0.7631	-0.5937	1.5536	-0.1061	0.6184	-0.8468	-1.1113	2.4368	-1.6053	-0.4514	0.2139	-0.9867	0.417	1.3326	-0.2876	0.5931	0.1267	0.8905	-3.5155	0.1621	0.4966	1	0	0	0	0	0	0
35	-1.46	-1.6144	0.8145	-1.8698	1.0221	0.6124	-0.6052	0.2898	0.3215	-0.8129	-0.4602	1.5272	-1.321	1.7533	-1.6292	2.105	0.4631	-2.0845	-0.318	0.4665	-0.2753	0.4857	-1.5942	0.542	0.0772	-1.4797	0.8365	0.0424	0.0129	0.2306	0.8924	0.102	0.498	-0.7184	1	0	0	0	0	0
36	0.2189	-0.0306	-2.0161	-0.0368	-0.093	-0.8513	0.3739	-0.4322	-0.0623	-1.5186	-0.8264	-0.1485	2.3253	0.9573	2.4207	-0.561	-0.6965	-0.6101	-0.388	0.5541	-0.3102	-0.8011	0.8961	-1.2495	0.2415	-0.4965	-0.0009	-0.5009	-1.1154	0.6045	-0.6487	0.6807	0.0253	0.4058	-0.2309	1	0	0	0	0
37	-0.3118	-0.2455	0.2152	0.1358	-0.9111	-0.0826	-2.4667	0.3384	0.9357	-0.3435	0.9312	-0.7352	-0.5314	0.6882	1.4338	1.7924	-1.1797	-0.2684	0.2156	0.8027	0.1826	1.0344	-0.6381	0.5182	-1.2254	-0.4464	-2.0124	-1.1792	0.3929	-0.5165	0.8026	-0.1491	-0.185	0.0662	0.3056	0.6057	1	0	0	0
38	-0.6202	-0.1113	-0.042	-0.6288	0.5987	0.4123	-0.8585	-1.2745	1.0985	-1.4084	-0.5057	1.601	-1.3811	0.6362	-1.7981	0.3339	-1.2747	2.2645	-0.4241	0.3421	0.9297	0.3294	0.3902	-0.5053	0.9168	-1.0614	-0.3113	-0.6149	0.6258	-1.3308	0.7453	0.3134	-0.8637	1.3857	-0.7138	1.2594	-2.1067	1	0	0
39	-0.5852	-2.2055	-1.1173	-0.7483	0.1083	-0.7152	0.0184	-0.1736	-0.7923	0.3245	-0.3093	-0.5816	-0.6254	0.6881	-0.7429	-0.1493	0.0024	1.4292	-0.7017	0.4844	-0.3661	0.1568	-0.5232	-1.4688	-0.1445	-0.8637	0.5748	0.174	-1.0128	-1.076	1.0714	-1.2266	1.3371	-0.081	-1.293	-1.5942	0.6116	-0.8516	1	0
40	-0.2803	2.2651	-1.0982	0.1518	-0.3911	-0.578	-0.1932	-0.211	-0.3352	-0.6506	0.6789	-0.1344	-0.8996	0.3443	0.9293	0.7466	-0.0637	0.4174	-0.2929	2.9696	0.612	0.2431	0.6207	1.3504	1.3727	-0.6229	-1.2975	0.9391	-0.8042	0.0434	-0.5234	-0.7808	-0.1067	2.238	-1.3391	1.3236	-0.015	-1.5446	-0.7327	1
D matrix	200	0	0	0	0	0	0	0	0	0	0	0	0	0	0	0	0	0	0	0	0	0	0	0	0	0	0	0	0	0	0	0	0	0	0	0	0	0	0	0
2	0	200	0	0	0	0	0	0	0	0	0	0	0	0	0	0	0	0	0	0	0	0	0	0	0	0	0	0	0	0	0	0	0	0	0	0	0	0	0	0
3	0	0	200	0	0	0	0	0	0	0	0	0	0	0	0	0	0	0	0	0	0	0	0	0	0	0	0	0	0	0	0	0	0	0	0	0	0	0	0	0
4	0	0	0	0.1	0	0	0	0	0	0	0	0	0	0	0	0	0	0	0	0	0	0	0	0	0	0	0	0	0	0	0	0	0	0	0	0	0	0	0	0
5	0	0	0	0	0.1	0	0	0	0	0	0	0	0	0	0	0	0	0	0	0	0	0	0	0	0	0	0	0	0	0	0	0	0	0	0	0	0	0	0	0
6	0	0	0	0	0	0.1	0	0	0	0	0	0	0	0	0	0	0	0	0	0	0	0	0	0	0	0	0	0	0	0	0	0	0	0	0	0	0	0	0	0
7	0	0	0	0	0	0	0.1	0	0	0	0	0	0	0	0	0	0	0	0	0	0	0	0	0	0	0	0	0	0	0	0	0	0	0	0	0	0	0	0	0
8	0	0	0	0	0	0	0	0.1	0	0	0	0	0	0	0	0	0	0	0	0	0	0	0	0	0	0	0	0	0	0	0	0	0	0	0	0	0	0	0	0
9	0	0	0	0	0	0	0	0	0.1	0	0	0	0	0	0	0	0	0	0	0	0	0	0	0	0	0	0	0	0	0	0	0	0	0	0	0	0	0	0	0
10	0	0	0	0	0	0	0	0	0	0.1	0	0	0	0	0	0	0	0	0	0	0	0	0	0	0	0	0	0	0	0	0	0	0	0	0	0	0	0	0	0
11	0	0	0	0	0	0	0	0	0	0	0.1	0	0	0	0	0	0	0	0	0	0	0	0	0	0	0	0	0	0	0	0	0	0	0	0	0	0	0	0	0
12	0	0	0	0	0	0	0	0	0	0	0	0.1	0	0	0	0	0	0	0	0	0	0	0	0	0	0	0	0	0	0	0	0	0	0	0	0	0	0	0	0
13	0	0	0	0	0	0	0	0	0	0	0	0	0.1	0	0	0	0	0	0	0	0	0	0	0	0	0	0	0	0	0	0	0	0	0	0	0	0	0	0	0
14	0	0	0	0	0	0	0	0	0	0	0	0	0	0.1	0	0	0	0	0	0	0	0	0	0	0	0	0	0	0	0	0	0	0	0	0	0	0	0	0	0
15	0	0	0	0	0	0	0	0	0	0	0	0	0	0	0.1	0	0	0	0	0	0	0	0	0	0	0	0	0	0	0	0	0	0	0	0	0	0	0	0	0
16	0	0	0	0	0	0	0	0	0	0	0	0	0	0	0	0.1	0	0	0	0	0	0	0	0	0	0	0	0	0	0	0	0	0	0	0	0	0	0	0	0
17	0	0	0	0	0	0	0	0	0	0	0	0	0	0	0	0	0.1	0	0	0	0	0	0	0	0	0	0	0	0	0	0	0	0	0	0	0	0	0	0	0
18	0	0	0	0	0	0	0	0	0	0	0	0	0	0	0	0	0	0.1	0	0	0	0	0	0	0	0	0	0	0	0	0	0	0	0	0	0	0	0	0	0
19	0	0	0	0	0	0	0	0	0	0	0	0	0	0	0	0	0	0	0.1	0	0	0	0	0	0	0	0	0	0	0	0	0	0	0	0	0	0	0	0	0
20	0	0	0	0	0	0	0	0	0	0	0	0	0	0	0	0	0	0	0	0.1	0	0	0	0	0	0	0	0	0	0	0	0	0	0	0	0	0	0	0	0
21	0	0	0	0	0	0	0	0	0	0	0	0	0	0	0	0	0	0	0	0	0.1	0	0	0	0	0	0	0	0	0	0	0	0	0	0	0	0	0	0	0
22	0	0	0	0	0	0	0	0	0	0	0	0	0	0	0	0	0	0	0	0	0	0.1	0	0	0	0	0	0	0	0	0	0	0	0	0	0	0	0	0	0
23	0	0	0	0	0	0	0	0	0	0	0	0	0	0	0	0	0	0	0	0	0	0	0.1	0	0	0	0	0	0	0	0	0	0	0	0	0	0	0	0	0
24	0	0	0	0	0	0	0	0	0	0	0	0	0	0	0	0	0	0	0	0	0	0	0	0.1	0	0	0	0	0	0	0	0	0	0	0	0	0	0	0	0
25	0	0	0	0	0	0	0	0	0	0	0	0	0	0	0	0	0	0	0	0	0	0	0	0	0.1	0	0	0	0	0	0	0	0	0	0	0	0	0	0	0
26	0	0	0	0	0	0	0	0	0	0	0	0	0	0	0	0	0	0	0	0	0	0	0	0	0	0.1	0	0	0	0	0	0	0	0	0	0	0	0	0	0
27	0	0	0	0	0	0	0	0	0	0	0	0	0	0	0	0	0	0	0	0	0	0	0	0	0	0	0.1	0	0	0	0	0	0	0	0	0	0	0	0	0
28	0	0	0	0	0	0	0	0	0	0	0	0	0	0	0	0	0	0	0	0	0	0	0	0	0	0	0	0.1	0	0	0	0	0	0	0	0	0	0	0	0
29	0	0	0	0	0	0	0	0	0	0	0	0	0	0	0	0	0	0	0	0	0	0	0	0	0	0	0	0	0.1	0	0	0	0	0	0	0	0	0	0	0
30	0	0	0	0	0	0	0	0	0	0	0	0	0	0	0	0	0	0	0	0	0	0	0	0	0	0	0	0	0	0.1	0	0	0	0	0	0	0	0	0	0
31	0	0	0	0	0	0	0	0	0	0	0	0	0	0	0	0	0	0	0	0	0	0	0	0	0	0	0	0	0	0	0.1	0	0	0	0	0	0	0	0	0
32	0	0	0	0	0	0	0	0	0	0	0	0	0	0	0	0	0	0	0	0	0	0	0	0	0	0	0	0	0	0	0	0.1	0	0	0	0	0	0	0	0
33	0	0	0	0	0	0	0	0	0	0	0	0	0	0	0	0	0	0	0	0	0	0	0	0	0	0	0	0	0	0	0	0	0.1	0	0	0	0	0	0	0
34	0	0	0	0	0	0	0	0	0	0	0	0	0	0	0	0	0	0	0	0	0	0	0	0	0	0	0	0	0	0	0	0	0	0.1	0	0	0	0	0	0
35	0	0	0	0	0	0	0	0	0	0	0	0	0	0	0	0	0	0	0	0	0	0	0	0	0	0	0	0	0	0	0	0	0	0	0.1	0	0	0	0	0
36	0	0	0	0	0	0	0	0	0	0	0	0	0	0	0	0	0	0	0	0	0	0	0	0	0	0	0	0	0	0	0	0	0	0	0	0.1	0	0	0	0
37	0	0	0	0	0	0	0	0	0	0	0	0	0	0	0	0	0	0	0	0	0	0	0	0	0	0	0	0	0	0	0	0	0	0	0	0	0.1	0	0	0
38	0	0	0	0	0	0	0	0	0	0	0	0	0	0	0	0	0	0	0	0	0	0	0	0	0	0	0	0	0	0	0	0	0	0	0	0	0	0.1	0	0
39	0	0	0	0	0	0	0	0	0	0	0	0	0	0	0	0	0	0	0	0	0	0	0	0	0	0	0	0	0	0	0	0	0	0	0	0	0	0	0.1	0
40	0	0	0	0	0	0	0	0	0	0	0	0	0	0	0	0	0	0	0	0	0	0	0	0	0	0	0	0	0	0	0	0	0	0	0	0	0	0	0	0.1
5-dimensional	341.981	-188.906	36.65	0.14908	0.20109
2	-188.906	291.326	-134.993	0.129908	-0.00285
3	36.65	-134.993	200.045	0.0652935	0.06352
4	0.14908	0.129908	0.0652935	0.147403	0.06885
5	0.20109	-0.00285	0.06352	0.06885	0.1
6-dimensional	341.988	-188.935	36.6707	0.116582	0.210345	0.02651
2	-188.935	291.44	-135.077	0.260638	-0.040078	-0.10664
3	36.6707	-135.077	200.106	-0.0304002	0.0907707	0.07806
4	0.116582	0.260638	-0.0304002	0.297686	0.0260538	-0.12259
5	0.210345	-0.040078	0.0907707	0.0260538	0.112187	0.03491
6	0.02651	-0.10664	0.07806	-0.12259	0.03491	0.1
7-dimensional	342.044	-188.858	36.6276	0.0990066	0.243151	-0.0242245	0.07514
2	-188.858	291.543	-135.135	0.236866	0.00429363	-0.175261	0.10163
3	36.6276	-135.135	200.139	-0.0169791	0.0657186	0.116803	-0.05738
4	0.0990066	0.236866	-0.0169791	0.303157	0.0158418	-0.106797	-0.02339
5	0.243151	0.00429363	0.0657186	0.0158418	0.131249	0.00543077	0.04366
6	-0.0242245	-0.175261	0.116803	-0.106797	0.00543077	0.14559	-0.06752
7	0.07514	0.10163	-0.05738	-0.02339	0.04366	-0.06752	0.1
8-dimensional	342.054	-188.857	36.6195	0.106932	0.252907	-0.0179703	0.0592451	-0.03124
2	-188.857	291.543	-135.136	0.237937	0.00561154	-0.174416	0.0994829	-0.00422
3	36.6195	-135.136	200.146	-0.023522	0.0576644	0.11164	-0.044258	0.02579
4	0.106932	0.237937	-0.023522	0.309594	0.0237648	-0.101718	-0.0362983	-0.02537
5	0.252907	0.00561154	0.0576644	0.0237648	0.141002	0.011683	0.0277702	-0.03123
6	-0.0179703	-0.174416	0.11164	-0.101718	0.011683	0.149598	-0.0777062	-0.02002
7	0.0592451	0.0994829	-0.044258	-0.0362983	0.0277702	-0.0777062	0.125888	0.05088
8	-0.03124	-0.00422	0.02579	-0.02537	-0.03123	-0.02002	0.05088	0.1
9-dimensional	342.142	-188.893	36.532	0.0524528	0.206806	0.0301782	0.000999095	-0.0551922	-0.09393
2	-188.893	291.558	-135.1	0.260401	0.0246202	-0.194269	0.123499	0.00565615	0.03873
3	36.532	-135.1	200.232	0.0305398	0.103412	0.0638604	0.0135415	0.0495586	0.09321
4	0.0524528	0.260401	0.0305398	0.343234	0.0522312	-0.131449	-0.000332456	-0.01058	0.058
5	0.206806	0.0246202	0.103412	0.0522312	0.165091	-0.0134754	0.0582047	-0.0187146	0.04908
6	0.0301782	-0.194269	0.0638604	-0.131449	-0.0134754	0.175873	-0.109493	-0.0330913	-0.05126
7	0.000999095	0.123499	0.0135415	-0.000332456	0.0582047	-0.109493	0.16434	0.0666926	0.06201
8	-0.0551922	0.00565615	0.0495586	-0.01058	-0.0187146	-0.0330913	0.0666926	0.106502	0.0255
9	-0.09393	0.03873	0.09321	0.058	0.04908	-0.05126	0.06201	0.0255	0.1
10-dimensional	342.169	-188.956	36.4716	-0.0507538	0.209782	0.0649237	-0.0313263	-0.014927	-0.0558737	0.05149
2	-188.956	291.708	-134.956	0.505579	0.0175501	-0.27681	0.200292	-0.0899981	-0.0516767	-0.12232
3	36.4716	-134.956	200.37	0.265616	0.0966331	-0.0152802	0.0871699	-0.0421544	0.00652835	-0.11728
4	-0.0507538	0.505579	0.265616	0.744996	0.0406458	-0.266706	0.125504	-0.167324	-0.0901452	-0.20044
5	0.209782	0.0175501	0.0966331	0.0406458	0.165425	-0.00957505	0.054576	-0.0141946	0.053352	0.00578
6	0.0649237	-0.27681	-0.0152802	-0.266706	-0.00957505	0.221409	-0.151856	0.0196781	-0.00138553	0.06748
7	-0.0313263	0.200292	0.0871699	0.125504	0.054576	-0.151856	0.203753	0.0175986	0.0156093	-0.06278
8	-0.014927	-0.0899981	-0.0421544	-0.167324	-0.0141946	0.0196781	0.0175986	0.167655	0.0832976	0.0782
9	-0.0558737	-0.0516767	0.00652835	-0.0901452	0.053352	-0.00138553	0.0156093	0.0832976	0.154627	0.07391
10	0.05149	-0.12232	-0.11728	-0.20044	0.00578	0.06748	-0.06278	0.0782	0.07391	0.1
11-dimensional	342.433	-188.916	36.373	0.129817	0.133637	0.0604866	-0.019868	0.0124431	0.00736668	0.295935	-0.16253
2	-188.916	291.714	-134.972	0.53332	0.00585168	-0.277492	0.202052	-0.0857931	-0.0419609	-0.0847651	-0.02497
3	36.373	-134.972	200.407	0.198234	0.125048	-0.0136244	0.082894	-0.0523679	-0.0170706	-0.208498	0.06065
4	0.129817	0.53332	0.198234	0.868428	-0.0114046	-0.269739	0.133336	-0.148615	-0.0469162	-0.0333456	-0.1111
5	0.133637	0.00585168	0.125048	-0.0114046	0.187374	-0.00829605	0.0512731	-0.0220842	0.0351227	-0.0646824	0.04685
6	0.0604866	-0.277492	-0.0136244	-0.269739	-0.00829605	0.221483	-0.152049	0.0192183	-0.00244778	0.0633741	0.00273
7	-0.019868	0.202052	0.082894	0.133336	0.0512731	-0.152049	0.20425	0.0187858	0.0183525	-0.0521768	-0.00705
8	0.0124431	-0.0857931	-0.0523679	-0.148615	-0.0220842	0.0192183	0.0187858	0.170491	0.0898501	0.103527	-0.01684
9	0.00736668	-0.0419609	-0.0170706	-0.0469162	0.0351227	-0.00244778	0.0183525	0.0898501	0.169767	0.132431	-0.03891
10	0.295935	-0.0847651	-0.208498	-0.0333456	-0.0646824	0.0633741	-0.0521768	0.103527	0.132431	0.326202	-0.1504
11	-0.16253	-0.02497	0.06065	-0.1111	0.04685	0.00273	-0.00705	-0.01684	-0.03891	-0.1504	0.1
12-dimensional	342.442	-188.927	36.3055	0.0763206	0.111142	0.0817324	-0.0323385	-0.00866479	0.0197833	0.281127	-0.158595	-0.02997
2	-188.927	291.729	-134.884	0.602757	0.03505	-0.305068	0.218239	-0.0583959	-0.0580772	-0.0655446	-0.0300776	0.0389
3	36.3055	-134.884	200.914	0.600305	0.29412	-0.173304	0.176621	0.106276	-0.110392	-0.0972016	0.0310747	0.22525
4	0.0763206	0.602757	0.600305	1.18705	0.122578	-0.396277	0.20761	-0.0228973	-0.120869	0.0548512	-0.134537	0.1785
5	0.111142	0.03505	0.29412	0.122578	0.243714	-0.0615061	0.0825055	0.0307806	0.0040253	-0.0275953	0.0369946	0.07506
6	0.0817324	-0.305068	-0.173304	-0.396277	-0.0615061	0.271737	-0.181546	-0.0307095	0.026922	0.0283473	0.0120379	-0.07089
7	-0.0323385	0.218239	0.176621	0.20761	0.0825055	-0.181546	0.221564	0.0480917	0.00111343	-0.0316173	-0.0125134	0.04161
8	-0.00866479	-0.0583959	0.106276	-0.0228973	0.0307806	-0.0307095	0.0480917	0.220095	0.0606709	0.138327	-0.0260875	0.07043
9	0.0197833	-0.0580772	-0.110392	-0.120869	0.0040253	0.026922	0.00111343	0.0606709	0.186931	0.11196	-0.0334702	-0.04143
10	0.281127	-0.0655446	-0.0972016	0.0548513	-0.0275953	0.0283473	-0.0316173	0.138327	0.11196	0.350615	-0.156888	0.04941
11	-0.158595	-0.0300776	0.0310747	-0.134537	0.0369946	0.0120379	-0.0125134	-0.0260875	-0.0334702	-0.156888	0.101724	-0.01313
12	-0.02997	0.0389	0.22525	0.1785	0.07506	-0.07089	0.04161	0.07043	-0.04143	0.04941	-0.01313	0.1
13-dimensional	342.556	-188.972	36.3409	9.38e-05	0.193829	0.182584	-0.0244334	0.0918335	0.0362566	0.0919505	-0.0450784	0.27145	0.10697
2	-188.972	291.747	-134.898	0.632779	0.00248353	-0.344788	0.215125	-0.097977	-0.0645652	0.00896228	-0.0747859	-0.0798139	-0.04213
3	36.3409	-134.898	200.925	0.576725	0.319699	-0.142107	0.179066	0.137364	-0.105296	-0.155721	0.0661898	0.318491	0.03309
4	9.38e-05	0.632779	0.576725	1.23783	0.0674935	-0.463461	0.202344	-0.0898461	-0.131843	0.180875	-0.210158	-0.0222964	-0.07126
5	0.193829	0.00248353	0.319699	0.0674935	0.303467	0.0113724	0.088218	0.103404	0.0159295	-0.1643	0.119025	0.292876	0.0773
6	0.182584	-0.344788	-0.142107	-0.463461	0.0113724	0.360625	-0.174579	0.0578666	0.0414411	-0.138387	0.112088	0.194772	0.09428
7	-0.0244334	0.215125	0.179066	0.202344	0.088218	-0.174579	0.22211	0.0550346	0.00225149	-0.0446865	-0.00467113	0.0624335	0.00739
8	0.0918335	-0.097977	0.137364	-0.0898461	0.103404	0.0578666	0.0550346	0.308361	0.0751392	-0.0278238	0.0736123	0.335162	0.09395
9	0.0362566	-0.0645652	-0.105296	-0.131843	0.0159295	0.0414411	0.00225149	0.0751392	0.189303	0.0847252	-0.0171278	0.00196412	0.0154
10	0.0919505	0.00896227	-0.155721	0.180875	-0.1643	-0.138387	-0.0446865	-0.0278238	0.0847252	0.663374	-0.344561	-0.448918	-0.17685
11	-0.0450784	-0.0747859	0.0661898	-0.210158	0.119025	0.112088	-0.00467113	0.0736123	-0.0171278	-0.344561	0.214339	0.285895	0.10612
12	0.27145	-0.0798139	0.318491	-0.0222964	0.292876	0.194772	0.0624335	0.335162	0.00196412	-0.448918	0.285895	0.894	0.28178
13	0.10697	-0.04213	0.03309	-0.07126	0.0773	0.09428	0.00739	0.09395	0.0154	-0.17685	0.10612	0.28178	0.1
14-dimensional	342.642	-189.014	36.4049	-0.0517511	0.130188	0.24101	-0.0933815	0.124618	-0.0433152	0.189096	-0.190266	0.127997	0.0909836	-0.0923
2	-189.014	291.767	-134.929	0.657881	0.0332973	-0.373077	0.248509	-0.113851	-0.0260379	-0.038074	-0.00448856	-0.0103567	-0.0343897	0.04469
3	36.4049	-134.929	200.973	0.537777	0.271889	-0.0982147	0.127269	0.161993	-0.165074	-0.0827409	-0.042882	0.210723	0.0210803	-0.06934
4	-0.0517511	0.657881	0.537777	1.26938	0.106223	-0.499017	0.244303	-0.109798	-0.0834186	0.121756	-0.121803	0.065003	-0.0615314	0.05617
5	0.130188	0.0332973	0.271889	0.106223	0.351008	-0.032273	0.139724	0.0789129	0.0753713	-0.23687	0.227484	0.400038	0.0892421	0.06895
6	0.24101	-0.373077	-0.0982147	-0.499017	-0.032273	0.400693	-0.221864	0.0803507	-0.0131299	-0.0717636	0.0125169	0.0963913	0.0833164	-0.0633
7	-0.0933815	0.248509	0.127269	0.244303	0.139724	-0.221864	0.277911	0.0285012	0.0666504	-0.123308	0.112832	0.178532	0.020328	0.0747
8	0.124618	-0.113851	0.161993	-0.109798	0.0789129	0.0803507	0.0285012	0.320977	0.0445174	0.00956105	0.0177393	0.279957	0.0877979	-0.03552
9	-0.0433152	-0.0260379	-0.165074	-0.0834186	0.0753713	-0.0131299	0.0666504	0.0445174	0.263624	-0.00601085	0.118481	0.135952	0.0303316	0.08621
10	0.189096	-0.038074	-0.0827409	0.121756	-0.23687	-0.0717636	-0.123308	0.00956105	-0.00601085	0.77415	-0.510119	-0.612497	-0.195079	-0.10525
11	-0.190266	-0.00448856	-0.042882	-0.121803	0.227484	0.0125169	0.112832	0.0177393	0.118481	-0.510119	0.461771	0.530371	0.133364	0.1573
12	0.127997	-0.0103567	0.210723	0.065003	0.400038	0.0963913	0.178532	0.279957	0.135952	-0.612497	0.530371	1.13555	0.308699	0.15542
13	0.0909836	-0.0343897	0.0210803	-0.0615314	0.0892421	0.0833164	0.020328	0.0877979	0.0303316	-0.195079	0.133364	0.308699	0.103	0.01732
14	-0.0923	0.04469	-0.06934	0.05617	0.06895	-0.0633	0.0747	-0.03552	0.08621	-0.10525	0.1573	0.15542	0.01732	0.1
15-dimensional	342.669	-189.01	36.4676	-0.016735	0.151043	0.297657	-0.00131929	0.0185257	-0.0551989	0.272818	-0.216417	0.0913121	0.174611	-0.0547277	0.05249
2	-189.01	291.767	-134.92	0.662604	0.0361102	-0.365436	0.260926	-0.128161	-0.0276408	-0.0267814	-0.00801581	-0.0153049	-0.0231098	0.0497579	0.00708
3	36.4676	-134.92	201.116	0.617475	0.319354	0.0307173	0.336807	-0.0794794	-0.192122	0.107814	-0.102402	0.127225	0.21142	0.0161766	0.11947
4	-0.016735	0.662604	0.617475	1.31388	0.132727	-0.427023	0.361306	-0.244632	-0.0985218	0.228158	-0.155038	0.0183794	0.044751	0.103921	0.06671
5	0.151043	0.0361102	0.319354	0.132727	0.366793	0.0106036	0.209406	-0.00138939	0.0663764	-0.173501	0.20769	0.372271	0.15254	0.0973887	0.03973
6	0.297657	-0.365436	0.0307173	-0.427023	0.0106036	0.517161	-0.0325832	-0.137777	-0.0375629	0.100369	-0.0412489	0.020966	0.255255	0.0139491	0.10792
7	-0.00131929	0.260926	0.336807	0.361306	0.209406	-0.0325832	0.585528	-0.325997	0.0269421	0.156439	0.0254527	0.0559522	0.299759	0.200244	0.17539
8	0.0185257	-0.128161	-0.0794794	-0.244632	-0.00138939	-0.137777	-0.325997	0.729502	0.0902774	-0.31282	0.118436	0.421219	-0.23422	-0.180197	-0.20212
9	-0.0551989	-0.0276408	-0.192122	-0.0985218	0.0663764	-0.0375629	0.0269421	0.0902774	0.26875	-0.0421216	0.12976	0.151775	-0.00573848	0.0700043	-0.02264
10	0.272818	-0.0267814	0.107814	0.228158	-0.173501	0.100369	0.156439	-0.31282	-0.0421216	1.02855	-0.589582	-0.723972	0.0590361	0.0089201	0.1595
11	-0.216417	-0.00801581	-0.102402	-0.155038	0.20769	-0.0412489	0.0254527	0.118436	0.12976	-0.589582	0.486592	0.56519	0.0539911	0.121639	-0.04982
12	0.0913121	-0.0153049	0.127225	0.0183794	0.372271	0.020966	0.0559522	0.421219	0.151775	-0.723972	0.56519	1.1844	0.19735	0.105393	-0.06989
13	0.174611	-0.0231098	0.21142	0.044751	0.15254	0.255255	0.299759	-0.23422	-0.00573848	0.0590361	0.0539911	0.19735	0.356828	0.131361	0.15932
14	-0.0547277	0.0497579	0.0161766	0.103921	0.0973887	0.0139491	0.200244	-0.180197	0.0700043	0.0089201	0.121639	0.105393	0.131361	0.151237	0.07158
15	0.05249	0.00708	0.11947	0.06671	0.03973	0.10792	0.17539	-0.20212	-0.02264	0.1595	-0.04982	-0.06989	0.15932	0.07158	0.1
16-dimensional	342.685	-189.024	36.4469	-0.0398381	0.102971	0.265797	0.0086747	0.0546458	-0.0229587	0.277298	-0.215824	0.100818	0.175444	-0.0633763	0.13269	0.04004
2	-189.024	291.78	-134.902	0.683474	0.0795359	-0.336656	0.251898	-0.16079	-0.0567649	-0.0308288	-0.00855113	-0.0238917	-0.0238622	0.0575706	-0.0653685	-0.03617
3	36.4469	-134.902	201.143	0.64737	0.381557	0.0719426	0.323876	-0.126217	-0.233839	0.102016	-0.103169	0.114925	0.210342	0.0273676	0.0156946	-0.05181
4	-0.0398381	0.683474	0.64737	1.34718	0.202001	-0.381112	0.346904	-0.296683	-0.144982	0.221701	-0.155892	0.00468139	0.0435509	0.116384	-0.0488631	-0.0577
5	0.102971	0.0795359	0.381557	0.202001	0.510937	0.106135	0.179439	-0.109696	-0.0302959	-0.186936	0.205913	0.343768	0.150043	0.123322	-0.20075	-0.12006
6	0.265797	-0.336656	0.0719426	-0.381112	0.106135	0.580475	-0.0524438	-0.209557	-0.101633	0.0914649	-0.0424265	0.00207612	0.2536	0.0311363	-0.0514587	-0.07957
7	0.0086747	0.251898	0.323876	0.346904	0.179439	-0.0524438	0.591758	-0.303481	0.0470399	0.159232	0.0258221	0.0618777	0.300279	0.194853	0.225385	0.02496
8	0.0546458	-0.16079	-0.126217	-0.296683	-0.109696	-0.209557	-0.303481	0.810881	0.162914	-0.302726	0.119771	0.442635	-0.232343	-0.199683	-0.0214294	0.09021
9	-0.0229587	-0.0567649	-0.233839	-0.144982	-0.0302959	-0.101633	0.0470399	0.162914	0.333585	-0.0331115	0.130952	0.17089	-0.00406366	0.052612	0.138642	0.08052
10	0.277298	-0.0308288	0.102016	0.221701	-0.186936	0.0914649	0.159232	-0.302726	-0.0331115	1.0298	-0.589416	-0.721316	0.0592689	0.00650306	0.181914	0.01119
11	-0.215824	-0.00855113	-0.103169	-0.155892	0.205913	-0.0424265	0.0258221	0.119771	0.130952	-0.589416	0.486614	0.565541	0.0540219	0.121319	-0.0468556	0.00148
12	0.100818	-0.0238917	0.114925	0.00468139	0.343768	0.00207612	0.0618777	0.442635	0.17089	-0.721316	0.565541	1.19004	0.197844	0.100265	-0.0223388	0.02374
13	0.175444	-0.0238622	0.210342	0.0435509	0.150043	0.2536	0.300279	-0.232343	-0.00406366	0.0592689	0.0540219	0.197844	0.356872	0.130912	0.163486	0.00208
14	-0.0633763	0.0575706	0.0273676	0.116384	0.123322	0.0311363	0.194853	-0.199683	0.052612	0.00650306	0.121319	0.100265	0.130912	0.155903	0.0283152	-0.0216
15	0.13269	-0.0653685	0.0156946	-0.0488631	-0.20075	-0.0514587	0.225385	-0.0214294	0.138642	0.181914	-0.0468556	-0.0223388	0.163486	0.0283152	0.501201	0.2003
16	0.04004	-0.03617	-0.05181	-0.0577	-0.12006	-0.07957	0.02496	0.09021	0.08052	0.01119	0.00148	0.02374	0.00208	-0.0216	0.2003	0.1
17-dimensional	342.723	-188.938	36.4418	-0.0862659	0.157789	0.442749	0.135357	0.0866923	-0.0118367	0.308307	-0.215217	0.0320966	0.136805	-0.101008	0.0942847	0.0451652	-0.06138
2	-188.938	291.981	-134.913	0.576429	0.205927	0.0713321	0.543981	-0.0869024	-0.0311215	0.0406671	-0.00715008	-0.182337	-0.112949	-0.0291953	-0.153918	-0.0243531	-0.14152
3	36.4418	-134.913	201.143	0.653595	0.374207	0.0482163	0.30689	-0.130514	-0.23533	0.0978584	-0.10325	0.12414	0.215523	0.0324134	0.0208441	-0.0524972	0.00823
4	-0.0862659	0.576429	0.653595	1.40439	0.134447	-0.599174	0.19079	-0.336175	-0.158688	0.183488	-0.15664	0.0893679	0.0911662	0.162759	-0.00153515	-0.0640159	0.07564
5	0.157789	0.205927	0.374207	0.134447	0.590699	0.363607	0.363766	-0.0630668	-0.0141129	-0.141816	0.206798	0.243777	0.0938221	0.0685657	-0.256631	-0.112603	-0.08931
6	0.442749	0.0713321	0.0482163	-0.599174	0.363607	1.41159	0.542558	-0.0590411	-0.0493946	0.237109	-0.0395724	-0.320693	0.072121	-0.145614	-0.231842	-0.0554978	-0.28829
7	0.135357	0.543981	0.30689	0.19079	0.363766	0.542558	1.01773	-0.195724	0.0844377	0.2635	0.0278653	-0.169197	0.170356	0.0683151	0.0962467	0.0421936	-0.20639
8	0.0866923	-0.0869024	-0.130514	-0.336175	-0.0630668	-0.0590411	-0.195724	0.83814	0.172375	-0.276349	0.120287	0.38418	-0.265209	-0.231693	-0.0540972	0.0945695	-0.05221
9	-0.0118367	-0.0311215	-0.23533	-0.158688	-0.0141129	-0.0493946	0.0844377	0.172375	0.336868	-0.0239572	0.131131	0.150603	-0.0154702	0.0415026	0.127304	0.082033	-0.01812
10	0.308307	0.0406671	0.0978584	0.183488	-0.141816	0.237109	0.2635	-0.276349	-0.0239572	1.05533	-0.588916	-0.777878	0.0274665	-0.0244708	0.150303	0.0154084	-0.05052
11	-0.215217	-0.00715008	-0.10325	-0.15664	0.206798	-0.0395724	0.0278653	0.120287	0.131131	-0.588916	0.486623	0.564433	0.0533987	0.120712	-0.047475	0.00156267	-0.00099
12	0.0320966	-0.182337	0.12414	0.0893679	0.243777	-0.320693	-0.169197	0.38418	0.150603	-0.777878	0.564433	1.31539	0.268323	0.168908	0.0477146	0.0143913	0.11196
13	0.136805	-0.112949	0.215523	0.0911662	0.0938221	0.072121	0.170356	-0.265209	-0.0154702	0.0274665	0.0533987	0.268323	0.396499	0.169507	0.202874	-0.00317633	0.06295
14	-0.101008	-0.0291953	0.0324134	0.162759	0.0685657	-0.145614	0.0683151	-0.231693	0.0415026	-0.0244708	0.120712	0.168908	0.169507	0.193492	0.0666769	-0.0267194	0.06131
15	0.0942847	-0.153918	0.0208441	-0.00153515	-0.256631	-0.231842	0.0962467	-0.0540972	0.127304	0.150303	-0.047475	0.0477146	0.202874	0.0666769	0.540351	0.195075	0.06257
16	0.0451652	-0.0243531	-0.0524972	-0.0640159	-0.112603	-0.0554978	0.0421936	0.0945695	0.082033	0.0154084	0.00156267	0.0143913	-0.00317633	-0.0267194	0.195075	0.100697	-0.00835
17	-0.06138	-0.14152	0.00823	0.07564	-0.08931	-0.28829	-0.20639	-0.05221	-0.01812	-0.05052	-0.00099	0.11196	0.06295	0.06131	0.06257	-0.00835	0.1
18-dimensional	343.056	-189.121	36.6815	-0.0589837	0.118262	0.624181	0.0313558	0.228414	0.0917082	0.279912	-0.273413	0.101698	0.438607	-0.123893	0.0650133	0.308115	-0.0361781	0.18249
2	-189.121	292.081	-135.045	0.561444	0.227637	-0.0283165	0.601102	-0.164741	-0.087992	0.0562629	0.0248133	-0.220565	-0.278709	-0.0166265	-0.137841	-0.168774	-0.155362	-0.10023
3	36.6815	-135.045	201.316	0.673232	0.345757	0.178804	0.232033	-0.0285077	-0.160802	0.0774204	-0.145138	0.174237	0.43275	0.0159421	-0.000224459	0.136765	0.0263694	0.13135
4	-0.0589837	0.561444	0.673232	1.40662	0.131209	-0.584311	0.18227	-0.324565	-0.150205	0.181162	-0.161408	0.0950699	0.115891	0.160884	-0.00393313	-0.0424745	0.0777046	0.01495
5	0.118262	0.227637	0.345757	0.131209	0.595391	0.342073	0.37611	-0.0798879	-0.0264028	-0.138446	0.213705	0.235516	0.0580008	0.0712819	-0.253157	-0.143813	-0.0923012	-0.02166
6	0.624181	-0.0283165	0.178804	-0.584311	0.342073	1.51043	0.485898	0.0181685	0.00701635	0.221639	-0.0712775	-0.282775	0.236542	-0.158082	-0.247789	0.0877565	-0.27456	0.09942
7	0.0313558	0.601102	0.232033	0.18227	0.37611	0.485898	1.0502	-0.239983	0.0521016	0.272368	0.0460395	-0.190933	0.076106	0.0754616	0.105388	-0.0399233	-0.21426	-0.05699
8	0.228414	-0.164741	-0.0285077	-0.324565	-0.0798879	0.0181685	-0.239983	0.89845	0.216439	-0.288433	0.0955217	0.4138	-0.136775	-0.241431	-0.0665538	0.20647	-0.0414852	0.07766
9	0.0917082	-0.087992	-0.160802	-0.150205	-0.0264028	0.00701635	0.0521016	0.216439	0.369062	-0.032786	0.113037	0.172244	0.0783664	0.0343874	0.118203	0.16379	-0.0102842	0.05674
10	0.279912	0.0562629	0.0774204	0.181162	-0.138446	0.221639	0.272368	-0.288433	-0.032786	1.05775	-0.583954	-0.783812	0.00173338	-0.0225195	0.152799	-0.00701198	-0.0526688	-0.01556
11	-0.273413	0.0248133	-0.145138	-0.161408	0.213705	-0.0712775	0.0460395	0.0955217	0.113037	-0.583954	0.496793	0.55227	0.000659033	0.124711	-0.0423598	-0.0443876	-0.00539401	-0.03189
12	0.101698	-0.220565	0.174237	0.0950699	0.235516	-0.282775	-0.190933	0.4138	0.172244	-0.783812	0.55227	1.32993	0.331399	0.164125	0.0415969	0.0693473	0.117227	0.03814
13	0.438607	-0.278709	0.43275	0.115891	0.0580008	0.236542	0.076106	-0.136775	0.0783664	0.00173338	0.000659033	0.331399	0.670004	0.148768	0.176347	0.23512	0.085789	0.16538
14	-0.123893	-0.0166265	0.0159421	0.160884	0.0712819	-0.158082	0.0754616	-0.241431	0.0343874	-0.0225195	0.124711	0.164125	0.148768	0.195064	0.0686883	-0.0447883	0.0595782	-0.01254
15	0.0650133	-0.137841	-0.000224459	-0.00393313	-0.253157	-0.247789	0.105388	-0.0665538	0.118203	0.152799	-0.0423598	0.0415969	0.176347	0.0686883	0.542924	0.171963	0.0603549	-0.01604
16	0.308115	-0.168774	0.136765	-0.0424745	-0.143813	0.0877565	-0.0399233	0.20647	0.16379	-0.00701198	-0.0443876	0.0693473	0.23512	-0.0447883	0.171963	0.308317	0.0115488	0.14409
17	-0.0361781	-0.155362	0.0263694	0.0777046	-0.0923012	-0.27456	-0.21426	-0.0414852	-0.0102842	-0.0526688	-0.00539401	0.117227	0.085789	0.0595782	0.0603549	0.0115488	0.101907	0.01381
18	0.18249	-0.10023	0.13135	0.01495	-0.02166	0.09942	-0.05699	0.07766	0.05674	-0.01556	-0.03189	0.03814	0.16538	-0.01254	-0.01604	0.14409	0.01381	0.1
19-dimensional	343.263	-189.059	36.5958	-0.0105301	0.0768618	0.61147	-0.00840316	0.189965	-0.00535733	0.1598	-0.190267	-0.0590939	0.752029	-0.21543	0.13182	0.469138	0.0128224	0.305682	0.14395
2	-189.059	292.1	-135.071	0.575867	0.215314	-0.0321002	0.589267	-0.176186	-0.116886	0.0205089	0.0495634	-0.268429	-0.185412	-0.0438748	-0.117954	-0.120842	-0.140776	-0.063559	0.04285
3	36.5958	-135.071	201.351	0.653194	0.362878	0.184061	0.248476	-0.0126072	-0.120661	0.127092	-0.179522	0.240732	0.303135	0.0537972	-0.0278523	0.0701748	0.00610542	0.0804042	-0.05953
4	-0.0105301	0.575867	0.653194	1.41795	0.121528	-0.587283	0.172974	-0.333555	-0.172902	0.153076	-0.141966	0.0574716	0.189178	0.13948	0.0116885	-0.00482241	0.0891625	0.0437562	0.03366
5	0.0768618	0.215314	0.362878	0.121528	0.603662	0.344612	0.384054	-0.0722061	-0.00700993	-0.114448	0.197093	0.267641	-0.00461837	0.0895704	-0.266505	-0.175983	-0.102091	-0.0462728	-0.02876
6	0.61147	-0.0321002	0.184061	-0.587283	0.344612	1.51121	0.488337	0.020527	0.0129704	0.229007	-0.0763777	-0.272911	0.217316	-0.152467	-0.251887	0.0778793	-0.277566	0.0918633	-0.00883
7	-0.00840316	0.589267	0.248476	0.172974	0.384054	0.488337	1.05783	-0.232606	0.0707258	0.295414	0.0300861	-0.160081	0.015969	0.0930252	0.0925694	-0.0708191	-0.223662	-0.0806272	-0.02762
8	0.189965	-0.176186	-0.0126072	-0.333555	-0.0722061	0.020527	-0.232606	0.905585	0.23445	-0.266146	0.080094	0.443635	-0.194931	-0.224446	-0.0789499	0.176592	-0.0505772	0.0548016	-0.02671
9	-0.00535733	-0.116886	-0.120661	-0.172902	-0.00700993	0.0129704	0.0707258	0.23445	0.414531	0.0234776	0.0740889	0.247563	-0.0684489	0.0772661	0.0869085	0.0883625	-0.0332374	-0.000966594	-0.06743
10	0.1598	0.0205089	0.127092	0.153076	-0.114448	0.229007	0.295414	-0.266146	0.0234776	1.12737	-0.632149	-0.69061	-0.179941	0.03054	0.114075	-0.100348	-0.0810718	-0.086968	-0.08344
11	-0.190267	0.0495634	-0.179522	-0.141966	0.197093	-0.0763777	0.0300861	0.080094	0.0740889	-0.632149	0.530155	0.487752	0.12642	0.0879816	-0.0155534	0.0202227	0.0142675	0.017541	0.05776
12	-0.0590939	-0.268429	0.240732	0.0574716	0.267641	-0.272911	-0.160081	0.443635	0.247563	-0.69061	0.487752	1.4547	0.0881941	0.235155	-0.010243	-0.0556004	0.0792045	-0.0574529	-0.1117
13	0.752029	-0.185412	0.303135	0.189178	-0.00461837	0.217316	0.015969	-0.194931	-0.0684489	-0.179941	0.12642	0.0881941	1.14407	0.0103135	0.277396	0.478672	0.159904	0.351713	0.21773
14	-0.21543	-0.0438748	0.0537972	0.13948	0.0895704	-0.152467	0.0930252	-0.224446	0.0772661	0.03054	0.0879816	0.235155	0.0103135	0.235501	0.0391762	-0.11592	0.0379322	-0.0669603	-0.06359
15	0.13182	-0.117954	-0.0278523	0.0116885	-0.266505	-0.251887	0.0925694	-0.0789499	0.0869085	0.114075	-0.0155534	-0.010243	0.277396	0.0391762	0.564463	0.223878	0.0761528	0.0236777	0.04641
16	0.469138	-0.120842	0.0701748	-0.00482241	-0.175983	0.0778793	-0.0708191	0.176592	0.0883625	-0.100348	0.0202227	-0.0556004	0.478672	-0.11592	0.223878	0.433443	0.049626	0.23982	0.11186
17	0.0128224	-0.140776	0.00610542	0.0891625	-0.102091	-0.277566	-0.223662	-0.0505772	-0.0332374	-0.0810718	0.0142675	0.0792045	0.159904	0.0379322	0.0761528	0.049626	0.113494	0.0429414	0.03404
18	0.305682	-0.063559	0.0804042	0.0437562	-0.0462728	0.0918633	-0.0806272	0.0548016	-0.000966594	-0.086968	0.017541	-0.0574529	0.351713	-0.0669603	0.0236777	0.23982	0.0429414	0.173239	0.08558
19	0.14395	0.04285	-0.05953	0.03366	-0.02876	-0.00883	-0.02762	-0.02671	-0.06743	-0.08344	0.05776	-0.1117	0.21773	-0.06359	0.04641	0.11186	0.03404	0.08558	0.1
20-dimensional	343.263	-189.053	36.6105	0.00565813	0.0738345	0.611647	-0.0033794	0.204167	-0.00366782	0.159938	-0.200317	-0.0549393	0.766363	-0.22251	0.130915	0.465073	0.00991028	0.315862	0.148625	0.00597
2	-189.053	292.205	-134.817	0.854864	0.163138	-0.0290547	0.675849	0.0685788	-0.0877679	0.0228856	-0.123642	-0.196827	0.0616268	-0.165892	-0.133562	-0.1909	-0.190965	0.111879	0.123423	0.10289
3	36.6105	-134.817	201.956	1.32017	0.238146	0.191342	0.455459	0.572531	-0.0510519	0.132774	-0.593588	0.411902	0.893709	-0.237899	-0.065166	-0.0973062	-0.113879	0.499808	0.133089	0.24597
4	0.00565813	0.854864	1.32017	2.15323	-0.0159768	-0.579257	0.401155	0.311507	-0.0961638	0.15934	-0.598437	0.246172	0.840234	-0.182089	-0.0294465	-0.189455	-0.0431094	0.506111	0.246005	0.27116
5	0.0738345	0.163138	0.238146	-0.0159768	0.629377	0.343111	0.341381	-0.19284	-0.0213609	-0.11562	0.282458	0.232352	-0.126373	0.149707	-0.258812	-0.141455	-0.0773548	-0.132738	-0.068471	-0.05071
6	0.611647	-0.0290547	0.191342	-0.579257	0.343111	1.5113	0.490828	0.0275685	0.0138081	0.229075	-0.0813605	-0.270852	0.224423	-0.155977	-0.252336	0.0758638	-0.27901	0.0969104	-0.00651202	0.00296
7	-0.00337941	0.675849	0.455459	0.401155	0.341381	0.490828	1.12865	-0.0324211	0.0945402	0.297358	-0.111572	-0.101521	0.218013	-0.00676829	0.0798039	-0.128117	-0.264711	0.062857	0.0382779	0.08415
8	0.204167	0.0685788	0.572531	0.311507	-0.19284	0.0275685	-0.0324211	1.4715	0.301773	-0.260651	-0.32037	0.609183	0.376243	-0.50656	-0.115038	0.0146127	-0.16662	0.460428	0.159582	0.23789
9	-0.00366782	-0.0877679	-0.0510519	-0.0961638	-0.0213609	0.0138081	0.0945402	0.301773	0.422539	0.0241313	0.0264487	0.267257	-0.000500627	0.0437052	0.0826154	0.069093	-0.0470421	0.0472877	-0.0452683	0.0283
10	0.159938	0.0228856	0.132774	0.15934	-0.11562	0.229075	0.297358	-0.260651	0.0241313	1.12742	-0.636038	-0.689002	-0.174394	0.0278005	0.113724	-0.101921	-0.0821986	-0.0830292	-0.081631	0.00231
11	-0.200317	-0.123642	-0.593588	-0.598437	0.282458	-0.0813605	-0.111572	-0.32037	0.0264487	-0.636038	0.813539	0.370604	-0.277764	0.287616	0.00998375	0.134845	0.0963837	-0.269496	-0.0740671	-0.16834
12	-0.0549393	-0.196827	0.411902	0.246172	0.232352	-0.270852	-0.101521	0.609183	0.267257	-0.689002	0.370604	1.50313	0.25528	0.152628	-0.0207998	-0.102984	0.0452585	0.061205	-0.0572041	0.06959
13	0.766363	0.0616268	0.893709	0.840234	-0.126373	0.224423	0.218013	0.376243	-0.000500627	-0.174394	-0.277764	0.25528	1.72055	-0.274421	0.240972	0.315188	0.0427835	0.761108	0.405752	0.2401
14	-0.22251	-0.165892	-0.237899	-0.182089	0.149707	-0.155977	-0.00676829	-0.50656	0.0437052	0.0278005	0.287616	0.152628	-0.274421	0.376137	0.0571663	-0.0351721	0.0957804	-0.269168	-0.156458	-0.11859
15	0.130915	-0.133562	-0.065166	-0.0294465	-0.258812	-0.252336	0.0798039	-0.115038	0.0826154	0.113724	0.00998375	-0.0207998	0.240972	0.0571663	0.566764	0.234207	0.0835528	-0.00218869	0.0345304	-0.01517
16	0.465073	-0.1909	-0.0973062	-0.189455	-0.141455	0.0758638	-0.128117	0.0146127	0.069093	-0.101921	0.134845	-0.102984	0.315188	-0.0351721	0.234207	0.479806	0.0828403	0.12372	0.0585387	-0.06809
17	0.00991028	-0.190965	-0.113879	-0.0431094	-0.0773548	-0.27901	-0.264711	-0.16662	-0.0470421	-0.0821986	0.0963837	0.0452585	0.0427835	0.0957804	0.0835528	0.0828403	0.137289	-0.0402333	-0.00415962	-0.04878
18	0.315862	0.111879	0.499808	0.506111	-0.132738	0.0969104	0.062857	0.460428	0.0472877	-0.0830292	-0.269496	0.061205	0.761108	-0.269168	-0.00218869	0.12372	-0.0402333	0.463976	0.219106	0.17051
19	0.148625	0.123423	0.133089	0.246005	-0.068471	-0.00651202	0.0382779	0.159582	-0.0452683	-0.081631	-0.0740671	-0.0572041	0.405752	-0.156458	0.0345304	0.0585387	-0.00415962	0.219106	0.161325	0.07831
20	0.00597	0.10289	0.24597	0.27116	-0.05071	0.00296	0.08415	0.23789	0.0283	0.00231	-0.16834	0.06959	0.2401	-0.11859	-0.01517	-0.06809	-0.04878	0.17051	0.07831	0.1
21-dimensional	343.319	-189.117	36.4975	0.0872271	0.0346297	0.758047	-0.0192361	0.289112	0.0229741	0.227413	-0.182787	-0.133678	0.862512	-0.267571	0.143724	0.518715	0.0479424	0.18018	0.105813	-0.116708	0.07469
2	-189.117	292.278	-134.688	0.761555	0.207985	-0.196526	0.693988	-0.0285921	-0.118244	-0.0543009	-0.143694	-0.106757	-0.0483601	-0.114346	-0.148215	-0.252263	-0.234471	0.267089	0.172397	0.243225	-0.08544
3	36.4975	-134.688	202.185	1.15496	0.317548	-0.105163	0.487574	0.400491	-0.10501	-0.00388321	-0.629091	0.571371	0.698979	-0.146637	-0.0911088	-0.205948	-0.190905	0.774605	0.219797	0.494431	-0.15127
4	0.0872271	0.761555	1.15496	2.2725	-0.0733012	-0.365194	0.377969	0.435712	-0.0572086	0.258	-0.572805	0.131043	0.98082	-0.247975	-0.010717	-0.111021	0.0125003	0.30772	0.183406	0.0917826	0.10921
5	0.0346297	0.207985	0.317548	-0.0733012	0.656929	0.240226	0.352525	-0.252537	-0.040084	-0.163039	0.270139	0.287687	-0.193943	0.181375	-0.267814	-0.179153	-0.104083	-0.0373851	-0.0383837	0.0355048	-0.05249
6	0.758047	-0.196526	-0.105163	-0.365194	0.240226	1.8955	0.449215	0.250491	0.0837249	0.406151	-0.035357	-0.477485	0.476747	-0.27423	-0.21872	0.216638	-0.179201	-0.259161	-0.118865	-0.318986	0.19601
7	-0.0192361	0.693988	0.487574	0.377969	0.352525	0.449215	1.13315	-0.056566	0.0869675	0.278178	-0.116555	-0.0791403	0.190684	0.00603977	0.0761629	-0.143364	-0.275521	0.101423	0.0504469	0.11902	-0.02123
8	0.289112	-0.0285921	0.400491	0.435712	-0.252537	0.250491	-0.056566	1.60085	0.34234	-0.157907	-0.293678	0.489288	0.522647	-0.575174	-0.0955332	0.0962936	-0.108709	0.253826	0.0943916	0.0510885	0.11373
9	0.0229741	-0.118244	-0.10501	-0.0572086	-0.040084	0.0837249	0.0869675	0.34234	0.435263	0.0563556	0.0348205	0.229654	0.0454174	0.0221855	0.0887328	0.0947112	-0.028879	-0.0175104	-0.0657143	-0.030288	0.03567
10	0.227413	-0.0543009	-0.00388321	0.258	-0.163039	0.406151	0.278178	-0.157907	0.0563556	1.20904	-0.614835	-0.784239	-0.0580995	-0.0267016	0.129217	-0.0370387	-0.0361975	-0.247141	-0.133414	-0.146073	0.09034
11	-0.182787	-0.143694	-0.629091	-0.572805	0.270139	-0.035357	-0.116555	-0.293678	0.0348205	-0.614835	0.819047	0.345862	-0.247552	0.273457	0.0140089	0.151702	0.108335	-0.312131	-0.0875201	-0.206889	0.02347
12	-0.133678	-0.106757	0.571371	0.131043	0.287687	-0.477485	-0.0791403	0.489288	0.229654	-0.784239	0.345862	1.61426	0.119573	0.216228	-0.0388794	-0.178697	-0.00842141	0.252711	0.00322267	0.242742	-0.10542
13	0.862512	-0.0483601	0.698979	0.98082	-0.193943	0.476747	0.190684	0.522647	0.0454174	-0.0580995	-0.247552	0.119573	1.88626	-0.352084	0.26305	0.407642	0.108333	0.527257	0.331964	0.028661	0.12873
14	-0.267571	-0.114346	-0.146637	-0.247975	0.181375	-0.27423	0.00603977	-0.575174	0.0221855	-0.0267016	0.273457	0.216228	-0.352084	0.412534	0.0468197	-0.0785011	0.0650604	-0.159573	-0.121877	-0.019498	-0.06033
15	0.143724	-0.148215	-0.0911088	-0.010717	-0.267814	-0.21872	0.0761629	-0.0955332	0.0887328	0.129217	0.0140089	-0.0388794	0.26305	0.0468197	0.569705	0.246524	0.0922855	-0.0333434	0.0247	-0.0433389	0.01715
16	0.518715	-0.252263	-0.205948	-0.111021	-0.179153	0.216638	-0.143364	0.0962936	0.0947112	-0.0370387	0.151702	-0.178697	0.407642	-0.0785011	0.246524	0.531387	0.119411	-0.00674868	0.0173715	-0.186054	0.07182
17	0.0479424	-0.234471	-0.190905	0.0125003	-0.104083	-0.179201	-0.275521	-0.108709	-0.028879	-0.0361975	0.108335	-0.00842141	0.108333	0.0650604	0.0922855	0.119411	0.163218	-0.132735	-0.033347	-0.132416	0.05092
18	0.18018	0.267089	0.774605	0.30772	-0.0373851	-0.259161	0.101423	0.253826	-0.0175104	-0.247141	-0.312131	0.252711	0.527257	-0.159573	-0.0333434	-0.00674868	-0.132735	0.79398	0.323234	0.468887	-0.18166
19	0.105813	0.172397	0.219797	0.183406	-0.0383837	-0.118865	0.0504469	0.0943916	-0.0657143	-0.133414	-0.0875201	0.00322267	0.331964	-0.121877	0.0247	0.0173715	-0.033347	0.323234	0.19418	0.172458	-0.05732
20	-0.116708	0.243225	0.494431	0.0917826	0.0355048	-0.318986	0.11902	0.0510885	-0.030288	-0.146073	-0.206889	0.242742	0.028661	-0.019498	-0.0433389	-0.186054	-0.132416	0.468887	0.172458	0.369781	-0.16425
21	0.07469	-0.08544	-0.15127	0.10921	-0.05249	0.19601	-0.02123	0.11373	0.03567	0.09034	0.02347	-0.10542	0.12873	-0.06033	0.01715	0.07182	0.05092	-0.18166	-0.05732	-0.16425	0.1
22-dimensional	343.612	-188.898	36.7024	-0.0471713	0.161254	0.8276	-0.0796974	0.353512	-0.268031	0.19517	-0.329805	-0.100116	0.772479	-0.201339	-0.080981	0.591214	0.151554	0.431409	-0.0643385	-0.464357	0.138644	-0.17123
2	-188.898	292.441	-134.536	0.661504	0.30225	-0.144747	0.648978	0.0193494	-0.33488	-0.0783035	-0.25314	-0.0817725	-0.115384	-0.0650407	-0.315494	-0.198292	-0.157339	0.454113	0.0457304	-0.0155771	-0.03783	-0.12747
3	36.7024	-134.536	202.328	1.06107	0.406007	-0.056573	0.445336	0.44548	-0.308304	-0.0264077	-0.731797	0.594817	0.636083	-0.100368	-0.248086	-0.155301	-0.118523	0.950111	0.100931	0.251566	-0.106592	-0.11962
4	-0.0471713	0.661504	1.06107	2.33411	-0.131345	-0.397077	0.405684	0.406192	0.0761852	0.27278	-0.505414	0.115659	1.02209	-0.278335	0.0922854	-0.144253	-0.034994	0.19256	0.261402	0.251141	0.079894	0.07849
5	0.161254	0.30225	0.406007	-0.131345	0.711615	0.270264	0.326413	-0.224724	-0.165762	-0.176964	0.206645	0.302181	-0.232826	0.209978	-0.364859	-0.147843	-0.0593356	0.0711143	-0.111868	-0.114636	-0.0248697	-0.07395
6	0.8276	-0.144747	-0.056573	-0.397077	0.270264	1.912	0.434872	0.265768	0.0146912	0.398502	-0.0702333	-0.469524	0.455389	-0.258518	-0.272026	0.233837	-0.154622	-0.199564	-0.159229	-0.401457	0.211182	-0.04062
7	-0.0796974	0.648978	0.445336	0.405684	0.326413	0.434872	1.14562	-0.0698461	0.146977	0.284827	-0.0862375	-0.0860611	0.20925	-0.00761814	0.1225	-0.158314	-0.296887	0.0496166	0.0855344	0.19071	-0.0344183	0.03531
8	0.353512	0.0193494	0.44548	0.406192	-0.224724	0.265768	-0.0698461	1.61499	0.278422	-0.164989	-0.32597	0.49666	0.502872	-0.560626	-0.144889	0.112218	-0.0859509	0.309007	0.0570186	-0.0252711	0.127777	-0.03761
9	-0.268031	-0.33488	-0.308304	0.0761852	-0.165762	0.0146912	0.146977	0.278422	0.724093	0.0883572	0.18074	0.196343	0.134777	-0.0435512	0.311758	0.0227544	-0.131716	-0.266861	0.103165	0.314762	-0.0278063	0.16995
10	0.19517	-0.0783035	-0.0264077	0.27278	-0.176964	0.398502	0.284827	-0.164989	0.0883572	1.21258	-0.598667	-0.787929	-0.0481987	-0.033985	0.153928	-0.0450113	-0.0475915	-0.274768	-0.114703	-0.107843	0.083307	0.01883
11	-0.329805	-0.25314	-0.731797	-0.505414	0.206645	-0.0702333	-0.0862375	-0.32597	0.18074	-0.598667	0.892767	0.329034	-0.202406	0.240246	0.126683	0.115348	0.0563808	-0.438105	-0.00220098	-0.0325679	-0.00859871	0.08586
12	-0.100116	-0.0817725	0.594817	0.115659	0.302181	-0.469524	-0.0860611	0.49666	0.196343	-0.787929	0.329034	1.6181	0.109267	0.223809	-0.0646004	-0.170398	0.00343855	0.281468	-0.0162538	0.202948	-0.0980994	-0.0196
13	0.772479	-0.115384	0.636083	1.02209	-0.232826	0.455389	0.20925	0.502872	0.134777	-0.0481987	-0.202406	0.109267	1.91391	-0.372422	0.33205	0.38538	0.0765166	0.450112	0.384213	0.135414	0.109091	0.05258
14	-0.201339	-0.0650407	-0.100368	-0.278335	0.209978	-0.258518	-0.00761814	-0.560626	-0.0435512	-0.033985	0.240246	0.223809	-0.372422	0.427496	-0.00394009	-0.062124	0.0884656	-0.102821	-0.160313	-0.09803	-0.045883	-0.03868
15	-0.080981	-0.315494	-0.248086	0.0922854	-0.364859	-0.272026	0.1225	-0.144889	0.311758	0.153928	0.126683	-0.0646004	0.33205	-0.00394009	0.741918	0.190961	0.0128783	-0.225884	0.155103	0.223097	-0.0318644	0.13123
16	0.591214	-0.198292	-0.155301	-0.144253	-0.147843	0.233837	-0.158314	0.112218	0.0227544	-0.0450113	0.115348	-0.170398	0.38538	-0.062124	0.190961	0.549313	0.145031	0.0553726	-0.0247018	-0.272017	0.087634	-0.04234
17	0.151554	-0.157339	-0.118523	-0.034994	-0.0593356	-0.154622	-0.296887	-0.0859509	-0.131716	-0.0475915	0.0563808	0.00343855	0.0765166	0.0884656	0.0128783	0.145031	0.199832	-0.0439543	-0.0934757	-0.25527	0.0735205	-0.06051
18	0.431409	0.454113	0.950111	0.19256	0.0711143	-0.199564	0.0496166	0.309007	-0.266861	-0.274768	-0.438105	0.281468	0.450112	-0.102821	-0.225884	0.0553726	-0.0439543	1.00925	0.177438	0.171001	-0.12686	-0.14672
19	-0.0643385	0.0457304	0.100931	0.261402	-0.111868	-0.159229	0.0855344	0.0570186	0.103165	-0.114703	-0.00220098	-0.0162538	0.384213	-0.160313	0.155103	-0.0247018	-0.0934757	0.177438	0.292924	0.374209	-0.0944347	0.09937
20	-0.464357	-0.0155771	0.251566	0.251141	-0.114636	-0.401457	0.19071	-0.0252711	0.314762	-0.107843	-0.0325679	0.202948	0.135414	-0.09803	0.223097	-0.272017	-0.25527	0.171001	0.374209	0.781992	-0.240082	0.20303
21	0.138644	-0.03783	-0.106592	0.079894	-0.0248697	0.211182	-0.0344183	0.127777	-0.0278063	0.083307	-0.00859871	-0.0980994	0.109091	-0.045883	-0.0318644	0.087634	0.0735205	-0.12686	-0.0944347	-0.240082	0.11395	-0.03735
22	-0.17123	-0.12747	-0.11962	0.07849	-0.07395	-0.04062	0.03531	-0.03761	0.16995	0.01883	0.08586	-0.0196	0.05258	-0.03868	0.13123	-0.04234	-0.06051	-0.14672	0.09937	0.20303	-0.03735	0.1
23-dimensional	118070	35683.8	1346.81	0.00220215	0.0263901	0.691218	0.00615691	0.127123	0.0708254	0.0392424	0.106628	0.00999722	0.600042	0.0391639	0.00618099	0.348516	0.0242254	0.189131	0.00424772	0.215289	0.0185712	0.02888	8.0656e-06
2	35683.8	85596.7	18063.3	0.424801	0.0648094	0.0876336	0.359869	0.0103004	0.168634	0.0380119	0.14696	0.00756358	0.0403528	0.0408781	0.167805	0.0268815	0.102675	0.0993824	0.0062504	0.000906129	0.00320083	0.0319854	0.0128165
3	1346.81	18063.3	40995.2	1.10405	0.126306	0.0471684	0.154623	0.100609	0.151124	0.0225791	0.756969	0.347274	0.297369	0.0604995	0.121129	0.0141248	0.0850709	0.644305	0.0185817	0.055765	4.05195e-05	0.0303325	0.0144456
4	0.00220215	0.424801	1.10405	5.45151	0.0163132	0.148676	0.167619	0.172533	0.00671435	0.0793223	0.245542	0.0134684	1.05799	0.0717795	0.00988776	0.0215684	0.000510977	0.0412531	0.0670136	0.0636271	0.00528855	0.00678855	7.396e-05
5	0.0263901	0.0648094	0.126306	0.0163132	0.531948	0.106626	0.118799	0.0323195	0.0189277	0.0178409	0.065066	0.0924852	0.040411	0.068116	0.108794	0.0257971	1.76383e-06	0.0150716	0.0154418	0.0119319	0.00359822	0.00300748	0.00177325
6	0.691218	0.0876336	0.0471684	0.148676	0.106626	4.37046	0.242866	0.166794	0.010843	0.287519	0.00696689	0.21473	0.309477	0.009339	0.0258885	0.0373675	0.00143528	0.00127115	0.0394299	0.147696	0.00994957	0.000400852	0.017857
7	0.00615691	0.359869	0.154623	0.167619	0.118799	0.242866	1.35588	0.000555245	0.0309752	0.108577	0.0013224	0.00706791	0.0585617	0.00201674	0.0251408	0.0294004	0.0549539	0.0105682	0.00529537	0.0385232	0.004981	0.00302354	0.00188009
8	0.127123	0.0103004	0.100609	0.172533	0.0323195	0.166794	0.000555245	2.98918	0.122404	0.00302433	0.0412891	0.251562	0.340451	0.186038	0.00314988	0.00637497	0.00459939	0.193542	0.000655069	0.000134012	0.00150287	0.000117259	0.0113934
9	0.0708254	0.168634	0.151124	0.00671435	0.0189277	0.010843	0.0309752	0.122404	0.591191	0.0247523	0.0664209	0.0397666	0.0343445	0.00140834	0.134995	6.02463e-06	0.00124583	0.034138	0.00696571	0.104554	0.00699218	0.0401292	0.00447962
10	0.0392424	0.0380119	0.0225791	0.0793223	0.0178409	0.287519	0.108577	0.00302433	0.0247523	1.73917	0.230534	0.613401	0.000877619	0.00825368	0.0574199	0.00581656	0.0101732	0.0220128	0.0210367	0.00895324	6.89798e-06	0.00430258	0.0106193
11	0.106628	0.14696	0.756969	0.245542	0.065066	0.00696689	0.0013224	0.0412891	0.0664209	0.230534	1.05075	0.111765	0.0133502	0.144082	0.0494322	0.00647427	0.0493189	0.0882217	0.00130053	0.000317226	0.0109232	0.0190595	0.0132296
12	0.00999722	0.00756358	0.347274	0.0134684	0.0924852	0.21473	0.00706791	0.251562	0.0397666	0.613401	0.111765	2.61894	0.0127088	0.0526104	0.00369462	0.0295119	0.000101021	0.0824254	0.000309941	0.0414275	0.0103891	0.000306847	2.10681e-05
13	0.600042	0.0403528	0.297369	1.05799	0.040411	0.309477	0.0585617	0.340451	0.0343445	0.000877619	0.0133502	0.0127088	3.88461	0.0789256	0.155909	0.131388	0.0343401	0.294571	0.131029	0.021055	0.00212662	0.00754309	0.00570327
14	0.0391639	0.0408781	0.0604995	0.0717795	0.068116	0.009339	0.00201674	0.186038	0.00140834	0.00825368	0.144082	0.0526104	0.0789256	0.329757	0.00937023	0.00977444	0.0691584	0.0020948	0.0384068	0.00680422	0.0215801	0.000265473	0.0146749
15	0.00618099	0.167805	0.121129	0.00988776	0.108794	0.0258885	0.0251408	0.00314988	0.134995	0.0574199	0.0494322	0.00369462	0.155909	0.00937023	0.657841	0.0274693	0.0176036	0.0153462	0.0170618	0.0546469	0.0102438	0.0285502	0.00691559
16	0.348516	0.0268815	0.0141248	0.0215684	0.0257971	0.0373675	0.0294004	0.00637497	6.02463e-06	0.00581656	0.00647427	0.0295119	0.131388	0.00977444	0.0274693	0.311936	0.0102693	0.000330141	0.000248775	0.0761256	0.0127523	0.00314763	0.000919909
17	0.0242254	0.102675	0.0850709	0.000510977	1.76383e-06	0.00143528	0.0549539	0.00459939	0.00124583	0.0101732	0.0493189	0.000101021	0.0343401	0.0691584	0.0176036	0.0102693	0.165946	0.0176225	0.0184653	0.0560679	0.0021726	2.36627e-05	0.0207533
18	0.189131	0.0993824	0.644305	0.0412531	0.0150716	0.00127115	0.0105682	0.193542	0.034138	0.0220128	0.0882217	0.0824254	0.294571	0.0020948	0.0153462	0.000330141	0.0176225	1.34491	0.0199734	0.0348712	0.052508	0.00829136	0.0150455
19	0.00424772	0.0062504	0.0185817	0.0670136	0.0154418	0.0394299	0.00529537	0.000655069	0.00696571	0.0210367	0.00130053	0.000309941	0.131029	0.0384068	0.0170618	0.000248775	0.0184653	0.0199734	0.0909574	0.13722	0.00488387	0.00739774	0.000866714
20	0.215289	0.000906129	0.055765	0.0636271	0.0119319	0.147696	0.0385232	0.000134012	0.104554	0.00895324	0.000317226	0.0414275	0.021055	0.00680422	0.0546469	0.0761256	0.0560679	0.0348712	0.13722	0.614089	0.0628909	0.0436193	0.000164609
21	0.0185712	0.00320083	4.05195e-05	0.00528855	0.00359822	0.00994957	0.004981	0.00150287	0.00699218	6.89798e-06	0.0109232	0.0103891	0.00212662	0.0215801	0.0102438	0.0127523	0.0021726	0.052508	0.00488387	0.0628909	0.0336683	0.00565389	0.00695389
22	0.02888	0.0319854	0.0303325	0.00678855	0.00300748	0.000400852	0.00302354	0.000117259	0.0401292	0.00430258	0.0190595	0.000306847	0.00754309	0.000265473	0.0285502	0.00314763	2.36627e-05	0.00829136	0.00739774	0.0436193	0.00565389	0.0145428	0.00205934
23	8.0656e-06	0.0128165	0.0144456	7.396e-05	0.00177325	0.017857	0.00188009	0.0113934	0.00447962	0.0106193	0.0132296	2.10681e-05	0.00570327	0.0146749	0.00691559	0.000919909	0.0207533	0.0150455	0.000866714	0.000164609	0.00695389	0.00205934	0.01
24-dimensional	118158	35621.3	1352.22	0.0201842	0.0351953	0.571179	0.0115606	0.123802	0.152457	0.0585598	0.0909698	0.0416829	0.482216	0.0737546	0.0264737	0.198088	0.0121005	0.53359	0.00378118	0.136745	0.0426489	0.000556619	0.0206175	0.0128845
2	35621.3	85720.8	18037.9	0.280565	0.0822846	0.154509	0.703146	0.0115576	0.325107	0.019222	0.123461	0.0919911	0.0922922	0.0880456	0.267845	0.122761	0.43731	0.482361	0.0583659	0.00823973	0.0215221	7.99566e-05	0.0906603	0.0212139
3	1352.22	18037.9	41012.2	0.992741	0.13673	0.0678112	0.249511	0.0989169	0.211415	0.0156696	0.732384	0.582351	0.249479	0.0829864	0.156889	0.0407534	0.196678	0.944021	0.043557	0.0840894	0.00114082	0.00819484	0.0415639	0.00420812
4	0.0201842	0.280565	0.992741	5.78453	0.021403	0.108725	0.0740243	0.175421	0.0301888	0.062115	0.264123	0.0117814	1.18333	0.0455863	0.0260923	0.00156661	0.0301228	0.000229789	0.0273357	0.0333727	0.000434916	0.00065928	0.0136254	0.00702579
5	0.0351953	0.0822846	0.13673	0.021403	0.539136	0.0972009	0.145147	0.0326494	0.0261953	0.0156251	0.0675723	0.132126	0.0469516	0.0608147	0.119893	0.0357125	0.00255358	0.0325698	0.00990755	0.00825237	0.00214115	0.000690092	0.000182888	0.000491066
6	0.571179	0.154509	0.0678112	0.108725	0.0972009	4.55806	0.14718	0.16905	0.0313678	0.260551	0.00473839	0.412068	0.364076	0.00285038	0.0124411	0.0776104	0.0375659	0.0437469	0.0744865	0.193256	0.00342422	0.0043408	0.0482166	0.00443956
7	0.0115606	0.703146	0.249511	0.0740243	0.145147	0.14718	2.05317	0.000919948	1.20217e-05	0.154347	1.46956e-07	0.126	0.0159312	0.00377572	0.00138223	0.145296	0.381777	0.280336	0.0653362	0.110392	0.000949514	0.070883	0.0282262	0.0268468
8	0.123802	0.0115576	0.0989169	0.175421	0.0326494	0.16905	0.000919948	2.98977	0.12559	0.00320254	0.0416585	0.240583	0.343865	0.183733	0.00281582	0.00724702	0.00600381	0.184196	0.000440397	0.000225116	0.00131125	3.02918e-05	0.0125592	1.70569e-05
9	0.152457	0.325107	0.211415	0.0301888	0.0261953	0.0313678	1.20217e-05	0.12559	0.790067	0.0132189	0.0546015	0.00884917	0.06902	0.0117991	0.201203	0.0203467	0.0488572	0.220882	0.00150263	0.0540329	0.0229209	0.0034935	0.0433571	0.0119968
10	0.0585598	0.019222	0.0156696	0.062115	0.0156251	0.260551	0.154347	0.00320254	0.0132189	1.77883	0.222451	0.461833	5.29191e-06	0.00432294	0.0445116	0.0158156	0.00010739	0.00227247	0.0103813	0.00390992	0.000453801	0.013329	0.00282659	0.00149537
11	0.0909698	0.123461	0.732384	0.264123	0.0675723	0.00473839	1.46956e-07	0.0416585	0.0546015	0.222451	1.06066	0.154571	0.0171768	0.133464	0.042463	0.00274118	0.0291336	0.057522	0.00013358	1.71192e-07	0.00826736	0.0276787	0.00751543	0.000482242
12	0.0416829	0.0919911	0.582351	0.0117814	0.132126	0.412068	0.126	0.240583	0.00884917	0.461833	0.154571	5.45824	0.00586759	0.00307395	0.0672265	0.264957	0.380729	0.96991	0.0791861	0.181399	0.00408071	0.107552	0.116326	0.0717972
13	0.482216	0.0922922	0.249479	1.18333	0.0469516	0.364076	0.0159312	0.343865	0.06902	5.29191e-06	0.0171768	0.00586759	4.08391	0.0552586	0.199986	0.20513	0.122974	0.128699	0.0801628	0.00747579	5.71609e-06	1.80707e-05	0.0277794	0.00499284
14	0.0737546	0.0880456	0.0829864	0.0455863	0.0608147	0.00285038	0.00377572	0.183733	0.0117991	0.00432294	0.133464	0.00307395	0.0552586	0.379921	0.0209917	0.000249244	0.172133	0.0151922	0.0720438	0.0185931	0.0349944	0.0045421	0.0419733	0.00421331
15	0.0264737	0.267845	0.156889	0.0260923	0.119893	0.0124411	0.00138223	0.00281582	0.201203	0.0445116	0.042463	0.0672265	0.199986	0.0209917	0.749874	0.0678883	0.0936654	0.100352	0.00229969	0.0296831	0.0216244	0.00539588	0.031942	0.00548785
16	0.198088	0.122761	0.0407534	0.00156661	0.0357125	0.0776104	0.145296	0.00724702	0.0203467	0.0158156	0.00274118	0.264957	0.20513	0.000249244	0.0678883	0.521756	0.160699	0.0992982	0.0251529	0.146021	0.00113744	0.0488946	0.0181649	0.0163814
17	0.0121005	0.43731	0.196678	0.0301228	0.00255358	0.0375659	0.381777	0.00600381	0.0488572	0.00010739	0.0291336	0.380729	0.122974	0.172133	0.0936654	0.160699	0.91215	0.227209	0.157642	0.185768	0.036645	0.0881321	0.198879	0.05477
18	0.53359	0.482361	0.944021	0.000229789	0.0325698	0.0437469	0.280336	0.184196	0.220882	0.00227247	0.057522	0.96991	0.128699	0.0151922	0.100352	0.0992982	0.227209	3.37745	0.186544	0.162283	0.00462546	0.0598668	0.0454781	0.0678082
19	0.00378118	0.0583659	0.043557	0.0273357	0.00990755	0.0744865	0.0653362	0.000440397	0.00150263	0.0103813	0.00013358	0.0791861	0.0801628	0.0720438	0.00229969	0.0251529	0.157642	0.186544	0.181574	0.214406	6.93534e-07	0.0528462	0.0300645	0.0124523
20	0.136745	0.00823973	0.0840894	0.0333727	0.00825237	0.193256	0.110392	0.000225116	0.0540329	0.00390992	1.71192e-07	0.181399	0.00747579	0.0185931	0.0296831	0.146021	0.185768	0.162283	0.214406	0.726777	0.0397709	0.099762	0.00887875	0.00688734
21	0.0426489	0.0215221	0.00114082	0.000434916	0.00214115	0.00342422	0.000949514	0.00131125	0.0229209	0.000453801	0.00826736	0.00408071	5.71609e-06	0.0349944	0.0216244	0.00113744	0.036645	0.00462546	6.93534e-07	0.0397709	0.0491866	2.10635e-05	0.0266392	0.00382913
22	0.000556619	7.99566e-05	0.00819484	0.00065928	0.000690092	0.0043408	0.070883	3.02918e-05	0.0034935	0.013329	0.0276787	0.107552	1.80707e-05	0.0045421	0.00539588	0.0488946	0.0881321	0.0598668	0.0528462	0.099762	2.10635e-05	0.0822674	0.0146264	0.0166229
23	0.0206175	0.0906603	0.0415639	0.0136254	0.000182888	0.0482166	0.0282262	0.0125592	0.0433571	0.00282659	0.00751543	0.116326	0.0277794	0.0419733	0.031942	0.0181649	0.198879	0.0454781	0.0300645	0.00887875	0.0266392	0.0146264	0.0709743	0.016641
24	0.0128845	0.0212139	0.00420812	0.00702579	0.000491066	0.00443956	0.0268468	1.70569e-05	0.0119968	0.00149537	0.000482242	0.0717972	0.00499284	0.00421331	0.00548785	0.0163814	0.05477	0.0678082	0.0124523	0.00688734	0.00382913	0.0166229	0.016641	0.01
25-dimensional	118247	35653.5	1355.78	0.0762022	0.0840534	0.463667	0.0295136	0.192585	0.134792	0.0200746	0.0502465	0.0364793	0.236301	0.115976	0.0178492	0.161505	0.0141181	0.544022	0.021113	0.100477	0.000828103	0.00247597	0.00643177	0.0432987	0.0128868
2	35653.5	85753.8	18046.5	0.382243	0.0480532	0.118063	0.633687	0.0272307	0.342924	0.00523153	0.162068	0.0973478	0.0275824	0.0630634	0.288133	0.103566	0.660274	0.475857	0.0346633	0.00312031	0.0913612	0.000688583	0.117653	0.00690991	0.0056325
3	1355.78	18046.5	41019.6	0.895059	0.166606	0.083229	0.274196	0.120522	0.203444	0.0265131	0.683468	0.574831	0.177484	0.0985731	0.148353	0.0475623	0.127874	0.949212	0.0576778	0.0959785	0.00297479	0.0100695	0.0324284	0.0100738	0.00181561
4	0.0762022	0.382243	0.895059	6.47393	0.0638416	0.0634721	0.042128	0.107843	0.0223526	0.12497	0.353375	0.0089969	1.7014	0.0201074	0.017232	2.83679e-05	0.00413883	0.00050836	0.0061154	0.0163275	0.0704768	2.33223e-06	0.00258322	0.0331759	0.0139287
5	0.0840534	0.0480532	0.166606	0.0638416	0.665028	0.063684	0.186635	0.0124601	0.0205455	0.0418773	0.103325	0.124635	0.145979	0.0368039	0.104424	0.0498503	0.0171982	0.0346381	0.00108858	0.00239259	0.0543286	0.00221319	0.0040771	0.00945704	0.00812342
6	0.463667	0.118063	0.083229	0.0634721	0.063684	4.74549	0.119936	0.130063	0.026755	0.323407	0.00056924	0.402309	0.524683	0.000177849	0.0164972	0.0922149	0.00371421	0.0454902	0.103421	0.221158	0.0380832	0.0025695	0.033406	0.0147739	0.00434545
7	0.0295136	0.633687	0.274196	0.042128	0.186635	0.119936	2.14607	0.000170492	6.66266e-05	0.11754	0.00146295	0.121381	0.000498231	0.00918707	0.00267244	0.162184	0.253766	0.284102	0.0884539	0.128588	0.00748953	0.064104	0.0186022	0.0445295	0.00320582
8	0.192585	0.0272307	0.120522	0.107843	0.0124601	0.130063	0.000170492	3.19629	0.136994	0.0154508	0.0230492	0.231942	0.198724	0.225816	0.00111665	0.00313283	0.0537996	0.188336	0.0060158	0.000426192	0.0150356	0.000147851	0.023981	0.00356534	0.00587216
9	0.134792	0.342924	0.203444	0.0223526	0.0205455	0.026755	6.66266e-05	0.136994	0.797585	0.00937492	0.0613474	0.00930312	0.0506365	0.0092436	0.205956	0.0181782	0.0688743	0.219675	0.000556915	0.0585664	0.0376242	0.00295624	0.0482651	0.00854111	0.000421892
10	0.0200746	0.00523153	0.0265131	0.12497	0.0418773	0.323407	0.11754	0.0154508	0.00937492	1.99319	0.282955	0.448007	0.0270408	0.0142651	0.0354652	0.00848961	0.0281382	0.00283042	0.0279307	0.0107401	0.0417983	0.0184466	1.46343e-05	0.00122099	0.00780749
11	0.0502465	0.162068	0.683468	0.353375	0.103325	0.00056924	0.00146295	0.0230492	0.0613474	0.282955	1.15872	0.14841	0.0656703	0.104892	0.049979	0.000696683	0.0949976	0.0554915	0.00150672	0.0010339	0.0539844	0.022693	0.0155729	0.00620982	0.00465533
12	0.0364793	0.0973478	0.574831	0.0089969	0.124635	0.402309	0.121381	0.231942	0.00930312	0.448007	0.14841	5.46453	0.00305966	0.00390517	0.0687777	0.260432	0.410131	0.96848	0.0744395	0.176831	0.00773059	0.109313	0.120786	0.0667117	0.00013456
13	0.236301	0.0275824	0.177484	1.7014	0.145979	0.524683	0.000498231	0.198724	0.0506365	0.0270408	0.0656703	0.00305966	5.55824	0.0152713	0.160119	0.273251	0.000368816	0.120589	0.0218012	1.20655e-06	0.146483	0.00144748	0.00412228	0.0499674	0.0336723
14	0.115976	0.0630634	0.0985731	0.0201074	0.0368039	0.000177849	0.00918707	0.225816	0.0092436	0.0142651	0.104892	0.00390517	0.0152713	0.426795	0.0167201	5.37541e-05	0.0855064	0.0161443	0.0981373	0.0271004	0.00373697	0.00285049	0.0292224	0.013347	0.00369178
15	0.0178492	0.288133	0.148353	0.017232	0.104424	0.0164972	0.00267244	0.00111665	0.205956	0.0354652	0.049979	0.0687777	0.160119	0.0167201	0.761303	0.0628995	0.127971	0.099338	0.00447361	0.0339354	0.0400785	0.00456255	0.0372647	0.00277933	0.00065741
16	0.161505	0.103566	0.0475623	2.83679e-05	0.0498503	0.0922149	0.162184	0.00313283	0.0181782	0.00848961	0.000696683	0.260432	0.273251	5.37541e-05	0.0628995	0.542882	0.10509	0.100805	0.0348528	0.159863	0.012677	0.0450928	0.0128891	0.0255007	0.0014478
17	0.0141181	0.660274	0.127874	0.00413883	0.0171982	0.00371421	0.253766	0.0537996	0.0688743	0.0281382	0.0949976	0.410131	0.000368816	0.0855064	0.127971	0.10509	1.85333	0.215339	0.0616141	0.113729	0.371153	0.117877	0.311939	0.00436948	0.0406305
18	0.544022	0.475857	0.949212	0.00050836	0.0346381	0.0454902	0.284102	0.188336	0.219675	0.00283042	0.0554915	0.96848	0.120589	0.0161443	0.099338	0.100805	0.215339	3.37889	0.190558	0.164638	0.00655871	0.0591627	0.0439994	0.0705514	3.91876e-05
19	0.021113	0.0346633	0.0576778	0.0061154	0.00108858	0.103421	0.0884539	0.0060158	0.000556915	0.0279307	0.00150672	0.0744395	0.0218012	0.0981373	0.00447361	0.0348528	0.0616141	0.190558	0.230999	0.247393	0.023673	0.0453116	0.0174674	0.0299628	0.00545087
20	0.100477	0.00312031	0.0959785	0.0163275	0.00239259	0.221158	0.128588	0.000426192	0.0585664	0.0107401	0.0010339	0.176831	1.20655e-06	0.0271004	0.0339354	0.159863	0.113729	0.164638	0.247393	0.764144	0.0875263	0.0931033	0.00465811	0.014822	0.00216411
21	0.000828103	0.0913612	0.00297479	0.0704768	0.0543286	0.0380832	0.00748953	0.0150356	0.0376242	0.0417983	0.0539844	0.00773059	0.146483	0.00373697	0.0400785	0.012677	0.371153	0.00655871	0.023673	0.0875263	0.424308	0.00274212	0.0778158	0.0122759	0.0429609
22	0.00247597	0.000688583	0.0100695	2.33223e-06	0.00221319	0.0025695	0.064104	0.000147851	0.00295624	0.0184466	0.022693	0.109313	0.00144748	0.00285049	0.00456255	0.0450928	0.117877	0.0591627	0.0453116	0.0931033	0.00274212	0.0853434	0.0179053	0.01204	0.000531303
23	0.00643177	0.117653	0.0324284	0.00258322	0.0040771	0.033406	0.0186022	0.023981	0.0482651	1.46343e-05	0.0155729	0.120786	0.00412228	0.0292224	0.0372647	0.0128891	0.311939	0.0439994	0.0174674	0.00465811	0.0778158	0.0179053	0.0885604	0.0068029	0.00311811
24	0.0432987	0.00690991	0.0100738	0.0331759	0.00945704	0.0147739	0.0445295	0.00356534	0.00854111	0.00122099	0.00620982	0.0667117	0.0499674	0.013347	0.00277933	0.0255007	0.00436948	0.0705514	0.0299628	0.014822	0.0122759	0.01204	0.0068029	0.0286982	0.00694056
25	0.0128868	0.0056325	0.00181561	0.0139287	0.00812342	0.00434545	0.00320582	0.00587216	0.000421892	0.00780749	0.00465533	0.00013456	0.0336723	0.00369178	0.00065741	0.0014478	0.0406305	3.91876e-05	0.00545087	0.00216411	0.0429609	0.000531303	0.00311811	0.00694056	0.01
26-dimensional	118322	35674.7	1359.81	0.0158612	0.120002	0.441274	0.122116	0.143965	0.110825	0.000934624	0.0106403	0.0644034	0.218038	0.129335	0.0401764	0.120786	0.0467817	0.349089	0.00540351	0.0611522	0.0283409	0.0057196	0.0283276	0.0232571	0.00393767	0.0109893
2	35674.7	85770.7	18054	0.2932	0.0362196	0.112284	0.497272	0.018124	0.363741	0.000248979	0.215732	0.0783401	0.0244228	0.0582573	0.252599	0.086451	0.743783	0.585044	0.0888647	0.00040857	0.139614	0.00143596	0.0887675	0.0124446	0.00240903	0.0028751
3	1359.81	18054	41030.6	1.04202	0.190353	0.0880787	0.374625	0.100861	0.188361	0.0617873	0.587507	0.623195	0.169538	0.104627	0.175089	0.06009	0.0955295	0.812222	0.0172257	0.118676	0.0153795	0.00143902	0.0501474	0.00528566	0.000300649	0.00272275
4	0.0158612	0.2932	1.04202	7.55934	0.0308016	0.0754465	0.200628	0.0611249	0.0385234	0.0139763	0.184187	8.27277e-05	1.6338	0.0281773	0.00159782	0.00474573	0.00473403	0.049722	0.0486994	0.0497164	0.00559976	0.0298587	0.00483383	0.0665959	0.0351064	0.0205034
5	0.120002	0.0362196	0.190353	0.0308016	0.713238	0.059438	0.273885	0.0202122	0.0158097	0.0859612	0.147186	0.148465	0.153603	0.0331369	0.127811	0.063103	0.0328512	0.0122496	0.0211639	0.000171296	0.0929239	0.000303222	0.000344386	0.00471623	0.00409998	0.00290413
6	0.441274	0.112284	0.0880787	0.0754465	0.059438	4.75649	0.10202	0.136636	0.0250852	0.353767	3.05639e-05	0.414464	0.528897	0.000109115	0.0139987	0.0972814	0.00213251	0.0365022	0.0832003	0.231199	0.0467822	0.0048559	0.0384631	0.012798	0.00339065	0.000252174
7	0.122116	0.497272	0.374625	0.200628	0.273885	0.10202	3.07003	0.00688872	0.0040337	0.00414325	0.0546941	0.202404	7.49613e-05	0.016051	0.00317627	0.240647	0.11984	0.0874903	0.00317225	0.222082	0.0974529	0.207836	0.0777458	0.0146815	0.000647922	0.0287201
8	0.143965	0.018124	0.100861	0.0611249	0.0202122	0.136636	0.00688872	3.3122	0.123633	0.000971235	0.0471955	0.200398	0.208069	0.216118	7.41378e-06	0.00728444	0.0321292	0.263495	0.038365	0.00029024	0.00222369	0.0063927	0.0410052	0.00805725	0.0108327	0.00321262
9	0.110825	0.363741	0.188361	0.0385234	0.0158097	0.0250852	0.0040337	0.123633	0.816752	0.00186255	0.0814438	0.00591247	0.0479853	0.00813595	0.187489	0.0139001	0.0857356	0.26462	0.00842178	0.0695468	0.056384	0.00873028	0.0369572	0.0120417	2.23045e-05	0.00106668
10	0.000934624	0.000248979	0.0617873	0.0139763	0.0859612	0.353767	0.00414325	0.000971235	0.00186255	2.8285	0.520721	0.589432	0.037822	0.0223033	0.0859033	4.86094e-05	0.102739	0.031263	0.0309269	0.0453155	0.179117	0.00368751	0.020146	0.00272273	7.70853e-05	0.0270011
11	0.0106403	0.215732	0.587507	0.184187	0.147186	3.05639e-05	0.0546941	0.0471955	0.0814438	0.520721	1.46332	0.206453	0.0769301	0.0917255	0.0224885	0.00111774	0.172677	0.157724	0.0408527	0.0118575	0.149018	0.0833523	0.000771302	0.00030981	0.000151961	0.0133241
12	0.0644034	0.0783401	0.623195	8.27277e-05	0.148465	0.414464	0.202404	0.200398	0.00591247	0.589432	0.206453	5.63351	0.00439067	0.00266167	0.0902647	0.293078	0.341908	0.810504	0.021853	0.211902	6.70144e-05	0.161812	0.158309	0.0513169	0.00164874	0.00358681
13	0.218038	0.0244228	0.169538	1.6338	0.153603	0.528897	7.49613e-05	0.208069	0.0479853	0.037822	0.0769301	0.00439067	5.57401	0.0144601	0.169582	0.283246	0.00131054	0.139015	0.0345247	0.000122193	0.165705	0.000261827	0.00633128	0.0457283	0.0305016	0.000334158
14	0.129335	0.0582573	0.104627	0.0281773	0.0331369	0.000109115	0.016051	0.216118	0.00813595	0.0223033	0.0917255	0.00266167	0.0144601	0.431134	0.0198558	0.000281058	0.0758961	0.0103193	0.075779	0.0312305	0.00136155	0.00564887	0.0346863	0.0112105	0.00269836	0.00033124
15	0.0401764	0.252599	0.175089	0.00159782	0.127811	0.0139987	0.00317627	7.41378e-06	0.187489	0.0859033	0.0224885	0.0902647	0.169582	0.0198558	0.833898	0.0805677	0.0890703	0.0510435	0.0399885	0.0201152	0.0132955	7.59807e-05	0.0608268	0.00035773	0.00319439	0.00406534
16	0.120786	0.086451	0.06009	0.00474573	0.063103	0.0972814	0.240647	0.00728444	0.0139001	4.86094e-05	0.00111774	0.293078	0.283246	0.000281058	0.0805677	0.58319	0.076167	0.0599988	0.00616291	0.188603	0.0329781	0.075265	0.0246782	0.0174793	0.00016767	0.00268635
17	0.0467817	0.743783	0.0955295	0.00473403	0.0328512	0.00213251	0.11984	0.0321292	0.0857356	0.102739	0.172677	0.341908	0.00131054	0.0758961	0.0890703	0.076167	2.09619	0.353073	0.195629	0.0758588	0.537313	0.0538792	0.230751	0.0133172	0.0245047	0.00864528
18	0.349089	0.585044	0.812222	0.049722	0.0122496	0.0365022	0.0874903	0.263495	0.26462	0.031263	0.157724	0.810504	0.139015	0.0103193	0.0510435	0.0599988	0.353073	4.13764	0.531018	0.0977798	0.0111057	0.00574622	0.00848374	0.115486	0.00548375	0.0195944
19	0.00540351	0.0888647	0.0172257	0.0486994	0.0211639	0.0832003	0.00317225	0.038365	0.00842178	0.0309269	0.0408527	0.021853	0.0345247	0.075779	0.0399885	0.00616291	0.195629	0.531018	0.839616	0.12861	0.0153866	0.00135399	0.00187256	0.0805234	0.0305963	0.0435682
20	0.0611522	0.00040857	0.118676	0.0497164	0.000171296	0.231199	0.222082	0.00029024	0.0695468	0.0453155	0.0118575	0.211902	0.000122193	0.0312305	0.0201152	0.188603	0.0758588	0.0977798	0.12861	0.843365	0.147733	0.147952	0.0154075	0.00748192	0.000205169	0.00441959
21	0.0283409	0.139614	0.0153795	0.00559976	0.0929239	0.0467822	0.0974529	0.00222369	0.056384	0.179117	0.149018	6.70144e-05	0.165705	0.00136155	0.0132955	0.0329781	0.537313	0.0111057	0.0153866	0.147733	0.686663	0.0114241	0.0279059	0.00161651	0.0203891	0.0177263
22	0.0057196	0.00143596	0.00143902	0.0298587	0.000303222	0.0048559	0.207836	0.0063927	0.00873028	0.00368751	0.0833523	0.161812	0.000261827	0.00564887	7.59807e-05	0.075265	0.0538792	0.00574622	0.00135399	0.147952	0.0114241	0.1894	0.0549167	0.0021446	0.00655729	0.0143066
23	0.0283276	0.0887675	0.0501474	0.00483383	0.000344386	0.0384631	0.0777458	0.0410052	0.0369572	0.020146	0.000771302	0.158309	0.00633128	0.0346863	0.0608268	0.0246782	0.230751	0.00848374	0.00187256	0.0154075	0.0279059	0.0549167	0.135597	0.00143765	0.00932102	0.0070644
24	0.0232571	0.0124446	0.00528566	0.0665959	0.00471623	0.012798	0.0146815	0.00805725	0.0120417	0.00272273	0.00030981	0.0513169	0.0457283	0.0112105	0.00035773	0.0174793	0.0133172	0.115486	0.0805234	0.00748192	0.00161651	0.0021446	0.00143765	0.0390129	0.0118783	0.00281112
25	0.00393767	0.00240903	0.000300649	0.0351064	0.00409998	0.00339065	0.000647922	0.0108327	2.23045e-05	7.70853e-05	0.000151961	0.00164874	0.0305016	0.00269836	0.00319439	0.00016767	0.0245047	0.00548375	0.0305963	0.000205169	0.0203891	0.00655729	0.00932102	0.0118783	0.0152411	0.00234546
26	0.0109893	0.0028751	0.00272275	0.0205034	0.00290413	0.000252174	0.0287201	0.00321262	0.00106668	0.0270011	0.0133241	0.00358681	0.000334158	0.00033124	0.00406534	0.00268635	0.00864528	0.0195944	0.0435682	0.00441959	0.0177263	0.0143066	0.0070644	0.00281112	0.00234546	0.01
27-dimensional	118342	35672.8	1362.71	0.0289885	0.0823366	0.432227	0.181022	0.159429	0.162679	0.000121113	0.0160552	0.0656392	0.261918	0.0892448	0.0635855	0.0949338	0.0773237	0.340173	0.00261387	0.0711922	0.0160398	0.0114687	0.00734298	0.0141706	0.000561859	0.0342632	0.00282386
2	35672.8	85771.2	18052.1	0.28454	0.0322217	0.11312	0.516952	0.017165	0.379348	0.000544617	0.219728	0.0785869	0.0219418	0.0530363	0.262138	0.0907174	0.724538	0.582934	0.0913071	0.000277658	0.145336	0.00103519	0.080044	0.0111244	0.00315619	0.00152315	9.33156e-05
3	1362.71	18052.1	41052.8	0.919939	0.125004	0.0938213	0.51527	0.119173	0.283016	0.0363771	0.638821	0.628529	0.224795	0.0569986	0.240485	0.0899933	0.0497858	0.793291	0.0263692	0.100694	0.00435617	3.40999e-05	0.0118804	0.000683762	0.00136786	0.0268497	0.00546564
4	0.0289885	0.28454	0.919939	7.94666	0.00675207	0.0696608	0.107986	0.0466853	0.0941337	0.00280576	0.15382	0.000166372	1.45887	0.0693949	0.0146764	4.909e-05	0.000792791	0.044549	0.0654375	0.0643238	8.81259e-05	0.0152314	0.0396758	0.0422487	0.0158973	0.000296045	0.00695556
5	0.0823366	0.0322217	0.125004	0.00675207	0.940459	0.066674	0.131953	0.0338525	0.000510263	0.14497	0.187712	0.144558	0.236528	0.0028942	0.0617945	0.0282798	0.00261555	0.0160453	0.0371005	0.00078618	0.154174	0.00238619	0.0241581	0.0193612	0.0213927	0.0132621	0.0125238
6	0.432227	0.11312	0.0938213	0.0696608	0.066674	4.76373	0.0905892	0.1331	0.0307842	0.341881	0.000126296	0.415221	0.513209	0.000635293	0.0111894	0.103334	0.000973742	0.0358023	0.0863593	0.22667	0.0425122	0.00597692	0.0310097	0.0110287	0.00237803	0.00124867	0.000165894
7	0.181022	0.516952	0.51527	0.107986	0.131953	0.0905892	3.829	0.000872644	0.0158979	0.0310783	0.0290544	0.208316	0.0125515	0.00138594	0.038255	0.356051	0.0323527	0.0758153	1.54445e-05	0.175297	0.0399692	0.292238	0.0031843	0.000966498	0.0170479	0.148658	0.0204633
8	0.159429	0.017165	0.119173	0.0466853	0.0338525	0.1331	0.000872644	3.36322	0.0912551	3.71086e-06	0.0546677	0.201927	0.237826	0.178137	0.00113228	0.00332011	0.049592	0.258041	0.0447788	0.000946788	0.000317973	0.00334403	0.0679106	0.00438645	0.00587072	5.23851e-08	0.00139652
9	0.162679	0.379348	0.283016	0.0941337	0.000510263	0.0307842	0.0158979	0.0912551	1.16513	0.00366534	0.118431	0.00687845	0.0114986	0.00380419	0.315845	0.0467612	0.019242	0.245493	0.0217846	0.0976098	0.116593	0.000223772	0.000190921	0.000690324	0.0104271	0.0280747	0.0175669
10	0.000121113	0.000544617	0.0363771	0.00280576	0.14497	0.341881	0.0310783	3.71086e-06	0.00366534	3.03815	0.57198	0.583966	0.0678549	0.0571201	0.0470637	0.0042284	0.0527011	0.0274343	0.0436037	0.0583839	0.234854	0.00020733	0.0694724	8.47986e-06	0.00439179	0.00212804	0.0061215
11	0.0160552	0.219728	0.638821	0.15382	0.187712	0.000126296	0.0290544	0.0546677	0.118431	0.57198	1.51125	0.20462	0.0990764	0.0635364	0.0372907	2.91339e-07	0.1325	0.152733	0.0487493	0.0156709	0.177085	0.0688853	0.00169312	0.00207171	0.00201609	0.00234887	0.00196515
12	0.0656392	0.0785869	0.628529	0.000166372	0.144558	0.415221	0.208316	0.201927	0.00687845	0.583966	0.20462	5.63449	0.00389561	0.00322814	0.0929513	0.296753	0.335736	0.809331	0.0224245	0.210361	0.000138403	0.163992	0.152718	0.0500242	0.00193208	0.00445935	2.07936e-05
13	0.261918	0.0219418	0.224795	1.45887	0.236528	0.513209	0.0125515	0.237826	0.0114986	0.0678549	0.0990764	0.00389561	5.91519	0.000555564	0.108693	0.22053	0.00383003	0.13017	0.0489936	0.00176905	0.223989	0.00437404	0.0444111	0.0712728	0.0559995	0.0119179	0.0071183
14	0.0892448	0.0530363	0.0569986	0.0693949	0.0028942	0.000635293	0.00138594	0.178137	0.00380419	0.0571201	0.0635364	0.00322814	0.000555564	0.620812	0.0008632	0.00465956	0.167048	0.0139143	0.0515356	0.047888	0.00281107	5.34395e-05	0.132784	0.0316971	0.0185359	0.0239939	0.0131309
15	0.0635855	0.262138	0.240485	0.0146764	0.0617945	0.0111894	0.038255	0.00113228	0.315845	0.0470637	0.0372907	0.0929513	0.108693	0.0008632	1.01589	0.126781	0.0343326	0.0449523	0.0252733	0.0315406	0.0367416	0.00440176	0.00908436	0.00179564	0.0163935	0.044431	0.00947313
16	0.0949338	0.0907174	0.0899933	4.909e-05	0.0282798	0.103334	0.356051	0.00332011	0.0467612	0.0042284	2.91339e-07	0.296753	0.22053	0.00465956	0.126781	0.67031	0.0359932	0.0549168	0.0120467	0.165662	0.0152211	0.101301	0.00174176	0.00730776	0.00172835	0.0268686	0.00550564
17	0.0773237	0.724538	0.0497858	0.000792791	0.00261555	0.000973742	0.0323527	0.049592	0.019242	0.0527011	0.1325	0.335736	0.00383003	0.167048	0.0343326	0.0359932	2.50585	0.373093	0.154709	0.10122	0.411891	0.0266608	0.437073	0.0355733	0.00505691	0.0721472	0.0135164
18	0.340173	0.582934	0.793291	0.044549	0.0160453	0.0358023	0.0758153	0.258041	0.245493	0.0274343	0.152733	0.809331	0.13017	0.0139143	0.0449523	0.0549168	0.373093	4.14595	0.522282	0.101092	0.00886802	0.00453504	0.01307	0.121683	0.00714914	0.0261037	0.000204204
19	0.00261387	0.0913071	0.0263692	0.0654375	0.0371005	0.0863593	1.54445e-05	0.0447788	0.0217846	0.0436037	0.0487493	0.0224245	0.0489936	0.0515356	0.0252733	0.0120467	0.154709	0.522282	0.872443	0.117747	0.0246787	0.000140598	0.0118281	0.0661742	0.0207268	0.021055	0.00177409
20	0.0711922	0.000277658	0.100694	0.0643238	0.00078618	0.22667	0.175297	0.000946788	0.0976098	0.0583839	0.0156709	0.210361	0.00176905	0.047888	0.0315406	0.165662	0.10122	0.101092	0.117747	0.868353	0.170732	0.131686	0.0328559	0.0120208	0.00170797	0.000120241	0.00135056
21	0.0160398	0.145336	0.00435617	8.81259e-05	0.154174	0.0425122	0.0399692	0.000317973	0.116593	0.234854	0.177085	0.000138403	0.223989	0.00281107	0.0367416	0.0152211	0.411891	0.00886802	0.0246787	0.170732	0.792504	0.00365075	0.0020298	0.00803145	0.0401802	0.000213254	0.00615754
22	0.0114687	0.00103519	3.40999e-05	0.0152314	0.00238619	0.00597692	0.292238	0.00334403	0.000223772	0.00020733	0.0688853	0.163992	0.00437404	5.34395e-05	0.00440176	0.101301	0.0266608	0.00453504	0.000140598	0.131686	0.00365075	0.221144	0.0202462	8.14558e-05	0.0154964	0.043703	0.00350582
23	0.00734298	0.080044	0.0118804	0.0396758	0.0241581	0.0310097	0.0031843	0.0679106	0.000190921	0.0694724	0.00169312	0.152718	0.0444111	0.132784	0.00908436	0.00174176	0.437073	0.01307	0.0118281	0.0328559	0.0020298	0.0202462	0.372032	0.0184459	0.000313076	0.0227415	0.0241709
24	0.0141706	0.0111244	0.000683762	0.0422487	0.0193612	0.0110287	0.000966498	0.00438645	0.000690324	8.47986e-06	0.00207171	0.0500242	0.0712728	0.0316971	0.00179564	0.00730776	0.0355733	0.121683	0.0661742	0.0120208	0.00803145	8.14558e-05	0.0184459	0.0562491	0.024105	0.0219462	0.00396522
25	0.000561859	0.00315619	0.00136786	0.0158973	0.0213927	0.00237803	0.0170479	0.00587072	0.0104271	0.00439179	0.00201609	0.00193208	0.0559995	0.0185359	0.0163935	0.00172835	0.00505691	0.00714914	0.0207268	0.00170797	0.0401802	0.0154964	0.000313076	0.024105	0.0314877	0.0254176	0.00539931
26	0.0342632	0.00152315	0.0268497	0.000296045	0.0132621	0.00124867	0.148658	5.23851e-08	0.0280747	0.00212804	0.00234887	0.00445935	0.0119179	0.0239939	0.044431	0.0268686	0.0721472	0.0261037	0.021055	0.000120241	0.000213254	0.043703	0.0227415	0.0219462	0.0254176	0.107709	0.0228191
27	0.00282386	9.33156e-05	0.00546564	0.00695556	0.0125238	0.000165894	0.0204633	0.00139652	0.0175669	0.0061215	0.00196515	2.07936e-05	0.0071183	0.0131309	0.00947313	0.00550564	0.0135164	0.000204204	0.00177409	0.00135056	0.00615754	0.00350582	0.0241709	0.00396522	0.00539931	0.0228191	0.01
28-dimensional	118346	35680.6	1362.13	0.0289454	0.0672085	0.510293	0.200619	0.154676	0.195791	0.000744327	0.0154299	0.0706019	0.262219	0.0911649	0.0652726	0.0902565	0.0914088	0.332622	0.00206802	0.0647386	0.0124621	0.00330159	0.000256535	0.0113579	0.000229844	0.0355859	9.40947e-05	0.000642623
2	35680.6	85809.9	18045.2	0.284107	0.0719964	0.269175	0.418666	0.0124953	0.240469	0.000832857	0.227284	0.0624209	0.0222221	0.04842	0.251339	0.0764778	0.863072	0.615246	0.0806851	0.000530794	0.110944	0.0161248	0.256386	0.0211559	0.000828592	0.00253771	0.0221886	0.00660806
3	1362.13	18045.2	41056.8	0.919638	0.150424	0.141939	0.476167	0.124354	0.233803	0.0444691	0.643762	0.610004	0.22445	0.0551249	0.236467	0.0843754	0.0640938	0.807711	0.0241465	0.0912027	0.00715507	0.00452639	0.0381207	0.00172902	0.000697461	0.0254332	0.016308	0.000984704
4	0.0289454	0.284107	0.919638	7.94667	0.00684215	0.0690695	0.108277	0.0466342	0.0936604	0.00283987	0.153781	0.000161569	1.45889	0.0694281	0.0146605	5.12373e-05	0.000766066	0.0446032	0.0653805	0.0644477	9.37738e-05	0.0149907	0.0391302	0.0423498	0.0159398	0.000298452	0.00709921	2.5e-07
5	0.0672085	0.0719964	0.150424	0.00684215	1.18625	0.000167323	0.0710472	0.0250081	0.036603	0.203316	0.178521	0.115073	0.237762	0.00456645	0.0548782	0.0182353	0.00285713	0.0239407	0.0470755	0.000641288	0.209182	0.0272486	0.20769	0.0372022	0.0335194	0.0170078	0.00567279	0.0119377
6	0.510293	0.269175	0.141939	0.0690695	0.000167323	7.21757	0.249677	0.0971663	0.0293182	0.531223	0.00110926	0.313791	0.516947	0.00286366	0.018282	0.0642071	0.0605697	0.0609418	0.0594535	0.134291	0.115023	0.267123	0.629018	0.0464066	0.0154799	1.59818e-05	0.158059	0.0503958
7	0.200619	0.418666	0.476167	0.108277	0.0710472	0.249677	4.14172	0.00254843	0.0690497	0.0543462	0.0320962	0.239724	0.0127826	0.000679497	0.0429288	0.388798	0.00905124	0.0638151	0.00055974	0.213364	0.0217558	0.134907	0.0349092	0.00015477	0.0257267	0.158338	7.43171e-05	0.00783402
8	0.154676	0.0124953	0.124354	0.0466342	0.0250081	0.0971663	0.00254843	3.38379	0.114665	0.000293041	0.0557607	0.194029	0.237559	0.175627	0.000933154	0.00419828	0.0400172	0.264251	0.0425746	0.00179144	0.00101414	0.000132334	0.0382465	0.00606316	0.00715616	1.24737e-05	0.00607056	0.000559796
9	0.195791	0.240469	0.233803	0.0936604	0.036603	0.0293182	0.0690497	0.114665	1.73685	0.0255046	0.108213	0.0198424	0.0111176	0.00178122	0.339011	0.0692041	8.31813e-05	0.207767	0.0331308	0.05617	0.187425	0.10069	0.192079	0.00246757	0.0237641	0.0357639	0.0174481	0.0238486
10	0.000744327	0.000832857	0.0444691	0.00283987	0.203316	0.531223	0.0543462	0.000293041	0.0255046	3.18358	0.562473	0.547736	0.0682435	0.0533153	0.0434821	0.00713934	0.0282573	0.0222439	0.0497858	0.0442124	0.273161	0.0196324	0.19365	0.000821766	0.00772805	0.00138138	0.00101062	0.00412292
11	0.0154299	0.227284	0.643762	0.153781	0.178521	0.00110926	0.0320962	0.0557607	0.108213	0.562473	1.51363	0.20797	0.0990046	0.0629131	0.0367946	1.23919e-05	0.139439	0.154712	0.0477865	0.016896	0.172219	0.059153	0.000199651	0.001655	0.00172958	0.00248376	0.00374234	9.66289e-05
12	0.0706019	0.0624209	0.610004	0.000161569	0.115073	0.313791	0.239724	0.194029	0.0198424	0.547736	0.20797	5.70149	0.00384149	0.00271302	0.095974	0.309273	0.295413	0.792092	0.0249985	0.227502	0.00115475	0.109904	0.0827683	0.0421126	0.00320314	0.00518612	0.00356614	0.001407
13	0.262219	0.0222221	0.22445	1.45889	0.237762	0.516947	0.0127826	0.237559	0.0111176	0.0682435	0.0990046	0.00384149	5.91526	0.000562481	0.108593	0.2202	0.00396871	0.129955	0.0491081	0.00172171	0.224639	0.00407879	0.045765	0.0715777	0.0561846	0.0119533	0.00678683	1.3456e-06
14	0.0911649	0.04842	0.0551249	0.0694281	0.00456645	0.00286366	0.000679497	0.175627	0.00178122	0.0533153	0.0629131	0.00271302	0.000562481	0.623321	0.000963074	0.00415221	0.157326	0.0131608	0.0528197	0.0506214	0.00207486	0.000302026	0.108727	0.0295274	0.0173968	0.0234516	0.01855	0.000159012
15	0.0652726	0.251339	0.236467	0.0146605	0.0548782	0.018282	0.0429288	0.000933154	0.339011	0.0434821	0.0367946	0.095974	0.108593	0.000963074	1.01935	0.129628	0.0298393	0.043536	0.0243528	0.0293073	0.0397787	0.00165468	0.00351401	0.00238363	0.0175444	0.0452059	0.00560472	0.000171872
16	0.0902565	0.0764778	0.0843754	5.12373e-05	0.0182353	0.0642071	0.388798	0.00419828	0.0692041	0.00713934	1.23919e-05	0.309273	0.2202	0.00415221	0.129628	0.685448	0.0258224	0.0513281	0.0135759	0.177936	0.0111124	0.0670369	0.00173057	0.0049807	0.00268234	0.0282742	0.00049478	0.000919302
17	0.0914088	0.863072	0.0640938	0.000766066	0.00285713	0.0605697	0.00905124	0.0400172	8.31813e-05	0.0282573	0.139439	0.295413	0.00396871	0.157326	0.0298393	0.0258224	2.80438	0.403729	0.138378	0.0736556	0.342326	0.122998	0.854199	0.0555493	0.00150939	0.079505	0.00228321	0.00916423
18	0.332622	0.615246	0.807711	0.0446032	0.0239407	0.0609418	0.0638151	0.264251	0.207767	0.0222439	0.154712	0.792092	0.129955	0.0131608	0.043536	0.0513281	0.403729	4.17285	0.514041	0.0932735	0.00623467	0.0138348	0.03419	0.130654	0.0086875	0.027275	0.000882996	0.000659462
19	0.00206802	0.0806851	0.0241465	0.0653805	0.0470755	0.0594535	0.00055974	0.0425746	0.0331308	0.0497858	0.0477865	0.0249985	0.0491081	0.0528197	0.0243528	0.0135759	0.138378	0.514041	0.881749	0.125337	0.029001	0.00308014	0.0289072	0.0606544	0.0186204	0.0201617	1.53966e-05	0.000496844
20	0.0647386	0.000530794	0.0912027	0.0644477	0.000641288	0.134291	0.213364	0.00179144	0.05617	0.0442124	0.016896	0.227502	0.00172171	0.0506214	0.0293073	0.177936	0.0736556	0.0932735	0.125337	0.913378	0.147663	0.0714288	0.00221137	0.0073308	0.000618445	0.000316253	0.0145063	0.00238535
21	0.0124621	0.110944	0.00715507	9.37738e-05	0.209182	0.115023	0.0217558	0.00101414	0.187425	0.273161	0.172219	0.00115475	0.224639	0.00207486	0.0397787	0.0111124	0.342326	0.00623467	0.029001	0.147663	0.856197	0.0311127	0.0138628	0.014101	0.0485808	4.01286e-05	0.000530221	0.00350819
22	0.00330159	0.0161248	0.00452639	0.0149907	0.0272486	0.267123	0.134907	0.000132334	0.10069	0.0196324	0.059153	0.109904	0.00407879	0.000302026	0.00165468	0.0670369	0.122998	0.0138348	0.00308014	0.0714288	0.0311127	0.728628	0.462969	0.0110912	0.00342265	0.0330223	0.155801	0.0383337
23	0.000256535	0.256386	0.0381207	0.0391302	0.20769	0.629018	0.0349092	0.0382465	0.192079	0.19365	0.000199651	0.0827683	0.045765	0.108727	0.00351401	0.00173057	0.854199	0.03419	0.0289072	0.00221137	0.0138628	0.462969	1.86423	0.073434	0.0121701	0.0357861	0.0995484	0.0755425
24	0.0113579	0.0211559	0.00172902	0.0423498	0.0372022	0.0464066	0.00015477	0.00606316	0.00246757	0.000821766	0.001655	0.0421126	0.0715777	0.0295274	0.00238363	0.0049807	0.0555493	0.130654	0.0606544	0.0073308	0.014101	0.0110912	0.073434	0.0683068	0.0295261	0.0240275	0.000453897	0.00241867
25	0.000229844	0.000828592	0.000697461	0.0159398	0.0335194	0.0154799	0.0257267	0.00715616	0.0237641	0.00772805	0.00172958	0.00320314	0.0561846	0.0173968	0.0175444	0.00268234	0.00150939	0.0086875	0.0186204	0.000618445	0.0485808	0.00342265	0.0121701	0.0295261	0.0356472	0.0269398	0.000247486	0.00113569
26	0.0355859	0.00253771	0.0254332	0.000298452	0.0170078	1.59818e-05	0.158338	1.24737e-05	0.0357639	0.00138138	0.00248376	0.00518612	0.0119533	0.0234516	0.0452059	0.0282742	0.079505	0.027275	0.0201617	0.000316253	4.01286e-05	0.0330223	0.0357861	0.0240275	0.0269398	0.108992	0.0161641	0.000194882
27	9.40947e-05	0.0221886	0.016308	0.00709921	0.00567279	0.158059	7.43171e-05	0.00607056	0.0174481	0.00101062	0.00374234	0.00356614	0.00678683	0.01855	0.00560472	0.00049478	0.00228321	0.000882996	1.53966e-05	0.0145063	0.000530221	0.155801	0.0995484	0.000453897	0.000247486	0.0161641	0.154954	0.0293642
28	0.000642623	0.00660806	0.000984704	2.5e-07	0.0119377	0.0503958	0.00783402	0.000559796	0.0238486	0.00412292	9.66289e-05	0.001407	1.3456e-06	0.000159012	0.000171872	0.000919302	0.00916423	0.000659462	0.000496844	0.00238535	0.00350819	0.0383337	0.0755425	0.00241867	0.00113569	0.000194882	0.0293642	0.01
29-dimensional	118352	35672.7	1360.47	0.0160348	0.0462004	0.485989	0.191754	0.192699	0.221549	0.00024955	0.0111185	0.088881	0.27053	0.105827	0.0804236	0.085171	0.0844747	0.296093	0.00186363	0.0728871	0.0146028	0.00317353	0.00132018	0.00805826	0.000323431	0.0212407	7.8742e-08	4.47806e-06	0.000836945
2	35672.7	85840	18060.1	0.410482	0.0251772	0.315212	0.387229	1.66035e-06	0.313809	0.00328151	0.185142	0.108951	0.0166783	0.0772274	0.325923	0.0886831	0.917682	0.49522	0.0839595	0.00378168	0.096281	0.0154252	0.309838	0.0107865	0.000475114	0.0245083	0.0154397	0.0222806	0.00512656
3	1360.47	18060.1	41081.1	0.709719	0.256556	0.109313	0.513878	0.0530229	0.166447	0.0324408	0.72698	0.481903	0.204481	0.0296442	0.168919	0.071543	0.0492156	0.972235	0.0222653	0.118073	0.00359071	0.00494107	0.0198314	0.00749877	0.00115413	0.0752887	0.0238507	0.00177991	0.0060047
4	0.0160348	0.410482	0.709719	9.27279	0.0979748	0.124127	0.0767499	0.205598	0.0254146	4.10935e-05	0.0867701	0.0242752	1.56174	0.148224	0.000625686	0.00268229	0.00782543	0.144855	0.059395	0.0299624	0.00145789	0.0135925	0.092067	0.0859348	0.0124492	0.0423218	0.0185335	0.020241	0.0226141
5	0.0462004	0.0251772	0.256556	0.0979748	1.7521	0.0108335	0.102092	0.159983	0.116029	0.152185	0.104422	0.0280951	0.281141	0.0366005	0.00730777	0.0080257	7.13523e-05	0.107086	0.0525208	0.00324078	0.16697	0.0292508	0.121229	0.0794325	0.0282699	0.00934651	0.0164227	0.00130546	0.0234519
6	0.485989	0.315212	0.109313	0.124127	0.0108335	7.40917	0.270675	0.0474025	0.0128128	0.566226	2.82704e-05	0.392964	0.493402	2.93878e-05	0.00598877	0.0734718	0.0729903	0.0323333	0.0617893	0.111883	0.128232	0.264735	0.69707	0.0327056	0.0169592	0.0071005	0.142153	0.07896	0.00354263
7	0.191754	0.387229	0.513878	0.0767499	0.102092	0.270675	4.19056	0.0110474	0.0524629	0.0609374	0.0245576	0.20327	0.0106985	0.00291772	0.0301329	0.376101	0.00658641	0.0850201	0.000436894	0.230872	0.0186291	0.135897	0.044577	5.85631e-05	0.026821	0.20179	1.09747e-05	0.0147258	0.00119647
8	0.192699	1.66035e-06	0.0530229	0.205598	0.159983	0.0474025	0.0110474	4.36348	0.0340959	0.00637006	0.0178657	0.381248	0.282332	0.298857	0.0338438	0.000321251	0.0185536	0.113001	0.047927	0.0161657	0.00674231	0.000311408	0.00716729	0.000192361	0.0100014	0.0565067	0.000549029	0.0301332	0.0249387
9	0.221549	0.313809	0.166447	0.0254146	0.116029	0.0128128	0.0524629	0.0340959	1.99646	0.0146396	0.0705913	0.0625608	0.00613179	0.00133777	0.458285	0.0852667	0.000917431	0.119703	0.03602	0.0837346	0.161517	0.103112	0.136748	0.0113023	0.0209207	0.00198297	0.027466	0.00382709	0.00950625
10	0.00024955	0.00328151	0.0324408	4.10935e-05	0.152185	0.566226	0.0609374	0.00637006	0.0146396	3.24007	0.601778	0.615565	0.0625931	0.0691578	0.0610546	0.00528698	0.0231199	0.037584	0.0483839	0.0357	0.28653	0.019202	0.218967	3.1413e-05	0.00842431	0.000471072	0.000327384	0.0103839	0.00157609
11	0.0111185	0.185142	0.72698	0.0867701	0.104422	2.82704e-05	0.0245576	0.0178657	0.0705913	0.601778	1.61901	0.279579	0.0879663	0.0393601	0.0165839	0.000518909	0.120539	0.21756	0.0455521	0.00905011	0.189788	0.0579316	0.00356433	8.92237e-06	0.00229647	0.00215185	0.00698256	0.00268081	0.00421071
12	0.088881	0.108951	0.481903	0.0242752	0.0280951	0.392964	0.20327	0.381248	0.0625608	0.615565	0.279579	6.31694	0.000948236	0.001479	0.175279	0.347372	0.346702	0.583329	0.0279025	0.173709	2.84617e-06	0.107033	0.134245	0.019633	0.00208477	0.00886593	0.0096782	0.00474442	0.0125574
13	0.27053	0.0166783	0.204481	1.56174	0.281141	0.493402	0.0106985	0.282332	0.00613179	0.0625931	0.0879663	0.000948236	5.95299	0.00213475	0.0915047	0.212516	0.00267794	0.108335	0.0500961	0.00318559	0.216321	0.00394168	0.0377846	0.0804894	0.0549044	0.00463246	0.00529706	0.000638159	0.000774509
14	0.105827	0.0772274	0.0296442	0.148224	0.0366005	2.93878e-05	0.00291772	0.298857	0.00133777	0.0691578	0.0393601	0.001479	0.00213475	0.730671	0.011997	0.0016367	0.184301	0.000561659	0.0558212	0.0329765	0.00507931	0.000421153	0.149369	0.0155996	0.0195393	0.0745059	0.0269204	0.004109	0.00652864
15	0.0804236	0.325923	0.168919	0.000625686	0.00730777	0.00598877	0.0301329	0.0338438	0.458285	0.0610546	0.0165839	0.175279	0.0915047	0.011997	1.21884	0.151222	0.0449476	0.0098433	0.0219961	0.0498955	0.0284001	0.00136151	0.0162582	0.011079	0.0151224	0.00469953	0.00170965	0.00626064	0.00943812
16	0.085171	0.0886831	0.071543	0.00268229	0.0080257	0.0734718	0.376101	0.000321251	0.0852667	0.00528698	0.000518909	0.347372	0.212516	0.0016367	0.151222	0.700112	0.0298218	0.0372963	0.0141327	0.164741	0.0131934	0.0664404	0.000430807	0.0028444	0.00239067	0.0154099	0.000144097	4.58734e-06	0.000880902
17	0.0844747	0.917682	0.0492156	0.00782543	7.13523e-05	0.0729903	0.00658641	0.0185536	0.000917431	0.0231199	0.120539	0.346702	0.00267794	0.184301	0.0449476	0.0298218	2.85937	0.347939	0.140785	0.0623432	0.327437	0.121898	0.907477	0.0450327	0.00121842	0.116899	0.00114501	0.0179841	0.00163378
18	0.296093	0.49522	0.972235	0.144855	0.107086	0.0323333	0.0850201	0.113001	0.119703	0.037584	0.21756	0.583329	0.108335	0.000561659	0.0098433	0.0372963	0.347939	4.70741	0.501247	0.133891	0.0131828	0.0148849	0.0111918	0.182243	0.00675883	3.59968e-06	0.00470315	0.0066048	0.01269
19	0.00186363	0.0839595	0.0222653	0.059395	0.0525208	0.0617893	0.000436894	0.047927	0.03602	0.0483839	0.0455521	0.0279025	0.0500961	0.0558212	0.0219961	0.0141327	0.140785	0.501247	0.882942	0.122324	0.0281434	0.00311465	0.0270352	0.0583954	0.0188333	0.0236577	1.37876e-06	0.000216775	6.35209e-05
20	0.0728871	0.00378168	0.118073	0.0299624	0.00324078	0.111883	0.230872	0.0161657	0.0837346	0.0357	0.00905011	0.173709	0.00318559	0.0329765	0.0498955	0.164741	0.0623432	0.133891	0.122324	0.96935	0.134817	0.0725499	8.65779e-05	0.013647	0.000385198	0.00949262	0.0103861	0.00996648	0.00288476
21	0.0146028	0.096281	0.00359071	0.00145789	0.16697	0.128232	0.0186291	0.00674231	0.161517	0.28653	0.189788	2.84617e-06	0.216321	0.00507931	0.0284001	0.0131934	0.327437	0.0131828	0.0281434	0.134817	0.875049	0.0306774	0.0196265	0.0100516	0.0499599	0.00167003	0.000145086	0.0080012	0.00101315
22	0.00317353	0.0154252	0.00494107	0.0135925	0.0292508	0.264735	0.135897	0.000311408	0.103112	0.019202	0.0579316	0.107033	0.00394168	0.000421153	0.00136151	0.0664404	0.121898	0.0148849	0.00311465	0.0725499	0.0306774	0.728886	0.459258	0.0115723	0.00346722	0.0351521	0.156862	0.0369012	1.51321e-05
23	0.00132018	0.309838	0.0198314	0.092067	0.121229	0.69707	0.044577	0.00716729	0.136748	0.218967	0.00356433	0.134245	0.0377846	0.149369	0.0162582	0.000430807	0.907477	0.0111918	0.0270352	8.65779e-05	0.0196265	0.459258	2.00135	0.0529877	0.0137295	0.0860343	0.0848461	0.11664	0.00493225
24	0.00805826	0.0107865	0.00749877	0.0859348	0.0794325	0.0327056	5.85631e-05	0.000192361	0.0113023	3.1413e-05	8.92237e-06	0.019633	0.0804894	0.0155996	0.011079	0.0028444	0.0450327	0.182243	0.0583954	0.013647	0.0100516	0.0115723	0.0529877	0.0870841	0.0276098	0.00474257	0.00170948	3.56486e-05	0.00337445
25	0.000323431	0.000475114	0.00115413	0.0124492	0.0282699	0.0169592	0.026821	0.0100014	0.0209207	0.00842431	0.00229647	0.00208477	0.0549044	0.0195393	0.0151224	0.00239067	0.00121842	0.00675883	0.0188333	0.000385198	0.0499599	0.00346722	0.0137295	0.0276098	0.0360078	0.0319003	0.000364767	0.00184609	9.52576e-05
26	0.0212407	0.0245083	0.0752887	0.0423218	0.00934651	0.0071005	0.20179	0.0565067	0.00198297	0.000471072	0.00215185	0.00886593	0.00463246	0.0745059	0.00469953	0.0154099	0.116899	3.59968e-06	0.0236577	0.00949262	0.00167003	0.0351521	0.0860343	0.00474257	0.0319003	0.302543	0.0317902	0.0239465	0.0219899
27	7.8742e-08	0.0154397	0.0238507	0.0185335	0.0164227	0.142153	1.09747e-05	0.000549029	0.027466	0.000327384	0.00698256	0.0096782	0.00529706	0.0269204	0.00170965	0.000144097	0.00114501	0.00470315	1.37876e-06	0.0103861	0.000145086	0.156862	0.0848461	0.00170948	0.000364767	0.0317902	0.164467	0.0192115	0.00119025
28	4.47806e-06	0.0222806	0.00177991	0.020241	0.00130546	0.07896	0.0147258	0.0301332	0.00382709	0.0103839	0.00268081	0.00474442	0.000638159	0.004109	0.00626064	4.58734e-06	0.0179841	0.0066048	0.000216775	0.00996648	0.0080012	0.0369012	0.11664	3.56486e-05	0.00184609	0.0239465	0.0192115	0.0361517	0.0090136
29	0.000836945	0.00512656	0.0060047	0.0226141	0.0234519	0.00354263	0.00119647	0.0249387	0.00950625	0.00157609	0.00421071	0.0125574	0.000774509	0.00652864	0.00943812	0.000880902	0.00163378	0.01269	6.35209e-05	0.00288476	0.00101315	1.51321e-05	0.00493225	0.00337445	9.52576e-05	0.0219899	0.00119025	0.0090136	0.01
30-dimensional	118551	35735	1352.36	0.0605377	0.156758	0.315251	0.21243	0.119218	0.105377	4.09885e-05	0.00452012	0.194637	0.0301429	0.0300305	0.156741	0.0386116	0.0893018	0.512834	0.00446244	0.267584	0.240379	0.137052	0.0861963	0.0152542	0.111951	0.0527862	0.0288714	0.0340252	0.00106384	0.0288626
2	35735	85895.1	18043.2	0.502477	0.00306477	0.234255	0.371059	0.00300008	0.414182	0.00269584	0.279684	0.0617122	0.00471365	0.132989	0.256829	0.0592299	0.92666	0.366686	0.0919591	0.00634866	0.271633	0.00302197	0.554974	0.00715683	0.041018	0.0418235	0.0488813	0.00204109	0.00482963	0.00940512
3	1352.36	18043.2	41098.1	0.788537	0.19139	0.0777756	0.501375	0.0707582	0.215012	0.0311628	0.843631	0.409127	0.341479	0.0529727	0.13554	0.0534116	0.0506112	0.847178	0.0250365	0.191798	0.00655963	0.00244285	0.0711105	0.00543555	0.0239425	0.0587308	0.0480222	0.0124856	0.0062246	0.00419904
4	0.0605377	0.502477	0.788537	9.57613	0.150458	0.0877288	0.0715672	0.242256	0.00979785	6.36746e-06	0.133964	0.00933556	1.94061	0.20061	0.000460317	0.000152376	0.00843632	0.20408	0.0547249	0.0758548	0.0131493	0.000176197	0.193537	0.0943141	0.0588395	0.0578312	0.00434984	0.00446605	0.0221577	0.00494068
5	0.156758	0.00306477	0.19139	0.150458	2.06541	0.000361762	0.111517	0.210433	0.186819	0.156816	0.186125	0.0662106	0.558765	0.08216	0.0243087	0.0223117	0.000184465	0.189295	0.0595323	0.00963301	0.409959	0.135308	0.0199653	0.0918057	0.134444	0.0223073	0.000474413	0.00611642	0.0227492	0.0113486
6	0.315251	0.234255	0.0777756	0.0877288	0.000361762	7.76035	0.259542	0.0685174	0.0330689	0.572891	0.00747819	0.481778	0.748723	0.00590912	0.000605076	0.0997729	0.0709255	0.0679368	0.0563908	0.0476337	0.282745	0.438306	0.46218	0.0386929	0.077861	0.00200513	0.0883881	0.13447	0.0037519	0.00637602
7	0.21243	0.371059	0.501375	0.0715672	0.111517	0.259542	4.19807	0.0126729	0.0472654	0.0605682	0.0290603	0.21368	0.00574828	0.00437337	0.0333207	0.385478	0.00648091	0.0932011	0.000361707	0.212319	0.0275337	0.154966	0.0563718	0.000106951	0.0191928	0.207851	0.00010418	0.0114099	0.00117623	0.000183332
8	0.119218	0.00300008	0.0707582	0.242256	0.210433	0.0685174	0.0126729	4.49147	0.0188328	0.00589254	0.0359926	0.32606	0.414521	0.355248	0.0217584	0.00238863	0.0178365	0.0785839	0.0513447	0.00219609	0.00143017	0.0142889	0.000503619	0.000616143	7.67556e-06	0.070216	0.00616204	0.0130866	0.0245622	0.00304152
9	0.105377	0.414182	0.215012	0.00979785	0.186819	0.0330689	0.0472654	0.0188328	2.21083	0.0158127	0.124666	0.0315867	0.00942047	0.0128846	0.384557	0.0594154	0.00118566	0.0670518	0.0407027	0.0269644	0.346761	0.23036	0.0411363	0.0152246	0.0929472	4.05415e-06	0.00638045	0.0237609	0.00914591	0.00739256
10	4.09885e-05	0.00269584	0.0311628	6.36746e-06	0.156816	0.572891	0.0605682	0.00589254	0.0158127	3.24117	0.61053	0.622893	0.068364	0.0665797	0.0628746	0.0048453	0.023201	0.0354448	0.0487229	0.0327228	0.299549	0.0221379	0.209031	4.493e-05	0.0104223	0.000359846	0.000158056	0.0116287	0.00158563	3.05809e-05
11	0.00452012	0.279684	0.843631	0.133964	0.186125	0.00747819	0.0290603	0.0359926	0.124666	0.61053	1.89258	0.377406	0.253911	0.0837183	0.00379264	0.00637122	0.123965	0.132164	0.051787	0.00279051	0.43122	0.183586	0.0189566	0.000536976	0.0563292	1.49999e-05	0.0342432	0.0258781	0.00450182	0.0103307
12	0.194637	0.0617122	0.409127	0.00933556	0.0662106	0.481778	0.21368	0.32606	0.0315867	0.622893	0.377406	6.67835	0.0410175	0.00136046	0.224987	0.405305	0.341939	0.720794	0.0241268	0.0865621	0.0341467	0.233017	0.0411595	0.0245988	0.0123779	0.00275858	0.0332886	0.0253611	0.0129703	0.00708964
13	0.0301429	0.00471365	0.341479	1.94061	0.558765	0.748723	0.00574828	0.414521	0.00942047	0.068364	0.253911	0.0410175	8.156	0.0523068	0.191262	0.331151	0.00175711	0.0150488	0.063601	0.0578227	0.825617	0.0986169	0.040686	0.105114	0.377508	0.00107558	0.0764163	0.0374997	0.00054775	0.0415997
14	0.0300305	0.132989	0.0529727	0.20061	0.08216	0.00590912	0.00437337	0.355248	0.0128846	0.0665797	0.0837183	0.00136046	0.0523068	0.873963	0.00253768	0.00822148	0.188022	0.0044731	0.0618576	0.0972506	0.0152063	0.0345351	0.313884	0.0114764	0.000727486	0.100619	0.00558438	0.00102	0.00621863	0.00800667
15	0.156741	0.256829	0.13554	0.000460317	0.0243087	0.000605076	0.0333207	0.0217584	0.384557	0.0628746	0.00379264	0.224987	0.191262	0.00253768	1.31725	0.181453	0.0436066	0.0276014	0.0248084	0.10215	0.00061308	0.0252927	7.71068e-07	0.00848746	5.25849e-08	0.0102505	0.000608258	0.022524	0.00971892	0.00437053
16	0.0386116	0.0592299	0.0534116	0.000152376	0.0223117	0.0997729	0.385478	0.00238863	0.0594154	0.0048453	0.00637122	0.405305	0.331151	0.00822148	0.181453	0.753809	0.0288949	0.0624664	0.0123376	0.105099	0.0561221	0.13064	0.0168327	0.00415746	0.00310146	0.02307	0.0019388	0.00337466	0.000954674	0.00314945
17	0.0893018	0.92666	0.0506112	0.00843632	0.000184465	0.0709255	0.00648091	0.0178365	0.00118566	0.023201	0.123965	0.341939	0.00175711	0.188022	0.0436066	0.0288949	2.86016	0.342207	0.141289	0.0658962	0.339542	0.115759	0.925399	0.0446273	0.0019262	0.118535	0.00149388	0.0166233	0.00162533	2.32324e-05
18	0.512834	0.366686	0.847178	0.20408	0.189295	0.0679368	0.0932011	0.0785839	0.0670518	0.0354448	0.132164	0.720794	0.0150488	0.0044731	0.0276014	0.0624664	0.342207	5.16258	0.481507	0.0477645	0.011092	0.0954971	0.00824417	0.199812	0.0733675	0.00269938	0.00105616	0.000749678	0.0121999	0.0102475
19	0.00446244	0.0919591	0.0250365	0.0547249	0.0595323	0.0563908	0.000361707	0.0513447	0.0407027	0.0487229	0.051787	0.0241268	0.063601	0.0618576	0.0248084	0.0123376	0.141289	0.481507	0.886582	0.136898	0.0392074	0.00664351	0.0188817	0.0570679	0.0123903	0.025821	0.000226904	0.000879294	5.88006e-05	0.000193488
20	0.267584	0.00634866	0.191798	0.0758548	0.00963301	0.0476337	0.212319	0.00219609	0.0269644	0.0327228	0.00279051	0.0865621	0.0578227	0.0972506	0.10215	0.105099	0.0658962	0.0477645	0.136898	1.43152	0.00256211	1.68397e-07	0.085265	0.00772817	0.0633316	0.000647484	0.00188698	0.0655732	0.00323407	0.0211906
21	0.240379	0.271633	0.00655963	0.0131493	0.409959	0.282745	0.0275337	0.00143017	0.346761	0.299549	0.43122	0.0341467	0.825617	0.0152063	0.00061308	0.0561221	0.339542	0.011092	0.0392074	0.00256211	1.98339	0.332822	0.079644	0.0205765	0.395359	0.00444462	0.0420613	0.104232	0.00133582	0.0472889
22	0.137052	0.00302197	0.00244285	0.000176197	0.135308	0.438306	0.154966	0.0142889	0.23036	0.0221379	0.183586	0.233017	0.0986169	0.0345351	0.0252927	0.13064	0.115759	0.0954971	0.00664351	1.68397e-07	0.332822	1.4282	0.101698	0.0208126	0.0814629	0.077756	0.0447682	0.152404	1.41789e-08	0.0341326
23	0.0861963	0.554974	0.0711105	0.193537	0.0199653	0.46218	0.0563718	0.000503619	0.0411363	0.209031	0.0189566	0.0411595	0.040686	0.313884	7.71068e-07	0.0168327	0.925399	0.00824417	0.0188817	0.085265	0.079644	0.101698	3.21065	0.0367191	0.0598968	0.151592	0.235412	0.0177133	0.00435809	0.0377136
24	0.0152542	0.00715683	0.00543555	0.0943141	0.0918057	0.0386929	0.000106951	0.000616143	0.0152246	4.493e-05	0.000536976	0.0245988	0.105114	0.0114764	0.00848746	0.00415746	0.0446273	0.199812	0.0570679	0.00772817	0.0205765	0.0208126	0.0367191	0.0894275	0.0412793	0.00348638	0.000462925	0.000235472	0.00332456	0.00039442
25	0.111951	0.041018	0.0239425	0.0588395	0.134444	0.077861	0.0191928	7.67556e-06	0.0929472	0.0104223	0.0563292	0.0123779	0.377508	0.000727486	5.25849e-08	0.00310146	0.0019262	0.0733675	0.0123903	0.0633316	0.395359	0.0814629	0.0598968	0.0412793	0.288431	0.00747386	0.0420986	0.0590424	0.000190551	0.03473
26	0.0527862	0.0418235	0.0587308	0.0578312	0.0223073	0.00200513	0.207851	0.070216	4.05415e-06	0.000359846	1.49999e-05	0.00275858	0.00107558	0.100619	0.0102505	0.02307	0.118535	0.00269938	0.025821	0.000647484	0.00444462	0.077756	0.151592	0.00348638	0.00747386	0.330041	0.016621	0.0103372	0.0216728	0.0024453
27	0.0288714	0.0488813	0.0480222	0.00434984	0.000474413	0.0883881	0.00010418	0.00616204	0.00638045	0.000158056	0.0342432	0.0332886	0.0764163	0.00558438	0.000608258	0.0019388	0.00149388	0.00105616	0.000226904	0.00188698	0.0420613	0.0447682	0.235412	0.000462925	0.0420986	0.016621	0.255273	0.000988266	0.00134445	0.00997002
28	0.0340252	0.00204109	0.0124856	0.00446605	0.00611642	0.13447	0.0114099	0.0130866	0.0237609	0.0116287	0.0258781	0.0253611	0.0374997	0.00102	0.022524	0.00337466	0.0166233	0.000749678	0.000879294	0.0655732	0.104232	0.152404	0.0177133	0.000235472	0.0590424	0.0103372	0.000988266	0.0932284	0.00946127	0.0115197
29	0.00106384	0.00482963	0.0062246	0.0221577	0.0227492	0.0037519	0.00117623	0.0245622	0.00914591	0.00158563	0.00450182	0.0129703	0.00054775	0.00621863	0.00971892	0.000954674	0.00162533	0.0121999	5.88006e-05	0.00323407	0.00133582	1.41789e-08	0.00435809	0.00332456	0.000190551	0.0216728	0.00134445	0.00946127	0.0100094	4.7089e-06
30	0.0288626	0.00940512	0.00419904	0.00494068	0.0113486	0.00637602	0.000183332	0.00304152	0.00739256	3.05809e-05	0.0103307	0.00708964	0.0415997	0.00800667	0.00437053	0.00314945	2.32324e-05	0.0102475	0.000193488	0.0211906	0.0472889	0.0341326	0.0377136	0.00039442	0.03473	0.0024453	0.00997002	0.0115197	4.7089e-06	0.01
31-dimensional	118555	35735.9	1356.06	0.0608078	0.160522	0.303999	0.212033	0.130777	0.10191	0.00106227	0.00431874	0.199615	0.0447619	0.0343145	0.144634	0.0380673	0.0710076	0.490265	0.00742012	0.222921	0.208979	0.162913	0.103493	0.0255609	0.111987	0.0579555	0.0236785	0.0309131	0.000116728	0.0281619	0.000598781
2	35735.9	85895.6	18048.7	0.502789	0.0028578	0.230331	0.37127	0.0023224	0.416977	0.00390174	0.27904	0.0605962	0.00284928	0.129504	0.263232	0.0589578	0.90175	0.374495	0.0967409	0.00378325	0.257905	0.00468192	0.571962	0.00489412	0.0410268	0.043652	0.0460683	0.00236735	0.0061271	0.00924381	9.70225e-05
3	1356.06	18048.7	41268.8	0.780399	0.22761	0.132224	0.496277	0.162445	0.175187	0.0018471	0.867113	0.471442	0.814427	0.1091	0.0563747	0.0589318	0.246215	0.619161	1.48494e-05	0.666308	0.128713	0.0532069	0.000964606	0.143301	0.0238031	0.111843	0.125002	0.0339059	0.0684939	0.00675546	0.0420619
4	0.0608078	0.502789	0.780399	9.57644	0.150794	0.0871813	0.0715883	0.240784	0.00970049	2.42148e-05	0.133862	0.00923665	1.93094	0.199631	0.00040109	0.000149251	0.00790091	0.202764	0.0538998	0.0735958	0.0124627	0.00026677	0.195808	0.0963701	0.0588418	0.0583159	0.00454565	0.00457236	0.0227562	0.00491402	5.0176e-06
5	0.160522	0.0028578	0.22761	0.150794	2.07615	0.000121907	0.11129	0.198761	0.190511	0.140875	0.185095	0.0685068	0.514887	0.0768435	0.0206222	0.0226405	0.000142939	0.178511	0.0672122	0.00390959	0.377152	0.155405	0.0141884	0.110022	0.134475	0.0249724	0.00118589	0.00509669	0.0282379	0.0110024	0.000372876
6	0.303999	0.230331	0.132224	0.0871813	0.000121907	7.85576	0.260284	0.0548254	0.0364593	0.5079	0.00704237	0.495009	0.641922	0.00321424	0.00259444	0.101261	0.103018	0.054634	0.041948	0.0867153	0.226361	0.51621	0.399892	0.0666254	0.0779117	0.000687802	0.105224	0.123985	0.000596341	0.00582872	0.00170734
7	0.212033	0.37127	0.496277	0.0715883	0.11129	0.260284	4.1982	0.012939	0.047434	0.0596446	0.0290974	0.213307	0.0053418	0.00448778	0.0337316	0.385354	0.00611156	0.0939022	0.000416549	0.209338	0.0283304	0.15308	0.0554157	5.96882e-05	0.0191939	0.207131	0.000129058	0.0112776	0.00107108	0.000187396	3.0976e-06
8	0.130777	0.0023224	0.162445	0.240784	0.198761	0.0548254	0.012939	4.68272	0.0230857	2.75147e-05	0.0375791	0.343777	0.558713	0.395207	0.0110074	0.00203205	0.00204159	0.0560814	0.0302015	0.00583702	0.0164657	0.000799776	0.00295081	0.00554911	6.88263e-06	0.055216	0.0149555	0.00824633	0.00944005	0.00369863	0.00446491
9	0.10191	0.416977	0.175187	0.00970049	0.190511	0.0364593	0.047434	0.0230857	2.22526	0.0104431	0.123706	0.0298198	0.00395912	0.0105602	0.402153	0.0588075	2.8357e-05	0.07468	0.0480239	0.0419472	0.312541	0.260118	0.031519	0.0243677	0.0929767	6.19211e-05	0.00889307	0.021426	0.0132835	0.00707509	0.00048444
10	0.00106227	0.00390174	0.0018471	2.42148e-05	0.140875	0.5079	0.0596446	2.75147e-05	0.0104431	3.66677	0.620927	0.584789	0.182729	0.0423404	0.101741	0.0057286	0.0863572	0.0140588	0.0185359	0.000273695	0.479241	6.84963e-06	0.33658	0.0232184	0.0103743	0.00449249	0.00331493	0.0212046	0.0182862	0.000213339	0.0114554
11	0.00431874	0.27904	0.867113	0.133862	0.185095	0.00704237	0.0290974	0.0375791	0.123706	0.620927	1.89364	0.375665	0.263679	0.0854765	0.00332225	0.00631522	0.129796	0.129249	0.0495844	0.00412729	0.442301	0.176413	0.017049	0.000195232	0.0563228	1.19609e-06	0.0357612	0.0265859	0.0052727	0.0104377	3.83161e-05
12	0.199615	0.0605962	0.471442	0.00923665	0.0685068	0.495009	0.213307	0.343777	0.0298198	0.584789	0.375665	6.7055	0.0278871	0.000660357	0.211347	0.406964	0.378291	0.695684	0.01883	0.113216	0.0236419	0.264203	0.0311731	0.0364394	0.0123891	0.00178384	0.0280349	0.0228507	0.00873574	0.00676625	0.000524868
13	0.0447619	0.00284928	0.814427	1.93094	0.514887	0.641922	0.0053418	0.558713	0.00395912	0.182729	0.263679	0.0278871	9.58789	0.092685	0.287506	0.321089	0.0266348	0.000469689	0.0168005	0.277283	1.25149	0.0104475	0.000553605	0.00877741	0.377089	0.00135747	0.14295	0.0617019	0.013191	0.0471378	0.024056
14	0.0343145	0.129504	0.1091	0.199631	0.0768435	0.00321424	0.00448778	0.395207	0.0105602	0.0423404	0.0854765	0.000660357	0.092685	0.919112	0.000370608	0.00772621	0.248197	0.00973761	0.044151	0.161545	0.035891	0.0141965	0.254174	0.0322935	0.000721702	0.0871908	0.00182547	0.00241812	0.0012483	0.00876485	0.00238437
15	0.144634	0.263232	0.0563747	0.00040109	0.0206222	0.00259444	0.0337316	0.0110074	0.402153	0.101741	0.00332225	0.211347	0.287506	0.000370608	1.41216	0.178382	0.0155067	0.0431161	0.0114775	0.191136	0.00379074	0.00518214	0.005234	0.0349182	7.93632e-09	0.00527443	0.00441402	0.029784	0.0241499	0.00511442	0.00406279
16	0.0380673	0.0589578	0.0589318	0.000149251	0.0226405	0.101261	0.385354	0.00203205	0.0588075	0.0057286	0.00631522	0.406964	0.321089	0.00772621	0.178382	0.754369	0.0315051	0.0606312	0.0113605	0.112002	0.0525363	0.136308	0.0185685	0.00531741	0.00310285	0.0238512	0.00162482	0.00314572	0.000667429	0.00309562	3.22624e-05
17	0.0710076	0.90175	0.246215	0.00790091	0.000142939	0.103018	0.00611156	0.00204159	2.8357e-05	0.0863572	0.129796	0.378291	0.0266348	0.248197	0.0155067	0.0315051	3.48233	0.248864	0.07364	0.250665	0.580372	0.271282	0.656177	0.166313	0.00190075	0.0811728	0.015707	0.0067646	0.00601745	0.000257115	0.0174901
18	0.490265	0.374495	0.619161	0.202764	0.178511	0.054634	0.0939022	0.0560814	0.07468	0.0140588	0.129249	0.695684	0.000469689	0.00973761	0.0431161	0.0606312	0.248864	5.35708	0.555579	0.00968729	0.0374488	0.0484404	0.000255601	0.122651	0.0732899	0.000516046	0.00565178	0.0025369	0.00274632	0.011396	0.00424061
19	0.00742012	0.0967409	1.48494e-05	0.0538998	0.0672122	0.041948	0.000416549	0.0302015	0.0480239	0.0185359	0.0495844	0.01883	0.0168005	0.044151	0.0114775	0.0113605	0.07364	0.555579	1.0081	0.0502707	0.00827562	0.0358871	0.00217351	0.0147444	0.0123516	0.0384841	0.00134931	3.08106e-06	0.00610203	5.1959e-05	0.00624574
20	0.222921	0.00378325	0.666308	0.0735958	0.00390959	0.0867153	0.209338	0.00583702	0.0419472	0.000273695	0.00412729	0.113216	0.277283	0.161545	0.191136	0.112002	0.250665	0.00968729	0.0502707	2.36161	0.0396921	0.063676	0.00641321	0.131108	0.0631275	0.011723	0.027008	0.103163	0.0489761	0.0259896	0.0340292
21	0.208979	0.257905	0.128713	0.0124627	0.377152	0.226361	0.0283304	0.0164657	0.312541	0.479241	0.442301	0.0236419	1.25149	0.035891	0.00379074	0.0525363	0.580372	0.0374488	0.00827562	0.0396921	2.53373	0.153614	0.0160324	0.0033477	0.394984	3.42859e-05	0.0863514	0.137388	0.024737	0.052416	0.018344
22	0.162913	0.00468192	0.0532069	0.00026677	0.155405	0.51621	0.15308	0.000799776	0.260118	6.84963e-06	0.176413	0.264203	0.0104475	0.0141965	0.00518214	0.136308	0.271282	0.0484404	0.0358871	0.063676	0.153614	1.90878	0.0262472	0.120582	0.0816345	0.115714	0.0906569	0.117087	0.0147913	0.0299875	0.0186514
23	0.103493	0.571962	0.000964606	0.195808	0.0141884	0.399892	0.0554157	0.00295081	0.031519	0.33658	0.017049	0.0311731	0.000553605	0.254174	0.005234	0.0185685	0.656177	0.000255601	0.00217351	0.00641321	0.0160324	0.0262472	3.70102	0.000435816	0.0600206	0.194418	0.168018	0.0301523	0.0283653	0.0340248	0.0131974
24	0.0255609	0.00489412	0.143301	0.0963701	0.110022	0.0666254	5.96882e-05	0.00554911	0.0243677	0.0232184	0.000195232	0.0364394	0.00877741	0.0322935	0.0349182	0.00531741	0.166313	0.122651	0.0147444	0.131108	0.0033477	0.120582	0.000435816	0.270351	0.0414123	5.91252e-05	0.0141438	0.00137799	0.0361562	5.26521e-05	0.0220909
25	0.111987	0.0410268	0.0238031	0.0588418	0.134475	0.0779117	0.0191939	6.88263e-06	0.0929767	0.0103743	0.0563228	0.0123891	0.377089	0.000721702	7.93632e-09	0.00310285	0.00190075	0.0732899	0.0123516	0.0631275	0.394984	0.0816345	0.0600206	0.0414123	0.288432	0.00745679	0.0420394	0.0590046	0.000185175	0.0347231	4.84e-08
26	0.0579555	0.043652	0.111843	0.0583159	0.0249724	0.000687802	0.207131	0.055216	6.19211e-05	0.00449249	1.19609e-06	0.00178384	0.00135747	0.0871908	0.00527443	0.0238512	0.0811728	0.000516046	0.0384841	0.011723	3.42859e-05	0.115714	0.194418	5.91252e-05	0.00745679	0.353611	0.0250747	0.0138113	0.0350591	0.00208324	0.00201601
27	0.0236785	0.0460683	0.125002	0.00454565	0.00118589	0.105224	0.000129058	0.0149555	0.00889307	0.00331493	0.0357612	0.0280349	0.14295	0.00182547	0.00441402	0.00162482	0.015707	0.00565178	0.00134931	0.027008	0.0863514	0.0906569	0.168018	0.0141438	0.0420394	0.0250747	0.300523	6.89078e-05	0.00904194	0.0111108	0.00429549
28	0.0309131	0.00236735	0.0339059	0.00457236	0.00509669	0.123985	0.0112776	0.00824633	0.021426	0.0212046	0.0265859	0.0228507	0.0617019	0.00241812	0.029784	0.00314572	0.0067646	0.0025369	3.08106e-06	0.103163	0.137388	0.117087	0.0301523	0.00137799	0.0590046	0.0138113	6.89078e-05	0.100993	0.0165728	0.0121713	0.00124609
29	0.000116728	0.0061271	0.0684939	0.0227562	0.0282379	0.000596341	0.00107108	0.00944005	0.0132835	0.0182862	0.0052727	0.00873574	0.013191	0.0012483	0.0241499	0.000667429	0.00601745	0.00274632	0.00610203	0.0489761	0.024737	0.0147913	0.0283653	0.0361562	0.000185175	0.0350591	0.00904194	0.0165728	0.0322226	9.46548e-05	0.00794594
30	0.0281619	0.00924381	0.00675546	0.00491402	0.0110024	0.00582872	0.000187396	0.00369863	0.00707509	0.000213339	0.0104377	0.00676625	0.0471378	0.00876485	0.00511442	0.00309562	0.000257115	0.011396	5.1959e-05	0.0259896	0.052416	0.0299875	0.0340248	5.26521e-05	0.0347231	0.00208324	0.0111108	0.0121713	9.46548e-05	0.0101443	7.19104e-05
31	0.000598781	9.70225e-05	0.0420619	5.0176e-06	0.000372876	0.00170734	3.0976e-06	0.00446491	0.00048444	0.0114554	3.83161e-05	0.000524868	0.024056	0.00238437	0.00406279	3.22624e-05	0.0174901	0.00424061	0.00624574	0.0340292	0.018344	0.0186514	0.0131974	0.0220909	4.84e-08	0.00201601	0.00429549	0.00124609	0.00794594	7.19104e-05	0.01
32-dimensional	118582	35739.3	1356.72	0.0460743	0.123739	0.249301	0.238201	0.143607	0.0393141	0.000157867	0.00455466	0.194206	0.0786677	0.035637	0.0496658	0.0537577	0.0953737	0.382428	0.0354707	0.251711	0.177126	0.0925776	0.144412	0.0421628	0.120769	0.103496	0.0139118	0.0121431	0.000574856	0.0166484	0.00811379	0.00402971
2	35739.3	85896.8	18049.2	0.492848	0.00412675	0.219443	0.363893	0.00196875	0.45214	0.00336945	0.279453	0.0612597	0.00145784	0.128943	0.300069	0.0629593	0.919577	0.396896	0.111269	0.0046278	0.249843	0.00216334	0.591579	0.00359191	0.042185	0.0514326	0.0427296	0.00398523	0.00568076	0.00767213	0.000591414	0.000196
3	1356.72	18049.2	41269.7	0.793012	0.217345	0.140786	0.504967	0.165569	0.153375	0.00148378	0.866379	0.469582	0.842347	0.109621	0.0409605	0.0550272	0.236948	0.590845	0.000707633	0.655608	0.134572	0.0434931	0.000326824	0.151064	0.0229271	0.124223	0.130721	0.0394989	0.0669678	0.00824919	0.0482652	0.000199657
4	0.0460743	0.492848	0.793012	9.7338	0.182391	0.113254	0.0837691	0.25445	0.03778	0.000432508	0.132837	0.00833145	2.08573	0.202143	0.0209774	0.000286064	0.00305959	0.26535	0.0980776	0.0614303	0.0197106	0.00904286	0.157036	0.075296	0.0539951	0.0314366	0.00151635	0.000243311	0.0260154	0.0101698	0.00247663	0.0025321
5	0.123739	0.00412675	0.217345	0.182391	2.25057	0.0055052	0.0900802	0.217942	0.0839496	0.123226	0.183251	0.0724315	0.641842	0.07924	0.111965	0.038044	0.00401155	0.272189	0.0182993	0.000710926	0.433146	0.264968	0.0360455	0.0764788	0.123265	0.00357609	8.37381e-05	0.0228022	0.0338637	0.0230875	0.00363366	0.00593054
6	0.249301	0.219443	0.140786	0.113254	0.0055052	8.2373	0.225187	0.0448456	0.120551	0.545449	0.00743163	0.483992	0.507199	0.00271715	0.0646914	0.0733001	0.0708874	0.016406	0.00529755	0.0656807	0.183959	0.348237	0.310289	0.100392	0.087473	0.00614308	0.137493	0.0714671	0.00171704	0.00068843	0.0158955	0.00672564
7	0.238201	0.363893	0.504967	0.0837691	0.0900802	0.225187	4.27596	0.0103815	0.0182209	0.0531352	0.0295126	0.209471	0.0144633	0.00416931	0.00575591	0.354751	0.00241867	0.0627228	0.00245587	0.191227	0.0205862	0.104478	0.0758054	0.00150913	0.0168294	0.260661	0.000175244	0.0228387	0.000562134	0.000165503	0.00186243	0.00188877
8	0.143607	0.00196875	0.165569	0.25445	0.217942	0.0448456	0.0103815	4.715	0.0415908	0.000191973	0.0372845	0.340711	0.603876	0.397121	0.00138598	0.00370594	0.00401853	0.0406657	0.0168615	0.0040566	0.0207115	0.00504024	0.00630276	0.00884253	8.47355e-06	0.040069	0.0189719	0.00391837	0.0105725	0.00600478	0.0090296	0.000744744
9	0.0393141	0.45214	0.153375	0.03778	0.0839496	0.120551	0.0182209	0.0415908	3.44023	0.0263435	0.127473	0.0364718	0.02071	0.0084916	1.2249	0.124472	0.0175439	0.269101	0.276564	0.0134736	0.202644	0.0448525	6.27876e-06	0.0855839	0.118035	0.0629522	0.0408641	0.00256076	0.00573305	0.0010437	0.0479317	0.0363055
10	0.000157867	0.00336945	0.00148378	0.000432508	0.123226	0.545449	0.0531352	0.000191973	0.0263435	3.70499	0.622315	0.580166	0.154623	0.0430667	0.057944	0.00882694	0.0991722	0.0253497	0.0349462	0.000975723	0.454601	0.00218695	0.303792	0.0168436	0.0117186	0.000717385	0.00157753	0.0127694	0.0200996	2.18174e-05	0.00553879	0.000995403
11	0.00455466	0.279453	0.866379	0.132837	0.183251	0.00743163	0.0295126	0.0372845	0.127473	0.622315	1.89385	0.375337	0.260578	0.0853857	0.00416786	0.00606112	0.131141	0.131846	0.051605	0.00429592	0.440182	0.172764	0.0177248	0.000255056	0.0565916	2.16439e-05	0.0351664	0.0256536	0.00535711	0.0100923	1.09332e-05	7.7841e-06
12	0.194206	0.0612597	0.469582	0.00833145	0.0724315	0.483992	0.209471	0.340711	0.0364718	0.580166	0.375337	6.71028	0.0314761	0.000688125	0.233807	0.414085	0.386211	0.716468	0.0233104	0.116245	0.0253591	0.279876	0.0343649	0.0338621	0.0119595	0.00296811	0.029884	0.0259496	0.00836734	0.00776563	0.000168699	9.216e-05
13	0.0786677	0.00145784	0.842347	2.08573	0.641842	0.507199	0.0144633	0.603876	0.02071	0.154623	0.260578	0.0314761	10.3315	0.096403	0.648722	0.396254	0.00824051	0.0139648	0.00203743	0.2266	1.39414	0.0740469	0.00580419	0.000254568	0.350537	0.0307299	0.193184	0.130045	0.00852445	0.0803363	0.071442	0.0117831
14	0.035637	0.128943	0.109621	0.202143	0.07924	0.00271715	0.00416931	0.397121	0.0084916	0.0430667	0.0853857	0.000688125	0.096403	0.919707	2.9549e-05	0.00830346	0.244507	0.0112053	0.0404631	0.159467	0.0371073	0.0163501	0.249042	0.0337429	0.000662286	0.0830456	0.00156602	0.00301759	0.0013313	0.00941367	0.0029797	3.10249e-05
15	0.0496658	0.300069	0.0409605	0.0209774	0.111965	0.0646914	0.00575591	0.00138598	1.2249	0.057944	0.00416786	0.233807	0.648722	2.9549e-05	3.25273	0.320285	0.0841066	0.27792	0.0853636	0.10348	0.0413383	0.211787	0.0901121	0.132845	0.00252118	0.0594077	0.0427758	0.184036	0.0108027	0.0497564	0.102451	0.0615189
16	0.0537577	0.0629593	0.0550272	0.000286064	0.038044	0.0733001	0.354751	0.00370594	0.124472	0.00882694	0.00606112	0.414085	0.396254	0.00830346	0.320285	0.813706	0.0467083	0.102921	0.0399132	0.130774	0.0687972	0.211424	0.00690368	0.000990081	0.00193276	0.00649631	0.00533993	0.0134406	0.000191061	0.00828266	0.00293215	0.00335125
17	0.0953737	0.919577	0.236948	0.00305959	0.00401155	0.0708874	0.00241867	0.00401853	0.0175439	0.0991722	0.131141	0.386211	0.00824051	0.244507	0.0841066	0.0467083	3.65045	0.342013	0.143474	0.282743	0.523729	0.390972	0.759228	0.129626	0.00326365	0.136907	0.00766744	0.0228682	0.008357	0.000611628	0.00400624	0.00445156
18	0.382428	0.396896	0.590845	0.26535	0.272189	0.016406	0.0627228	0.0406657	0.269101	0.0253497	0.131846	0.716468	0.0139648	0.0112053	0.27792	0.102921	0.342013	6.15293	0.90778	0.0250969	0.0713655	0.177862	0.0104767	0.0665434	0.0598264	0.0200523	0.0219325	0.0336914	0.00626275	0.0343981	0.0393093	0.0165972
19	0.0354707	0.111269	0.000707633	0.0980776	0.0182993	0.00529755	0.00245587	0.0168615	0.276564	0.0349462	0.051605	0.0233104	0.00203743	0.0404631	0.0853636	0.0399132	0.143474	0.90778	1.59573	0.0895112	1.07196e-06	0.00391157	0.0102545	3.77206e-05	0.00616052	0.161215	0.0163465	0.0271182	0.00199899	0.00830953	0.0602276	0.0259178
20	0.251711	0.0046278	0.655608	0.0614303	0.000710926	0.0656807	0.191227	0.0040566	0.0134736	0.000975723	0.00429592	0.116245	0.2266	0.159467	0.10348	0.130774	0.282743	0.0250969	0.0895112	2.42874	0.0297956	0.105776	0.015095	0.108069	0.0679626	0.00238854	0.0190391	0.0745543	0.0533465	0.0176249	0.0185886	0.00216876
21	0.177126	0.249843	0.134572	0.0197106	0.433146	0.183959	0.0205862	0.0207115	0.202644	0.454601	0.440182	0.0253591	1.39414	0.0371073	0.0413383	0.0687972	0.523729	0.0713655	1.07196e-06	0.0297956	2.63877	0.231734	0.00549396	0.00975836	0.38055	0.00449428	0.106408	0.184678	0.0211474	0.0696242	0.037832	0.00326612
22	0.0925776	0.00216334	0.0434931	0.00904286	0.264968	0.348237	0.104478	0.00504024	0.0448525	0.00218695	0.172764	0.279876	0.0740469	0.0163501	0.211787	0.211424	0.390972	0.177862	0.00391157	0.105776	0.231734	2.64574	0.0935071	0.055303	0.0645034	0.0197477	0.0451573	0.254006	0.023746	0.0722548	0.000634708	0.0244985
23	0.144412	0.591579	0.000326824	0.157036	0.0360455	0.310289	0.0758054	0.00630276	6.27876e-06	0.303792	0.0177248	0.0343649	0.00580419	0.249042	0.0901121	0.00690368	0.759228	0.0104767	0.0102545	0.015095	0.00549396	0.0935071	4.03281	0.00201644	0.0694956	0.311472	0.128098	0.0721508	0.0223081	0.016469	0.0440233	0.00843826
24	0.0421628	0.00359191	0.151064	0.075296	0.0764788	0.100392	0.00150913	0.00884253	0.0855839	0.0168436	0.000255056	0.0338621	0.000254568	0.0337429	0.132845	0.000990081	0.129626	0.0665434	3.77206e-05	0.108069	0.00975836	0.055303	0.00201644	0.326307	0.0475339	0.00980651	0.0254272	0.0123547	0.0307261	0.00133207	0.0495681	0.00512799
25	0.120769	0.042185	0.0229271	0.0539951	0.123265	0.087473	0.0168294	8.47355e-06	0.118035	0.0117186	0.0565916	0.0119595	0.350537	0.000662286	0.00252118	0.00193276	0.00326365	0.0598264	0.00616052	0.0679626	0.38055	0.0645034	0.0694956	0.0475339	0.292866	0.0036585	0.0374642	0.0492588	0.00031741	0.0302587	0.000448566	0.000411278
26	0.103496	0.0514326	0.124223	0.0314366	0.00357609	0.00614308	0.260661	0.040069	0.0629522	0.000717385	2.16439e-05	0.00296811	0.0307299	0.0830456	0.0594077	0.00649631	0.136907	0.0200523	0.161215	0.00238854	0.00449428	0.0197477	0.311472	0.00980651	0.0036585	0.573568	0.0531501	0.0621917	0.0258483	0.00104268	0.031231	0.016269
27	0.0139118	0.0427296	0.130721	0.00151635	8.37381e-05	0.137493	0.000175244	0.0189719	0.0408641	0.00157753	0.0351664	0.029884	0.193184	0.00156602	0.0427758	0.00533993	0.00766744	0.0219325	0.0163465	0.0190391	0.106408	0.0451573	0.128098	0.0254272	0.0374642	0.0531501	0.336674	0.00252125	0.00694632	0.0195973	0.015385	0.00320356
28	0.0121431	0.00398523	0.0394989	0.000243311	0.0228022	0.0714671	0.0228387	0.00391837	0.00256076	0.0127694	0.0256536	0.0259496	0.130045	0.00301759	0.184036	0.0134406	0.0228682	0.0336914	0.0271182	0.0745543	0.184678	0.254006	0.0721508	0.0123547	0.0492588	0.0621917	0.00252125	0.180343	0.0115099	0.0300983	0.0202047	0.0106874
29	0.000574856	0.00568076	0.0669678	0.0260154	0.0338637	0.00171704	0.000562134	0.0105725	0.00573305	0.0200996	0.00535711	0.00836734	0.00852445	0.0013313	0.0108027	0.000191061	0.008357	0.00626275	0.00199899	0.0533465	0.0211474	0.023746	0.0223081	0.0307261	0.00031741	0.0258483	0.00694632	0.0115099	0.0337869	8.69765e-06	0.0045826	0.000430563
30	0.0166484	0.00767213	0.00824919	0.0101698	0.0230875	0.00068843	0.000165503	0.00600478	0.0010437	2.18174e-05	0.0100923	0.00776563	0.0803363	0.00941367	0.0497564	0.00828266	0.000611628	0.0343981	0.00830953	0.0176249	0.0696242	0.0722548	0.016469	0.00133207	0.0302587	0.00104268	0.0195973	0.0300983	8.69765e-06	0.0190581	0.00513041	0.00373321
31	0.00811379	0.000591414	0.0482652	0.00247663	0.00363366	0.0158955	0.00186243	0.0090296	0.0479317	0.00553879	1.09332e-05	0.000168699	0.071442	0.0029797	0.102451	0.00293215	0.00400624	0.0393093	0.0602276	0.0185886	0.037832	0.000634708	0.0440233	0.0495681	0.000448566	0.031231	0.015385	0.0202047	0.0045826	0.00513041	0.0427713	0.0106812
32	0.00402971	0.000196	0.000199657	0.0025321	0.00593054	0.00672564	0.00188877	0.000744744	0.0363055	0.000995403	7.7841e-06	9.216e-05	0.0117831	3.10249e-05	0.0615189	0.00335125	0.00445156	0.0165972	0.0259178	0.00216876	0.00326612	0.0244985	0.00843826	0.00512799	0.000411278	0.016269	0.00320356	0.0106874	0.000430563	0.00373321	0.0106812	0.01
33-dimensional	118603	35712.8	1362.61	0.047175	0.0877602	0.286594	0.253664	0.103172	0.019999	0.00389827	0.0274033	0.192325	0.0860959	0.0356203	0.113419	0.0670175	0.101867	0.362768	0.0639773	0.30628	0.245471	0.0833645	0.0886814	0.0636465	0.133553	0.113846	0.0170878	0.0116045	0.00813662	0.0159818	0.0230137	0.00181922	0.00305698
2	35712.8	85991.1	18000	0.484676	0.00397944	0.148836	0.408308	0.00775483	0.293788	0.00317168	0.0922844	0.0588548	0.00460542	0.12887	0.654519	0.0357039	0.874667	0.351723	0.034384	0.00255747	0.108111	0.00674694	0.917173	0.0280864	0.0269853	0.0363967	0.0314789	0.00330178	0.0347685	0.00875632	0.0136893	0.00381452	0.0160757
3	1362.61	18000	41354.5	0.781192	0.103103	0.0789691	0.56454	0.0655212	0.0590621	0.0285133	0.455002	0.461949	0.905584	0.109544	0.250115	0.0268834	0.211372	0.527906	0.0381949	0.454992	0.0295531	0.0282057	0.0542723	0.261494	0.0109319	0.154835	0.107698	0.042108	0.310459	0.00953464	0.144973	0.00162434	0.0208803
4	0.047175	0.484676	0.781192	9.73512	0.178459	0.115286	0.0830182	0.259331	0.0359595	0.000622754	0.138863	0.00836405	2.08262	0.202147	0.0238191	0.000214931	0.0031557	0.263968	0.0947329	0.0635865	0.0214955	0.00879817	0.15165	0.0774596	0.0546921	0.0319026	0.00143455	0.000249782	0.0291771	0.010126	0.00199161	0.00270989	2.12521e-05
5	0.0877602	0.00397944	0.103103	0.178459	2.5633	7.62697e-05	0.0738835	0.131011	0.0347705	0.195024	0.0624965	0.0745384	0.680062	0.0791948	0.016309	0.0595966	0.00674292	0.303568	0.000321987	0.00452521	0.273186	0.294815	0.00164203	0.0365886	0.101458	0.000978507	0.000197295	0.024178	0.000545528	0.0245503	0.0296556	0.00153521	0.0100842
6	0.286594	0.148836	0.0789691	0.115286	7.62697e-05	8.48305	0.242972	0.020643	0.0784916	0.635761	0.000864421	0.487509	0.529169	0.00271172	0.151059	0.0915657	0.0775274	0.0216312	0.0221868	0.100655	0.116256	0.370192	0.211684	0.0683789	0.0754146	0.00358368	0.148887	0.0730337	0.0309975	0.000859365	0.00285333	0.0113565	0.00424974
7	0.253664	0.408308	0.56454	0.0830182	0.0738835	0.242972	4.30891	0.0172514	0.0112326	0.065509	0.0491962	0.208473	0.0160948	0.00417222	0.0179482	0.338525	0.00192779	0.0586756	0.00680718	0.168853	0.0329498	0.099418	0.0544717	0.00394285	0.0145403	0.268903	4.52092e-05	0.0232213	0.00671501	0.000201522	0.00556331	0.00107827	0.00079524
8	0.103172	0.00775483	0.0655212	0.259331	0.131011	0.020643	0.0172514	5.2007	0.00931645	0.011679	0.143129	0.345447	0.566471	0.397226	0.0316769	9.66632e-05	0.00192367	0.0538628	0.0634491	0.026048	0.0811212	0.00173424	0.0550923	2.8582e-05	0.000958658	0.0528247	0.0262008	0.00452469	0.101456	0.00526502	0.000457778	0.0044404	0.0109098
9	0.019999	0.293788	0.0590621	0.0359595	0.0347705	0.0784916	0.0112326	0.00931645	3.84374	0.00483652	0.290964	0.0380077	0.0282188	0.00850677	0.800775	0.162461	0.0230082	0.301079	0.417383	0.000395178	0.346793	0.0334473	0.0241613	0.1443	0.142064	0.0784612	0.0318239	0.00304714	0.0829969	0.0013809	0.111261	0.0230433	0.0105761
10	0.00389827	0.00317168	0.0285133	0.000622754	0.195024	0.635761	0.065509	0.011679	0.00483652	4.02482	0.395526	0.585496	0.171675	0.0430966	0.00301044	0.00248712	0.0888331	0.0176732	0.00665031	0.00282349	0.305324	0.00045876	0.17392	0.0425892	0.00624112	0.00274585	0.000356527	0.0136969	0.107614	1.70954e-07	0.030611	0.00429396	0.00813604
11	0.0274033	0.0922844	0.455002	0.138863	0.0624965	0.000864421	0.0491962	0.143129	0.290964	0.395526	2.85835	0.366975	0.219917	0.0854686	0.0905001	7.76663e-05	0.156259	0.172031	0.188678	0.0535585	0.814857	0.133822	0.0170531	0.0277389	0.087262	0.00302686	0.0522089	0.0231772	0.0858681	0.00848053	0.0377745	0.00409779	0.0314495
12	0.192325	0.0588548	0.461949	0.00836405	0.0745384	0.487509	0.208473	0.345447	0.0380077	0.585496	0.366975	6.71105	0.0317984	0.000687962	0.226159	0.416523	0.387111	0.718378	0.0247116	0.118727	0.0237237	0.281027	0.0322643	0.0326635	0.0116866	0.00308907	0.0295757	0.0260054	0.00989331	0.00779786	7.52539e-05	6.62949e-05	1.49769e-05
13	0.0860959	0.00460542	0.905584	2.08262	0.680062	0.529169	0.0160948	0.566471	0.0282188	0.171675	0.219917	0.0317984	10.3667	0.0963914	0.57335	0.410788	0.00746489	0.015623	0.00525481	0.206231	1.32056	0.0776703	0.00171166	1.5384e-05	0.341605	0.033105	0.188459	0.130801	0.0197886	0.0809639	0.0860714	0.00994636	0.000548028
14	0.0356203	0.12887	0.109544	0.202147	0.0791948	0.00271172	0.00417222	0.397226	0.00850677	0.0430966	0.0854686	0.000687962	0.0963914	0.919707	2.77841e-05	0.00829633	0.244522	0.0112004	0.0405007	0.159527	0.0371489	0.0163443	0.248923	0.033718	0.000663622	0.0830587	0.00156455	0.0030172	0.00134338	0.00941293	0.00296997	3.13615e-05	6.4e-09
15	0.113419	0.654519	0.250115	0.0238191	0.016309	0.151059	0.0179482	0.0316769	0.800775	0.00301044	0.0905001	0.226159	0.57335	2.77841e-05	4.96424	0.216454	0.0632432	0.21824	0.00264539	0.264621	0.231617	0.16185	0.36795	0.0359216	0.000275805	0.0343071	0.0647287	0.176218	0.103399	0.0455124	0.00817701	0.106045	0.0424525
16	0.0670175	0.0357039	0.0268834	0.000214931	0.0595966	0.0915657	0.338525	9.66632e-05	0.162461	0.00248712	7.76663e-05	0.416523	0.410788	0.00829633	0.216454	0.857364	0.050742	0.112258	0.0659887	0.165926	0.0385598	0.224241	0.0242621	0.0001006	0.00079043	0.00445164	0.00381749	0.0139518	0.0131662	0.00870784	0.0117983	0.00155872	0.00238828
17	0.101867	0.874667	0.211372	0.0031557	0.00674292	0.0775274	0.00192779	0.00192367	0.0230082	0.0888331	0.156259	0.387111	0.00746489	0.244522	0.0632432	0.050742	3.66383	0.348414	0.160503	0.301651	0.560878	0.397571	0.711539	0.118445	0.00399333	0.140865	0.0084426	0.0231217	0.00278776	0.000656065	0.00180216	0.00356119	0.00034969
18	0.362768	0.351723	0.527906	0.263968	0.303568	0.0216312	0.0586756	0.0538628	0.301079	0.0176732	0.172031	0.718378	0.015623	0.0112004	0.21824	0.112258	0.348414	6.19509	0.973795	0.0344727	0.0519142	0.184833	0.00348531	0.0543943	0.0552944	0.0224637	0.0199846	0.0341711	0.000360286	0.03491	0.0532382	0.0138902	0.000848557
19	0.0639773	0.034384	0.0381949	0.0947329	0.000321987	0.0221868	0.00680718	0.0634491	0.417383	0.00665031	0.188678	0.0247116	0.00525481	0.0405007	0.00264539	0.0659887	0.160503	0.973795	1.95926	0.166853	0.0245179	0.00909631	0.00525455	0.00866149	0.00164818	0.188963	0.0101734	0.0288656	0.0817939	0.00934538	0.141108	0.0136835	0.0136516
20	0.30628	0.00255747	0.454992	0.0635865	0.00452521	0.100655	0.168853	0.026048	0.000395178	0.00282349	0.0535585	0.118727	0.206231	0.159527	0.264621	0.165926	0.301651	0.0344727	0.166853	2.70911	0.0892812	0.123564	0.00026379	0.0621576	0.0846993	0.000497618	0.025469	0.0722885	0.00142878	0.0164721	0.00102914	0.000128448	0.00874973
21	0.245471	0.108111	0.0295531	0.0214955	0.273186	0.116256	0.0329498	0.0811212	0.346793	0.305324	0.814857	0.0237237	1.32056	0.0371489	0.231617	0.0385598	0.560878	0.0519142	0.0245179	0.0892812	3.26312	0.196675	0.0159993	0.000248352	0.43644	0.000825287	0.12771	0.179531	0.0177317	0.0663045	0.00194878	0.0116568	0.018198
22	0.0833645	0.00674694	0.0282057	0.00879817	0.294815	0.370192	0.099418	0.00173424	0.0334473	0.00045876	0.133822	0.281027	0.0776703	0.0163443	0.16185	0.224241	0.397571	0.184833	0.00909631	0.123564	0.196675	2.67149	0.0696969	0.0446503	0.0599576	0.0175684	0.0479582	0.255274	0.00922906	0.0729696	0.0031938	0.0212969	0.00078961
23	0.0886814	0.917173	0.0542723	0.15165	0.00164203	0.211684	0.0544717	0.0550923	0.0241613	0.17392	0.0170531	0.0322643	0.00171166	0.248923	0.36795	0.0242621	0.711539	0.00348531	0.00525455	0.00026379	0.0159993	0.0696969	4.96992	0.00662025	0.0463944	0.266115	0.104688	0.0686239	0.0248826	0.0183198	0.00194174	0.0218682	0.0221147
24	0.0636465	0.0280864	0.261494	0.0774596	0.0365886	0.0683789	0.00394285	2.8582e-05	0.1443	0.0425892	0.0277389	0.0326635	1.5384e-05	0.033718	0.0359216	0.0001006	0.118445	0.0543943	0.00866149	0.0621576	0.000248352	0.0446503	0.00662025	0.413874	0.0602992	0.015164	0.0195566	0.0132129	0.122946	0.00164068	0.100666	0.00157009	0.00720971
25	0.133553	0.0269853	0.0109319	0.0546921	0.101458	0.0754146	0.0145403	0.000958658	0.142064	0.00624112	0.087262	0.0116866	0.341605	0.000663622	0.000275805	0.00079043	0.00399333	0.0552944	0.00164818	0.0846993	0.43644	0.0599576	0.0463944	0.0602992	0.30436	0.00262917	0.0404203	0.0486174	0.00241623	0.0297285	0.00328625	6.5022e-05	0.0010517
26	0.113846	0.0363967	0.154835	0.0319026	0.000978507	0.00358368	0.268903	0.0528247	0.0784612	0.00274585	0.00302686	0.00308907	0.033105	0.0830587	0.0343071	0.00445164	0.140865	0.0224637	0.188963	0.000497618	0.000825287	0.0175684	0.266115	0.015164	0.00262917	0.585849	0.0501683	0.0628265	0.0481465	0.00113105	0.0434212	0.0136543	0.00080656
27	0.0170878	0.0314789	0.107698	0.00143455	0.000197295	0.148887	4.52092e-05	0.0262008	0.0318239	0.000356527	0.0522089	0.0295757	0.188459	0.00156455	0.0647287	0.00381749	0.0084426	0.0199846	0.0101734	0.025469	0.12771	0.0479582	0.104688	0.0195566	0.0404203	0.0501683	0.342894	0.00241862	0.00127027	0.0192932	0.0096607	0.00426432	0.00053361
28	0.0116045	0.00330178	0.042108	0.000249782	0.024178	0.0730337	0.0232213	0.00452469	0.00304714	0.0136969	0.0231772	0.0260054	0.130801	0.0030172	0.176218	0.0139518	0.0231217	0.0341711	0.0288656	0.0722885	0.179531	0.255274	0.0686239	0.0132129	0.0486174	0.0628265	0.00241862	0.180513	0.0135758	0.0301716	0.0216459	0.0103421	1.99809e-05
29	0.00813662	0.0347685	0.310459	0.0291771	0.000545528	0.0309975	0.00671501	0.101456	0.0829969	0.107614	0.0858681	0.00989331	0.0197886	0.00134338	0.103399	0.0131662	0.00278776	0.000360286	0.0817939	0.00142878	0.0177317	0.00922906	0.0248826	0.122946	0.00241623	0.0481465	0.00127027	0.0135758	0.372437	4.62141e-05	0.0887271	0.00971059	0.0426464
30	0.0159818	0.00875632	0.00953464	0.010126	0.0245503	0.000859365	0.000201522	0.00526502	0.0013809	1.70954e-07	0.00848053	0.00779786	0.0809639	0.00941293	0.0455124	0.00870784	0.000656065	0.03491	0.00934538	0.0164721	0.0663045	0.0729696	0.0183198	0.00164068	0.0297285	0.00113105	0.0192932	0.0301716	4.62141e-05	0.0191197	0.00591173	0.0035191	2.22784e-05
31	0.0230137	0.0136893	0.144973	0.00199161	0.0296556	0.00285333	0.00556331	0.000457778	0.111261	0.030611	0.0377745	7.52539e-05	0.0860714	0.00296997	0.00817701	0.0117983	0.00180216	0.0532382	0.141108	0.00102914	0.00194878	0.0031938	0.00194174	0.100666	0.00328625	0.0434212	0.0096607	0.0216459	0.0887271	0.00591173	0.109591	0.00376542	0.0124233
32	0.00181922	0.00381452	0.00162434	0.00270989	0.00153521	0.0113565	0.00107827	0.0044404	0.0230433	0.00429396	0.00409779	6.62949e-05	0.00994636	3.13615e-05	0.106045	0.00155872	0.00356119	0.0138902	0.0136835	0.000128448	0.0116568	0.0212969	0.0218682	0.00157009	6.5022e-05	0.0136543	0.00426432	0.0103421	0.00971059	0.0035191	0.00376542	0.0130394	0.00141903
33	0.00305698	0.0160757	0.0208803	2.12521e-05	0.0100842	0.00424974	0.00079524	0.0109098	0.0105761	0.00813604	0.0314495	1.49769e-05	0.000548028	6.4e-09	0.0424525	0.00238828	0.00034969	0.000848557	0.0136516	0.00874973	0.018198	0.00078961	0.0221147	0.00720971	0.0010517	0.00080656	0.00053361	1.99809e-05	0.0426464	2.22784e-05	0.0124233	0.00141903	0.01
34-dimensional	118640	35728.9	1360.42	0.0241074	0.208717	0.254386	0.299593	0.0792277	0.0176847	0.000322328	0.00159171	0.14178	0.121666	0.0212118	0.202084	0.0710639	0.0752307	0.440581	0.0296801	0.533322	0.143594	0.103357	0.0981689	0.0326409	0.112348	0.0579319	0.0120662	0.022732	0.00656219	0.00381757	0.165533	0.00296126	0.00834176	0.00526786
2	35728.9	86011.2	17993.6	0.417553	0.0371559	0.130164	0.364462	0.00313419	0.301216	0.014695	0.0409419	0.0856545	0.000535717	0.155059	0.515499	0.0380922	0.808198	0.295327	0.0144738	0.00850546	0.0550993	0.0117922	0.941338	0.0508099	0.019554	0.0126988	0.0257826	0.000515539	0.0375925	0.00171329	0.00792228	0.00507811	0.00954319	0.00343396
3	1360.42	17993.6	41361.4	0.720631	0.0531099	0.0694495	0.528089	0.0775024	0.0613981	0.0458929	0.364372	0.510745	0.847072	0.126233	0.190514	0.0283274	0.188723	0.478707	0.0580588	0.599606	0.0112693	0.0223371	0.0584313	0.304461	0.00765194	0.20077	0.100105	0.0526683	0.316269	0.00374184	0.0560544	0.00220362	0.0154155	0.00167772
4	0.0241074	0.417553	0.720631	10.1948	0.0545769	0.141343	0.115264	0.213939	0.0398183	0.0142723	0.270772	0.000344074	2.2748	0.159159	0.000473745	0.000562355	0.0118687	0.19494	0.0453519	0.00195642	0.0804253	0.00305594	0.137767	0.131414	0.0726012	0.0854532	0.000177809	0.00441078	0.0329874	0.0311926	0.118753	0.0043413	0.00142619	0.00728121
5	0.208717	0.0371559	0.0531099	0.0545769	4.37113	0.00734677	0.164069	0.233374	0.0450214	0.471578	0.0177109	0.00704712	0.430064	0.1704	0.222315	0.0486843	0.0479439	0.545173	0.0519729	0.222755	0.0280344	0.413268	4.64033e-05	0.000732534	0.0511876	0.0694902	0.00603561	0.0822198	0.00264134	0.00163	0.366917	1.09606e-05	8.97304e-05	0.0489693
6	0.254386	0.130164	0.0694495	0.141343	0.00734677	8.58949	0.218299	0.0279023	0.0812951	0.713381	0.0106677	0.437916	0.482845	0.00599282	0.103913	0.0888457	0.0929218	0.0335685	0.0385661	0.0454792	0.0742287	0.394007	0.203367	0.0481281	0.0659564	8.93082e-06	0.158511	0.0873562	0.0329309	7.55442e-05	0.0413952	0.012879	0.00193557	0.00182158
7	0.299593	0.364462	0.528089	0.115264	0.164069	0.218299	4.46073	0.0269956	0.00979853	0.0358188	0.0138233	0.164143	0.0298638	0.010068	0.0517623	0.331132	0.00658377	0.0859758	0.00024318	0.0698001	0.0072022	0.117296	0.0606492	1.14442e-05	0.0212258	0.192126	0.00057793	0.013613	0.00552295	0.00459858	0.0819424	0.00181451	0.00337564	0.00362524
8	0.0792277	0.00313419	0.0775024	0.213939	0.233374	0.0279023	0.0269956	5.33827	0.008129	0.00225049	0.0804081	0.402612	0.505337	0.439248	0.0691817	1.61912e-05	0.00603899	0.0344956	0.0365034	0.0868979	0.0387869	0.00440283	0.0497329	0.00352339	6.61883e-05	0.0246144	0.021352	0.00121101	0.0970863	0.000567131	0.0457251	0.00333656	0.0173275	0.00299647
9	0.0176847	0.301216	0.0613981	0.0398183	0.0450214	0.0812951	0.00979853	0.008129	3.84904	0.0067923	0.269667	0.0419774	0.0312765	0.00982694	0.768791	0.163456	0.0208799	0.290377	0.400865	7.11749e-05	0.325171	0.0353934	0.0233948	0.135721	0.138434	0.0700261	0.0330275	0.00233377	0.0821508	0.00225701	0.140182	0.0236187	0.0117962	0.000135024
10	0.000322328	0.014695	0.0458929	0.0142723	0.471578	0.713381	0.0358188	0.00225049	0.0067923	4.5321	0.191119	0.449629	0.108779	0.0201183	0.0515037	0.00379736	0.0526954	0.00153264	0.00172542	0.0469864	0.140444	0.000816724	0.154721	0.0996403	0.00107675	0.0399999	0.00016829	0.0333886	0.117018	0.00980996	0.0459746	0.00696933	0.0012388	0.0122678
11	0.00159171	0.0409419	0.364372	0.270772	0.0177109	0.0106677	0.0138233	0.0804081	0.269667	0.191119	3.96144	0.568048	0.361265	0.0359386	0.00101689	9.12813e-05	0.252353	0.31512	0.392814	0.0362549	1.39379	0.0827567	0.0280951	0.11381	0.135121	0.0816263	0.0774392	0.00245708	0.0992033	0.0606362	0.171571	0.00847783	0.00834913	0.0299671
12	0.14178	0.0856545	0.510745	0.000344074	0.00704712	0.437916	0.164143	0.402612	0.0419774	0.449629	0.568048	7.0946	0.0593022	0.000600088	0.117527	0.428306	0.324155	0.600968	0.00387503	0.305552	0.0847868	0.241624	0.0391637	0.0702431	0.0206591	0.00339632	0.0386313	0.0122296	0.00785702	0.027024	0.0850827	0.000483648	0.00214364	0.00729999
13	0.121666	0.000535717	0.847072	2.2748	0.430064	0.482845	0.0298638	0.505337	0.0312765	0.108779	0.361265	0.0593022	10.7451	0.0703121	0.407865	0.421232	0.0178462	0.00364486	0.000151615	0.0719177	1.61712	0.0596569	0.0033287	0.00509408	0.379814	0.0064412	0.207996	0.100112	0.0171619	0.124253	0.315447	0.0125667	0.00375837	0.00582322
14	0.0212118	0.155059	0.126233	0.159159	0.1704	0.00599282	0.010068	0.439248	0.00982694	0.0201183	0.0359386	0.000600088	0.0703121	0.988556	0.00756311	0.00718851	0.20956	0.0243692	0.0182979	0.296024	0.00949335	0.0239149	0.261756	0.0586632	1.00717e-06	0.0437155	0.00320687	0.00812547	0.000848558	0.00194934	0.0237831	1.61905e-05	0.000873979	0.0035248
15	0.202084	0.515499	0.190514	0.000473745	0.222315	0.103913	0.0517623	0.0691817	0.768791	0.0515037	0.00101689	0.117527	0.407865	0.00756311	6.09806	0.201387	0.120796	0.358466	0.050214	0.797438	0.0537622	0.223196	0.328739	0.117528	0.0023211	0.153864	0.0439895	0.26207	0.0911272	0.00562325	0.2077	0.0902771	0.0801976	0.0241367
16	0.0710639	0.0380922	0.0283274	0.000562355	0.0486843	0.0888457	0.331132	1.61912e-05	0.163456	0.00379736	9.12813e-05	0.428306	0.421232	0.00718851	0.201387	0.85945	0.047829	0.106318	0.06007	0.187657	0.0455391	0.219728	0.0235602	1.92649e-07	0.00105878	0.00653826	0.00420388	0.0125049	0.0128595	0.0105604	0.0212924	0.00169749	0.00293102	0.000112572
17	0.0752307	0.808198	0.188723	0.0118687	0.0479439	0.0929218	0.00658377	0.00603899	0.0208799	0.0526954	0.252353	0.324155	0.0178462	0.20956	0.120796	0.047829	3.81169	0.412976	0.220291	0.158831	0.719425	0.433553	0.689399	0.0801688	0.00791745	0.209515	0.0120272	0.0356211	0.00202177	0.000867583	0.0675222	0.00246527	0.000144234	0.00382419
18	0.440581	0.295327	0.478707	0.19494	0.545173	0.0335685	0.0859758	0.0344956	0.290377	0.00153264	0.31512	0.600968	0.00364486	0.0243692	0.358466	0.106318	0.412976	6.55719	1.16838	0.000427657	0.00844746	0.219161	0.00167473	0.0224017	0.0399344	0.0690236	0.0136921	0.0552616	6.80996e-05	0.0124177	0.00448343	0.0108431	0.00016698	0.0071707
19	0.0296801	0.0144738	0.0580588	0.0453519	0.0519729	0.0385661	0.00024318	0.0365034	0.400865	0.00172542	0.392814	0.00387503	0.000151615	0.0182979	0.050214	0.06007	0.220291	1.16838	2.32024	0.0189544	0.112211	0.0211815	0.0092658	0.041095	3.2987e-05	0.339645	0.00474752	0.0556064	0.0900459	5.24311e-06	0.000226036	0.00979352	0.00380107	0.0123499
20	0.533322	0.00850546	0.599606	0.00195642	0.222755	0.0454792	0.0698001	0.0868979	7.11749e-05	0.0469864	0.0362549	0.305552	0.0719177	0.296024	0.797438	0.187657	0.158831	0.000427657	0.0189544	5.01643	0.00853405	0.0583319	0.00128749	0.239858	0.0358787	0.120434	0.00801164	0.170893	0.00471605	0.00785942	0.679927	0.0025841	0.0460323	0.0593799
21	0.143594	0.0550993	0.0112693	0.0804253	0.0280344	0.0742287	0.0072022	0.0387869	0.325171	0.140444	1.39379	0.0847868	1.61712	0.00949335	0.0537622	0.0455391	0.719425	0.00844746	0.112211	0.00853405	4.26055	0.137654	0.025865	0.0303297	0.529368	0.034297	0.162839	0.107913	0.0235621	0.160359	0.370258	0.017953	0.00304492	0.0257699
22	0.103357	0.0117922	0.0223371	0.00305594	0.413268	0.394007	0.117296	0.00440283	0.0353934	0.000816724	0.0827567	0.241624	0.0596569	0.0239149	0.223196	0.219728	0.433553	0.219161	0.0211815	0.0583319	0.137654	2.73851	0.064692	0.0278111	0.0510936	0.00524066	0.0538128	0.283044	0.0081629	0.0528686	0.0104399	0.0192148	3.23019e-05	0.00203762
23	0.0981689	0.941338	0.0584313	0.137767	4.64033e-05	0.203367	0.0606492	0.0497329	0.0233948	0.154721	0.0280951	0.0391637	0.0033287	0.261756	0.328739	0.0235602	0.689399	0.00167473	0.0092658	0.00128749	0.025865	0.064692	4.99034	0.0105002	0.0426315	0.237518	0.100745	0.0621382	0.0257449	0.0135264	0.0142234	0.0229057	0.0190682	0.000457532
24	0.0326409	0.0508099	0.304461	0.131414	0.000732534	0.0481281	1.14442e-05	0.00352339	0.135721	0.0996403	0.11381	0.0702431	0.00509408	0.0586632	0.117528	1.92649e-07	0.0801688	0.0224017	0.041095	0.239858	0.0303297	0.0278111	0.0105002	0.548618	0.0821994	0.0648364	0.012425	0.0300913	0.131869	0.002243	0.00087585	0.000558377	0.00128956	0.00973577
25	0.112348	0.019554	0.00765194	0.0726012	0.0511876	0.0659564	0.0212258	6.61883e-05	0.138434	0.00107675	0.135121	0.0206591	0.379814	1.00717e-06	0.0023211	0.00105878	0.00791745	0.0399344	3.2987e-05	0.0358787	0.529368	0.0510936	0.0426315	0.0821994	0.323849	1.84382e-05	0.0453864	0.0383225	0.00296356	0.0439126	0.00796922	1.70054e-06	0.0001374	0.00173889
26	0.0579319	0.0126988	0.20077	0.0854532	0.0694902	8.93082e-06	0.192126	0.0246144	0.0700261	0.0399999	0.0816263	0.00339632	0.0064412	0.0437155	0.153864	0.00653826	0.209515	0.0690236	0.339645	0.120434	0.034297	0.00524066	0.237518	0.0648364	1.84382e-05	0.889231	0.0344686	0.108695	0.055841	0.00723129	0.067651	0.00907261	0.0014271	0.0177582
27	0.0120662	0.0257826	0.100105	0.000177809	0.00603561	0.158511	0.00057793	0.021352	0.0330275	0.00016829	0.0774392	0.0386313	0.207996	0.00320687	0.0439895	0.00420388	0.0120272	0.0136921	0.00474752	0.00801164	0.162839	0.0538128	0.100745	0.012425	0.0453864	0.0344686	0.35265	0.00103182	0.0010238	0.0270638	0.0397582	0.00489493	7.77533e-05	0.000827138
28	0.022732	0.000515539	0.0526683	0.00441078	0.0822198	0.0873562	0.013613	0.00121101	0.00233377	0.0333886	0.00245708	0.0122296	0.100112	0.00812547	0.26207	0.0125049	0.0356211	0.0552616	0.0556064	0.170893	0.107913	0.283044	0.0621382	0.0300913	0.0383225	0.108695	0.00103182	0.211641	0.0153834	0.014613	0.00376736	0.00847909	0.000624168	0.00351768
29	0.00656219	0.0375925	0.316269	0.0329874	0.00264134	0.0329309	0.00552295	0.0970863	0.0821508	0.117018	0.0992033	0.00785702	0.0171619	0.000848558	0.0911272	0.0128595	0.00202177	6.80996e-05	0.0900459	0.00471605	0.0235621	0.0081629	0.0257449	0.131869	0.00296356	0.055841	0.0010238	0.0153834	0.374399	2.01111e-05	0.0641759	0.0101196	0.0400873	0.000160529
30	0.00381757	0.00171329	0.00374184	0.0311926	0.00163	7.55442e-05	0.00459858	0.000567131	0.00225701	0.00980996	0.0606362	0.027024	0.124253	0.00194934	0.00562325	0.0105604	0.000867583	0.0124177	5.24311e-06	0.00785942	0.160359	0.0528686	0.0135264	0.002243	0.0439126	0.00723129	0.0270638	0.014613	2.01111e-05	0.047338	0.152056	0.00544009	0.00239534	0.0079299
31	0.165533	0.00792228	0.0560544	0.118753	0.366917	0.0413952	0.0819424	0.0457251	0.140182	0.0459746	0.171571	0.0850827	0.315447	0.0237831	0.2077	0.0212924	0.0675222	0.00448343	0.000226036	0.679927	0.370258	0.0104399	0.0142234	0.00087585	0.00796922	0.067651	0.0397582	0.00376736	0.0641759	0.152056	2.45524	0.0140066	0.0818187	0.123587
32	0.00296126	0.00507811	0.00220362	0.0043413	1.09606e-05	0.012879	0.00181451	0.00333656	0.0236187	0.00696933	0.00847783	0.000483648	0.0125667	1.61905e-05	0.0902771	0.00169749	0.00246527	0.0108431	0.00979352	0.0025841	0.017953	0.0192148	0.0229057	0.000558377	1.70054e-06	0.00907261	0.00489493	0.00847909	0.0101196	0.00544009	0.0140066	0.0136464	0.000877351	0.000262764
33	0.00834176	0.00954319	0.0154155	0.00142619	8.97304e-05	0.00193557	0.00337564	0.0173275	0.0117962	0.0012388	0.00834913	0.00214364	0.00375837	0.000873979	0.0801976	0.00293102	0.000144234	0.00016698	0.00380107	0.0460323	0.00304492	3.23019e-05	0.0190682	0.00128956	0.0001374	0.0014271	7.77533e-05	0.000624168	0.0400873	0.00239534	0.0818187	0.000877351	0.0155404	0.00246612
34	0.00526786	0.00343396	0.00167772	0.00728121	0.0489693	0.00182158	0.00362524	0.00299647	0.000135024	0.0122678	0.0299671	0.00729999	0.00582322	0.0035248	0.0241367	0.000112572	0.00382419	0.0071707	0.0123499	0.0593799	0.0257699	0.00203762	0.000457532	0.00973577	0.00173889	0.0177582	0.000827138	0.00351768	0.000160529	0.0079299	0.123587	0.000262764	0.00246612	0.01
35-dimensional	118787	35639.8	1351.66	0.0138592	0.0946357	0.172189	0.404127	0.0571991	0.0323723	0.0101465	0.0114673	0.0235823	0.293409	0.161302	0.0448062	0.00166072	0.0427123	0.937217	0.0158385	0.637439	0.114747	0.0627901	0.00649086	0.0674959	0.104919	0.208599	0.0538126	0.024637	0.0062606	0.000790672	0.0764895	0.0048038	0.0269095	0.0010437	0.021316
2	35639.8	86164.1	18028.9	0.898787	0.127997	0.211276	0.491977	0.0105615	0.360882	0.0637348	0.0163959	0.00212676	0.0558887	0.458097	0.206993	0.286229	0.94821	0.774333	0.029462	0.00028606	0.0779397	0.0349702	1.50699	0.0979133	0.0231949	0.0159249	0.000651524	0.000873234	0.0367893	0.0061811	0.0543245	0.00300238	0.0317148	0.0304777	0.0260629
3	1351.66	18028.9	41388.3	0.485258	0.0984114	0.0456475	0.458875	0.0912021	0.0491067	0.0219086	0.411029	0.704013	0.660595	0.0451505	0.323963	9.8893e-06	0.157373	0.272593	0.0712117	0.659894	0.00701137	0.0357272	0.0125167	0.257693	0.0065914	0.107291	0.147861	0.0542653	0.317452	0.00179676	0.0957557	0.00305264	0.00698849	0.000308132	0.0066341
4	0.0138592	0.898787	0.485258	12.5496	0.180395	0.240554	0.204907	0.166749	0.019441	0.00105817	0.188625	0.0712925	3.08088	0.528208	0.106533	0.13681	0.0382336	0.00267918	0.0235623	0.00184855	0.112271	0.0213443	0.447901	0.0682085	0.0805884	0.000244905	0.0288128	0.00552668	0.0338694	0.0482821	0.031593	0.00721829	0.0171298	0.00240065	0.0349615
5	0.0946357	0.127997	0.0984114	0.180395	4.81887	0.00053453	0.117784	0.205633	0.0600461	0.592595	0.0324429	0.0576203	0.625384	0.350464	0.407074	3.01748e-05	0.029456	0.275942	0.0382096	0.180021	0.0382488	0.479559	0.0288168	0.00680018	0.0548203	0.172101	0.0266303	0.0797533	0.00250755	0.000282363	0.485738	0.00018868	0.00171628	0.0868585	0.0104469
6	0.172189	0.211276	0.0456475	0.240554	0.00053453	8.81072	0.185039	0.0341463	0.0704554	0.631766	0.00564027	0.322882	0.376962	0.00089753	0.178191	0.182312	0.111016	0.0966413	0.0465942	0.0341105	0.0653262	0.357551	0.300952	0.0637932	0.0635504	0.00876195	0.120344	0.0888979	0.0332182	0.000520459	0.0221437	0.0143357	0.000182185	1.72874e-06	0.00375034
7	0.404127	0.491977	0.458875	0.204907	0.117784	0.185039	4.61678	0.0330666	0.0140291	0.0568609	0.0211481	0.0977931	0.0638867	3.32966e-05	0.0166188	0.493977	0.0119175	0.175871	1.33307e-05	0.0556793	0.00465187	0.0980256	0.0224369	0.00130934	0.022609	0.278651	0.000706752	0.0130208	0.00540752	0.00668613	0.0539391	0.00237853	0.00778616	0.000279974	0.00366267
8	0.0571991	0.0105615	0.0912021	0.166749	0.205633	0.0341463	0.0330666	5.37715	0.00989588	0.0050406	0.0881495	0.460736	0.452374	0.374479	0.0465739	0.00422848	0.00830496	0.0157054	0.0330668	0.0950511	0.035708	0.00273301	0.0724733	0.00190541	3.47907e-05	0.0399086	0.0290243	0.001127	0.0968534	0.000293496	0.0353337	0.00300381	0.0213353	0.00115062	0.00083984
9	0.0323723	0.360882	0.0491067	0.019441	0.0600461	0.0704554	0.0140291	0.00989588	3.8897	0.0117831	0.25452	0.0242688	0.0180584	0.0241801	0.679683	0.222758	0.0254043	0.367095	0.413915	4.30527e-05	0.335344	0.0415127	0.0103429	0.123185	0.140288	0.0471116	0.0435257	0.00246733	0.0823887	0.00160755	0.162489	0.0226215	0.00857472	0.00120524	0.00103362
10	0.0101465	0.0637348	0.0219086	0.00105817	0.592595	0.631766	0.0568609	0.0050406	0.0117831	4.81782	0.15981	0.631532	0.191144	4.71571e-07	0.129155	0.054167	0.0713959	0.0435131	0.000246112	0.0319843	0.157718	0.00463229	0.0695657	0.129397	0.00152799	0.102582	0.00655642	0.0321409	0.116301	0.00644805	0.082346	0.00565368	0.00572731	0.0286147	0.00660806
11	0.0114673	0.0163959	0.411029	0.188625	0.0324429	0.00564027	0.0211481	0.0881495	0.25452	0.15981	4.0462	0.467046	0.291882	0.0118566	0.0018565	0.0113265	0.231396	0.216622	0.374684	0.0285404	1.36403	0.0703962	0.0580718	0.131262	0.132522	0.125174	0.100346	0.00265433	0.0988297	0.0555224	0.20728	0.00763545	0.0130626	0.0425064	0.00211784
12	0.0235823	0.00212676	0.704013	0.0712925	0.0576203	0.322882	0.0977931	0.460736	0.0242688	0.631532	0.467046	8.39147	0.19826	0.059179	0.35003	0.110873	0.248624	0.208736	0.000187272	0.38939	0.111039	0.320049	0.00207644	0.0332187	0.0241874	0.0281239	0.00473319	0.0108393	0.00751165	0.039843	0.0241498	0.00141146	0.0149705	0.000589229	0.0233234
13	0.293409	0.0558887	0.660595	3.08088	0.625384	0.376962	0.0638867	0.452374	0.0180584	0.191144	0.291882	0.19826	11.9196	0.246786	0.729078	0.137606	0.0379335	0.0462206	0.00295077	0.042663	1.71093	0.0951158	0.0233781	5.07894e-08	0.392488	0.0760245	0.119415	0.0965989	0.0167183	0.146657	0.196924	0.0157692	0.0161522	0.000345612	0.0174504
14	0.161302	0.458097	0.0451505	0.528208	0.350464	0.00089753	3.32966e-05	0.374479	0.0241801	4.71571e-07	0.0118566	0.059179	0.246786	1.69434	0.138841	0.0808177	0.290492	0.0438354	0.0364905	0.213711	0.0212291	0.0575051	0.62589	0.113727	0.000211384	0.00253545	0.041328	0.00684051	0.000985444	0.00715418	0.0965235	0.000192097	0.0033352	0.0343461	0.0307406
15	0.0448062	0.206993	0.323963	0.106533	0.407074	0.178191	0.0166188	0.0465739	0.679683	0.129155	0.0018565	0.35003	0.729078	0.138841	7.47943	0.0111969	0.0740429	0.0671399	0.0296791	0.667476	0.0765732	0.304225	0.098364	0.18587	0.00126738	0.401103	0.00539552	0.255045	0.0924005	0.0126692	0.361359	0.100539	0.0408273	0.0742027	0.0265429
16	0.00166072	0.286229	9.8893e-06	0.13681	3.01748e-05	0.182312	0.493977	0.00422848	0.222758	0.054167	0.0113265	0.110873	0.137606	0.0808177	0.0111969	1.87736	0.0999705	0.584999	0.0973632	0.112222	0.0241641	0.134331	0.0331552	0.0131171	0.000265311	0.153928	0.0580427	0.0145806	0.0134827	0.0029401	0.111402	0.000389255	0.00256948	0.02619	0.0443103
17	0.0427123	0.94821	0.157373	0.0382336	0.029456	0.111016	0.0119175	0.00830496	0.0254043	0.0713959	0.231396	0.248624	0.0379335	0.290492	0.0740429	0.0999705	3.89589	0.546365	0.234331	0.142078	0.741215	0.404438	0.817447	0.0950125	0.00856646	0.151479	0.00503114	0.0363661	0.00196841	0.00161073	0.0477524	0.00201851	0.00123005	0.000816296	0.00214462
18	0.937217	0.774333	0.272593	0.00267918	0.275942	0.0966413	0.175871	0.0157054	0.367095	0.0435131	0.216622	0.208736	0.0462206	0.0438354	0.0671399	0.584999	0.546365	8.97132	1.31607	0.0139055	0.00119189	0.134617	0.139304	0.068986	0.0337617	0.00209031	0.0849032	0.0594951	3.09497e-05	0.00401527	0.0141758	0.00686714	0.0136259	0.00423417	0.0434514
19	0.0158385	0.029462	0.0712117	0.0235623	0.0382096	0.0465942	1.33307e-05	0.0330668	0.413915	0.000246112	0.374684	0.000187272	0.00295077	0.0364905	0.0296791	0.0973632	0.234331	1.31607	2.35115	0.0150897	0.118153	0.0169243	0.00207603	0.0344041	6.72136e-05	0.287013	0.00912081	0.0562441	0.0902923	9.25995e-05	0.000178058	0.00916205	0.00209915	0.00779422	0.00101124
20	0.637439	0.00028606	0.659894	0.00184855	0.180021	0.0341105	0.0556793	0.0950511	4.30527e-05	0.0319843	0.0285404	0.38939	0.042663	0.213711	0.667476	0.112222	0.142078	0.0139055	0.0150897	5.11438	0.0110718	0.06979	0.00148132	0.215731	0.0345274	0.0772881	0.0165201	0.172532	0.00479907	0.00988251	0.613005	0.0030905	0.0565408	0.04417	0.00217622
21	0.114747	0.0779397	0.00701137	0.112271	0.0382488	0.0653262	0.00465187	0.035708	0.335344	0.157718	1.36403	0.111039	1.71093	0.0212291	0.0765732	0.0241641	0.741215	0.00119189	0.118153	0.0110718	4.29189	0.147755	0.0136744	0.0253551	0.532465	0.0208682	0.144784	0.107147	0.0236713	0.165484	0.340963	0.0187134	0.00171983	0.0198113	0.000757901
22	0.0627901	0.0349702	0.0357272	0.0213443	0.479559	0.357551	0.0980256	0.00273301	0.0415127	0.00463229	0.0703962	0.320049	0.0951158	0.0575051	0.304225	0.134331	0.404438	0.134617	0.0169243	0.06979	0.147755	2.81715	0.0312993	0.0197238	0.0528028	2.73921e-07	0.0743133	0.280857	0.00827651	0.0581446	0.021176	0.0206128	0.000892297	0.00640523	0.00235904
23	0.00649086	1.50699	0.0125167	0.447901	0.0288168	0.300952	0.0224369	0.0724733	0.0103429	0.0695657	0.0580718	0.00207644	0.0233781	0.62589	0.098364	0.0331552	0.817447	0.139304	0.00207603	0.00148132	0.0136744	0.0312993	6.19042	0.0356742	0.0478652	0.0632346	0.0338739	0.0655538	0.0250892	0.023429	0.0683969	0.0182481	0.0472971	0.0184735	0.0254147
24	0.0674959	0.0979133	0.257693	0.0682085	0.00680018	0.0637932	0.00130934	0.00190541	0.123185	0.129397	0.131262	0.0332187	5.07894e-08	0.113727	0.18587	0.0131171	0.0950125	0.068986	0.0344041	0.215731	0.0253551	0.0197238	0.0356742	0.592999	0.0798176	0.112111	0.00437305	0.0292993	0.131362	0.00121535	0.00607821	0.000850212	0.00395667	0.0189358	0.00293764
25	0.104919	0.0231949	0.0065914	0.0805884	0.0548203	0.0635504	0.022609	3.47907e-05	0.140288	0.00152799	0.132522	0.0241874	0.392488	0.000211384	0.00126738	0.000265311	0.00856646	0.0337617	6.72136e-05	0.0345274	0.532465	0.0528028	0.0478652	0.0798176	0.324527	5.08271e-05	0.0426766	0.0381944	0.00297441	0.0446619	0.00678666	2.66885e-07	6.20506e-05	0.00130711	5.95984e-05
26	0.208599	0.0159249	0.107291	0.000244905	0.172101	0.00876195	0.278651	0.0399086	0.0471116	0.102582	0.125174	0.0281239	0.0760245	0.00253545	0.401103	0.153928	0.151479	0.00209031	0.287013	0.0772881	0.0208682	2.73921e-07	0.0632346	0.112111	5.08271e-05	1.35011	0.00382917	0.104597	0.0549425	0.00259235	0.153779	0.0121756	0.00128968	0.0573898	0.0218951
27	0.0538126	0.000651524	0.147861	0.0288128	0.0266303	0.120344	0.000706752	0.0290243	0.0435257	0.00655642	0.100346	0.00473319	0.119415	0.041328	0.00539552	0.0580427	0.00503114	0.0849032	0.00912081	0.0165201	0.144784	0.0743133	0.0338739	0.00437305	0.0426766	0.00382917	0.440652	0.00127225	0.00109402	0.0210892	0.0751	0.00377383	0.00254777	0.00789506	0.00699732
28	0.024637	0.000873234	0.0542653	0.00552668	0.0797533	0.0888979	0.0130208	0.001127	0.00246733	0.0321409	0.00265433	0.0108393	0.0965989	0.00684051	0.255045	0.0145806	0.0363661	0.0594951	0.0562441	0.172532	0.107147	0.280857	0.0655538	0.0292993	0.0381944	0.104597	0.00127225	0.211807	0.0153969	0.0143775	0.00331719	0.00839963	0.000734132	0.00316564	1.79776e-05
29	0.0062606	0.0367893	0.317452	0.0338694	0.00250755	0.0332182	0.00540752	0.0968534	0.0823887	0.116301	0.0988297	0.00751165	0.0167183	0.000985444	0.0924005	0.0134827	0.00196841	3.09497e-05	0.0902923	0.00479907	0.0236713	0.00827651	0.0250892	0.131362	0.00297441	0.0549425	0.00109402	0.0153969	0.374419	2.28677e-05	0.0647604	0.0101461	0.0398304	0.000137904	1.6641e-06
30	0.000790672	0.0061811	0.00179676	0.0482821	0.000282363	0.000520459	0.00668613	0.000293496	0.00160755	0.00644805	0.0555224	0.039843	0.146657	0.00715418	0.0126692	0.0029401	0.00161073	0.00401527	9.25995e-05	0.00988251	0.165484	0.0581446	0.023429	0.00121535	0.0446619	0.00259235	0.0210892	0.0143775	2.28677e-05	0.0496802	0.13643	0.0057926	0.00365131	0.00525389	0.000531764
31	0.0764895	0.0543245	0.0957557	0.031593	0.485738	0.0221437	0.0539391	0.0353337	0.162489	0.082346	0.20728	0.0241498	0.196924	0.0965235	0.361359	0.111402	0.0477524	0.0141758	0.000178058	0.613005	0.340963	0.021176	0.0683969	0.00607821	0.00678666	0.153779	0.0751	0.00331719	0.0647604	0.13643	2.71115	0.0119349	0.0583697	0.172773	0.00796378
32	0.0048038	0.00300238	0.00305264	0.00721829	0.00018868	0.0143357	0.00237853	0.00300381	0.0226215	0.00565368	0.00763545	0.00141146	0.0157692	0.000192097	0.100539	0.000389255	0.00201851	0.00686714	0.00916205	0.0030905	0.0187134	0.0206128	0.0182481	0.000850212	2.66885e-07	0.0121756	0.00377383	0.00839963	0.0101461	0.0057926	0.0119349	0.0138906	0.000602237	7.88956e-05	0.00010404
33	0.0269095	0.0317148	0.00698849	0.0171298	0.00171628	0.000182185	0.00778616	0.0213353	0.00857472	0.00572731	0.0130626	0.0149705	0.0161522	0.0033352	0.0408273	0.00256948	0.00123005	0.0136259	0.00209915	0.0565408	0.00171983	0.000892297	0.0472971	0.00395667	6.20506e-05	0.00128968	0.00254777	0.000734132	0.0398304	0.00365131	0.0583697	0.000602237	0.0223388	0.000192757	0.00248004
34	0.0010437	0.0304777	0.000308132	0.00240065	0.0868585	1.72874e-06	0.000279974	0.00115062	0.00120524	0.0286147	0.0425064	0.000589229	0.000345612	0.0343461	0.0742027	0.02619	0.000816296	0.00423417	0.00779422	0.04417	0.0198113	0.00640523	0.0184735	0.0189358	0.00130711	0.0573898	0.00789506	0.00316564	0.000137904	0.00525389	0.172773	7.88956e-05	0.000192757	0.0229855	0.00516099
35	0.021316	0.0260629	0.0066341	0.0349615	0.0104469	0.00375034	0.00366267	0.00083984	0.00103362	0.00660806	0.00211784	0.0233234	0.0174504	0.0307406	0.0265429	0.0443103	0.00214462	0.0434514	0.00101124	0.00217622	0.000757901	0.00235904	0.0254147	0.00293764	5.95984e-05	0.0218951	0.00699732	1.79776e-05	1.6641e-06	0.000531764	0.00796378	0.00010404	0.00248004	0.00516099	0.01
36-dimensional	118790	35640.1	1348.41	0.0136702	0.0933873	0.157071	0.4146	0.0527632	0.0328648	0.0045546	0.00792021	0.0225945	0.351144	0.144909	0.0251812	0.00281241	0.0366428	0.911537	0.0180485	0.618219	0.119394	0.0543093	0.00371493	0.0824559	0.108372	0.19879	0.0538217	0.0281993	0.00299295	0.00170994	0.0688366	0.00296033	0.0267281	0.00169656	0.0228174	0.000479172
2	35640.1	86164.2	18027.2	0.899001	0.127793	0.208888	0.490373	0.0102914	0.360653	0.0661027	0.0157547	0.00216887	0.052575	0.462071	0.213788	0.284395	0.944064	0.777622	0.029871	0.00023158	0.0784706	0.0340594	1.50026	0.0955351	0.0234206	0.0163107	0.000651665	0.000784996	0.0381102	0.00647538	0.0534031	0.00277845	0.0317423	0.0300456	0.0258352	9.3636e-06
3	1348.41	18027.2	41553.9	0.495649	0.110527	0.00176586	0.36243	0.151424	0.0436977	0.20628	0.225155	0.75515	0.118313	0.16442	1.1177	0.0135136	0.0656801	0.416162	0.0355814	0.490878	0.0213959	0.122869	0.00473134	0.065394	0.0168678	0.182886	0.148	0.111513	0.621424	0.0269818	0.193801	0.00672158	0.00786732	0.0098738	0.0163844	0.0406466
4	0.0136702	0.899001	0.495649	12.5506	0.180104	0.237491	0.203663	0.16805	0.019505	0.00145298	0.185993	0.071001	3.05091	0.533341	0.100797	0.135287	0.0372378	0.0024518	0.023126	0.00202804	0.113038	0.0204916	0.443498	0.0706314	0.0810938	0.000191057	0.0288117	0.00525601	0.0323754	0.0492647	0.0324473	0.00765022	0.0171542	0.00225654	0.0346445	1.35424e-05
5	0.0933873	0.127793	0.110527	0.180104	4.82267	0.000231126	0.115409	0.202004	0.0603303	0.571051	0.0297334	0.0582852	0.660054	0.340003	0.436308	7.60971e-08	0.0272746	0.281935	0.0396333	0.18442	0.0371288	0.489934	0.0317157	0.00885171	0.0537736	0.168291	0.026633	0.0771439	0.00157627	0.000502904	0.494184	5.48427e-05	0.00169684	0.0890972	0.0108905	8.649e-05
6	0.157071	0.208888	0.00176586	0.237491	0.000231126	9.24621	0.158668	0.0490979	0.067668	0.853989	0.0211566	0.308675	0.173072	0.00265597	0.394637	0.225376	0.154044	0.0670468	0.0334255	0.0537594	0.0795225	0.280643	0.39047	0.12884	0.0743385	0.00263561	0.120291	0.116144	0.0768468	0.000820681	0.00875791	0.00381726	0.000244966	0.00128598	0.00654425	0.00724712
7	0.4146	0.490373	0.36243	0.203663	0.115409	0.158668	4.67706	0.0392049	0.0145864	0.0330058	0.0131159	0.0943513	0.115397	0.000901388	0.00147487	0.523902	0.0182816	0.157259	0.000117857	0.0658858	0.00636852	0.0801667	0.0135221	0.006873	0.0199751	0.259396	0.000708542	0.00909739	0.00101322	0.00350068	0.0432611	0.000543765	0.00762012	2.43226e-06	0.00478219	0.00139801
8	0.0527632	0.0102914	0.151424	0.16805	0.202004	0.0490979	0.0392049	5.46413	0.0104388	2.87646e-05	0.0682165	0.46949	0.327285	0.426829	0.0123626	0.00796969	0.0146978	0.0230097	0.0394468	0.080858	0.0409546	0.000311688	0.0948258	0.000107172	0.000266865	0.0317954	0.0290375	0.000142131	0.0691718	0.00187127	0.0255794	0.00709416	0.021017	0.000268373	0.00151784	0.00186797
9	0.0328648	0.360653	0.0436977	0.019505	0.0603303	0.067668	0.0145864	0.0104388	3.89123	0.00981869	0.259741	0.0239814	0.0143748	0.0223609	0.655044	0.22607	0.0268064	0.362503	0.410811	9.66842e-06	0.333109	0.0435713	0.00923855	0.117782	0.139163	0.048464	0.043528	0.00278708	0.0864261	0.00192373	0.165764	0.0239151	0.00860394	0.00138717	0.00112819	3.88129e-05
10	0.0045546	0.0661027	0.20628	0.00145298	0.571051	0.853989	0.0330058	2.87646e-05	0.00981869	5.88338	0.0752214	0.596198	0.00706945	0.0213342	6.76608e-05	0.0217694	0.0260595	0.0907502	0.00186915	0.00896734	0.197353	0.00287233	0.159868	0.0288893	0.00574013	0.156565	0.00653431	0.0652013	0.260523	0.000132241	0.0355128	0.000794121	0.0063236	0.0115635	0.0021368	0.0230615
11	0.00792021	0.0157547	0.225155	0.185993	0.0297334	0.0211566	0.0131159	0.0682165	0.259741	0.0752214	4.32561	0.483971	0.536444	0.000886649	0.0246363	0.00360783	0.290084	0.172232	0.336458	0.0151655	1.30481	0.109909	0.0278647	0.0671026	0.11839	0.155891	0.100299	0.000102531	0.165282	0.0344756	0.16134	0.000968954	0.0135448	0.029803	0.000725679	0.00682937
12	0.0225945	0.00216887	0.75515	0.071001	0.0582852	0.308675	0.0943513	0.46949	0.0239814	0.596198	0.483971	8.40425	0.230202	0.0524645	0.393858	0.105394	0.238416	0.217097	0.000378168	0.379188	0.10799	0.333651	0.00346627	0.0267993	0.0230847	0.0257053	0.00473136	0.00934581	0.00491486	0.0363399	0.0212486	0.000754109	0.0148787	0.000918101	0.0243825	0.000220523
13	0.351144	0.052575	0.118313	3.05091	0.660054	0.173072	0.115397	0.327285	0.0143748	0.00706945	0.536444	0.230202	15.9455	0.0751715	2.00717	0.0578421	0.127251	0.005347	0.00128886	0.11249	1.52744	0.244717	0.130515	0.0845481	0.32528	0.0256879	0.11927	0.0377639	0.0169168	0.0587546	0.0858014	0.00106979	0.0146915	0.012758	0.0345184	0.0540702
14	0.144909	0.462071	0.16442	0.533341	0.340003	0.00265597	0.000901388	0.426829	0.0223609	0.0213342	0.000886649	0.0524645	0.0751715	1.94131	0.0198472	0.0531672	0.223064	0.0717028	0.0520607	0.167482	0.0307643	0.0266058	0.497516	0.0473581	0.00141811	0.00958112	0.0412929	0.0170717	0.00568297	0.0202923	0.0617931	0.00624469	0.00362081	0.0214563	0.0234782	0.00916423
15	0.0251812	0.213788	1.1177	0.100797	0.436308	0.394637	0.00147487	0.0123626	0.655044	6.76608e-05	0.0246363	0.393858	2.00717	0.0198472	11.0279	0.000899146	0.0107136	0.165487	0.0708622	0.904635	0.040654	0.555753	0.00935309	0.538158	0.00884733	0.263312	0.00536356	0.147277	0.329452	0.00114066	0.574809	0.023196	0.0433397	0.137369	0.0478796	0.0585979
16	0.00281241	0.284395	0.0135136	0.135287	7.60971e-08	0.225376	0.523902	0.00796969	0.22607	0.0217694	0.00360783	0.105394	0.0578421	0.0531672	0.000899146	1.96459	0.126206	0.533814	0.0842532	0.134015	0.0298773	0.103407	0.0539897	0.0340871	0.000890218	0.132848	0.058067	0.0221566	0.0319298	0.0077678	0.13702	0.00335436	0.00242761	0.0340766	0.0499315	0.00314721
17	0.0366428	0.944064	0.0656801	0.0372378	0.0272746	0.154044	0.0182816	0.0146978	0.0268064	0.0260595	0.290084	0.238416	0.127251	0.223064	0.0107136	0.126206	4.08974	0.485351	0.208898	0.172661	0.70448	0.336583	0.934202	0.156237	0.00573574	0.179594	0.00502225	0.0508894	0.00111028	3.87924e-06	0.0300472	0.00852641	0.00110955	9.42036e-08	0.00389278	0.00485112
18	0.911537	0.777622	0.416162	0.0024518	0.281935	0.0670468	0.157259	0.0230097	0.362503	0.0907502	0.172232	0.217097	0.005347	0.0717028	0.165487	0.533814	0.485351	9.19568	1.37095	0.0230212	0.000243312	0.172871	0.101483	0.0347524	0.0285643	0.00577774	0.0848712	0.0455209	0.00541899	0.000701486	0.00631789	0.00170889	0.0139887	0.00162511	0.0377769	0.00372222
19	0.0180485	0.029871	0.0355814	0.023126	0.0396333	0.0334255	0.000117857	0.0394468	0.410811	0.00186915	0.336458	0.000378168	0.00128886	0.0520607	0.0708622	0.0842532	0.208898	1.37095	2.39755	0.01027	0.126572	0.0259777	0.00645325	0.0547392	0.000308655	0.266743	0.00911414	0.0474035	0.0661566	0.00109412	0.000139848	0.00480352	0.00201016	0.0108222	0.000521715	0.00150544
20	0.618219	0.00023158	0.490878	0.00202804	0.18442	0.0537594	0.0658858	0.080858	9.66842e-06	0.00896734	0.0151655	0.379188	0.11249	0.167482	0.904635	0.134015	0.172661	0.0230212	0.01027	5.25419	0.0149844	0.0483072	0.000124658	0.28484	0.0297335	0.0627484	0.0165073	0.150245	5.58155e-05	0.0176641	0.670582	0.00870674	0.0572095	0.054127	0.00114622	0.00307027
21	0.119394	0.0784706	0.0213959	0.113038	0.0371288	0.0795225	0.00636852	0.0409546	0.333109	0.197353	1.30481	0.10799	1.52744	0.0307643	0.040654	0.0298773	0.70448	0.000243312	0.126572	0.0149844	4.33185	0.129268	0.0209481	0.039201	0.543454	0.0166557	0.144805	0.117561	0.0142218	0.181092	0.364868	0.0249362	0.00165536	0.0235133	0.000414834	0.00096224
22	0.0543093	0.0340594	0.122869	0.0204916	0.489934	0.280643	0.0801667	0.000311688	0.0435713	0.00287233	0.109909	0.333651	0.244717	0.0266058	0.555753	0.103407	0.336583	0.172871	0.0259777	0.0483072	0.129268	3.03669	0.0110522	0.00162765	0.0442859	0.00162393	0.0743527	0.239936	0.0325189	0.0371354	0.0390012	0.00792826	0.000775319	0.0126656	0.00449804	0.00641761
23	0.00371493	1.50026	0.00473134	0.443498	0.0317157	0.39047	0.0135221	0.0948258	0.00923855	0.159868	0.0278647	0.00346627	0.130515	0.497516	0.00935309	0.0539897	0.934202	0.101483	0.00645325	0.000124658	0.0209481	0.0110522	6.59644	0.090507	0.0388643	0.0875901	0.0338442	0.090553	0.00341578	0.00978043	0.102181	0.0384486	0.0463161	0.0296808	0.03244	0.00802995
24	0.0824559	0.0955351	0.065394	0.0706314	0.00885171	0.12884	0.006873	0.000107172	0.117782	0.0288893	0.0671026	0.0267993	0.0845481	0.0473581	0.538158	0.0340871	0.156237	0.0347524	0.0547392	0.28484	0.039201	0.00162765	0.090507	0.857827	0.0977785	0.0744155	0.00435819	0.0117902	0.04976	0.0121869	0.0252867	0.00312426	0.00356897	0.0354614	0.00689746	0.0156125
25	0.108372	0.0234206	0.0168678	0.0810938	0.0537736	0.0743385	0.0199751	0.000266865	0.139163	0.00574013	0.11839	0.0230847	0.32528	0.00141811	0.00884733	0.000890218	0.00573574	0.0285643	0.000308655	0.0297335	0.543454	0.0442859	0.0388643	0.0977785	0.331206	0.000365566	0.0426856	0.043069	0.000761829	0.0510454	0.00961327	0.00025352	5.2798e-05	0.00211177	4.59573e-06	0.000583223
26	0.19879	0.0163107	0.182886	0.000191057	0.168291	0.00263561	0.259396	0.0317954	0.048464	0.156565	0.155891	0.0257053	0.0256879	0.00958112	0.263312	0.132848	0.179594	0.00577774	0.266743	0.0627484	0.0166557	0.00162393	0.0875901	0.0744155	0.000365566	1.408	0.0038347	0.121302	0.0839712	0.00043688	0.129556	0.0207763	0.00138148	0.0481424	0.0186338	0.00246512
27	0.0538217	0.000651665	0.148	0.0288117	0.026633	0.120291	0.000708542	0.0290375	0.043528	0.00653431	0.100299	0.00473136	0.11927	0.0412929	0.00536356	0.058067	0.00502225	0.0848712	0.00911414	0.0165073	0.144805	0.0743527	0.0338442	0.00435819	0.0426856	0.0038347	0.440652	0.00127547	0.00110067	0.021105	0.0751321	0.00378136	0.00254754	0.00790155	0.0070008	8.1e-09
28	0.0281993	0.000784996	0.111513	0.00525601	0.0771439	0.116144	0.00909739	0.000142131	0.00278708	0.0652013	0.000102531	0.00934581	0.0377639	0.0170717	0.147277	0.0221566	0.0508894	0.0455209	0.0474035	0.150245	0.117561	0.239936	0.090553	0.0117902	0.043069	0.121302	0.00127547	0.235531	0.0323837	0.0225557	0.000630093	0.015812	0.000667064	0.0012915	0.000249823	0.00250901
29	0.00299295	0.0381102	0.621424	0.0323754	0.00157627	0.0768468	0.00101322	0.0691718	0.0864261	0.260523	0.165282	0.00491486	0.0169168	0.00568297	0.329452	0.0319298	0.00111028	0.00541899	0.0661566	5.58155e-05	0.0142218	0.0325189	0.00341578	0.04976	0.000761829	0.0839712	0.00110067	0.0323837	0.542152	0.00392426	0.106822	0.00061516	0.0409648	0.00112357	0.00073141	0.0124412
30	0.00170994	0.00647538	0.0269818	0.0492647	0.000502904	0.000820681	0.00350068	0.00187127	0.00192373	0.000132241	0.0344756	0.0363399	0.0587546	0.0202923	0.00114066	0.0077678	3.87924e-06	0.000701486	0.00109412	0.0176641	0.181092	0.0371354	0.00978043	0.0121869	0.0510454	0.00043688	0.021105	0.0225557	0.00392426	0.0673053	0.166936	0.0137493	0.00383848	0.00941178	8.28481e-05	0.0036542
31	0.0688366	0.0534031	0.193801	0.0324473	0.494184	0.00875791	0.0432611	0.0255794	0.165764	0.0355128	0.16134	0.0212486	0.0858014	0.0617931	0.574809	0.13702	0.0300472	0.00631789	0.000139848	0.670582	0.364868	0.0390012	0.102181	0.0252867	0.00961327	0.129556	0.0751321	0.000630093	0.106822	0.166936	2.8515	0.0235327	0.0591654	0.19535	0.0108615	0.00420812
32	0.00296033	0.00277845	0.00672158	0.00765022	5.48427e-05	0.00381726	0.000543765	0.00709416	0.0239151	0.000794121	0.000968954	0.000754109	0.00106979	0.00624469	0.023196	0.00335436	0.00852641	0.00170889	0.00480352	0.00870674	0.0249362	0.00792826	0.0384486	0.00312426	0.00025352	0.0207763	0.00378136	0.015812	0.00061516	0.0137493	0.0235327	0.0269595	0.000520677	0.00133262	3.04413e-05	0.00463352
33	0.0267281	0.0317423	0.00786732	0.0171542	0.00169684	0.000244966	0.00762012	0.021017	0.00860394	0.0063236	0.0135448	0.0148787	0.0146915	0.00362081	0.0433397	0.00242761	0.00110955	0.0139887	0.00201016	0.0572095	0.00165536	0.000775319	0.0463161	0.00356897	5.2798e-05	0.00138148	0.00254754	0.000667064	0.0409648	0.00383848	0.0591654	0.000520677	0.0223579	0.000222319	0.0024222	6.4009e-06
34	0.00169656	0.0300456	0.0098738	0.00225654	0.0890972	0.00128598	2.43226e-06	0.000268373	0.00138717	0.0115635	0.029803	0.000918101	0.012758	0.0214563	0.137369	0.0340766	9.42036e-08	0.00162511	0.0108222	0.054127	0.0235133	0.0126656	0.0296808	0.0354614	0.00211177	0.0481424	0.00790155	0.0012915	0.00112357	0.00941178	0.19535	0.00133262	0.000222319	0.02825	0.00659505	0.00164674
35	0.0228174	0.0258352	0.0163844	0.0346445	0.0108905	0.00654425	0.00478219	0.00151784	0.00112819	0.0021368	0.000725679	0.0243825	0.0345184	0.0234782	0.0478796	0.0499315	0.00389278	0.0377769	0.000521715	0.00114622	0.000414834	0.00449804	0.03244	0.00689746	4.59573e-06	0.0186338	0.0070008	0.000249823	0.00073141	8.28481e-05	0.0108615	3.04413e-05	0.0024222	0.00659505	0.0110947	0.000533148
36	0.000479172	9.3636e-06	0.0406466	1.35424e-05	8.649e-05	0.00724712	0.00139801	0.00186797	3.88129e-05	0.0230615	0.00682937	0.000220523	0.0540702	0.00916423	0.0585979	0.00314721	0.00485112	0.00372222	0.00150544	0.00307027	0.00096224	0.00641761	0.00802995	0.0156125	0.000583223	0.00246512	8.1e-09	0.00250901	0.0124412	0.0036542	0.00420812	0.00463352	6.4009e-06	0.00164674	0.000533148	0.01
37-dimensional	118797	35637.2	1347.92	0.012698	0.111557	0.159119	0.519562	0.0480272	0.0442942	0.00611494	0.00359529	0.0300115	0.371055	0.161706	0.0413681	0.0118634	0.0520781	0.927587	0.0198999	0.658203	0.123361	0.040317	0.00168546	0.0919963	0.134988	0.211395	0.0286451	0.0172027	0.00180261	0.00330118	0.0563314	0.00247606	0.0248753	0.00153078	0.0257869	9.02566e-06	0.000972192
2	35637.2	86167.7	18028.6	0.89269	0.112302	0.207039	0.578853	0.012046	0.388772	0.0705101	0.0220162	0.00417579	0.0587278	0.485326	0.247578	0.333264	0.888623	0.789286	0.0280694	2.01468e-05	0.0759791	0.0440775	1.53888	0.103561	0.0151178	0.01923	0.00561483	8.67832e-07	0.0344372	0.00459544	0.0628981	0.00317774	0.0301446	0.0294849	0.0283033	0.000321483	0.000602703
3	1347.92	18028.6	41555.8	0.499773	0.0978743	0.00191841	0.301333	0.157145	0.0356846	0.19962	0.206539	0.727903	0.110576	0.152629	1.05341	0.0239694	0.0793371	0.408743	0.0338526	0.515382	0.0225609	0.13897	0.006809	0.0598149	0.0244131	0.174762	0.116555	0.0952088	0.634826	0.0307569	0.209307	0.007258	0.00858942	0.00959271	0.0181113	0.0355607	0.00046311
4	0.012698	0.89269	0.499773	12.5636	0.190759	0.238585	0.174551	0.171839	0.0232158	0.00111912	0.175245	0.0764214	3.02576	0.519778	0.11354	0.117974	0.0436774	0.00282604	0.0222441	0.00116507	0.114711	0.0166672	0.432031	0.0744214	0.0908484	0.000395391	0.0388359	0.00783435	0.0304838	0.0524275	0.0364927	0.00800851	0.0178186	0.00234276	0.0331168	2.06607e-05	0.000184416
5	0.111557	0.112302	0.0978743	0.190759	5.19415	5.89384e-05	0.318615	0.230669	0.0257188	0.524731	0.0661906	0.0951151	0.583729	0.270812	0.625949	0.0267589	0.00332556	0.308502	0.032198	0.252583	0.0438169	0.366883	0.0143884	0.00219683	0.118018	0.136575	0.120094	0.0290058	0.00570015	0.000606774	0.39672	0.000440584	0.00336957	0.0927343	0.00585442	0.00415836	0.00830103
6	0.159119	0.207039	0.00191841	0.238585	5.89384e-05	9.25036	0.175315	0.047867	0.0717488	0.859241	0.0189782	0.301964	0.176744	0.0032742	0.409657	0.211538	0.161788	0.0659036	0.0340799	0.056878	0.0786741	0.289769	0.383911	0.125786	0.0689215	0.00227061	0.109037	0.122878	0.075058	0.000594445	0.0100427	0.00397096	0.000199467	0.0013255	0.00614221	0.00812397	6.82276e-05
7	0.519562	0.578853	0.301333	0.174551	0.318615	0.175315	7.67906	0.0792283	0.123611	0.0709722	0.0132651	0.23865	0.221635	0.0195259	0.153726	1.35942	0.0242697	0.214151	0.0041009	0.00344339	0.0155863	0.000782983	0.0016905	0.0444063	0.0259005	0.383685	0.220693	0.149192	0.00423613	0.0046565	0.000100312	0.000181164	0.0017355	0.000320021	0.0208906	0.012548	0.0608461
8	0.0480272	0.012046	0.157145	0.171839	0.230669	0.047867	0.0792283	5.51779	0.0179117	0.000288569	0.0527488	0.436015	0.307033	0.396941	0.0255063	0.0224784	0.00661184	0.0203367	0.0423982	0.0970439	0.0434938	0.000301002	0.108591	0.000777756	0.00334125	0.0374109	0.0104662	0.00268593	0.0623549	0.00368893	0.0176294	0.00796956	0.019241	0.00034679	0.00243059	0.00051634	0.00114515
9	0.0442942	0.388772	0.0356846	0.0232158	0.0257188	0.0717488	0.123611	0.0179117	4.24432	0.0172215	0.356147	0.0500202	0.00492408	0.0457662	0.890208	0.413684	0.00284537	0.393376	0.385357	0.00611806	0.313679	0.0933463	0.00132571	0.0868513	0.0667626	0.0318179	0.000413447	0.00331142	0.109393	0.00849885	0.232555	0.0284248	0.0121149	0.000964125	0.00386679	0.00254473	0.00875534
10	0.00611494	0.0705101	0.19962	0.00111912	0.524731	0.859241	0.0709722	0.000288569	0.0172215	5.94076	0.0937903	0.557837	0.0104722	0.0287988	0.00330357	0.0437285	0.0146185	0.0963899	0.00128364	0.00450554	0.19182	0.000326253	0.142821	0.0352571	0.00113375	0.168935	0.000137104	0.0875278	0.246928	3.89648e-05	0.0466637	0.000531697	0.00535331	0.0110797	0.00321749	0.0298135	0.00117992
11	0.00359529	0.0220162	0.206539	0.175245	0.0661906	0.0189782	0.0132651	0.0527488	0.356147	0.0937903	4.69382	0.393403	0.611379	0.00881004	0.000549625	0.0114154	0.183819	0.193601	0.31357	0.0391627	1.26625	0.183055	0.0115578	0.0444311	0.0528856	0.124793	0.254112	0.0143839	0.196369	0.0189282	0.106885	0.00029735	0.0178515	0.0319694	2.30751e-06	0.000688392	0.00867133
12	0.0300115	0.00417579	0.727903	0.0764214	0.0951151	0.301964	0.23865	0.436015	0.0500202	0.557837	0.393403	8.72057	0.194239	0.0318462	0.53728	0.208321	0.16124	0.235874	1.29285e-05	0.309991	0.116994	0.251578	0.000143088	0.0407244	0.0585775	0.0162587	0.00626738	9.95789e-05	0.00979943	0.0522595	0.0419332	0.00147632	0.0183818	0.00123673	0.0178707	0.00352611	0.00540519
13	0.371055	0.0587278	0.110576	3.02576	0.583729	0.176744	0.221635	0.307033	0.00492408	0.0104722	0.611379	0.194239	16.1718	0.0965626	1.79709	0.0210992	0.0864555	0.00763631	0.00224274	0.0856965	1.50355	0.302122	0.156165	0.10132	0.255242	0.0338545	0.20457	0.0660449	0.0227839	0.046202	0.0626344	0.00165087	0.0124049	0.0119757	0.0408164	0.0401374	0.00282386
14	0.161706	0.485326	0.152629	0.519778	0.270812	0.0032742	0.0195259	0.396941	0.0457662	0.0287988	0.00881004	0.0318462	0.0965626	2.07554	0.00178135	0.125269	0.152967	0.0819363	0.0455099	0.125318	0.026514	0.0548967	0.561394	0.0641516	0.00217848	0.0165391	0.00418781	0.0448639	0.00233734	0.0114288	0.0923049	0.00472825	0.00225069	0.0201424	0.0303656	0.0188827	0.00473619
15	0.0413681	0.247578	1.05341	0.11354	0.625949	0.409657	0.153726	0.0255063	0.890208	0.00330357	0.000549625	0.53728	1.79709	0.00178135	12.4356	0.0515329	0.00430846	0.198278	0.0553599	1.13681	0.0518972	0.356619	0.03542	0.434668	0.0066647	0.201722	0.0463548	0.0460932	0.267957	0.00162265	0.413558	0.0301648	0.0329992	0.144495	0.030624	0.108185	0.0205578
16	0.0118634	0.333264	0.0239694	0.117974	0.0267589	0.211538	1.35942	0.0224784	0.413684	0.0437285	0.0114154	0.208321	0.0210992	0.125269	0.0515329	2.96842	0.02068	0.606426	0.0633126	0.0493752	0.042263	0.0185407	0.120222	0.0770113	0.0622389	0.197576	0.0143356	0.00390737	0.062057	0.032657	0.264216	0.00716418	0.000259575	0.0298367	0.0774115	0.00275265	0.032127
17	0.0520781	0.888623	0.0793371	0.0436774	0.00332556	0.161788	0.0242697	0.00661184	0.00284537	0.0146185	0.183819	0.16124	0.0864555	0.152967	0.00430846	0.02068	4.672	0.442236	0.232795	0.260324	0.741105	0.493065	0.794352	0.111647	0.0485299	0.227001	0.0277339	0.133004	0.000169769	0.00347651	0.0718369	0.00558745	0.00303981	5.62903e-05	0.000693825	0.0199105	0.0139169
18	0.927587	0.789286	0.408743	0.00282604	0.308502	0.0659036	0.214151	0.0203367	0.393376	0.0963899	0.193601	0.235874	0.00763631	0.0819363	0.198278	0.606426	0.442236	9.23942	1.35743	0.0300232	0.000420227	0.150555	0.112688	0.0401315	0.0407634	0.00774273	0.0563178	0.0330173	0.00397762	0.001628	0.0102064	0.00205576	0.0128388	0.00148501	0.0410326	0.00597019	0.000720386
19	0.0198999	0.0280694	0.0338526	0.0222441	0.032198	0.0340799	0.0041009	0.0423982	0.385357	0.00128364	0.31357	1.29285e-05	0.00224274	0.0455099	0.0553599	0.0633126	0.232795	1.35743	2.41196	0.0140772	0.129388	0.0336641	0.00885285	0.0600919	0.00193496	0.276777	0.0192808	0.0591205	0.0618707	0.00195481	0.000848544	0.00436826	0.00166841	0.0105273	0.000264139	0.000662605	0.000464834
20	0.658203	2.01468e-05	0.515382	0.00116507	0.252583	0.056878	0.00344339	0.0970439	0.00611806	0.00450554	0.0391627	0.309991	0.0856965	0.125318	1.13681	0.0493752	0.260324	0.0300232	0.0140772	5.55373	0.0116108	0.0917001	0.00160442	0.24217	0.0733309	0.0460805	0.00109262	0.0858258	0.00152171	0.0083625	0.569219	0.00661646	0.0503262	0.0566278	0.00340897	0.0108221	0.00644327
21	0.123361	0.0759791	0.0225609	0.114711	0.0438169	0.0786741	0.0155863	0.0434938	0.313679	0.19182	1.26625	0.116994	1.50355	0.026514	0.0518972	0.042263	0.741105	0.000420227	0.129388	0.0116108	4.34574	0.116043	0.0244567	0.0430375	0.576945	0.0188261	0.118189	0.103259	0.0125621	0.189208	0.382788	0.0258035	0.00139188	0.023144	0.000218662	0.000398398	0.000333428
22	0.040317	0.0440775	0.13897	0.0166672	0.366883	0.289769	0.000782983	0.000301002	0.0933463	0.000326253	0.183055	0.251578	0.302122	0.0548967	0.356619	0.0185407	0.493065	0.150555	0.0336641	0.0917001	0.116043	3.42106	0.00153072	0.000175787	0.00700346	3.45465e-05	0.00416208	0.37431	0.0488284	0.0193986	0.0786848	0.00541959	7.58319e-05	0.0111711	0.00973748	0.000304726	0.0106998
23	0.00168546	1.53888	0.006809	0.432031	0.0143884	0.383911	0.0016905	0.108591	0.00132571	0.142821	0.0115578	0.000143088	0.156165	0.561394	0.03542	0.120222	0.794352	0.112688	0.00885285	0.00160442	0.0244567	0.00153072	6.80725	0.111496	0.0141485	0.071541	0.0975808	0.0509295	0.00111381	0.00434784	0.137546	0.0422702	0.0413744	0.0282431	0.0398447	0.00259695	0.00407172
24	0.0919963	0.103561	0.0598149	0.0744214	0.00219683	0.125786	0.0444063	0.000777756	0.0868513	0.0352571	0.0444311	0.0407244	0.10132	0.0641516	0.434668	0.0770113	0.111647	0.0401315	0.0600919	0.24217	0.0430375	0.000175787	0.111496	0.90829	0.141523	0.0875713	0.0290018	0.0287943	0.0410911	0.0188126	0.0402438	0.00404769	0.00251544	0.0341812	0.00977867	0.00875396	0.00268531
25	0.134988	0.0151178	0.0244131	0.0908484	0.118018	0.0689215	0.0259005	0.00334125	0.0667626	0.00113375	0.0528856	0.0585775	0.255242	0.00217848	0.0066647	0.0622389	0.0485299	0.0407634	0.00193496	0.0733309	0.576945	0.00700346	0.0141485	0.141523	0.526591	0.00126608	0.00159957	0.00397298	0.000422085	0.0836507	0.0385721	0.00116916	0.000237273	0.00143201	0.0012464	0.00250725	0.0150161
26	0.211395	0.01923	0.174762	0.000395391	0.136575	0.00227061	0.383685	0.0374109	0.0318179	0.168935	0.124793	0.0162587	0.0338545	0.0165391	0.201722	0.197576	0.227001	0.00774273	0.276777	0.0460805	0.0188261	3.45465e-05	0.071541	0.0875713	0.00126608	1.45569	0.0230306	0.16074	0.074114	0.00193233	0.156631	0.0189019	0.000835782	0.0468543	0.0225444	0.00588112	0.00199273
27	0.0286451	0.00561483	0.116555	0.0388359	0.120094	0.109037	0.220693	0.0104662	0.000413447	0.000137104	0.254112	0.00626738	0.20457	0.00418781	0.0463548	0.0143356	0.0277339	0.0563178	0.0192808	0.00109262	0.118189	0.00416208	0.0975808	0.0290018	0.00159957	0.0230306	1.14232	0.0745377	0.00210597	0.00170859	0.0126758	0.000991484	0.00769175	0.0104475	0.00049159	0.0148794	0.0404975
28	0.0172027	8.67832e-07	0.0952088	0.00783435	0.0290058	0.122878	0.149192	0.00268593	0.00331142	0.0875278	0.0143839	9.95789e-05	0.0660449	0.0448639	0.0460932	0.00390737	0.133004	0.0330173	0.0591205	0.0858258	0.103259	0.37431	0.0509295	0.0287943	0.00397298	0.16074	0.0745377	0.389833	0.0178554	0.00797092	0.0143387	0.0116994	0.00226984	0.000791362	0.000409276	0.0147657	0.0139051
29	0.00180261	0.0344372	0.634826	0.0304838	0.00570015	0.075058	0.00423613	0.0623549	0.109393	0.246928	0.196369	0.00979943	0.0227839	0.00233734	0.267957	0.062057	0.000169769	0.00397762	0.0618707	0.00152171	0.0125621	0.0488284	0.00111381	0.0410911	0.000422085	0.074114	0.00210597	0.0178554	0.565123	0.00687858	0.12843	0.000358886	0.0439599	0.000955964	0.00152503	0.00769867	0.0015437
30	0.00330118	0.00459544	0.0307569	0.0524275	0.000606774	0.000594445	0.0046565	0.00368893	0.00849885	3.89648e-05	0.0189282	0.0522595	0.046202	0.0114288	0.00162265	0.032657	0.00347651	0.001628	0.00195481	0.0083625	0.189208	0.0193986	0.00434784	0.0188126	0.0836507	0.00193233	0.00170859	0.00797092	0.00687858	0.0818589	0.202529	0.0156146	0.00511379	0.00876004	4.46511e-05	0.000850632	0.00266772
31	0.0563314	0.0628981	0.209307	0.0364927	0.39672	0.0100427	0.000100312	0.0176294	0.232555	0.0466637	0.106885	0.0419332	0.0626344	0.0923049	0.413558	0.264216	0.0718369	0.0102064	0.000848544	0.569219	0.382788	0.0786848	0.137546	0.0402438	0.0385721	0.156631	0.0126758	0.0143387	0.12843	0.202529	3.0732	0.0273474	0.0666092	0.190682	0.0165755	0.000264274	0.00644167
32	0.00247606	0.00317774	0.007258	0.00800851	0.000440584	0.00397096	0.000181164	0.00796956	0.0284248	0.000531697	0.00029735	0.00147632	0.00165087	0.00472825	0.0301648	0.00716418	0.00558745	0.00205576	0.00436826	0.00661646	0.0258035	0.00541959	0.0422702	0.00404769	0.00116916	0.0189019	0.000991484	0.0116994	0.000358886	0.0156146	0.0273474	0.0276945	0.000402403	0.00126153	0.000101483	0.00348561	0.000222308
33	0.0248753	0.0301446	0.00858942	0.0178186	0.00336957	0.000199467	0.0017355	0.019241	0.0121149	0.00535331	0.0178515	0.0183818	0.0124049	0.00225069	0.0329992	0.000259575	0.00303981	0.0128388	0.00166841	0.0503262	0.00139188	7.58319e-05	0.0413744	0.00251544	0.000237273	0.000835782	0.00769175	0.00226984	0.0439599	0.00511379	0.0666092	0.000402403	0.0233931	0.000187297	0.00189767	7.52634e-05	0.00034225
34	0.00153078	0.0294849	0.00959271	0.00234276	0.0927343	0.0013255	0.000320021	0.00034679	0.000964125	0.0110797	0.0319694	0.00123673	0.0119757	0.0201424	0.144495	0.0298367	5.62903e-05	0.00148501	0.0105273	0.0566278	0.023144	0.0111711	0.0282431	0.0341812	0.00143201	0.0468543	0.0104475	0.000791362	0.000955964	0.00876004	0.190682	0.00126153	0.000187297	0.0283975	0.00627056	0.00198824	4.38244e-05
35	0.0257869	0.0283033	0.0181113	0.0331168	0.00585442	0.00614221	0.0208906	0.00243059	0.00386679	0.00321749	2.30751e-06	0.0178707	0.0408164	0.0303656	0.030624	0.0774115	0.000693825	0.0410326	0.000264139	0.00340897	0.000218662	0.00973748	0.0398447	0.00977867	0.0012464	0.0225444	0.00049159	0.000409276	0.00152503	4.46511e-05	0.0165755	0.000101483	0.00189767	0.00627056	0.0131494	2.09746e-05	0.000933914
36	9.02566e-06	0.000321483	0.0355607	2.06607e-05	0.00415836	0.00812397	0.012548	0.00051634	0.00254473	0.0298135	0.000688392	0.00352611	0.0401374	0.0188827	0.108185	0.00275265	0.0199105	0.00597019	0.000662605	0.0108221	0.000398398	0.000304726	0.00259695	0.00875396	0.00250725	0.00588112	0.0148794	0.0147657	0.00769867	0.000850632	0.000264274	0.00348561	7.52634e-05	0.00198824	2.09746e-05	0.0186834	0.00366872
37	0.000972192	0.000602703	0.00046311	0.000184416	0.00830103	6.82276e-05	0.0608461	0.00114515	0.00875534	0.00117992	0.00867133	0.00540519	0.00282386	0.00473619	0.0205578	0.032127	0.0139169	0.000720386	0.000464834	0.00644327	0.000333428	0.0106998	0.00407172	0.00268531	0.0150161	0.00199273	0.0404975	0.0139051	0.0015437	0.00266772	0.00644167	0.000222308	0.00034225	4.38244e-05	0.000933914	0.00366872	0.01
38-dimensional	118823	35634.6	1348.11	0.0230079	0.0881319	0.139373	0.599154	0.0889206	0.0776128	0.0274058	0.00834012	0.00546774	0.482745	0.194997	0.00844073	0.0168033	0.0944106	0.676784	0.0131708	0.69308	0.167189	0.0325303	0.00425815	0.0739678	0.0964393	0.276261	0.0224825	0.00865325	1.32867e-05	0.0195978	0.0365264	0.00478824	0.0108477	0.00219173	0.0135287	0.00564057	0.00989578	0.00384648
2	35634.6	86168.5	18028.5	0.905963	0.116812	0.211236	0.593484	0.00913347	0.404168	0.0790807	0.0203776	0.00219035	0.0664144	0.495242	0.228062	0.337568	0.862076	0.745139	0.0296733	6.88251e-05	0.0703817	0.0456303	1.52813	0.0999732	0.0177311	0.0226459	0.00614608	6.0457e-05	0.0319006	0.00280665	0.0671277	0.00279664	0.026899	0.0244262	0.0256933	0.00102061	1.21535e-06	0.000123877
3	1348.11	18028.5	41555.9	0.503514	0.0963073	0.0020731	0.305305	0.161417	0.037449	0.204941	0.204613	0.716474	0.114468	0.154724	1.03797	0.0235371	0.0763498	0.396673	0.0332003	0.513321	0.0214032	0.13794	0.00708214	0.0587813	0.0256312	0.178509	0.117449	0.0968093	0.630645	0.0288277	0.206452	0.00748401	0.00793018	0.0107666	0.0189272	0.0375836	0.000922224	1.764e-05
4	0.0230079	0.905963	0.503514	12.8455	0.225061	0.264584	0.222572	0.244704	0.00693781	0.0148873	0.149633	0.142216	3.33542	0.579061	0.202519	0.132838	0.0165993	0.0382407	0.0150006	0.0030963	0.0785293	0.0224443	0.400379	0.0927666	0.128923	0.00219552	0.031504	0.00248472	0.045773	0.0211091	0.0207839	0.011924	0.00626898	0.00150007	0.0187954	0.00557198	0.0213304	0.00395389
5	0.0881319	0.116812	0.0963073	0.225061	5.35882	0.000289247	0.263232	0.309786	0.0511384	0.654002	0.0826859	0.163426	0.716914	0.311905	0.807881	0.0206183	0.0179517	0.477488	0.0237305	0.232415	0.0236126	0.391162	0.00932969	0.000276159	0.158744	0.187582	0.107524	0.0429008	0.00144649	0.00302964	0.454921	0.00158033	4.01741e-05	0.0490894	0.00114102	0.000119136	0.0471924	0.00358442
6	0.139373	0.211236	0.0020731	0.264584	0.000289247	9.35405	0.146927	0.0276349	0.0495367	0.75496	0.0136683	0.233775	0.132108	0.000960389	0.510053	0.224391	0.122271	0.0266838	0.0408416	0.0503492	0.101647	0.275332	0.364233	0.111442	0.0505033	0.00835624	0.117678	0.105747	0.0898614	0.00628058	0.00482809	0.00576643	0.00247343	0.000429527	0.00239535	0.00145985	0.00904767	0.00169991
7	0.599154	0.593484	0.305305	0.222572	0.263232	0.146927	8.09296	0.0296045	0.198817	0.150015	0.00514949	0.123252	0.347332	0.0377731	0.0565073	1.42709	0.0703418	0.0720158	0.000763376	0.00085914	0.0418856	8.83005e-08	5.80198e-05	0.0280053	0.00676161	0.504873	0.246518	0.192758	0.0141159	0.0333018	0.00291259	0.000180786	0.00105556	0.0187283	0.00693156	0.0484605	0.00433093	0.00737022
8	0.0889206	0.00913347	0.161417	0.244704	0.309786	0.0276349	0.0296045	6.3073	3.80576e-05	0.0264106	0.0272975	0.208179	0.533085	0.505687	0.151224	0.0115288	0.0594256	0.0213171	0.0675791	0.0717801	0.00811105	0.000606765	0.14384	0.00851721	0.0305025	0.00338066	0.0201582	0.000704532	0.108549	0.0118535	0.0518765	0.0166966	0.0618968	0.0249593	0.019677	0.0335746	0.0914088	0.0162435
9	0.0776128	0.404168	0.037449	0.00693781	0.0511384	0.0495367	0.198817	3.80576e-05	4.75608	0.0817636	0.292929	0.00228312	0.0066491	0.0805521	0.556497	0.462212	0.00751408	0.143218	0.445368	0.0134091	0.209711	0.116766	0.00628434	0.122649	0.128949	0.00381688	0.00019218	0.0156479	0.159593	0.0568239	0.318221	0.0180015	0.0420026	0.0146819	0.00026333	0.0356418	0.0190029	0.012067
10	0.0274058	0.0790807	0.204941	0.0148873	0.654002	0.75496	0.150015	0.0264106	0.0817636	6.94705	0.0552387	0.945502	0.0881186	0.0672388	0.038325	0.0656078	0.00343651	7.16549e-05	0.00913135	0.000358797	0.0942694	0.000802602	0.187378	0.0135961	0.0265016	0.314165	0.00103262	0.146271	0.167102	0.0375089	0.103032	0.00451555	0.00235004	0.00808237	0.0019192	0.122528	0.0688315	0.0198359
11	0.00834012	0.0203776	0.204613	0.149633	0.0826859	0.0136683	0.00514949	0.0272975	0.292929	0.0552387	4.80529	0.298395	0.507037	0.00380556	0.00455434	0.0080924	0.243249	0.307489	0.290011	0.0326148	1.37427	0.169078	0.00770444	0.0343116	0.0337112	0.165597	0.238488	0.00789208	0.169323	0.0419751	0.13295	1.94656e-06	0.0080878	0.0118212	0.00141496	0.00808652	0.0398624	0.00255732
12	0.00546774	0.00219035	0.716474	0.142216	0.163426	0.233775	0.123252	0.208179	0.00228312	0.945502	0.298395	10.3001	0.438032	0.078574	1.04218	0.16238	0.366784	0.71947	0.00413485	0.373979	0.0373258	0.307263	0.00255117	0.0799201	0.151171	0.0884704	0.000860112	0.0117559	1.43639e-06	0.000241561	0.0073023	0.00784964	7.28358e-06	0.0348507	0.000376429	0.0202347	0.168759	0.025632
13	0.482745	0.0664144	0.114468	3.33542	0.716914	0.132108	0.347332	0.533085	0.0066491	0.0881186	0.507037	0.438032	17.7423	0.158891	2.52457	0.00982891	0.0139203	0.050789	0.000125773	0.0602664	1.20514	0.354203	0.116477	0.0617631	0.399215	0.109287	0.24531	0.116907	0.0563457	0.000970311	0.0217077	7.03752e-06	6.25392e-05	0.00671508	0.0107015	0.000697349	0.0565566	0.0190744
14	0.194997	0.495242	0.154724	0.579061	0.311905	0.000960389	0.0377731	0.505687	0.0805521	0.0672388	0.00380556	0.078574	0.158891	2.1938	0.0245239	0.140757	0.0961084	0.0202145	0.0577497	0.110383	0.0107503	0.065156	0.52481	0.0489005	0.000135784	0.0384673	0.00201676	0.0629664	7.28067e-05	0.000494624	0.123365	0.00786783	5.6357e-05	0.00289075	0.0166011	0.0473225	0.00425212	0.0040475
15	0.00844073	0.228062	1.03797	0.202519	0.807881	0.510053	0.0565073	0.151224	0.556497	0.038325	0.00455434	1.04218	2.52457	0.0245239	14.8204	0.027879	0.0267535	0.726694	0.0252903	1.00942	0.00367725	0.430868	0.066752	0.323119	0.0607561	0.409581	0.025385	0.105793	0.397115	0.0396046	0.60388	0.052915	0.113541	0.0171512	0.0021761	0.0104986	0.272678	0.0323316
16	0.0168033	0.337568	0.0235371	0.132838	0.0206183	0.224391	1.42709	0.0115288	0.462212	0.0656078	0.0080924	0.16238	0.00982891	0.140757	0.027879	3.00696	0.0102502	0.494381	0.0706393	0.0444293	0.0559901	0.0156664	0.111356	0.0679317	0.047902	0.230338	0.0169327	0.00689572	0.0729043	0.0506916	0.290419	0.00550224	0.000161992	0.0159932	0.064717	0.00893347	0.0118586	0.00111489
17	0.0944106	0.862076	0.0763498	0.0165993	0.0179517	0.122271	0.0703418	0.0594256	0.00751408	0.00343651	0.243249	0.366784	0.0139203	0.0961084	0.0267535	0.0102502	5.40082	0.909475	0.183551	0.306725	0.959192	0.553796	0.885487	0.15884	0.0106979	0.37423	0.0425252	0.196318	0.00861189	0.0522575	0.131789	0.0131557	0.027301	0.0339068	0.013766	0.0909868	0.0226716	0.0162486
18	0.676784	0.745139	0.396673	0.0382407	0.477488	0.0266838	0.0720158	0.0213171	0.143218	7.16549e-05	0.307489	0.71947	0.050789	0.0202145	0.726694	0.494381	0.909475	12.6198	1.14287	0.00917828	0.0361118	0.214005	0.179819	0.0990698	0.167697	0.0232139	0.0947456	0.103009	0.0419352	0.0681269	0.00458955	0.013528	0.095415	0.124135	0.132645	0.0432324	0.253917	0.0512796
19	0.0131708	0.0296733	0.0332003	0.0150006	0.0237305	0.0408416	0.000763376	0.0675791	0.445368	0.00913135	0.290011	0.00413485	0.000125773	0.0577497	0.0252903	0.0706393	0.183551	1.14287	2.46815	0.0108449	0.102578	0.0287329	0.0122408	0.0710576	0.00686739	0.23144	0.0157887	0.047119	0.0757782	0.000149476	6.14242e-06	0.002788	0.00600249	0.0260403	0.000196558	0.00626508	0.0123	0.00179861
20	0.69308	6.88251e-05	0.513321	0.0030963	0.232415	0.0503492	0.00085914	0.0717801	0.0134091	0.000358797	0.0326148	0.373979	0.0602664	0.110383	1.00942	0.0444293	0.306725	0.00917828	0.0108449	5.60903	0.00576818	0.0986519	0.000713239	0.259482	0.0573282	0.0318099	0.00191007	0.0739431	0.0036503	0.00210865	0.531396	0.00847561	0.0379423	0.0814364	0.00115377	0.0216424	6.72366e-05	0.00117032
21	0.167189	0.0703817	0.0214032	0.0785293	0.0236126	0.101647	0.0418856	0.00811105	0.209711	0.0942694	1.37427	0.0373258	1.20514	0.0107503	0.00367725	0.0559901	0.959192	0.0361118	0.102578	0.00576818	4.71358	0.0961164	0.0144263	0.0257529	0.454727	0.0556424	0.0991269	0.0697869	0.00290522	0.312151	0.473329	0.0172917	0.00184816	0.000543031	0.00658519	0.00943356	0.0315417	0.00864342
22	0.0325303	0.0456303	0.13794	0.0224443	0.391162	0.275332	8.83005e-08	0.000606765	0.116766	0.000802602	0.169078	0.307263	0.354203	0.065156	0.430868	0.0156664	0.553796	0.214005	0.0287329	0.0986519	0.0961164	3.46131	0.00270167	1.14658e-05	0.01297	0.00166792	0.00294414	0.399504	0.0583635	0.00910921	0.0930606	0.00704614	0.000389751	0.00360584	0.00564994	0.000577357	0.00115908	0.00108504
23	0.00425815	1.52813	0.00708214	0.400379	0.00932969	0.364233	5.80198e-05	0.14384	0.00628434	0.187378	0.00770444	0.00255117	0.116477	0.52481	0.066752	0.111356	0.885487	0.179819	0.0122408	0.000713239	0.0144263	0.00270167	6.88693	0.125052	0.00691792	0.0954113	0.0901394	0.0623346	0.00333997	0.0138924	0.116821	0.0474482	0.0562204	0.0493403	0.0517398	0.0100204	0.0213199	0.00152256
24	0.0739678	0.0999732	0.0587813	0.0927666	0.000276159	0.111442	0.0280053	0.00851721	0.122649	0.0135961	0.0343116	0.0799201	0.0617631	0.0489005	0.323119	0.0679317	0.15884	0.0990698	0.0710576	0.259482	0.0257529	1.14658e-05	0.125052	0.957609	0.178525	0.0587054	0.0238916	0.019215	0.054911	0.00488794	0.0265523	0.0063135	0.00879786	0.0649745	0.018213	0.0247119	0.0250499	0.00255328
25	0.0964393	0.0177311	0.0256312	0.128923	0.158744	0.0505033	0.00676161	0.0305025	0.128949	0.0265016	0.0337112	0.151171	0.399215	0.000135784	0.0607561	0.047902	0.0106979	0.167697	0.00686739	0.0573282	0.454727	0.01297	0.00691792	0.178525	0.655643	0.00381023	0.000131209	0.0142577	0.00135635	0.0279614	0.0164016	0.00395962	0.00406793	0.0271864	0.0101497	0.00427576	0.0996553	0.00840522
26	0.276261	0.0226459	0.178509	0.00219552	0.187582	0.00835624	0.504873	0.00338066	0.00381688	0.314165	0.165597	0.0884704	0.109287	0.0384673	0.409581	0.230338	0.37423	0.0232139	0.23144	0.0318099	0.0556424	0.00166792	0.0954113	0.0587054	0.00381023	1.74023	0.034151	0.217333	0.0423604	0.0343025	0.225504	0.029155	0.00393922	0.00481363	0.00553314	0.0442518	0.0320285	0.0112657
27	0.0224825	0.00614608	0.117449	0.031504	0.107524	0.117678	0.246518	0.0201582	0.00019218	0.00103262	0.238488	0.000860112	0.24531	0.00201676	0.025385	0.0169327	0.0425252	0.0947456	0.0157887	0.00191007	0.0991269	0.00294414	0.0901394	0.0238916	0.000131209	0.034151	1.16312	0.0853562	0.0042735	8.59273e-09	0.00798983	0.00170107	0.0131308	0.0211265	0.00197069	0.025981	0.0184032	0.000969077
28	0.00865325	6.0457e-05	0.0968093	0.00248472	0.0429008	0.105747	0.192758	0.000704532	0.0156479	0.146271	0.00789208	0.0117559	0.116907	0.0629664	0.105793	0.00689572	0.196318	0.103009	0.047119	0.0739431	0.0697869	0.399504	0.0623346	0.019215	0.0142577	0.217333	0.0853562	0.438478	0.0090523	5.54897e-05	0.0274143	0.0162396	0.0101509	0.00325762	0.000559842	0.039583	0.000135047	0.00378102
29	1.32867e-05	0.0319006	0.630645	0.045773	0.00144649	0.0898614	0.0141159	0.108549	0.159593	0.167102	0.169323	1.43639e-06	0.0563457	7.28067e-05	0.397115	0.0729043	0.00861189	0.0419352	0.0757782	0.0036503	0.00290522	0.0583635	0.00333997	0.054911	0.00135635	0.0423604	0.0042735	0.0090523	0.625537	0.0276286	0.164035	0.00148663	0.0695465	0.00311347	3.15619e-05	7.97234e-05	0.008565	0.00391626
30	0.0195978	0.00280665	0.0288277	0.0211091	0.00302964	0.00628058	0.0333018	0.0118535	0.0568239	0.0375089	0.0419751	0.000241561	0.000970311	0.000494624	0.0396046	0.0506916	0.0522575	0.0681269	0.000149476	0.00210865	0.312151	0.00910921	0.0138924	0.00488794	0.0279614	0.0343025	8.59273e-09	5.54897e-05	0.0276286	0.214566	0.301639	0.00693076	0.0347643	0.00824716	0.00779872	0.0191643	0.0523081	0.0177103
31	0.0365264	0.0671277	0.206452	0.0207839	0.454921	0.00482809	0.00291259	0.0518765	0.318221	0.103032	0.13295	0.0073023	0.0217077	0.123365	0.60388	0.290419	0.131789	0.00458955	6.14242e-06	0.531396	0.473329	0.0930606	0.116821	0.0265523	0.0164016	0.225504	0.00798983	0.0274143	0.164035	0.301639	3.27104	0.0201677	0.10398	0.111152	0.00570726	0.00602278	0.00589092	0.00555472
32	0.00478824	0.00279664	0.00748401	0.011924	0.00158033	0.00576643	0.000180786	0.0166966	0.0180015	0.00451555	1.94656e-06	0.00784964	7.03752e-06	0.00786783	0.052915	0.00550224	0.0131557	0.013528	0.002788	0.00847561	0.0172917	0.00704614	0.0474482	0.0063135	0.00395962	0.029155	0.00170107	0.0162396	0.00148663	0.00693076	0.0201677	0.03106	0.00222108	0.00623246	0.00105264	0.00970395	0.00655031	0.000982196
33	0.0108477	0.026899	0.00793018	0.00626898	4.01741e-05	0.00247343	0.00105556	0.0618968	0.0420026	0.00235004	0.0080878	7.28358e-06	6.25392e-05	5.6357e-05	0.113541	0.000161992	0.027301	0.095415	0.00600249	0.0379423	0.00184816	0.000389751	0.0562204	0.00879786	0.00406793	0.00393922	0.0131308	0.0101509	0.0695465	0.0347643	0.10398	0.00222108	0.0517771	0.0112354	0.0110698	0.0137945	0.0267178	0.00745978
34	0.00219173	0.0244262	0.0107666	0.00150007	0.0490894	0.000429527	0.0187283	0.0249593	0.0146819	0.00808237	0.0118212	0.0348507	0.00671508	0.00289075	0.0171512	0.0159932	0.0339068	0.124135	0.0260403	0.0814364	0.000543031	0.00360584	0.0493403	0.0649745	0.0271864	0.00481363	0.0211265	0.00325762	0.00311347	0.00824716	0.111152	0.00623246	0.0112354	0.129983	0.0317189	0.0480069	0.0813992	0.0192016
35	0.0135287	0.0256933	0.0189272	0.0187954	0.00114102	0.00239535	0.00693156	0.019677	0.00026333	0.0019192	0.00141496	0.000376429	0.0107015	0.0166011	0.0021761	0.064717	0.013766	0.132645	0.000196558	0.00115377	0.00658519	0.00564994	0.0517398	0.018213	0.0101497	0.00553314	0.00197069	0.000559842	3.15619e-05	0.00779872	0.00570726	0.00105264	0.0110698	0.0317189	0.0274305	0.00892567	0.0327379	0.0050951
36	0.00564057	0.00102061	0.0375836	0.00557198	0.000119136	0.00145985	0.0484605	0.0335746	0.0356418	0.122528	0.00808652	0.0202347	0.000697349	0.0473225	0.0104986	0.00893347	0.0909868	0.0432324	0.00626508	0.0216424	0.00943356	0.000577357	0.0100204	0.0247119	0.00427576	0.0442518	0.025981	0.039583	7.97234e-05	0.0191643	0.00602278	0.00970395	0.0137945	0.0480069	0.00892567	0.0871998	0.0419217	0.0158609
37	0.00989578	1.21535e-06	0.000922224	0.0213304	0.0471924	0.00904767	0.00433093	0.0914088	0.0190029	0.0688315	0.0398624	0.168759	0.0565566	0.00425212	0.272678	0.0118586	0.0226716	0.253917	0.0123	6.72366e-05	0.0315417	0.00115908	0.0213199	0.0250499	0.0996553	0.0320285	0.0184032	0.000135047	0.008565	0.0523081	0.00589092	0.00655031	0.0267178	0.0813992	0.0327379	0.0419217	0.295739	0.0443818
38	0.00384648	0.000123877	1.764e-05	0.00395389	0.00358442	0.00169991	0.00737022	0.0162435	0.012067	0.0198359	0.00255732	0.025632	0.0190744	0.0040475	0.0323316	0.00111489	0.0162486	0.0512796	0.00179861	0.00117032	0.00864342	0.00108504	0.00152256	0.00255328	0.00840522	0.0112657	0.000969077	0.00378102	0.00391626	0.0177103	0.00555472	0.000982196	0.00745978	0.0192016	0.0050951	0.0158609	0.0443818	0.01
39-dimensional	118847	35585.9	1352.92	0.0382102	0.0844091	0.172374	0.597488	0.0950826	0.0539286	0.021479	0.0119737	0.0116596	0.534941	0.232181	0.00234246	0.0146146	0.0943243	0.546169	0.00543181	0.741082	0.150128	0.0293045	0.00119971	0.0346019	0.101763	0.331947	0.0337012	0.0106513	0.00395819	0.0411926	0.0164918	6.67473e-06	0.0332696	0.00177037	0.00165216	0.000330835	0.004056	0.000148459	0.00342459
2	35585.9	86454.3	17962.4	1.24737	0.13371	0.0911236	0.587247	0.00328119	0.212521	0.0439508	0.00555531	0.0306506	0.156532	0.731871	0.0984153	0.30039	0.863059	0.300308	0.106942	0.013255	0.119743	0.0616007	1.82673	6.01933e-05	0.0102594	0.116264	0.00234016	0.000936378	0.161588	0.033979	0.245409	0.104594	0.210595	0.0303294	0.015595	0.102179	0.0184935	0.0312195	0.0486423
3	1352.92	17962.4	41606.8	0.629158	0.0889434	0.00118184	0.303037	0.177379	0.0110237	0.173428	0.174543	0.830705	0.166633	0.221117	0.875728	0.0289338	0.0764981	0.221027	0.0107762	0.438697	0.0350448	0.125234	0.000660405	0.00613709	0.0207223	0.269365	0.0775545	0.0850894	0.823178	0.00245676	0.111999	0.00255407	0.0568564	0.0089704	0.0795483	0.0002479	0.00144141	0.00827177	0.0124836
4	0.0382102	1.24737	0.629158	13.25	0.232816	0.212391	0.221274	0.257725	0.0203294	0.00955136	0.132263	0.111285	3.50855	0.660076	0.255644	0.124819	0.0166456	0.0915058	0.00489565	0.00844415	0.0946338	0.0260976	0.451458	0.171799	0.121275	0.0124294	0.0486229	0.00395231	0.0190878	0.00419551	0.00409514	0.000303122	0.0321241	0.0010673	0.00162742	0.00199347	0.0100567	7.1441e-07	0.00559953
5	0.0844091	0.13371	0.0889434	0.232816	5.36425	8.57781e-05	0.263437	0.311882	0.0473312	0.64833	0.0846236	0.158373	0.72843	0.320285	0.822408	0.0210853	0.0179447	0.499119	0.0214469	0.227384	0.0248468	0.393289	0.0104564	5.0541e-07	0.157499	0.195772	0.111645	0.0421237	0.00240113	0.00444826	0.470708	0.000700622	0.000433435	0.0494789	0.000391081	4.03255e-05	0.0443585	0.00256514	0.000117289
6	0.172374	0.0911236	0.00118184	0.212391	8.57781e-05	9.66955	0.14592	0.0319171	0.0275239	0.715168	0.0193301	0.195282	0.166623	0.00643253	0.436984	0.234622	0.122151	0.0705264	0.0230759	0.0670968	0.119028	0.287227	0.320467	0.192614	0.0459651	0.000878569	0.147573	0.0978079	0.138536	5.26518e-06	0.0213484	0.0267857	0.0211304	0.000703212	0.019999	0.00574703	0.0192823	0.0104319	0.00511511
7	0.597488	0.587247	0.303037	0.221274	0.263437	0.14592	8.09316	0.0297145	0.20012	0.150477	0.00523149	0.122502	0.345977	0.0372825	0.057159	1.42774	0.0703441	0.0734341	0.000836389	0.000912184	0.0421618	7.46842e-11	4.42808e-05	0.0289172	0.00671796	0.502617	0.247569	0.19304	0.0145622	0.0325831	0.00270369	0.000246572	0.00122147	0.0187691	0.00733337	0.0497606	0.00418408	0.00764172	3.3856e-06
8	0.0950826	0.00328119	0.177379	0.257725	0.311882	0.0319171	0.0297145	6.32244	5.75359e-05	0.0246113	0.0255521	0.217495	0.549057	0.522819	0.16142	0.0120921	0.0594053	0.0291776	0.0740609	0.0673449	0.00929621	0.000748277	0.137033	0.0138738	0.0296326	0.00186189	0.0174243	0.000553302	0.0972726	0.0162698	0.0606951	0.011647	0.0508857	0.024517	0.0264782	0.0241984	0.0851015	0.0126937	0.00030137
9	0.0539286	0.212521	0.0110237	0.0203294	0.0473312	0.0275239	0.20012	5.75359e-05	5.03382	0.0971279	0.320056	2.89636e-06	0.00102346	0.052578	0.647779	0.478436	0.00754708	0.241746	0.374254	0.00599366	0.183987	0.10843	0.014575	0.054681	0.137303	0.0169551	0.00352887	0.019287	0.230146	0.0234476	0.229656	0.00136797	0.0966487	0.0162783	0.00743336	0.0992873	0.0347107	0.0314432	0.00627739
10	0.021479	0.0439508	0.173428	0.00955136	0.64833	0.715168	0.150477	0.0246113	0.0971279	7.00267	0.0600573	0.982561	0.0764818	0.0561574	0.0294674	0.0681131	0.00344565	0.00143737	0.00529808	0.00120137	0.0871154	0.000540194	0.202365	0.0269829	0.0280503	0.283532	0.00257928	0.150621	0.141312	0.0252034	0.0819212	0.0114492	0.00843938	0.00856189	3.42567e-06	0.16142	0.0796391	0.0283836	0.001053
11	0.0119737	0.00555531	0.174543	0.132263	0.0846236	0.0193301	0.00523149	0.0255521	0.320056	0.0600573	4.84732	0.318372	0.479863	0.00163267	0.00818369	0.00894455	0.243176	0.358468	0.267106	0.0274277	1.34785	0.165113	0.0108072	0.0195451	0.0353724	0.188053	0.256169	0.00887726	0.196085	0.0567197	0.158214	0.00154716	0.0172367	0.0123722	0.00602306	0.0016497	0.0326666	0.000587093	0.000956665
12	0.0116596	0.0306506	0.830705	0.111285	0.158373	0.195282	0.122502	0.217495	2.89636e-06	0.982561	0.318372	10.5184	0.391208	0.0577396	0.955825	0.155458	0.366953	0.585368	0.00055187	0.340316	0.0295518	0.297236	0.00655102	0.0389178	0.157777	0.0611112	1.68322e-05	0.0140527	0.00361236	0.00610311	0.0218348	0.0255799	0.00647454	0.0366318	0.00894966	0.0552097	0.199249	0.0439443	0.00338259
13	0.534941	0.156532	0.166633	3.50855	0.72843	0.166623	0.345977	0.549057	0.00102346	0.0764818	0.479863	0.391208	18.0734	0.19505	2.67437	0.0117675	0.0139557	0.0990652	0.00303592	0.0463101	1.25594	0.365972	0.139882	0.0245433	0.387877	0.147919	0.210993	0.109583	0.0302871	0.00130633	0.00645289	0.0054847	0.00573262	0.00591051	0.00051002	0.0159034	0.0398269	0.00719968	0.00391125
14	0.232181	0.731871	0.221117	0.660076	0.320285	0.00643253	0.0372825	0.522819	0.052578	0.0561574	0.00163267	0.0577396	0.19505	2.3363	0.0431477	0.133154	0.0962108	0.00192146	0.0832875	0.0893457	0.0166087	0.0707806	0.578268	0.0144159	2.9227e-06	0.0653119	0.00713355	0.057101	0.00611891	0.00268318	0.180588	1.84765e-05	0.00714003	0.00352116	0.00158994	0.0116296	0.000534722	2.52145e-05	0.00473482
15	0.00234246	0.0984153	0.875728	0.255644	0.822408	0.436984	0.057159	0.16142	0.647779	0.0294674	0.00818369	0.955825	2.67437	0.0431477	15.2484	0.0317059	0.0266952	0.918988	0.0114276	0.938409	0.00771549	0.446296	0.0481783	0.210973	0.0555793	0.495826	0.0408156	0.0975513	0.307947	0.0778104	0.733921	0.0192956	0.0564658	0.0187636	0.00244118	0.0487949	0.227291	0.0135827	0.005519
16	0.0146146	0.30039	0.0289338	0.124819	0.0210853	0.234622	1.42774	0.0120921	0.478436	0.0681131	0.00894455	0.155458	0.0117675	0.133154	0.0317059	3.01469	0.0102429	0.524842	0.0651802	0.0475304	0.0586067	0.016258	0.106204	0.0798437	0.0469623	0.218127	0.0192398	0.00733392	0.0812985	0.0437158	0.273434	0.00312078	0.00106867	0.0156888	0.0749117	0.0139993	0.00995327	0.00212561	0.000222905
17	0.0943243	0.863059	0.0764981	0.0166456	0.0179447	0.122151	0.0703441	0.0594053	0.00754708	0.00344565	0.243176	0.366953	0.0139557	0.0962108	0.0266952	0.0102429	5.40082	0.908821	0.183695	0.306596	0.959364	0.55374	0.885723	0.158559	0.0106907	0.373976	0.0425821	0.196355	0.00865706	0.0521395	0.131602	0.0132233	0.0274072	0.0339139	0.0136933	0.0912177	0.0227159	0.0163007	5.76e-08
18	0.546169	0.300308	0.221027	0.0915058	0.499119	0.0705264	0.0734341	0.0291776	0.241746	0.00143737	0.358468	0.585368	0.0990652	0.00192146	0.918988	0.524842	0.908821	14.1128	0.938502	0.000706119	0.0189635	0.235241	0.121993	0.275283	0.15121	0.0760663	0.0509212	0.0876649	0.00360377	0.172053	0.0487839	0.00348049	0.0138756	0.116111	0.301402	0.000396763	0.173466	0.0109703	0.0204261
19	0.00543181	0.106942	0.0107762	0.00489565	0.0214469	0.0230759	0.000836389	0.0740609	0.374254	0.00529808	0.267106	0.00055187	0.00303592	0.0832875	0.0114276	0.0651802	0.183695	0.938502	2.62529	0.0049208	0.119693	0.0251239	0.00546491	0.136628	0.00528967	0.176801	0.0275516	0.0525687	0.0417018	0.00769637	0.00603085	0.0192855	0.000267276	0.0242383	0.0109725	0.00107012	0.00462253	0.00030091	0.00492383
20	0.741082	0.013255	0.438697	0.00844415	0.227384	0.0670968	0.000912184	0.0673449	0.00599366	0.00120137	0.0274277	0.340316	0.0463101	0.0893457	0.938409	0.0475304	0.306596	0.000706119	0.0049208	5.72072	0.00877639	0.103481	0.00270924	0.33703	0.060729	0.0186365	0.000251571	0.078598	0.000128996	3.84572e-05	0.458425	0.0010658	0.0673699	0.0792124	0.000821721	0.00488469	0.00143078	4.95828e-05	0.00234643
21	0.150128	0.119743	0.0350448	0.0946338	0.0248468	0.119028	0.0421618	0.00929621	0.183987	0.0871154	1.34785	0.0295518	1.25594	0.0166087	0.00771549	0.0586067	0.959364	0.0189635	0.119693	0.00877639	4.77196	0.0997087	0.0101919	0.0459029	0.44762	0.0417248	0.086319	0.0664618	0.000282963	0.269685	0.420896	0.00749818	0.00845323	0.000413619	0.00114328	0.0241772	0.0399962	0.0154125	0.00134029
22	0.0293045	0.0616007	0.125234	0.0260976	0.393289	0.287227	7.46842e-11	0.000748277	0.10843	0.000540194	0.165113	0.297236	0.365972	0.0707806	0.446296	0.016258	0.55374	0.235241	0.0251239	0.103481	0.0997087	3.47047	0.00191614	0.000697853	0.0124591	0.00295751	0.00400345	0.396063	0.0509426	0.00617332	0.103593	0.00418715	1.4972e-06	0.00375999	0.00301312	9.38597e-07	0.00190403	0.000383647	0.000245862
23	0.00119971	1.82673	0.000660405	0.451458	0.0104564	0.320467	4.42808e-05	0.137033	0.014575	0.202365	0.0108072	0.00655102	0.139882	0.578268	0.0481783	0.106204	0.885723	0.121993	0.00546491	0.00270924	0.0101919	0.00191614	7.03136	0.0766068	0.00571745	0.0695369	0.0729857	0.0669633	0.0122727	0.00379082	0.158281	0.079525	0.0942893	0.051241	0.0255405	0.0336761	0.0316884	0.0069849	0.00273738
24	0.0346019	6.01933e-05	0.00613709	0.171799	5.0541e-07	0.192614	0.0289172	0.0138738	0.054681	0.0269829	0.0195451	0.0389178	0.0245433	0.0144159	0.210973	0.0798437	0.158559	0.275283	0.136628	0.33703	0.0459029	0.000697853	0.0766068	1.42638	0.16104	0.0133245	0.057119	0.0269535	0.0073224	0.00776673	3.1152e-05	0.0101416	0.010526	0.0590508	0.105541	0.00592222	0.004684	0.00555815	0.0215737
25	0.101763	0.0102594	0.0207223	0.121275	0.157499	0.0459651	0.00671796	0.0296326	0.137303	0.0280503	0.0353724	0.157777	0.387877	2.9227e-06	0.0555793	0.0469623	0.0106907	0.15121	0.00528967	0.060729	0.44762	0.0124591	0.00571745	0.16104	0.659029	0.00242523	9.91478e-06	0.0148645	0.0026485	0.0334029	0.0206067	0.00650441	0.00690585	0.0275737	0.00673414	0.00781907	0.105313	0.010813	0.000208802
26	0.331947	0.116264	0.269365	0.0124294	0.195772	0.000878569	0.502617	0.00186189	0.0169551	0.283532	0.188053	0.0611112	0.147919	0.0653119	0.495826	0.218127	0.373976	0.0760663	0.176801	0.0186365	0.0417248	0.00295751	0.0695369	0.0133245	0.00242523	1.94261	0.0182667	0.203546	0.0860201	0.0773638	0.321953	0.00419994	0.00277962	0.00583334	0.00139064	0.00528094	0.0159116	0.00106193	0.00745978
27	0.0337012	0.00234016	0.0775545	0.0486229	0.111645	0.147573	0.247569	0.0174243	0.00352887	0.00257928	0.256169	1.68322e-05	0.210993	0.00713355	0.0408156	0.0192398	0.0425821	0.0509212	0.0275516	0.000251571	0.086319	0.00400345	0.0729857	0.057119	9.91478e-06	0.0182667	1.23548	0.0913002	0.0152739	0.00381378	0.0227919	0.0124878	0.0366516	0.0225016	0.000895758	0.0639184	0.010101	0.0064128	0.00330395
28	0.0106513	0.000936378	0.0850894	0.00395231	0.0421237	0.0978079	0.19304	0.000553302	0.019287	0.150621	0.00887726	0.0140527	0.109583	0.057101	0.0975513	0.00733392	0.196355	0.0876649	0.0525687	0.078598	0.0664618	0.396063	0.0669633	0.0269535	0.0148645	0.203546	0.0913002	0.442496	0.00600948	0.000684949	0.0215885	0.0221348	0.0153803	0.00342049	1.35208e-06	0.05139	0.000495633	0.00582289	0.00030276
29	0.00395819	0.161588	0.823178	0.0190878	0.00240113	0.138536	0.0145622	0.0972726	0.230146	0.141312	0.196085	0.00361236	0.0302871	0.00611891	0.307947	0.0812985	0.00865706	0.00360377	0.0417018	0.000128996	0.000282963	0.0509426	0.0122727	0.0073224	0.0026485	0.0860201	0.0152739	0.00600948	0.798316	0.00327658	0.0879125	0.0264996	0.159311	0.00409627	0.0157094	0.0232659	0.0238672	0.0221504	0.0102576
30	0.0411926	0.033979	0.00245676	0.00419551	0.00444826	5.26518e-06	0.0325831	0.0162698	0.0234476	0.0252034	0.0567197	0.00610311	0.00130633	0.00268318	0.0778104	0.0437158	0.0521395	0.172053	0.00769637	3.84572e-05	0.269685	0.00617332	0.00379082	0.00776673	0.0334029	0.0773638	0.00381378	0.000684949	0.00327658	0.33523	0.44156	0.0463254	0.00181305	0.00674013	0.0517277	0.00109565	0.0265369	0.00171792	0.0115778
31	0.0164918	0.245409	0.111999	0.00409514	0.470708	0.0213484	0.00270369	0.0606951	0.229656	0.0819212	0.158214	0.0218348	0.00645289	0.180588	0.733921	0.273434	0.131602	0.0487839	0.00603085	0.458425	0.420896	0.103593	0.158281	3.1152e-05	0.0206067	0.321953	0.0227919	0.0215885	0.0879125	0.44156	3.69944	0.0747644	0.0321134	0.117014	0.00396719	0.0086855	0.000126012	0.000279238	0.011479
32	6.67473e-06	0.104594	0.00255407	0.000303122	0.000700622	0.0267857	0.000246572	0.011647	0.00136797	0.0114492	0.00154716	0.0255799	0.0054847	1.84765e-05	0.0192956	0.00312078	0.0132233	0.00348049	0.0192855	0.0010658	0.00749818	0.00418715	0.079525	0.0101416	0.00650441	0.00419994	0.0124878	0.0221348	0.0264996	0.0463254	0.0747644	0.106729	0.0445788	0.0078999	0.0159151	0.0864673	0.0243213	0.0184409	0.0150455
33	0.0332696	0.210595	0.0568564	0.0321241	0.000433435	0.0211304	0.00122147	0.0508857	0.0966487	0.00843938	0.0172367	0.00647454	0.00573262	0.00714003	0.0564658	0.00106867	0.0274072	0.0138756	0.000267276	0.0673699	0.00845323	1.4972e-06	0.0942893	0.010526	0.00690585	0.00277962	0.0366516	0.0153803	0.159311	0.00181305	0.0321134	0.0445788	0.165104	0.0136487	0.00457976	0.109303	0.0601391	0.040095	0.0178784
34	0.00177037	0.0303294	0.0089704	0.0010673	0.0494789	0.000703212	0.0187691	0.024517	0.0162783	0.00856189	0.0123722	0.0366318	0.00591051	0.00352116	0.0187636	0.0156888	0.0339139	0.116111	0.0242383	0.0792124	0.000413619	0.00375999	0.051241	0.0590508	0.0275737	0.00583334	0.0225016	0.00342049	0.00409627	0.00674013	0.117014	0.0078999	0.0136487	0.130457	0.0280981	0.0538323	0.0842505	0.0211609	6.561e-05
35	0.00165216	0.015595	0.0795483	0.00162742	0.000391081	0.019999	0.00733337	0.0264782	0.00743336	3.42567e-06	0.00602306	0.00894966	0.00051002	0.00158994	0.00244118	0.0749117	0.0136933	0.301402	0.0109725	0.000821721	0.00114328	0.00301312	0.0255405	0.105541	0.00673414	0.00139064	0.000895758	1.35208e-06	0.0157094	0.0517277	0.00396719	0.0159151	0.00457976	0.0280981	0.11076	0.0124667	0.0103747	0.00150016	0.0167185
36	0.000330835	0.102179	0.0002479	0.00199347	4.03255e-05	0.00574703	0.0497606	0.0241984	0.0992873	0.16142	0.0016497	0.0552097	0.0159034	0.0116296	0.0487949	0.0139993	0.0912177	0.000396763	0.00107012	0.00488469	0.0241772	9.38597e-07	0.0336761	0.00592222	0.00781907	0.00528094	0.0639184	0.05139	0.0232659	0.00109565	0.0086855	0.0864673	0.109303	0.0538323	0.0124667	0.301888	0.0913545	0.068488	0.0254147
37	0.004056	0.0184935	0.00144141	0.0100567	0.0443585	0.0192823	0.00418408	0.0851015	0.0347107	0.0796391	0.0326666	0.199249	0.0398269	0.000534722	0.227291	0.00995327	0.0227159	0.173466	0.00462253	0.00143078	0.0399962	0.00190403	0.0316884	0.004684	0.105313	0.0159116	0.010101	0.000495633	0.0238672	0.0265369	0.000126012	0.0243213	0.0601391	0.0842505	0.0103747	0.0913545	0.337821	0.0690396	0.00374055
38	0.000148459	0.0312195	0.00827177	7.1441e-07	0.00256514	0.0104319	0.00764172	0.0126937	0.0314432	0.0283836	0.000587093	0.0439443	0.00719968	2.52145e-05	0.0135827	0.00212561	0.0163007	0.0109703	0.00030091	4.95828e-05	0.0154125	0.000383647	0.0069849	0.00555815	0.010813	0.00106193	0.0064128	0.00582289	0.0221504	0.00171792	0.000279238	0.0184409	0.040095	0.0211609	0.00150016	0.068488	0.0690396	0.0297639	0.00725223
39	0.00342459	0.0486423	0.0124836	0.00559953	0.000117289	0.00511511	3.3856e-06	0.00030137	0.00627739	0.001053	0.000956665	0.00338259	0.00391125	0.00473482	0.005519	0.000222905	5.76e-08	0.0204261	0.00492383	0.00234643	0.00134029	0.000245862	0.00273738	0.0215737	0.000208802	0.00745978	0.00330395	0.00030276	0.0102576	0.0115778	0.011479	0.0150455	0.0178784	6.561e-05	0.0167185	0.0254147	0.00374055	0.00725223	0.01
40-dimensional	118852	35609.8	1355.18	0.0365648	0.0908992	0.18609	0.60589	0.098765	0.0496531	0.0271569	0.00817125	0.0124873	0.572463	0.241575	0.00554239	0.0201123	0.0954242	0.529012	0.00428905	0.891323	0.163715	0.027018	0.00270765	0.0501167	0.0786949	0.352371	0.0216708	0.0167776	0.00730271	0.0407003	0.0204751	0.00059875	0.0321875	0.0109845	9.6833e-06	0.00035765	0.00410973	0.00096788	0.00144266	0.000785681
2	35609.8	86756.2	18029.1	1.32536	0.206345	0.187307	0.522091	0.0110408	0.28829	0.00387843	0.00627956	0.0209179	0.0368154	0.604517	0.0106536	0.143615	0.890076	0.41287	0.0679513	0.310821	0.234898	0.0372993	2.22654	0.0983685	0.0439495	0.0399527	0.11715	0.033166	0.0483214	0.0376998	0.376926	0.0214772	0.233362	0.463874	0.0318407	0.383734	0.0194291	0.0299903	0.149393	0.0513068
3	1355.18	18029.1	41656	0.602989	0.116407	0.00957539	0.326847	0.197435	0.00464879	0.238043	0.242399	0.857828	0.25705	0.258107	1.07715	0.00776296	0.0726773	0.180027	0.00513262	0.113044	0.0143982	0.107051	0.00881038	0.0513659	0.0868495	0.345052	0.177222	0.0355582	0.991237	0.00295195	0.153776	0.0185737	0.0514056	0.115933	0.184129	0.025954	0.00131904	0.0679005	0.000977493	0.0120604
4	0.0365648	1.32536	0.602989	13.2668	0.23858	0.220555	0.218524	0.254483	0.0189043	0.0077185	0.124873	0.11265	3.45758	0.651611	0.270108	0.116939	0.016896	0.0877126	0.00553761	0.00219151	0.100436	0.0249189	0.464208	0.189212	0.107196	0.0104104	0.0576971	0.00236311	0.02261	0.0041106	0.00314139	0.00085632	0.0327074	1.69869e-06	0.00368071	0.00419134	0.0100111	0.000510841	0.00738781	0.000230432
5	0.0908992	0.206345	0.116407	0.23858	5.43534	0.00101552	0.27125	0.302733	0.0532073	0.608002	0.100776	0.162584	0.669611	0.305225	0.889649	0.0304179	0.0172835	0.476319	0.0249333	0.351636	0.0329655	0.381454	0.0160104	0.00271475	0.117769	0.174807	0.148132	0.0585489	0.00030797	0.00467756	0.499215	0.00324972	0.000624607	0.0960793	0.00520533	0.0033775	0.0441117	0.0123335	0.00155914	0.00152959
6	0.18609	0.187307	0.00957539	0.220555	0.00101552	9.87844	0.154576	0.0364234	0.0214706	0.780185	0.00995848	0.188476	0.211777	0.0100207	0.510884	0.194679	0.124738	0.0839225	0.018219	0.18548	0.095871	0.302485	0.362374	0.130195	0.0862813	4.04872e-05	0.0955779	0.0668029	0.175299	2.30699e-05	0.0134232	0.0435948	0.0193755	0.0105757	0.0478812	4.82908e-07	0.0190423	0.0366394	0.000850885	0.00334084
7	0.60589	0.522091	0.326847	0.218524	0.27125	0.154576	8.11441	0.0283257	0.194367	0.160387	0.00730092	0.124326	0.366725	0.0398956	0.0660663	1.46242	0.0709984	0.0691286	0.0005411	0.000738224	0.0471572	2.21402e-05	2.84893e-05	0.038471	0.00307388	0.519826	0.273143	0.177426	0.0110538	0.0322811	0.00175435	3.81367e-07	0.00136982	0.032486	0.0035717	0.0618232	0.00414667	0.00331491	0.000255864	0.000373262
8	0.098765	0.0110408	0.197435	0.254483	0.302733	0.0364234	0.0283257	6.34485	0.000214856	0.029107	0.0303369	0.220148	0.577548	0.533377	0.146049	0.00887571	0.0600623	0.032264	0.0774628	0.0387501	0.00697286	0.00105521	0.146901	0.00797336	0.0404433	0.000900388	0.0254014	1.37446e-05	0.086976	0.0160371	0.0553755	0.00836248	0.0519065	0.0415348	0.0364719	0.0336672	0.0852862	0.00641203	3.61011e-06	0.00044521
9	0.0496531	0.28829	0.00464879	0.0189043	0.0532073	0.0214706	0.194367	0.000214856	5.08437	0.0840103	0.294826	7.85803e-06	3.37459e-06	0.0474185	0.598607	0.444442	0.00718065	0.2557	0.362338	0.000489395	0.202006	0.10313	0.00998422	0.0778997	0.10532	0.0228286	0.000253195	0.0290213	0.256737	0.0238952	0.246779	0.000116934	0.0944377	0.00276346	0.0171882	0.0732957	0.0345236	0.0524856	0.0029888	0.00112359
10	0.0271569	0.00387843	0.238043	0.0077185	0.608002	0.780185	0.160387	0.029107	0.0840103	7.22848	0.083657	0.965303	0.11228	0.0672757	0.0123655	0.0958266	0.00394936	0.000115704	0.00843532	0.0251354	0.0651967	0.00152554	0.240328	0.0635654	0.0659412	0.328333	0.0182796	0.10693	0.183387	0.0243149	0.0635879	0.00315868	0.00976302	0.0567082	0.00791614	0.238032	0.0801909	0.00462165	0.00641913	0.0042328
11	0.00817125	0.00627956	0.242399	0.124873	0.100776	0.00995848	0.00730092	0.0303369	0.294826	0.083657	5.0524	0.308158	0.568208	0.00406799	0.0235788	0.0211011	0.238929	0.325339	0.288055	0.13485	1.25311	0.178798	0.0213443	0.00231604	0.0791117	0.153164	0.353096	0.000928038	0.150713	0.0581318	0.187745	0.000186994	0.0191913	0.0692576	0.000176972	0.00242485	0.0322995	0.016665	0.00650813	0.00460905
12	0.0124873	0.0209179	0.857828	0.11265	0.162584	0.188476	0.124326	0.220148	7.85803e-06	0.965303	0.308158	10.5301	0.37623	0.0555372	0.980402	0.163471	0.365916	0.576815	0.000382411	0.295343	0.0324474	0.293684	0.0052702	0.0464081	0.143461	0.0570422	0.000177841	0.0172045	0.00502843	0.00601231	0.0198054	0.0290468	0.00624582	0.0260227	0.0126788	0.0471664	0.199069	0.0530789	0.0023341	0.000180634
13	0.572463	0.0368154	0.25705	3.45758	0.669611	0.211777	0.366725	0.577548	3.37459e-06	0.11228	0.568208	0.37623	18.768	0.223368	2.40793	0.00170684	0.0126346	0.124112	0.00663385	0.00269854	1.13557	0.39291	0.101232	0.0773646	0.556942	0.194162	0.331848	0.0607882	0.0103401	0.00103935	0.0162346	0.0208223	0.00437124	0.077401	0.00958085	4.95275e-05	0.0403673	0.00292695	1.13818e-05	0.0080928
14	0.241575	0.604517	0.258107	0.651611	0.305225	0.0100207	0.0398956	0.533377	0.0474185	0.0672757	0.00406799	0.0555372	0.223368	2.37268	0.030879	0.152574	0.094855	0.000868088	0.0892099	0.0386768	0.0116216	0.0753042	0.546222	0.0277425	0.00239822	0.0767336	0.00158304	0.0426938	0.0112174	0.00253061	0.165597	0.00051006	0.00653269	0.000313822	3.88274e-05	0.0235352	0.000558874	0.00231931	0.00189949	0.00118542
15	0.00554239	0.0106536	1.07715	0.270108	0.889649	0.510884	0.0660663	0.146049	0.598607	0.0123655	0.0235788	0.980402	2.40793	0.030879	15.9303	0.061228	0.0247959	0.846124	0.017988	1.54923	0.0209413	0.416622	0.0261837	0.111439	0.0117045	0.417656	0.104074	0.159682	0.396477	0.0800767	0.819625	0.0447188	0.0518518	0.118996	0.00563014	0.118266	0.225963	0.0676439	0.020272	0.00863598
16	0.0201123	0.143615	0.00776296	0.116939	0.0304179	0.194679	1.46242	0.00887571	0.444442	0.0958266	0.0211011	0.163471	0.00170684	0.152574	0.061228	3.21137	0.00930287	0.480661	0.0768244	1.36584e-05	0.0828174	0.0119589	0.0781472	0.146986	0.0130467	0.26373	0.0554974	0.000241029	0.0506643	0.0423714	0.234093	0.0130322	0.00165297	0.00175009	0.0301796	0.0471491	0.00973107	0.00479078	0.00484881	0.00557412
17	0.0954242	0.890076	0.0726773	0.016896	0.0172835	0.124738	0.0709984	0.0600623	0.00718065	0.00394936	0.238929	0.365916	0.0126346	0.094855	0.0247959	0.00930287	5.40271	0.913898	0.182099	0.327902	0.967016	0.556047	0.893181	0.151782	0.00895898	0.378845	0.0460615	0.19109	0.00773003	0.0520133	0.129194	0.0121042	0.0276327	0.0393679	0.0157624	0.0963817	0.0227447	0.0138852	2.40816e-05	4.05769e-05
18	0.529012	0.41287	0.180027	0.0877126	0.476319	0.0839225	0.0691286	0.032264	0.2557	0.000115704	0.325339	0.576815	0.124112	0.000868088	0.846124	0.480661	0.913898	14.244	0.914964	0.00948251	0.0266515	0.245187	0.140762	0.219313	0.199053	0.0910839	0.0782964	0.0659897	0.000700348	0.170554	0.0396106	0.00838805	0.0149447	0.188499	0.365898	0.00124808	0.173988	0.00162149	0.0126196	0.00174223
19	0.00428905	0.0679513	0.00513262	0.00553761	0.0249333	0.018219	0.0005411	0.0774628	0.362338	0.00843532	0.288055	0.000382411	0.00663385	0.0892099	0.017988	0.0768244	0.182099	0.914964	2.65316	0.000283288	0.107611	0.0229174	0.00848339	0.108952	0.0127547	0.16179	0.0163797	0.0659385	0.0326363	0.00747494	0.0038848	0.0261604	0.000174857	0.048946	0.0207279	3.6669e-05	0.00468246	0.00391727	0.00237259	0.000857904
20	0.891323	0.310821	0.113044	0.00219151	0.351636	0.18548	0.000738224	0.0387501	0.000489395	0.0251354	0.13485	0.295343	0.00269854	0.0386768	1.54923	1.36584e-05	0.327902	0.00948251	0.000283288	10.7168	0.00775406	0.155138	0.0174961	0.0322303	0.0259868	0.00234845	0.160935	0.312736	0.051737	4.47117e-05	0.693056	0.0396885	0.0519254	0.894998	0.181753	0.21432	0.00111364	0.216901	0.0286092	0.0881852
21	0.163715	0.234898	0.0143982	0.100436	0.0329655	0.095871	0.0471572	0.00697286	0.202006	0.0651967	1.25311	0.0324474	1.13557	0.0116216	0.0209413	0.0828174	0.967016	0.0266515	0.107611	0.00775406	4.937	0.0905343	0.00396499	0.0881462	0.342266	0.0587519	0.0459647	0.0993982	0.00436109	0.266933	0.38036	0.0180572	0.00969664	0.0136021	0.0134016	0.0559296	0.0403643	0.0008772	0.0066343	0.00374544
22	0.027018	0.0372993	0.107051	0.0249189	0.381454	0.302485	2.21402e-05	0.00105521	0.10313	0.00152554	0.178798	0.293684	0.39291	0.0753042	0.416622	0.0119589	0.556047	0.245187	0.0229174	0.155138	0.0905343	3.49252	0.00346485	4.1105e-05	0.0210223	0.00483382	0.00100683	0.367849	0.0424997	0.00634023	0.0955639	0.00209095	1.87765e-06	4.77887e-05	0.000499001	0.000973933	0.00187234	0.000322645	4.54516e-06	0.000590976
23	0.00270765	2.22654	0.00881038	0.464208	0.0160104	0.362374	2.84893e-05	0.146901	0.00998422	0.240328	0.0213443	0.0052702	0.101232	0.546222	0.0261837	0.0781472	0.893181	0.140762	0.00848339	0.0174961	0.00396499	0.00346485	7.23716	0.0372336	9.19621e-05	0.0914227	0.0359568	0.0401933	0.0037046	0.00346636	0.185187	0.0545397	0.0984004	0.133428	0.0590159	0.0705787	0.0320207	0.000151231	0.00956458	0.00385268
24	0.0501167	0.0983685	0.0513659	0.189212	0.00271475	0.130195	0.038471	0.00797336	0.0778997	0.0635654	0.00231604	0.0464081	0.0773646	0.0277425	0.111439	0.146986	0.151782	0.219313	0.108952	0.0322303	0.0881462	4.1105e-05	0.0372336	1.89522	0.0466249	0.0398194	0.17157	0.00139571	0.0377021	0.00883408	0.00423782	2.24085e-05	0.0136902	0.00350652	0.0207473	0.0653799	0.00441084	0.017964	0.0604293	0.0182358
25	0.0786949	0.0439495	0.0868495	0.107196	0.117769	0.0862813	0.00307388	0.0404433	0.10532	0.0659412	0.0791117	0.143461	0.556942	0.00239822	0.0117045	0.0130467	0.00895898	0.199053	0.0127547	0.0259868	0.342266	0.0210223	9.19621e-05	0.0466249	1.00047	0.0181581	0.0306107	4.88653e-05	0.00347262	0.0356161	0.0463961	0.000703869	0.0095547	0.223978	0.0706922	0.0729627	0.106654	0.011673	0.0132314	0.0188431
26	0.352371	0.0399527	0.345052	0.0104104	0.174807	4.04872e-05	0.519826	0.000900388	0.0228286	0.328333	0.153164	0.0570422	0.194162	0.0767336	0.417656	0.26373	0.378845	0.0910839	0.16179	0.00234845	0.0587519	0.00483382	0.0914227	0.0398194	0.0181581	2.05227	0.0466455	0.154185	0.117914	0.0758672	0.286018	0.0002615	0.00212298	0.00397262	0.0145694	0.0240613	0.0161482	0.00404825	0.00165894	0.00388004
27	0.0216708	0.11715	0.177222	0.0576971	0.148132	0.0955779	0.273143	0.0254014	0.000253195	0.0182796	0.353096	0.000177841	0.331848	0.00158304	0.104074	0.0554974	0.0460615	0.0782964	0.0163797	0.160935	0.0459647	0.00100683	0.0359568	0.17157	0.0306107	0.0466455	1.63807	0.0325121	0.000370284	0.004541	0.0479089	0.000108997	0.0421442	0.19394	0.0206839	0.180249	0.00971356	0.0144798	0.0232708	0.0168351
28	0.0167776	0.033166	0.0355582	0.00236311	0.0585489	0.0668029	0.177426	1.37446e-05	0.0290213	0.10693	0.000928038	0.0172045	0.0607882	0.0426938	0.159682	0.000241029	0.19109	0.0659897	0.0659385	0.312736	0.0993982	0.367849	0.0401933	0.00139571	4.88653e-05	0.154185	0.0325121	0.567604	3.99374e-06	0.000488226	0.0384485	0.0493296	0.0129953	0.0230085	0.0155232	0.0104846	0.000434897	0.0490008	0.00264277	0.00881909
29	0.00730271	0.0483214	0.991237	0.02261	0.00030797	0.175299	0.0110538	0.086976	0.256737	0.183387	0.150713	0.00502843	0.0103401	0.0112174	0.396477	0.0506643	0.00773003	0.000700348	0.0326363	0.051737	0.00436109	0.0424997	0.0037046	0.0377021	0.00347262	0.117914	0.000370284	3.99374e-06	0.918069	0.00368833	0.114645	0.0508858	0.152535	0.0134509	0.0543018	0.00212409	0.0234959	0.0745545	0.00179405	0.00646738
30	0.0407003	0.0376998	0.00295195	0.0041106	0.00467756	2.30699e-05	0.0322811	0.0160371	0.0238952	0.0243149	0.0581318	0.00601231	0.00103935	0.00253061	0.0800767	0.0423714	0.0520133	0.170554	0.00747494	4.47117e-05	0.266933	0.00634023	0.00346636	0.00883408	0.0356161	0.0758672	0.004541	0.000488226	0.00368833	0.335448	0.444584	0.0448782	0.00177383	0.00523964	0.0491178	0.00150893	0.0265157	0.00231856	0.0122722	1.88356e-05
31	0.0204751	0.376926	0.153776	0.00314139	0.499215	0.0134232	0.00175435	0.0553755	0.246779	0.0635879	0.187745	0.0198054	0.0162346	0.165597	0.819625	0.234093	0.129194	0.0396106	0.0038848	0.693056	0.38036	0.0955639	0.185187	0.00423782	0.0463961	0.286018	0.0479089	0.0384485	0.114645	0.444584	3.80557	0.0540859	0.030143	0.210874	5.04512e-05	0.0263976	0.000109003	0.00411316	0.0211672	0.00273948
32	0.00059875	0.0214772	0.0185737	0.00085632	0.00324972	0.0435948	3.81367e-07	0.00836248	0.000116934	0.00315868	0.000186994	0.0290468	0.0208223	0.00051006	0.0447188	0.0130322	0.0121042	0.00838805	0.0261604	0.0396885	0.0180572	0.00209095	0.0545397	2.24085e-05	0.000703869	0.0002615	0.000108997	0.0493296	0.0508858	0.0448782	0.0540859	0.150279	0.0411302	0.00737222	0.053228	0.036369	0.0239574	0.0657408	0.00428381	0.00609649
33	0.0321875	0.233362	0.0514056	0.0327074	0.000624607	0.0193755	0.00136982	0.0519065	0.0944377	0.00976302	0.0191913	0.00624582	0.00437124	0.00653269	0.0518518	0.00165297	0.0276327	0.0149447	0.000174857	0.0519254	0.00969664	1.87765e-06	0.0984004	0.0136902	0.0095547	0.00212298	0.0421442	0.0129953	0.152535	0.00177383	0.030143	0.0411302	0.16603	0.0197985	0.00285003	0.118841	0.0602176	0.0337665	0.0200301	0.000113849
34	0.0109845	0.463874	0.115933	1.69869e-06	0.0960793	0.0105757	0.032486	0.0415348	0.00276346	0.0567082	0.0692576	0.0260227	0.077401	0.000313822	0.118996	0.00175009	0.0393679	0.188499	0.048946	0.894998	0.0136021	4.77887e-05	0.133428	0.00350652	0.223978	0.00397262	0.19394	0.0230085	0.0134509	0.00523964	0.210874	0.00737222	0.0197985	0.743134	0.218384	0.279037	0.0862106	0.0400855	0.0296109	0.0500864
35	9.6833e-06	0.0318407	0.184129	0.00368071	0.00520533	0.0478812	0.0035717	0.0364719	0.0171882	0.00791614	0.000176972	0.0126788	0.00958085	3.88274e-05	0.00563014	0.0301796	0.0157624	0.365898	0.0207279	0.181753	0.0134016	0.000499001	0.0590159	0.0207473	0.0706922	0.0145694	0.0206839	0.0155232	0.0543018	0.0491178	5.04512e-05	0.053228	0.00285003	0.218384	0.262272	0.00430192	0.0107879	0.0603043	0.000972451	0.0179319
36	0.00035765	0.383734	0.025954	0.00419134	0.0033775	4.82908e-07	0.0618232	0.0336672	0.0732957	0.238032	0.00242485	0.0471664	4.95275e-05	0.0235352	0.118266	0.0471491	0.0963817	0.00124808	3.6669e-05	0.21432	0.0559296	0.000973933	0.0705787	0.0653799	0.0729627	0.0240613	0.180249	0.0104846	0.00212409	0.00150893	0.0263976	0.036369	0.118841	0.279037	0.00430192	0.525096	0.0925586	0.00327857	0.065741	0.0175192
37	0.00410973	0.0194291	0.00131904	0.0100111	0.0441117	0.0190423	0.00414667	0.0852862	0.0345236	0.0801909	0.0322995	0.199069	0.0403673	0.000558874	0.225963	0.00973107	0.0227447	0.173988	0.00468246	0.00111364	0.0403643	0.00187234	0.0320207	0.00441084	0.106654	0.0161482	0.00971356	0.000434897	0.0234959	0.0265157	0.000109003	0.0239574	0.0602176	0.0862106	0.0107879	0.0925586	0.337847	0.0678274	0.00387619	2.25e-06
38	0.00096788	0.0299903	0.0679005	0.000510841	0.0123335	0.0366394	0.00331491	0.00641203	0.0524856	0.00462165	0.016665	0.0530789	0.00292695	0.00231931	0.0676439	0.00479078	0.0138852	0.00162149	0.00391727	0.216901	0.0008772	0.000322645	0.000151231	0.017964	0.011673	0.00404825	0.0144798	0.0490008	0.0745545	0.00231856	0.00411316	0.0657408	0.0337665	0.0400855	0.0603043	0.00327857	0.0678274	0.169004	0.000784719	0.0238579
39	0.00144266	0.149393	0.000977493	0.00738781	0.00155914	0.000850885	0.000255864	3.61011e-06	0.0029888	0.00641913	0.00650813	0.0023341	1.13818e-05	0.00189949	0.020272	0.00484881	2.40816e-05	0.0126196	0.00237259	0.0286092	0.0066343	4.54516e-06	0.00956458	0.0604293	0.0132314	0.00165894	0.0232708	0.00264277	0.00179405	0.0122722	0.0211672	0.00428381	0.0200301	0.0296109	0.000972451	0.065741	0.00387619	0.000784719	0.0236191	0.00536849
40	0.000785681	0.0513068	0.0120604	0.000230432	0.00152959	0.00334084	0.000373262	0.00044521	0.00112359	0.0042328	0.00460905	0.000180634	0.0080928	0.00118542	0.00863598	0.00557412	4.05769e-05	0.00174223	0.000857904	0.0881852	0.00374544	0.000590976	0.00385268	0.0182358	0.0188431	0.00388004	0.0168351	0.00881909	0.00646738	1.88356e-05	0.00273948	0.00609649	0.000113849	0.0500864	0.0179319	0.0175192	2.25e-06	0.0238579	0.00536849	0.01
