# Supplementary material for: Improved GNSS integer ambiguity resolution method based on the column oriented Cholesky decomposition
Source: Research Square preprint supplement (doi:10.21203/rs.3.rs-2360038/v1), 2022-12-20
Supplement: Supplementary file 5 [file Figure 3-simulation3.xlsx]

## Sheet: Sheet1
Floating point solution a	130.331	-82.1261	-104.506	18.2593	-67.5083
Floating point solution a	130.331	-82.1261	-104.506	18.2593	-67.5083	224.523
Floating point solution a	130.331	-82.1261	-104.506	18.2593	-67.5083	224.523	10.6306
Floating point solution a	130.331	-82.1261	-104.506	18.2593	-67.5083	224.523	10.6306	131.873
Floating point solution a	130.331	-82.1261	-104.506	18.2593	-67.5083	224.523	10.6306	131.873	21.5575
Floating point solution a	130.331	-82.1261	-104.506	18.2593	-67.5083	224.523	10.6306	131.873	21.5575	88.5844
Floating point solution a	130.331	-82.1261	-104.506	18.2593	-67.5083	224.523	10.6306	131.873	21.5575	88.5844	201.085
Floating point solution a	130.331	-82.1261	-104.506	18.2593	-67.5083	224.523	10.6306	131.873	21.5575	88.5844	201.085	-2.8455
Floating point solution a	130.331	-82.1261	-104.506	18.2593	-67.5083	224.523	10.6306	131.873	21.5575	88.5844	201.085	-2.8455	63.5165
Floating point solution a	130.331	-82.1261	-104.506	18.2593	-67.5083	224.523	10.6306	131.873	21.5575	88.5844	201.085	-2.8455	63.5165	68.8538
Floating point solution a	130.331	-82.1261	-104.506	18.2593	-67.5083	224.523	10.6306	131.873	21.5575	88.5844	201.085	-2.8455	63.5165	68.8538	127.597
Floating point solution a	130.331	-82.1261	-104.506	18.2593	-67.5083	224.523	10.6306	131.873	21.5575	88.5844	201.085	-2.8455	63.5165	68.8538	127.597	26.5142
Floating point solution a	130.331	-82.1261	-104.506	18.2593	-67.5083	224.523	10.6306	131.873	21.5575	88.5844	201.085	-2.8455	63.5165	68.8538	127.597	26.5142	-106.641
Floating point solution a	130.331	-82.1261	-104.506	18.2593	-67.5083	224.523	10.6306	131.873	21.5575	88.5844	201.085	-2.8455	63.5165	68.8538	127.597	26.5142	-106.641	78.0602
Floating point solution a	130.331	-82.1261	-104.506	18.2593	-67.5083	224.523	10.6306	131.873	21.5575	88.5844	201.085	-2.8455	63.5165	68.8538	127.597	26.5142	-106.641	78.0602	-122.588
Floating point solution a	130.331	-82.1261	-104.506	18.2593	-67.5083	224.523	10.6306	131.873	21.5575	88.5844	201.085	-2.8455	63.5165	68.8538	127.597	26.5142	-106.641	78.0602	-122.588	34.9073
Floating point solution a	130.331	-82.1261	-104.506	18.2593	-67.5083	224.523	10.6306	131.873	21.5575	88.5844	201.085	-2.8455	63.5165	68.8538	127.597	26.5142	-106.641	78.0602	-122.588	34.9073	-12.3672
Floating point solution a	130.331	-82.1261	-104.506	18.2593	-67.5083	224.523	10.6306	131.873	21.5575	88.5844	201.085	-2.8455	63.5165	68.8538	127.597	26.5142	-106.641	78.0602	-122.588	34.9073	-12.3672	75.1373
Floating point solution a	130.331	-82.1261	-104.506	18.2593	-67.5083	224.523	10.6306	131.873	21.5575	88.5844	201.085	-2.8455	63.5165	68.8538	127.597	26.5142	-106.641	78.0602	-122.588	34.9073	-12.3672	75.1373	101.628
Floating point solution a	130.331	-82.1261	-104.506	18.2593	-67.5083	224.523	10.6306	131.873	21.5575	88.5844	201.085	-2.8455	63.5165	68.8538	127.597	26.5142	-106.641	78.0602	-122.588	34.9073	-12.3672	75.1373	101.628	-57.3793
Floating point solution a	130.331	-82.1261	-104.506	18.2593	-67.5083	224.523	10.6306	131.873	21.5575	88.5844	201.085	-2.8455	63.5165	68.8538	127.597	26.5142	-106.641	78.0602	-122.588	34.9073	-12.3672	75.1373	101.628	-57.3793	-23.3895
Floating point solution a	130.331	-82.1261	-104.506	18.2593	-67.5083	224.523	10.6306	131.873	21.5575	88.5844	201.085	-2.8455	63.5165	68.8538	127.597	26.5142	-106.641	78.0602	-122.588	34.9073	-12.3672	75.1373	101.628	-57.3793	-23.3895	43.6551
Floating point solution a	130.331	-82.1261	-104.506	18.2593	-67.5083	224.523	10.6306	131.873	21.5575	88.5844	201.085	-2.8455	63.5165	68.8538	127.597	26.5142	-106.641	78.0602	-122.588	34.9073	-12.3672	75.1373	101.628	-57.3793	-23.3895	43.6551	-67.5227
Floating point solution a	130.331	-82.1261	-104.506	18.2593	-67.5083	224.523	10.6306	131.873	21.5575	88.5844	201.085	-2.8455	63.5165	68.8538	127.597	26.5142	-106.641	78.0602	-122.588	34.9073	-12.3672	75.1373	101.628	-57.3793	-23.3895	43.6551	-67.5227	80.2545
Floating point solution a	130.331	-82.1261	-104.506	18.2593	-67.5083	224.523	10.6306	131.873	21.5575	88.5844	201.085	-2.8455	63.5165	68.8538	127.597	26.5142	-106.641	78.0602	-122.588	34.9073	-12.3672	75.1373	101.628	-57.3793	-23.3895	43.6551	-67.5227	80.2545	-31.2372
Floating point solution a	130.331	-82.1261	-104.506	18.2593	-67.5083	224.523	10.6306	131.873	21.5575	88.5844	201.085	-2.8455	63.5165	68.8538	127.597	26.5142	-106.641	78.0602	-122.588	34.9073	-12.3672	75.1373	101.628	-57.3793	-23.3895	43.6551	-67.5227	80.2545	-31.2372	-4.2215
Floating point solution a	130.331	-82.1261	-104.506	18.2593	-67.5083	224.523	10.6306	131.873	21.5575	88.5844	201.085	-2.8455	63.5165	68.8538	127.597	26.5142	-106.641	78.0602	-122.588	34.9073	-12.3672	75.1373	101.628	-57.3793	-23.3895	43.6551	-67.5227	80.2545	-31.2372	-4.2215	25.7881
Floating point solution a	130.331	-82.1261	-104.506	18.2593	-67.5083	224.523	10.6306	131.873	21.5575	88.5844	201.085	-2.8455	63.5165	68.8538	127.597	26.5142	-106.641	78.0602	-122.588	34.9073	-12.3672	75.1373	101.628	-57.3793	-23.3895	43.6551	-67.5227	80.2545	-31.2372	-4.2215	25.7881	-25.3744
Floating point solution a	130.331	-82.1261	-104.506	18.2593	-67.5083	224.523	10.6306	131.873	21.5575	88.5844	201.085	-2.8455	63.5165	68.8538	127.597	26.5142	-106.641	78.0602	-122.588	34.9073	-12.3672	75.1373	101.628	-57.3793	-23.3895	43.6551	-67.5227	80.2545	-31.2372	-4.2215	25.7881	-25.3744	-31.2344
Floating point solution a	130.331	-82.1261	-104.506	18.2593	-67.5083	224.523	10.6306	131.873	21.5575	88.5844	201.085	-2.8455	63.5165	68.8538	127.597	26.5142	-106.641	78.0602	-122.588	34.9073	-12.3672	75.1373	101.628	-57.3793	-23.3895	43.6551	-67.5227	80.2545	-31.2372	-4.2215	25.7881	-25.3744	-31.2344	-20.0177
Floating point solution a	130.331	-82.1261	-104.506	18.2593	-67.5083	224.523	10.6306	131.873	21.5575	88.5844	201.085	-2.8455	63.5165	68.8538	127.597	26.5142	-106.641	78.0602	-122.588	34.9073	-12.3672	75.1373	101.628	-57.3793	-23.3895	43.6551	-67.5227	80.2545	-31.2372	-4.2215	25.7881	-25.3744	-31.2344	-20.0177	50.8824
Floating point solution a	130.331	-82.1261	-104.506	18.2593	-67.5083	224.523	10.6306	131.873	21.5575	88.5844	201.085	-2.8455	63.5165	68.8538	127.597	26.5142	-106.641	78.0602	-122.588	34.9073	-12.3672	75.1373	101.628	-57.3793	-23.3895	43.6551	-67.5227	80.2545	-31.2372	-4.2215	25.7881	-25.3744	-31.2344	-20.0177	50.8824	-148.403
Floating point solution a	130.331	-82.1261	-104.506	18.2593	-67.5083	224.523	10.6306	131.873	21.5575	88.5844	201.085	-2.8455	63.5165	68.8538	127.597	26.5142	-106.641	78.0602	-122.588	34.9073	-12.3672	75.1373	101.628	-57.3793	-23.3895	43.6551	-67.5227	80.2545	-31.2372	-4.2215	25.7881	-25.3744	-31.2344	-20.0177	50.8824	-148.403	-93.933
Floating point solution a	130.331	-82.1261	-104.506	18.2593	-67.5083	224.523	10.6306	131.873	21.5575	88.5844	201.085	-2.8455	63.5165	68.8538	127.597	26.5142	-106.641	78.0602	-122.588	34.9073	-12.3672	75.1373	101.628	-57.3793	-23.3895	43.6551	-67.5227	80.2545	-31.2372	-4.2215	25.7881	-25.3744	-31.2344	-20.0177	50.8824	-148.403	-93.933	38.7282
Floating point solution a	130.331	-82.1261	-104.506	18.2593	-67.5083	224.523	10.6306	131.873	21.5575	88.5844	201.085	-2.8455	63.5165	68.8538	127.597	26.5142	-106.641	78.0602	-122.588	34.9073	-12.3672	75.1373	101.628	-57.3793	-23.3895	43.6551	-67.5227	80.2545	-31.2372	-4.2215	25.7881	-25.3744	-31.2344	-20.0177	50.8824	-148.403	-93.933	38.7282	93.2062
Floating point solution a	130.331	-82.1261	-104.506	18.2593	-67.5083	224.523	10.6306	131.873	21.5575	88.5844	201.085	-2.8455	63.5165	68.8538	127.597	26.5142	-106.641	78.0602	-122.588	34.9073	-12.3672	75.1373	101.628	-57.3793	-23.3895	43.6551	-67.5227	80.2545	-31.2372	-4.2215	25.7881	-25.3744	-31.2344	-20.0177	50.8824	-148.403	-93.933	38.7282	93.2062	57.9972
D矩阵	0.7577	0	0	0	0	0	0	0	0	0	0	0	0	0	0	0	0	0	0	0	0	0	0	0	0	0	0	0	0	0	0	0	0	0	0	0	0	0	0	0
2	0	0.7431	0	0	0	0	0	0	0	0	0	0	0	0	0	0	0	0	0	0	0	0	0	0	0	0	0	0	0	0	0	0	0	0	0	0	0	0	0	0
3	0	0	0.3922	0	0	0	0	0	0	0	0	0	0	0	0	0	0	0	0	0	0	0	0	0	0	0	0	0	0	0	0	0	0	0	0	0	0	0	0	0
4	0	0	0	0.6554	0	0	0	0	0	0	0	0	0	0	0	0	0	0	0	0	0	0	0	0	0	0	0	0	0	0	0	0	0	0	0	0	0	0	0	0
5	0	0	0	0	0.1711	0	0	0	0	0	0	0	0	0	0	0	0	0	0	0	0	0	0	0	0	0	0	0	0	0	0	0	0	0	0	0	0	0	0	0
6	0	0	0	0	0	0.706	0	0	0	0	0	0	0	0	0	0	0	0	0	0	0	0	0	0	0	0	0	0	0	0	0	0	0	0	0	0	0	0	0	0
7	0	0	0	0	0	0	0.0318	0	0	0	0	0	0	0	0	0	0	0	0	0	0	0	0	0	0	0	0	0	0	0	0	0	0	0	0	0	0	0	0	0
8	0	0	0	0	0	0	0	0.2769	0	0	0	0	0	0	0	0	0	0	0	0	0	0	0	0	0	0	0	0	0	0	0	0	0	0	0	0	0	0	0	0
9	0	0	0	0	0	0	0	0	0.0461	0	0	0	0	0	0	0	0	0	0	0	0	0	0	0	0	0	0	0	0	0	0	0	0	0	0	0	0	0	0	0
10	0	0	0	0	0	0	0	0	0	0.0971	0	0	0	0	0	0	0	0	0	0	0	0	0	0	0	0	0	0	0	0	0	0	0	0	0	0	0	0	0	0
11	0	0	0	0	0	0	0	0	0	0	0.8234	0	0	0	0	0	0	0	0	0	0	0	0	0	0	0	0	0	0	0	0	0	0	0	0	0	0	0	0	0
12	0	0	0	0	0	0	0	0	0	0	0	0.6948	0	0	0	0	0	0	0	0	0	0	0	0	0	0	0	0	0	0	0	0	0	0	0	0	0	0	0	0
13	0	0	0	0	0	0	0	0	0	0	0	0	0.317	0	0	0	0	0	0	0	0	0	0	0	0	0	0	0	0	0	0	0	0	0	0	0	0	0	0	0
14	0	0	0	0	0	0	0	0	0	0	0	0	0	0.9502	0	0	0	0	0	0	0	0	0	0	0	0	0	0	0	0	0	0	0	0	0	0	0	0	0	0
15	0	0	0	0	0	0	0	0	0	0	0	0	0	0	0.0344	0	0	0	0	0	0	0	0	0	0	0	0	0	0	0	0	0	0	0	0	0	0	0	0	0
16	0	0	0	0	0	0	0	0	0	0	0	0	0	0	0	0.4387	0	0	0	0	0	0	0	0	0	0	0	0	0	0	0	0	0	0	0	0	0	0	0	0
17	0	0	0	0	0	0	0	0	0	0	0	0	0	0	0	0	0.3815	0	0	0	0	0	0	0	0	0	0	0	0	0	0	0	0	0	0	0	0	0	0	0
18	0	0	0	0	0	0	0	0	0	0	0	0	0	0	0	0	0	0.7655	0	0	0	0	0	0	0	0	0	0	0	0	0	0	0	0	0	0	0	0	0	0
19	0	0	0	0	0	0	0	0	0	0	0	0	0	0	0	0	0	0	0.7951	0	0	0	0	0	0	0	0	0	0	0	0	0	0	0	0	0	0	0	0	0
20	0	0	0	0	0	0	0	0	0	0	0	0	0	0	0	0	0	0	0	0.1868	0	0	0	0	0	0	0	0	0	0	0	0	0	0	0	0	0	0	0	0
21	0	0	0	0	0	0	0	0	0	0	0	0	0	0	0	0	0	0	0	0	0.4897	0	0	0	0	0	0	0	0	0	0	0	0	0	0	0	0	0	0	0
22	0	0	0	0	0	0	0	0	0	0	0	0	0	0	0	0	0	0	0	0	0	0.4455	0	0	0	0	0	0	0	0	0	0	0	0	0	0	0	0	0	0
23	0	0	0	0	0	0	0	0	0	0	0	0	0	0	0	0	0	0	0	0	0	0	0.6463	0	0	0	0	0	0	0	0	0	0	0	0	0	0	0	0	0
24	0	0	0	0	0	0	0	0	0	0	0	0	0	0	0	0	0	0	0	0	0	0	0	0.7093	0	0	0	0	0	0	0	0	0	0	0	0	0	0	0	0
25	0	0	0	0	0	0	0	0	0	0	0	0	0	0	0	0	0	0	0	0	0	0	0	0	0.7546	0	0	0	0	0	0	0	0	0	0	0	0	0	0	0
26	0	0	0	0	0	0	0	0	0	0	0	0	0	0	0	0	0	0	0	0	0	0	0	0	0	0.276	0	0	0	0	0	0	0	0	0	0	0	0	0	0
27	0	0	0	0	0	0	0	0	0	0	0	0	0	0	0	0	0	0	0	0	0	0	0	0	0	0	0.6797	0	0	0	0	0	0	0	0	0	0	0	0	0
28	0	0	0	0	0	0	0	0	0	0	0	0	0	0	0	0	0	0	0	0	0	0	0	0	0	0	0	0.655	0	0	0	0	0	0	0	0	0	0	0	0
29	0	0	0	0	0	0	0	0	0	0	0	0	0	0	0	0	0	0	0	0	0	0	0	0	0	0	0	0	0.1626	0	0	0	0	0	0	0	0	0	0	0
30	0	0	0	0	0	0	0	0	0	0	0	0	0	0	0	0	0	0	0	0	0	0	0	0	0	0	0	0	0	0.1189	0	0	0	0	0	0	0	0	0	0
31	0	0	0	0	0	0	0	0	0	0	0	0	0	0	0	0	0	0	0	0	0	0	0	0	0	0	0	0	0	0	0.4983	0	0	0	0	0	0	0	0	0
32	0	0	0	0	0	0	0	0	0	0	0	0	0	0	0	0	0	0	0	0	0	0	0	0	0	0	0	0	0	0	0	0.9597	0	0	0	0	0	0	0	0
33	0	0	0	0	0	0	0	0	0	0	0	0	0	0	0	0	0	0	0	0	0	0	0	0	0	0	0	0	0	0	0	0	0.3403	0	0	0	0	0	0	0
34	0	0	0	0	0	0	0	0	0	0	0	0	0	0	0	0	0	0	0	0	0	0	0	0	0	0	0	0	0	0	0	0	0	0.5852	0	0	0	0	0	0
35	0	0	0	0	0	0	0	0	0	0	0	0	0	0	0	0	0	0	0	0	0	0	0	0	0	0	0	0	0	0	0	0	0	0	0.2238	0	0	0	0	0
36	0	0	0	0	0	0	0	0	0	0	0	0	0	0	0	0	0	0	0	0	0	0	0	0	0	0	0	0	0	0	0	0	0	0	0	0.7512	0	0	0	0
37	0	0	0	0	0	0	0	0	0	0	0	0	0	0	0	0	0	0	0	0	0	0	0	0	0	0	0	0	0	0	0	0	0	0	0	0	0.255	0	0	0
38	0	0	0	0	0	0	0	0	0	0	0	0	0	0	0	0	0	0	0	0	0	0	0	0	0	0	0	0	0	0	0	0	0	0	0	0	0	0.5059	0	0
39	0	0	0	0	0	0	0	0	0	0	0	0	0	0	0	0	0	0	0	0	0	0	0	0	0	0	0	0	0	0	0	0	0	0	0	0	0	0	0.699	0
40	0	0	0	0	0	0	0	0	0	0	0	0	0	0	0	0	0	0	0	0	0	0	0	0	0	0	0	0	0	0	0	0	0	0	0	0	0	0	0	0.8909
-1.5483	-1.6081	-2.3922	-0.2549	0.5771	0	0	0	0	0	0	0	0	0	0	0	0	0	0	0	0	0	0	0	0	0	0	0	0	0	0	0	0	0	0	0	0	0	0	0
0	3.16	0.5679	0.5469	-1.1809	0	0	0	0	0	0	0	0	0	0	0	0	0	0	0	0	0	0	0	0	0	0	0	0	0	0	0	0	0	0	0	0	0	0	0
0	0	1.2273	0.4253	0.8799	0	0	0	0	0	0	0	0	0	0	0	0	0	0	0	0	0	0	0	0	0	0	0	0	0	0	0	0	0	0	0	0	0	0	0
0	0	0	-0.6867	-0.0649	0	0	0	0	0	0	0	0	0	0	0	0	0	0	0	0	0	0	0	0	0	0	0	0	0	0	0	0	0	0	0	0	0	0	0
0	0	0	0	0.5847	0	0	0	0	0	0	0	0	0	0	0	0	0	0	0	0	0	0	0	0	0	0	0	0	0	0	0	0	0	0	0	0	0	0	0
0	0	0	0	0	0	0	0	0	0	0	0	0	0	0	0	0	0	0	0	0	0	0	0	0	0	0	0	0	0	0	0	0	0	0	0	0	0	0	0
0	0	0	0	0	0	0	0	0	0	0	0	0	0	0	0	0	0	0	0	0	0	0	0	0	0	0	0	0	0	0	0	0	0	0	0	0	0	0	0
0	0	0	0	0	0	0	0	0	0	0	0	0	0	0	0	0	0	0	0	0	0	0	0	0	0	0	0	0	0	0	0	0	0	0	0	0	0	0	0
0	0	0	0	0	0	0	0	0	0	0	0	0	0	0	0	0	0	0	0	0	0	0	0	0	0	0	0	0	0	0	0	0	0	0	0	0	0	0	0
0	0	0	0	0	0	0	0	0	0	0	0	0	0	0	0	0	0	0	0	0	0	0	0	0	0	0	0	0	0	0	0	0	0	0	0	0	0	0	0
1.72181	-0.714628	-0.448253	1.48538	-0.0718034	0.977028	0	0	0	0	0	0	0	0	0	0	0	0	0	0	0	0	0	0	0	0	0	0	0	0	0	0	0	0	0	0	0	0	0	0
0	2.41563	1.25287	-0.0877193	-0.700531	0.0729871	0	0	0	0	0	0	0	0	0	0	0	0	0	0	0	0	0	0	0	0	0	0	0	0	0	0	0	0	0	0	0	0	0	0
0	0	-1.66259	-1.02484	0.300073	-0.190063	0	0	0	0	0	0	0	0	0	0	0	0	0	0	0	0	0	0	0	0	0	0	0	0	0	0	0	0	0	0	0	0	0	0
0	0	0	-1.94216	0.342579	0.024811	0	0	0	0	0	0	0	0	0	0	0	0	0	0	0	0	0	0	0	0	0	0	0	0	0	0	0	0	0	0	0	0	0	0
0	0	0	0	2.72418	-1.11238	0	0	0	0	0	0	0	0	0	0	0	0	0	0	0	0	0	0	0	0	0	0	0	0	0	0	0	0	0	0	0	0	0	0
0	0	0	0	0	1.70906	0	0	0	0	0	0	0	0	0	0	0	0	0	0	0	0	0	0	0	0	0	0	0	0	0	0	0	0	0	0	0	0	0	0
0	0	0	0	0	0	0	0	0	0	0	0	0	0	0	0	0	0	0	0	0	0	0	0	0	0	0	0	0	0	0	0	0	0	0	0	0	0	0	0
-3.48716	-1.17916	-0.390114	0.547519	0.530752	-0.58843	-1.05478	0	0	0	0	0	0	0	0	0	0	0	0	0	0	0	0	0	0	0	0	0	0	0	0	0	0	0	0	0	0	0	0	0
0	2.67206	0.755985	0.053483	1.11532	-0.316407	-0.523759	0	0	0	0	0	0	0	0	0	0	0	0	0	0	0	0	0	0	0	0	0	0	0	0	0	0	0	0	0	0	0	0	0
0	0	2.80499	0.118594	-1.91763	0.731017	-0.572251	0	0	0	0	0	0	0	0	0	0	0	0	0	0	0	0	0	0	0	0	0	0	0	0	0	0	0	0	0	0	0	0	0
0	0	0	-1.74916	-0.556775	-1.07429	-0.720472	0	0	0	0	0	0	0	0	0	0	0	0	0	0	0	0	0	0	0	0	0	0	0	0	0	0	0	0	0	0	0	0	0
0	0	0	0	-2.73954	1.68145	-0.786586	0	0	0	0	0	0	0	0	0	0	0	0	0	0	0	0	0	0	0	0	0	0	0	0	0	0	0	0	0	0	0	0	0
0	0	0	0	0	1.29704	-0.0240614	0	0	0	0	0	0	0	0	0	0	0	0	0	0	0	0	0	0	0	0	0	0	0	0	0	0	0	0	0	0	0	0	0
0	0	0	0	0	0	1.50016	0	0	0	0	0	0	0	0	0	0	0	0	0	0	0	0	0	0	0	0	0	0	0	0	0	0	0	0	0	0	0	0	0
0	0	0	0	0	0	0	0	0	0	0	0	0	0	0	0	0	0	0	0	0	0	0	0	0	0	0	0	0	0	0	0	0	0	0	0	0	0	0	0
2.19785	0.021647	0.30098	0.199834	-0.633069	0.149726	0.275799	0.866207	0	0	0	0	0	0	0	0	0	0	0	0	0	0	0	0	0	0	0	0	0	0	0	0	0	0	0	0	0	0	0	0
0	-3.00622	-0.546059	-0.559781	0.686808	-0.670142	0.641907	0.120098	0	0	0	0	0	0	0	0	0	0	0	0	0	0	0	0	0	0	0	0	0	0	0	0	0	0	0	0	0	0	0	0
0	0	-2.02453	0.727985	-1.32606	-0.307562	0.674284	-0.234177	0	0	0	0	0	0	0	0	0	0	0	0	0	0	0	0	0	0	0	0	0	0	0	0	0	0	0	0	0	0	0	0
0	0	0	2.37793	-0.263264	-0.524984	0.00826742	-0.891536	0	0	0	0	0	0	0	0	0	0	0	0	0	0	0	0	0	0	0	0	0	0	0	0	0	0	0	0	0	0	0	0
0	0	0	0	-1.64186	-0.243647	-0.498412	1.29323	0	0	0	0	0	0	0	0	0	0	0	0	0	0	0	0	0	0	0	0	0	0	0	0	0	0	0	0	0	0	0	0
0	0	0	0	0	-1.4382	0.502436	-1.00616	0	0	0	0	0	0	0	0	0	0	0	0	0	0	0	0	0	0	0	0	0	0	0	0	0	0	0	0	0	0	0	0
0	0	0	0	0	0	1.31646	-0.231247	0	0	0	0	0	0	0	0	0	0	0	0	0	0	0	0	0	0	0	0	0	0	0	0	0	0	0	0	0	0	0	0
0	0	0	0	0	0	0	0.311969	0	0	0	0	0	0	0	0	0	0	0	0	0	0	0	0	0	0	0	0	0	0	0	0	0	0	0	0	0	0	0	0
0	0	0	0	0	0	0	0	0	0	0	0	0	0	0	0	0	0	0	0	0	0	0	0	0	0	0	0	0	0	0	0	0	0	0	0	0	0	0	0
-3.43929	-0.0675701	-1.80845	-0.158502	-0.220434	-1.11234	0.393422	-0.492611	0.247056	0	0	0	0	0	0	0	0	0	0	0	0	0	0	0	0	0	0	0	0	0	0	0	0	0	0	0	0	0	0	0
0	4.74302	1.14725	2.5216	0.509077	0.962602	-0.508096	0.253091	-1.50863	0	0	0	0	0	0	0	0	0	0	0	0	0	0	0	0	0	0	0	0	0	0	0	0	0	0	0	0	0	0	0
0	0	3.63468	0.846923	-0.335989	1.43341	-1.62081	0.835646	0.304187	0	0	0	0	0	0	0	0	0	0	0	0	0	0	0	0	0	0	0	0	0	0	0	0	0	0	0	0	0	0	0
0	0	0	-2.39562	-0.172265	0.505301	0.87203	-0.149325	0.0942558	0	0	0	0	0	0	0	0	0	0	0	0	0	0	0	0	0	0	0	0	0	0	0	0	0	0	0	0	0	0	0
0	0	0	0	-2.88955	0.828657	-1.01785	-0.0819762	-0.253006	0	0	0	0	0	0	0	0	0	0	0	0	0	0	0	0	0	0	0	0	0	0	0	0	0	0	0	0	0	0	0
0	0	0	0	0	2.54669	0.819775	-0.198946	0.139983	0	0	0	0	0	0	0	0	0	0	0	0	0	0	0	0	0	0	0	0	0	0	0	0	0	0	0	0	0	0	0
0	0	0	0	0	0	-2.34046	0.857831	0.37117	0	0	0	0	0	0	0	0	0	0	0	0	0	0	0	0	0	0	0	0	0	0	0	0	0	0	0	0	0	0	0
0	0	0	0	0	0	0	1.03908	0.843611	0	0	0	0	0	0	0	0	0	0	0	0	0	0	0	0	0	0	0	0	0	0	0	0	0	0	0	0	0	0	0
0	0	0	0	0	0	0	0	-0.307718	0	0	0	0	0	0	0	0	0	0	0	0	0	0	0	0	0	0	0	0	0	0	0	0	0	0	0	0	0	0	0
0	0	0	0	0	0	0	0	0	0	0	0	0	0	0	0	0	0	0	0	0	0	0	0	0	0	0	0	0	0	0	0	0	0	0	0	0	0	0	0
-3.31566	-1.14696	-0.208102	-0.624611	0.350333	-0.455057	-1.68707	-0.283344	0.299356	-0.995185	0	0	0	0	0	0	0	0	0	0	0	0	0	0	0	0	0	0	0	0	0	0	0	0	0	0	0	0	0	0
0	-3.32166	0.0598245	0.388775	0.168745	0.662613	-0.832465	-0.241137	0.0844429	0.189595	0	0	0	0	0	0	0	0	0	0	0	0	0	0	0	0	0	0	0	0	0	0	0	0	0	0	0	0	0	0
0	0	3.1177	0.531668	-0.0946008	0.619925	-1.32735	1.74857	0.0367647	-1.1457	0	0	0	0	0	0	0	0	0	0	0	0	0	0	0	0	0	0	0	0	0	0	0	0	0	0	0	0	0	0
0	0	0	1.34951	-0.304427	-0.169995	1.08805	0.250008	-0.545384	0.116591	0	0	0	0	0	0	0	0	0	0	0	0	0	0	0	0	0	0	0	0	0	0	0	0	0	0	0	0	0	0
0	0	0	0	-1.76629	0.423035	-0.113981	-0.495935	0.711673	1.49744	0	0	0	0	0	0	0	0	0	0	0	0	0	0	0	0	0	0	0	0	0	0	0	0	0	0	0	0	0	0
0	0	0	0	0	-1.07357	-2.18424	-0.0710812	-1.87744	0.180311	0	0	0	0	0	0	0	0	0	0	0	0	0	0	0	0	0	0	0	0	0	0	0	0	0	0	0	0	0	0
0	0	0	0	0	0	-1.60576	0.183537	0.639715	0.66713	0	0	0	0	0	0	0	0	0	0	0	0	0	0	0	0	0	0	0	0	0	0	0	0	0	0	0	0	0	0
0	0	0	0	0	0	0	-2.28131	-0.19162	0.206574	0	0	0	0	0	0	0	0	0	0	0	0	0	0	0	0	0	0	0	0	0	0	0	0	0	0	0	0	0	0
0	0	0	0	0	0	0	0	1.34001	-1.13559	0	0	0	0	0	0	0	0	0	0	0	0	0	0	0	0	0	0	0	0	0	0	0	0	0	0	0	0	0	0
0	0	0	0	0	0	0	0	0	0.756279	0	0	0	0	0	0	0	0	0	0	0	0	0	0	0	0	0	0	0	0	0	0	0	0	0	0	0	0	0	0
0	0	0	0	0	0	0	0	0	0	0	0	0	0	0	0	0	0	0	0	0	0	0	0	0	0	0	0	0	0	0	0	0	0	0	0	0	0	0	0
-2.37555	0.719331	-0.34669	0.411454	-0.518756	0.483285	1.32583	0.686804	0.400768	0.24457	0.85468	0	0	0	0	0	0	0	0	0	0	0	0	0	0	0	0	0	0	0	0	0	0	0	0	0	0	0	0	0
0	-3.02199	-0.094824	-0.220548	1.10652	0.276246	-0.484433	0.335246	0.396333	0.677872	0.428173	0	0	0	0	0	0	0	0	0	0	0	0	0	0	0	0	0	0	0	0	0	0	0	0	0	0	0	0	0
0	0	2.43644	-0.607186	0.482498	-0.0809759	1.2448	-0.992599	0.582909	-1.49853	0.18452	0	0	0	0	0	0	0	0	0	0	0	0	0	0	0	0	0	0	0	0	0	0	0	0	0	0	0	0	0
0	0	0	1.74768	0.102481	0.836828	-0.897638	3.2253	-0.606302	-0.589128	-0.377934	0	0	0	0	0	0	0	0	0	0	0	0	0	0	0	0	0	0	0	0	0	0	0	0	0	0	0	0	0
0	0	0	0	2.89802	-0.349524	0.252878	0.602363	-0.291308	0.228509	0.0831131	0	0	0	0	0	0	0	0	0	0	0	0	0	0	0	0	0	0	0	0	0	0	0	0	0	0	0	0	0
0	0	0	0	0	2.06308	-0.0593723	0.777208	0.112092	-0.0731602	1.35561	0	0	0	0	0	0	0	0	0	0	0	0	0	0	0	0	0	0	0	0	0	0	0	0	0	0	0	0	0
0	0	0	0	0	0	3.27831	0.346449	1.60471	-1.26719	1.72145	0	0	0	0	0	0	0	0	0	0	0	0	0	0	0	0	0	0	0	0	0	0	0	0	0	0	0	0	0
0	0	0	0	0	0	0	1.32502	-0.267009	-0.423332	-0.198751	0	0	0	0	0	0	0	0	0	0	0	0	0	0	0	0	0	0	0	0	0	0	0	0	0	0	0	0	0
0	0	0	0	0	0	0	0	-1.047	-1.66889	-0.0373612	0	0	0	0	0	0	0	0	0	0	0	0	0	0	0	0	0	0	0	0	0	0	0	0	0	0	0	0	0
0	0	0	0	0	0	0	0	0	-0.339386	0.0847109	0	0	0	0	0	0	0	0	0	0	0	0	0	0	0	0	0	0	0	0	0	0	0	0	0	0	0	0	0
0	0	0	0	0	0	0	0	0	0	0.785736	0	0	0	0	0	0	0	0	0	0	0	0	0	0	0	0	0	0	0	0	0	0	0	0	0	0	0	0	0
0	0	0	0	0	0	0	0	0	0	0	0	0	0	0	0	0	0	0	0	0	0	0	0	0	0	0	0	0	0	0	0	0	0	0	0	0	0	0	0
3.37793	1.00459	-0.481576	0.360816	-0.0830426	1.21962	0.269288	-2.20878	1.83454	0.393366	0.18542	0.307643	0	0	0	0	0	0	0	0	0	0	0	0	0	0	0	0	0	0	0	0	0	0	0	0	0	0	0	0
0	2.34008	-0.309595	0.00864545	0.304541	-0.117265	-0.556784	0.81784	1.45949	1.16726	-0.583288	1.49813	0	0	0	0	0	0	0	0	0	0	0	0	0	0	0	0	0	0	0	0	0	0	0	0	0	0	0	0
0	0	3.4682	-1.37962	0.742632	-0.917288	0.146822	1.83098	-0.193067	-0.588789	1.23731	0.888143	0	0	0	0	0	0	0	0	0	0	0	0	0	0	0	0	0	0	0	0	0	0	0	0	0	0	0	0
0	0	0	-2.51457	-1.19043	0.749247	-0.638541	-0.44698	-1.16722	-0.914337	-2.19719	-0.309417	0	0	0	0	0	0	0	0	0	0	0	0	0	0	0	0	0	0	0	0	0	0	0	0	0	0	0	0
0	0	0	0	3.97538	-0.558403	-2.28052	0.876149	1.05091	1.12724	-1.34002	1.72381	0	0	0	0	0	0	0	0	0	0	0	0	0	0	0	0	0	0	0	0	0	0	0	0	0	0	0	0
0	0	0	0	0	-3.52579	0.376636	0.759758	1.52556	0.0351943	0.281162	1.3309	0	0	0	0	0	0	0	0	0	0	0	0	0	0	0	0	0	0	0	0	0	0	0	0	0	0	0	0
0	0	0	0	0	0	-2.58698	0.208213	0.698521	1.58631	-0.943487	0.317235	0	0	0	0	0	0	0	0	0	0	0	0	0	0	0	0	0	0	0	0	0	0	0	0	0	0	0	0
0	0	0	0	0	0	0	-0.880277	0.813524	0.637493	-0.583497	2.46904	0	0	0	0	0	0	0	0	0	0	0	0	0	0	0	0	0	0	0	0	0	0	0	0	0	0	0	0
0	0	0	0	0	0	0	0	-1.97876	-0.0596886	0.855343	0.191518	0	0	0	0	0	0	0	0	0	0	0	0	0	0	0	0	0	0	0	0	0	0	0	0	0	0	0	0
0	0	0	0	0	0	0	0	0	1.0126	0.686382	0.538252	0	0	0	0	0	0	0	0	0	0	0	0	0	0	0	0	0	0	0	0	0	0	0	0	0	0	0	0
0	0	0	0	0	0	0	0	0	0	2.68741	1.05981	0	0	0	0	0	0	0	0	0	0	0	0	0	0	0	0	0	0	0	0	0	0	0	0	0	0	0	0
0	0	0	0	0	0	0	0	0	0	0	0.858405	0	0	0	0	0	0	0	0	0	0	0	0	0	0	0	0	0	0	0	0	0	0	0	0	0	0	0	0
0	0	0	0	0	0	0	0	0	0	0	0	0	0	0	0	0	0	0	0	0	0	0	0	0	0	0	0	0	0	0	0	0	0	0	0	0	0	0	0
4.56414	0.791395	0.539312	-0.25267	-0.577721	0.809713	-0.162793	1.02442	-0.940919	0.571424	-0.356686	0.402081	-0.057542	0	0	0	0	0	0	0	0	0	0	0	0	0	0	0	0	0	0	0	0	0	0	0	0	0	0	0
0	2.51548	2.48558	0.206223	-0.866584	-0.231683	-1.40509	0.889409	0.0308514	0.416578	0.502773	-1.69583	0.455256	0	0	0	0	0	0	0	0	0	0	0	0	0	0	0	0	0	0	0	0	0	0	0	0	0	0	0
0	0	2.51739	1.19888	-2.58695	-1.55879	0.46093	-0.228059	1.42789	0.451881	-0.268748	0.667388	-0.218499	0	0	0	0	0	0	0	0	0	0	0	0	0	0	0	0	0	0	0	0	0	0	0	0	0	0	0
0	0	0	-2.27483	2.18331	-0.649332	-0.724777	0.144616	0.316777	-0.248864	-0.609641	0.396954	-1.42302	0	0	0	0	0	0	0	0	0	0	0	0	0	0	0	0	0	0	0	0	0	0	0	0	0	0	0
0	0	0	0	3.67004	-0.235928	0.123412	0.890942	0.0935005	-1.01345	0.438125	1.05286	1.07693	0	0	0	0	0	0	0	0	0	0	0	0	0	0	0	0	0	0	0	0	0	0	0	0	0	0	0
0	0	0	0	0	-3.76684	-0.349195	0.0993023	-0.935025	1.74311	-0.756348	0.828476	-0.502893	0	0	0	0	0	0	0	0	0	0	0	0	0	0	0	0	0	0	0	0	0	0	0	0	0	0	0
0	0	0	0	0	0	-1.32738	0.801458	0.400185	0.490633	0.489215	-2.30609	0.293679	0	0	0	0	0	0	0	0	0	0	0	0	0	0	0	0	0	0	0	0	0	0	0	0	0	0	0
0	0	0	0	0	0	0	2.08583	1.04747	1.10459	0.0995948	-0.327964	-1.08464	0	0	0	0	0	0	0	0	0	0	0	0	0	0	0	0	0	0	0	0	0	0	0	0	0	0	0
0	0	0	0	0	0	0	0	2.73246	-0.288613	-0.911903	0.113851	1.65543	0	0	0	0	0	0	0	0	0	0	0	0	0	0	0	0	0	0	0	0	0	0	0	0	0	0	0
0	0	0	0	0	0	0	0	0	-1.39891	-0.275147	-0.775379	-0.261442	0	0	0	0	0	0	0	0	0	0	0	0	0	0	0	0	0	0	0	0	0	0	0	0	0	0	0
0	0	0	0	0	0	0	0	0	0	1.70088	0.529077	2.09897	0	0	0	0	0	0	0	0	0	0	0	0	0	0	0	0	0	0	0	0	0	0	0	0	0	0	0
0	0	0	0	0	0	0	0	0	0	0	-1.10236	-1.56163	0	0	0	0	0	0	0	0	0	0	0	0	0	0	0	0	0	0	0	0	0	0	0	0	0	0	0
0	0	0	0	0	0	0	0	0	0	0	0	0.401744	0	0	0	0	0	0	0	0	0	0	0	0	0	0	0	0	0	0	0	0	0	0	0	0	0	0	0
0	0	0	0	0	0	0	0	0	0	0	0	0	0	0	0	0	0	0	0	0	0	0	0	0	0	0	0	0	0	0	0	0	0	0	0	0	0	0	0
-4.13831	0.631262	1.28128	0.247678	0.2404	0.332458	-0.725833	-0.384151	0.579062	-0.373798	-2.31113	0.188962	1.0288	0.00261099	0	0	0	0	0	0	0	0	0	0	0	0	0	0	0	0	0	0	0	0	0	0	0	0	0	0
0	4.50805	-0.970073	0.224112	1.02961	-0.303805	1.43162	1.06086	-0.387536	-1.15637	1.26287	-1.26986	-0.183643	1.3363	0	0	0	0	0	0	0	0	0	0	0	0	0	0	0	0	0	0	0	0	0	0	0	0	0	0
0	0	-3.76423	-0.914229	0.261644	-1.43218	-2.07451	0.160339	1.7079	0.377967	-1.57502	-0.0726433	0.175392	0.292946	0	0	0	0	0	0	0	0	0	0	0	0	0	0	0	0	0	0	0	0	0	0	0	0	0	0
0	0	0	2.54993	-0.911278	-0.347116	-0.335183	1.629	0.327732	0.702292	0.0455248	0.00186269	-0.0866817	0.00901917	0	0	0	0	0	0	0	0	0	0	0	0	0	0	0	0	0	0	0	0	0	0	0	0	0	0
0	0	0	0	-4.14487	-2.03495	-0.801901	0.266924	-0.222068	2.29444	-1.05511	-0.00782889	0.980367	-1.13848	0	0	0	0	0	0	0	0	0	0	0	0	0	0	0	0	0	0	0	0	0	0	0	0	0	0
0	0	0	0	0	2.51025	-0.471638	-0.207519	-0.783914	-0.212436	-1.09901	-1.25021	-0.0693655	-1.33167	0	0	0	0	0	0	0	0	0	0	0	0	0	0	0	0	0	0	0	0	0	0	0	0	0	0
0	0	0	0	0	0	-3.44347	-0.355357	-0.75515	0.175674	-0.287963	0.387325	-0.225907	0.26021	0	0	0	0	0	0	0	0	0	0	0	0	0	0	0	0	0	0	0	0	0	0	0	0	0	0
0	0	0	0	0	0	0	2.63075	-0.201264	-0.78215	-1.33238	-0.613094	2.46761	0.202581	0	0	0	0	0	0	0	0	0	0	0	0	0	0	0	0	0	0	0	0	0	0	0	0	0	0
0	0	0	0	0	0	0	0	-1.93656	0.144237	-0.906919	0.911272	-0.97743	-0.526634	0	0	0	0	0	0	0	0	0	0	0	0	0	0	0	0	0	0	0	0	0	0	0	0	0	0
0	0	0	0	0	0	0	0	0	2.52781	1.51573	1.22239	-1.14004	0.757895	0	0	0	0	0	0	0	0	0	0	0	0	0	0	0	0	0	0	0	0	0	0	0	0	0	0
0	0	0	0	0	0	0	0	0	0	-1.53442	0.157445	-2.40413	1.74504	0	0	0	0	0	0	0	0	0	0	0	0	0	0	0	0	0	0	0	0	0	0	0	0	0	0
0	0	0	0	0	0	0	0	0	0	0	-1.23443	0.885175	0.0890415	0	0	0	0	0	0	0	0	0	0	0	0	0	0	0	0	0	0	0	0	0	0	0	0	0	0
0	0	0	0	0	0	0	0	0	0	0	0	-0.268771	-1.64067	0	0	0	0	0	0	0	0	0	0	0	0	0	0	0	0	0	0	0	0	0	0	0	0	0	0
0	0	0	0	0	0	0	0	0	0	0	0	0	-0.947561	0	0	0	0	0	0	0	0	0	0	0	0	0	0	0	0	0	0	0	0	0	0	0	0	0	0
0	0	0	0	0	0	0	0	0	0	0	0	0	0	0	0	0	0	0	0	0	0	0	0	0	0	0	0	0	0	0	0	0	0	0	0	0	0	0	0
3.97062	-0.635128	-1.22233	0.384771	0.15266	0.829627	-0.657446	1.07717	0.343786	1.92463	-0.306032	-1.29403	-0.605931	-0.896244	-0.72749	0	0	0	0	0	0	0	0	0	0	0	0	0	0	0	0	0	0	0	0	0	0	0	0	0
0	-4.07249	-2.21205	-0.701619	0.695059	-0.0247082	-1.85734	1.22716	0.973182	1.494	-0.96607	0.0942661	0.107533	-0.519638	0.111684	0	0	0	0	0	0	0	0	0	0	0	0	0	0	0	0	0	0	0	0	0	0	0	0	0
0	0	-3.91155	0.21038	1.65608	0.103772	0.938169	-1.34182	-0.472473	1.77667	-0.279596	-1.60939	1.08104	-0.446901	-1.02917	0	0	0	0	0	0	0	0	0	0	0	0	0	0	0	0	0	0	0	0	0	0	0	0	0
0	0	0	4.14993	-1.82624	0.22135	-0.557335	1.01728	0.359775	0.309234	0.208281	-1.20011	-1.40253	-1.4668	-0.419202	0	0	0	0	0	0	0	0	0	0	0	0	0	0	0	0	0	0	0	0	0	0	0	0	0
0	0	0	0	-4.28977	-0.625817	-0.37046	0.551527	-0.608284	0.225403	-0.0966769	0.97519	-1.945	0.260266	-0.476624	0	0	0	0	0	0	0	0	0	0	0	0	0	0	0	0	0	0	0	0	0	0	0	0	0
0	0	0	0	0	-2.2718	-1.24216	-0.482058	-1.15124	-0.737531	0.708628	-0.978284	1.48021	0.379513	1.94818	0	0	0	0	0	0	0	0	0	0	0	0	0	0	0	0	0	0	0	0	0	0	0	0	0
0	0	0	0	0	0	-2.95403	-0.546977	-0.560338	1.0337	0.515013	0.0864093	1.7479	1.18782	0.324198	0	0	0	0	0	0	0	0	0	0	0	0	0	0	0	0	0	0	0	0	0	0	0	0	0
0	0	0	0	0	0	0	-2.94679	1.93435	-0.38289	-0.223683	-0.757488	-0.00365236	0.429149	0.843452	0	0	0	0	0	0	0	0	0	0	0	0	0	0	0	0	0	0	0	0	0	0	0	0	0
0	0	0	0	0	0	0	0	-3.14279	0.175499	0.391123	0.739662	1.57914	0.229905	-0.225871	0	0	0	0	0	0	0	0	0	0	0	0	0	0	0	0	0	0	0	0	0	0	0	0	0
0	0	0	0	0	0	0	0	0	1.84194	-0.265405	-1.31305	1.94322	0.386499	-0.206691	0	0	0	0	0	0	0	0	0	0	0	0	0	0	0	0	0	0	0	0	0	0	0	0	0
0	0	0	0	0	0	0	0	0	0	1.82408	-1.08574	0.109189	-1.39271	0.615811	0	0	0	0	0	0	0	0	0	0	0	0	0	0	0	0	0	0	0	0	0	0	0	0	0
0	0	0	0	0	0	0	0	0	0	0	-1.09855	-0.0297657	-0.422418	0.211302	0	0	0	0	0	0	0	0	0	0	0	0	0	0	0	0	0	0	0	0	0	0	0	0	0
0	0	0	0	0	0	0	0	0	0	0	0	1.76141	-0.123882	-0.554471	0	0	0	0	0	0	0	0	0	0	0	0	0	0	0	0	0	0	0	0	0	0	0	0	0
0	0	0	0	0	0	0	0	0	0	0	0	0	-0.649931	-0.775254	0	0	0	0	0	0	0	0	0	0	0	0	0	0	0	0	0	0	0	0	0	0	0	0	0
0	0	0	0	0	0	0	0	0	0	0	0	0	0	-0.0482231	0	0	0	0	0	0	0	0	0	0	0	0	0	0	0	0	0	0	0	0	0	0	0	0	0
0	0	0	0	0	0	0	0	0	0	0	0	0	0	0	0	0	0	0	0	0	0	0	0	0	0	0	0	0	0	0	0	0	0	0	0	0	0	0	0
3.10211	-0.906284	1.48627	-0.463399	0.339076	0.416075	-1.47721	0.524861	-0.158111	0.785431	-1.07891	-1.00187	-1.6377	-0.428101	1.12932	-1.26147	0	0	0	0	0	0	0	0	0	0	0	0	0	0	0	0	0	0	0	0	0	0	0	0
0	-3.61993	1.07336	1.61417	-0.0493414	0.803992	-1.19975	0.0451801	0.565215	0.283273	1.76956	1.0964	-2.39943	2.00789	-0.385351	0.0440502	0	0	0	0	0	0	0	0	0	0	0	0	0	0	0	0	0	0	0	0	0	0	0	0
0	0	4.24636	-0.435545	1.63067	1.12056	-0.717144	0.116925	0.240526	0.286944	-1.40019	-0.171292	0.0508235	-0.591517	0.10365	-1.05444	0	0	0	0	0	0	0	0	0	0	0	0	0	0	0	0	0	0	0	0	0	0	0	0
0	0	0	-3.48046	-1.4649	1.33886	-0.392197	0.630636	0.231822	0.533873	0.611065	0.180263	-1.24293	0.166107	-0.494558	1.26239	0	0	0	0	0	0	0	0	0	0	0	0	0	0	0	0	0	0	0	0	0	0	0	0
0	0	0	0	-3.05619	0.237912	-0.317578	-1.37455	-1.49	1.19554	0.80603	-0.542183	-0.807165	-2.43896	0.805972	0.443226	0	0	0	0	0	0	0	0	0	0	0	0	0	0	0	0	0	0	0	0	0	0	0	0
0	0	0	0	0	2.77072	0.122001	0.274616	-1.17845	0.639693	1.30133	-0.196913	-0.202692	0.216299	0.948113	-2.36054	0	0	0	0	0	0	0	0	0	0	0	0	0	0	0	0	0	0	0	0	0	0	0	0
0	0	0	0	0	0	-2.92777	0.0176623	1.65549	0.92618	-0.00217528	0.678657	-0.586156	0.413037	0.771208	-1.24824	0	0	0	0	0	0	0	0	0	0	0	0	0	0	0	0	0	0	0	0	0	0	0	0
0	0	0	0	0	0	0	-2.44023	1.49549	-0.670467	-0.766902	0.151391	-2.56856	0.389586	-0.0081336	-0.99558	0	0	0	0	0	0	0	0	0	0	0	0	0	0	0	0	0	0	0	0	0	0	0	0
0	0	0	0	0	0	0	0	4.05918	1.39904	0.420494	-0.499693	-0.0668121	1.56595	0.423616	-0.0468301	0	0	0	0	0	0	0	0	0	0	0	0	0	0	0	0	0	0	0	0	0	0	0	0
0	0	0	0	0	0	0	0	0	1.55236	1.67849	0.212347	-0.331484	0.669844	-1.1876	0.558475	0	0	0	0	0	0	0	0	0	0	0	0	0	0	0	0	0	0	0	0	0	0	0	0
0	0	0	0	0	0	0	0	0	0	-1.94148	1.74397	0.831848	-0.749825	-0.872299	1.29793	0	0	0	0	0	0	0	0	0	0	0	0	0	0	0	0	0	0	0	0	0	0	0	0
0	0	0	0	0	0	0	0	0	0	0	2.23608	-1.46216	-1.0643	0.708848	-0.00901627	0	0	0	0	0	0	0	0	0	0	0	0	0	0	0	0	0	0	0	0	0	0	0	0
0	0	0	0	0	0	0	0	0	0	0	0	-1.53632	0.114284	0.491218	-0.144847	0	0	0	0	0	0	0	0	0	0	0	0	0	0	0	0	0	0	0	0	0	0	0	0
0	0	0	0	0	0	0	0	0	0	0	0	0	-1.62863	-0.79773	0.328533	0	0	0	0	0	0	0	0	0	0	0	0	0	0	0	0	0	0	0	0	0	0	0	0
0	0	0	0	0	0	0	0	0	0	0	0	0	0	-1.84212	-0.891167	0	0	0	0	0	0	0	0	0	0	0	0	0	0	0	0	0	0	0	0	0	0	0	0
0	0	0	0	0	0	0	0	0	0	0	0	0	0	0	1.53598	0	0	0	0	0	0	0	0	0	0	0	0	0	0	0	0	0	0	0	0	0	0	0	0
0	0	0	0	0	0	0	0	0	0	0	0	0	0	0	0	0	0	0	0	0	0	0	0	0	0	0	0	0	0	0	0	0	0	0	0	0	0	0	0
-4.21845	-0.617318	0.924398	0.158244	-1.136	-0.803704	-1.71731	-1.6154	0.87573	-0.18943	1.35603	-0.545833	1.44233	0.828438	0.961569	-0.225981	0.0879501	0	0	0	0	0	0	0	0	0	0	0	0	0	0	0	0	0	0	0	0	0	0	0
0	-3.67429	-2.07326	-1.60569	0.460566	0.0740979	-1.92938	0.0487755	0.674654	0.466287	-0.116233	0.549546	1.35444	0.430558	0.891806	0.376475	-1.44063	0	0	0	0	0	0	0	0	0	0	0	0	0	0	0	0	0	0	0	0	0	0	0
0	0	-3.88292	-0.996509	0.66431	-0.32333	0.0440404	-2.14523	-1.04345	0.940718	-0.588261	-0.288183	0.856077	0.656295	-0.175279	1.93588	-1.34817	0	0	0	0	0	0	0	0	0	0	0	0	0	0	0	0	0	0	0	0	0	0	0
0	0	0	3.16103	1.62424	0.173735	1.95203	-1.20536	1.00021	-0.45803	1.80531	-0.478962	-0.530255	-0.192645	-0.41333	1.81898	0.0295309	0	0	0	0	0	0	0	0	0	0	0	0	0	0	0	0	0	0	0	0	0	0	0
0	0	0	0	-3.36576	-0.226399	0.523091	-0.689865	0.532936	0.035916	-0.191556	0.860045	0.347597	0.597894	-0.10787	-0.834081	-0.882864	0	0	0	0	0	0	0	0	0	0	0	0	0	0	0	0	0	0	0	0	0	0	0
0	0	0	0	0	3.25588	-2.15175	-1.51833	0.367271	1.23092	0.404901	0.964921	1.65563	0.0805473	-0.645657	1.46824	0.789982	0	0	0	0	0	0	0	0	0	0	0	0	0	0	0	0	0	0	0	0	0	0	0
0	0	0	0	0	0	2.07825	-0.724131	-0.150048	-0.180221	2.13959	-0.383851	-0.129009	-0.744779	1.4784	-0.410733	-0.213275	0	0	0	0	0	0	0	0	0	0	0	0	0	0	0	0	0	0	0	0	0	0	0
0	0	0	0	0	0	0	-5.36681	-0.356342	-0.152318	0.571297	0.0888247	-1.3847	1.3353	0.469782	-0.467457	-1.86638	0	0	0	0	0	0	0	0	0	0	0	0	0	0	0	0	0	0	0	0	0	0	0
0	0	0	0	0	0	0	0	-3.2745	-0.315569	2.45342	-0.160897	-1.07383	0.570166	-1.11609	-0.888372	-1.28747	0	0	0	0	0	0	0	0	0	0	0	0	0	0	0	0	0	0	0	0	0	0	0
0	0	0	0	0	0	0	0	0	3.72394	-0.204099	0.0977065	-1.3303	1.52625	0.857167	0.0475898	0.348584	0	0	0	0	0	0	0	0	0	0	0	0	0	0	0	0	0	0	0	0	0	0	0
0	0	0	0	0	0	0	0	0	0	2.48294	0.156535	0.35688	0.00982392	-1.24188	-1.67611	0.583139	0	0	0	0	0	0	0	0	0	0	0	0	0	0	0	0	0	0	0	0	0	0	0
0	0	0	0	0	0	0	0	0	0	0	2.11814	0.234999	-1.57477	-0.500319	-1.72439	-0.858697	0	0	0	0	0	0	0	0	0	0	0	0	0	0	0	0	0	0	0	0	0	0	0
0	0	0	0	0	0	0	0	0	0	0	0	1.09119	1.10264	0.78965	0.120527	0.970875	0	0	0	0	0	0	0	0	0	0	0	0	0	0	0	0	0	0	0	0	0	0	0
0	0	0	0	0	0	0	0	0	0	0	0	0	-2.94256	-0.116089	0.149308	0.355988	0	0	0	0	0	0	0	0	0	0	0	0	0	0	0	0	0	0	0	0	0	0	0
0	0	0	0	0	0	0	0	0	0	0	0	0	0	1.58366	0.812258	0.30137	0	0	0	0	0	0	0	0	0	0	0	0	0	0	0	0	0	0	0	0	0	0	0
0	0	0	0	0	0	0	0	0	0	0	0	0	0	0	-1.34886	1.24093	0	0	0	0	0	0	0	0	0	0	0	0	0	0	0	0	0	0	0	0	0	0	0
0	0	0	0	0	0	0	0	0	0	0	0	0	0	0	0	0.219644	0	0	0	0	0	0	0	0	0	0	0	0	0	0	0	0	0	0	0	0	0	0	0
0	0	0	0	0	0	0	0	0	0	0	0	0	0	0	0	0	0	0	0	0	0	0	0	0	0	0	0	0	0	0	0	0	0	0	0	0	0	0	0
5.27206	-1.53314	-0.433785	-0.0658801	-0.0935008	-0.123236	1.47816	-0.932101	0.12163	1.15165	1.22147	-1.38411	-0.913517	-1.15565	-0.501206	-0.383584	-2.91105	1.97646	0	0	0	0	0	0	0	0	0	0	0	0	0	0	0	0	0	0	0	0	0	0
0	4.36773	-0.595424	0.387119	1.44168	-0.304844	-1.37702	0.126581	1.44765	-0.00863082	0.419209	-1.7186	0.191622	-1.40668	-0.497812	0.863897	0.932205	0.300266	0	0	0	0	0	0	0	0	0	0	0	0	0	0	0	0	0	0	0	0	0	0
0	0	4.27419	-1.05163	0.351309	-0.70829	-0.508214	-0.140605	1.56281	-0.600546	0.487479	0.816571	-1.5713	-0.210734	0.745144	0.45344	-0.702475	0.641439	0	0	0	0	0	0	0	0	0	0	0	0	0	0	0	0	0	0	0	0	0	0
0	0	0	2.44468	1.78051	0.743365	0.381997	0.0465985	0.0760412	0.493674	0.236317	-1.35724	1.94737	-1.47101	2.13051	-1.03525	-0.85284	-0.188805	0	0	0	0	0	0	0	0	0	0	0	0	0	0	0	0	0	0	0	0	0	0
0	0	0	0	-3.76617	-3.13743	0.740355	-0.739846	-1.75458	-0.512239	0.0798084	-0.932456	-0.0424933	-1.13121	1.40245	0.23473	0.784387	-0.50545	0	0	0	0	0	0	0	0	0	0	0	0	0	0	0	0	0	0	0	0	0	0
0	0	0	0	0	4.15201	-0.70078	0.78273	1.54039	0.632088	-0.883668	-0.63052	0.839236	-0.661389	0.0808424	-1.48289	-0.376101	0.83408	0	0	0	0	0	0	0	0	0	0	0	0	0	0	0	0	0	0	0	0	0	0
0	0	0	0	0	0	-3.68066	0.693087	-1.39138	0.151959	0.651355	-0.541586	0.230597	-0.32992	-0.153796	-0.638704	0.889225	0.79197	0	0	0	0	0	0	0	0	0	0	0	0	0	0	0	0	0	0	0	0	0	0
0	0	0	0	0	0	0	-3.86904	0.29422	-1.46299	0.980054	-0.300014	-0.236121	1.17041	-1.24978	1.74897	1.08653	0.842618	0	0	0	0	0	0	0	0	0	0	0	0	0	0	0	0	0	0	0	0	0	0
0	0	0	0	0	0	0	0	-3.15049	0.901073	-0.185264	-0.974962	-1.55726	0.505533	-0.042922	-0.622523	-1.11613	0.0731475	0	0	0	0	0	0	0	0	0	0	0	0	0	0	0	0	0	0	0	0	0	0
0	0	0	0	0	0	0	0	0	3.42799	-0.100277	1.79149	-0.106592	-0.643945	-1.27939	1.68607	-1.74852	0.13597	0	0	0	0	0	0	0	0	0	0	0	0	0	0	0	0	0	0	0	0	0	0
0	0	0	0	0	0	0	0	0	0	-2.61029	-1.03933	-0.688578	0.323801	1.42416	1.04932	1.42299	-0.556629	0	0	0	0	0	0	0	0	0	0	0	0	0	0	0	0	0	0	0	0	0	0
0	0	0	0	0	0	0	0	0	0	0	3.46057	-0.277504	-1.01618	-0.804905	-0.379031	-0.65857	0.757797	0	0	0	0	0	0	0	0	0	0	0	0	0	0	0	0	0	0	0	0	0	0
0	0	0	0	0	0	0	0	0	0	0	0	-3.27567	-0.301093	-3.77345	-3.88508	-0.992648	-0.291809	0	0	0	0	0	0	0	0	0	0	0	0	0	0	0	0	0	0	0	0	0	0
0	0	0	0	0	0	0	0	0	0	0	0	0	2.03647	2.16815	0.631505	-0.682644	-2.1873	0	0	0	0	0	0	0	0	0	0	0	0	0	0	0	0	0	0	0	0	0	0
0	0	0	0	0	0	0	0	0	0	0	0	0	0	-1.02095	0.840232	-0.534586	-1.80085	0	0	0	0	0	0	0	0	0	0	0	0	0	0	0	0	0	0	0	0	0	0
0	0	0	0	0	0	0	0	0	0	0	0	0	0	0	0.900313	1.23377	0.472296	0	0	0	0	0	0	0	0	0	0	0	0	0	0	0	0	0	0	0	0	0	0
0	0	0	0	0	0	0	0	0	0	0	0	0	0	0	0	0.976826	-0.722743	0	0	0	0	0	0	0	0	0	0	0	0	0	0	0	0	0	0	0	0	0	0
0	0	0	0	0	0	0	0	0	0	0	0	0	0	0	0	0	-0.516962	0	0	0	0	0	0	0	0	0	0	0	0	0	0	0	0	0	0	0	0	0	0
0	0	0	0	0	0	0	0	0	0	0	0	0	0	0	0	0	0	0	0	0	0	0	0	0	0	0	0	0	0	0	0	0	0	0	0	0	0	0	0
-4.47653	-0.452415	2.17022	-1.07863	-1.20537	0.0622941	-0.228762	-0.463998	1.6167	1.04851	-0.228969	0.549907	-0.153111	0.131876	-0.436475	1.31482	1.04431	0.0925685	0.301811	0	0	0	0	0	0	0	0	0	0	0	0	0	0	0	0	0	0	0	0	0
0	2.3992	-0.344018	-0.232679	0.287534	-0.825382	1.77357	-0.31987	-0.612993	-0.00497439	1.80497	-1.54594	1.56494	1.29244	-0.252742	-0.340605	0.184708	0.388234	-1.03336	0	0	0	0	0	0	0	0	0	0	0	0	0	0	0	0	0	0	0	0	0
0	0	4.69192	1.15463	0.730048	0.0868109	-0.175591	0.188431	-0.205427	-0.941915	1.60877	-0.159937	1.3555	-0.402059	1.70303	-1.12463	-1.98806	2.83708	-0.213436	0	0	0	0	0	0	0	0	0	0	0	0	0	0	0	0	0	0	0	0	0
0	0	0	-4.09383	-0.00513914	1.1917	0.487305	0.630906	0.887507	-0.114468	-1.42645	0.600683	0.272296	0.424247	-0.945441	-0.40478	-0.160622	0.355369	-2.31795	0	0	0	0	0	0	0	0	0	0	0	0	0	0	0	0	0	0	0	0	0
0	0	0	0	3.94251	-0.528277	-0.606233	-1.10931	-1.09591	-0.538319	-1.37751	-0.66966	-0.624477	2.05099	0.469685	-0.0882828	-0.85435	2.7639	-1.25476	0	0	0	0	0	0	0	0	0	0	0	0	0	0	0	0	0	0	0	0	0
0	0	0	0	0	4.96946	-0.178656	-0.326342	0.0536464	-1.03637	0.206686	0.934492	0.141907	-0.0653103	1.6121	0.828664	1.67607	-1.20068	-0.220331	0	0	0	0	0	0	0	0	0	0	0	0	0	0	0	0	0	0	0	0	0
0	0	0	0	0	0	4.28235	-0.92243	0.721661	-0.710087	-0.125095	1.60549	-0.632456	1.13253	-2.01833	-0.371605	0.663225	0.60082	0.868354	0	0	0	0	0	0	0	0	0	0	0	0	0	0	0	0	0	0	0	0	0
0	0	0	0	0	0	0	-4.57486	0.79967	-0.21313	-1.11342	-0.431779	0.0596597	1.5421	0.524977	1.38964	-0.385149	-0.891345	0.285693	0	0	0	0	0	0	0	0	0	0	0	0	0	0	0	0	0	0	0	0	0
0	0	0	0	0	0	0	0	-4.12226	-2.37079	-2.10464	0.645503	0.815851	-1.01655	1.07042	0.0169987	-0.995107	0.102077	-0.556104	0	0	0	0	0	0	0	0	0	0	0	0	0	0	0	0	0	0	0	0	0
0	0	0	0	0	0	0	0	0	3.25946	-1.31188	0.579742	-0.964512	-1.4511	-0.0424861	-0.411952	-0.541536	0.7542	0.198343	0	0	0	0	0	0	0	0	0	0	0	0	0	0	0	0	0	0	0	0	0
0	0	0	0	0	0	0	0	0	0	4.34212	0.789457	1.22938	0.107675	0.191435	-1.47354	2.36559	0.174613	-0.490102	0	0	0	0	0	0	0	0	0	0	0	0	0	0	0	0	0	0	0	0	0
0	0	0	0	0	0	0	0	0	0	0	-1.80762	1.21122	1.03668	0.286641	-1.01081	-1.78398	0.473052	0.405625	0	0	0	0	0	0	0	0	0	0	0	0	0	0	0	0	0	0	0	0	0
0	0	0	0	0	0	0	0	0	0	0	0	1.40206	-0.179953	-0.653594	0.20992	-1.19229	0.0224768	-0.348939	0	0	0	0	0	0	0	0	0	0	0	0	0	0	0	0	0	0	0	0	0
0	0	0	0	0	0	0	0	0	0	0	0	0	3.3057	1.88057	-1.31284	-1.63874	0.266115	0.472073	0	0	0	0	0	0	0	0	0	0	0	0	0	0	0	0	0	0	0	0	0
0	0	0	0	0	0	0	0	0	0	0	0	0	0	-1.68435	0.187197	0.693167	-1.54805	-2.18676	0	0	0	0	0	0	0	0	0	0	0	0	0	0	0	0	0	0	0	0	0
0	0	0	0	0	0	0	0	0	0	0	0	0	0	0	-0.902122	-0.552392	0.372264	-0.43422	0	0	0	0	0	0	0	0	0	0	0	0	0	0	0	0	0	0	0	0	0
0	0	0	0	0	0	0	0	0	0	0	0	0	0	0	0	1.14193	0.509784	0.887588	0	0	0	0	0	0	0	0	0	0	0	0	0	0	0	0	0	0	0	0	0
0	0	0	0	0	0	0	0	0	0	0	0	0	0	0	0	0	1.06056	-0.080019	0	0	0	0	0	0	0	0	0	0	0	0	0	0	0	0	0	0	0	0	0
0	0	0	0	0	0	0	0	0	0	0	0	0	0	0	0	0	0	-0.238916	0	0	0	0	0	0	0	0	0	0	0	0	0	0	0	0	0	0	0	0	0
0	0	0	0	0	0	0	0	0	0	0	0	0	0	0	0	0	0	0	0	0	0	0	0	0	0	0	0	0	0	0	0	0	0	0	0	0	0	0	0
3.81437	-0.187603	1.57348	-1.22282	-1.19664	1.06958	1.53278	0.346725	0.556007	-0.1181	1.2716	-0.812925	1.28097	-0.647813	0.649519	-1.68329	0.138531	1.14439	2.0144	0.094325	0	0	0	0	0	0	0	0	0	0	0	0	0	0	0	0	0	0	0	0
0	4.26858	0.281422	-0.124646	0.348426	-1.72778	-2.23226	0.249521	0.736502	0.0584004	-2.15092	-1.76036	0.0304837	1.66687	-1.56419	-1.56766	-0.90506	-0.910254	0.273866	0.977117	0	0	0	0	0	0	0	0	0	0	0	0	0	0	0	0	0	0	0	0
0	0	3.54886	1.39503	0.00541649	-0.591324	-0.00646773	0.196589	0.264976	-1.08673	0.782747	0.653313	-0.472906	-0.467174	1.67706	0.0397636	-0.130503	-1.06778	1.39034	-0.461582	0	0	0	0	0	0	0	0	0	0	0	0	0	0	0	0	0	0	0	0
0	0	0	-3.89928	1.26928	-0.559665	-0.0989143	1.38979	-0.340821	0.0827095	-1.33944	-0.46109	-1.51953	1.93355	-1.76965	0.942562	0.824903	-0.645458	1.84348	-0.859787	0	0	0	0	0	0	0	0	0	0	0	0	0	0	0	0	0	0	0	0
0	0	0	0	4.74012	-0.455311	0.038075	0.77196	-0.277774	0.946156	-0.0309448	-1.03473	-0.891338	0.930407	-1.68785	0.634226	0.66528	1.83229	-1.68416	1.31221	0	0	0	0	0	0	0	0	0	0	0	0	0	0	0	0	0	0	0	0
0	0	0	0	0	3.76768	-1.1715	0.481071	0.94057	1.00758	-1.01651	1.27336	-1.9661	1.10536	-0.281081	0.828109	0.403066	-0.323646	-0.984906	-0.492335	0	0	0	0	0	0	0	0	0	0	0	0	0	0	0	0	0	0	0	0
0	0	0	0	0	0	-5.04123	0.355226	0.0222498	0.433709	0.4151	-0.408617	-0.504068	0.597106	-0.24404	0.190727	-0.028926	-0.260428	0.982813	-0.383598	0	0	0	0	0	0	0	0	0	0	0	0	0	0	0	0	0	0	0	0
0	0	0	0	0	0	0	3.34927	0.263838	0.651279	1.36065	0.609637	0.287133	1.9254	-0.0478167	-0.802876	-0.894724	-1.72386	-0.357578	-0.836866	0	0	0	0	0	0	0	0	0	0	0	0	0	0	0	0	0	0	0	0
0	0	0	0	0	0	0	0	-2.69174	1.27885	-0.690616	-0.525107	-0.514206	0.172624	-2.10851	0.846732	0.646308	0.203296	-1.14724	-0.389135	0	0	0	0	0	0	0	0	0	0	0	0	0	0	0	0	0	0	0	0
0	0	0	0	0	0	0	0	0	-4.85552	-1.57306	-0.359275	-0.553056	-1.32339	1.85765	-0.216762	0.362725	-1.20833	1.59648	-0.505308	0	0	0	0	0	0	0	0	0	0	0	0	0	0	0	0	0	0	0	0
0	0	0	0	0	0	0	0	0	0	-2.56634	-0.366263	-0.6138	0.283483	-0.651964	-0.708125	0.459688	-0.0102101	-0.374534	-1.39865	0	0	0	0	0	0	0	0	0	0	0	0	0	0	0	0	0	0	0	0
0	0	0	0	0	0	0	0	0	0	0	-2.02441	0.619547	-0.0257851	-0.154693	1.0718	-0.597884	0.123928	0.372546	-0.214608	0	0	0	0	0	0	0	0	0	0	0	0	0	0	0	0	0	0	0	0
0	0	0	0	0	0	0	0	0	0	0	0	-2.05703	2.30256	1.242	-1.1387	-0.83592	-0.0476903	-0.325512	-0.22855	0	0	0	0	0	0	0	0	0	0	0	0	0	0	0	0	0	0	0	0
0	0	0	0	0	0	0	0	0	0	0	0	0	-2.03718	-0.0766033	0.810857	-1.12398	-0.15851	0.192484	-0.730342	0	0	0	0	0	0	0	0	0	0	0	0	0	0	0	0	0	0	0	0
0	0	0	0	0	0	0	0	0	0	0	0	0	0	2.3001	-0.280855	-1.63426	0.166469	0.493538	1.02832	0	0	0	0	0	0	0	0	0	0	0	0	0	0	0	0	0	0	0	0
0	0	0	0	0	0	0	0	0	0	0	0	0	0	0	-1.21249	-2.06092	0.435105	-0.609469	-0.711346	0	0	0	0	0	0	0	0	0	0	0	0	0	0	0	0	0	0	0	0
0	0	0	0	0	0	0	0	0	0	0	0	0	0	0	0	0.630416	-1.79973	0.415367	-0.0686519	0	0	0	0	0	0	0	0	0	0	0	0	0	0	0	0	0	0	0	0
0	0	0	0	0	0	0	0	0	0	0	0	0	0	0	0	0	1.21993	-1.21674	1.5821	0	0	0	0	0	0	0	0	0	0	0	0	0	0	0	0	0	0	0	0
0	0	0	0	0	0	0	0	0	0	0	0	0	0	0	0	0	0	-1.73457	0.52557	0	0	0	0	0	0	0	0	0	0	0	0	0	0	0	0	0	0	0	0
0	0	0	0	0	0	0	0	0	0	0	0	0	0	0	0	0	0	0	-0.325738	0	0	0	0	0	0	0	0	0	0	0	0	0	0	0	0	0	0	0	0
0	0	0	0	0	0	0	0	0	0	0	0	0	0	0	0	0	0	0	0	0	0	0	0	0	0	0	0	0	0	0	0	0	0	0	0	0	0	0	0
3.99596	-1.54169	1.76195	-1.60046	0.0906935	0.445204	0.818099	-0.675512	-0.633442	-1.77287	-0.874042	1.03765	-1.14354	-0.495579	-0.606794	-0.152315	0.746646	0.139658	0.0611445	0.0610231	1.35355	0	0	0	0	0	0	0	0	0	0	0	0	0	0	0	0	0	0	0
0	-4.45277	1.98057	-0.956102	-0.233742	0.223959	0.437984	0.686374	-0.522194	-0.521173	-0.613956	0.415145	1.22981	0.582192	1.39777	-1.9182	-0.377177	0.767895	1.35081	-0.335496	0.330416	0	0	0	0	0	0	0	0	0	0	0	0	0	0	0	0	0	0	0
0	0	4.5241	0.577857	0.880579	-0.439287	0.570841	0.835963	0.277455	0.85555	0.261032	-0.827394	0.456768	-0.270876	-0.426492	1.2345	0.247277	0.814898	-0.744889	1.37434	1.65391	0	0	0	0	0	0	0	0	0	0	0	0	0	0	0	0	0	0	0
0	0	0	-4.54328	0.364227	-2.12922	-1.16156	0.0574472	-0.728316	2.02116	1.15793	1.60815	0.709871	0.264096	-0.818434	0.973095	0.530817	1.85305	0.917417	0.712237	-0.814526	0	0	0	0	0	0	0	0	0	0	0	0	0	0	0	0	0	0	0
0	0	0	0	-3.45629	-1.99843	0.454391	0.372259	-0.804245	-0.516716	0.936146	0.409455	1.10956	-1.26116	-0.701825	0.972543	-1.8221	1.1789	1.13622	-0.0509523	0.191098	0	0	0	0	0	0	0	0	0	0	0	0	0	0	0	0	0	0	0
0	0	0	0	0	3.12162	0.124222	1.10102	-1.71308	-2.46665	1.7235	-1.60814	-0.809148	0.652354	1.46401	0.481635	1.30673	1.05753	0.702306	-1.58365	0.734119	0	0	0	0	0	0	0	0	0	0	0	0	0	0	0	0	0	0	0
0	0	0	0	0	0	3.55319	1.01669	-0.453322	-2.08601	1.30354	-1.96239	-0.9315	-1.54701	-1.05998	1.36059	-2.4246	0.426584	1.52351	-0.461601	0.756461	0	0	0	0	0	0	0	0	0	0	0	0	0	0	0	0	0	0	0
0	0	0	0	0	0	0	-3.90992	0.278615	0.397816	0.678804	-1.57927	0.325446	-0.446143	0.195026	-1.16369	-0.584937	-0.711131	-0.78841	-0.475781	0.527127	0	0	0	0	0	0	0	0	0	0	0	0	0	0	0	0	0	0	0
0	0	0	0	0	0	0	0	-3.78429	-1.39816	0.228417	1.82893	1.80542	0.205951	0.155516	-1.24508	0.520749	-0.529786	1.2082	-0.514296	-0.726729	0	0	0	0	0	0	0	0	0	0	0	0	0	0	0	0	0	0	0
0	0	0	0	0	0	0	0	0	-3.76408	-0.292544	-0.675975	-1.35547	0.603411	-1.44141	1.56479	0.15674	-2.33505	-0.067463	1.9073	-0.277528	0	0	0	0	0	0	0	0	0	0	0	0	0	0	0	0	0	0	0
0	0	0	0	0	0	0	0	0	0	4.68196	1.21846	-0.439948	0.6108	0.952614	0.172587	-1.12076	-0.945294	-1.2098	1.20485	1.59945	0	0	0	0	0	0	0	0	0	0	0	0	0	0	0	0	0	0	0
0	0	0	0	0	0	0	0	0	0	0	-2.63126	1.1822	-0.930331	0.530402	-0.27454	0.863036	-0.403576	-0.716891	-0.71642	-0.196177	0	0	0	0	0	0	0	0	0	0	0	0	0	0	0	0	0	0	0
0	0	0	0	0	0	0	0	0	0	0	0	2.23867	-1.82514	-1.00004	-0.0674519	1.17632	-0.698478	-1.3299	-0.688131	0.68093	0	0	0	0	0	0	0	0	0	0	0	0	0	0	0	0	0	0	0
0	0	0	0	0	0	0	0	0	0	0	0	0	-2.79803	-0.544842	1.44054	0.201559	0.760504	-0.1354	0.859184	-0.708285	0	0	0	0	0	0	0	0	0	0	0	0	0	0	0	0	0	0	0
0	0	0	0	0	0	0	0	0	0	0	0	0	0	1.89655	0.233631	-0.723482	-0.377763	-0.33037	0.327474	0.936305	0	0	0	0	0	0	0	0	0	0	0	0	0	0	0	0	0	0	0
0	0	0	0	0	0	0	0	0	0	0	0	0	0	0	1.62933	0.428437	-0.420481	0.808801	0.626844	-0.598568	0	0	0	0	0	0	0	0	0	0	0	0	0	0	0	0	0	0	0
0	0	0	0	0	0	0	0	0	0	0	0	0	0	0	0	-1.42176	-0.734614	1.11723	2.25287	1.12861	0	0	0	0	0	0	0	0	0	0	0	0	0	0	0	0	0	0	0
0	0	0	0	0	0	0	0	0	0	0	0	0	0	0	0	0	-1.03451	-1.75879	0.5239	0.211624	0	0	0	0	0	0	0	0	0	0	0	0	0	0	0	0	0	0	0
0	0	0	0	0	0	0	0	0	0	0	0	0	0	0	0	0	0	1.51222	0.653179	1.21251	0	0	0	0	0	0	0	0	0	0	0	0	0	0	0	0	0	0	0
0	0	0	0	0	0	0	0	0	0	0	0	0	0	0	0	0	0	0	-0.396366	-0.925958	0	0	0	0	0	0	0	0	0	0	0	0	0	0	0	0	0	0	0
0	0	0	0	0	0	0	0	0	0	0	0	0	0	0	0	0	0	0	0	0.844304	0	0	0	0	0	0	0	0	0	0	0	0	0	0	0	0	0	0	0
0	0	0	0	0	0	0	0	0	0	0	0	0	0	0	0	0	0	0	0	0	0	0	0	0	0	0	0	0	0	0	0	0	0	0	0	0	0	0	0
4.41836	-2.9697	0.454728	1.68597	0.509959	-0.0160435	0.132314	-0.128522	0.0503995	0.54506	0.691462	0.501874	-3.05194	0.449723	0.825267	-0.970591	1.73925	-0.520238	-0.537303	-0.396764	-0.590999	-1.05559	0	0	0	0	0	0	0	0	0	0	0	0	0	0	0	0	0	0
0	-4.71409	1.12243	1.58805	1.29305	1.06629	1.22921	1.77235	-0.822481	1.40509	-1.57439	1.04163	-1.22876	1.02231	0.0853683	1.67467	0.998877	-0.53014	-0.883965	0.836398	-1.41368	0.979307	0	0	0	0	0	0	0	0	0	0	0	0	0	0	0	0	0	0
0	0	3.75251	1.01199	-1.73009	-0.526379	0.242441	-0.0322446	0.456143	-0.584386	1.35873	0.0250297	1.2313	-0.507509	-1.65095	-0.0640761	0.0797028	-0.152165	-0.275206	0.691129	-0.15223	1.15527	0	0	0	0	0	0	0	0	0	0	0	0	0	0	0	0	0	0
0	0	0	5.41653	1.57954	-0.11573	0.645616	-0.497529	-0.177354	-0.0439339	1.34047	0.493395	-0.361323	0.863947	-0.0693485	0.117557	-0.0196393	-0.760668	-0.142384	0.295702	0.640481	0.248135	0	0	0	0	0	0	0	0	0	0	0	0	0	0	0	0	0	0
0	0	0	0	4.56202	1.26151	-0.315812	1.99574	0.504984	1.02798	-0.114604	-0.0998998	-1.05224	-0.0599089	1.31894	-2.9759	-0.0609383	0.501357	0.395665	0.87631	-0.203575	1.65776	0	0	0	0	0	0	0	0	0	0	0	0	0	0	0	0	0	0
0	0	0	0	0	-3.46802	-0.296006	-0.916406	-0.708148	0.486573	-1.35592	-0.533135	-0.178455	0.454921	-0.785182	0.681595	-1.18254	-0.810906	0.975814	1.03703	-0.186044	0.305872	0	0	0	0	0	0	0	0	0	0	0	0	0	0	0	0	0	0
0	0	0	0	0	0	5.61155	0.428996	0.430223	0.0712732	-0.518004	0.17488	0.416869	0.0787013	0.234687	0.287411	0.159739	-1.35988	-2.63127	0.82163	-0.208337	-1.11676	0	0	0	0	0	0	0	0	0	0	0	0	0	0	0	0	0	0
0	0	0	0	0	0	0	2.61112	-0.0944775	0.0552468	0.140679	-0.25733	1.21109	0.147856	-0.16987	0.0779526	0.0285373	-0.464123	0.260428	0.161594	-0.543158	-0.607722	0	0	0	0	0	0	0	0	0	0	0	0	0	0	0	0	0	0
0	0	0	0	0	0	0	0	2.92514	0.985828	2.41002	-1.05376	-0.3824	1.20272	0.429177	-0.568333	0.372703	1.45794	-1.13149	0.141188	-0.119126	1.53667	0	0	0	0	0	0	0	0	0	0	0	0	0	0	0	0	0	0
0	0	0	0	0	0	0	0	0	-2.04791	-0.448971	0.452499	0.0134359	-0.508703	-0.621326	0.121817	0.695724	2.23952	0.721546	-0.987122	-0.223639	0.726337	0	0	0	0	0	0	0	0	0	0	0	0	0	0	0	0	0	0
0	0	0	0	0	0	0	0	0	0	-2.50458	0.0135172	-0.511924	0.54805	1.0663	0.780547	-0.0937639	0.244651	-1.70463	2.1013	-1.24087	-1.11735	0	0	0	0	0	0	0	0	0	0	0	0	0	0	0	0	0	0
0	0	0	0	0	0	0	0	0	0	0	3.50831	-0.191436	-0.728113	-0.0217317	-0.0735391	-0.894506	-1.82421	-0.297251	0.763518	-0.466771	1.16271	0	0	0	0	0	0	0	0	0	0	0	0	0	0	0	0	0	0
0	0	0	0	0	0	0	0	0	0	0	0	-2.95678	-0.00233449	-0.616303	-0.779873	1.06573	1.88938	0.0887328	-0.969963	-0.129849	0.329117	0	0	0	0	0	0	0	0	0	0	0	0	0	0	0	0	0	0
0	0	0	0	0	0	0	0	0	0	0	0	0	-1.7945	0.129915	-0.339958	-2.2862	-0.306127	-0.549698	1.22677	-0.209409	1.58956	0	0	0	0	0	0	0	0	0	0	0	0	0	0	0	0	0	0
0	0	0	0	0	0	0	0	0	0	0	0	0	0	-2.07665	1.26365	-0.609791	-1.232	2.56119	1.12111	2.63888	0.361215	0	0	0	0	0	0	0	0	0	0	0	0	0	0	0	0	0	0
0	0	0	0	0	0	0	0	0	0	0	0	0	0	0	2.40217	0.232275	-0.564654	0.370487	1.38519	-1.43777	1.98058	0	0	0	0	0	0	0	0	0	0	0	0	0	0	0	0	0	0
0	0	0	0	0	0	0	0	0	0	0	0	0	0	0	0	2.11578	0.715541	1.25616	-0.638006	-0.611843	-0.639201	0	0	0	0	0	0	0	0	0	0	0	0	0	0	0	0	0	0
0	0	0	0	0	0	0	0	0	0	0	0	0	0	0	0	0	-2.81331	-1.37834	1.81635	1.16987	-0.378756	0	0	0	0	0	0	0	0	0	0	0	0	0	0	0	0	0	0
0	0	0	0	0	0	0	0	0	0	0	0	0	0	0	0	0	0	-2.06711	-1.40616	1.735	-0.637886	0	0	0	0	0	0	0	0	0	0	0	0	0	0	0	0	0	0
0	0	0	0	0	0	0	0	0	0	0	0	0	0	0	0	0	0	0	2.33172	0.479156	0.704555	0	0	0	0	0	0	0	0	0	0	0	0	0	0	0	0	0	0
0	0	0	0	0	0	0	0	0	0	0	0	0	0	0	0	0	0	0	0	1.35622	-3.14996	0	0	0	0	0	0	0	0	0	0	0	0	0	0	0	0	0	0
0	0	0	0	0	0	0	0	0	0	0	0	0	0	0	0	0	0	0	0	0	-0.962574	0	0	0	0	0	0	0	0	0	0	0	0	0	0	0	0	0	0
0	0	0	0	0	0	0	0	0	0	0	0	0	0	0	0	0	0	0	0	0	0	0	0	0	0	0	0	0	0	0	0	0	0	0	0	0	0	0	0
5.45375	-2.22499	-0.819824	-0.858714	-0.150157	0.142098	-0.696258	0.0176347	-0.775376	-0.878681	-1.3906	-0.387072	0.620696	-1.36368	1.08228	-0.366872	-1.24061	-0.538754	2.00573	-1.07151	-0.123773	-1.41716	1.37686	0	0	0	0	0	0	0	0	0	0	0	0	0	0	0	0	0
0	4.53595	1.33297	1.35867	-0.197037	1.19882	0.354123	0.586597	-0.761551	0.0083134	-1.9032	0.331526	-1.39292	-1.23253	0.303728	-0.642707	0.182968	-0.849061	-0.834022	-0.338581	-0.0508412	1.32833	0.592977	0	0	0	0	0	0	0	0	0	0	0	0	0	0	0	0	0
0	0	-4.63541	-0.778447	0.486397	0.0897235	0.772157	-0.156706	1.93246	1.44722	-0.975191	-0.966233	0.516356	-0.66395	0.798126	0.762379	1.24891	-0.908965	-0.666508	0.715569	-0.726549	-0.998918	-1.29562	0	0	0	0	0	0	0	0	0	0	0	0	0	0	0	0	0
0	0	0	-5.14045	0.658858	-1.60727	-0.558875	1.05348	0.8128	-1.69606	0.663088	0.667533	-0.387832	-0.507928	-2.11544	1.31175	-1.36026	1.00219	-1.58623	-0.576275	0.683932	0.0441505	-0.742344	0	0	0	0	0	0	0	0	0	0	0	0	0	0	0	0	0
0	0	0	0	-3.39146	-2.48986	1.42123	1.83135	0.0779313	-0.232139	1.19246	0.17228	-0.626478	-0.469384	0.371131	-1.54617	0.689353	-1.8504	-0.484656	1.24638	-0.650477	-0.591331	0.174385	0	0	0	0	0	0	0	0	0	0	0	0	0	0	0	0	0
0	0	0	0	0	3.77304	1.51349	0.664432	-0.400162	0.321949	-0.59158	-2.65104	0.193735	0.215526	0.103968	0.641464	0.396371	0.0639397	-1.86043	0.672534	-0.736048	1.05113	0.615389	0	0	0	0	0	0	0	0	0	0	0	0	0	0	0	0	0
0	0	0	0	0	0	-4.27504	-0.0234712	-0.4867	1.14091	-0.660346	-1.18263	-0.504049	0.432689	0.912728	-0.718357	0.739406	-0.318393	0.634295	-0.967204	-0.384536	0.156028	0.391453	0	0	0	0	0	0	0	0	0	0	0	0	0	0	0	0	0
0	0	0	0	0	0	0	-3.12333	0.563526	1.125	0.958449	-0.000604388	1.64881	1.56305	0.22713	0.716347	0.2858	0.423305	0.781499	-0.258873	-0.946932	2.28009	0.364215	0	0	0	0	0	0	0	0	0	0	0	0	0	0	0	0	0
0	0	0	0	0	0	0	0	3.13364	-0.199069	0.700885	-0.019278	0.834228	-0.689163	-0.454353	-1.1321	-1.53268	0.56578	2.57328	1.4315	-1.05681	0.765818	2.27974	0	0	0	0	0	0	0	0	0	0	0	0	0	0	0	0	0
0	0	0	0	0	0	0	0	0	-3.00513	-1.11446	-0.952783	-0.286507	0.111226	-1.29233	-0.0553819	0.784078	1.02237	0.423921	0.424257	-0.481607	-0.940647	-1.84061	0	0	0	0	0	0	0	0	0	0	0	0	0	0	0	0	0
0	0	0	0	0	0	0	0	0	0	-3.7817	1.89761	-0.567693	0.44231	1.04757	-0.460682	-0.00854431	0.514278	-0.924114	1.58538	-0.380776	0.920604	0.363116	0	0	0	0	0	0	0	0	0	0	0	0	0	0	0	0	0
0	0	0	0	0	0	0	0	0	0	0	2.6864	1.12181	-0.332122	-0.275342	0.80634	-0.616896	-0.0528284	0.379433	-0.693074	0.418951	-0.710422	-1.97698	0	0	0	0	0	0	0	0	0	0	0	0	0	0	0	0	0
0	0	0	0	0	0	0	0	0	0	0	0	-2.68816	1.10637	-0.728572	-1.77454	-1.88342	0.988859	0.374408	0.822869	0.257163	-1.0286	-0.710936	0	0	0	0	0	0	0	0	0	0	0	0	0	0	0	0	0
0	0	0	0	0	0	0	0	0	0	0	0	0	3.0276	-1.07429	-0.250908	-0.653441	0.904986	0.363298	0.22678	1.46056	-0.222724	-0.660058	0	0	0	0	0	0	0	0	0	0	0	0	0	0	0	0	0
0	0	0	0	0	0	0	0	0	0	0	0	0	0	-2.4273	-0.341718	0.890979	-0.00310417	0.47799	0.749334	-0.0566517	-0.69343	0.989302	0	0	0	0	0	0	0	0	0	0	0	0	0	0	0	0	0
0	0	0	0	0	0	0	0	0	0	0	0	0	0	0	-1.90947	-0.404992	-0.321206	-1.40041	0.356551	1.44259	0.594406	0.293072	0	0	0	0	0	0	0	0	0	0	0	0	0	0	0	0	0
0	0	0	0	0	0	0	0	0	0	0	0	0	0	0	0	-2.84302	0.208401	-0.755661	1.10444	-0.513796	0.277709	-0.998216	0	0	0	0	0	0	0	0	0	0	0	0	0	0	0	0	0
0	0	0	0	0	0	0	0	0	0	0	0	0	0	0	0	0	2.20237	-0.465281	0.388985	-0.878752	0.113515	0.188694	0	0	0	0	0	0	0	0	0	0	0	0	0	0	0	0	0
0	0	0	0	0	0	0	0	0	0	0	0	0	0	0	0	0	0	-2.16887	-0.633727	0.0512944	0.546796	1.08807	0	0	0	0	0	0	0	0	0	0	0	0	0	0	0	0	0
0	0	0	0	0	0	0	0	0	0	0	0	0	0	0	0	0	0	0	-1.23963	0.0489223	0.379554	0.461454	0	0	0	0	0	0	0	0	0	0	0	0	0	0	0	0	0
0	0	0	0	0	0	0	0	0	0	0	0	0	0	0	0	0	0	0	0	1.0911	-0.824795	-1.69143	0	0	0	0	0	0	0	0	0	0	0	0	0	0	0	0	0
0	0	0	0	0	0	0	0	0	0	0	0	0	0	0	0	0	0	0	0	0	-0.397527	-0.107281	0	0	0	0	0	0	0	0	0	0	0	0	0	0	0	0	0
0	0	0	0	0	0	0	0	0	0	0	0	0	0	0	0	0	0	0	0	0	0	1.26333	0	0	0	0	0	0	0	0	0	0	0	0	0	0	0	0	0
0	0	0	0	0	0	0	0	0	0	0	0	0	0	0	0	0	0	0	0	0	0	0	0	0	0	0	0	0	0	0	0	0	0	0	0	0	0	0	0
5.71272	0.193461	1.42755	0.437482	-0.45494	0.689796	-0.846577	2.90845	-0.612521	1.53487	1.02147	0.564305	0.549201	0.772404	0.673636	-1.40588	-0.146622	-2.4497	0.776543	0.994788	1.13227	0.427431	-0.911725	-0.349047	0	0	0	0	0	0	0	0	0	0	0	0	0	0	0	0
0	-5.08262	-2.21246	0.374942	-0.962495	-0.748686	-0.899468	1.64022	-0.844956	-0.297655	0.452846	-0.040655	0.31044	0.248355	-0.356432	0.0666112	-0.0346273	-0.77949	-1.06748	-0.613898	-0.655274	0.967837	-0.736391	1.70514	0	0	0	0	0	0	0	0	0	0	0	0	0	0	0	0
0	0	4.70865	0.508375	0.718924	0.237466	0.441651	-0.601728	0.471109	-0.741805	0.333427	0.0470837	1.67715	-0.358116	0.975882	1.14302	-1.26015	1.56807	-0.724731	0.581828	0.135378	0.994456	1.06068	0.191491	0	0	0	0	0	0	0	0	0	0	0	0	0	0	0	0
0	0	0	-5.77832	0.0114156	-1.08718	0.79915	0.0171877	-0.815402	0.276955	-0.137674	0.274754	-1.02005	0.528038	-0.991941	-1.24176	-0.591848	-1.10187	0.454441	0.551563	0.757079	1.74922	0.608382	1.72646	0	0	0	0	0	0	0	0	0	0	0	0	0	0	0	0
0	0	0	0	-4.17988	0.656765	0.032218	0.420294	0.695334	-2.7274	1.37712	0.813098	-1.0498	-0.856415	0.116662	-1.253	0.37505	-0.523653	-0.0162273	-0.12613	-1.7884	0.865075	0.702048	-0.946636	0	0	0	0	0	0	0	0	0	0	0	0	0	0	0	0
0	0	0	0	0	4.70643	-0.102819	1.41394	-0.0253643	0.40545	-0.0779961	-1.01702	0.559355	-0.525039	-0.101929	0.12428	-0.754861	1.1766	-1.56318	-0.464566	-0.945521	1.29146	0.425218	-0.580943	0	0	0	0	0	0	0	0	0	0	0	0	0	0	0	0
0	0	0	0	0	0	-4.3919	-0.343744	-0.687437	-0.250133	1.33275	0.270531	1.28595	1.23843	0.672234	0.924791	1.45612	0.261357	-0.930406	1.10463	1.28262	-1.0365	-0.0365697	-2.82446	0	0	0	0	0	0	0	0	0	0	0	0	0	0	0	0
0	0	0	0	0	0	0	3.29782	0.127298	-1.22973	0.0688686	2.19626	1.34745	-0.0126715	1.1589	-0.360817	0.570448	-1.32894	0.852926	-0.993671	-0.842152	-0.814152	0.679571	0.305997	0	0	0	0	0	0	0	0	0	0	0	0	0	0	0	0
0	0	0	0	0	0	0	0	4.27135	0.193014	0.783155	-1.15937	-1.71049	0.0666682	0.464201	-1.04912	-1.47013	1.31534	0.301687	-0.995337	0.928663	0.806138	-0.615985	-1.38559	0	0	0	0	0	0	0	0	0	0	0	0	0	0	0	0
0	0	0	0	0	0	0	0	0	-2.97641	-0.112019	-0.380708	1.15963	0.764439	-0.563658	-0.787536	-0.426495	-0.33484	-0.0553768	0.342547	0.954343	1.79019	-0.906181	-1.01476	0	0	0	0	0	0	0	0	0	0	0	0	0	0	0	0
0	0	0	0	0	0	0	0	0	0	3.40478	-0.27995	0.363747	0.87926	0.274755	-0.662676	0.2248	1.03931	-0.105439	0.281561	0.890171	-0.308655	-0.646009	-0.497481	0	0	0	0	0	0	0	0	0	0	0	0	0	0	0	0
0	0	0	0	0	0	0	0	0	0	0	3.79635	0.748517	0.00319018	-0.0219218	0.23022	0.874892	1.40804	1.05511	0.421966	-0.105391	0.50202	-0.0500134	-0.807214	0	0	0	0	0	0	0	0	0	0	0	0	0	0	0	0
0	0	0	0	0	0	0	0	0	0	0	0	-2.74139	-1.02384	-0.617045	-0.124533	0.421874	-0.259443	-1.22622	0.280528	0.0281161	1.18223	-0.0773078	0.54239	0	0	0	0	0	0	0	0	0	0	0	0	0	0	0	0
0	0	0	0	0	0	0	0	0	0	0	0	0	3.31014	-0.208046	-1.1807	0.513119	-0.547877	1.17024	0.966708	-1.65887	-0.212862	-0.941101	0.321905	0	0	0	0	0	0	0	0	0	0	0	0	0	0	0	0
0	0	0	0	0	0	0	0	0	0	0	0	0	0	-3.41805	-0.562724	-1.15992	0.475733	0.0651279	1.61754	-0.530439	0.548963	0.234385	-0.979685	0	0	0	0	0	0	0	0	0	0	0	0	0	0	0	0
0	0	0	0	0	0	0	0	0	0	0	0	0	0	0	2.62418	-0.85325	0.572657	1.92473	-0.162055	0.577719	-0.383077	-0.0212323	0.579774	0	0	0	0	0	0	0	0	0	0	0	0	0	0	0	0
0	0	0	0	0	0	0	0	0	0	0	0	0	0	0	0	3.50792	0.15113	-0.158351	-0.618283	-0.335161	1.50558	-0.62784	-0.111785	0	0	0	0	0	0	0	0	0	0	0	0	0	0	0	0
0	0	0	0	0	0	0	0	0	0	0	0	0	0	0	0	0	2.28817	-2.05828	-1.00485	1.05475	-0.177907	-0.197085	-2.38274	0	0	0	0	0	0	0	0	0	0	0	0	0	0	0	0
0	0	0	0	0	0	0	0	0	0	0	0	0	0	0	0	0	0	-2.07094	0.907714	-1.59775	0.040085	-1.14667	1.40537	0	0	0	0	0	0	0	0	0	0	0	0	0	0	0	0
0	0	0	0	0	0	0	0	0	0	0	0	0	0	0	0	0	0	0	2.73264	1.16985	0.346957	-0.0140675	1.83296	0	0	0	0	0	0	0	0	0	0	0	0	0	0	0	0
0	0	0	0	0	0	0	0	0	0	0	0	0	0	0	0	0	0	0	0	1.57519	0.915217	0.671593	0.956676	0	0	0	0	0	0	0	0	0	0	0	0	0	0	0	0
0	0	0	0	0	0	0	0	0	0	0	0	0	0	0	0	0	0	0	0	0	-0.903792	0.130032	1.10563	0	0	0	0	0	0	0	0	0	0	0	0	0	0	0	0
0	0	0	0	0	0	0	0	0	0	0	0	0	0	0	0	0	0	0	0	0	0	-1.53472	-0.647216	0	0	0	0	0	0	0	0	0	0	0	0	0	0	0	0
0	0	0	0	0	0	0	0	0	0	0	0	0	0	0	0	0	0	0	0	0	0	0	0.0883234	0	0	0	0	0	0	0	0	0	0	0	0	0	0	0	0
0	0	0	0	0	0	0	0	0	0	0	0	0	0	0	0	0	0	0	0	0	0	0	0	0	0	0	0	0	0	0	0	0	0	0	0	0	0	0	0
-6.14153	0.0304546	-0.123838	-0.0952244	0.997585	1.39346	0.374082	0.225703	0.635567	1.15265	1.62602	0.815307	0.194765	0.176767	-0.824785	1.22837	1.59807	-0.471632	0.255864	0.912702	-0.92232	0.556251	-1.37852	1.51468	-0.304437	0	0	0	0	0	0	0	0	0	0	0	0	0	0	0
0	-4.67087	-0.762402	-1.32753	-0.59778	1.44654	0.789469	0.269737	-1.27061	1.56497	-0.662336	-0.545957	0.093742	0.20721	0.337165	-1.26098	1.47291	0.514381	-0.912635	-1.08062	1.52259	0.100728	-1.12094	0.280439	-1.71435	0	0	0	0	0	0	0	0	0	0	0	0	0	0	0
0	0	-5.00623	0.471775	0.27105	-0.979252	0.288805	-1.40238	1.26831	0.361799	-0.0311588	0.0455158	1.21623	0.0113863	0.0966354	0.283189	0.160278	-1.06976	0.851027	-1.97164	-0.0436434	0.709165	0.920961	-0.0606318	0.851463	0	0	0	0	0	0	0	0	0	0	0	0	0	0	0
0	0	0	-4.8453	1.2754	1.01398	-1.65063	0.141104	0.326075	-0.275307	1.09422	1.59772	0.74185	0.356386	0.471404	1.74962	0.684728	-0.51108	-0.125376	-0.215617	-0.536014	-0.731229	-2.07751	-0.461355	0.66606	0	0	0	0	0	0	0	0	0	0	0	0	0	0	0
0	0	0	0	3.90815	0.600407	0.644646	0.86672	-1.03481	1.00376	-1.06293	-0.0359884	-1.46463	0.620017	0.840227	-1.41407	1.07415	0.975913	0.819187	0.195436	-0.799337	-0.311887	0.455003	0.623684	-0.0435389	0	0	0	0	0	0	0	0	0	0	0	0	0	0	0
0	0	0	0	0	-4.10919	-1.04763	0.0270014	0.91626	1.97905	-0.0341396	0.81586	-2.6369	-0.676817	0.28529	-1.73586	-0.399927	0.555214	0.583651	-0.783685	0.229511	0.242107	1.82255	1.29107	1.15064	0	0	0	0	0	0	0	0	0	0	0	0	0	0	0
0	0	0	0	0	0	-4.48758	0.484893	0.792267	1.27368	-0.539984	-0.76244	0.942505	1.61484	0.134395	-2.0978	-0.863366	1.65169	-1.35341	-0.773148	0.0324594	-0.622191	-0.597917	-0.695371	-0.272284	0	0	0	0	0	0	0	0	0	0	0	0	0	0	0
0	0	0	0	0	0	0	5.19031	1.0095	0.359698	-0.301934	-0.534485	0.26316	-0.82228	2.15368	0.301698	0.28977	-0.325402	0.0559706	-0.657963	0.793062	0.614575	-0.874459	1.99439	0.733868	0	0	0	0	0	0	0	0	0	0	0	0	0	0	0
0	0	0	0	0	0	0	0	-3.42365	2.00649	0.804698	0.261805	1.00971	-1.13553	-1.24299	0.271691	2.21419	1.59528	-1.4393	0.314065	-0.278887	0.846354	-0.877365	1.7325	1.547	0	0	0	0	0	0	0	0	0	0	0	0	0	0	0
0	0	0	0	0	0	0	0	0	-2.68882	-0.595441	-1.42976	0.111223	0.302579	-0.881739	-1.78641	2.04596	-0.148528	0.136073	0.00203439	1.65155	-0.292224	1.25251	0.105474	-1.25919	0	0	0	0	0	0	0	0	0	0	0	0	0	0	0
0	0	0	0	0	0	0	0	0	0	4.20226	1.73594	0.544898	-0.182894	-0.555016	-0.775996	0.29972	0.557535	-0.518642	-0.85392	-1.16511	-0.747214	0.247004	-0.249023	0.185033	0	0	0	0	0	0	0	0	0	0	0	0	0	0	0
0	0	0	0	0	0	0	0	0	0	0	2.79625	1.7386	0.544519	-3.04488	-1.35911	-0.572049	-1.23772	-0.353859	-0.970329	0.185654	0.642062	0.689024	-0.282815	1.81134	0	0	0	0	0	0	0	0	0	0	0	0	0	0	0
0	0	0	0	0	0	0	0	0	0	0	0	-2.54813	-0.422232	-0.0116737	1.57996	1.34035	1.76971	0.460654	-1.44664	0.968423	1.20607	0.500432	0.655675	-0.432546	0	0	0	0	0	0	0	0	0	0	0	0	0	0	0
0	0	0	0	0	0	0	0	0	0	0	0	0	2.28594	0.303534	0.0735905	0.689422	1.27613	-0.0214207	-0.632043	-0.533901	1.10502	1.56636	0.865614	0.845059	0	0	0	0	0	0	0	0	0	0	0	0	0	0	0
0	0	0	0	0	0	0	0	0	0	0	0	0	0	-2.65053	0.701011	0.151041	-1.58583	0.380031	-0.339851	-1.04427	-1.00935	-0.914424	-0.638596	-0.0172766	0	0	0	0	0	0	0	0	0	0	0	0	0	0	0
0	0	0	0	0	0	0	0	0	0	0	0	0	0	0	-2.4992	0.634687	-1.0963	0.287758	-1.41899	1.02421	0.769636	0.110682	1.0239	0.588065	0	0	0	0	0	0	0	0	0	0	0	0	0	0	0
0	0	0	0	0	0	0	0	0	0	0	0	0	0	0	0	-3.06489	0.250064	-1.51142	-0.135973	1.45899	0.532785	-1.45173	-1.02933	-0.215731	0	0	0	0	0	0	0	0	0	0	0	0	0	0	0
0	0	0	0	0	0	0	0	0	0	0	0	0	0	0	0	0	2.51937	2.2177	-0.105555	0.797382	-1.67086	0.694046	-1.32478	1.33208	0	0	0	0	0	0	0	0	0	0	0	0	0	0	0
0	0	0	0	0	0	0	0	0	0	0	0	0	0	0	0	0	0	3.3628	-1.81767	-0.03003	-1.47172	-1.31035	-0.33723	-0.593865	0	0	0	0	0	0	0	0	0	0	0	0	0	0	0
0	0	0	0	0	0	0	0	0	0	0	0	0	0	0	0	0	0	0	-2.09161	-0.667212	-1.11149	0.00295522	0.517561	0.303357	0	0	0	0	0	0	0	0	0	0	0	0	0	0	0
0	0	0	0	0	0	0	0	0	0	0	0	0	0	0	0	0	0	0	0	-1.45636	0.113845	-1.12524	0.519176	2.15454	0	0	0	0	0	0	0	0	0	0	0	0	0	0	0
0	0	0	0	0	0	0	0	0	0	0	0	0	0	0	0	0	0	0	0	0	-2.19912	1.70923	0.240166	-0.439218	0	0	0	0	0	0	0	0	0	0	0	0	0	0	0
0	0	0	0	0	0	0	0	0	0	0	0	0	0	0	0	0	0	0	0	0	0	-1.84214	-0.405332	0.643637	0	0	0	0	0	0	0	0	0	0	0	0	0	0	0
0	0	0	0	0	0	0	0	0	0	0	0	0	0	0	0	0	0	0	0	0	0	0	-1.69726	-1.10707	0	0	0	0	0	0	0	0	0	0	0	0	0	0	0
0	0	0	0	0	0	0	0	0	0	0	0	0	0	0	0	0	0	0	0	0	0	0	0	0.377839	0	0	0	0	0	0	0	0	0	0	0	0	0	0	0
0	0	0	0	0	0	0	0	0	0	0	0	0	0	0	0	0	0	0	0	0	0	0	0	0	0	0	0	0	0	0	0	0	0	0	0	0	0	0	0
-4.12614	1.49008	0.149603	-2.06578	-0.72627	-0.00092784	0.496338	0.616406	2.89354	1.1565	-1.81274	0.763429	0.499387	-0.616878	0.9258	1.06106	0.365915	1.59829	-0.861693	-1.75845	1.1506	0.400469	-0.49674	1.13967	0.772369	1.06854	0	0	0	0	0	0	0	0	0	0	0	0	0	0
0	-6.1763	0.898047	0.144662	1.41968	-0.0964929	-0.303596	0.0425106	1.35389	0.604227	0.110654	-0.437141	-0.191376	-0.463455	1.15843	0.758759	0.578812	1.55759	-1.09977	-1.43842	-0.328704	0.95725	-0.104198	-0.87949	0.315481	0.262976	0	0	0	0	0	0	0	0	0	0	0	0	0	0
0	0	5.81977	-0.653937	1.29304	1.90051	-0.417804	-0.294558	-0.791612	-1.8815	0.153807	1.27838	0.700918	0.410943	-0.354942	-0.0894325	1.95314	1.07829	-0.228362	-0.324187	-1.29643	0.550841	0.942822	0.946098	-0.360034	0.504725	0	0	0	0	0	0	0	0	0	0	0	0	0	0
0	0	0	-4.20491	-0.654529	-1.303	1.46305	-0.307835	0.995764	-1.06245	0.569628	-1.579	2.15155	-0.843254	0.56457	1.12192	0.776219	0.497819	1.8869	0.408791	0.951343	-1.1886	1.13187	-2.46895	-0.0621902	-2.0469	0	0	0	0	0	0	0	0	0	0	0	0	0	0
0	0	0	0	4.81679	0.464039	0.150233	-0.676887	-0.855468	0.857332	0.0820459	1.85547	-0.00317172	-0.120057	1.09269	2.49696	-0.873727	-0.380115	0.489287	0.0413687	-0.406413	0.660512	2.06444	-0.212109	-0.470433	1.50815	0	0	0	0	0	0	0	0	0	0	0	0	0	0
0	0	0	0	0	4.59976	0.0883039	1.23007	1.10567	0.941639	-2.6591	0.730829	0.256222	0.169617	0.341973	1.86179	-0.0554028	-0.182109	-1.45538	-0.0335299	0.422193	1.49056	-0.0516939	1.86769	1.69329	0.467439	0	0	0	0	0	0	0	0	0	0	0	0	0	0
0	0	0	0	0	0	4.75876	-1.81567	0.837977	-0.281267	-0.0780829	1.447	-0.453847	-0.370973	0.88428	-1.24845	0.00380238	-1.23819	-1.40094	-1.06407	-1.20022	0.935019	0.372557	-1.26641	1.51754	-0.9072	0	0	0	0	0	0	0	0	0	0	0	0	0	0
0	0	0	0	0	0	0	-4.72538	-0.91079	-1.33502	-1.07377	0.552368	-1.8045	0.495589	-0.0859267	0.709697	-0.493735	-0.481829	0.545685	-0.876865	0.112229	2.17435	0.12622	-0.597995	-0.636598	1.52333	0	0	0	0	0	0	0	0	0	0	0	0	0	0
0	0	0	0	0	0	0	0	-5.88784	-1.01831	-0.0971311	0.269185	-1.06389	0.214523	-0.608357	0.201817	-0.0159207	-1.29581	1.8394	0.710106	0.247273	0.870003	-0.22458	-0.504692	1.9661	0.50594	0	0	0	0	0	0	0	0	0	0	0	0	0	0
0	0	0	0	0	0	0	0	0	-4.06866	0.859673	1.05851	0.520301	-0.184794	0.704147	1.4836	-0.445333	-1.03896	-0.521894	-0.129393	0.360693	-0.428081	0.795577	0.506674	1.24268	0.200732	0	0	0	0	0	0	0	0	0	0	0	0	0	0
0	0	0	0	0	0	0	0	0	0	4.07142	-0.520679	2.22149	0.850241	-1.07806	0.0686329	-1.37522	0.406174	-0.405591	1.23608	-0.0599304	0.187766	1.86839	1.097	0.00186785	0.274108	0	0	0	0	0	0	0	0	0	0	0	0	0	0
0	0	0	0	0	0	0	0	0	0	0	2.83892	-0.318538	-0.269225	-0.20632	-0.102835	2.48246	0.039347	-0.995375	0.0275189	0.806295	-0.0889377	-0.0446566	0.726837	0.119759	1.79229	0	0	0	0	0	0	0	0	0	0	0	0	0	0
0	0	0	0	0	0	0	0	0	0	0	0	3.60032	0.178591	-1.41861	0.0951665	2.04135	-0.497745	-1.17199	1.23192	-0.0447548	-0.0679165	0.617075	-1.21842	-0.782842	0.332235	0	0	0	0	0	0	0	0	0	0	0	0	0	0
0	0	0	0	0	0	0	0	0	0	0	0	0	4.09296	0.273309	-0.0387657	1.21562	-1.97665	0.39667	0.641057	-1.35691	0.636052	-0.6235	-0.437133	0.847239	-0.849814	0	0	0	0	0	0	0	0	0	0	0	0	0	0
0	0	0	0	0	0	0	0	0	0	0	0	0	0	-3.89001	0.778096	-0.868751	1.08956	2.10842	-1.59318	0.317239	0.101525	0.94552	2.61923	1.72158	-0.1204	0	0	0	0	0	0	0	0	0	0	0	0	0	0
0	0	0	0	0	0	0	0	0	0	0	0	0	0	0	3.01527	-0.230876	0.566959	1.1192	-0.833971	-0.708382	0.807778	1.28751	-0.897437	0.829452	-0.13462	0	0	0	0	0	0	0	0	0	0	0	0	0	0
0	0	0	0	0	0	0	0	0	0	0	0	0	0	0	0	3.38218	-1.76275	1.4637	0.416779	-1.70896	0.551294	0.136369	0.754533	0.285254	-0.332449	0	0	0	0	0	0	0	0	0	0	0	0	0	0
0	0	0	0	0	0	0	0	0	0	0	0	0	0	0	0	0	-2.89102	0.536308	-0.300646	1.1217	-0.571726	0.0375807	1.88567	0.74315	1.09601	0	0	0	0	0	0	0	0	0	0	0	0	0	0
0	0	0	0	0	0	0	0	0	0	0	0	0	0	0	0	0	0	-3.53408	0.140546	-1.42314	-0.434588	0.645868	-0.50596	0.982103	0.2196	0	0	0	0	0	0	0	0	0	0	0	0	0	0
0	0	0	0	0	0	0	0	0	0	0	0	0	0	0	0	0	0	0	3.77614	-0.313567	1.52232	-0.490226	1.21389	0.69801	0.229969	0	0	0	0	0	0	0	0	0	0	0	0	0	0
0	0	0	0	0	0	0	0	0	0	0	0	0	0	0	0	0	0	0	0	-1.89308	-2.18099	0.41941	-1.2246	-0.195504	-1.30574	0	0	0	0	0	0	0	0	0	0	0	0	0	0
0	0	0	0	0	0	0	0	0	0	0	0	0	0	0	0	0	0	0	0	0	0.956959	-0.0860585	0.278951	0.166309	1.68417	0	0	0	0	0	0	0	0	0	0	0	0	0	0
0	0	0	0	0	0	0	0	0	0	0	0	0	0	0	0	0	0	0	0	0	0	-0.687561	-1.68042	0.596229	0.899133	0	0	0	0	0	0	0	0	0	0	0	0	0	0
0	0	0	0	0	0	0	0	0	0	0	0	0	0	0	0	0	0	0	0	0	0	0	0.815124	-1.11499	-1.35123	0	0	0	0	0	0	0	0	0	0	0	0	0	0
0	0	0	0	0	0	0	0	0	0	0	0	0	0	0	0	0	0	0	0	0	0	0	0	0.738131	-1.15626	0	0	0	0	0	0	0	0	0	0	0	0	0	0
0	0	0	0	0	0	0	0	0	0	0	0	0	0	0	0	0	0	0	0	0	0	0	0	0	-1.04255	0	0	0	0	0	0	0	0	0	0	0	0	0	0
0	0	0	0	0	0	0	0	0	0	0	0	0	0	0	0	0	0	0	0	0	0	0	0	0	0	0	0	0	0	0	0	0	0	0	0	0	0	0	0
-4.74459	1.62734	-0.192453	-0.545805	1.04712	1.47749	-0.251174	-0.389265	-0.071568	-1.36226	3.42229	1.00427	-0.486713	1.33454	1.88636	0.0668717	0.448498	1.0931	-1.16377	-0.80056	-1.04979	-1.07876	0.365337	0.74288	0.446023	0.0800698	-0.402621	0	0	0	0	0	0	0	0	0	0	0	0	0
0	5.73547	-0.642025	0.736501	-0.0385664	0.716438	0.36379	-0.56126	-0.531597	-0.2728	-0.94327	1.26109	-0.525588	0.0903594	2.0861	-1.73448	-0.485101	1.07096	0.0997902	0.194503	-0.523137	-0.733058	1.2781	-1.04557	1.08571	1.13101	-1.04181	0	0	0	0	0	0	0	0	0	0	0	0	0
0	0	5.96938	-1.41744	0.544095	-1.06086	0.179879	0.432425	-0.344669	0.454323	-0.0135594	-0.528846	0.931001	1.79418	-1.40032	-2.37914	0.964151	-1.0925	-0.128217	1.31546	-0.155211	1.6289	-1.42121	-1.75259	-1.2023	0.264663	-2.6412	0	0	0	0	0	0	0	0	0	0	0	0	0
0	0	0	-5.13405	0.612729	-3.17436	-0.467345	-0.228959	0.0437778	-1.71323	0.544127	-1.19934	-1.073	1.04639	-0.0103783	0.0838743	-1.01844	1.06478	-0.27101	0.689562	0.122711	1.64106	-0.530052	0.278889	-0.906299	2.3453	-0.261763	0	0	0	0	0	0	0	0	0	0	0	0	0
0	0	0	0	-4.63302	-0.537592	-0.29524	0.347901	0.836265	0.865166	-0.926586	-0.10049	1.09508	-1.24213	-0.837517	-1.22743	0.967625	0.510452	-0.640135	0.457852	-0.598952	-0.915633	0.486716	-2.68416	0.679192	0.280586	1.04034	0	0	0	0	0	0	0	0	0	0	0	0	0
0	0	0	0	0	-5.431	0.5615	-1.69881	-0.678654	-0.972221	0.401806	-1.47116	-0.290768	-1.62863	0.380059	1.36709	-1.4157	-0.627465	1.21802	0.955254	0.279132	0.817777	-0.352732	0.042109	-0.288335	-0.217025	-1.79507	0	0	0	0	0	0	0	0	0	0	0	0	0
0	0	0	0	0	0	-3.53338	-1.30017	-1.28283	0.941286	0.19842	0.218216	0.262776	0.0895413	0.505865	-0.953006	0.592593	-0.548526	0.936767	-0.0518738	0.806533	0.168455	-0.612821	-0.127988	0.664489	0.313535	1.27837	0	0	0	0	0	0	0	0	0	0	0	0	0
0	0	0	0	0	0	0	4.55127	0.496908	0.918332	-0.30427	0.0970246	2.70305	1.15805	0.0562479	-1.18642	-1.10836	0.788976	0.420398	-0.0142806	-0.256897	0.430588	1.20214	-2.06324	-0.409448	1.1659	0.130288	0	0	0	0	0	0	0	0	0	0	0	0	0
0	0	0	0	0	0	0	0	4.02134	-0.915176	-0.734286	0.956266	0.741511	-0.0625282	0.550731	-2.11275	-0.406813	-0.758737	-0.42269	0.742945	0.309465	-1.0921	-0.227511	-0.353141	-1.14395	0.717756	-1.82586	0	0	0	0	0	0	0	0	0	0	0	0	0
0	0	0	0	0	0	0	0	0	-4.98921	-0.549764	1.04134	2.09211	0.26234	1.19426	0.282473	-0.689028	-0.912845	0.855077	0.114483	1.59702	1.76936	1.02567	-0.421339	-0.505837	-0.248038	-0.361042	0	0	0	0	0	0	0	0	0	0	0	0	0
0	0	0	0	0	0	0	0	0	0	-3.89465	0.147512	1.09447	-0.888864	-0.808992	-0.0962858	-1.46316	1.00075	-1.58198	-0.369527	-0.156432	1.49639	-0.110308	-0.627973	1.7164	-0.723933	-0.320703	0	0	0	0	0	0	0	0	0	0	0	0	0
0	0	0	0	0	0	0	0	0	0	0	3.77255	0.72013	0.962808	0.354885	-0.694664	0.138111	-0.72975	1.78547	-0.547142	0.00927974	0.791324	-1.23287	-1.07823	-0.0070952	1.05526	2.25198	0	0	0	0	0	0	0	0	0	0	0	0	0
0	0	0	0	0	0	0	0	0	0	0	0	-4.29248	-0.445217	0.0745739	0.537799	1.12095	-0.452037	0.164489	-0.0211586	0.259088	-0.515075	-0.0762482	-0.505012	0.415751	0.839069	-1.27306	0	0	0	0	0	0	0	0	0	0	0	0	0
0	0	0	0	0	0	0	0	0	0	0	0	0	-3.79148	-0.129868	-1.04595	-0.146863	-0.416177	-0.239808	1.54579	-0.324839	0.295755	-0.139921	0.25768	-0.0428893	-0.047329	-0.916632	0	0	0	0	0	0	0	0	0	0	0	0	0
0	0	0	0	0	0	0	0	0	0	0	0	0	0	-2.85719	-0.408503	-0.461303	1.11418	1.57649	0.664989	-0.067811	-0.254138	-1.06309	0.355879	-0.983657	-1.21191	-0.752086	0	0	0	0	0	0	0	0	0	0	0	0	0
0	0	0	0	0	0	0	0	0	0	0	0	0	0	0	3.65675	-1.0756	0.393047	-0.990793	-0.0909709	-1.89514	-0.126905	-0.113799	1.45475	-0.893229	1.40728	-0.615466	0	0	0	0	0	0	0	0	0	0	0	0	0
0	0	0	0	0	0	0	0	0	0	0	0	0	0	0	0	-3.5074	0.524194	-0.562767	-0.185434	2.57552	1.09709	-1.43208	0.339797	-0.354073	-1.12377	-0.578784	0	0	0	0	0	0	0	0	0	0	0	0	0
0	0	0	0	0	0	0	0	0	0	0	0	0	0	0	0	0	-4.13501	0.87999	-0.189895	-1.82342	1.69212	-0.588263	1.2421	-0.801896	0.498364	0.288985	0	0	0	0	0	0	0	0	0	0	0	0	0
0	0	0	0	0	0	0	0	0	0	0	0	0	0	0	0	0	0	-2.08416	-0.41668	-0.372054	0.854764	0.789223	-0.459994	0.591805	-0.0868273	1.16478	0	0	0	0	0	0	0	0	0	0	0	0	0
0	0	0	0	0	0	0	0	0	0	0	0	0	0	0	0	0	0	0	-3.34016	-0.0306208	0.55083	0.898384	0.756813	-0.746911	-1.43306	-1.50383	0	0	0	0	0	0	0	0	0	0	0	0	0
0	0	0	0	0	0	0	0	0	0	0	0	0	0	0	0	0	0	0	0	-3.02067	-0.610069	0.839762	-0.406114	0.0530177	0.354976	0.376636	0	0	0	0	0	0	0	0	0	0	0	0	0
0	0	0	0	0	0	0	0	0	0	0	0	0	0	0	0	0	0	0	0	0	2.59767	1.43648	-1.83657	0.639368	-0.93186	2.2838	0	0	0	0	0	0	0	0	0	0	0	0	0
0	0	0	0	0	0	0	0	0	0	0	0	0	0	0	0	0	0	0	0	0	0	-1.01406	1.33558	-0.320377	-0.769353	0.0140863	0	0	0	0	0	0	0	0	0	0	0	0	0
0	0	0	0	0	0	0	0	0	0	0	0	0	0	0	0	0	0	0	0	0	0	0	-1.43189	-1.06513	-1.24694	-0.420973	0	0	0	0	0	0	0	0	0	0	0	0	0
0	0	0	0	0	0	0	0	0	0	0	0	0	0	0	0	0	0	0	0	0	0	0	0	0.835164	0.0971661	0.568252	0	0	0	0	0	0	0	0	0	0	0	0	0
0	0	0	0	0	0	0	0	0	0	0	0	0	0	0	0	0	0	0	0	0	0	0	0	0	-2.70813	0.502514	0	0	0	0	0	0	0	0	0	0	0	0	0
0	0	0	0	0	0	0	0	0	0	0	0	0	0	0	0	0	0	0	0	0	0	0	0	0	0	0.624949	0	0	0	0	0	0	0	0	0	0	0	0	0
0	0	0	0	0	0	0	0	0	0	0	0	0	0	0	0	0	0	0	0	0	0	0	0	0	0	0	0	0	0	0	0	0	0	0	0	0	0	0	0
-5.06755	-1.44896	1.31438	1.79282	0.521961	-0.15445	0.14758	0.758346	0.717188	0.355893	-0.559898	-0.0751093	0.288103	0.155329	-0.273313	-0.133491	-1.5038	-0.586734	-1.05437	-0.0391503	0.168039	0.252528	0.705344	-0.409324	-0.328854	0.376801	0.593183	0.202261	0	0	0	0	0	0	0	0	0	0	0	0
0	5.67549	0.482697	1.31876	-0.238746	-2.53964	0.536751	-0.118201	-0.359917	0.477354	-2.52198	0.111903	-0.948782	0.878935	-2.14226	0.937771	-0.0771058	-1.37873	-0.885695	1.742	-0.74859	-0.36581	0.334379	-0.00832325	-1.97165	-1.00762	1.50172	-0.223451	0	0	0	0	0	0	0	0	0	0	0	0
0	0	-6.60996	-1.15665	0.221617	0.415322	-0.0110879	0.745838	0.272466	-0.309382	-1.74599	-2.25551	1.352	-0.867531	0.31169	1.13933	0.802269	-0.46823	1.03496	1.4643	-2.36926	-0.157481	-0.208866	-0.646735	-1.61731	0.655249	0.65692	-0.199445	0	0	0	0	0	0	0	0	0	0	0	0
0	0	0	-4.8781	0.814949	-0.0740195	1.55531	0.890825	0.19478	0.162292	1.11229	-0.453218	-0.172958	0.185162	-1.37448	0.223056	0.519019	-0.878526	2.08222	0.496281	0.00296783	0.176777	0.00431355	0.773459	-2.26691	-0.637641	-0.0480937	0.342125	0	0	0	0	0	0	0	0	0	0	0	0
0	0	0	0	-5.23276	1.5532	-0.172991	-0.290807	0.531026	-0.0279501	1.63601	0.341868	-0.90255	-1.47761	2.72952	0.836897	-0.077639	-0.137706	0.0450752	-0.531708	-0.339525	-1.60058	0.834351	-0.457658	1.12467	-0.492303	-0.0318374	-1.89448	0	0	0	0	0	0	0	0	0	0	0	0
0	0	0	0	0	5.05125	-0.817425	-0.480474	-1.52747	0.130013	0.180355	-1.07227	-0.507254	1.62055	0.362734	-1.1804	-1.08555	-0.570584	0.491257	0.0874961	-1.49788	0.457884	-0.972625	-0.816535	-0.719443	-1.49573	-1.10323	-1.07547	0	0	0	0	0	0	0	0	0	0	0	0
0	0	0	0	0	0	-5.30361	0.530295	1.23059	1.99442	1.68051	-0.214184	0.943618	0.336957	0.445273	-2.34662	0.331986	-0.058542	-0.360921	0.0523437	-0.833601	-0.442817	0.187591	0.868178	-2.82235	-1.08816	0.718863	0.638208	0	0	0	0	0	0	0	0	0	0	0	0
0	0	0	0	0	0	0	4.62007	-0.277234	0.646302	1.54385	-0.521106	-1.27577	0.890902	0.79791	-0.592376	0.121571	0.956105	1.58506	0.464963	-0.00108759	1.17313	0.805577	-1.99588	0.291226	0.415836	0.642251	0.501778	0	0	0	0	0	0	0	0	0	0	0	0
0	0	0	0	0	0	0	0	4.14495	0.0919872	-1.73408	-0.0455953	0.0215235	0.375929	-0.400781	-0.654751	1.08538	-0.248278	0.591538	-0.4167	-0.207689	1.89753	-0.834707	-0.591183	0.473614	-0.821271	-1.88032	-0.67763	0	0	0	0	0	0	0	0	0	0	0	0
0	0	0	0	0	0	0	0	0	-5.39502	0.725816	0.321282	-1.11012	-1.69688	-0.115086	1.14978	-0.548312	0.0416669	0.109665	1.18469	0.0308563	0.464197	0.336774	-1.16791	-0.0109522	-1.5366	0.382558	0.999491	0	0	0	0	0	0	0	0	0	0	0	0
0	0	0	0	0	0	0	0	0	0	3.24549	1.17435	-0.342367	0.297764	-0.361034	0.491157	-0.524005	0.204548	-0.52983	0.403395	-1.05103	0.618876	-1.29414	0.542739	2.57656	0.797395	0.433038	-0.475938	0	0	0	0	0	0	0	0	0	0	0	0
0	0	0	0	0	0	0	0	0	0	0	-3.43965	-0.110345	-0.701376	0.884843	0.981476	0.351519	-1.73842	-0.719939	0.0100962	-1.748	1.33311	0.243322	-1.12679	0.0138248	-0.578323	-0.643741	-1.23224	0	0	0	0	0	0	0	0	0	0	0	0
0	0	0	0	0	0	0	0	0	0	0	0	4.18011	-0.368174	-0.641983	-0.988167	-0.901189	0.0704375	-1.02033	1.87965	-1.02615	0.426082	-1.54417	0.0644754	1.49715	1.46206	0.281239	0.577954	0	0	0	0	0	0	0	0	0	0	0	0
0	0	0	0	0	0	0	0	0	0	0	0	0	-3.85183	1.08991	0.359334	-0.472613	-0.446876	-1.01183	1.17088	0.118721	-0.402604	0.643663	1.95712	-0.715148	0.464764	-0.119809	1.25514	0	0	0	0	0	0	0	0	0	0	0	0
0	0	0	0	0	0	0	0	0	0	0	0	0	0	3.34947	0.801108	1.25094	0.419631	0.065431	-0.645745	0.22152	-0.467196	2.80572	-2.17707	0.150691	2.34428	-1.24841	0.0381538	0	0	0	0	0	0	0	0	0	0	0	0
0	0	0	0	0	0	0	0	0	0	0	0	0	0	0	2.31929	0.0441682	-0.52176	-0.572131	-0.605187	0.265975	-0.857799	-0.362619	0.0490055	-1.01133	0.857131	0.0534035	0.992945	0	0	0	0	0	0	0	0	0	0	0	0
0	0	0	0	0	0	0	0	0	0	0	0	0	0	0	0	2.48996	-1.54533	0.734615	-0.384807	-0.613198	0.103117	0.468817	0.927099	0.829706	0.0318982	0.295252	1.07034	0	0	0	0	0	0	0	0	0	0	0	0
0	0	0	0	0	0	0	0	0	0	0	0	0	0	0	0	0	3.62045	1.56698	-1.17185	0.781979	-1.95882	-0.331004	-0.0448435	1.23837	-0.549845	-0.103548	-0.927423	0	0	0	0	0	0	0	0	0	0	0	0
0	0	0	0	0	0	0	0	0	0	0	0	0	0	0	0	0	0	1.72469	-0.411093	1.68875	-0.0878443	1.41648	0.553074	0.854269	-0.333635	-0.296996	0.232481	0	0	0	0	0	0	0	0	0	0	0	0
0	0	0	0	0	0	0	0	0	0	0	0	0	0	0	0	0	0	0	-3.6779	-0.415408	-0.652364	-0.860893	-0.4758	0.504805	1.10342	-0.807675	0.983416	0	0	0	0	0	0	0	0	0	0	0	0
0	0	0	0	0	0	0	0	0	0	0	0	0	0	0	0	0	0	0	0	-2.48435	-0.493049	1.74696	0.649303	0.520674	0.810684	0.248081	-1.63815	0	0	0	0	0	0	0	0	0	0	0	0
0	0	0	0	0	0	0	0	0	0	0	0	0	0	0	0	0	0	0	0	0	3.1367	-1.14296	0.607178	0.279653	0.57244	-0.309599	-0.385027	0	0	0	0	0	0	0	0	0	0	0	0
0	0	0	0	0	0	0	0	0	0	0	0	0	0	0	0	0	0	0	0	0	0	2.70801	-0.213103	0.0924518	0.262881	-1.02582	-1.13464	0	0	0	0	0	0	0	0	0	0	0	0
0	0	0	0	0	0	0	0	0	0	0	0	0	0	0	0	0	0	0	0	0	0	0	1.27538	1.20365	-1.52838	-1.07628	-0.621746	0	0	0	0	0	0	0	0	0	0	0	0
0	0	0	0	0	0	0	0	0	0	0	0	0	0	0	0	0	0	0	0	0	0	0	0	1.95547	0.211358	-0.0767468	1.56551	0	0	0	0	0	0	0	0	0	0	0	0
0	0	0	0	0	0	0	0	0	0	0	0	0	0	0	0	0	0	0	0	0	0	0	0	0	2.82045	-1.20567	1.69484	0	0	0	0	0	0	0	0	0	0	0	0
0	0	0	0	0	0	0	0	0	0	0	0	0	0	0	0	0	0	0	0	0	0	0	0	0	0	-1.27781	-0.902984	0	0	0	0	0	0	0	0	0	0	0	0
0	0	0	0	0	0	0	0	0	0	0	0	0	0	0	0	0	0	0	0	0	0	0	0	0	0	0	0.439276	0	0	0	0	0	0	0	0	0	0	0	0
0	0	0	0	0	0	0	0	0	0	0	0	0	0	0	0	0	0	0	0	0	0	0	0	0	0	0	0	0	0	0	0	0	0	0	0	0	0	0	0
-5.51213	-0.0015871	0.710292	0.00150427	-0.171583	1.8113	2.2172	1.48333	-0.323562	1.12731	-0.0112425	-0.175136	-0.439076	-0.727	0.632898	-1.58614	0.656822	-0.527813	0.842209	-0.479712	-0.496449	0.753893	0.677929	1.16131	-1.24992	0.31973	0.45295	-1.72309	-1.32936	0	0	0	0	0	0	0	0	0	0	0
0	-4.68767	0.326416	-1.01575	0.904269	1.22401	1.216	0.665816	-0.800172	-0.599226	0.378254	0.644459	-0.578778	1.88208	0.0567401	-1.49203	-0.417578	-0.129628	-2.08569	2.11008	0.686569	0.804252	-0.093054	-0.398225	0.607139	-0.311841	0.445331	-0.293155	0.902814	0	0	0	0	0	0	0	0	0	0	0
0	0	3.12715	-2.24963	0.29392	0.0515544	-0.129088	0.68712	0.926562	0.000387854	-0.95317	-2.25443	1.29331	-1.97693	0.753516	-0.496534	-0.150307	-1.3129	0.46423	-0.640057	1.53029	-0.446193	-1.03958	0.925669	2.11658	-1.55756	0.304238	-0.78798	0.358588	0	0	0	0	0	0	0	0	0	0	0
0	0	0	-3.75864	-0.947849	0.0565999	-0.458914	1.89409	2.25073	-0.0679729	0.600551	0.322661	0.772725	-0.466683	1.36933	-1.28591	-0.633351	0.267119	1.26471	0.166336	0.606485	-0.847761	-1.00762	-0.942688	-1.11483	0.519825	-0.647456	-1.11757	-1.23777	0	0	0	0	0	0	0	0	0	0	0
0	0	0	0	-4.26269	0.0859824	-0.880887	2.82399	0.797799	-1.22533	-1.27768	0.365985	0.0653962	0.10987	-0.225478	0.172587	1.43623	0.161556	0.282575	1.26914	-0.083313	1.59178	0.557051	-0.972011	-0.848443	0.515338	-1.28992	-1.05321	0.447763	0	0	0	0	0	0	0	0	0	0	0
0	0	0	0	0	4.42697	0.100729	-1.0981	0.1178	1.10699	-0.563966	-0.386383	-0.274379	-0.285765	0.0524549	-1.22392	0.215151	0.654492	-0.323352	-0.0833263	-0.47753	-0.103641	-0.576247	-0.0838603	-1.56433	0.406899	-1.55549	0.236318	-0.966978	0	0	0	0	0	0	0	0	0	0	0
0	0	0	0	0	0	-3.71062	0.988466	0.906216	-1.49449	-0.371316	0.912064	1.54014	0.538269	-0.308827	-0.462243	1.26508	0.197701	-0.174773	0.246072	-1.15731	-0.932523	-0.974523	0.225612	-0.944403	-0.119414	-1.95812	-0.799088	1.70805	0	0	0	0	0	0	0	0	0	0	0
0	0	0	0	0	0	0	5.82054	0.13364	-0.959754	0.511544	0.751009	-0.613608	0.998606	0.551125	-0.500054	-0.587436	-0.506512	1.13443	0.705251	-0.342051	0.930528	0.348705	-1.87737	-1.5271	0.447157	0.325304	0.300634	0.460371	0	0	0	0	0	0	0	0	0	0	0
0	0	0	0	0	0	0	0	-3.6766	-1.70976	-1.14456	-0.0458828	0.100677	0.544783	-0.704704	-1.45105	0.93868	0.28534	-1.87712	0.350412	-0.0696639	-0.344005	0.230987	-0.848929	0.910767	-0.946024	-0.20711	-1.62955	-0.22965	0	0	0	0	0	0	0	0	0	0	0
0	0	0	0	0	0	0	0	0	4.62528	-0.768286	-0.351215	0.740606	1.68464	0.653391	-0.869809	-1.66017	0.0748889	0.311171	0.0321978	-0.704852	-2.10921	-1.20465	0.772109	-0.354462	0.288509	0.392739	-0.747288	-0.156458	0	0	0	0	0	0	0	0	0	0	0
0	0	0	0	0	0	0	0	0	0	-4.08647	-0.472082	-2.29426	-0.106077	-0.126115	-1.73566	0.380261	0.939764	0.788639	1.79455	-0.991157	1.02842	-1.31427	-0.311864	-2.19922	-0.962108	-0.09526	2.3755	-0.441136	0	0	0	0	0	0	0	0	0	0	0
0	0	0	0	0	0	0	0	0	0	0	-5.60349	2.26312	-2.00435	-0.242178	0.322659	0.545605	0.445548	0.574678	0.187222	0.787667	-0.32512	-0.563134	-0.0854381	-0.273293	0.107438	0.0517165	-0.276514	1.25768	0	0	0	0	0	0	0	0	0	0	0
0	0	0	0	0	0	0	0	0	0	0	0	-4.72731	-1.53712	0.84068	-0.329683	0.368067	0.053611	-0.770346	0.816639	0.372381	0.830139	0.865072	1.16082	0.0765152	-0.575871	0.940073	0.251567	1.23605	0	0	0	0	0	0	0	0	0	0	0
0	0	0	0	0	0	0	0	0	0	0	0	0	3.40053	-0.0446188	1.54157	-0.583667	0.0965698	-0.313976	-1.25008	-0.19397	1.19415	-0.775167	-0.0995037	-0.463877	0.54252	-1.72657	-2.25034	0.298872	0	0	0	0	0	0	0	0	0	0	0
0	0	0	0	0	0	0	0	0	0	0	0	0	0	-3.51932	-0.642418	-0.333493	-0.0928401	0.759704	-0.736494	-2.22614	0.456915	0.463353	-0.59899	-1.66011	0.350427	1.2201	-0.640805	-0.820595	0	0	0	0	0	0	0	0	0	0	0
0	0	0	0	0	0	0	0	0	0	0	0	0	0	0	3.36607	-2.15698	0.271571	-0.170565	0.801427	-0.0062401	-0.319005	-0.529153	0.63878	-0.450385	-0.593258	2.00373	-1.06307	-0.198171	0	0	0	0	0	0	0	0	0	0	0
0	0	0	0	0	0	0	0	0	0	0	0	0	0	0	0	4.37156	-0.211082	0.677997	-0.840291	0.395259	-0.888537	-0.00708907	-1.0113	-0.739509	-0.911034	0.88687	-2.10358	0.309646	0	0	0	0	0	0	0	0	0	0	0
0	0	0	0	0	0	0	0	0	0	0	0	0	0	0	0	0	-4.04371	0.32246	0.434111	-0.981723	1.4914	0.7313	-1.20981	-0.0215459	1.49576	-1.01305	0.269203	0.883326	0	0	0	0	0	0	0	0	0	0	0
0	0	0	0	0	0	0	0	0	0	0	0	0	0	0	0	0	0	3.03372	-0.581588	-0.747789	2.19693	-0.105628	-0.228212	-1.83927	1.23224	-1.46083	-0.401615	-0.787008	0	0	0	0	0	0	0	0	0	0	0
0	0	0	0	0	0	0	0	0	0	0	0	0	0	0	0	0	0	0	3.24927	-0.662727	-0.0571123	0.332294	-0.337679	-1.86509	-1.82314	1.06864	-0.536555	0.508212	0	0	0	0	0	0	0	0	0	0	0
0	0	0	0	0	0	0	0	0	0	0	0	0	0	0	0	0	0	0	0	1.74275	1.72459	0.547873	0.441008	0.968542	0.574915	-0.920555	0.113731	-0.969802	0	0	0	0	0	0	0	0	0	0	0
0	0	0	0	0	0	0	0	0	0	0	0	0	0	0	0	0	0	0	0	0	-1.33663	-0.35705	0.100931	-0.318835	-0.211586	-1.008	-1.90559	-0.910459	0	0	0	0	0	0	0	0	0	0	0
0	0	0	0	0	0	0	0	0	0	0	0	0	0	0	0	0	0	0	0	0	0	-2.36727	0.122354	0.525996	-0.649879	-1.94213	-0.747767	1.06537	0	0	0	0	0	0	0	0	0	0	0
0	0	0	0	0	0	0	0	0	0	0	0	0	0	0	0	0	0	0	0	0	0	0	1.84335	0.546745	0.0510233	0.837817	-0.138041	-0.876121	0	0	0	0	0	0	0	0	0	0	0
0	0	0	0	0	0	0	0	0	0	0	0	0	0	0	0	0	0	0	0	0	0	0	0	1.35391	-0.320187	-0.079608	-0.259034	-1.43007	0	0	0	0	0	0	0	0	0	0	0
0	0	0	0	0	0	0	0	0	0	0	0	0	0	0	0	0	0	0	0	0	0	0	0	0	-1.37068	-0.111413	-1.67393	-1.93536	0	0	0	0	0	0	0	0	0	0	0
0	0	0	0	0	0	0	0	0	0	0	0	0	0	0	0	0	0	0	0	0	0	0	0	0	0	-0.976224	-0.0685137	0.781542	0	0	0	0	0	0	0	0	0	0	0
0	0	0	0	0	0	0	0	0	0	0	0	0	0	0	0	0	0	0	0	0	0	0	0	0	0	0	0.659563	-0.352677	0	0	0	0	0	0	0	0	0	0	0
0	0	0	0	0	0	0	0	0	0	0	0	0	0	0	0	0	0	0	0	0	0	0	0	0	0	0	0	-0.300365	0	0	0	0	0	0	0	0	0	0	0
0	0	0	0	0	0	0	0	0	0	0	0	0	0	0	0	0	0	0	0	0	0	0	0	0	0	0	0	0	0	0	0	0	0	0	0	0	0	0	0
-5.98309	1.52936	-0.93509	1.5171	-0.00100177	0.463756	1.39916	-1.49101	-1.58977	-0.0272094	-0.65244	0.174797	-0.52378	-0.145562	0.735527	1.70694	1.49583	1.15669	-1.97529	1.11107	1.5129	0.301534	0.199598	-0.106068	-1.69007	1.03356	-0.718044	0.74006	-0.622427	2.80637	0	0	0	0	0	0	0	0	0	0
0	5.79193	-0.678218	0.667682	0.231856	0.19922	-1.17932	0.682542	-1.03099	-0.551178	0.215632	-0.105512	0.309701	0.571154	0.372236	-0.184483	0.268001	0.435454	0.0480124	0.0305641	0.644041	0.31497	0.0457149	1.44749	0.126621	0.166061	1.36987	0.128764	-0.218921	-0.246	0	0	0	0	0	0	0	0	0	0
0	0	-5.421	0.565294	0.936908	-1.19103	0.413991	0.384196	0.124421	1.59539	0.158141	1.08942	-0.137217	-1.37374	0.252789	-0.633777	0.564995	-0.907008	0.575409	1.53952	-0.959875	-0.549578	-0.132629	0.382228	-0.590349	1.09433	-0.346271	-1.91737	-1.78502	0.229601	0	0	0	0	0	0	0	0	0	0
0	0	0	-3.93356	-0.208859	0.830709	0.730754	-0.194493	0.875118	-0.583828	1.62941	1.30043	1.10296	-0.630762	-0.572784	-1.07625	0.247371	-1.48602	-1.21477	0.541663	-1.52071	-1.04933	0.0732119	-0.237561	0.983491	2.77329	-1.53922	-1.32999	0.576355	1.68706	0	0	0	0	0	0	0	0	0	0
0	0	0	0	5.23621	0.855032	-0.0903162	1.33662	1.11825	-0.182705	0.514929	-0.231515	-2.05283	-0.41158	0.473499	0.0237208	1.13074	-0.85104	-0.946291	0.390341	-0.37327	-1.29865	-0.559467	-0.127824	0.0434436	0.304808	0.194131	-0.210896	-0.934702	0.568787	0	0	0	0	0	0	0	0	0	0
0	0	0	0	0	4.58289	0.535951	-0.950757	0.918137	-1.63812	0.745031	-1.87563	0.639012	-1.48905	1.66472	0.534974	-0.413064	-0.537083	-1.07894	-0.212599	-1.76329	1.72858	0.0648132	-0.811217	-0.636205	-0.149098	-2.16114	1.04579	-0.715966	0.419361	0	0	0	0	0	0	0	0	0	0
0	0	0	0	0	0	4.33022	0.267737	-2.11049	1.38809	-0.154213	1.40167	1.38194	-2.21014	1.38262	0.402579	0.177888	-0.0932462	0.631649	0.609787	-2.09609	0.507765	0.614264	0.43924	-0.723371	0.668474	-0.961702	2.62418	-0.732024	-0.855828	0	0	0	0	0	0	0	0	0	0
0	0	0	0	0	0	0	-4.08	-1.93624	-0.148538	-0.389116	0.555064	0.613517	0.126138	-1.25049	0.765381	-0.645559	0.178771	-0.82802	-0.310698	-1.9586	-0.418053	0.627776	0.625993	-0.58577	0.0847445	-0.120669	0.78553	-0.0221254	0.471872	0	0	0	0	0	0	0	0	0	0
0	0	0	0	0	0	0	0	-4.87605	-0.0203302	-1.67475	1.0208	-0.87657	-0.615104	0.975143	-0.391884	1.49791	0.150474	1.60941	0.226268	-0.283867	-0.145762	-0.616217	0.122725	0.54717	1.01782	0.771932	-0.731387	0.0955961	0.377923	0	0	0	0	0	0	0	0	0	0
0	0	0	0	0	0	0	0	0	4.29131	-0.886988	-1.1667	0.305289	-0.0901577	0.0672933	1.44771	1.32873	0.445897	0.754252	1.00241	-0.46815	-1.09782	0.338558	0.693819	0.81899	0.188629	0.528342	0.366159	0.184556	0.231967	0	0	0	0	0	0	0	0	0	0
0	0	0	0	0	0	0	0	0	0	-3.95385	0.298983	-1.38075	0.0506588	-0.905016	-1.33183	-0.334233	-0.976973	-0.809176	-0.0611761	-0.21039	2.31493	-1.4593	-1.01795	-0.165334	1.21354	0.132763	-0.133679	-0.184579	1.20262	0	0	0	0	0	0	0	0	0	0
0	0	0	0	0	0	0	0	0	0	0	-4.03088	-1.05153	2.31463	2.55569	1.83511	0.275783	0.253402	-1.32491	0.453572	-0.999068	0.353082	0.168861	-0.431388	-0.151463	-0.636882	0.925972	0.930542	1.42532	-2.85578	0	0	0	0	0	0	0	0	0	0
0	0	0	0	0	0	0	0	0	0	0	0	4.61808	0.338497	-0.863361	0.450482	-0.10401	0.0424241	0.192221	0.507843	0.561276	-3.12514	0.188391	0.411841	-0.315484	-0.689897	0.374265	-0.383877	2.03281	-1.05524	0	0	0	0	0	0	0	0	0	0
0	0	0	0	0	0	0	0	0	0	0	0	0	4.51557	0.964152	-0.682015	0.823222	1.08268	0.176619	-0.23142	0.638764	-0.35357	0.459307	0.310766	-3.05304	-1.07575	0.581728	2.06289	0.167921	-0.473536	0	0	0	0	0	0	0	0	0	0
0	0	0	0	0	0	0	0	0	0	0	0	0	0	3.85032	-0.574339	-0.549586	0.0347454	-0.917326	1.40713	-1.49581	0.0576502	1.96041	-0.288852	0.023866	-1.00011	-0.214541	1.03975	-1.31634	-0.266126	0	0	0	0	0	0	0	0	0	0
0	0	0	0	0	0	0	0	0	0	0	0	0	0	0	-3.95713	-0.220369	-0.0386568	-2.07648	0.144574	2.22785	0.434314	-0.351206	-0.0696504	0.0890724	1.9052	0.113303	-1.70091	-1.09667	-1.74316	0	0	0	0	0	0	0	0	0	0
0	0	0	0	0	0	0	0	0	0	0	0	0	0	0	0	3.74173	0.232896	0.546355	-0.155777	-1.61094	-1.61743	-0.505726	-0.0159315	0.878457	-0.0737462	0.6983	1.82572	-0.861548	-1.22285	0	0	0	0	0	0	0	0	0	0
0	0	0	0	0	0	0	0	0	0	0	0	0	0	0	0	0	-2.25777	0.938561	-0.146167	-0.301271	-0.193272	0.122735	0.365051	2.33217	0.44526	0.91099	0.592463	0.88185	-1.99	0	0	0	0	0	0	0	0	0	0
0	0	0	0	0	0	0	0	0	0	0	0	0	0	0	0	0	0	-3.29008	-0.242514	-1.509	-0.0662716	0.723168	0.867126	0.584584	3.02897	0.879738	1.36531	-2.21867	-1.09234	0	0	0	0	0	0	0	0	0	0
0	0	0	0	0	0	0	0	0	0	0	0	0	0	0	0	0	0	0	-3.51285	-0.495756	-1.49954	-0.179544	1.63264	-0.167454	-0.816166	1.16	-1.04749	-0.0329243	0.167704	0	0	0	0	0	0	0	0	0	0
0	0	0	0	0	0	0	0	0	0	0	0	0	0	0	0	0	0	0	0	-3.45035	-0.19448	-0.476174	-0.214247	-0.887943	0.00431655	1.23989	-0.693715	0.494716	-2.31319	0	0	0	0	0	0	0	0	0	0
0	0	0	0	0	0	0	0	0	0	0	0	0	0	0	0	0	0	0	0	0	-3.32401	0.898401	-0.603812	0.547438	0.317703	0.517318	-1.40221	-0.00391242	-0.618706	0	0	0	0	0	0	0	0	0	0
0	0	0	0	0	0	0	0	0	0	0	0	0	0	0	0	0	0	0	0	0	0	3.29638	0.29568	-0.49579	-0.993664	0.18763	1.04377	1.45017	0.369149	0	0	0	0	0	0	0	0	0	0
0	0	0	0	0	0	0	0	0	0	0	0	0	0	0	0	0	0	0	0	0	0	0	-2.89168	0.66579	0.657488	0.391479	-0.702044	1.43398	-0.80577	0	0	0	0	0	0	0	0	0	0
0	0	0	0	0	0	0	0	0	0	0	0	0	0	0	0	0	0	0	0	0	0	0	0	2.51976	-0.293528	-0.188573	1.06558	0.602208	-0.197524	0	0	0	0	0	0	0	0	0	0
0	0	0	0	0	0	0	0	0	0	0	0	0	0	0	0	0	0	0	0	0	0	0	0	0	-1.91415	0.0823183	-1.37871	-0.278232	-1.76487	0	0	0	0	0	0	0	0	0	0
0	0	0	0	0	0	0	0	0	0	0	0	0	0	0	0	0	0	0	0	0	0	0	0	0	0	-2.88903	-1.59468	0.451143	0.24053	0	0	0	0	0	0	0	0	0	0
0	0	0	0	0	0	0	0	0	0	0	0	0	0	0	0	0	0	0	0	0	0	0	0	0	0	0	1.97015	0.240858	-0.420376	0	0	0	0	0	0	0	0	0	0
0	0	0	0	0	0	0	0	0	0	0	0	0	0	0	0	0	0	0	0	0	0	0	0	0	0	0	0	0.682636	-0.606871	0	0	0	0	0	0	0	0	0	0
0	0	0	0	0	0	0	0	0	0	0	0	0	0	0	0	0	0	0	0	0	0	0	0	0	0	0	0	0	0.404809	0	0	0	0	0	0	0	0	0	0
0	0	0	0	0	0	0	0	0	0	0	0	0	0	0	0	0	0	0	0	0	0	0	0	0	0	0	0	0	0	0	0	0	0	0	0	0	0	0	0
5.8655	-1.36153	-0.894021	1.48028	0.242043	0.413954	-0.0305339	0.853205	0.881451	0.742194	-0.460854	-0.195166	0.897758	-0.180552	0.495469	0.738536	-1.5948	1.78171	0.143469	-1.22686	0.677206	-0.91055	-1.685	-0.573622	-0.607451	0.709086	-0.707237	0.747098	-0.24281	0.196003	0.244495	0	0	0	0	0	0	0	0	0
0	5.32457	1.11161	1.11231	2.40533	0.0388961	0.118983	1.42114	-0.254703	-1.10746	-0.408252	-0.955429	-1.00673	0.125654	-0.0646209	0.650552	-1.27216	1.2652	-0.925196	2.24499	0.135623	-1.67839	-0.179837	-2.54545	-1.15044	1.52983	-0.286872	0.892788	0.10623	1.18104	-0.524664	0	0	0	0	0	0	0	0	0
0	0	4.83237	-0.116702	-0.273668	-0.471372	-0.770303	0.912821	-0.0534756	-2.25851	-1.42886	-1.17031	-1.02299	1.52834	-0.774002	-0.44371	-0.235211	-0.40356	-1.04997	0.542477	0.526365	0.784325	-0.862658	0.0612294	-0.468881	-0.560916	1.45567	1.77822	2.08915	-1.51805	0.439098	0	0	0	0	0	0	0	0	0
0	0	0	-4.17061	0.792801	0.740093	-0.477861	1.04755	0.842637	-0.196484	-0.567648	1.67144	0.0251123	-0.110365	-0.218919	-0.0931515	1.23033	0.735887	1.26364	0.28512	-1.35571	0.299965	0.287703	-0.174286	0.546534	-2.20198	-0.899437	0.474932	-0.352592	-2.68614	1.2537	0	0	0	0	0	0	0	0	0
0	0	0	0	-4.79444	0.402419	1.03642	1.9128	0.294174	-0.500697	1.53958	-1.06673	2.56328	2.18977	0.740492	0.455368	0.742853	0.0341469	1.0704	-0.728575	-0.976484	-0.175681	-0.335757	-0.939584	0.91877	-0.764872	-1.20764	1.14147	-1.15395	0.665711	0.0905393	0	0	0	0	0	0	0	0	0
0	0	0	0	0	3.63702	0.129714	0.375435	1.62468	-0.176821	0.43592	-0.349309	-0.234626	0.367465	-0.66734	-0.304277	-2.00041	0.539519	0.116609	1.40936	-0.521365	-0.294487	-0.425172	-0.26311	-0.318441	-0.35463	-1.88771	0.697894	-0.997182	-0.213709	-0.0398333	0	0	0	0	0	0	0	0	0
0	0	0	0	0	0	-4.3439	0.502954	-1.11163	1.16456	0.466084	0.49808	0.956457	0.951801	-0.335437	1.59244	0.256484	1.52969	1.19725	-0.839587	-1.00206	0.540213	1.67062	-0.381875	0.376555	-0.495185	1.37047	1.78335	0.865343	-1.16643	-1.74502	0	0	0	0	0	0	0	0	0
0	0	0	0	0	0	0	-4.1475	-0.899067	0.990491	2.35778	0.239266	1.18739	0.525715	1.02649	-1.58062	2.20009	0.0106731	0.461845	-0.138124	1.81069	0.900902	1.59817	-0.352302	-0.143845	-0.45153	1.14254	-0.0545183	0.892961	0.121628	2.06767	0	0	0	0	0	0	0	0	0
0	0	0	0	0	0	0	0	3.87475	-0.804498	0.149766	-0.0682699	-1.57422	2.25234	-2.57368	1.40343	2.02918	-0.609621	-0.878372	0.390092	-0.670197	-0.138036	-1.09444	1.80259	0.00391138	-0.520455	0.883166	-1.30033	-1.4906	-1.21574	-0.186461	0	0	0	0	0	0	0	0	0
0	0	0	0	0	0	0	0	0	5.316	-0.146267	0.687332	-0.891046	-0.464835	1.82269	1.33769	1.07079	0.0842281	0.646674	0.04902	0.361511	0.706964	0.673726	1.1069	2.50685	-1.82825	-0.170071	-1.06573	0.130413	0.178904	1.12708	0	0	0	0	0	0	0	0	0
0	0	0	0	0	0	0	0	0	0	3.325	0.162686	0.146302	1.82347	0.209117	0.256571	-0.0507358	-1.46289	-0.14382	1.4459	-1.79274	0.268809	1.28874	-0.743782	-1.05283	-1.30416	-0.3507	1.80937	0.618655	-0.0585381	0.555452	0	0	0	0	0	0	0	0	0
0	0	0	0	0	0	0	0	0	0	0	3.93699	-1.7942	0.138464	-0.773699	-0.542116	0.482098	0.149282	0.0518722	0.451276	0.380364	-0.865189	-0.201473	-0.125037	0.0051384	0.303307	-0.36186	-2.63605	0.509278	1.05073	-1.14546	0	0	0	0	0	0	0	0	0
0	0	0	0	0	0	0	0	0	0	0	0	-4.03819	0.368563	-1.52252	0.410015	1.3175	-3.16698	-1.02188	-0.0886054	-0.984115	-1.52937	1.81216	-0.598923	0.734488	-0.769976	1.1378	0.356941	1.99556	0.027662	-0.536354	0	0	0	0	0	0	0	0	0
0	0	0	0	0	0	0	0	0	0	0	0	0	3.67354	0.0136085	0.516273	0.509249	-0.798592	-2.39188	0.286139	1.67287	1.28225	0.442361	-0.50806	0.196553	-0.596216	-0.42229	0.111843	-0.0145771	-0.722587	1.3634	0	0	0	0	0	0	0	0	0
0	0	0	0	0	0	0	0	0	0	0	0	0	0	-4.06363	-0.085617	0.477594	-0.315524	-0.60679	-0.683183	-0.955148	-0.617044	-0.511701	0.65253	0.644559	-1.43305	1.00165	-0.515293	0.510301	-0.442762	-0.541362	0	0	0	0	0	0	0	0	0
0	0	0	0	0	0	0	0	0	0	0	0	0	0	0	3.66869	-0.614646	-0.412111	1.17087	-0.852865	0.168171	1.15303	-0.170459	0.778745	0.281284	-0.321039	0.633192	-0.592955	0.161458	-0.00112058	-0.298929	0	0	0	0	0	0	0	0	0
0	0	0	0	0	0	0	0	0	0	0	0	0	0	0	0	2.37336	0.531424	0.643228	-0.739397	-1.47137	-0.446336	-0.00157191	0.628343	-1.60992	-1.67009	0.453157	0.960266	-0.153051	0.00697867	-1.47408	0	0	0	0	0	0	0	0	0
0	0	0	0	0	0	0	0	0	0	0	0	0	0	0	0	0	-4.76158	0.595375	0.609877	0.0738512	1.46588	1.50015	-1.43476	-1.75476	0.295241	0.707062	1.83024	-1.1842	0.579236	0.445787	0	0	0	0	0	0	0	0	0
0	0	0	0	0	0	0	0	0	0	0	0	0	0	0	0	0	0	3.77625	-0.680779	0.605957	0.506336	-0.907844	-0.684018	1.47042	-0.255586	0.0267794	-0.434198	-0.13381	0.26418	-0.279453	0	0	0	0	0	0	0	0	0
0	0	0	0	0	0	0	0	0	0	0	0	0	0	0	0	0	0	0	4.04415	-0.785549	1.32983	1.5387	-0.710369	0.690789	0.625328	-0.507637	1.86742	0.493876	0.323979	1.33714	0	0	0	0	0	0	0	0	0
0	0	0	0	0	0	0	0	0	0	0	0	0	0	0	0	0	0	0	0	2.93051	-0.304671	0.268524	-0.320231	0.219171	-0.246875	0.190566	0.691482	-0.334064	-0.649526	0.624568	0	0	0	0	0	0	0	0	0
0	0	0	0	0	0	0	0	0	0	0	0	0	0	0	0	0	0	0	0	0	3.00825	-0.856738	-0.487252	0.757762	0.634555	0.425132	1.44263	-0.218986	1.39739	1.2564	0	0	0	0	0	0	0	0	0
0	0	0	0	0	0	0	0	0	0	0	0	0	0	0	0	0	0	0	0	0	0	3.4961	0.0326733	-0.641427	-0.96848	1.83014	-1.39307	-0.370732	-0.161379	-0.92955	0	0	0	0	0	0	0	0	0
0	0	0	0	0	0	0	0	0	0	0	0	0	0	0	0	0	0	0	0	0	0	0	2.0203	-0.902545	1.53654	-0.472012	1.18838	-0.120044	-0.558018	-1.13616	0	0	0	0	0	0	0	0	0
0	0	0	0	0	0	0	0	0	0	0	0	0	0	0	0	0	0	0	0	0	0	0	0	-2.04463	0.477281	0.9783	0.289592	2.13041	0.860874	-0.998525	0	0	0	0	0	0	0	0	0
0	0	0	0	0	0	0	0	0	0	0	0	0	0	0	0	0	0	0	0	0	0	0	0	0	-2.08476	-1.48243	-0.648721	-1.23617	0.789038	-0.525352	0	0	0	0	0	0	0	0	0
0	0	0	0	0	0	0	0	0	0	0	0	0	0	0	0	0	0	0	0	0	0	0	0	0	0	-2.79104	-0.997609	0.557326	-1.4183	0.00532771	0	0	0	0	0	0	0	0	0
0	0	0	0	0	0	0	0	0	0	0	0	0	0	0	0	0	0	0	0	0	0	0	0	0	0	0	-2.57761	0.0550456	-0.288556	-0.818814	0	0	0	0	0	0	0	0	0
0	0	0	0	0	0	0	0	0	0	0	0	0	0	0	0	0	0	0	0	0	0	0	0	0	0	0	0	0.617351	0.787148	0.175737	0	0	0	0	0	0	0	0	0
0	0	0	0	0	0	0	0	0	0	0	0	0	0	0	0	0	0	0	0	0	0	0	0	0	0	0	0	0	2.17418	1.09982	0	0	0	0	0	0	0	0	0
0	0	0	0	0	0	0	0	0	0	0	0	0	0	0	0	0	0	0	0	0	0	0	0	0	0	0	0	0	0	-2.02567	0	0	0	0	0	0	0	0	0
0	0	0	0	0	0	0	0	0	0	0	0	0	0	0	0	0	0	0	0	0	0	0	0	0	0	0	0	0	0	0	0	0	0	0	0	0	0	0	0
-5.10759	1.42527	0.241109	0.215721	-0.991826	-0.600394	1.21024	-0.528437	-0.711109	1.50504	-1.50444	-0.0779367	0.717149	-0.218162	0.617491	-1.00424	1.5488	-0.302837	-0.808249	-1.01116	-0.0763933	0.179335	0.384989	0.708648	0.495714	-1.81673	0.130842	1.7442	0.292902	-0.17288	-1.01411	1.1238	0	0	0	0	0	0	0	0
0	5.11422	-1.34702	-0.337718	0.735576	-1.27382	-0.336988	-0.482641	-0.444605	-1.42585	2.19092	0.322355	0.803028	0.137243	-0.335511	1.12749	0.895263	-2.01734	2.21157	-0.640762	-0.444567	-0.028111	1.26757	-0.854407	-0.597287	0.221439	-0.478836	0.960071	1.76471	-0.137631	1.47338	-1.08561	0	0	0	0	0	0	0	0
0	0	5.85758	1.46773	0.962613	-0.767946	0.43827	1.20625	0.984442	0.0012252	-0.367267	1.02515	-0.56606	1.29409	2.25229	0.914105	0.135476	0.376711	-1.04681	0.164448	0.717725	-1.42094	-1.38637	1.60881	-1.15072	-0.256181	-0.0907581	0.163897	-1.56507	0.153981	-0.418988	-1.62354	0	0	0	0	0	0	0	0
0	0	0	-4.7126	-0.0529437	-0.297413	0.599408	-0.529285	0.399205	0.221326	1.61362	-0.73482	0.513507	1.51906	1.05424	-0.270713	0.783643	-1.49464	-1.38937	-0.146504	-1.11756	-0.049462	0.947268	0.555451	-1.28408	0.393959	-0.0549096	-0.389822	0.540419	0.115071	0.529355	0.845389	0	0	0	0	0	0	0	0
0	0	0	0	5.40161	0.590854	1.944	0.267635	0.578143	-0.204151	0.721219	1.51074	-1.2539	0.0220303	0.338839	-0.27882	1.60792	0.622811	-0.794905	-0.578355	1.35009	0.423064	0.0941593	-0.500024	-0.0961413	0.118383	-0.716782	0.695396	0.647386	0.655672	0.317556	-0.0429476	0	0	0	0	0	0	0	0
0	0	0	0	0	4.15332	1.08302	0.200564	1.14942	-0.924692	-0.489855	0.0234973	-0.850839	0.0597394	2.06664	-1.77262	-0.146158	-1.45565	0.453563	-0.330484	1.32363	0.768898	0.171806	0.00258188	1.20374	-0.174228	-0.147967	0.393476	0.787751	-0.554103	-1.12272	-0.617396	0	0	0	0	0	0	0	0
0	0	0	0	0	0	-5.62118	-0.126851	0.407196	-0.226566	0.0376154	0.13155	-0.598349	-0.909286	0.39243	-1.94235	1.2555	-0.88799	-0.199872	-0.858287	0.385012	0.364449	2.07785	-0.356982	-0.896241	-0.654261	-0.0176855	0.99573	-0.0106352	1.49243	-0.416079	-0.104909	0	0	0	0	0	0	0	0
0	0	0	0	0	0	0	-4.48717	-1.33717	0.457154	-0.516783	0.966473	-1.86783	0.041746	1.61151	-0.858185	0.413377	-1.13446	-1.53652	-0.0204963	2.7857	-0.66392	-0.0611935	-0.606085	0.983269	0.856003	0.186178	1.33842	1.0473	1.40219	0.313014	-0.642657	0	0	0	0	0	0	0	0
0	0	0	0	0	0	0	0	-3.75597	-1.12672	1.60344	-0.87335	0.754947	0.13258	-0.196035	0.414047	0.413672	-0.0361419	0.614032	0.78687	-0.413792	0.0830381	0.0619018	-0.691275	0.871813	0.278369	-0.212926	1.08818	-0.389231	-0.521449	0.0477827	-0.876811	0	0	0	0	0	0	0	0
0	0	0	0	0	0	0	0	0	-4.02135	0.602384	-1.66972	-0.227763	0.699212	0.433662	0.257547	0.0278067	-1.36334	-0.546678	0.635463	0.013863	1.07579	0.560628	1.76529	0.358114	1.41061	-1.07671	0.305411	1.04828	-0.305666	1.71261	1.3196	0	0	0	0	0	0	0	0
0	0	0	0	0	0	0	0	0	0	-5.07941	-0.827271	0.576008	-0.781215	-0.349744	-1.49386	1.86891	1.58789	0.166377	-0.15018	-1.03293	-0.985081	0.233651	-0.404276	-1.13074	-0.108343	0.972936	0.567456	-0.0560247	1.33228	-0.489944	-0.596355	0	0	0	0	0	0	0	0
0	0	0	0	0	0	0	0	0	0	0	-3.38696	-0.660344	0.484549	-0.685151	-1.24487	-0.143291	1.28988	-1.97923	-0.497664	0.771775	0.987594	-0.0926342	2.27183	-0.114071	-1.64739	0.0161756	-1.22686	0.021042	-0.318278	-0.511838	0.215044	0	0	0	0	0	0	0	0
0	0	0	0	0	0	0	0	0	0	0	0	-4.01779	0.919189	-0.205014	-1.90701	-0.0933269	-0.441045	0.374846	-0.528426	-1.75245	-0.663124	0.739636	0.485372	0.04492	-0.241579	-1.46436	-1.24258	1.27383	0.50844	-0.675025	0.827847	0	0	0	0	0	0	0	0
0	0	0	0	0	0	0	0	0	0	0	0	0	-4.17745	-0.323516	-0.584498	0.0712788	-0.626537	0.220563	-0.669751	0.311019	-0.247226	0.0381474	-1.18842	1.53399	-0.242468	-0.426919	0.045068	1.50558	-0.610796	-0.833816	-0.281686	0	0	0	0	0	0	0	0
0	0	0	0	0	0	0	0	0	0	0	0	0	0	4.14941	0.396952	-0.955688	0.631998	1.5261	1.59147	-1.28394	0.369504	-1.13617	-0.26823	-1.20322	-0.450911	0.501285	1.16773	1.29318	1.58931	-2.52649	-1.13705	0	0	0	0	0	0	0	0
0	0	0	0	0	0	0	0	0	0	0	0	0	0	0	-4.59152	-0.797124	2.58578	0.899666	-0.756884	-1.3575	-0.481406	0.604951	1.4124	-2.02844	-0.546185	1.0672	-0.828851	1.08724	-0.360412	-0.0845295	-0.726703	0	0	0	0	0	0	0	0
0	0	0	0	0	0	0	0	0	0	0	0	0	0	0	0	-3.63375	-0.71972	2.08894	0.049102	-0.496952	0.00426017	-0.956951	1.6219	-0.484342	-0.945854	1.28211	-0.980773	0.564559	0.960403	-1.80424	0.040214	0	0	0	0	0	0	0	0
0	0	0	0	0	0	0	0	0	0	0	0	0	0	0	0	0	3.71665	1.51322	-1.09141	0.241278	1.2403	0.354714	-1.138	-1.53874	-1.37759	0.929634	0.50911	-0.11795	-0.77739	0.864065	-1.46366	0	0	0	0	0	0	0	0
0	0	0	0	0	0	0	0	0	0	0	0	0	0	0	0	0	0	3.58181	-0.352983	-0.938479	-2.3194	1.20163	0.990849	1.27741	-0.898968	0.168867	-0.0809985	-0.254879	0.225004	0.395705	0.0374593	0	0	0	0	0	0	0	0
0	0	0	0	0	0	0	0	0	0	0	0	0	0	0	0	0	0	0	-4.21254	-0.965372	-0.407888	-0.564089	-2.28957	0.342203	1.7596	-0.146802	1.13466	-0.111957	0.855548	0.512291	-0.541786	0	0	0	0	0	0	0	0
0	0	0	0	0	0	0	0	0	0	0	0	0	0	0	0	0	0	0	0	2.97646	0.0611786	-0.897513	-0.315015	0.126508	-2.1622	-1.19311	-1.19775	-0.597946	0.689281	-0.528528	0.0598024	0	0	0	0	0	0	0	0
0	0	0	0	0	0	0	0	0	0	0	0	0	0	0	0	0	0	0	0	0	-3.59569	-0.254122	-0.237454	-0.754221	1.31227	-0.995599	-0.295017	-0.196259	-0.166744	-0.821062	0.405473	0	0	0	0	0	0	0	0
0	0	0	0	0	0	0	0	0	0	0	0	0	0	0	0	0	0	0	0	0	0	-3.29288	0.192536	-0.6644	0.141261	0.395701	1.52606	-0.93813	-0.114383	-0.159395	-0.445686	0	0	0	0	0	0	0	0
0	0	0	0	0	0	0	0	0	0	0	0	0	0	0	0	0	0	0	0	0	0	0	4.90292	-0.219183	0.4371	-0.909497	0.184289	-1.05587	0.536626	-0.866849	1.18641	0	0	0	0	0	0	0	0
0	0	0	0	0	0	0	0	0	0	0	0	0	0	0	0	0	0	0	0	0	0	0	0	-3.29617	1.41257	-1.73787	-0.248603	-0.0152242	-2.21334	0.60319	-0.509457	0	0	0	0	0	0	0	0
0	0	0	0	0	0	0	0	0	0	0	0	0	0	0	0	0	0	0	0	0	0	0	0	0	1.9871	-2.04145	-0.166037	1.05501	0.453586	-2.20579	-1.08534	0	0	0	0	0	0	0	0
0	0	0	0	0	0	0	0	0	0	0	0	0	0	0	0	0	0	0	0	0	0	0	0	0	0	-3.40426	-0.257608	-0.293652	0.536785	-1.53863	-1.35857	0	0	0	0	0	0	0	0
0	0	0	0	0	0	0	0	0	0	0	0	0	0	0	0	0	0	0	0	0	0	0	0	0	0	0	2.66459	-2.46634	0.29054	0.49166	-0.444769	0	0	0	0	0	0	0	0
0	0	0	0	0	0	0	0	0	0	0	0	0	0	0	0	0	0	0	0	0	0	0	0	0	0	0	0	-1.14657	0.35794	1.60529	-0.323399	0	0	0	0	0	0	0	0
0	0	0	0	0	0	0	0	0	0	0	0	0	0	0	0	0	0	0	0	0	0	0	0	0	0	0	0	0	1.63641	-0.661981	0.374364	0	0	0	0	0	0	0	0
0	0	0	0	0	0	0	0	0	0	0	0	0	0	0	0	0	0	0	0	0	0	0	0	0	0	0	0	0	0	0.792843	-0.364699	0	0	0	0	0	0	0	0
0	0	0	0	0	0	0	0	0	0	0	0	0	0	0	0	0	0	0	0	0	0	0	0	0	0	0	0	0	0	0	-1.45436	0	0	0	0	0	0	0	0
0	0	0	0	0	0	0	0	0	0	0	0	0	0	0	0	0	0	0	0	0	0	0	0	0	0	0	0	0	0	0	0	0	0	0	0	0	0	0	0
6.32522	1.20749	0.7606	0.68981	-0.492411	0.643444	1.56679	-0.0557198	0.598026	-0.713009	-0.271757	-1.12464	1.65329	-2.2062	-1.18815	-0.369891	0.228382	1.44024	0.400056	-1.05778	-1.20224	-0.93796	1.05324	-1.73154	-0.0464669	-0.58215	0.200012	1.47903	-0.717394	-0.237347	-1.50739	0.751451	-1.62414	0	0	0	0	0	0	0
0	-4.33308	0.871364	0.248271	1.0941	-1.52609	-0.216676	-0.600371	2.12984	-0.361086	-0.0677263	-1.48203	2.16012	-0.28248	0.362052	-1.28679	-0.506794	1.44223	1.19111	0.713983	-0.322766	-1.26005	-0.670991	0.035908	-1.13537	-2.43281	-1.97658	0.380773	-0.433671	-0.696055	0.438751	0.817514	-0.0879964	0	0	0	0	0	0	0
0	0	5.3462	0.437126	-1.72975	1.68727	-0.631128	-0.890655	1.1139	-0.721192	-0.122175	-0.0734195	-1.72913	-2.24391	-0.672527	1.23609	1.19893	0.458008	0.832357	-0.522487	-1.38105	-0.560612	-1.83157	-1.53	0.0781635	0.530723	-0.98588	-0.192172	1.82125	-0.97445	2.08182	0.0853872	-0.31255	0	0	0	0	0	0	0
0	0	0	5.70335	-0.361485	1.13911	-1.64309	1.122	-0.491146	0.689837	-2.73828	0.202922	-1.19392	-0.365483	-1.30182	0.71803	0.536906	0.559853	0.157731	-1.33364	0.307413	0.149551	1.0718	-1.76243	-1.03986	-0.816239	0.525561	-0.770401	-1.435	0.305423	-0.619406	2.70092	0.847406	0	0	0	0	0	0	0
0	0	0	0	4.51378	0.434909	0.0860943	-1.9164	-1.81371	0.192454	1.67216	-0.476936	-1.19545	0.74102	2.26774	-0.913252	0.99345	-0.740933	-1.81586	-2.06354	0.137949	-0.669442	0.941405	1.50127	-0.233226	0.0591589	-0.979555	0.664261	-1.01596	-1.01934	1.81497	-0.72478	0.0182031	0	0	0	0	0	0	0
0	0	0	0	0	5.08277	0.321687	-0.000181938	1.05472	0.486448	-0.163681	0.126143	1.11247	0.0536766	2.19326	1.36912	0.172907	1.28075	-0.469245	-0.998358	0.158603	0.239042	-0.125428	1.01946	-1.13249	-0.627083	-0.751734	0.610367	0.525421	1.99976	-1.12399	-0.951047	-0.757655	0	0	0	0	0	0	0
0	0	0	0	0	0	-5.19861	-1.60492	0.0255498	-0.936154	0.444589	0.447462	0.900258	-0.0993686	1.55805	-0.471372	-0.261866	-0.543831	-1.24266	0.254577	-0.612403	-0.631539	0.228338	0.121888	0.367113	-1.19728	1.19827	-0.420785	0.538709	2.23012	0.718715	0.767865	0.283239	0	0	0	0	0	0	0
0	0	0	0	0	0	0	-5.02179	0.0881509	0.549175	0.263225	0.857329	-0.134313	0.193555	0.831034	0.742461	-0.742725	-1.4887	0.661268	2.11747	-1.25485	-0.0567536	2.69334	0.910821	0.117286	0.777782	2.35827	-1.11676	-0.0332828	-0.000610407	-0.346494	-0.791615	-0.079372	0	0	0	0	0	0	0
0	0	0	0	0	0	0	0	-4.89454	-1.85324	-0.496906	-1.14118	-0.722776	0.532273	-0.900334	-0.644484	-0.954252	-0.620993	-0.707068	-0.1463	-0.34593	-1.075	0.297605	-1.13287	1.69323	-0.98869	-0.161886	0.689904	1.03288	-0.824845	1.0738	1.42443	0.804134	0	0	0	0	0	0	0
0	0	0	0	0	0	0	0	0	4.09552	-0.234682	-1.0527	1.27028	0.135443	0.597709	-1.99315	-1.20805	0.557064	-0.0832201	0.181902	-1.49964	1.03026	0.78039	1.54788	-0.258634	-0.439514	-0.160199	0.727927	-0.714463	0.970651	-1.55372	1.0292	0.385379	0	0	0	0	0	0	0
0	0	0	0	0	0	0	0	0	0	-3.54721	-0.86235	-0.182648	-0.853197	0.112695	-3.06792	0.58048	-0.49701	0.303342	-1.52452	1.11097	2.04848	0.89324	-0.157301	-0.0261636	-0.00343829	0.809766	1.52358	-2.67781	1.04622	0.33516	0.869917	-1.41649	0	0	0	0	0	0	0
0	0	0	0	0	0	0	0	0	0	0	-4.75021	1.58215	-1.63666	-0.139362	0.710595	-1.982	-0.18799	-1.49129	0.358177	-0.180211	-0.0876025	0.62279	0.150887	-2.27721	-1.08762	-0.479505	1.209	-1.67103	-2.36215	-0.723139	0.616702	-1.2484	0	0	0	0	0	0	0
0	0	0	0	0	0	0	0	0	0	0	0	4.33766	0.41116	-0.677424	-0.163686	0.823802	-0.898903	-0.555067	0.00439185	0.200111	0.817608	0.313644	-1.10174	-0.67641	-0.578705	-1.1168	0.93827	-0.517087	1.00179	1.04884	-2.32067	-0.450839	0	0	0	0	0	0	0
0	0	0	0	0	0	0	0	0	0	0	0	0	5.32874	0.349888	1.66028	-1.42749	0.189369	-0.0816862	-0.66081	-0.426212	-0.289474	-0.475519	-1.84423	1.20327	0.503569	-0.771038	-0.582894	-0.00581131	-2.32669	0.328386	1.52928	-0.57708	0	0	0	0	0	0	0
0	0	0	0	0	0	0	0	0	0	0	0	0	0	4.5636	-1.51623	0.832658	0.00312525	0.616241	-0.995302	-0.525892	-1.01082	2.25958	0.0599243	0.0120428	1.1161	0.517646	-0.592022	1.37813	-1.19338	-0.863058	-2.23468	0.819743	0	0	0	0	0	0	0
0	0	0	0	0	0	0	0	0	0	0	0	0	0	0	4.30681	0.840105	-0.683416	-0.668785	2.42503	0.659976	-0.460141	0.650886	-2.18982	0.593505	0.739483	-1.12968	1.13921	-0.0585242	2.35726	0.464623	0.33936	-1.58386	0	0	0	0	0	0	0
0	0	0	0	0	0	0	0	0	0	0	0	0	0	0	0	-3.50621	-1.04821	0.931176	-1.17793	0.0994184	0.372403	-0.812187	1.10981	-0.41976	-1.10946	0.233273	-0.390538	-0.636349	-0.885307	0.976673	-0.141619	0.549408	0	0	0	0	0	0	0
0	0	0	0	0	0	0	0	0	0	0	0	0	0	0	0	0	4.81459	-0.337988	0.568757	-1.7715	-0.0526463	-0.919012	-0.364116	0.558049	-2.47065	-1.11506	-0.718182	0.628575	-0.21707	0.44061	-0.837003	0.131123	0	0	0	0	0	0	0
0	0	0	0	0	0	0	0	0	0	0	0	0	0	0	0	0	0	3.68051	-0.479507	-1.16657	-0.927797	-1.73505	-0.597428	-1.59884	-0.841324	-0.257201	-0.141424	1.38863	-0.590698	-1.27959	-0.14721	0.675124	0	0	0	0	0	0	0
0	0	0	0	0	0	0	0	0	0	0	0	0	0	0	0	0	0	0	4.11136	0.961237	1.43536	-1.61253	-1.41195	0.240842	2.11958	1.77981	1.82135	0.823787	1.04503	-0.618986	-0.578808	-1.32382	0	0	0	0	0	0	0
0	0	0	0	0	0	0	0	0	0	0	0	0	0	0	0	0	0	0	0	-3.99282	1.79808	-1.19407	0.694465	0.558564	1.51704	-0.613189	0.835006	0.175167	0.0241046	-0.511985	-0.971256	0.46453	0	0	0	0	0	0	0
0	0	0	0	0	0	0	0	0	0	0	0	0	0	0	0	0	0	0	0	0	-2.57884	0.0349071	-0.761348	0.0871353	-0.00263486	0.599087	0.92012	0.0757056	-1.46176	1.14687	-0.131485	0.309214	0	0	0	0	0	0	0
0	0	0	0	0	0	0	0	0	0	0	0	0	0	0	0	0	0	0	0	0	0	2.72506	1.22929	-0.480755	-0.933117	-0.716508	-0.542605	0.254838	0.192832	0.0363177	-1.07524	0.211362	0	0	0	0	0	0	0
0	0	0	0	0	0	0	0	0	0	0	0	0	0	0	0	0	0	0	0	0	0	0	2.84014	0.553405	0.231917	0.420451	1.14499	0.537246	-1.24043	0.166171	-0.888576	-0.476203	0	0	0	0	0	0	0
0	0	0	0	0	0	0	0	0	0	0	0	0	0	0	0	0	0	0	0	0	0	0	0	-3.24035	-0.117367	-0.686556	0.618937	-0.1618	-0.00694295	1.86025	0.30434	-0.657334	0	0	0	0	0	0	0
0	0	0	0	0	0	0	0	0	0	0	0	0	0	0	0	0	0	0	0	0	0	0	0	0	-3.10713	-1.47153	1.42846	0.00268595	1.50541	-2.36865	0.708673	-0.756618	0	0	0	0	0	0	0
0	0	0	0	0	0	0	0	0	0	0	0	0	0	0	0	0	0	0	0	0	0	0	0	0	0	1.67522	-0.495315	-2.04837	0.241906	0.317694	-0.133475	0.801895	0	0	0	0	0	0	0
0	0	0	0	0	0	0	0	0	0	0	0	0	0	0	0	0	0	0	0	0	0	0	0	0	0	0	2.895	-0.803027	0.60604	0.458891	0.852854	-0.347705	0	0	0	0	0	0	0
0	0	0	0	0	0	0	0	0	0	0	0	0	0	0	0	0	0	0	0	0	0	0	0	0	0	0	0	-1.7904	-0.560428	-1.50604	-0.834022	-0.143299	0	0	0	0	0	0	0
0	0	0	0	0	0	0	0	0	0	0	0	0	0	0	0	0	0	0	0	0	0	0	0	0	0	0	0	0	2.42392	0.174083	-3.1694	-0.985825	0	0	0	0	0	0	0
0	0	0	0	0	0	0	0	0	0	0	0	0	0	0	0	0	0	0	0	0	0	0	0	0	0	0	0	0	0	1.41801	-0.158684	0.847686	0	0	0	0	0	0	0
0	0	0	0	0	0	0	0	0	0	0	0	0	0	0	0	0	0	0	0	0	0	0	0	0	0	0	0	0	0	0	-1.34609	-0.167321	0	0	0	0	0	0	0
0	0	0	0	0	0	0	0	0	0	0	0	0	0	0	0	0	0	0	0	0	0	0	0	0	0	0	0	0	0	0	0	-0.928919	0	0	0	0	0	0	0
0	0	0	0	0	0	0	0	0	0	0	0	0	0	0	0	0	0	0	0	0	0	0	0	0	0	0	0	0	0	0	0	0	0	0	0	0	0	0	0
6.26551	1.86889	-0.0588886	-0.253529	-0.452946	-1.25443	-0.252632	-0.235379	0.922998	0.196959	0.483942	-0.205156	-0.791769	-1.05138	-0.267895	-0.699377	1.26723	-0.0903529	-2.79018	-0.123798	-1.26242	-0.131291	-0.240239	1.73497	-0.618516	0.124171	0.0309216	-1.82188	1.65021	-1.631	1.32385	0.886834	-1.49335	-0.7225	0	0	0	0	0	0
0	7.08768	-0.117879	-0.593091	-1.46875	1.73451	-0.499257	-0.213943	0.76453	0.675968	-1.27949	-0.148999	-0.161126	-0.0863745	-1.10134	1.17513	-0.270504	0.817926	0.0898711	-0.148418	0.158309	-0.149508	0.248005	-0.716567	-0.772422	1.14199	0.113211	0.564277	-0.730796	-0.917649	0.0105176	-1.63759	0.192102	0.178903	0	0	0	0	0	0
0	0	-4.93463	0.727913	1.07239	-0.0921243	1.51896	0.758633	0.822649	0.852477	-0.110845	-1.56885	1.47181	-0.786475	-0.691459	0.402571	-0.501833	1.07619	-0.993779	0.24307	-1.29824	-0.932259	-0.994453	0.0630137	-0.0724918	1.21295	0.789551	-0.825303	-1.47615	1.88253	0.0984645	0.00570862	-0.0389931	0.30478	0	0	0	0	0	0
0	0	0	5.93172	1.67326	0.978889	1.07537	0.770702	0.209616	-1.4971	-1.14201	-0.358826	-0.69027	-0.550462	-1.91492	1.19834	0.883697	0.269355	-0.32921	1.31871	1.54882	0.948188	-0.505629	0.158732	-0.15102	1.19937	-2.3158	-0.741698	-0.264924	0.599309	2.46829	-3.37212	-0.733683	-1.09148	0	0	0	0	0	0
0	0	0	0	-5.99612	0.0176503	1.76393	-0.203398	1.71341	-1.77921	1.26242	-0.731381	0.320222	-0.533419	-0.270578	-0.361041	0.705767	-0.211225	-1.54743	2.43554	2.15915	1.41323	-0.502219	0.657895	0.481194	0.342551	-0.213696	0.245232	0.311893	0.967637	0.246591	0.421167	-0.43171	0.430122	0	0	0	0	0	0
0	0	0	0	0	-5.32482	-0.542318	0.595021	-0.462702	0.257308	1.23706	-1.58064	0.431412	0.582864	2.34382	-1.64535	0.326491	0.0298511	0.13065	1.16654	-0.964329	2.11374	0.890787	-0.503177	-0.652078	-0.503055	-0.833818	-0.287147	-1.08677	-0.0393425	-1.16694	0.180659	0.661925	-1.59568	0	0	0	0	0	0
0	0	0	0	0	0	6.09731	0.814464	0.443695	0.605118	-0.363598	0.330571	-0.110897	1.13953	-1.05337	0.622945	0.686919	0.13087	0.0369188	-0.0733978	-0.414759	1.06107	0.551904	0.421917	-0.137212	-0.0975429	0.53871	0.294315	-0.0789878	-1.22517	-0.924495	0.822295	-0.899652	-0.0684261	0	0	0	0	0	0
0	0	0	0	0	0	0	-5.90309	1.36929	-0.902176	0.454867	1.15265	-0.566269	0.222172	-0.583863	0.314318	-0.76033	-0.220538	-0.736424	-1.2778	-1.97018	-0.0777886	0.0684981	-1.22329	0.76737	-1.03306	0.412294	-0.102222	-0.0646014	0.597148	0.409206	1.93104	0.139073	0.265624	0	0	0	0	0	0
0	0	0	0	0	0	0	0	-4.31949	-0.308897	0.575975	1.05234	-0.46878	-0.122351	0.582129	1.08988	2.3897	-0.109303	1.40805	-0.555181	1.37727	-0.676323	1.66453	-0.0518686	-0.383045	-0.129769	-0.499016	-0.084123	-1.84251	1.58295	1.5678	1.50491	-1.4113	-0.305662	0	0	0	0	0	0
0	0	0	0	0	0	0	0	0	5.63686	-0.905814	1.51808	-2.69078	0.680489	0.0134898	0.101411	-0.28528	-0.87394	0.44062	-1.27363	1.85017	-0.928711	-0.775653	0.503057	0.706835	-0.0997092	-1.42187	1.25993	0.242138	-1.01678	1.88525	-1.55948	0.493601	-1.19389	0	0	0	0	0	0
0	0	0	0	0	0	0	0	0	0	3.72228	0.203229	-1.05687	0.305986	0.41732	0.458402	0.65183	1.21871	0.391579	0.339267	1.03734	0.535552	-0.104695	0.32155	-0.587205	1.42752	0.366418	0.368398	1.24794	-0.639334	-0.22432	2.17129	0.593963	-0.632416	0	0	0	0	0	0
0	0	0	0	0	0	0	0	0	0	0	-4.44526	-0.520091	1.04501	0.308075	0.251981	0.612229	-0.647121	-0.535018	-1.44519	-1.19466	1.77941	-0.194535	0.159702	-0.308755	-0.330947	0.211745	0.78906	-0.740094	0.252104	-1.13513	1.56806	-2.242	-0.348388	0	0	0	0	0	0
0	0	0	0	0	0	0	0	0	0	0	0	-3.68986	1.28459	0.486504	0.0191169	0.428284	-1.27175	-0.434888	-1.42423	-0.0994139	-0.369746	0.233396	-0.797002	-1.22935	1.87192	1.69014	-0.419429	-0.216948	-0.989122	0.0892993	-0.0158619	0.811122	-0.678194	0	0	0	0	0	0
0	0	0	0	0	0	0	0	0	0	0	0	0	3.76161	-0.689652	-0.756082	-0.656849	0.894639	-0.199743	-0.67044	0.601686	0.658179	-0.222609	0.630083	0.786597	-0.926347	0.348136	1.62003	0.956388	1.05081	1.39082	-1.64942	-1.68282	0.89594	0	0	0	0	0	0
0	0	0	0	0	0	0	0	0	0	0	0	0	0	5.59093	-0.758875	-0.496953	0.610463	0.53567	1.3118	0.287225	-1.22864	-1.29096	0.0173203	0.181041	0.694164	-1.22494	-2.4032	0.375612	2.14088	0.168752	1.76467	-0.925032	-0.627522	0	0	0	0	0	0
0	0	0	0	0	0	0	0	0	0	0	0	0	0	0	-3.70442	0.568631	-0.672763	0.292848	0.114342	-0.979454	-0.853431	-0.0298814	1.33649	1.18428	0.857851	0.187792	0.954	-1.27468	0.20508	-1.32198	-0.758384	0.848726	-2.32321	0	0	0	0	0	0
0	0	0	0	0	0	0	0	0	0	0	0	0	0	0	0	-4.29129	-0.749682	-0.218969	0.362234	1.96446	0.313489	0.0545316	-1.18503	-1.5947	0.549363	-0.888101	-1.02585	0.731252	-0.298133	1.19329	0.812628	-0.912448	-0.717975	0	0	0	0	0	0
0	0	0	0	0	0	0	0	0	0	0	0	0	0	0	0	0	-3.29246	-0.226839	-0.569008	-0.0821971	-1.23299	1.26569	0.959962	-1.75265	0.662319	0.446715	1.26372	-1.54343	-1.46439	0.874649	0.905294	-0.280742	0.0198098	0	0	0	0	0	0
0	0	0	0	0	0	0	0	0	0	0	0	0	0	0	0	0	0	-3.10179	-0.458288	-1.4025	1.11835	0.49031	-0.230666	0.374156	-1.02226	-2.11446	-0.231019	0.342223	-0.598212	0.8567	-0.822732	-0.171583	0.229023	0	0	0	0	0	0
0	0	0	0	0	0	0	0	0	0	0	0	0	0	0	0	0	0	0	3.85727	1.17022	1.08779	2.03874	-2.72294	-0.576813	1.76938	1.11913	0.774208	0.184828	0.0831236	-0.600967	0.551723	-0.219791	0.486713	0	0	0	0	0	0
0	0	0	0	0	0	0	0	0	0	0	0	0	0	0	0	0	0	0	0	-4.97139	0.604431	2.06307	0.251943	1.12907	-1.25484	-0.661353	0.266216	0.843793	0.0342984	1.42808	0.902558	0.0146882	0.655733	0	0	0	0	0	0
0	0	0	0	0	0	0	0	0	0	0	0	0	0	0	0	0	0	0	0	0	-2.69609	-0.400969	0.44236	0.77902	-1.03189	-0.974583	-0.875146	0.601482	-1.10346	0.438862	0.647001	0.33105	1.85546	0	0	0	0	0	0
0	0	0	0	0	0	0	0	0	0	0	0	0	0	0	0	0	0	0	0	0	0	-4.14246	0.633003	-0.69776	0.824569	0.205699	-0.866742	-0.285698	-0.852121	-1.10375	1.44138	0.764683	0.499226	0	0	0	0	0	0
0	0	0	0	0	0	0	0	0	0	0	0	0	0	0	0	0	0	0	0	0	0	0	-2.77026	-0.12445	0.665875	-1.17622	-1.79701	-0.586838	1.00689	0.729255	-1.39401	0.796492	0.946324	0	0	0	0	0	0
0	0	0	0	0	0	0	0	0	0	0	0	0	0	0	0	0	0	0	0	0	0	0	0	4.03398	1.45311	1.50175	-0.262069	-1.15881	-0.324053	-0.161473	-0.523581	-1.6851	-2.53486	0	0	0	0	0	0
0	0	0	0	0	0	0	0	0	0	0	0	0	0	0	0	0	0	0	0	0	0	0	0	0	-1.48252	-1.04534	-2.07574	0.903949	1.54986	-0.541652	-0.687839	0.987649	0.0290438	0	0	0	0	0	0
0	0	0	0	0	0	0	0	0	0	0	0	0	0	0	0	0	0	0	0	0	0	0	0	0	0	-2.36876	0.266802	1.04693	-1.40723	2.04548	2.41208	0.84056	0.364423	0	0	0	0	0	0
0	0	0	0	0	0	0	0	0	0	0	0	0	0	0	0	0	0	0	0	0	0	0	0	0	0	0	2.30123	0.798854	2.10095	0.494967	-1.58475	0.457176	1.66894	0	0	0	0	0	0
0	0	0	0	0	0	0	0	0	0	0	0	0	0	0	0	0	0	0	0	0	0	0	0	0	0	0	0	2.57806	-0.862359	1.42691	0.463324	0.437458	1.27595	0	0	0	0	0	0
0	0	0	0	0	0	0	0	0	0	0	0	0	0	0	0	0	0	0	0	0	0	0	0	0	0	0	0	0	-2.82998	-0.517934	0.766638	-0.755869	0.185521	0	0	0	0	0	0
0	0	0	0	0	0	0	0	0	0	0	0	0	0	0	0	0	0	0	0	0	0	0	0	0	0	0	0	0	0	3.0784	-0.0476056	-0.464509	2.12362	0	0	0	0	0	0
0	0	0	0	0	0	0	0	0	0	0	0	0	0	0	0	0	0	0	0	0	0	0	0	0	0	0	0	0	0	0	0.572351	0.161183	0.55847	0	0	0	0	0	0
0	0	0	0	0	0	0	0	0	0	0	0	0	0	0	0	0	0	0	0	0	0	0	0	0	0	0	0	0	0	0	0	-0.59169	0.879087	0	0	0	0	0	0
0	0	0	0	0	0	0	0	0	0	0	0	0	0	0	0	0	0	0	0	0	0	0	0	0	0	0	0	0	0	0	0	0	-0.292083	0	0	0	0	0	0
0	0	0	0	0	0	0	0	0	0	0	0	0	0	0	0	0	0	0	0	0	0	0	0	0	0	0	0	0	0	0	0	0	0	0	0	0	0	0	0
-6.08666	1.34066	-0.618628	1.0694	1.61176	0.720467	-1.24824	-2.15887	0.68532	-0.193639	1.33878	0.269507	0.253779	0.190451	-0.759496	-1.71785	0.173973	-1.02619	-1.16332	0.0468014	-0.441857	1.60029	-1.77277	-0.26506	-0.252311	1.46832	-0.635721	-1.12153	-0.350432	1.81051	1.14606	-0.02084	0.122062	0.211219	-0.693886	0	0	0	0	0
0	5.77678	0.852917	0.810381	1.11035	-0.394342	-0.662746	-0.36633	1.29546	-1.69303	1.20522	0.852333	-0.079475	-0.357458	0.61126	-0.859329	-1.28056	-1.0783	-0.757858	0.569243	-0.507382	-0.450587	-1.37168	0.436735	-1.33637	0.411534	-0.340518	-2.31195	-2.09727	0.258211	-1.43384	-1.38281	2.55656	1.59627	0.775507	0	0	0	0	0
0	0	4.87144	-0.742076	0.749471	-0.802106	-1.09654	-0.809278	-0.175669	1.54688	0.797264	0.305717	0.990953	0.124212	-0.382122	1.93274	1.59333	-0.643115	-0.785795	-1.90816	-0.84392	0.647805	-0.885163	0.851217	-1.42633	-0.548642	0.050584	0.995366	-3.25958	1.95741	0.266564	1.49984	-1.21121	-0.722081	-0.886031	0	0	0	0	0
0	0	0	5.76079	0.0212754	1.12598	1.64214	-0.178377	-0.158873	0.337118	0.489139	-0.430825	-0.632547	0.370893	1.03251	-1.4962	1.69296	0.999295	-0.305447	-1.69912	1.12783	0.428592	-0.459898	0.550398	2.49314	0.656433	-0.893347	-0.843531	2.06068	0.308019	0.234616	-1.54236	-1.05994	1.84864	0.136663	0	0	0	0	0
0	0	0	0	-5.46226	0.104337	-0.650242	-0.432172	-0.652313	-0.503546	1.07479	1.27123	0.44782	-1.0079	0.698421	0.0418641	-1.49096	0.0483115	-1.6611	-2.34482	-1.00358	-0.272637	0.560377	-0.359624	-0.942339	1.24152	-0.266521	0.80493	-1.66765	-0.376806	-0.749533	-0.589536	0.0857628	-0.266867	-0.382308	0	0	0	0	0
0	0	0	0	0	-6.61123	0.659494	-0.637042	0.831159	-0.417	-1.54536	0.729269	-0.889033	1.62631	0.17817	-0.124983	0.627104	-0.866934	2.50859	-1.9543	-1.41024	-0.125918	1.42822	2.53927	-1.2056	-0.182705	-0.13027	-1.50701	-0.210162	0.400736	-0.593466	1.48009	-0.218231	0.630595	-0.618102	0	0	0	0	0
0	0	0	0	0	0	5.60524	0.971401	0.147128	2.12462	-1.36506	0.653329	0.911496	0.664249	-1.23098	-0.992652	0.0641067	0.09901	0.169817	-0.0497767	-0.262392	-1.22283	0.400503	-1.07664	-1.54087	-2.35224	1.41915	-0.521352	-0.44192	-0.1021	1.61297	1.16287	-0.773731	1.03403	-0.870451	0	0	0	0	0
0	0	0	0	0	0	0	4.77508	-0.658428	-0.0668102	-0.0154813	-1.44436	1.81268	-0.21591	-0.651682	1.70265	0.59891	-0.0932591	-0.018265	0.00378715	0.482072	-3.48253	1.37029	0.561853	-1.60767	-1.77661	-0.228091	-0.169054	-0.109596	-0.0185431	-0.326067	0.548765	0.0962131	-0.0738769	-0.928573	0	0	0	0	0
0	0	0	0	0	0	0	0	4.50251	0.448476	-0.0926506	2.08255	1.26497	-0.986296	-0.12062	-0.528582	-1.09285	-0.0780672	-0.412189	0.118388	0.957777	1.27332	-1.51624	1.5979	0.485571	2.49781	-0.0633438	0.772717	0.583801	-1.13186	0.957461	-1.08483	0.615991	-0.868011	-0.400932	0	0	0	0	0
0	0	0	0	0	0	0	0	0	4.79146	0.370952	2.48935	0.930531	-0.299776	0.0468139	-0.466171	0.146973	2.37382	0.19198	-0.622634	1.82449	-0.213324	0.358731	-0.157719	-0.0774243	1.50172	0.846716	0.303613	1.99912	0.210416	0.246212	0.503989	-0.334115	0.512934	0.652888	0	0	0	0	0
0	0	0	0	0	0	0	0	0	0	-5.20809	0.832778	0.774148	-0.740237	-0.607039	0.161304	0.585887	1.04193	0.378399	1.41058	-0.514509	-0.906623	-0.186022	0.489018	-1.2058	0.805823	0.283787	0.146524	0.945999	-0.280367	-0.902978	0.639409	1.91589	0.198817	-0.088745	0	0	0	0	0
0	0	0	0	0	0	0	0	0	0	0	4.38422	-0.605065	0.494937	-0.800769	-0.502973	-0.783898	-1.3283	0.389833	-0.304671	2.21227	-0.958153	-0.0511192	1.22105	0.839363	0.217258	-1.00459	1.47392	-0.65701	-1.381	0.904366	-0.0396489	-0.154649	0.287062	-0.126761	0	0	0	0	0
0	0	0	0	0	0	0	0	0	0	0	0	5.14427	-0.877356	-0.421444	1.31588	0.508208	0.68907	-1.80969	-0.0963032	1.17912	1.39025	1.86476	-0.114515	-0.199737	-2.57892	-0.217045	-0.864972	0.565401	0.0672755	-0.891015	1.41493	0.644064	-1.6269	0.0673255	0	0	0	0	0
0	0	0	0	0	0	0	0	0	0	0	0	0	5.8385	-0.441629	0.417174	-1.74029	0.0302181	-1.47482	0.161994	-1.34898	-0.043443	0.810924	-1.66023	-0.206842	0.412144	-1.466	0.195043	-0.834797	0.448109	0.69875	0.657912	0.967186	-0.00163621	-0.808517	0	0	0	0	0
0	0	0	0	0	0	0	0	0	0	0	0	0	0	-4.47402	-0.832718	0.337027	1.39208	-0.662058	2.15198	-0.170954	-0.648107	-0.0721583	-2.00479	-0.0673266	-1.30977	1.06585	0.982959	-0.287726	0.850917	-0.116924	-1.55488	0.787109	0.369396	-0.784013	0	0	0	0	0
0	0	0	0	0	0	0	0	0	0	0	0	0	0	0	-4.34776	-0.384386	0.974888	0.764787	-1.32367	-0.0466613	-0.53904	0.664062	-0.355681	0.28418	-1.24128	1.27572	1.9129	-0.357993	-0.430991	-0.731358	-1.83416	0.371567	0.540287	0.542045	0	0	0	0	0
0	0	0	0	0	0	0	0	0	0	0	0	0	0	0	0	3.99261	-0.844894	-1.02297	-1.79166	1.16613	0.684052	1.42592	-1.29557	-0.604213	-0.350171	1.93557	0.115688	-2.08392	0.132331	0.457742	0.738742	-0.869438	-1.3006	1.8076	0	0	0	0	0
0	0	0	0	0	0	0	0	0	0	0	0	0	0	0	0	0	4.33326	0.493858	0.960734	1.33248	1.51842	0.801928	1.4559	0.181512	-0.0599389	-1.32468	1.97095	1.08318	0.740365	0.734119	-0.98483	-0.0284121	-0.884312	-0.562272	0	0	0	0	0
0	0	0	0	0	0	0	0	0	0	0	0	0	0	0	0	0	0	-5.47198	-0.838178	-0.0544495	0.447764	-0.853746	-0.504865	-0.103859	-0.00727031	0.695006	1.13017	-0.46842	0.0588702	0.75657	0.233383	0.486845	-0.443704	-0.577382	0	0	0	0	0
0	0	0	0	0	0	0	0	0	0	0	0	0	0	0	0	0	0	0	-3.68603	0.687508	-0.193551	-1.07178	-0.559677	-0.675305	1.09756	-0.030739	-1.29477	-1.37685	1.18008	-0.0772	-0.665345	1.42207	-0.982633	-0.808279	0	0	0	0	0
0	0	0	0	0	0	0	0	0	0	0	0	0	0	0	0	0	0	0	0	-4.00034	0.113001	0.511142	-0.357401	0.609871	1.32957	-0.904912	0.12954	0.324235	0.252771	0.0189101	-1.22952	0.49362	0.290392	0.767355	0	0	0	0	0
0	0	0	0	0	0	0	0	0	0	0	0	0	0	0	0	0	0	0	0	0	-4.29146	-0.00648683	0.807059	-1.15055	-0.786768	0.991845	0.0950299	0.362343	-0.152373	0.573348	1.53491	0.281611	0.875512	-0.898471	0	0	0	0	0
0	0	0	0	0	0	0	0	0	0	0	0	0	0	0	0	0	0	0	0	0	0	-4.22921	0.297478	-1.32039	0.487928	0.64497	-0.5802	0.0550062	-2.28671	-1.27307	1.14991	-0.0238281	0.32306	0.134183	0	0	0	0	0
0	0	0	0	0	0	0	0	0	0	0	0	0	0	0	0	0	0	0	0	0	0	0	-3.08143	-1.65865	1.38122	-0.549468	0.361636	-0.337719	0.331895	0.538985	2.07976	-1.77227	0.933191	-0.988693	0	0	0	0	0
0	0	0	0	0	0	0	0	0	0	0	0	0	0	0	0	0	0	0	0	0	0	0	0	2.63215	0.54578	0.00600064	-0.859565	-0.62349	-0.935328	1.10003	-0.891294	-0.163602	-2.13974	0.899882	0	0	0	0	0
0	0	0	0	0	0	0	0	0	0	0	0	0	0	0	0	0	0	0	0	0	0	0	0	0	3.87855	0.800333	0.813853	-1.47783	-0.707623	-0.0167906	-1.0277	-0.909298	1.18226	1.60471	0	0	0	0	0
0	0	0	0	0	0	0	0	0	0	0	0	0	0	0	0	0	0	0	0	0	0	0	0	0	0	2.40017	-0.366444	-0.0139941	0.261826	0.777167	0.527846	0.83229	1.27499	-0.0553851	0	0	0	0	0
0	0	0	0	0	0	0	0	0	0	0	0	0	0	0	0	0	0	0	0	0	0	0	0	0	0	0	-2.47918	-0.0914443	0.155592	0.901381	1.39662	-0.255556	0.414057	-0.439265	0	0	0	0	0
0	0	0	0	0	0	0	0	0	0	0	0	0	0	0	0	0	0	0	0	0	0	0	0	0	0	0	0	-2.664	1.3681	-0.450381	1.05912	-0.990823	-0.44718	-1.06613	0	0	0	0	0
0	0	0	0	0	0	0	0	0	0	0	0	0	0	0	0	0	0	0	0	0	0	0	0	0	0	0	0	0	2.61076	-1.42534	1.20148	1.18797	-1.20172	0.915487	0	0	0	0	0
0	0	0	0	0	0	0	0	0	0	0	0	0	0	0	0	0	0	0	0	0	0	0	0	0	0	0	0	0	0	1.39448	0.152505	1.55661	1.01719	0.510308	0	0	0	0	0
0	0	0	0	0	0	0	0	0	0	0	0	0	0	0	0	0	0	0	0	0	0	0	0	0	0	0	0	0	0	0	2.30679	-1.51378	-1.46048	-1.81609	0	0	0	0	0
0	0	0	0	0	0	0	0	0	0	0	0	0	0	0	0	0	0	0	0	0	0	0	0	0	0	0	0	0	0	0	0	-2.51356	0.873865	0.403028	0	0	0	0	0
0	0	0	0	0	0	0	0	0	0	0	0	0	0	0	0	0	0	0	0	0	0	0	0	0	0	0	0	0	0	0	0	0	-0.69018	0.234941	0	0	0	0	0
0	0	0	0	0	0	0	0	0	0	0	0	0	0	0	0	0	0	0	0	0	0	0	0	0	0	0	0	0	0	0	0	0	0	-0.602527	0	0	0	0	0
0	0	0	0	0	0	0	0	0	0	0	0	0	0	0	0	0	0	0	0	0	0	0	0	0	0	0	0	0	0	0	0	0	0	0	0	0	0	0	0
-5.52669	-1.05846	-0.0178473	2.17552	-0.406049	-1.61224	0.370664	-0.49695	0.557683	1.10358	-1.35053	0.993588	-1.66248	0.0926898	0.762689	-0.553148	0.721344	1.36939	0.664267	-0.499753	-0.627867	-0.643146	-0.899798	-0.0131342	-1.26274	-0.0175737	2.96938	1.03877	0.782902	-0.790442	-0.252335	-1.82522	-0.851071	-0.404801	-2.20298	0.449021	0	0	0	0
0	-5.65637	-0.665669	0.800587	0.750648	-1.10427	0.0751668	-0.601481	0.180608	0.13504	-0.229283	-0.299075	0.511141	-1.5861	-0.665037	1.78219	1.12686	0.784308	0.404643	0.918143	-2.28994	-0.549613	0.958268	-1.14585	2.24108	0.211347	-0.208142	1.3408	0.833859	0.771114	-2.05088	0.903845	2.84495	2.27049	-0.430219	-1.59996	0	0	0	0
0	0	6.31285	-1.296	-0.783873	-0.542559	0.512572	1.52003	-0.413286	-0.864758	-0.233799	0.782308	-1.41292	0.00741831	-0.690592	2.29711	0.71992	0.525196	0.855753	-2.04453	-1.46057	2.27283	0.859843	-0.670906	0.43855	-0.721289	1.23534	-0.336332	-0.933225	1.26789	1.36231	1.82038	-0.373093	-0.276338	-0.615792	0.559778	0	0	0	0
0	0	0	5.54196	0.856594	0.599419	0.689606	0.13957	0.443465	-0.169525	0.34323	0.598889	0.86132	1.54895	-0.690939	0.718965	-1.24831	0.564862	-0.678025	0.562164	0.778717	-1.07236	0.906281	0.112985	1.10467	-0.233492	-0.649281	-0.123437	-1.44241	-0.907259	0.141216	-1.22388	-0.911034	0.997321	0.391829	-0.929217	0	0	0	0
0	0	0	0	-6.03471	0.916938	1.73555	1.346	0.0332505	0.874212	-0.238442	0.292803	0.201661	0.382855	0.967784	0.304113	0.345779	-0.733207	-1.07883	-0.112615	-0.257881	-0.0145625	-1.73341	-0.429531	0.377684	-0.169501	-1.39716	-0.130619	-0.561467	0.611149	-0.364849	-0.31382	-0.518795	-1.6878	-0.963103	1.4887	0	0	0	0
0	0	0	0	0	-5.24334	-1.60388	1.30283	1.71737	1.38632	0.240648	0.335073	-1.09201	1.98079	0.224589	0.554276	1.04815	1.10262	-0.162285	1.4551	-0.737123	0.410846	-0.0888912	-0.295061	0.859463	0.425626	1.48862	0.622603	0.100895	1.78151	-0.210292	-0.252694	-0.923391	-1.01538	1.51292	-0.133656	0	0	0	0
0	0	0	0	0	0	-5.45323	-0.753041	0.963408	-0.268039	1.28299	0.341416	-0.938037	0.104224	1.49139	0.0285029	-0.637949	0.622869	-0.135745	-0.183232	0.323305	-1.44351	0.0770184	0.511283	0.257186	-0.528438	0.209897	1.3074	-0.0882654	0.996222	-0.170585	-1.51922	-0.222522	0.111861	0.826159	1.18115	0	0	0	0
0	0	0	0	0	0	0	-6.30781	-0.948861	-1.3734	0.106601	0.0426348	-0.322571	-0.77197	0.176195	2.49765	-0.705925	-0.4364	0.977126	0.771979	-0.85448	-0.605963	-0.20365	0.340847	-0.186133	0.561821	-1.3032	-0.124131	-0.330046	-2.49421	0.905521	-1.08877	-1.46767	0.493162	-0.192416	-0.755001	0	0	0	0
0	0	0	0	0	0	0	0	-5.21188	-0.977648	1.42143	0.105193	-0.843363	0.781673	0.0431908	-3.04758	1.1205	-0.181998	-1.20701	-0.381048	0.260288	0.679408	1.03777	0.31427	-0.883879	-0.290191	-1.12062	0.431778	1.17146	0.929415	-0.176908	-0.287579	-1.56112	-0.0508402	1.32019	1.25517	0	0	0	0
0	0	0	0	0	0	0	0	0	-3.63041	0.166595	1.07558	1.34043	-0.784095	0.293122	-0.950977	1.18912	0.270764	0.108337	-0.518256	0.643724	-0.312138	-0.357255	-0.631023	0.484811	-0.958094	-2.36927	1.35296	0.915629	-0.753439	-0.143499	0.413755	0.0124264	0.0587915	-0.664968	-0.369517	0	0	0	0
0	0	0	0	0	0	0	0	0	0	-4.72041	0.448751	-0.135527	-0.487064	-2.04993	-0.363138	0.823	0.0104218	-1.12361	-0.720251	-1.09381	0.716471	-1.47041	0.1575	0.714552	-1.59292	-1.53458	0.176773	2.3245	-1.36015	-1.80649	0.776961	-2.19244	0.30888	-0.766533	-0.712083	0	0	0	0
0	0	0	0	0	0	0	0	0	0	0	4.58787	-0.21974	-0.45426	-0.470863	0.0155875	-0.839075	-1.65546	1.51214	-1.40647	1.82935	0.501	-0.683489	-0.580012	1.12364	0.61585	-1.08191	1.03966	0.702969	0.698934	0.258585	2.44778	1.36271	-1.72903	-0.353825	-0.397319	0	0	0	0
0	0	0	0	0	0	0	0	0	0	0	0	-4.44759	-1.63301	0.105131	-1.10151	-2.33241	-1.54938	1.79363	-0.449707	0.143508	2.21211	1.13291	1.07956	0.804276	0.375084	-0.90864	1.38804	0.322812	1.80475	-0.375919	-0.879621	-2.09277	0.627861	0.351181	0.116873	0	0	0	0
0	0	0	0	0	0	0	0	0	0	0	0	0	3.7883	-0.651911	-1.82596	0.725736	1.56018	2.05819	1.58054	-1.21853	-1.83336	0.131488	-1.13072	-0.381479	-0.168578	-0.544422	1.99064	0.911269	-0.420748	1.44001	-0.0895654	-0.812913	-0.328567	-0.855044	1.46839	0	0	0	0
0	0	0	0	0	0	0	0	0	0	0	0	0	0	4.86697	0.0306735	0.959813	1.52956	0.962258	-0.314831	-3.29986	0.104663	-0.639574	0.440808	-0.142887	-1.3444	1.34589	1.88388	-0.0174468	2.27227	1.83222	0.274354	1.83581	0.462032	1.02886	0.760922	0	0	0	0
0	0	0	0	0	0	0	0	0	0	0	0	0	0	0	-4.66148	2.3777	2.21736	1.57587	0.463715	-1.45481	0.524554	0.165073	-0.242508	-0.375595	-0.0565204	0.479518	0.529872	0.50314	0.252875	1.6318	0.397136	-0.646237	0.585865	0.420716	0.869845	0	0	0	0
0	0	0	0	0	0	0	0	0	0	0	0	0	0	0	0	-5.14356	-0.48085	0.210708	-0.0479542	1.43698	0.00360547	1.74029	0.541188	-1.43222	1.17389	1.05034	0.650266	-0.423259	-0.274389	-1.66139	-0.437282	0.835334	0.699051	-0.905195	-0.284192	0	0	0	0
0	0	0	0	0	0	0	0	0	0	0	0	0	0	0	0	0	5.45011	-0.0978027	0.375654	0.407041	1.22919	-1.73922	3.79672	-0.358784	-0.27058	0.91833	0.927224	1.38956	-0.559209	1.1506	-1.09238	0.081637	0.408622	-0.376185	0.522746	0	0	0	0
0	0	0	0	0	0	0	0	0	0	0	0	0	0	0	0	0	0	4.24131	1.45901	-0.61644	-0.104066	0.615549	-0.26729	-0.310165	-1.71659	-0.107626	1.00544	1.53315	1.55989	1.17853	0.522969	-2.40847	-1.20776	-0.482396	-0.838567	0	0	0	0
0	0	0	0	0	0	0	0	0	0	0	0	0	0	0	0	0	0	0	-4.37226	-0.747482	0.214734	0.78996	-1.53015	-0.363585	-2.02497	-1.5801	1.21831	-0.0354737	1.92707	-1.47949	0.152218	-2.19041	0.0524184	-0.20889	0.67428	0	0	0	0
0	0	0	0	0	0	0	0	0	0	0	0	0	0	0	0	0	0	0	0	4.17223	-0.490931	-0.780067	0.359056	0.550162	0.0524425	-0.309457	-1.48814	-0.794453	-0.252187	-1.41991	0.790227	0.107154	1.4493	-0.490563	1.00721	0	0	0	0
0	0	0	0	0	0	0	0	0	0	0	0	0	0	0	0	0	0	0	0	0	-3.60369	-1.67778	0.455927	-0.580155	-0.874543	0.353427	1.13368	1.68248	0.357981	-0.468461	0.443101	-0.0618761	-0.627883	0.612381	0.00861112	0	0	0	0
0	0	0	0	0	0	0	0	0	0	0	0	0	0	0	0	0	0	0	0	0	0	3.32122	2.73331	-0.510837	1.07049	0.351938	-0.539245	-2.65939	2.5688	-0.504282	0.558461	-0.58005	-0.232443	-0.585658	0.761462	0	0	0	0
0	0	0	0	0	0	0	0	0	0	0	0	0	0	0	0	0	0	0	0	0	0	0	-3.95898	0.880964	-0.256964	0.835712	1.23675	-0.0154281	-0.197654	-0.599364	0.63105	-0.325499	1.47925	0.319117	-0.615949	0	0	0	0
0	0	0	0	0	0	0	0	0	0	0	0	0	0	0	0	0	0	0	0	0	0	0	0	4.325	0.113233	1.84669	0.732391	0.170149	-1.55454	0.185293	1.02105	-0.326456	-1.81351	-2.2093	-0.2675	0	0	0	0
0	0	0	0	0	0	0	0	0	0	0	0	0	0	0	0	0	0	0	0	0	0	0	0	0	1.97344	-1.027	0.153555	1.84444	0.776278	0.425169	0.83711	-2.23385	-1.75324	0.685324	0.450736	0	0	0	0
0	0	0	0	0	0	0	0	0	0	0	0	0	0	0	0	0	0	0	0	0	0	0	0	0	0	-3.82366	0.744584	-0.166952	-0.481536	-1.24798	0.782505	-0.379895	-0.458446	-0.175984	-0.261562	0	0	0	0
0	0	0	0	0	0	0	0	0	0	0	0	0	0	0	0	0	0	0	0	0	0	0	0	0	0	0	2.88833	-0.387876	0.128718	-0.280451	-0.856882	0.11785	-0.794568	0.137722	-0.742735	0	0	0	0
0	0	0	0	0	0	0	0	0	0	0	0	0	0	0	0	0	0	0	0	0	0	0	0	0	0	0	0	2.69743	0.164582	1.33173	-1.00055	-1.36623	1.27566	0.239148	0.0710749	0	0	0	0
0	0	0	0	0	0	0	0	0	0	0	0	0	0	0	0	0	0	0	0	0	0	0	0	0	0	0	0	0	-2.69738	-0.841327	1.18567	1.26737	-0.0432306	0.318679	0.88041	0	0	0	0
0	0	0	0	0	0	0	0	0	0	0	0	0	0	0	0	0	0	0	0	0	0	0	0	0	0	0	0	0	0	-4.00586	0.0349898	0.360867	0.192208	-1.97175	0.694215	0	0	0	0
0	0	0	0	0	0	0	0	0	0	0	0	0	0	0	0	0	0	0	0	0	0	0	0	0	0	0	0	0	0	0	-2.65907	-0.0399779	-0.145899	0.156527	0.569748	0	0	0	0
0	0	0	0	0	0	0	0	0	0	0	0	0	0	0	0	0	0	0	0	0	0	0	0	0	0	0	0	0	0	0	0	-2.03301	-0.817581	1.1427	-1.13789	0	0	0	0
0	0	0	0	0	0	0	0	0	0	0	0	0	0	0	0	0	0	0	0	0	0	0	0	0	0	0	0	0	0	0	0	0	1.1298	0.13687	-1.46988	0	0	0	0
0	0	0	0	0	0	0	0	0	0	0	0	0	0	0	0	0	0	0	0	0	0	0	0	0	0	0	0	0	0	0	0	0	0	-1.20795	-0.159413	0	0	0	0
0	0	0	0	0	0	0	0	0	0	0	0	0	0	0	0	0	0	0	0	0	0	0	0	0	0	0	0	0	0	0	0	0	0	0	-0.484004	0	0	0	0
0	0	0	0	0	0	0	0	0	0	0	0	0	0	0	0	0	0	0	0	0	0	0	0	0	0	0	0	0	0	0	0	0	0	0	0	0	0	0	0
-5.79877	0.338477	-1.44723	-0.936756	1.52011	0.291409	-1.02522	1.43677	-1.22302	0.324593	0.13945	-1.59612	-0.333083	0.304826	0.635787	0.583067	1.25636	-0.900417	0.438487	0.0665392	0.548215	0.218477	-0.902258	0.331664	0.112438	0.478944	0.636247	-0.934952	1.5639	0.420982	2.06193	-1.43053	1.25876	-0.563666	0.580105	0.517967	0.266848	0	0	0
0	-5.83056	-0.968678	-0.0813791	0.876306	0.657449	0.638214	-1.23918	0.488822	1.18666	-0.13025	0.11194	-1.4834	0.433829	1.61785	2.13767	1.44388	-0.843592	-0.184407	0.334187	-0.830083	-0.0612699	0.0406518	1.49645	-0.212605	1.15932	0.547007	1.32072	0.907285	-0.777071	0.30589	0.656359	0.654309	-0.562808	0.154882	0.629717	-0.374417	0	0	0
0	0	6.68633	-0.302664	0.309617	-1.54798	-1.15912	-0.521762	0.278911	0.336349	0.998131	0.682919	-0.981902	0.597209	0.688922	1.15969	0.601639	-1.90665	-0.0542334	0.867124	-1.50575	-0.0674837	-1.42021	0.00218445	0.18002	-0.0750649	0.156612	0.61489	0.0853476	-2.05063	-2.17103	-0.0332002	1.69829	-0.300714	-0.884921	0.980205	-2.01782	0	0	0
0	0	0	-5.79794	1.41942	1.10659	-1.07211	-1.1487	-1.3735	-0.383471	-0.383002	-0.0860579	-1.85385	-0.764239	1.21439	-0.6419	-0.0576997	0.364859	1.09412	-0.329634	2.1925	-0.934694	1.04559	-0.365127	-0.650083	-0.758614	-0.942868	0.598138	-0.707393	-2.1758	-0.463221	0.105979	0.35578	-1.40677	0.702237	0.820885	-0.436249	0	0	0
0	0	0	0	6.28582	0.34734	-1.57823	-0.877183	0.127941	-0.214579	0.104946	-0.0289636	0.767121	0.594487	0.735155	-0.779554	0.868716	-0.204749	0.292498	0.796026	-1.01981	-0.452933	0.485062	-0.159587	0.280377	-0.281498	1.78102	-0.513798	-1.59003	0.395259	0.137488	-0.12001	-0.209285	1.93726	-0.724064	0.262087	1.7496	0	0	0
0	0	0	0	0	-7.51612	1.10418	1.49801	0.196949	-0.491128	2.56338	-1.08163	0.127486	0.565777	0.468254	0.713223	0.642394	1.09316	-0.118925	-0.856481	1.01252	-0.142528	-1.84728	0.531404	-0.529339	-0.792631	-0.451119	0.303045	-0.287796	0.954827	0.131083	0.782879	1.37682	1.78826	-0.790689	0.0925158	1.77146	0	0	0
0	0	0	0	0	0	-5.13173	-0.842039	-0.766498	1.37913	-0.463627	-0.616031	0.106144	0.345211	0.189896	0.730956	-1.43386	-0.319093	-0.732715	0.432904	-2.4796	1.15341	0.287308	1.15616	0.126728	-0.487807	-0.463951	0.398902	-1.72412	0.266972	0.153923	0.450372	2.58798	0.454406	-0.523724	1.21646	0.674714	0	0	0
0	0	0	0	0	0	0	6.22996	-0.399605	-0.815206	-1.06468	-0.194912	0.0455986	1.30408	-0.232436	1.13759	0.18137	-0.644985	-1.7968	0.503712	0.204251	-0.456142	0.717574	0.516183	0.486474	-0.418967	0.433717	-0.561542	0.672439	0.46933	-0.170945	0.536491	1.28581	-0.0831781	0.330303	0.412106	1.13684	0	0	0
0	0	0	0	0	0	0	0	-7.18929	0.268194	0.39775	-0.000196214	-1.48306	-2.45766	1.03659	0.21736	-1.82145	-0.276296	1.35199	-0.304844	0.165202	0.712659	-0.377197	-0.0904094	-0.0230736	-0.962575	-2.33871	-3.32602	0.379839	-0.655052	0.588632	1.32107	-0.344406	-0.596332	-0.729669	0.111552	-0.539631	0	0	0
0	0	0	0	0	0	0	0	0	6.11585	-1.47523	2.49699	0.4801	-0.219635	-0.335702	-0.731485	-0.626957	-0.0274185	1.03027	-1.57268	0.0033452	2.23311	-0.12982	0.939092	0.559454	0.999849	-1.12017	-1.50198	0.0864638	1.32453	-0.240609	1.26143	-0.864157	1.44863	0.630581	-1.41225	0.0496859	0	0	0
0	0	0	0	0	0	0	0	0	0	-4.96766	-0.448402	0.0446503	0.524322	-2.91205	-0.224483	1.40262	-0.561314	-0.0705126	0.700215	-0.801061	0.324315	-0.792299	0.216967	-0.545859	0.226288	0.182221	0.130404	1.52628	-0.787752	-1.28635	0.122139	0.731571	-0.152738	1.34729	-1.37491	0.131874	0	0	0
0	0	0	0	0	0	0	0	0	0	0	5.38698	-0.961781	-0.161173	1.95656	0.131071	0.183654	-0.603116	0.248712	-0.892778	-1.38995	-0.0848343	0.0675994	0.54436	-0.29013	0.714803	0.752947	1.65047	-0.299163	0.365392	1.12691	-2.26069	-0.319515	0.575187	0.604778	-1.67942	1.65485	0	0	0
0	0	0	0	0	0	0	0	0	0	0	0	-4.31492	-0.0196442	1.18695	-2.08726	1.50309	1.30433	-0.146057	0.630582	-0.571689	-1.88703	-0.181463	-0.0969598	0.70474	0.419766	-1.0383	-0.172163	0.951069	1.18351	-1.26268	-0.849262	-0.576927	0.241008	0.148199	0.27692	-1.85784	0	0	0
0	0	0	0	0	0	0	0	0	0	0	0	0	-3.84915	0.407379	0.909611	0.2344	-1.97063	-0.13272	-1.04284	-0.376925	-1.22775	1.22482	-0.238615	-0.224017	-1.68518	-1.16449	2.41551	-0.746978	0.988176	1.18256	1.42746	-0.0545893	1.5753	0.0763826	0.263316	-2.17217	0	0	0
0	0	0	0	0	0	0	0	0	0	0	0	0	0	-4.1579	-1.2775	1.38276	0.121322	-0.555794	0.0884063	-0.753133	0.816358	-1.99546	1.04795	-1.09015	-1.19434	0.703747	0.548739	-1.35423	-0.140355	-1.97176	0.0637223	0.0338512	1.23307	0.321371	0.723879	0.886584	0	0	0
0	0	0	0	0	0	0	0	0	0	0	0	0	0	0	-4.97006	-1.03022	-0.735423	1.61411	0.433792	-0.584596	-0.692871	-0.0321921	-0.365978	0.146109	-0.324223	-1.52166	-0.275541	1.67478	-0.0545046	-0.779386	1.66295	-1.67065	-0.543814	-0.468	1.18406	0.0917015	0	0	0
0	0	0	0	0	0	0	0	0	0	0	0	0	0	0	0	-4.09152	0.516965	-0.717721	1.37747	-0.783806	-1.56797	-1.34424	1.12482	0.61915	0.0714132	-1.26662	-0.471473	-0.800913	0.4784	0.960236	0.794002	-1.20129	0.754274	0.889346	0.349032	0.949597	0	0	0
0	0	0	0	0	0	0	0	0	0	0	0	0	0	0	0	0	-3.64957	1.28026	0.415037	-0.947253	-0.986911	0.57954	-0.039405	0.599266	-0.455248	0.148483	-0.721513	0.553245	-0.0371596	-1.01897	-0.54167	-0.326752	0.409016	-0.567545	0.195518	-1.36289	0	0	0
0	0	0	0	0	0	0	0	0	0	0	0	0	0	0	0	0	0	5.94014	-0.179323	0.122944	1.14973	-1.77608	0.549755	0.854166	1.34411	-1.35186	-0.472027	1.98037	-1.07943	0.402811	1.00835	-0.235776	-0.373501	-1.47102	0.429383	1.23856	0	0	0
0	0	0	0	0	0	0	0	0	0	0	0	0	0	0	0	0	0	0	-3.49755	0.264042	0.428668	-1.41993	1.82927	-0.0441627	0.125519	0.110547	-0.355104	-1.80902	-0.0209453	-0.780526	0.715908	0.205097	1.61641	-0.7175	-0.952867	-0.836766	0	0	0
0	0	0	0	0	0	0	0	0	0	0	0	0	0	0	0	0	0	0	0	-4.4284	0.421771	-1.24239	-1.12394	0.465554	-0.902301	0.151524	0.288944	0.116183	0.183737	1.02773	0.41451	0.149528	0.413472	0.073678	1.60395	-0.528148	0	0	0
0	0	0	0	0	0	0	0	0	0	0	0	0	0	0	0	0	0	0	0	0	-3.68879	-0.124814	0.919684	1.11245	1.52463	-0.388306	-1.27244	-0.891856	-0.429618	0.0184053	0.87141	0.715145	-1.8566	0.341352	0.948466	-1.76028	0	0	0
0	0	0	0	0	0	0	0	0	0	0	0	0	0	0	0	0	0	0	0	0	0	-5.05011	-0.309697	1.33743	0.764152	0.159347	0.853726	-1.12287	1.82603	1.04194	1.03292	-0.898909	-1.73926	1.01565	-0.147026	0.616671	0	0	0
0	0	0	0	0	0	0	0	0	0	0	0	0	0	0	0	0	0	0	0	0	0	0	-3.60681	0.589186	-0.168261	0.848358	0.280629	-1.28463	-0.225511	-0.0642669	-0.0386827	-0.886543	-0.521793	0.00939065	0.93343	-0.357797	0	0	0
0	0	0	0	0	0	0	0	0	0	0	0	0	0	0	0	0	0	0	0	0	0	0	0	3.84221	-0.0690211	0.254096	-1.1892	-1.19007	-0.864536	0.204871	-1.60484	-0.0102871	0.394976	-0.0734579	-0.244555	0.720545	0	0	0
0	0	0	0	0	0	0	0	0	0	0	0	0	0	0	0	0	0	0	0	0	0	0	0	0	-2.43916	-0.374274	1.21419	1.47997	-1.56152	-0.171324	-0.756769	1.56926	-0.058801	0.245106	-0.484947	-1.92057	0	0	0
0	0	0	0	0	0	0	0	0	0	0	0	0	0	0	0	0	0	0	0	0	0	0	0	0	0	-3.553	-0.221303	-0.184544	0.906212	0.292397	-1.01028	-0.489996	0.211125	-1.64276	0.927932	1.35932	0	0	0
0	0	0	0	0	0	0	0	0	0	0	0	0	0	0	0	0	0	0	0	0	0	0	0	0	0	0	-3.2922	1.0343	-0.705449	1.13106	-0.326082	-1.4047	0.230581	-1.79356	-0.586149	0.195336	0	0	0
0	0	0	0	0	0	0	0	0	0	0	0	0	0	0	0	0	0	0	0	0	0	0	0	0	0	0	0	2.1153	-0.681167	-0.0362144	-0.587262	0.286628	0.740596	-0.549803	-0.241422	-0.808158	0	0	0
0	0	0	0	0	0	0	0	0	0	0	0	0	0	0	0	0	0	0	0	0	0	0	0	0	0	0	0	0	2.28799	-0.859157	-1.52969	0.256414	-0.267947	-1.08852	-1.90209	-0.332591	0	0	0
0	0	0	0	0	0	0	0	0	0	0	0	0	0	0	0	0	0	0	0	0	0	0	0	0	0	0	0	0	0	-2.41611	1.02392	-1.05685	-1.49975	-0.571361	0.275764	-0.618038	0	0	0
0	0	0	0	0	0	0	0	0	0	0	0	0	0	0	0	0	0	0	0	0	0	0	0	0	0	0	0	0	0	0	-1.188	2.07192	0.190111	-0.593705	-1.47519	0.963175	0	0	0
0	0	0	0	0	0	0	0	0	0	0	0	0	0	0	0	0	0	0	0	0	0	0	0	0	0	0	0	0	0	0	0	2.47095	0.0966219	0.0970831	0.358187	-0.0353488	0	0	0
0	0	0	0	0	0	0	0	0	0	0	0	0	0	0	0	0	0	0	0	0	0	0	0	0	0	0	0	0	0	0	0	0	-2.44629	-0.00394758	0.139829	-1.03083	0	0	0
0	0	0	0	0	0	0	0	0	0	0	0	0	0	0	0	0	0	0	0	0	0	0	0	0	0	0	0	0	0	0	0	0	0	-1.48177	0.0927045	-1.45716	0	0	0
0	0	0	0	0	0	0	0	0	0	0	0	0	0	0	0	0	0	0	0	0	0	0	0	0	0	0	0	0	0	0	0	0	0	0	-1.76317	0.64798	0	0	0
0	0	0	0	0	0	0	0	0	0	0	0	0	0	0	0	0	0	0	0	0	0	0	0	0	0	0	0	0	0	0	0	0	0	0	0	-0.85311	0	0	0
0	0	0	0	0	0	0	0	0	0	0	0	0	0	0	0	0	0	0	0	0	0	0	0	0	0	0	0	0	0	0	0	0	0	0	0	0	0	0	0
-5.10699	0.549276	-1.08306	0.835391	0.218662	1.8614	1.33411	0.0968397	0.643139	-0.580373	0.387656	-1.74877	-0.766617	-0.909109	0.0499663	0.46569	-0.795273	-0.122826	-1.30628	-1.44158	0.711576	-0.202438	-0.306366	-0.145916	-0.460896	1.68419	0.6968	0.109874	-1.66231	0.603844	-1.13721	1.4551	0.0306051	1.08828	-0.80758	-0.536647	0.450951	-0.397522	0	0
0	7.16906	-0.507836	-0.900457	0.734866	-0.713514	-1.00402	1.18835	0.590703	-1.16428	-0.801325	-0.26822	-0.633023	0.380415	-0.720172	0.701594	0.345462	0.56443	0.0804786	-0.714396	0.241853	-0.594135	-0.754014	0.755465	-0.101888	-0.973947	0.504416	1.02111	-0.0829405	-0.271093	-0.557999	-1.62124	1.18328	-1.16015	1.31715	-0.758622	1.0613	0.213588	0	0
0	0	5.69171	-0.185439	0.471284	-0.258792	0.11036	-0.984714	1.71329	-0.952012	-1.39833	0.539935	-0.211522	0.618819	-0.349196	0.638541	0.964939	0.280664	-0.966622	-0.472058	-0.155694	2.15271	-0.300593	-0.369748	-1.46302	0.254195	0.93592	0.57486	0.431602	1.94188	0.0313687	-0.0215291	-0.732895	-0.130943	1.84766	0.513934	0.474126	-0.733543	0	0
0	0	0	-6.89269	0.621558	0.483744	-0.47592	-0.344748	0.361329	-0.217659	-0.037616	-0.41917	-1.35507	-0.696737	0.670775	0.890744	0.607657	0.25668	-0.169455	-0.145529	-0.678097	-1.35656	-0.975877	-0.61832	-1.16736	-1.93608	0.569997	1.73991	1.47308	-1.95199	1.08879	0.110041	1.44907	-0.0973147	-1.47341	-0.350997	-0.941161	-1.15502	0	0
0	0	0	0	-4.7228	-0.813127	-0.7223	1.31622	-1.73215	0.631493	0.725226	-1.58444	0.0198399	-2.2228	0.748216	1.45055	-1.29144	0.0892356	-1.26658	1.01383	0.388003	-0.944566	0.933312	1.09148	0.8269	-1.20323	0.532057	-0.627309	-0.0529233	-0.100481	0.787577	-0.469493	-0.0516342	-1.72915	0.097755	0.111737	0.771963	-0.387568	0	0
0	0	0	0	0	6.57323	-0.662928	-1.25909	0.752105	0.0874329	0.635095	-1.18078	1.25401	-0.320469	2.49458	-1.40161	-0.601679	0.111914	-2.01024	-0.263919	-1.73522	-0.9211	0.228848	-0.15906	0.148057	-0.109999	-1.81171	-0.468523	0.323459	-0.0538003	-2.1519	-2.09214	2.17685	1.33278	0.932701	1.1022	-1.54213	1.30781	0	0
0	0	0	0	0	0	-5.17308	0.265123	2.4178	0.673957	-0.0392741	-0.522752	0.585067	-1.68333	-0.619814	-1.18866	-2.50552	1.47954	-0.0681055	0.428788	-1.11206	0.434601	-0.440016	-1.04932	-1.37768	-0.895555	-1.38568	-1.11609	1.35445	1.49777	-1.51594	0.525847	0.300929	-0.524219	0.705844	-2.04534	0.252366	2.36599	0	0
0	0	0	0	0	0	0	-5.42656	1.32414	-0.195717	0.122721	0.662293	-0.0247592	0.0673922	-1.05902	-2.90717	0.301251	0.476758	-0.539876	0.371749	-2.42575	0.169856	0.414312	0.0331916	0.564447	-2.24817	-0.605922	0.913009	-0.666404	-0.499606	-0.598807	0.209759	0.372346	-0.551194	1.21039	-0.0124369	0.379139	-0.720077	0	0
0	0	0	0	0	0	0	0	-6.10005	0.104651	-1.14688	1.78816	-0.603404	0.937029	-0.346649	-0.942204	0.0101112	1.17183	-0.360609	-0.728084	0.931162	-1.41967	-0.0573779	-1.07461	1.56534	1.30307	1.25245	-0.609157	-0.0534925	1.79618	-0.40258	1.25079	-0.386484	-0.114185	0.36286	-0.995776	2.27485	-0.216141	0	0
0	0	0	0	0	0	0	0	0	5.35499	1.44346	1.355	2.03847	-0.758342	1.3246	0.00137203	0.109518	-1.42813	-0.394037	-0.67065	-0.936967	-1.47409	-0.819683	-1.09857	0.117186	-0.631398	0.35636	-0.639729	-1.02203	-0.396335	0.205526	0.0445436	0.194233	-1.66415	-0.25126	0.401957	-0.78001	-0.698107	0	0
0	0	0	0	0	0	0	0	0	0	-5.75771	1.05711	1.17685	-2.58505	-1.89079	-0.682532	-0.715647	-0.0632439	1.8511	0.345743	0.707803	1.13495	-0.111128	-0.481715	1.29449	0.304584	0.167271	-0.708733	-0.502021	0.448072	0.144714	0.269161	-0.0364563	-1.56884	0.746018	0.400582	-2.30177	-0.0890411	0	0
0	0	0	0	0	0	0	0	0	0	0	5.74598	-1.03953	1.12464	-0.465675	-0.264974	-0.524552	-0.458719	-1.37709	-0.408771	0.0564605	0.347818	-0.0519728	-0.314944	1.23556	-1.5044	-0.693337	0.556757	-0.934739	-1.08331	-0.749754	0.551313	1.47262	-1.26542	0.502691	-1.02079	-0.806046	0.0391711	0	0
0	0	0	0	0	0	0	0	0	0	0	0	-4.36477	0.123758	0.612604	-0.270182	-0.703726	-2.14391	0.709999	1.60668	0.609684	-0.437409	1.33103	-0.101093	-0.10239	1.56041	-0.392511	1.08659	1.42441	-0.955166	0.330685	-1.31049	0.756505	0.323257	0.539471	0.201027	-0.71653	0.127292	0	0
0	0	0	0	0	0	0	0	0	0	0	0	0	6.20316	0.193554	1.58241	-1.4763	1.20122	-0.223863	0.978623	0.0825332	0.477976	0.760299	-0.794184	2.24655	1.28403	-1.40461	-0.634359	-1.10027	1.12525	-2.06961	-1.81786	0.934528	0.596662	0.45699	-0.699813	-0.494167	-1.35704	0	0
0	0	0	0	0	0	0	0	0	0	0	0	0	0	-4.09857	-2.40838	-0.0908313	-0.0367435	2.02775	0.582758	-0.575173	0.544707	0.797757	0.208346	0.180982	-0.571313	-0.0206131	-1.1012	0.277986	1.33141	0.617943	0.235955	0.479314	-1.38207	1.10501	0.0534626	0.0244176	0.62922	0	0
0	0	0	0	0	0	0	0	0	0	0	0	0	0	0	-4.3801	0.266738	-1.15093	-0.36814	0.640403	-0.0595545	-0.261594	0.75456	1.14706	0.204106	-0.422935	0.422817	-0.805626	0.0798292	0.295278	-0.718341	-0.999656	-0.492528	0.966624	1.33992	1.13543	-0.638883	1.25532	0	0
0	0	0	0	0	0	0	0	0	0	0	0	0	0	0	0	4.34883	-1.44892	1.58991	0.516837	0.0692202	0.278836	-0.221868	-0.162446	-1.49279	-0.460754	0.221438	-0.474729	-0.0474471	-0.455437	-1.64473	-1.364	-0.10074	2.13267	-0.413562	-0.218203	-0.767336	-0.526676	0	0
0	0	0	0	0	0	0	0	0	0	0	0	0	0	0	0	0	5.58441	-1.30825	-0.995922	-0.33719	-0.460081	0.563403	0.551918	0.846111	0.406191	0.332961	0.338543	-0.96749	-0.680412	-0.65315	0.5858	0.462357	-0.79304	2.03055	-0.255635	-0.662211	1.74811	0	0
0	0	0	0	0	0	0	0	0	0	0	0	0	0	0	0	0	0	5.49412	0.692859	0.932619	-0.663107	0.265067	1.13973	-0.151754	0.0777989	0.0333323	-0.643406	-0.0705167	1.21599	1.32634	0.284529	0.115803	-1.12073	1.79502	0.00404649	-0.400559	-0.780343	0	0
0	0	0	0	0	0	0	0	0	0	0	0	0	0	0	0	0	0	0	4.59966	-0.348182	-0.540865	-0.378725	-0.932318	1.23986	-0.0652235	0.742765	-1.15266	-0.811513	1.14754	-0.175263	0.648839	1.46224	0.250466	-0.162617	0.0702541	-0.836249	-0.295751	0	0
0	0	0	0	0	0	0	0	0	0	0	0	0	0	0	0	0	0	0	0	-4.8326	2.47112	0.119217	-0.322349	0.0221995	-1.17966	-1.0802	0.320953	1.92352	1.23277	0.621617	0.0843935	0.239129	0.970489	1.08183	-0.0861996	0.0647845	-0.548881	0	0
0	0	0	0	0	0	0	0	0	0	0	0	0	0	0	0	0	0	0	0	0	-4.41793	-1.48326	0.101699	-0.533034	0.421607	0.417991	0.500188	0.256964	0.660138	-0.162191	1.58241	1.64715	0.372171	-1.04137	1.64706	-0.817979	0.0141342	0	0
0	0	0	0	0	0	0	0	0	0	0	0	0	0	0	0	0	0	0	0	0	0	3.27361	0.830083	-1.13909	1.4902	-0.36253	1.0236	-1.24226	-0.471009	-1.12329	0.476652	-0.217171	0.379931	-1.68081	0.759081	0.880231	-0.550039	0	0
0	0	0	0	0	0	0	0	0	0	0	0	0	0	0	0	0	0	0	0	0	0	0	-3.50633	-0.973388	-0.17203	-0.588596	-1.4694	0.691968	1.51876	-0.678717	1.54446	0.29603	0.504477	0.861528	0.162977	-0.618857	-0.0604067	0	0
0	0	0	0	0	0	0	0	0	0	0	0	0	0	0	0	0	0	0	0	0	0	0	0	3.29958	-0.742653	-0.0962113	0.0105509	-0.306562	-0.325891	1.07503	0.363021	-0.972146	0.708329	-1.18757	-0.0758677	0.663503	-1.80318	0	0
0	0	0	0	0	0	0	0	0	0	0	0	0	0	0	0	0	0	0	0	0	0	0	0	0	-2.73146	-0.583189	-0.318865	-1.04362	-0.077238	-1.37919	0.738566	0.777072	-1.02189	0.578538	1.99549	0.580579	0.41047	0	0
0	0	0	0	0	0	0	0	0	0	0	0	0	0	0	0	0	0	0	0	0	0	0	0	0	0	2.51912	-0.209549	-0.572047	0.628429	0.62612	0.816271	0.44238	-1.24292	-0.527643	-0.541355	-0.0846084	0.00801822	0	0
0	0	0	0	0	0	0	0	0	0	0	0	0	0	0	0	0	0	0	0	0	0	0	0	0	0	0	-3.43996	0.0975943	-0.94238	2.13141	-0.352807	0.879523	-0.943879	0.285976	0.311065	0.73905	0.992519	0	0
0	0	0	0	0	0	0	0	0	0	0	0	0	0	0	0	0	0	0	0	0	0	0	0	0	0	0	0	-3.1304	-0.657346	1.67605	0.532974	2.04119	0.436905	1.68219	-0.0101796	-0.693752	0.933913	0	0
0	0	0	0	0	0	0	0	0	0	0	0	0	0	0	0	0	0	0	0	0	0	0	0	0	0	0	0	0	-2.71479	0.324111	0.627494	0.00621505	0.30812	-1.03722	-0.368518	0.965252	-0.127012	0	0
0	0	0	0	0	0	0	0	0	0	0	0	0	0	0	0	0	0	0	0	0	0	0	0	0	0	0	0	0	0	2.90585	-0.569953	0.509437	-1.63835	-1.79562	0.221555	0.46709	0.152976	0	0
0	0	0	0	0	0	0	0	0	0	0	0	0	0	0	0	0	0	0	0	0	0	0	0	0	0	0	0	0	0	0	-1.99321	0.727704	1.54943	-0.96951	0.788979	-0.119723	-0.325035	0	0
0	0	0	0	0	0	0	0	0	0	0	0	0	0	0	0	0	0	0	0	0	0	0	0	0	0	0	0	0	0	0	0	-2.92381	-0.264131	-0.665695	-0.422649	0.114298	-2.04264	0	0
0	0	0	0	0	0	0	0	0	0	0	0	0	0	0	0	0	0	0	0	0	0	0	0	0	0	0	0	0	0	0	0	0	1.44772	1.70399	-0.059065	0.0764826	0.358703	0	0
0	0	0	0	0	0	0	0	0	0	0	0	0	0	0	0	0	0	0	0	0	0	0	0	0	0	0	0	0	0	0	0	0	0	3.22956	-0.067792	-0.875742	0.574404	0	0
0	0	0	0	0	0	0	0	0	0	0	0	0	0	0	0	0	0	0	0	0	0	0	0	0	0	0	0	0	0	0	0	0	0	0	-1.29154	2.66938	-0.658802	0	0
0	0	0	0	0	0	0	0	0	0	0	0	0	0	0	0	0	0	0	0	0	0	0	0	0	0	0	0	0	0	0	0	0	0	0	0	-0.487746	-0.864716	0	0
0	0	0	0	0	0	0	0	0	0	0	0	0	0	0	0	0	0	0	0	0	0	0	0	0	0	0	0	0	0	0	0	0	0	0	0	0	1.50067	0	0
0	0	0	0	0	0	0	0	0	0	0	0	0	0	0	0	0	0	0	0	0	0	0	0	0	0	0	0	0	0	0	0	0	0	0	0	0	0	0	0
6.30464	1.95623	-0.39785	0.132199	1.79313	-0.448183	-0.164703	-0.11247	-0.999726	1.15234	-0.0131776	-0.595216	1.02964	-0.0824482	0.0296201	-1.12026	-0.462716	-0.701044	2.55354	0.300725	-1.74763	0.201911	0.37499	0.791577	-0.649652	-0.182307	1.52529	0.278015	-1.13528	-0.0475395	-1.47335	-0.518137	-1.63827	-0.852266	0.708361	1.86221	0.823612	-1.31706	0.632767	0
0	6.5067	0.262845	0.594224	0.292548	-0.798438	-0.597232	-0.351966	-0.967371	0.761028	0.511138	-1.09875	-2.11879	-0.0768694	1.13507	0.273632	0.133222	-0.918695	-0.605929	1.04189	-1.01188	-1.43636	-1.07631	-0.586519	0.725112	-0.830546	-0.822889	0.148388	-0.414768	-0.198643	0.869632	0.126518	0.812487	0.173197	-0.0812283	1.23813	0.566981	-0.666034	-2.03776	0	-0.0948345
0	0	6.28658	-1.03523	-0.9648	0.297799	0.100691	-1.34793	0.696014	1.48831	0.907737	3.31773	-1.26984	-3.01501	-1.77244	0.674473	0.477851	-2.62157	1.09556	-1.43047	-0.00111969	-0.701804	-0.355542	-0.886662	-0.13177	0.411507	-1.02179	0.0716467	0.353481	-0.340306	-0.465387	-0.0943616	1.19251	-0.750091	1.70941	0.0463304	1.04106	1.75266	1.06837	0	-0.492814
0	0	0	-5.428	0.773812	-1.2032	-0.25033	-0.558257	-0.377153	0.811265	-0.276449	0.709071	-0.36878	-0.436998	0.717676	-1.55107	1.60888	-0.917706	-0.379843	2.02861	1.96854	-0.480856	-0.527757	-0.565197	0.423372	-0.943111	1.11405	1.78523	-0.526847	1.49932	1.24697	-0.248325	0.77424	-1.72877	0.724423	0.833902	0.463251	1.27167	0.0551003	0	0.00496163
0	0	0	0	-5.29635	-0.78181	1.06216	-0.643256	0.525201	-1.33051	-0.573617	0.195636	1.62642	-0.398417	0.702797	1.43684	-0.735698	0.46113	-0.220217	0.387799	0.11784	-0.374429	0.165351	2.13519	-1.40031	-0.453186	1.71068	-0.879902	0.213855	0.224898	1.12339	1.68815	0.0647328	-1.00933	0.53513	1.28834	0.852507	1.33046	1.40304	0	0.261938
0	0	0	0	0	-5.78359	-0.408732	0.140878	1.14214	-1.48216	-0.567203	0.253456	0.342489	0.0387896	0.676727	0.936051	0.374717	1.52409	0.77586	-0.107818	0.714806	-1.045	-0.64241	0.365997	-1.21101	0.767764	-0.822089	1.03575	0.0910111	-0.571904	-0.235143	2.21372	0.601729	-0.0368979	0.204108	-0.712444	0.67251	-1.01352	-1.31431	0	-0.200851
0	0	0	0	0	0	-6.13089	-0.0118488	0.880904	-0.335295	0.481179	-0.855933	1.45374	-1.79934	0.943286	-0.413068	0.209406	-1.12867	1.45509	-0.684527	1.0896	-1.2147	0.572588	1.54687	0.416754	2.56342	0.277298	-0.316879	-0.36006	1.21293	1.27366	0.298364	0.693419	0.859322	-1.04799	0.690449	0.056031	-0.371755	0.211984	0	0.17761
0	0	0	0	0	0	0	-5.81981	0.290762	0.527284	-0.945338	-0.28013	0.361482	1.74966	0.547567	0.831958	-0.36594	-0.765415	1.29431	-0.240992	0.154652	0.885871	-0.734084	-0.923013	0.964459	0.736014	-0.452626	1.23141	-1.75919	1.2138	0.444545	0.114636	1.7023	-0.0913942	-1.04595	-0.564113	0.602767	1.05598	-1.80058	0	0.25258
0	0	0	0	0	0	0	0	-6.11759	-0.389172	0.189533	0.848884	-0.52179	-0.173629	0.227164	-0.471313	0.629944	-1.16973	0.39133	-0.266216	-2.74539	-0.140956	1.21701	-0.67709	-0.531982	-1.04913	-0.056199	-0.563691	1.17478	0.09759	-0.152731	0.825376	0.842605	-0.926083	0.885738	-0.738917	1.55548	-1.70169	0.860108	0	0.146607
0	0	0	0	0	0	0	0	0	4.87733	-0.738429	0.680655	2.05126	0.659965	-1.35679	0.0434158	-0.200737	0.0238628	-0.187403	-0.413264	-0.041323	-0.417419	1.18908	-0.440102	-0.256778	-1.85692	1.22905	-0.96668	-0.175543	0.840801	-1.02029	-1.7615	1.08988	2.01212	0.265343	0.0358823	-0.00130577	-0.0327348	0.958369	0	-0.240899
0	0	0	0	0	0	0	0	0	0	-4.39943	-2.08903	0.500758	-1.59913	0.883041	-0.389534	2.54875	0.782901	1.80913	0.819131	0.940459	1.55258	-0.86272	-0.121787	-0.156552	-0.331236	-1.12823	1.9832	-2.06687	-0.0639806	-1.60693	-0.0234703	-0.469667	0.70861	1.06807	0.396142	0.921416	1.02239	0.361761	0	0.262051
0	0	0	0	0	0	0	0	0	0	0	4.95489	0.0484455	-0.268009	-0.22045	0.270309	-0.21198	0.460802	1.10821	0.0766276	0.665267	1.11068	-1.34809	-0.388875	1.01657	1.15261	1.19523	-0.447746	-1.11371	0.485739	0.848342	-0.382126	-0.175527	-0.136605	0.266551	0.159934	-0.460563	0.873105	-0.214377	0	-0.0468054
0	0	0	0	0	0	0	0	0	0	0	0	-4.81474	0.614992	0.700589	-0.352718	1.15469	0.844355	-0.882511	0.340757	-1.15763	-0.297963	-1.43631	-2.97766	-1.14343	-0.399972	-0.43339	0.223411	0.312705	-0.852831	0.47995	-0.375368	2.42096	1.07882	-1.35835	0.468637	0.620092	-0.177224	-0.0865782	0	0.0729453
0	0	0	0	0	0	0	0	0	0	0	0	0	-4.51334	0.737146	-1.866	-0.0235269	-0.252018	1.3986	-1.16595	-0.207739	-0.868243	0.262794	0.338027	-0.249596	0.126984	0.664278	-0.000989599	0.92896	-0.411814	2.0222	0.255703	-1.1176	0.66746	2.25741	-2.21349	1.25144	0.061875	-0.990505	0	0.011051
0	0	0	0	0	0	0	0	0	0	0	0	0	0	5.7801	0.873363	1.75362	-0.128331	1.55112	-1.38776	-1.07415	0.375986	0.437078	0.23838	-0.731078	-0.201508	1.09297	0.21931	0.538456	-1.38618	2.44792	0.582869	-1.10954	0.19216	-1.43457	-1.13948	0.501664	1.02309	-0.464662	0	0.0955958
0	0	0	0	0	0	0	0	0	0	0	0	0	0	0	5.07517	0.851351	1.34363	0.586429	0.976323	1.68071	0.203985	-0.729842	-1.16705	-0.1717	0.375063	0.0645385	-1.21215	-0.810344	-0.760792	1.72969	-0.912931	0.309548	0.610196	-1.91005	0.810297	-0.39881	0.794469	-0.306946	0	0.0287023
0	0	0	0	0	0	0	0	0	0	0	0	0	0	0	0	4.91221	1.21925	1.03709	-0.699799	-1.0049	0.709044	0.362338	-0.471154	-1.77242	0.648148	0.250038	0.13276	0.376908	-0.56472	0.524476	1.94863	0.614694	-0.740197	-0.39654	-0.987787	-0.650514	0.36692	1.1697	0	0.400764
0	0	0	0	0	0	0	0	0	0	0	0	0	0	0	0	0	-4.14451	0.0247378	-1.15289	0.786367	0.123705	0.542478	1.3126	-0.307579	-0.228794	0.345267	-3.32899	-1.75398	-0.737103	0.85483	-0.546084	-0.734637	-1.6289	-0.111505	0.733211	-0.249127	0.920672	0.0731664	0	-0.438766
0	0	0	0	0	0	0	0	0	0	0	0	0	0	0	0	0	0	4.9316	0.652633	0.980963	0.179446	0.863604	1.68526	1.40111	-0.654039	1.36121	0.416226	1.89397	-0.604667	-0.201973	-0.847998	0.495268	1.00522	1.30813	0.706012	0.234983	0.954641	-1.50086	0	-0.260238
0	0	0	0	0	0	0	0	0	0	0	0	0	0	0	0	0	0	0	-3.86773	1.40495	0.401768	2.04614	-1.30628	1.32415	-0.0791882	-0.255259	0.181965	-0.538402	-1.02587	-1.57119	-0.737854	0.984976	-0.212027	-0.103791	0.502661	-0.0936331	-0.108334	0.558273	0	0.0443689
0	0	0	0	0	0	0	0	0	0	0	0	0	0	0	0	0	0	0	0	4.32374	-1.43158	-0.349536	1.12561	-0.72705	-0.684086	-0.563581	1.20522	1.59813	0.770855	0.457757	0.683795	-2.15021	-1.42218	0.823934	0.42532	-2.13804	0.532548	-1.06798	0	0.275895
0	0	0	0	0	0	0	0	0	0	0	0	0	0	0	0	0	0	0	0	0	3.29457	0.238628	0.881361	-0.580954	-0.260228	-1.2856	-0.210251	0.86265	-0.855983	-0.440959	-0.700609	0.9061	-0.451369	-0.990128	-0.394602	-0.8553	0.346006	0.330484	0	-0.283548
0	0	0	0	0	0	0	0	0	0	0	0	0	0	0	0	0	0	0	0	0	0	-4.215	-1.10994	-0.42642	1.14454	-1.0912	1.51331	-0.567753	1.53738	-0.109169	-1.39619	0.84161	2.03175	0.873407	0.817594	1.2866	-0.311018	-0.215805	0	0.072678
0	0	0	0	0	0	0	0	0	0	0	0	0	0	0	0	0	0	0	0	0	0	0	-4.26025	0.365245	-1.6582	0.294072	1.02145	1.05428	-0.360661	0.54943	-1.06724	-0.480195	0.145772	-0.907534	-0.205083	-0.179693	-0.144546	1.22108	0	-0.120049
0	0	0	0	0	0	0	0	0	0	0	0	0	0	0	0	0	0	0	0	0	0	0	0	-4.68467	0.395481	0.100014	0.129895	0.385037	-0.787183	1.67187	1.18962	0.108659	0.393204	0.187965	-1.04411	-0.376447	-1.27727	1.23556	0	-0.181248
0	0	0	0	0	0	0	0	0	0	0	0	0	0	0	0	0	0	0	0	0	0	0	0	0	-2.64733	0.915284	-0.527	-0.33218	-0.0602998	1.63137	1.38417	-0.455349	1.99074	0.312091	0.20131	-2.09806	1.04967	-0.584462	0	0.194284
0	0	0	0	0	0	0	0	0	0	0	0	0	0	0	0	0	0	0	0	0	0	0	0	0	0	3.08336	-0.546739	-0.766178	1.51244	-0.470387	-0.316148	0.630881	0.484647	-1.52743	0.153396	0.0718362	0.358926	0.399036	0	-0.0472527
0	0	0	0	0	0	0	0	0	0	0	0	0	0	0	0	0	0	0	0	0	0	0	0	0	0	0	-3.31067	0.888246	0.63053	-1.67527	-1.71651	0.719363	-0.311817	1.86178	0.757342	-0.552137	-0.298105	1.69454	0	-0.189673
0	0	0	0	0	0	0	0	0	0	0	0	0	0	0	0	0	0	0	0	0	0	0	0	0	0	0	0	3.30863	-0.84023	1.57077	-1.00227	-1.72898	-1.23351	-1.11542	-0.463559	1.44967	-1.43854	-0.0658083	0	0.331053
0	0	0	0	0	0	0	0	0	0	0	0	0	0	0	0	0	0	0	0	0	0	0	0	0	0	0	0	0	-3.56407	-0.148716	0.85621	-0.513741	0.947224	1.65496	0.529693	1.40006	0.207507	-1.82378	0	-0.246318
0	0	0	0	0	0	0	0	0	0	0	0	0	0	0	0	0	0	0	0	0	0	0	0	0	0	0	0	0	0	4.76814	0.275313	0.0205234	-1.18186	-2.0056	1.10892	1.24932	-1.69865	-0.218016	0	0.112042
0	0	0	0	0	0	0	0	0	0	0	0	0	0	0	0	0	0	0	0	0	0	0	0	0	0	0	0	0	0	0	3.052	0.185481	0.0849029	-0.0612882	-1.2231	0.405533	-1.98565	0.274319	0	-0.27249
0	0	0	0	0	0	0	0	0	0	0	0	0	0	0	0	0	0	0	0	0	0	0	0	0	0	0	0	0	0	0	0	1.71937	1.06256	0.226367	-1.652	0.608912	0.558987	-0.54438	0	0.0276146
0	0	0	0	0	0	0	0	0	0	0	0	0	0	0	0	0	0	0	0	0	0	0	0	0	0	0	0	0	0	0	0	0	1.92394	-1.29057	-0.32487	0.304706	1.33657	0.0240266	0	-0.108669
0	0	0	0	0	0	0	0	0	0	0	0	0	0	0	0	0	0	0	0	0	0	0	0	0	0	0	0	0	0	0	0	0	0	-2.54645	1.17202	-1.01227	0.135813	1.49934	0	0.123404
0	0	0	0	0	0	0	0	0	0	0	0	0	0	0	0	0	0	0	0	0	0	0	0	0	0	0	0	0	0	0	0	0	0	0	-0.94634	-0.221879	0.529588	0.612382	0	0.307951
0	0	0	0	0	0	0	0	0	0	0	0	0	0	0	0	0	0	0	0	0	0	0	0	0	0	0	0	0	0	0	0	0	0	0	0	0.904374	-1.58209	-1.11514	0	0.239398
0	0	0	0	0	0	0	0	0	0	0	0	0	0	0	0	0	0	0	0	0	0	0	0	0	0	0	0	0	0	0	0	0	0	0	0	0	-0.737522	-0.268627	0	-0.151239
0	0	0	0	0	0	0	0	0	0	0	0	0	0	0	0	0	0	0	0	0	0	0	0	0	0	0	0	0	0	0	0	0	0	0	0	0	0	0.394855	0	0.139538
0	0	0	0	0	0	0	0	0	0	0	0	0	0	0	0	0	0	0	0	0	0	0	0	0	0	0	0	0	0	0	0	0	0	0	0	0	0	0	0	-0.446583
-7.44978	-0.532086	0.141079	1.14941	-0.986138	-0.432202	-1.54984	-0.955462	0.141008	-1.74793	-0.235476	-1.84115	-0.968611	-0.882886	0.0497617	-1.51236	-0.182069	0.620521	-0.763065	0.737545	-0.208736	0.37447	0.240986	0.853474	-0.451723	-0.814743	-1.07835	0.674258	-0.0962497	-0.265419	0.817872	0.342086	-1.95269	2.07164	-1.5358	0.0677155	0.41925	1.59118	1.92403	-0.377248	0.0709332
0	5.74645	-0.921568	-0.184912	1.37968	-1.34113	-1.47493	-0.422326	-0.887951	0.199947	0.473387	-0.619375	-1.42396	0.425532	-1.3713	-0.778147	-0.166118	0.155933	-1.95357	-1.58125	-0.502949	0.0613489	1.44757	0.38247	0.487705	-0.36687	-0.551834	1.57511	-0.00606767	-0.436951	1.77032	0.319628	0.380812	2.28337	-0.343048	-1.00053	-0.994369	0.10804	-0.102173	-1.9604
0	0	-6.12055	-0.0632088	-0.653631	-0.643381	-1.06054	-2.50727	0.114173	0.46359	-0.707447	1.93493	0.674376	1.29562	0.434198	-0.182471	-1.46692	-1.07771	0.563021	1.00357	1.12769	0.229732	0.403483	0.4739	-1.74886	0.161775	0.716151	1.59461	-0.721494	-0.726368	-0.18037	-0.00305581	-0.938821	0.092361	-0.121451	-0.0129551	-0.302698	-0.420404	-0.618691	0.0197372
0	0	0	5.87915	0.619803	1.80996	0.77483	0.209849	-0.478715	-0.34338	0.696134	-1.15024	1.71242	1.413	-0.1702	0.914548	-1.36242	-0.791021	0.0563508	-0.0150372	1.37808	0.151613	-2.79653	-0.950106	-0.507404	0.266516	-1.2676	-0.275893	-0.043079	0.276992	-0.390084	-0.524254	0.304008	0.13293	0.748883	-0.208272	0.387368	2.60251	0.764659	1.04198
0	0	0	0	-5.5483	-0.24645	-0.449426	1.29719	-0.3845	0.305961	-0.22842	-1.04781	-1.12729	1.13738	-0.567431	-0.103257	0.944156	2.41043	-0.0535182	-0.308883	0.17733	-1.27486	-0.55353	0.0114045	0.0581822	-0.075982	-0.0235711	-0.101392	-0.341453	1.07037	-0.0693156	-0.234865	0.480669	-1.03163	0.630198	-1.41857	0.612343	-0.993629	0.115264	-0.798978
0	0	0	0	0	-5.37017	1.14997	0.688072	0.428594	0.445355	-0.177221	0.131988	0.884036	-0.21721	-0.226478	0.21202	-0.81493	1.59875	0.221207	-1.75692	2.16646	-1.45634	0.78309	-0.2786	0.616375	-0.926038	0.332636	-0.161508	-1.02049	1.95137	1.01586	-0.284575	0.508931	-0.577735	1.20419	1.17841	0.715171	-1.06654	0.401494	0.706527
0	0	0	0	0	0	-5.45759	-0.371493	-1.25988	0.393108	-0.112369	0.22777	-0.306853	0.488282	-1.22523	-0.137246	-0.907962	-0.837023	-0.318002	0.450274	-1.21839	0.447954	-2.06797	0.0572525	0.810089	-0.401094	0.399119	-0.335242	-1.99961	0.710915	-0.321413	-0.619804	1.46248	0.343636	2.09797	1.12574	-1.23872	0.252158	-1.25011	1.00475
0	0	0	0	0	0	0	5.83263	0.836833	-0.137906	-1.24384	0.631114	0.324068	1.58899	0.772785	-0.63726	-0.502263	-1.09592	-0.43517	-0.921288	0.295978	0.220883	0.0993884	-0.256319	0.629012	-0.706071	0.704627	-0.56975	-2.04826	-2.52583	-0.633646	-0.218802	-0.565351	-0.656343	1.67751	-0.772896	-0.172173	0.416771	1.05132	0.583196
0	0	0	0	0	0	0	0	-5.82559	0.450187	-1.7295	-1.05644	-0.247214	-0.258968	-1.21106	-0.215663	0.172942	1.33563	0.0309944	-0.686845	-0.232332	-1.09744	1.14816	-0.81764	1.28941	-2.79876	-0.192	-1.5853	0.495586	0.341874	1.05991	0.602122	-1.09462	0.856321	-0.355789	-0.915154	-0.918663	0.094822	-0.332533	-0.958288
0	0	0	0	0	0	0	0	0	-4.67424	-1.10519	-0.0555087	-0.191646	0.691062	-0.930133	-1.08746	1.10041	-1.10421	-1.27231	1.44591	0.628493	0.810449	-0.0132019	-0.734895	-0.752437	-1.47493	0.012094	-0.850413	1.27852	-0.85409	2.78692	0.663282	0.241925	-0.70453	-0.654051	0.825275	1.72892	0.390342	-0.335522	1.04243
0	0	0	0	0	0	0	0	0	0	3.50051	-0.448265	-1.2352	0.258285	1.29275	0.547067	-0.86312	-0.00829112	0.409069	-1.72917	-0.818253	0.279749	0.250475	0.189503	-0.0764455	0.936264	-0.494796	0.928068	-0.132652	1.40441	-0.704664	-1.66504	0.957369	-0.682821	1.16432	0.278328	-0.465655	0.269492	-0.475874	-0.18619
0	0	0	0	0	0	0	0	0	0	0	-5.01968	-1.70814	1.33818	0.154632	1.01984	0.361672	-2.00091	0.260236	-0.744601	0.322082	0.0968054	0.680111	0.0682167	-0.29222	1.56376	0.609258	-0.208147	-1.19461	-0.136411	1.67136	1.44326	1.91518	0.720984	-1.3781	-0.992541	0.0746913	0.240874	-0.466413	0.290174
0	0	0	0	0	0	0	0	0	0	0	0	3.53782	-0.0908808	0.390478	0.490782	0.00151891	-1.78387	-0.17136	0.598923	1.03411	0.869806	-0.186728	1.36006	0.0527143	0.997806	-0.532204	1.42333	-0.490672	-1.22153	0.501879	0.268051	-1.24531	-0.255612	-0.446327	0.706261	-0.112618	-0.299867	0.019725	0.0439603
0	0	0	0	0	0	0	0	0	0	0	0	0	-6.08969	0.837117	0.38338	-1.89759	0.211716	0.215982	0.417586	0.715193	-0.369694	1.11444	0.520926	-0.784114	0.494213	-0.0340919	-0.555546	0.205013	0.569922	-1.71874	0.448025	-1.61723	0.172794	-1.49323	-1.3176	1.78643	-0.735372	-0.640357	0.380277
0	0	0	0	0	0	0	0	0	0	0	0	0	0	4.9492	-0.549654	-0.168319	0.210697	-0.725006	1.07887	0.471799	0.422466	0.159597	-0.399718	0.223728	-0.661096	-0.121151	-0.236099	-0.70158	0.0473368	1.11392	-0.0780161	-1.0387	0.68875	-0.0943776	1.01145	-0.689018	0.190791	0.20557	0.114177
0	0	0	0	0	0	0	0	0	0	0	0	0	0	0	-6.19375	-1.05285	0.973577	-0.174649	2.59984	0.776763	-1.07926	-0.776728	2.03202	-1.22047	-0.699577	-1.15278	-1.04314	0.328774	1.22356	1.07291	-0.886267	-0.810504	0.0112924	0.257522	-0.224611	0.36924	-1.43006	-0.975649	1.59423
0	0	0	0	0	0	0	0	0	0	0	0	0	0	0	0	4.67358	-0.0345797	-1.26711	-0.754548	0.255321	0.887346	0.497687	0.808264	0.407173	1.37226	0.770936	-0.266896	-1.55364	-0.361037	-0.601873	0.258937	0.575308	-0.692993	0.694505	0.319955	0.589443	-0.857756	-0.922706	-1.7454
0	0	0	0	0	0	0	0	0	0	0	0	0	0	0	0	0	3.91916	-0.660786	1.10316	-1.66303	-1.60532	-0.703002	0.655661	0.97829	-0.69789	-0.357156	0.564086	0.403373	0.351756	-2.08325	-1.50459	1.17675	-0.374978	-2.41365	1.78092	1.26256	1.39506	-1.49122	-1.03522
0	0	0	0	0	0	0	0	0	0	0	0	0	0	0	0	0	0	3.86731	0.440648	0.493932	-0.749767	-0.345065	1.33247	-0.0560155	0.791295	-0.216377	-1.43886	-1.29969	-1.00166	-1.1908	-1.93145	1.61627	0.187414	-0.38958	-2.21901	-0.654257	-0.567169	-0.499998	0.176498
0	0	0	0	0	0	0	0	0	0	0	0	0	0	0	0	0	0	0	-3.65346	0.0157455	-0.750048	-0.984903	0.451846	-0.130632	-0.705528	-0.757025	-0.0402569	-0.54382	-0.921623	-1.96092	0.340708	0.534401	1.09237	1.88532	-2.06856	2.11162	-1.78373	0.195615	1.0975
0	0	0	0	0	0	0	0	0	0	0	0	0	0	0	0	0	0	0	0	3.47054	0.460968	-0.919823	0.428428	0.984349	-0.633351	0.481653	1.48566	-0.713203	-1.27332	1.33122	-1.18935	-0.330953	-0.571391	1.25162	2.33884	0.718977	-0.77917	-3.66006	-1.12794
0	0	0	0	0	0	0	0	0	0	0	0	0	0	0	0	0	0	0	0	0	3.17951	-1.56511	-1.77422	-0.822878	1.98083	0.0223084	-0.387499	-0.32722	1.42073	-0.693807	-1.4203	0.0605197	-1.70941	-0.418467	-0.573978	-0.923642	-1.29842	-0.775562	0.289111
0	0	0	0	0	0	0	0	0	0	0	0	0	0	0	0	0	0	0	0	0	0	3.71268	0.293048	-0.157165	-0.267447	0.813448	0.56327	-0.956789	0.775016	-0.525857	-0.748258	1.59159	1.00272	-0.575761	0.2265	0.523677	0.499772	1.01229	-0.477551
0	0	0	0	0	0	0	0	0	0	0	0	0	0	0	0	0	0	0	0	0	0	0	5.01302	-1.05069	1.33068	0.130512	1.48801	1.3717	-0.111417	-0.185696	-1.15955	0.835387	0.551852	-1.47949	-0.631006	0.472721	-0.0881596	1.12434	-0.720997
0	0	0	0	0	0	0	0	0	0	0	0	0	0	0	0	0	0	0	0	0	0	0	0	-3.35347	0.586039	-0.558053	0.280603	0.959846	-0.337372	0.579521	0.583233	-0.543389	-1.07908	0.273935	-1.30502	0.989916	-0.599394	0.753597	0.772855
0	0	0	0	0	0	0	0	0	0	0	0	0	0	0	0	0	0	0	0	0	0	0	0	0	3.32575	0.928432	3.26184	0.582529	-0.0993351	1.04773	-0.441155	0.297659	1.31226	0.813455	0.726066	-0.940745	0.543249	-0.100994	-0.187969
0	0	0	0	0	0	0	0	0	0	0	0	0	0	0	0	0	0	0	0	0	0	0	0	0	0	3.56727	0.680793	-0.539497	0.986704	0.617288	0.596101	2.08103	-0.472117	0.664235	-1.34123	1.90392	-0.898968	0.0868144	-0.754512
0	0	0	0	0	0	0	0	0	0	0	0	0	0	0	0	0	0	0	0	0	0	0	0	0	0	0	2.93248	-1.00097	-0.486264	1.74148	1.20352	1.55335	-0.117221	1.32227	-0.00341017	-0.928647	1.47129	0.904546	1.31692
0	0	0	0	0	0	0	0	0	0	0	0	0	0	0	0	0	0	0	0	0	0	0	0	0	0	0	0	2.91345	0.149254	-0.148372	0.0777379	-0.0369405	1.7772	-0.300278	1.996	-1.30992	0.0504561	-0.88456	-0.979843
0	0	0	0	0	0	0	0	0	0	0	0	0	0	0	0	0	0	0	0	0	0	0	0	0	0	0	0	0	-3.53159	0.701621	0.175423	-1.58709	0.587095	-0.78292	-1.40226	0.143027	0.484657	0.718776	0.4457
0	0	0	0	0	0	0	0	0	0	0	0	0	0	0	0	0	0	0	0	0	0	0	0	0	0	0	0	0	0	-2.92554	-0.810259	-0.38393	0.151556	-0.549051	0.335837	-0.655867	-2.35838	0.260554	-1.08395
0	0	0	0	0	0	0	0	0	0	0	0	0	0	0	0	0	0	0	0	0	0	0	0	0	0	0	0	0	0	0	-2.32738	0.849457	0.103408	0.851519	-0.44952	1.86324	-1.32294	0.723266	0.10985
0	0	0	0	0	0	0	0	0	0	0	0	0	0	0	0	0	0	0	0	0	0	0	0	0	0	0	0	0	0	0	0	2.77028	-1.69786	1.32836	-0.224879	1.97628	1.35999	1.65237	-0.432283
0	0	0	0	0	0	0	0	0	0	0	0	0	0	0	0	0	0	0	0	0	0	0	0	0	0	0	0	0	0	0	0	0	1.95573	2.05684	0.228166	1.21699	1.28571	1.51646	0.490897
0	0	0	0	0	0	0	0	0	0	0	0	0	0	0	0	0	0	0	0	0	0	0	0	0	0	0	0	0	0	0	0	0	0	-2.0479	-0.216339	-1.13243	-0.299922	-0.583678	1.22502
0	0	0	0	0	0	0	0	0	0	0	0	0	0	0	0	0	0	0	0	0	0	0	0	0	0	0	0	0	0	0	0	0	0	0	1.75133	1.18107	-0.0303816	-0.308897	0.952316
0	0	0	0	0	0	0	0	0	0	0	0	0	0	0	0	0	0	0	0	0	0	0	0	0	0	0	0	0	0	0	0	0	0	0	0	1.36698	-2.14871	0.498684	-0.601622
0	0	0	0	0	0	0	0	0	0	0	0	0	0	0	0	0	0	0	0	0	0	0	0	0	0	0	0	0	0	0	0	0	0	0	0	0	-1.7001	1.17543	0.555075
0	0	0	0	0	0	0	0	0	0	0	0	0	0	0	0	0	0	0	0	0	0	0	0	0	0	0	0	0	0	0	0	0	0	0	0	0	0	-1.34737	-1.77649
0	0	0	0	0	0	0	0	0	0	0	0	0	0	0	0	0	0	0	0	0	0	0	0	0	0	0	0	0	0	0	0	0	0	0	0	0	0	0	0.28217
5-dimensional	6.08201	-4.51692	-1.13565	0.108313	0.0577343
2	-4.51692	7.98142	0.248015	-0.233026	-0.11814
3	-1.13565	0.248015	0.841776	-0.201183	0.0880271
4	0.108313	-0.233026	-0.201183	0.309779	-0.00649274
5	0.0577343	-0.11814	0.0880271	-0.00649274	0.0584947
6-dimensional	4.82548	-1.5295	-0.840203	-1.87783	-0.800766	1.17887
2	-1.5295	5.04457	-0.803793	0.0718738	-0.383842	0.0880657
3	-0.840203	-0.803793	1.81339	1.31877	0.28913	-0.229328
4	-1.87783	0.0718738	1.31877	2.49268	0.140194	0.0299367
5	-0.800766	-0.383842	0.28913	0.140194	2.14335	-1.34219
6	1.17887	0.0880657	-0.229328	0.0299367	-1.34219	2.06213
7-dimensional	10.8313	-2.18752	-0.845251	-0.207777	-0.920924	-0.538025	-0.0503185
2	-2.18752	5.82391	0.316118	0.0844155	-0.885296	-0.289337	-0.024986
3	-0.845251	0.316118	4.11191	-0.494602	1.78097	0.669838	-0.0272993
4	-0.207777	0.0844155	-0.494602	2.88958	-0.996289	-0.983188	-0.0343702
5	-0.920924	-0.885296	1.78097	-0.996289	3.29984	1.54032	-0.0375242
6	-0.538025	-0.289337	0.669838	-0.983188	1.54032	1.18773	-0.00114785
7	-0.0503185	-0.024986	-0.0272993	-0.0343702	-0.0375242	-0.00114785	0.0715653
8-dimensional	4.01673	-0.296929	-0.0827684	0.0706974	0.457902	-0.38895	-0.0439193	0.0748266
2	-0.296929	7.45285	0.16216	-0.68445	-0.0448327	0.657237	0.0191823	0.0103745
3	-0.0827684	0.16216	2.35216	1.36627	0.330881	0.388305	0.0432227	-0.0202292
4	0.0706974	-0.68445	1.36627	4.13252	-0.155125	0.78157	0.0574331	-0.0770146
5	0.457902	-0.0448327	0.330881	-0.155125	0.974145	-0.120873	-0.103674	0.111715
6	-0.38895	0.657237	0.388305	0.78157	-0.120873	1.74865	0.0854601	-0.0869161
7	-0.0439193	0.0191823	0.0432227	0.0574331	-0.103674	0.0854601	0.0699187	-0.0199761
8	0.0748266	0.0103745	-0.0202292	-0.0770146	0.111715	-0.0869161	-0.0199761	0.0269492
9-dimensional	11.2219	-2.14703	-3.90977	-0.109108	-0.546206	-1.96096	-0.142065	-0.132127	-0.00350469
2	-2.14703	22.2299	4.04358	-3.66185	0.339762	1.6938	0.0721193	0.0141485	0.0214011
3	-3.90977	4.04358	7.4025	-0.886661	1.03465	2.4909	0.32433	0.252264	-0.00431514
4	-0.109108	-3.66185	-0.886661	3.97745	0.35485	0.94008	-0.0987591	-0.0392985	-0.00133709
5	-0.546206	0.339762	1.03465	0.35485	1.95114	1.46625	0.0519541	-0.0334259	0.0035891
6	-1.96096	1.6938	2.4909	0.94008	1.46625	4.6121	-0.105874	-0.0517971	-0.00198577
7	-0.142065	0.0721193	0.32433	-0.0987591	0.0519541	-0.105874	0.384307	0.261252	-0.00526534
8	-0.132127	0.0141485	0.252264	-0.0392985	-0.0334259	-0.0517971	0.261252	0.331775	-0.0119673
9	-0.00350469	0.0214011	-0.00431514	-0.00133709	0.0035891	-0.00198577	-0.00526534	-0.0119673	0.00436522
10-dimensional	9.9603	2.51068	-0.631702	-0.612865	-0.331638	0.424332	0.0161091	0.156381	0.128228	-0.0730811
2	2.51068	8.65618	0.39333	0.210073	0.21337	-0.443641	0.0450253	0.155382	-0.0156895	0.0139229
3	-0.631702	0.39333	5.3005	0.462	-0.186953	-0.435327	0.083511	-1.12787	0.128603	-0.0841342
4	-0.612865	0.210073	0.462	1.29985	0.00201393	0.0975949	-0.0513846	-0.150773	-0.0465467	0.00856179
5	-0.331638	0.21337	-0.186953	0.00201393	0.969736	-0.338335	0.0986054	0.337029	-0.121153	0.109964
6	0.424332	-0.443641	-0.435327	0.0975949	-0.338335	1.13246	0.0642348	0.0651031	-0.13586	0.0132411
7	0.0161091	0.0450253	0.083511	-0.0513846	0.0986054	0.0642348	0.153404	-0.108209	-0.0340438	0.0489905
8	0.156381	0.155382	-1.12787	-0.150773	0.337029	0.0651031	-0.108209	1.44693	-0.0346153	0.0151697
9	0.128228	-0.0156895	0.128603	-0.0465467	-0.121153	-0.13586	-0.0340438	-0.0346153	0.207995	-0.0833919
10	-0.0730811	0.0139229	-0.0841342	0.00856179	0.109964	0.0132411	0.0489905	0.0151697	-0.0833919	0.0555371
11-dimensional	5.83064	-1.29782	-0.596728	1.03209	-0.192731	1.80356	1.41512	0.0971307	-0.0852688	0.0515551	0.552957
2	-1.29782	7.32647	-0.0615379	0.0601186	0.571541	0.950587	0.53448	0.0201868	-0.14215	0.00752662	0.277017
3	-0.596728	-0.0615379	3.19812	-1.64487	0.0752289	-0.11429	0.523603	-0.339956	0.209024	0.0622536	0.11938
4	1.03209	0.0601186	-1.64487	5.57238	0.344266	1.49387	-0.292234	1.27688	0.136358	-0.00694694	-0.244514
5	-0.192731	0.571541	0.0752289	0.344266	1.64041	-0.290294	0.15229	0.201596	-0.0255261	-0.00173314	0.0537721
6	1.80356	0.950587	-0.11429	1.49387	-0.290294	4.68657	2.00716	0.0649353	-0.0352577	0.0969662	0.877047
7	1.41512	0.53448	0.523603	-0.292234	0.15229	2.00716	3.08969	-0.122271	0.0749356	0.161832	1.11374
8	0.0971307	0.0201868	-0.339956	1.27688	0.201596	0.0649353	-0.122271	0.539359	0.0876025	8.75621e-05	-0.128587
9	-0.0852688	-0.14215	0.209024	0.136358	-0.0255261	-0.0352577	0.0749356	0.0876025	0.322127	0.0523912	-0.0241718
10	0.0515551	0.00752662	0.0622536	-0.00694694	-0.00173314	0.0969662	0.161832	8.75621e-05	0.0523912	0.0170929	0.0548059
11	0.552957	0.277017	0.11938	-0.244514	0.0537721	0.877047	1.11374	-0.128587	-0.0241718	0.0548059	0.508352
12-dimensional	12.2407	1.59634	-2.56035	-0.199911	-0.796877	-3.03957	-0.10607	1.07021	0.00189835	0.258522	0.636835	0.183485
2	1.59634	6.39754	0.348236	0.322801	3.12855	1.81422	1.1031	2.77792	-0.351354	0.345382	-0.187546	0.893517
3	-2.56035	0.348236	9.42639	-0.959171	0.925029	3.76241	-0.768891	0.439146	1.01063	0.973542	3.39193	0.529706
4	-0.199911	0.322801	-0.959171	9.03681	0.729876	-2.84672	1.48706	0.533418	-1.47686	-1.44739	-5.0898	-0.184543
5	-0.796877	3.12855	0.925029	0.729876	7.01955	2.90856	1.86657	3.49663	-0.81678	-0.0018346	-1.69587	1.02812
6	-3.03957	1.81422	3.76241	-2.84672	2.90856	10.344	0.142291	2.02227	0.235752	0.660092	1.60218	0.793778
7	-0.10607	1.1031	-0.768891	1.48706	1.86657	0.142291	1.29455	1.07115	-0.695189	-0.258618	-1.85416	0.189205
8	1.07021	2.77792	0.439146	0.533418	3.49663	2.02227	1.07115	4.80049	-0.16031	0.656272	0.526926	1.47258
9	0.00189835	-0.351354	1.01063	-1.47686	-0.81678	0.235752	-0.695189	-0.16031	0.808744	0.549166	2.03374	0.114225
10	0.258522	0.345382	0.973542	-1.44739	-0.0018346	0.660092	-0.258618	0.656272	0.549166	0.688777	1.91518	0.321024
11	0.636835	-0.187546	3.39193	-5.0898	-1.69587	1.60218	-1.85416	0.526926	2.03374	1.91518	6.72713	0.632093
12	0.183485	0.893517	0.529706	-0.184543	1.02812	0.793778	0.189205	1.47258	0.114225	0.321024	0.632093	0.51197
13-dimensional	17.5073	1.57574	-0.13602	0.122826	-0.160033	-1.52333	-0.549202	0.506436	0.134893	-0.208655	-0.39002	-0.279475	-0.00732814
2	1.57574	9.89007	2.26904	-1.39205	-1.23628	-0.636482	3.2392	0.830991	-0.280542	0.70538	0.383658	1.0735	0.0579781
3	-0.13602	2.26904	6.80706	-1.63151	-1.14092	4.73535	-1.22013	-0.113291	0.307126	-0.34193	-0.276433	-0.402998	-0.0278265
4	0.122826	-1.39205	-1.63151	5.59542	1.12249	2.51809	-0.957407	0.42096	-0.210725	0.0760053	-1.65472	0.400413	-0.181225
5	-0.160033	-1.23628	-1.14092	1.12249	3.96019	0.636505	-1.26427	-0.163873	0.359637	-0.618061	1.71719	-1.33952	0.137151
6	-1.52333	-0.636482	4.73535	2.51809	0.636505	11.3875	-1.57637	0.121262	0.202913	-0.470068	-1.08933	-0.385593	-0.0640448
7	-0.549202	3.2392	-1.22013	-0.957407	-1.26427	-1.57637	4.18405	0.999473	-0.358979	1.04055	0.0328267	1.62089	0.0374008
8	0.506436	0.830991	-0.113291	0.42096	-0.163873	0.121262	0.999473	1.82959	-0.568923	0.0939719	-0.70277	0.788131	-0.138132
9	0.134893	-0.280542	0.307126	-0.210725	0.359637	0.202913	-0.358979	-0.568923	1.91473	0.047268	-0.13379	-0.9067	0.210824
10	-0.208655	0.70538	-0.34193	0.0760053	-0.618061	-0.470068	1.04055	0.0939719	0.047268	0.691746	-0.844333	0.723299	-0.0332954
11	-0.39002	0.383658	-0.276433	-1.65472	1.71719	-1.08933	0.0328267	-0.70277	-0.13379	-0.844333	3.97318	-1.4443	0.26731
12	-0.279475	1.0735	-0.402998	0.400413	-1.33952	-0.385593	1.62089	0.788131	-0.9067	0.723299	-1.4443	1.61738	-0.198878
13	-0.00732814	0.0579781	-0.0278265	-0.181225	0.137151	-0.0640448	0.0374008	-0.138132	0.210824	-0.0332954	0.26731	-0.198878	0.0511632
14-dimensional	18.8892	-1.10617	0.742938	-0.00195197	1.57652	2.51028	0.616558	3.00345	1.46849	-3.1856	2.16093	0.126833	-0.0917247	-0.00235087
2	-1.10617	20.4048	0.318913	0.7292	-3.09839	-2.30958	-0.565008	0.133231	-2.34046	1.2425	0.621227	1.15067	-2.06759	-1.20316
3	0.742938	0.318913	9.99472	-1.13313	3.10984	-1.47194	0.572149	2.0247	0.782043	-1.78705	2.33407	0.136305	-0.471636	-0.263761
4	-0.00195197	0.7292	-1.13313	5.28402	1.35076	-0.782402	-0.124873	1.01347	-0.0298944	0.268599	0.0237016	-0.0251574	-0.00667526	-0.00812062
5	1.57652	-3.09839	3.10984	1.35076	8.86966	-1.26841	0.004785	1.73085	1.10086	-1.93449	-1.30269	0.185482	1.69133	1.02506
6	2.51028	-2.30958	-1.47194	-0.782402	-1.26841	8.26754	-0.304422	1.29991	0.783997	-3.41953	-0.903441	0.940155	2.08193	1.199
7	0.616558	-0.565008	0.572149	-0.124873	0.004785	-0.304422	0.694347	-0.240894	0.469936	0.28172	1.00982	-0.373577	-0.38641	-0.234286
8	3.00345	0.133231	2.0247	1.01347	1.73085	1.29991	-0.240894	5.66979	-0.252156	-3.12146	0.0716336	1.23539	-0.526058	-0.182398
9	1.46849	-2.34046	0.782043	-0.0298944	1.10086	0.783997	0.469936	-0.252156	1.99551	-0.348539	1.11721	-1.10041	0.90428	0.474167
10	-3.1856	1.2425	-1.78705	0.268599	-1.93449	-3.41953	0.28172	-3.12146	-0.348539	4.50816	0.344209	-1.3042	-1.0844	-0.682388
11	2.16093	0.621227	2.33407	0.0237016	-1.30269	-0.903441	1.00982	0.0716336	1.11721	0.344209	6.68159	-0.661995	-2.51562	-1.57118
12	0.126833	1.15067	0.136305	-0.0251574	0.185482	0.940155	-0.373577	1.23539	-1.10041	-1.3042	-0.661995	1.31467	-0.21423	-0.0801706
13	-0.0917247	-2.06759	-0.471636	-0.00667526	1.69133	2.08193	-0.38641	-0.526058	0.90428	-1.0844	-2.51562	-0.21423	2.58065	1.47721
14	-0.00235087	-1.20316	-0.263761	-0.00812062	1.02506	1.199	-0.234286	-0.182398	0.474167	-0.682388	-1.57118	-0.0801706	1.47721	0.853159
15-dimensional	16.257	4.08651	3.65313	4.0626	-0.962417	-1.55979	-1.47996	-0.568287	-1.27405	0.89443	1.6662	1.34787	-0.218957	0.57289	0.00120681
2	4.08651	16.4717	3.58767	-1.25922	-0.340411	-0.966655	-0.816255	-1.05055	-0.438773	0.266934	-0.828346	0.13642	0.11908	0.317932	-0.00018527
3	3.65313	3.58767	9.81062	1.17297	-3.2536	1.08136	0.173547	1.67187	-0.366887	2.35624	1.40116	1.3901	0.675851	0.303437	0.00170727
4	4.0626	-1.25922	1.17297	15.9146	1.08037	-0.78792	-2.50102	-0.824884	-1.6158	-0.294997	3.10182	1.51495	-0.602471	0.917022	0.000695403
5	-0.962417	-0.340411	-3.2536	1.08037	5.47553	-0.609096	-0.782098	-0.913536	-0.351082	-1.92738	-1.3027	-0.833915	-1.10757	-0.14802	0.00079066
6	-1.55979	-0.966655	1.08136	-0.78792	-0.609096	5.91144	1.65741	0.91203	0.688432	1.64306	1.39259	0.594562	0.744671	-0.286329	-0.00323178
7	-1.47996	-0.816255	0.173547	-2.50102	-0.782098	1.65741	3.0149	0.709331	1.44101	1.50413	-0.796196	-0.556859	0.829963	-0.742201	-0.000537804
8	-0.568287	-1.05055	1.67187	-0.824884	-0.913536	0.91203	0.709331	3.23055	-0.662734	0.820822	-0.314706	0.412083	-0.0686432	-0.287521	-0.00139918
9	-1.27405	-0.438773	-0.366887	-1.6158	-0.351082	0.688432	1.44101	-0.662734	1.8069	0.329907	-0.224905	-0.673386	0.858988	-0.135958	0.000374692
10	0.89443	0.266934	2.35624	-0.294997	-1.92738	1.64306	1.50413	0.820822	0.329907	2.92577	0.143312	0.827245	1.04348	-0.233176	0.000342874
11	1.6662	-0.828346	1.40116	3.10182	-1.3027	1.39259	-0.796196	-0.314706	-0.224905	0.143312	5.41859	1.39117	0.213161	0.843664	-0.00102155
12	1.34787	0.13642	1.3901	1.51495	-0.833915	0.594562	-0.556859	0.412083	-0.673386	0.827245	1.39117	1.00986	0.0290733	0.255236	-0.000350523
13	-0.218957	0.11908	0.675851	-0.602471	-1.10757	0.744671	0.829963	-0.0686432	0.858988	1.04348	0.213161	0.0290733	1.00867	0.0912919	0.000919798
14	0.57289	0.317932	0.303437	0.917022	-0.14802	-0.286329	-0.742201	-0.287521	-0.135958	-0.233176	0.843664	0.255236	0.0912919	0.42205	0.00128605
15	0.00120681	-0.00018527	0.00170727	0.000695403	0.00079066	-0.00323178	-0.000537804	-0.00139918	0.000374692	0.000342874	-0.00102155	-0.000350523	0.000919798	0.00128605	7.99961e-05
16-dimensional	12.6797	0.941342	5.26705	0.705994	0.668316	1.24687	0.585217	1.88487	-0.508548	-1.97614	-0.368241	-0.331993	0.850336	0.449695	0.421615	-0.850021
2	0.941342	21.4981	-1.36751	-0.545242	-3.13022	3.81315	1.89388	1.66575	3.40826	4.20678	-3.52699	0.775385	1.37729	-3.09034	0.00719768	0.0296825
3	5.26705	-1.36751	11.0247	0.265729	-0.394035	1.69642	0.371809	0.98521	-1.1994	-2.56159	1.86214	0.315219	-0.0202306	0.76057	0.405671	-0.710518
4	0.705994	-0.545242	0.265729	11.2707	1.30336	2.10666	-0.219056	-0.289503	0.505238	1.51743	-0.470883	0.671126	0.534785	-0.0615391	-0.462199	0.850641
5	0.668316	-3.13022	-0.394035	1.30336	9.11212	0.570574	-1.26901	-0.257243	-3.25845	-0.177675	-0.192439	2.01619	0.113703	3.81612	-0.224355	0.298661
6	1.24687	3.81315	1.69642	2.10666	0.570574	9.49921	1.30273	0.124929	0.773759	1.40779	-3.89902	-0.398268	0.288222	-0.700965	0.862783	-1.59061
7	0.585217	1.89388	0.371809	-0.219056	-1.26901	1.30273	1.77733	1.28979	0.863117	0.223886	-0.356926	0.932104	0.422669	-0.840254	0.439133	-0.841102
8	1.88487	1.66575	0.98521	-0.289503	-0.257243	0.124929	1.28979	4.96626	0.525106	-0.864354	-0.112112	1.03549	1.35636	-0.746163	0.389742	-0.670855
9	-0.508548	3.40826	-1.1994	0.505238	-3.25845	0.773759	0.863117	0.525106	3.60736	1.69326	-2.4504	-2.31851	0.212723	-2.44173	-0.00853573	-0.0315557
10	-1.97614	4.20678	-2.56159	1.51743	-0.177675	1.40779	0.223886	-0.864354	1.69326	3.23163	-2.63698	-0.22503	0.178621	-0.923521	-0.143081	0.376319
11	-0.368241	-3.52699	1.86214	-0.470883	-0.192439	-3.89902	-0.356926	-0.112112	-2.4504	-2.63698	6.73568	3.05581	-0.583763	1.37138	-0.452157	0.87459
12	-0.331993	0.775385	0.315219	0.671126	2.01619	-0.398268	0.932104	1.03549	-2.31851	-0.22503	3.05581	5.24541	0.609068	1.62629	-0.0413941	-0.00607547
13	0.850336	1.37729	-0.0202306	0.534785	0.113703	0.288222	0.422669	1.35636	0.212723	0.178621	-0.583763	0.609068	0.778125	-0.211214	0.0255006	-0.0976027
14	0.449695	-3.09034	0.76057	-0.0615391	3.81612	-0.700965	-0.840254	-0.746163	-2.44173	-0.923521	1.37138	1.62629	-0.211214	2.5896	-0.0778902	0.221376
15	0.421615	0.00719768	0.405671	-0.462199	-0.224355	0.862783	0.439133	0.389742	-0.00853573	-0.143081	-0.452157	-0.0413941	0.0255006	-0.0778902	0.46514	-0.600498
16	-0.850021	0.0296825	-0.710518	0.850641	0.298661	-1.59061	-0.841102	-0.670855	-0.0315557	0.376319	0.87459	-0.00607547	-0.0976027	0.221376	-0.600498	1.03499
17-dimensional	18.7401	1.3018	-0.441475	2.00521	1.22256	-0.292452	2.17943	3.41048	2.63982	0.295088	3.02854	-1.80988	1.41363	-2.32303	-0.0180292	0.17536	0.00736972
2	1.3018	15.469	5.85756	-3.7058	0.784443	1.21099	-0.766809	0.803519	-0.113532	0.121261	-0.656034	0.437184	0.430153	-1.3784	0.0171027	-0.904796	-0.120717
3	-0.441475	5.85756	11.4466	-0.80123	0.191415	1.20516	-1.2832	3.91372	-1.04888	0.866191	-2.84694	-2.36219	0.581992	-1.89061	0.525276	-1.78379	-0.112969
4	2.00521	-3.7058	-0.80123	12.0366	-2.09027	1.91219	3.48686	2.18886	2.93218	-0.527583	2.26371	-1.83472	-0.28937	0.663447	0.629049	-1.06239	0.00247452
5	1.22256	0.784443	0.191415	-2.09027	3.65324	-0.312852	-0.618963	2.38283	0.403774	0.686069	0.168324	1.319	0.37263	-1.84583	-0.404596	0.0756012	-0.073979
6	-0.292452	1.21099	1.20516	1.91219	-0.312852	11.2782	0.10776	0.983565	-0.838459	-0.0221532	0.244521	0.0644767	1.00978	-0.0191753	0.578841	-0.494831	0.066196
7	2.17943	-0.766809	-1.2832	3.48686	-0.618963	0.10776	4.85742	1.43566	4.24186	-1.46984	4.50241	0.895067	-0.885502	2.02064	-0.0903401	0.142081	-0.0178712
8	3.41048	0.803519	3.91372	2.18886	2.38283	0.983565	1.43566	11.9922	3.47828	2.13128	0.941907	-1.01355	0.216814	-4.01951	-0.355563	-0.606961	-0.156392
9	2.63982	-0.113532	-1.04888	2.93218	0.403774	-0.838459	4.24186	3.47828	7.17411	0.51971	5.29672	-0.0569292	-0.328223	-1.82278	-0.525387	-0.0838196	-0.107883
10	0.295088	0.121261	0.866191	-0.527583	0.686069	-0.0221532	-1.46984	2.13128	0.51971	4.23454	-0.536958	-2.40405	1.29384	-4.22039	0.103732	0.136864	0.0292094
11	3.02854	-0.656034	-2.84694	2.26371	0.168324	0.244521	4.50241	0.941907	5.29672	-0.536958	6.54897	1.34055	0.22737	-0.0530997	-0.59787	1.26789	0.0488638
12	-1.80988	0.437184	-2.36219	-1.83472	1.319	0.0644767	0.895067	-1.01355	-0.0569292	-2.40405	1.34055	7.08552	-1.99146	4.17551	-0.740449	0.613877	-0.071954
13	1.41363	0.430153	0.581992	-0.28937	0.37263	1.00978	-0.885502	0.216814	-0.328223	1.29384	0.22737	-1.99146	1.92014	-2.9464	0.197591	0.388306	0.0813538
14	-2.32303	-1.3784	-1.89061	0.663447	-1.84583	-0.0191753	2.02064	-4.01951	-1.82278	-4.22039	-0.0530997	4.17551	-2.9464	8.28605	0.0878085	0.0801784	0.0298298
15	-0.0180292	0.0171027	0.525276	0.629049	-0.404596	0.578841	-0.0903401	-0.355563	-0.525387	0.103732	-0.59787	-0.740449	0.197591	0.0878085	0.410363	-0.337976	0.0252531
16	0.17536	-0.904796	-1.78379	-1.06239	0.0756012	-0.494831	0.142081	-0.606961	-0.0838196	0.136864	1.26789	0.613877	0.388306	0.0801784	-0.337976	1.38566	0.103983
17	0.00736972	-0.120717	-0.112969	0.00247452	-0.073979	0.066196	-0.0178712	-0.156392	-0.107883	0.0292094	0.0488638	-0.071954	0.0813538	0.0298298	0.0252531	0.103983	0.018405
18-dimensional	33.7246	-2.13247	1.38116	3.25608	1.02381	1.61173	1.44957	0.689459	2.18591	1.18351	-4.40561	-0.176169	2.65895	-4.93111	-2.25475	-0.807104	-2.17832	-0.782153
2	-2.13247	19.8212	-1.46759	3.90022	2.44934	0.144252	1.67785	0.267382	-0.496394	-1.25211	0.616823	-2.98072	-1.62442	-3.26533	-0.268126	0.888542	0.181269	-0.118826
3	1.38116	-1.46759	10.5228	-3.34705	0.637726	-2.80183	-0.151654	0.802001	-0.0224882	1.79626	-1.7687	2.75763	0.945086	-1.11765	-0.600019	0.0803597	-0.616666	-0.253839
4	3.25608	3.90022	-3.34705	10.3939	-0.561387	4.76272	1.08263	-2.78831	-0.120283	-1.02058	-1.16021	-1.79639	0.251778	-2.43615	-0.0222191	-0.878567	-0.213361	0.0747165
5	1.02381	2.44934	0.637726	-0.561387	12.0607	-9.06373	0.508015	-0.0355782	-0.121396	-1.10809	0.981001	-1.71414	-0.398492	-1.37729	0.574087	0.279165	0.571954	0.200024
6	1.61173	0.144252	-2.80183	4.76272	-9.06373	15.6138	0.967929	-3.04665	0.273214	-0.887858	0.72967	-0.128558	1.7908	-2.98323	-1.62257	-0.461161	-0.60162	-0.330074
7	1.44957	1.67785	-0.151654	1.08263	0.508015	0.967929	2.2903	-0.13265	0.0509401	-1.45965	-1.31699	-0.657449	0.449846	-2.38447	-1.50316	0.452606	-0.106787	-0.31341
8	0.689459	0.267382	0.802001	-2.78831	-0.0355782	-3.04665	-0.13265	8.91913	-0.329502	-0.937891	-0.503459	-1.87109	-3.50804	0.962291	-0.694606	1.50684	-0.06128	-0.333453
9	2.18591	-0.496394	-0.0224882	-0.120283	-0.121396	0.273214	0.0509401	-0.329502	2.88611	-0.861476	0.671935	-2.26778	2.94533	0.970764	-0.101169	-0.744773	-0.456407	-0.028947
10	1.18351	-1.25211	1.79626	-1.02058	-1.10809	-0.887858	-1.45965	-0.937891	-0.861476	6.26082	-1.54669	5.21186	-1.78094	-0.64668	0.835594	-0.107895	-0.726828	-0.0538079
11	-4.40561	0.616823	-1.7687	-1.16021	0.981001	0.72967	-1.31699	-0.503459	0.671935	-1.54669	8.17327	-3.64537	-1.76547	1.58492	0.813901	0.882977	0.838251	0.220277
12	-0.176169	-2.98072	2.75763	-1.79639	-1.71414	-0.128558	-0.657449	-1.87109	-2.26778	5.21186	-3.64537	10.0166	1.4095	-3.22872	-1.0218	-0.185706	-0.66468	-0.299886
13	2.65895	-1.62442	0.945086	0.251778	-0.398492	1.7908	0.449846	-3.50804	2.94533	-1.78094	-1.76547	1.4095	11.0402	-1.19329	-0.694833	-2.1072	-0.208473	0.115479
14	-4.93111	-3.26533	-1.11765	-2.43615	-1.37729	-2.98323	-2.38447	0.962291	0.970764	-0.64668	1.58492	-3.22872	-1.19329	8.11749	3.31116	-0.862688	0.955752	0.86559
15	-2.25475	-0.268126	-0.600019	-0.0222191	0.574087	-1.62257	-1.50316	-0.694606	-0.101169	0.835594	0.813901	-1.0218	-0.694833	3.31116	2.93717	-0.570841	0.79712	0.712659
16	-0.807104	0.888542	0.0803597	-0.878567	0.279165	-0.461161	0.452606	1.50684	-0.744773	-0.107895	0.882977	-0.185706	-2.1072	-0.862688	-0.570841	1.10706	0.198472	-0.186904
17	-2.17832	0.181269	-0.616666	-0.213361	0.571954	-0.60162	-0.106787	-0.06128	-0.456407	-0.726828	0.838251	-0.66468	-0.208473	0.955752	0.79712	0.198472	0.763887	0.286014
18	-0.782153	-0.118826	-0.253839	0.0747165	0.200024	-0.330074	-0.31341	-0.333453	-0.028947	-0.0538079	0.220277	-0.299886	0.115479	0.86559	0.712659	-0.186904	0.286014	0.20458
19-dimensional	20.0227	-2.23302	1.09935	2.64148	-1.03832	1.44685	1.20961	1.5066	-0.601094	0.313972	-0.578783	-1.78676	-0.516859	-0.892001	-0.225026	-0.818248	0.704065	0.0559504	-0.0573325
2	-2.23302	12.7373	2.929	-0.165449	3.27935	-3.77991	-0.94524	0.376154	-4.14204	-4.74962	7.18725	3.64574	0.658223	3.81522	1.37214	0.563272	-0.49729	0.380936	0.196298
3	1.09935	2.929	20.9482	-3.56344	4.59759	-3.51715	-0.34291	-4.56424	-0.739754	0.255373	5.55769	3.15235	1.54167	1.23572	-3.70769	1.74621	0.0904281	2.31689	0.0405446
4	2.64148	-0.165449	-3.56344	18.7439	4.53853	4.04526	-0.184368	-0.0190376	3.33552	1.02571	-3.55974	-0.571352	0.754731	0.80734	3.58814	1.09558	-1.56712	0.435985	0.440322
5	-1.03832	3.27935	4.59759	4.53853	16.6762	-5.39577	2.09914	3.74257	1.38816	0.00044138	-5.17831	3.84303	0.137347	7.14973	-1.35405	1.43581	-0.179122	2.32373	0.238357
6	1.44685	-3.77991	-3.51715	4.04526	-5.39577	20.8269	0.52738	0.931207	-0.178046	-1.35452	2.21308	-3.18164	-0.607603	-1.95326	2.22381	-0.947251	0.106126	-0.960765	0.0418546
7	1.20961	-0.94524	-0.34291	-0.184368	2.09914	0.52738	5.28549	1.91725	-0.960215	-0.394197	0.870181	-0.952502	-0.995847	3.67451	-1.95998	-0.121283	1.13621	0.432533	-0.164954
8	1.5066	0.376154	-4.56424	-0.0190376	3.74257	0.931207	1.91725	10.8267	0.138762	-1.8251	-5.50953	1.50469	-0.0404094	4.24392	0.541394	-0.82144	-0.314007	-0.741823	-0.0542707
9	-0.601094	-4.14204	-0.739754	3.33552	1.38816	-0.178046	-0.960215	0.138762	7.12998	3.10749	-7.62835	-0.960921	1.1226	-2.69941	0.522155	0.424062	-0.786133	0.118253	0.105638
10	0.313972	-4.74962	0.255373	1.02571	0.00044138	-1.35452	-0.394197	-1.8251	3.10749	5.63103	-5.0959	-1.63995	-0.0132665	-3.75685	-1.41318	0.423601	0.198376	0.599684	-0.0376776
11	-0.578783	7.18725	5.55769	-3.55974	-5.17831	2.21308	0.870181	-5.50953	-7.62835	-5.0959	19.7506	-1.46291	-0.549046	-0.428029	1.13868	0.303617	0.752821	0.172943	0.0931007
12	-1.78676	3.64574	3.15235	-0.571352	3.84303	-3.18164	-0.952502	1.50469	-0.960921	-1.63995	-1.46291	5.72382	0.968597	5.22092	-1.83722	0.770753	-0.306317	0.358245	-0.0770533
13	-0.516859	0.658223	1.54167	0.754731	0.137347	-0.607603	-0.995847	-0.0404094	1.1226	-0.0132665	-0.549046	0.968597	1.32747	-0.109426	0.319879	0.295059	-0.756899	0.0404486	0.0662851
14	-0.892001	3.81522	1.23572	0.80734	7.14973	-1.95326	3.67451	4.24392	-2.69941	-3.75685	-0.428029	5.22092	-0.109426	12.5172	-1.78628	0.777767	-0.276908	0.186013	-0.0896758
15	-0.225026	1.37214	-3.70769	3.58814	-1.35405	2.22381	-1.95998	0.541394	0.522155	-1.41318	1.13868	-1.83722	0.319879	-1.78628	5.93287	0.0936707	-1.84538	-1.11767	0.415401
16	-0.818248	0.563272	1.74621	1.09558	1.43581	-0.947251	-0.121283	-0.82144	0.424062	0.423601	0.303617	0.770753	0.295059	0.777767	0.0936707	0.729431	-0.401813	0.329852	0.0824853
17	0.704065	-0.49729	0.0904281	-1.56712	-0.179122	0.106126	1.13621	-0.314007	-0.786133	0.198376	0.752821	-0.306317	-0.756899	-0.276908	-1.84538	-0.401813	1.3228	0.357402	-0.168608
18	0.0559504	0.380936	2.31689	0.435985	2.32373	-0.960765	0.432533	-0.741823	0.118253	0.599684	0.172943	0.358245	0.0404486	0.186013	-1.11767	0.329852	0.357402	0.866116	0.0152005
19	-0.0573325	0.196298	0.0405446	0.440322	0.238357	0.0418546	-0.164954	-0.0542707	0.105638	-0.0376776	0.0931007	-0.0770533	0.0662851	-0.0896758	0.415401	0.0824853	-0.168608	0.0152005	0.0453848
20-dimensional	22.3824	-3.30232	2.49283	1.29223	-3.17903	-2.88179	1.06856	-1.22049	-3.12969	0.911907	-3.00472	1.28582	-1.99534	0.750654	1.12685	0.178935	-0.879233	-0.852209	-2.76891	-0.00573947
2	-3.30232	26.8604	-1.02363	7.00924	1.69092	-3.23958	1.30849	1.9752	0.895163	2.11771	5.46982	1.87445	4.55261	-3.37299	0.812833	0.979734	1.1143	-0.826221	-0.281775	-0.0594554
3	2.49283	-1.02363	10.2233	-2.45774	-4.22781	-2.71802	1.19053	1.48648	-2.39073	2.88721	-2.21206	-0.631777	-0.921503	1.37533	0.53001	-0.886602	1.90478	-2.47862	-1.96281	0.0280862
4	1.29223	7.00924	-2.45774	20.8285	1.01234	1.66622	2.8841	2.84458	0.509671	2.57566	3.33648	1.0865	3.99489	-3.27885	-0.294462	-2.14401	1.70749	-2.6403	-2.62686	0.0523161
5	-3.17903	1.69092	-4.22781	1.01234	11.6556	0.707269	-0.652588	-0.671439	3.09302	-5.19403	0.854629	1.03535	2.32873	-2.51533	-0.801803	0.391617	-2.93737	3.72821	2.45156	-0.0798453
6	-2.88179	-3.23958	-2.71802	1.66622	0.707269	15.8951	-0.0917628	2.1204	1.93486	-1.46683	2.74846	-2.20805	3.43397	-2.06148	-0.897876	-0.322497	0.223864	0.505082	1.31001	0.0299575
7	1.06856	1.30849	1.19053	2.8841	-0.652588	-0.0917628	2.40434	1.76296	-0.683484	0.184288	-0.763519	0.840487	1.31014	-0.840594	0.254021	-0.590739	0.681334	-1.30737	-1.39312	0.0233411
8	-1.22049	1.9752	1.48648	2.84458	-0.671439	2.1204	1.76296	11.5775	-1.07566	-3.52403	-2.13542	-1.25736	4.90091	-3.36025	0.132225	0.840843	2.05241	-1.51124	0.410996	0.0509215
9	-3.12969	0.895163	-2.39073	0.509671	3.09302	1.93486	-0.683484	-1.07566	2.92247	-1.43765	2.07884	0.590373	0.299921	-0.451687	-1.17315	-0.28319	-0.498534	1.18471	1.54402	0.023678
10	0.911907	2.11771	2.88721	2.57566	-5.19403	-1.46683	0.184288	-3.52403	-1.43765	9.55895	2.92196	0.61313	-2.81034	2.78408	0.322976	-1.27884	2.28568	-2.82223	-2.25141	0.0307469
11	-3.00472	5.46982	-2.21206	3.33648	0.854629	2.74846	-0.763519	-2.13542	2.07884	2.92196	6.50423	-0.102501	1.35679	-0.861305	-0.667877	0.379186	0.0188664	-0.0605515	0.379227	0.0851045
12	1.28582	1.87445	-0.631777	1.0865	1.03535	-2.20805	0.840487	-1.25736	0.590373	0.61313	-0.102501	3.74164	-0.903544	0.759212	0.349225	-0.210766	-0.188739	-0.308104	-0.53487	0.0130584
13	-1.99534	4.55261	-0.921503	3.99489	2.32873	3.43397	1.31014	4.90091	0.299921	-2.81034	1.35679	-0.903544	7.36333	-4.51988	0.582027	1.43516	-0.239911	0.202828	0.426495	0.0139067
14	0.750654	-3.37299	1.37533	-3.27885	-2.51533	-2.06148	-0.840594	-3.36025	-0.451687	2.78408	-0.861305	0.759212	-4.51988	4.86236	0.509842	0.403387	0.0209925	-0.550083	-0.337169	0.0444397
15	1.12685	0.812833	0.53001	-0.294462	-0.801803	-0.897876	0.254021	0.132225	-1.17315	0.322976	-0.667877	0.349225	0.582027	0.509842	1.64792	1.11396	-0.472581	-0.0180973	-0.579711	-0.062571
16	0.178935	0.979734	-0.886602	-2.14401	0.391617	-0.322497	-0.590739	0.840843	-0.28319	-1.27884	0.379186	-0.210766	1.43516	0.403387	1.11396	2.80012	-1.28726	0.785715	0.770717	0.0432839
17	-0.879233	1.1143	1.90478	1.70749	-2.93737	0.223864	0.681334	2.05241	-0.498534	2.28568	0.0188664	-0.188739	-0.239911	0.0209925	-0.472581	-1.28726	2.76915	-2.10282	-0.579598	0.00417732
18	-0.852209	-0.826221	-2.47862	-2.6403	3.72821	0.505082	-1.30737	-1.51124	1.18471	-2.82223	-0.0605515	-0.308104	0.202828	-0.550083	-0.0180973	0.785715	-2.10282	2.78392	1.8334	-0.0962673
19	-2.76891	-0.281775	-1.96281	-2.62686	2.45156	1.31001	-1.39312	0.410996	1.54402	-2.25141	0.379227	-0.53487	0.426495	-0.337169	-0.579711	0.770717	-0.579598	1.8334	2.44385	-0.0319798
20	-0.00573947	-0.0594554	0.0280862	0.0523161	-0.0798453	0.0299575	0.0233411	0.0509215	0.023678	0.0307469	0.0851045	0.0130584	0.0139067	0.0444397	-0.062571	0.0432839	0.00417732	-0.0962673	-0.0319798	0.0198204
21-dimensional	20.5503	7.90323	2.43616	3.49299	-1.076	-0.235333	-1.15579	-0.743586	0.496769	0.133419	-2.05586	-1.85059	0.712561	0.905159	0.30662	-0.382072	0.344559	-0.0498588	0.884656	-0.618274	0.559633
2	7.90323	22.0354	1.58745	3.67061	0.682046	0.65196	-0.893437	-1.76544	3.27287	-3.06938	-3.45895	-1.67443	-1.98314	-2.68214	-0.447219	-0.947386	1.01412	-2.49569	1.77943	-0.124984	0.136612
3	2.43616	1.58745	12.8013	-0.770605	1.1606	0.866399	2.17399	-0.0128624	-3.3526	-0.606939	1.79029	1.67824	1.6098	1.72886	0.832873	-0.14236	0.238388	0.702233	0.254095	-0.85171	0.683819
4	3.49299	3.67061	-0.770605	24.607	6.47072	-3.34024	-0.583941	-3.6277	2.49275	-4.18324	2.99851	-3.97728	-2.04071	1.34581	-1.20691	1.09799	-0.66546	-2.76509	0.706339	0.316605	-0.336771
5	-1.076	0.682046	1.1606	6.47072	11.5111	-3.36264	6.37837	-1.10502	0.948379	-3.04767	2.0908	-0.971143	0.390724	4.33021	0.00193783	0.68658	1.41884	-2.50768	1.47341	-0.0828794	0.0790108
6	-0.235333	0.65196	0.866399	-3.34024	-3.36264	15.6041	4.8119	-0.154809	-1.28005	-0.292417	4.07781	1.87341	-2.04347	-1.32573	-0.46636	0.268472	-0.94033	-1.89849	1.0871	-0.215625	0.303526
7	-1.15579	-0.893437	2.17399	-0.583941	6.37837	4.8119	13.1419	1.14285	-2.88694	0.613438	2.41542	2.61352	-0.597484	4.55417	0.534565	1.14288	2.65238	-2.4351	2.22466	-0.308833	0.312763
8	-0.743586	-1.76544	-0.0128624	-3.6277	-1.10502	-0.154809	1.14285	8.37267	-1.97324	0.265958	2.72272	4.03682	2.22074	-0.186201	0.680228	-1.41573	0.107929	1.67374	-0.693022	-0.203794	0.217944
9	0.496769	3.27287	-3.3526	2.49275	0.948379	-1.28005	-2.88694	-1.97324	6.75855	-1.09425	0.521041	-2.91123	0.0187331	-1.56625	-0.790035	0.295443	0.470644	-1.39567	0.958449	0.367608	-0.30047
10	0.133419	-3.06938	-0.606939	-4.18324	-3.04767	-0.292417	0.613438	0.265958	-1.09425	8.74184	0.809887	0.562519	-0.952632	-1.52607	0.705469	2.15701	1.81744	2.10139	-0.0131857	-0.0153758	-0.114746
11	-2.05586	-3.45895	1.79029	2.99851	2.0908	4.07781	2.41542	2.72272	0.521041	0.809887	23.3921	-2.63809	0.25082	-2.40036	1.78739	-0.861302	1.45584	2.72407	-0.357921	-0.814468	0.661304
12	-1.85059	-1.67443	1.67824	-3.97728	-0.971143	1.87341	2.61352	4.03682	-2.91123	0.562519	-2.63809	7.05084	3.83007	2.15167	-0.0604974	-0.412676	-1.2879	1.23167	-1.06586	0.141999	-0.0811106
13	0.712561	-1.98314	1.6098	-2.04071	0.390724	-2.04347	-0.597484	2.22074	0.0187331	-0.952632	0.25082	3.83007	7.41347	4.30898	0.424607	-0.766522	-1.33986	2.41611	-1.27868	-0.257812	0.281535
14	0.905159	-2.68214	1.72886	1.34581	4.33021	-1.32573	4.55417	-0.186201	-1.56625	-1.52607	-2.40036	2.15167	4.30898	9.21605	-0.400082	1.03898	-0.68715	-0.402226	-0.478525	0.257551	-0.292845
15	0.30662	-0.447219	0.832873	-1.20691	0.00193783	-0.46636	0.534565	0.680228	-0.790035	0.705469	1.78739	-0.0604974	0.424607	-0.400082	0.992723	-0.278219	0.966671	0.89023	0.198676	-0.448806	0.387121
16	-0.382072	-0.947386	-0.14236	1.09799	0.68658	0.268472	1.14288	-1.41573	0.295443	2.15701	-0.861302	-0.412676	-0.766522	1.03898	-0.278219	2.13897	0.655518	-0.79874	0.693552	0.225003	-0.247481
17	0.344559	1.01412	0.238388	-0.66546	1.41884	-0.94033	2.65238	0.107929	0.470644	1.81744	1.45584	-1.2879	-1.33986	-0.68715	0.966671	0.655518	3.74856	-0.64316	2.28833	-0.678564	0.466631
18	-0.0498588	-2.49569	0.702233	-2.76509	-2.50768	-1.89849	-2.4351	1.67374	-1.39567	2.10139	2.72407	1.23167	2.41611	-0.402226	0.89023	-0.79874	-0.64316	3.35196	-1.92514	-0.134749	0.0874973
19	0.884656	1.77943	0.254095	0.706339	1.47341	1.0871	2.22466	-0.693022	0.958449	-0.0131857	-0.357921	-1.06586	-1.27868	-0.478525	0.198676	0.693552	2.28833	-1.92514	2.6179	-0.598165	0.50132
20	-0.618274	-0.124984	-0.85171	0.316605	-0.0828794	-0.215625	-0.308833	-0.203794	0.367608	-0.0153758	-0.814468	0.141999	-0.257812	0.257551	-0.448806	0.225003	-0.678564	-0.134749	-0.598165	0.449215	-0.382843
21	0.559633	0.136612	0.683819	-0.336771	0.0790108	0.303526	0.312763	0.217944	-0.30047	-0.114746	0.661304	-0.0811106	0.281535	-0.292845	0.387121	-0.247481	0.466631	0.0874973	0.50132	-0.382843	0.349083
22-dimensional	29.8059	13.9932	0.65	7.77074	1.36915	-1.85405	1.59001	-0.722853	1.6532	-1.44829	0.303536	0.919776	3.04565	-2.55642	-2.62184	-1.42008	1.10723	1.41414	0.785155	-0.642818	1.08881	0.452665
2	13.9932	29.1409	0.0579328	5.47955	1.78897	-0.980152	3.59478	0.804925	-1.84173	-0.61499	6.32789	3.41028	0.233616	-1.32304	-2.10431	3.89793	-0.321988	1.41912	-0.246241	0.339981	-2.31314	-0.419953
3	0.65	0.0579328	10.0636	4.36471	-1.55556	-0.387497	-0.142835	0.279869	2.85296	-0.230343	-3.21807	1.32283	-1.2493	1.94606	-0.219122	1.2296	-0.659619	0.581657	-0.186861	0.627927	-1.7223	-0.49541
4	7.77074	5.47955	4.36471	22.8578	0.425434	-0.437868	0.516743	-0.293096	2.68814	-2.1784	-2.55893	1.75003	-0.878119	-1.05557	1.43165	0.253504	-0.872517	2.21959	0.630001	0.356966	0.0771589	-0.106407
5	1.36915	1.78897	-1.55556	0.425434	11.9284	-3.8495	-2.29641	0.463913	2.19754	1.11125	-1.39339	0.214195	2.80208	1.71023	-1.20965	-1.40885	0.105096	-1.61236	-1.52454	0.854259	-2.46154	-0.710891
6	-1.85405	-0.980152	-0.387497	-0.437868	-3.8495	12.9692	-0.812239	-0.220064	-3.69273	-1.14666	2.19744	0.0292994	-1.76629	0.387395	3.48693	1.92066	-0.579018	0.870608	-2.1212	0.504046	-0.552791	-0.131166
7	1.59001	3.59478	-0.142835	0.516743	-2.29641	-0.812239	9.0359	0.719574	-0.978391	-4.08215	5.46116	2.38979	-2.8811	0.572198	-4.24727	-0.496353	-2.96147	6.16014	4.24918	-0.0415386	1.42879	0.478896
8	-0.722853	0.804925	0.279869	-0.293096	0.463913	-0.220064	0.719574	2.9733	-0.667973	-1.00806	-0.136531	-0.396201	-1.88369	-0.632075	0.250903	0.25002	0.345461	0.560327	-0.759255	-0.247815	0.492087	0.260607
9	1.6532	-1.84173	2.85296	2.68814	2.19754	-3.69273	-0.978391	-0.667973	11.3724	0.39266	-3.31434	-4.41184	2.92875	-1.00354	-3.98865	-0.0531036	-0.449408	-2.17941	1.28468	0.515873	-2.23553	-0.658965
10	-1.44829	-0.61499	-0.230343	-2.1784	1.11125	-1.14666	-4.08215	-1.00806	0.39266	5.86071	-0.514561	-1.79807	3.83244	-0.289434	-1.07151	-0.0225234	2.48674	-6.19938	-1.32304	-0.254449	-1.1678	-0.311473
11	0.303536	6.32789	-3.21807	-2.55893	-1.39339	2.19744	5.46116	-0.136531	-3.31434	-0.514561	10.3347	-0.243334	-0.0812451	-0.459124	-4.66696	0.637862	-1.20468	1.53187	1.51295	0.273379	0.743871	0.47915
12	0.919776	3.41028	1.32283	1.75003	0.214195	0.0292994	2.38979	-0.396201	-4.41184	-1.79807	-0.243334	12.8103	-2.75456	3.63618	1.02778	2.0963	-2.30035	4.04983	-0.439001	0.587987	-1.94163	-0.4986
13	3.04565	0.233616	-1.2493	-0.878119	2.80208	-1.76629	-2.8811	-1.88369	2.92875	3.83244	-0.0812451	-2.75456	6.45574	-1.26941	-2.55537	-1.38711	2.04453	-4.62522	-0.0949089	-0.349647	-0.54809	-0.141134
14	-2.55642	-1.32304	1.94606	-1.05557	1.71023	0.387395	0.572198	-0.632075	-1.00354	-0.289434	-0.459124	3.63618	-1.26941	6.84535	-0.254492	1.27696	-3.09817	1.28975	-0.0484098	0.984131	-2.36971	-0.681644
15	-2.62184	-2.10431	-0.219122	1.43165	-1.20965	3.48693	-4.24727	0.250903	-3.98865	-1.07151	-4.66696	1.02778	-2.55537	-0.254492	11.0713	1.31546	0.363882	1.67759	-2.36453	1.22089	1.24569	-0.154899
16	-1.42008	3.89793	1.2296	0.253504	-1.40885	1.92066	-0.496353	0.25002	-0.0531036	-0.0225234	0.637862	2.0963	-1.38711	1.27696	1.31546	6.02354	-0.0500704	0.122123	-2.75717	0.887642	-3.73424	-0.849327
17	1.10723	-0.321988	-0.659619	-0.872517	0.105096	-0.579018	-2.96147	0.345461	-0.449408	2.48674	-1.20468	-2.30035	2.04453	-3.09817	0.363882	-0.0500704	3.79573	-3.37677	-2.23519	-0.62209	0.490645	0.274106
18	1.41414	1.41912	0.581657	2.21959	-1.61236	0.870608	6.16014	0.560327	-2.17941	-6.19938	1.53187	4.04983	-4.62522	1.28975	1.67759	0.122123	-3.37677	8.91966	2.88988	0.946759	1.30847	0.162421
19	0.785155	-0.246241	-0.186861	0.630001	-1.52454	-2.1212	4.24918	-0.759255	1.28468	-1.32304	1.51295	-0.439001	-0.0949089	-0.0484098	-2.36453	-2.75717	-2.23519	2.88988	5.42215	-0.405588	2.04743	0.273543
20	-0.642818	0.339981	0.627927	0.356966	0.854259	0.504046	-0.0415386	-0.247815	0.515873	-0.254449	0.273379	0.587987	-0.349647	0.984131	1.22089	0.887642	-0.62209	0.946759	-0.405588	1.34919	-0.67048	-0.302132
21	1.08881	-2.31314	-1.7223	0.0771589	-2.46154	-0.552791	1.42879	0.492087	-2.23553	-1.1678	0.743871	-1.94163	-0.54809	-2.36971	1.24569	-3.73424	0.490645	1.30847	2.04743	-0.67048	5.32107	1.35079
22	0.452665	-0.419953	-0.49541	-0.106407	-0.710891	-0.131166	0.478896	0.260607	-0.658965	-0.311473	0.47915	-0.4986	-0.141134	-0.681644	-0.154899	-0.849327	0.274106	0.162421	0.273543	-0.302132	1.35079	0.412777
23-dimensional	37.1333	-6.32489	2.05946	-0.712485	-0.849846	-2.00202	1.83815	-3.10617	6.24858	0.33258	1.01396	-0.489949	-0.786894	-3.98793	1.47808	-1.87512	-1.19899	-1.57866	-2.71206	0.416158	-1.05054	0.155511	1.12419
2	-6.32489	25.7986	-1.4867	-6.26967	-1.01885	5.1848	0.807403	-4.03113	-1.37824	-0.644835	7.10799	-1.12281	-1.5781	-4.79646	-0.258964	2.05314	-0.108077	-0.986139	2.21762	0.478641	-1.16348	-0.276359	0.48416
3	2.05946	-1.4867	14.9482	1.78406	0.491247	3.12382	0.614523	-2.48565	-4.28847	2.56662	1.02683	0.12344	-2.46382	-2.99457	-0.407056	-0.841493	-0.0564232	-1.12974	-0.108024	-0.738415	1.39517	0.26674	-1.05786
4	-0.712485	-6.26967	1.78406	25.8402	1.49749	-3.90504	-3.31008	-2.342	-3.4672	-0.0113551	-0.559483	2.70291	0.410562	-0.175189	-1.67552	0.946968	2.7817	1.85194	2.30952	-0.0641008	1.16072	0.0436521	-0.606116
5	-0.849846	-1.01885	0.491247	1.49749	13.5839	-6.78826	-0.315138	-3.31759	0.134435	-2.22499	-3.33048	-0.867651	-0.505008	-3.21576	0.742004	1.68326	-0.516543	-2.57848	0.65047	-0.35218	-0.320908	0.0926326	0.142384
6	-2.00202	5.1848	3.12382	-3.90504	-6.78826	19.5731	1.59714	0.0374278	-2.96451	0.784744	0.579408	-6.73558	-1.98447	-0.911112	-0.494012	1.37695	0.755061	1.28987	3.79896	0.187901	-1.45224	-0.228821	0.502459
7	1.83815	0.807403	0.614523	-3.31008	-0.315138	1.59714	3.52603	0.619506	0.766158	0.793099	0.294914	-3.25894	0.388828	0.569957	0.602	-0.361065	-1.5699	-0.620614	-0.675696	0.357884	-0.690718	-0.054774	0.319617
8	-3.10617	-4.03113	-2.48565	-2.342	-3.31759	0.0374278	0.619506	10.5126	3.0165	-1.7252	-2.04964	-0.853175	-1.34869	3.78727	-0.214669	-1.6319	-0.480032	0.972947	-0.529263	0.531425	-1.74192	-0.429053	0.297378
9	6.24858	-1.37824	-4.28847	-3.4672	0.134435	-2.96451	0.766158	3.0165	13.0587	-2.49173	-2.62814	-2.36124	0.441464	-2.06759	2.11406	-1.83583	-0.608257	0.877421	-2.84383	0.4526	-3.3382	-0.293693	1.86139
10	0.33258	-0.644835	2.56662	-0.0113551	-2.22499	0.784744	0.793099	-1.7252	-2.49173	6.53541	1.76314	0.475069	2.05463	1.56113	-0.27212	-1.70785	0.337768	1.53284	-2.31685	-0.817776	2.10041	0.294208	-1.50284
11	1.01396	7.10799	1.02683	-0.559483	-3.33048	0.579408	0.294914	-2.04964	-2.62814	1.76314	16.5813	1.69128	1.0085	0.92448	-0.193491	1.4389	0.949059	1.5788	1.87597	-0.112276	-0.938673	-0.188215	0.296481
12	-0.489949	-1.12281	0.12344	2.70291	-0.867651	-6.73558	-3.25894	-0.853175	-2.36124	0.475069	1.69128	8.99411	-0.229557	0.3769	-1.31647	-1.30243	1.37184	-0.737104	-2.12506	-0.539209	2.64606	0.26289	-1.61418
13	-0.786894	-1.5781	-2.46382	0.410562	-0.505008	-1.98447	0.388828	-1.34869	0.441464	2.05463	1.0085	-0.229557	8.02369	5.29196	-0.202145	0.94691	2.41205	1.33903	-1.48711	-0.570339	1.29253	0.231456	-0.580472
14	-3.98793	-4.79646	-2.99457	-0.175189	-3.21576	-0.911112	0.569957	3.78727	-2.06759	1.56113	0.92448	0.3769	5.29196	11.0299	-0.320876	0.546997	0.712405	0.687534	-1.13507	-0.252037	1.58379	0.0852097	-0.538931
15	1.47808	-0.258964	-0.407056	-1.67552	0.742004	-0.494012	0.602	-0.214669	2.11406	-0.27212	-0.193491	-1.31647	-0.202145	-0.320876	1.69164	-0.369221	-1.80924	-0.017656	-0.38763	0.00291933	-0.856945	0.0542112	0.807755
16	-1.87512	2.05314	-0.841493	0.946968	1.68326	1.37695	-0.361065	-1.6319	-1.83583	-1.70785	1.4389	-1.30243	0.94691	0.546997	-0.369221	4.55615	0.824479	-0.552526	2.75987	0.139911	0.232002	-0.125589	0.239291
17	-1.19899	-0.108077	-0.0564232	2.7817	-0.516543	0.755061	-1.5699	-0.480032	-0.608257	0.337768	0.949059	1.37184	2.41205	0.712405	-1.80924	0.824479	4.60633	0.82456	0.525148	-0.518803	0.714648	0.0200303	-0.815033
18	-1.57866	-0.986139	-1.12974	1.85194	-2.57848	1.28987	-0.620614	0.972947	0.877421	1.53284	1.5788	-0.737104	1.33903	0.687534	-0.017656	-0.552526	0.82456	4.32032	0.894585	-0.0356569	-0.717512	-0.0331866	0.154066
19	-2.71206	2.21762	-0.108024	2.30952	0.65047	3.79896	-0.675696	-0.529263	-2.84383	-2.31685	1.87597	-2.12506	-1.48711	-1.13507	-0.38763	2.75987	0.525148	0.894585	4.7148	0.564938	-1.36295	-0.172279	0.888397
20	0.416158	0.478641	-0.738415	-0.0641008	-0.35218	0.187901	0.357884	0.531425	0.4526	-0.817776	-0.112276	-0.539209	-0.570339	-0.252037	0.00291933	0.139911	-0.518803	-0.0356569	0.564938	0.490025	-0.617773	-0.0992138	0.376772
21	-1.05054	-1.16348	1.39517	1.16072	-0.320908	-1.45224	-0.690718	-1.74192	-3.3382	2.10041	-0.938673	2.64606	1.29253	1.58379	-0.856945	0.232002	0.714648	-0.717512	-1.36295	-0.617773	2.73507	0.263347	-1.38103
22	0.155511	-0.276359	0.26674	0.0436521	0.0926326	-0.228821	-0.054774	-0.429053	-0.293693	0.294208	-0.188215	0.26289	0.231456	0.0852097	0.0542112	-0.125589	0.0200303	-0.0331866	-0.172279	-0.0992138	0.263347	0.07784	-0.0875941
23	1.12419	0.48416	-1.05786	-0.606116	0.142384	0.502459	0.319617	0.297378	1.86139	-1.50284	0.296481	-1.61418	-0.580472	-0.538931	0.807755	0.239291	-0.815033	0.154066	0.888397	0.376772	-1.38103	-0.0875941	1.0315
24-dimensional	37.8874	0.248232	-1.75028	1.26369	1.9193	-0.937445	1.92244	5.56673	-0.487388	2.88499	2.84196	-0.214385	-1.25627	4.56823	-0.303724	-1.37001	-0.193805	-4.49146	-1.66052	0.777001	0.415088	-0.522452	1.06457	-0.021867
2	0.248232	27.3227	-4.52116	1.62869	0.533559	-1.27445	-2.83891	1.73821	-2.27655	0.216184	0.219145	-2.52368	1.84387	1.24299	-1.37338	-1.50803	0.989104	-2.70632	4.42907	1.68441	0.726581	0.885633	-0.0523603	0.106823
3	-1.75028	-4.52116	15.0475	-3.30554	-0.944349	4.35008	0.609006	-2.16676	0.625252	0.0833435	1.1394	1.41469	-0.423105	-4.00471	1.10569	1.21953	-1.28175	3.35583	0.60866	0.767583	1.10022	-0.161096	-1.13998	0.0119965
4	1.26369	1.62869	-3.30554	29.4305	-0.555388	-5.61331	-5.09169	0.997448	-1.06079	0.860725	-1.47445	-1.25689	1.73656	2.42311	-0.402404	-0.423866	-0.375197	-5.52023	0.0542404	3.22471	2.73279	0.700754	-1.39601	0.108159
5	1.9193	0.533559	-0.944349	-0.555388	10.9644	3.10816	0.169063	2.95068	0.84258	0.0589724	1.98406	2.10867	2.01675	-1.06271	1.34026	-2.86765	1.1219	-0.348822	-0.0438602	-2.19232	-1.36444	-1.03169	-0.261782	-0.0593047
6	-0.937445	-1.27445	4.35008	-5.61331	3.10816	22.0974	0.0923967	-2.44516	2.13114	0.559859	-0.0164192	-2.21407	1.58703	-3.6403	1.55206	-2.20622	0.271315	5.04329	2.3638	-1.33835	-0.412427	-0.939846	-0.155076	-0.0363948
7	1.92244	-2.83891	0.609006	-5.09169	0.169063	0.0923967	13.2806	-0.951981	1.48714	2.55244	6.78666	2.50995	-2.85272	1.3543	0.799573	-1.37332	1.30154	7.29595	-2.09114	-2.53336	-1.3657	-1.80074	1.3329	-0.176946
8	5.56673	1.73821	-2.16676	0.997448	2.95068	-2.44516	-0.951981	10.4398	-4.78493	-1.15803	-1.75249	5.13485	-2.04805	1.8398	-1.12971	0.168924	-0.0908276	-4.51127	-1.12714	-0.723866	-0.478958	0.62489	-0.814533	0.01917
9	-0.487388	-2.27655	0.625252	-1.06079	0.84258	2.13114	1.48714	-4.78493	8.43077	2.21183	4.47176	-1.52274	0.560007	-0.761241	1.8743	-0.0969929	-0.990191	4.83305	-2.30243	-1.64729	-0.162557	-1.46296	1.24707	-0.0868041
10	2.88499	0.216184	0.0833435	0.860725	0.0589724	0.559859	2.55244	-1.15803	2.21183	5.55023	1.38197	-0.367127	-1.01576	2.25807	1.18591	-1.45009	0.850175	1.62132	-0.905439	-0.312786	0.38415	-1.59275	1.36468	-0.0635726
11	2.84196	0.219145	1.1394	-1.47445	1.98406	-0.0164192	6.78666	-1.75249	4.47176	1.38197	12.3171	0.603148	-1.50322	2.25315	0.431036	-0.441552	0.350286	3.34746	-0.49779	-0.0349346	-0.05717	-0.320149	0.869148	-0.0311661
12	-0.214385	-2.52368	1.41469	-1.25689	2.10867	-2.21407	2.50995	5.13485	-1.52274	-0.367127	0.603148	13.5241	-1.8562	0.413729	0.957002	1.75264	1.59048	1.93678	-2.34196	-0.816401	-0.446067	-0.839371	0.420175	-0.0505702
13	-1.25627	1.84387	-0.423105	1.73656	2.01675	1.58703	-2.85272	-2.04805	0.560007	-1.01576	-1.50322	-1.8562	5.5635	-4.01435	-0.263391	-2.24916	1.43326	0.513647	2.66373	1.04791	0.83821	-0.0571533	-0.172314	0.0339795
14	4.56823	1.24299	-4.00471	2.42311	-1.06271	-3.6403	1.3543	1.8398	-0.761241	2.25807	2.25315	0.413729	-4.01435	14.6318	0.254646	-0.292522	0.850163	-4.32039	0.549449	-0.0626998	-1.55645	0.259062	0.785691	0.0201667
15	-0.303724	-1.37338	1.10569	-0.402404	1.34026	1.55206	0.799573	-1.12971	1.8743	1.18591	0.431036	0.957002	-0.263391	0.254646	2.70779	-0.660848	-1.25443	1.73149	-0.558416	-0.669173	-0.748388	-0.969627	0.21726	-0.0613751
16	-1.37001	-1.50803	1.21953	-0.423866	-2.86765	-2.20622	-1.37332	0.168924	-0.0969929	-1.45009	-0.441552	1.75264	-2.24916	-0.292522	-0.660848	6.96776	-1.68836	-2.76482	-3.06194	0.942995	0.673647	0.607129	-0.245097	0.0363216
17	-0.193805	0.989104	-1.28175	-0.375197	1.1219	0.271315	1.30154	-0.0908276	-0.990191	0.850175	0.350286	1.59048	1.43326	0.850163	-1.25443	-1.68836	6.13186	0.616375	0.798884	-0.414521	0.00696686	-0.746633	0.674065	-0.00700306
18	-4.49146	-2.70632	3.35583	-5.52023	-0.348822	5.04329	7.29595	-4.51127	4.83305	1.62132	3.34746	1.93678	0.513647	-4.32039	1.73149	-2.76482	0.616375	12.176	0.161237	-3.03224	-0.961334	-1.81353	1.28933	-0.149274
19	-1.66052	4.42907	0.60866	0.0542404	-0.0438602	2.3638	-2.09114	-1.12714	-2.30243	-0.905439	-0.49779	-2.34196	2.66373	0.549449	-0.558416	-3.06194	0.798884	0.161237	7.06544	1.3918	-0.760188	0.989615	0.492207	0.0880432
20	0.777001	1.68441	0.767583	3.22471	-2.19232	-1.33835	-2.53336	-0.723866	-1.64729	-0.312786	-0.0349346	-0.816401	1.04791	-0.0626998	-0.669173	0.942995	-0.414521	-3.03224	1.3918	4.50189	2.28154	1.29657	-0.827503	0.114831
21	0.415088	0.726581	1.10022	2.73279	-1.36444	-0.412427	-1.3657	-0.478958	-0.162557	0.38415	-0.05717	-0.446067	0.83821	-1.55645	-0.748388	0.673647	0.00696686	-0.961334	-0.760188	2.28154	2.5289	0.438185	-1.10533	0.0599337
22	-0.522452	0.885633	-0.161096	0.700754	-1.03169	-0.939846	-1.80074	0.62489	-1.46296	-1.59275	-0.320149	-0.839371	-0.0571533	0.259062	-0.969627	0.607129	-0.746633	-1.81353	0.989615	1.29657	0.438185	1.24189	-0.636538	0.0692652
23	1.06457	-0.0523603	-1.13998	-1.39601	-0.261782	-0.155076	1.3329	-0.814533	1.24707	1.36468	0.869148	0.420175	-0.172314	0.785691	0.21726	-0.245097	0.674065	1.28933	0.492207	-0.827503	-1.10533	-0.636538	1.81939	-0.0405467
24	-0.021867	0.106823	0.0119965	0.108159	-0.0593047	-0.0363948	-0.176946	0.01917	-0.0868041	-0.0635726	-0.0311661	-0.0505702	0.0339795	0.0201667	-0.0613751	0.0363216	-0.00700306	-0.149274	0.0880432	0.114831	0.0599337	0.0692652	-0.0405467	0.00553327
25-dimensional	38.4972	1.02831	-1.06392	6.69361	0.246878	-5.61239	-3.66754	2.40746	4.56125	-2.99072	5.75141	-0.261105	0.868234	0.11777	1.49107	-0.152951	-2.57935	-3.59828	0.964637	0.153036	1.75133	-1.70885	1.0579	-1.56914	-0.0868002
2	1.02831	26.9353	-2.50775	3.39316	1.56613	-6.1542	4.10916	1.28127	1.27134	4.45223	-2.98069	-3.27289	1.47837	-0.958397	-1.43138	1.54607	1.73826	-2.56593	-0.511204	-0.416773	-2.94952	-0.720992	0.421304	1.09456	-0.488791
3	-1.06392	-2.50775	15.3164	-2.22272	-1.41105	3.77652	-2.76261	-1.20892	-1.3254	-0.160737	-0.352293	3.46716	-0.961403	1.04889	0.94398	1.96436	-2.1861	0.257415	1.33357	0.607864	0.759324	0.0300525	-0.665498	-0.638318	0.242767
4	6.69361	3.39316	-2.22272	24.9547	-1.67981	-7.00558	-1.55803	0.0987999	2.22307	-5.41716	5.51316	2.83385	-1.61057	-1.63756	3.16177	-2.00277	0.878797	-0.696332	1.79657	0.600595	2.76903	-1.87792	2.92957	-0.00101626	0.189905
5	0.246878	1.56613	-1.41105	-1.67981	8.59154	1.86071	1.99103	0.871916	-0.0719328	2.1708	-2.93007	-1.37008	1.97719	3.37993	-1.40101	1.08542	-3.57885	2.81705	1.82519	0.559108	0.38224	0.928863	-0.742173	-0.714459	-0.0124137
6	-5.61239	-6.1542	3.77652	-7.00558	1.86071	21.8655	-1.53532	1.48505	1.61645	0.0740284	1.20112	2.54125	3.22471	2.42725	-2.93393	3.45843	-2.72609	2.78574	-0.703418	0.852162	0.869332	1.6147	-1.98222	-2.51552	0.328068
7	-3.66754	4.10916	-2.76261	-1.55803	1.99103	-1.53532	10.9704	-1.68154	-0.351031	1.64863	-0.728675	-0.419147	-2.10081	3.42138	-2.13702	-0.265536	3.96028	1.40152	-2.15401	0.280816	-0.31863	-0.0791479	0.779541	1.0646	-0.0776328
8	2.40746	1.28127	-1.20892	0.0987999	0.871916	1.48505	-1.68154	13.0511	4.20034	-0.369428	-2.71521	-0.914228	1.34272	-1.01634	-0.711233	2.5197	-0.494289	-2.19234	-0.106911	0.592113	2.02909	-1.47158	0.82415	-3.01405	0.209238
9	4.56125	1.27134	-1.3254	2.22307	-0.0719328	1.61645	-0.351031	4.20034	13.4197	-2.63959	4.5279	0.392127	2.84963	1.30907	-2.59132	0.519186	-1.25382	-0.672902	-4.87045	0.53779	4.03301	-2.01598	1.29783	-3.37806	0.441076
10	-2.99072	4.45223	-0.160737	-5.41716	2.1708	0.0740284	1.64863	-0.369428	-2.63959	9.15251	-3.91859	-2.86481	0.936534	0.934925	-1.61455	2.94483	-2.52083	0.0128628	0.00876833	-0.642845	-4.11192	2.10522	-2.13311	0.924946	-0.359016
11	5.75141	-2.98069	-0.352293	5.51316	-2.93007	1.20112	-0.728675	-2.71521	4.5279	-3.91859	18.6799	3.89938	-1.00539	0.456939	-0.0538776	-0.358479	-0.688616	0.809611	-0.822273	1.03573	0.82253	0.901163	-0.132614	0.145214	0.0527561
12	-0.261105	-3.27289	3.46716	2.83385	-1.37008	2.54125	-0.419147	-0.914228	0.392127	-2.86481	3.89938	12.4148	-4.46718	1.81459	0.59753	3.52751	0.432011	-1.00174	-2.36795	0.312666	2.23983	-0.516405	0.14072	-1.17272	0.516444
13	0.868234	1.47837	-0.961403	-1.61057	1.97719	3.22471	-2.10081	1.34272	2.84963	0.936534	-1.00539	-4.46718	8.68055	2.35192	-2.97779	-1.18475	-1.64494	2.90777	0.531063	-0.205759	-1.45521	-0.373733	-0.994393	-0.427996	-0.123326
14	0.11777	-0.958397	1.04889	-1.63756	3.37993	2.42725	3.42138	-1.01634	1.30907	0.934925	0.456939	1.81459	2.35192	9.81338	-3.0335	0.404734	-2.8784	2.14345	-2.47159	0.388433	0.990362	0.515095	-1.7033	-1.74804	0.240941
15	1.49107	-1.43138	0.94398	3.16177	-1.40101	-2.93393	-2.13702	-0.711233	-2.59132	-1.61455	-0.0538776	0.59753	-2.97779	-3.0335	4.34527	-0.630827	-0.58689	-1.86549	2.74354	0.733645	1.09531	-0.124327	1.2639	0.783216	-0.00492586
16	-0.152951	1.54607	1.96436	-2.00277	1.08542	3.45843	-0.265536	2.5197	0.519186	2.94483	-0.358479	3.52751	-1.18475	0.404734	-0.630827	6.04586	-1.29443	-2.07325	0.129348	0.349385	0.561236	-0.652236	-0.140533	-1.72391	0.167667
17	-2.57935	1.73826	-2.1861	0.878797	-3.57885	-2.72609	3.96028	-0.494289	-1.25382	-2.52083	-0.688616	0.432011	-1.64494	-2.8784	-0.58689	-1.29443	8.76888	-1.90783	-2.79346	-1.11742	-0.687534	-2.2295	1.91955	1.4194	-0.0615086
18	-3.59828	-2.56593	0.257415	-0.696332	2.81705	2.78574	1.40152	-2.19234	-0.672902	0.0128628	0.809611	-1.00174	2.90777	2.14345	-1.86549	-2.07325	-1.90783	13.2216	6.18138	0.427988	0.519707	1.73648	0.201539	0.482041	0.379799
19	0.964637	-0.511204	1.33357	1.79657	1.82519	-0.703418	-2.15401	-0.106911	-4.87045	0.00876833	-0.822273	-2.36795	0.531063	-2.47159	2.74354	0.129348	-2.79346	6.18138	12.0304	1.1865	-0.189982	0.133728	1.3686	0.902092	-0.169321
20	0.153036	-0.416773	0.607864	0.600595	0.559108	0.852162	0.280816	0.592113	0.53779	-0.642845	1.03573	0.312666	-0.205759	0.388433	0.733645	0.349385	-1.11742	0.427988	1.1865	1.84504	1.10111	1.07982	-0.00498117	-0.876496	0.0864922
21	1.75133	-2.94952	0.759324	2.76903	0.38224	0.869332	-0.31863	2.02909	4.03301	-4.11192	0.82253	2.23983	-1.45521	0.990362	1.09531	0.561236	-0.687534	0.519707	-0.189982	1.10111	5.5568	-1.9802	2.23685	-2.42491	0.614295
22	-1.70885	-0.720992	0.0300525	-1.87792	0.928863	1.6147	-0.0791479	-1.47158	-2.01598	2.10522	0.901163	-0.516405	-0.373733	0.515095	-0.124327	-0.652236	-2.2295	1.73648	0.133728	1.07982	-1.9802	4.22912	-2.31734	0.0777955	-0.125229
23	1.0579	0.421304	-0.665498	2.92957	-0.742173	-1.98222	0.779541	0.82415	1.29783	-2.13311	-0.132614	0.14072	-0.994393	-1.7033	1.2639	-0.140533	1.91955	0.201539	1.3686	-0.00498117	2.23685	-2.31734	2.62235	-0.0497288	0.183512
24	-1.56914	1.09456	-0.638318	-0.00101626	-0.714459	-2.51552	1.0646	-3.01405	-3.37806	0.924946	0.145214	-1.17272	-0.427996	-1.74804	0.783216	-1.72391	1.4194	0.482041	0.902092	-0.876496	-2.42491	0.0777955	-0.0497288	2.96811	-0.315646
25	-0.0868002	-0.488791	0.242767	0.189905	-0.0124137	0.328068	-0.0776328	0.209238	0.441076	-0.359016	0.0527561	0.516444	-0.123326	0.240941	-0.00492586	0.167667	-0.0615086	0.379799	-0.169321	0.0864922	0.614295	-0.125229	0.183512	-0.315646	0.107728
26-dimensional	27.8896	-3.89109	2.58064	2.06188	-0.311791	9.56943	-0.918786	-0.169594	-2.65892	-0.143634	-5.95686	4.2651	-1.03998	-5.70061	3.50738	0.622053	-3.05448	-1.00718	1.51656	0.467844	-3.07937	1.01748	-0.524998	-0.389425	0.0892027	-0.307467
2	-3.89109	34.253	3.11611	0.327168	0.750335	0.798767	1.02017	-0.0246804	-2.68666	-1.05603	-0.49715	0.231721	0.763679	-3.4676	-1.50856	1.99347	-2.67274	-5.182	3.61814	-0.85634	-0.0309966	0.40171	1.30179	-0.872002	0.091798	-0.0756696
3	2.58064	3.11611	23.0235	-2.66909	3.93314	7.21556	0.303061	0.494493	-1.86655	0.863304	2.19502	4.55748	1.96076	0.755458	1.6555	0.611095	2.45997	-2.07885	1.24782	0.702261	-0.0283666	0.559021	-1.58337	0.661693	-0.361609	-0.145232
4	2.06188	0.327168	-2.66909	28.4809	-0.836004	-11.9822	-2.56649	-2.25948	0.995178	-0.494505	1.72441	-5.81279	3.53162	-3.26172	-0.30701	5.04003	0.422325	-3.42354	-4.53588	-3.31093	3.47115	-2.01746	1.90389	-0.611774	0.618583	0.588983
5	-0.311791	0.750335	3.93314	-0.836004	13.991	3.2099	0.96627	4.41571	1.26186	3.43283	2.23968	2.69252	0.456662	-1.13329	1.65957	5.525	0.289325	0.614911	-0.537789	-0.449231	0.00471553	0.766797	-0.501952	-0.289274	-0.743321	-0.433961
6	9.56943	0.798767	7.21556	-11.9822	3.2099	30.753	1.51665	0.87088	0.65523	2.32341	-6.84302	3.83582	-0.889518	0.974539	3.78189	1.29926	-0.192739	3.22432	4.09722	3.46846	-3.89424	1.43766	-1.32534	-0.519167	0.793979	-0.134503
7	-0.918786	1.02017	0.303061	-2.56649	0.96627	1.51665	11.2723	3.01433	1.80489	2.62926	-2.1444	2.62832	1.12055	2.3808	-3.87803	-0.417545	0.961504	0.196939	6.24372	-0.398857	1.50823	-0.10392	1.80154	-1.67068	1.13477	0.261041
8	-0.169594	-0.0246804	0.494493	-2.25948	4.41571	0.87088	3.01433	13.0162	2.82567	-0.54679	-4.9345	0.537322	-1.83812	2.39354	-0.604421	2.16953	0.43428	0.16315	-2.16771	0.0453822	-2.11814	1.42984	0.748293	-0.378237	-0.840719	-0.43833
9	-2.65892	-2.68666	-1.86655	0.995178	1.26186	0.65523	1.80489	2.82567	9.82785	2.14046	-2.35135	-0.69007	-3.00918	4.91117	3.48728	2.80567	4.01758	4.10155	-3.91563	1.75726	-1.16944	0.765453	1.71148	-2.13469	0.933644	-0.145581
10	-0.143634	-1.05603	0.863304	-0.494505	3.43283	2.32341	2.62926	-0.54679	2.14046	7.12993	4.10921	2.57925	0.264413	0.35689	1.9287	1.93721	0.393269	3.84578	2.37798	0.414496	-0.398562	0.122759	-0.348533	-0.827474	0.628109	-0.0577593
11	-5.95686	-0.49715	2.19502	1.72441	2.23968	-6.84302	-2.1444	-4.9345	-2.35135	4.10921	20.5427	-1.81084	1.98856	1.00003	3.08673	0.770481	-1.87502	0.374573	1.58178	1.3794	-0.672345	0.32083	-2.06893	0.53045	-0.0864351	-0.0788729
12	4.2651	0.231721	4.55748	-5.81279	2.69252	3.83582	2.62832	0.537322	-0.69007	2.57925	-1.81084	10.4423	1.88136	-1.3783	-0.933972	-2.03082	1.54354	1.53286	2.17087	0.652089	-1.96808	0.956518	-0.347833	-0.348941	-0.505264	-0.515719
13	-1.03998	0.763679	1.96076	3.53162	0.456662	-0.889518	1.12055	-1.83812	-3.00918	0.264413	1.98856	1.88136	9.1626	1.71853	-6.12532	-0.726962	1.26165	-1.42783	3.50474	-0.806047	1.32883	-0.248163	0.908286	-0.169694	-0.542064	-0.0955987
14	-5.70061	-3.4676	0.755458	-3.26172	-1.13329	0.974539	2.3808	2.39354	4.91117	0.35689	1.00003	-1.3783	1.71853	21.8875	-1.87342	0.257787	6.01056	3.2185	0.197701	1.3054	1.03187	-0.0693409	0.968389	-0.648648	0.743106	0.244529
15	3.50738	-1.50856	1.6555	-0.30701	1.65957	3.78189	-3.87803	-0.604421	3.48728	1.9287	3.08673	-0.933972	-6.12532	-1.87342	13.7298	3.8311	1.3647	3.18086	-5.48386	1.75111	-2.62212	0.669022	-2.7974	0.110772	0.997333	0.0346445
16	0.622053	1.99347	0.611095	5.04003	5.525	1.29926	-0.417545	2.16953	2.80567	1.93721	0.770481	-2.03082	-0.726962	0.257787	3.8311	8.08408	0.789922	-2.07013	-1.36345	-0.683951	0.926506	0.136717	0.837319	-1.16654	0.504961	0.0387362
17	-3.05448	-2.67274	2.45997	0.422325	0.289325	-0.192739	0.961504	0.43428	4.01758	0.393269	-1.87502	1.54354	1.26165	6.01056	1.3647	0.789922	10.5519	4.49461	-3.04032	1.6659	0.507925	0.258004	-0.914105	0.320226	0.264979	0.0956602
18	-1.00718	-5.182	-2.07885	-3.42354	0.614911	3.22432	0.196939	0.16315	4.10155	3.84578	0.374573	1.53286	-1.42783	3.2185	3.18086	-2.07013	4.49461	10.6767	-2.22979	1.30062	-2.6167	0.729989	-1.65793	0.0562237	0.0641627	-0.31537
19	1.51656	3.61814	1.24782	-4.53588	-0.537789	4.09722	6.24372	-2.16771	-3.91563	2.37798	1.58178	2.17087	3.50474	0.197701	-5.48386	-1.36345	-3.04032	-2.22979	12.2025	-0.0861109	2.13209	-0.0959804	0.812419	-1.20074	0.476945	-0.0631884
20	0.467844	-0.85634	0.702261	-3.31093	-0.449231	3.46846	-0.398857	0.0453822	1.75726	0.414496	1.3794	0.652089	-0.806047	1.3054	1.75111	-0.683951	1.6659	1.30062	-0.0861109	5.32696	-2.56158	1.11095	-0.857912	0.0287856	0.315398	-0.0661723
21	-3.07937	-0.0309966	-0.0283666	3.47115	0.00471553	-3.89424	1.50823	-2.11814	-1.16944	-0.398562	-0.672345	-1.96808	1.32883	1.03187	-2.62212	0.926506	0.507925	-2.6167	2.13209	-2.56158	5.55087	-1.82692	0.861261	-0.0565709	0.307804	0.375719
22	1.01748	0.40171	0.559021	-2.01746	0.766797	1.43766	-0.10392	1.42984	0.765453	0.122759	0.32083	0.956518	-0.248163	-0.0693409	0.669022	0.136717	0.258004	0.729989	-0.0959804	1.11095	-1.82692	1.27168	0.198523	-0.606739	-0.444832	-0.484609
23	-0.524998	1.30179	-1.58337	1.90389	-0.501952	-1.32534	1.80154	0.748293	1.71148	-0.348533	-2.06893	-0.347833	0.908286	0.968389	-2.7974	0.837319	-0.914105	-1.65793	0.812419	-0.857912	0.861261	0.198523	2.79985	-1.80853	0.045157	-0.25872
24	-0.389425	-0.872002	0.661693	-0.611774	-0.289274	-0.519167	-1.67068	-0.378237	-2.13469	-0.827474	0.53045	-0.348941	-0.169694	-0.648648	0.110772	-1.16654	0.320226	0.0562237	-1.20074	0.0287856	-0.0565709	-0.606739	-1.80853	1.91332	-0.189826	0.388807
25	0.0892027	0.091798	-0.361609	0.618583	-0.743321	0.793979	1.13477	-0.840719	0.933644	0.628109	-0.0864351	-0.505264	-0.542064	0.743106	0.997333	0.504961	0.264979	0.0641627	0.476945	0.315398	0.307804	-0.444832	0.045157	-0.189826	0.780129	0.332707
26	-0.307467	-0.0756696	-0.145232	0.588983	-0.433961	-0.134503	0.261041	-0.43833	-0.145581	-0.0577593	-0.0788729	-0.515719	-0.0955987	0.244529	0.0346445	0.0387362	0.0956602	-0.31537	-0.0631884	-0.0661723	0.375719	-0.484609	-0.25872	0.388807	0.332707	0.299987
27-dimensional	37.4097	7.798	-1.96138	0.933535	-5.54359	-9.45093	-1.20627	-1.32531	-1.68205	-3.48512	-10.4633	-0.25213	0.11993	-4.8667	-0.960739	2.85634	-1.60901	-3.9441	1.59377	0.989913	1.75297	-2.30736	0.33563	-1.02534	0.127729	-0.197366	-0.171024
2	7.798	34.0063	-1.97525	-5.25495	3.8319	-4.95468	-0.49266	3.40274	3.22995	0.404017	5.1963	1.5696	1.62473	0.463266	-0.439496	-2.84574	-1.65661	-5.52566	0.261677	-0.106961	1.85547	0.316019	-2.34076	0.098151	0.312172	-1.2012	-0.442537
3	-1.96138	-1.97525	34.4286	10.6297	-0.475352	4.49063	-0.519381	5.45445	6.75402	2.3999	-1.42287	0.607384	0.451516	-2.93906	1.97408	-4.09622	1.05487	3.92969	-2.02875	1.08795	-1.17793	-1.89938	-0.519669	3.411	-1.77075	-1.09994	-1.12192
4	0.933535	-5.25495	10.6297	32.4511	-3.05866	13.3859	-1.16135	1.00306	-0.831351	-0.166299	-2.03691	-2.48528	0.245524	-3.38222	1.08609	2.82602	3.01974	-1.19014	-0.0315572	-0.336689	-0.869041	-0.403055	0.330182	-0.287062	-0.609371	-1.84239	-0.111191
5	-5.54359	3.8319	-0.475352	-3.05866	15.1028	-0.691647	0.792675	4.83142	0.990308	-1.47786	6.28303	1.03432	-0.655257	3.84556	-2.19637	-4.6979	-3.79746	-4.9532	3.02986	-3.21683	2.49318	4.75927	-3.07559	1.78601	0.837383	0.145614	0.441913
6	-9.45093	-4.95468	4.49063	13.3859	-0.691647	31.8546	-0.959598	-4.92446	-0.0645142	1.65196	-0.930053	-6.18797	2.43801	6.79472	2.4324	2.23457	3.00332	3.13495	-3.57058	1.50146	-1.33107	-2.30573	0.36967	0.777304	-0.880864	-0.450908	-0.762508
7	-1.20627	-0.49266	-0.519381	-1.16135	0.792675	-0.959598	4.6484	-1.41607	-1.37808	0.38138	-1.82738	5.37705	-0.738423	-0.835746	-0.192	-4.38003	-0.572193	1.81273	-0.600601	-2.16813	-1.14999	2.0171	0.0654063	-0.877782	0.920938	0.202288	0.543024
8	-1.32531	3.40274	5.45445	1.00306	4.83142	-4.92446	-1.41607	15.7872	2.01107	3.32171	2.03763	3.7041	-4.56248	-4.37281	0.0605947	-2.87102	-0.414908	-3.48983	0.693957	-0.654689	1.64096	4.00695	-2.88977	1.98608	-0.176451	-0.826944	0.0553434
9	-1.68205	3.22995	6.75402	-0.831351	0.990308	-0.0645142	-1.37808	2.01107	8.89759	2.24174	1.15769	0.483745	0.365603	2.68003	1.03437	-1.88976	1.1866	1.18765	-1.80406	1.16932	-0.62557	-4.58585	-0.0787666	1.55354	-1.40691	-1.16012	-0.775587
10	-3.48512	0.404017	2.3999	-0.166299	-1.47786	1.65196	0.38138	3.32171	2.24174	10.1072	1.57555	4.56526	-2.76217	-0.826756	-0.160706	-1.91103	2.35135	2.83137	-0.888225	1.46041	-2.30216	2.80802	-0.899855	1.02316	-0.464887	0.0620778	-0.153363
11	-10.4633	5.1963	-1.42287	-2.03691	6.28303	-0.930053	-1.82738	2.03763	1.15769	1.57555	20.9952	-2.61736	-1.79997	3.47913	-1.93595	0.116348	3.45697	-4.70628	3.92719	-0.154289	-0.138635	2.96383	-0.786904	-0.400847	0.938419	0.431561	-0.136227
12	-0.25213	1.5696	0.607384	-2.48528	1.03432	-6.18797	5.37705	3.7041	0.483745	4.56526	-2.61736	19.9957	-2.44284	-4.8246	0.59906	-4.39056	-1.18925	4.2774	-1.13912	-3.47446	0.0922794	4.39668	-0.414235	0.0932544	0.893635	-0.0195672	0.956592
13	0.11993	1.62473	0.451516	0.245524	-0.655257	2.43801	-0.738423	-4.56248	0.365603	-2.76217	-1.79997	-2.44284	8.57569	1.97486	-0.446826	-0.0110368	-1.6008	0.124909	-1.23072	0.302622	-0.366233	-2.00039	-0.719309	0.254252	-0.207195	-1.06198	-0.54077
14	-4.8667	0.463266	-2.93906	-3.38222	3.84556	6.79472	-0.835746	-4.37281	2.68003	-0.826756	3.47913	-4.8246	1.97486	15.4964	0.417248	-0.625326	0.396478	1.72735	-0.450284	0.149879	0.00894848	-1.55472	0.347453	0.0513307	-0.38234	-0.277708	-0.389365
15	-0.960739	-0.439496	1.97408	1.08609	-2.19637	2.4324	-0.192	0.0605947	1.03437	-0.160706	-1.93595	0.59906	-0.446826	0.417248	5.81544	-0.354409	2.13046	-1.57983	-4.41265	0.900017	-0.860736	-3.07502	1.52181	1.06145	-0.942903	0.648955	-0.319469
16	2.85634	-2.84574	-4.09622	2.82602	-4.6979	2.23457	-4.38003	-2.87102	-1.88976	-1.91103	0.116348	-4.39056	-0.0110368	-0.625326	-0.354409	11.8895	0.0914481	1.60053	0.493322	1.34481	2.30159	-3.89587	1.36394	-1.06779	-0.762905	-1.26208	-0.261436
17	-1.60901	-1.65661	1.05487	3.01974	-3.79746	3.00332	-0.572193	-0.414908	1.1866	2.35135	3.45697	-1.18925	-1.6008	0.396478	2.13046	0.0914481	11.0245	-2.72934	-0.535222	0.932852	-5.2555	-1.28281	1.57915	0.491836	-0.476829	0.64227	-0.245855
18	-3.9441	-5.52566	3.92969	-1.19014	-4.9532	3.13495	1.81273	-3.48983	1.18765	2.83137	-4.70628	4.2774	0.124909	1.72735	-1.57983	1.60053	-2.72934	18.5435	-1.31348	0.84573	1.65101	-0.272438	1.65302	-0.871205	-0.380384	-0.273794	0.122755
19	1.59377	0.261677	-2.02875	-0.0315572	3.02986	-3.57058	-0.600601	0.693957	-1.80406	-0.888225	3.92719	-1.13912	-1.23072	-0.450284	-4.41265	0.493322	-0.535222	-1.31348	5.62059	-0.803162	1.19224	4.43707	-1.0665	-0.311876	0.820522	0.462739	0.494773
20	0.989913	-0.106961	1.08795	-0.336689	-3.21683	1.50146	-2.16813	-0.654689	1.16932	1.46041	-0.154289	-3.47446	0.302622	0.149879	0.900017	1.34481	0.932852	0.84573	-0.803162	5.67251	-0.390094	-1.84055	0.598634	0.75517	-1.08999	0.557489	-0.638794
21	1.75297	1.85547	-1.17793	-0.869041	2.49318	-1.33107	-1.14999	1.64096	-0.62557	-2.30216	-0.138635	0.0922794	-0.366233	0.00894848	-0.860736	2.30159	-5.2555	1.65101	1.19224	-0.390094	5.34012	1.12159	-1.01968	0.139918	0.188405	-0.136682	0.159987
22	-2.30736	0.316019	-1.89938	-0.403055	4.75927	-2.30573	2.0171	4.00695	-4.58585	2.80802	2.96383	4.39668	-2.00039	-1.55472	-3.07502	-3.89587	-1.28281	-0.272438	4.43707	-1.84055	1.12159	10.8256	-2.61612	1.01863	1.26005	1.47656	0.970108
23	0.33563	-2.34076	-0.519669	0.330182	-3.07559	0.36967	0.0654063	-2.88977	-0.0787666	-0.899855	-0.786904	-0.414235	-0.719309	0.347453	1.52181	1.36394	1.57915	1.65302	-1.0665	0.598634	-1.01968	-2.61612	2.17079	-0.838226	-0.217098	0.579859	0.00598355
24	-1.02534	0.098151	3.411	-0.287062	1.78601	0.777304	-0.877782	1.98608	1.55354	1.02316	-0.400847	0.0932544	0.254252	0.0513307	1.06145	-1.06779	0.491836	-0.871205	-0.311876	0.75517	0.139918	1.01863	-0.838226	2.85997	-0.867297	0.788228	-0.17882
25	0.127729	0.312172	-1.77075	-0.609371	0.837383	-0.880864	0.920938	-0.176451	-1.40691	-0.464887	0.938419	0.893635	-0.207195	-0.38234	-0.942903	-0.762905	-0.476829	-0.380384	0.820522	-1.08999	0.188405	1.26005	-0.217098	-0.867297	0.748421	0.121465	0.241381
26	-0.197366	-1.2012	-1.09994	-1.84239	0.145614	-0.450908	0.202288	-0.826944	-1.16012	0.0620778	0.431561	-0.0195672	-1.06198	-0.277708	0.648955	-1.26208	0.64227	-0.273794	0.462739	0.557489	-0.136682	1.47656	0.579859	0.788228	0.121465	2.19581	0.213457
27	-0.171024	-0.442537	-1.12192	-0.111191	0.441913	-0.762508	0.543024	0.0553434	-0.775587	-0.153363	-0.136227	0.956592	-0.54077	-0.389365	-0.319469	-0.261436	-0.245855	0.122755	0.494773	-0.638794	0.159987	0.970108	0.00598355	-0.17882	0.241381	0.213457	0.265465
28-dimensional	27.263	-0.503802	-4.32921	-7.255	-2.04563	-0.845943	0.516308	-0.115447	-1.02573	-0.0837116	-2.12954	1.14055	0.929656	0.745197	0.550212	0.796275	-1.38349	-3.75418	-1.16425	-0.540864	0.186063	-0.530136	0.736835	-1.34424	-0.286818	0.0317426	-0.634823	0.0581957
2	-0.503802	44.4142	3.71154	-3.03596	-7.54526	-7.3845	1.3356	-4.48719	0.572189	-1.37313	-9.30598	1.99957	-3.10054	-0.791904	-2.19504	2.84862	0.120401	-7.0041	-3.16561	-3.14771	0.857644	-1.5967	-0.505186	-2.38086	-3.2756	-2.26309	-1.17212	-0.0642928
3	-4.32921	3.71154	33.3838	7.40612	-2.11201	3.40832	0.844964	-0.247495	1.78964	0.540759	-8.85918	8.73298	0.794544	2.51482	0.619344	1.78489	1.01606	-2.5692	-2.35718	-1.04944	2.21926	-0.670015	-0.642901	-2.72977	-2.58706	-0.249675	-0.452589	-0.0573855
4	-7.255	-3.03596	7.40612	25.998	-2.28719	2.11092	6.36652	3.4245	-1.12626	0.411057	-2.66947	0.375711	-4.73599	0.41696	-1.91003	1.3419	2.03526	-2.35388	1.77936	-1.46731	-1.0899	-0.078333	-0.534506	-1.19446	-3.02891	-0.0771554	-0.160581	0.0984383
5	-2.04563	-7.54526	-2.11201	-2.28719	16.8474	3.71863	-2.14173	0.253268	-3.18258	3.25376	5.93108	2.25911	-1.94425	3.30501	2.89883	-0.907235	-0.500762	3.17246	0.957065	-0.334571	3.85501	-2.40605	3.00235	1.60998	-0.310108	-2.46024	1.14815	-0.545091
6	-0.845943	-7.3845	3.40832	2.11092	3.71863	27.9879	2.644	1.80781	3.65415	-2.77374	-0.531996	4.97156	-1.02219	-8.39411	-1.9603	-1.9396	-1.87537	-1.44193	-2.06753	0.111581	0.598111	1.12191	-0.169063	0.483879	-2.1941	-1.45415	1.59427	-0.309439
7	0.516308	1.3356	0.844964	6.36652	-2.14173	2.644	14.6879	1.46565	-4.08914	-1.93324	-1.35164	-1.31262	-0.727481	1.83932	-3.27663	0.184109	-0.157191	-3.53448	-2.42578	-1.52511	-0.192898	-1.4632	-1.0543	-2.10486	-3.6112	-0.727689	-1.00182	0.183629
8	-0.115447	-4.48719	-0.247495	3.4245	0.253268	1.80781	1.46565	16.7103	-0.828021	1.81252	3.01841	-0.026851	-2.73837	-7.23626	4.34352	-2.237	-0.470643	3.24888	2.14179	-0.226596	-0.488658	0.0501378	0.941356	-2.39061	0.935014	0.354419	-0.85459	0.144375
9	-1.02573	0.572189	1.78964	-1.12626	-3.18258	3.65415	-4.08914	-0.828021	9.78832	-2.20354	-3.74127	2.85176	0.0351983	-4.45717	0.325877	-2.41254	0.644938	-0.286732	0.258417	0.967065	-0.966479	3.55036	0.416585	1.89332	0.0541934	0.149344	2.03389	-0.194972
10	-0.0837116	-1.37313	0.540759	0.411057	3.25376	-2.77374	-1.93324	1.81252	-2.20354	9.96937	1.0729	1.21066	-1.35336	5.67972	1.03114	0.976062	-0.488049	-0.846506	0.126307	-0.786672	-1.6532	-0.680744	-0.355852	-1.10518	0.899133	-0.400105	-0.923414	0.28758
11	-2.12954	-9.30598	-8.85918	-2.66947	5.93108	-0.531996	-1.35164	3.01841	-3.74127	1.0729	17.7171	-2.10675	5.09711	-2.15868	-3.12763	-1.5181	0.604049	1.68088	-1.19515	0.973708	1.70597	2.75314	-2.05763	2.37187	3.33786	-0.262493	-0.0946084	-0.13694
12	1.14055	1.99957	8.73298	0.375711	2.25911	4.97156	-1.31262	-0.026851	2.85176	1.21066	-2.10675	16.5093	0.0569315	1.02168	1.87449	0.219785	0.898528	-6.67155	-2.70057	-0.405087	2.67922	1.55564	1.91982	0.209942	-1.2433	-1.29059	1.28792	-0.354547
13	0.929656	-3.10054	0.794544	-4.73599	-1.94425	-1.02219	-0.727481	-2.73837	0.0351983	-1.35336	5.09711	0.0569315	12.6063	1.68094	-3.31616	-1.14003	-0.356368	-1.11766	-2.93544	0.864399	-0.216311	2.10584	-3.12743	0.360299	2.87245	1.54926	-0.586097	0.166293
14	0.745197	-0.791904	2.51482	0.41696	3.30501	-8.39411	1.83932	-7.23626	-4.45717	5.67972	-2.15868	1.02168	1.68094	20.0543	-1.717	2.41823	1.24463	-4.05144	-0.294975	-0.986825	0.0281371	-0.564008	-0.0347386	0.50135	0.265127	1.85334	-0.638303	0.361137
15	0.550212	-2.19504	0.619344	-1.91003	2.89883	-1.9603	-3.27663	4.34352	0.325877	1.03114	-3.12763	1.87449	-3.31616	-1.717	12.6456	0.605065	-0.00175399	1.19716	2.19439	1.18927	2.3306	-3.00776	6.26231	-1.92372	0.463358	2.89031	1.06171	0.0109778
16	0.796275	2.84862	1.78489	1.3419	-0.907235	-1.9396	0.184109	-2.237	-2.41254	0.976062	-1.5181	0.219785	-1.14003	2.41823	0.605065	4.96908	0.252773	-2.78203	-1.38775	1.28227	-1.784	-1.24937	-1.42561	-1.67924	-0.426933	1.72576	-0.633664	0.285696
17	-1.38349	0.120401	1.01606	2.03526	-0.500762	-1.87537	-0.157191	-0.470643	0.644938	-0.488049	0.604049	0.898528	-0.356368	1.24463	-0.00175399	0.252773	6.92001	-3.63836	1.95398	0.638548	0.914106	0.0451228	-0.260752	0.926943	2.30831	0.971082	-0.889491	0.307965
18	-3.75418	-7.0041	-2.5692	-2.35388	3.17246	-1.44193	-3.53448	3.24888	-0.286732	-0.846506	1.68088	-6.67155	-1.11766	-4.05144	1.19716	-2.78203	-3.63836	16.1351	3.37012	1.17835	0.425728	-2.08192	0.235411	1.7696	0.84968	-1.37272	0.638462	-0.266844
19	-1.16425	-3.16561	-2.35718	1.77936	0.957065	-2.06753	-2.42578	2.14179	0.258417	0.126307	-1.19515	-2.70057	-2.93544	-0.294975	2.19439	-1.38775	1.95398	3.37012	5.98713	-0.473748	-0.219735	-0.79948	2.4652	1.53957	1.49497	0.241753	0.120446	0.066891
20	-0.540864	-3.14771	-1.04944	-1.46731	-0.334571	0.111581	-1.52511	-0.226596	0.967065	-0.786672	0.973708	-0.405087	0.864399	-0.986825	1.18927	1.28227	0.638548	1.17835	-0.473748	5.04569	-1.28862	-0.277774	-1.48724	-0.247015	1.85979	2.61255	0.119841	0.282954
21	0.186063	0.857644	2.21926	-1.0899	3.85501	0.598111	-0.192898	-0.488658	-0.966479	-1.6532	1.70597	2.67922	-0.216311	0.0281371	2.3306	-1.784	0.914106	0.425728	-0.219735	-1.28862	7.5877	-1.10094	4.099	1.20396	-0.877122	-1.39078	0.753428	-0.471339
22	-0.530136	-1.5967	-0.670015	-0.078333	-2.40605	1.12191	-1.4632	0.0501378	3.55036	-0.680744	2.75314	1.55564	2.10584	-0.564008	-3.00776	-1.24937	0.0451228	-2.08192	-0.79948	-0.277774	-1.10094	5.80072	-1.52911	0.945084	0.0673883	0.271901	0.496621	-0.110782
23	0.736835	-0.505186	-0.642901	-0.534506	3.00235	-0.169063	-1.0543	0.941356	0.416585	-0.355852	-2.05763	1.91982	-3.12743	-0.0347386	6.26231	-1.42561	-0.260752	0.235411	2.4652	-1.48724	4.099	-1.52911	6.35577	0.992818	-0.958204	-0.214297	1.56204	-0.326466
24	-1.34424	-2.38086	-2.72977	-1.19446	1.60998	0.483879	-2.10486	-2.39061	1.89332	-1.10518	2.37187	0.209942	0.360299	0.50135	-1.92372	-1.67924	0.926943	1.7696	1.53957	-0.247015	1.20396	0.945084	0.992818	3.93227	1.10555	-0.997969	1.30251	-0.178893
25	-0.286818	-3.2756	-2.58706	-3.02891	-0.310108	-2.1941	-3.6112	0.935014	0.0541934	0.899133	3.33786	-1.2433	2.87245	0.265127	0.463358	-0.426933	2.30831	0.84968	1.49497	1.85979	-0.877122	0.0673883	-0.958204	1.10555	4.5071	1.96533	-0.859271	0.450438
26	0.0317426	-2.26309	-0.249675	-0.0771554	-2.46024	-1.45415	-0.727689	0.354419	0.149344	-0.400105	-0.262493	-1.29059	1.54926	1.85334	2.89031	1.72576	0.971082	-1.37272	0.241753	2.61255	-1.39078	0.271901	-0.214297	-0.997969	1.96533	5.06509	0.0447331	0.48765
27	-0.634823	-1.17212	-0.452589	-0.160581	1.14815	1.59427	-1.00182	-0.85459	2.03389	-0.923414	-0.0946084	1.28792	-0.586097	-0.638303	1.06171	-0.633664	-0.889491	0.638462	0.120446	0.119841	0.753428	0.496621	1.56204	1.30251	-0.859271	0.0447331	1.64388	-0.259812
28	0.0581957	-0.0642928	-0.0573855	0.0984383	-0.545091	-0.309439	0.183629	0.144375	-0.194972	0.28758	-0.13694	-0.354547	0.166293	0.361137	0.0109778	0.285696	0.307965	-0.266844	0.066891	0.282954	-0.471339	-0.110782	-0.326466	-0.178893	0.450438	0.48765	-0.259812	0.126391
29-dimensional	34.3278	-0.553276	2.43413	3.2378	2.85303	6.79215	0.223528	2.84014	-0.494738	0.597086	0.90374	1.55201	2.58789	-1.25059	4.1763	-0.757823	3.67673	1.21996	4.78616	2.14118	-0.306074	1.79699	-1.47415	1.61033	-0.728287	2.15232	-0.392158	-0.668168	0.064925
2	-0.553276	28.9695	-1.98952	0.407473	-0.205128	2.40507	0.193435	2.48492	5.62985	1.44934	-2.1435	-7.40552	0.416328	5.31505	-1.93643	-0.926599	-1.57298	0.172384	-6.08292	0.916386	0.997736	-0.686666	0.116838	-0.123083	0.46356	0.121565	-0.16761	-0.178419	-0.0440928
3	2.43413	-1.98952	24.649	5.74942	-2.38697	-2.2611	-2.77638	-6.19234	1.0032	-0.395275	-1.94893	13.8254	1.38735	-6.83429	-4.20097	0.279582	0.623463	0.838979	-3.49468	-2.98634	1.87879	0.875578	2.83679	2.25503	2.33392	1.31731	-0.120943	-0.360981	-0.0175132
4	3.2378	0.407473	5.74942	17.8405	3.29616	2.15464	3.02126	5.87833	-1.4684	1.79776	-0.233738	1.48892	-3.61407	0.304265	1.80846	-1.20266	2.26866	-0.707548	5.02143	1.06273	-1.00067	2.92945	2.11172	-1.77651	-0.672449	1.46722	0.32247	-0.411825	0.0604519
5	2.85303	-0.205128	-2.38697	3.29616	12.6679	1.73887	4.3624	7.08625	2.42488	-2.53912	5.11265	-1.01266	-1.01518	3.90367	1.20045	-2.4325	3.41078	2.86367	5.10485	1.5143	1.16479	1.16011	0.930376	-2.31681	-0.767989	0.916588	0.960079	-0.480679	-0.0218684
6	6.79215	2.40507	-2.2611	2.15464	1.73887	19.9059	3.11354	-1.36242	0.476523	1.32478	7.17388	1.88045	-0.571439	0.672965	1.18227	-3.42853	-0.438095	-0.988038	3.27103	0.707464	-0.652826	1.4552	1.95056	-1.51872	-1.36525	0.00905258	0.898639	0.157544	0.0472265
7	0.223528	0.193435	-2.77638	3.02126	4.3624	3.11354	9.32386	1.77713	2.16605	2.12819	1.70008	-2.62845	-4.69601	5.10383	0.192505	-2.87534	2.49649	0.0645439	2.29884	0.67428	-1.79149	3.11662	4.42926	-1.38248	-1.10995	0.532094	1.55221	-0.443166	-0.08342
8	2.84014	2.48492	-6.19234	5.87833	7.08625	-1.36242	1.77713	17.712	-2.03358	-0.336227	2.79522	-4.99392	-2.01964	2.81744	4.27594	-0.845007	1.0583	4.57902	5.78638	3.13285	-1.33966	-1.09394	-1.87969	-2.98591	-1.77536	-0.668293	-0.17084	0.103478	-0.0224842
9	-0.494738	5.62985	1.0032	-1.4684	2.42488	0.476523	2.16605	-2.03358	9.68689	0.492226	0.229882	-1.52361	-0.364184	2.92006	-1.08131	-2.25801	3.02154	-1.2766	-5.67752	0.094482	0.0524295	2.13672	1.13586	-0.685418	1.35519	2.23252	0.18137	-0.690819	0.0112159
10	0.597086	1.44934	-0.395275	1.79776	-2.53912	1.32478	2.12819	-0.336227	0.492226	11.1775	2.2332	-0.990953	-4.75773	5.4383	1.33789	2.2571	-1.08424	-2.74369	-0.685179	0.74698	-2.8971	2.34448	1.53811	1.18085	-0.245716	0.729695	-0.246945	-0.313867	0.00764131
11	0.90374	-2.1435	-1.94893	-0.233738	5.11265	7.17388	1.70008	2.79522	0.229882	2.2332	28.5104	0.839391	3.19892	-3.6111	3.29225	-3.21848	-1.62697	-1.69537	5.46829	3.81597	-2.07253	-2.58056	0.169237	-1.53484	-2.45715	-2.09455	-0.0994541	1.05154	0.0215448
12	1.55201	-7.40552	13.8254	1.48892	-1.01266	1.88045	-2.62845	-4.99392	-1.52361	-0.990953	0.839391	28.769	-0.900525	-5.97344	-0.554623	0.565627	2.06435	-1.85911	1.08777	0.33505	-0.237677	0.500423	1.01145	-0.347664	-0.53704	-0.137165	0.137918	-0.19158	-0.0614244
13	2.58789	0.416328	1.38735	-3.61407	-1.01518	-0.571439	-4.69601	-2.01964	-0.364184	-4.75773	3.19892	-0.900525	12.8524	-6.90338	-0.750729	0.692752	-0.647046	-1.17635	-2.97754	1.14009	0.825194	-1.73668	-2.23918	1.87772	-0.251904	-0.518129	-0.47799	0.0377988	-0.0603678
14	-1.25059	5.31505	-6.83429	0.304265	3.90367	0.672965	5.10383	2.81744	2.92006	5.4383	-3.6111	-5.97344	-6.90338	19.1881	-0.0082853	1.95779	0.799959	1.19139	3.78369	-0.927496	1.05894	3.48807	4.32907	-1.13617	-0.116133	2.29879	1.28462	-0.989316	-0.0145967
15	4.1763	-1.93643	-4.20097	1.80846	1.20045	1.18227	0.192505	4.27594	-1.08131	1.33789	3.29225	-0.554623	-0.750729	-0.0082853	7.63324	1.24635	2.21513	1.62992	4.7256	3.71052	-3.41155	0.0424363	-2.92158	-0.593514	-1.49352	0.735863	-0.885106	-0.229779	0.0400773
16	-0.757823	-0.926599	0.279582	-1.20266	-2.4325	-3.42853	-2.87534	-0.845007	-2.25801	2.2571	-3.21848	0.565627	0.692752	1.95779	1.24635	11.1867	-1.12652	-3.65979	-2.13692	2.97498	-1.96296	0.48419	-1.36604	1.90643	-0.289687	1.30063	-1.30703	-0.447896	0.00967855
17	3.67673	-1.57298	0.623463	2.26866	3.41078	-0.438095	2.49649	1.0583	3.02154	-1.08424	-1.62697	2.06435	-0.647046	0.799959	2.21513	-1.12652	13.0662	-0.458029	1.22617	2.53327	-2.10968	2.66159	-0.293816	-0.989072	-0.438101	2.48647	-0.454723	-0.926533	-0.0151229
18	1.21996	0.172384	0.838979	-0.707548	2.86367	-0.988038	0.0645439	4.57902	-1.2766	-2.74369	-1.69537	-1.85911	-1.17635	1.19139	1.62992	-3.65979	-0.458029	16.9714	4.05638	-0.488801	0.924761	-0.998316	-0.142241	-2.29671	-0.350454	-1.06228	0.77237	0.065645	-0.043141
19	4.78616	-6.08292	-3.49468	5.02143	5.10485	3.27103	2.29884	5.78638	-5.67752	-0.685179	5.46829	1.08777	-2.97754	3.78369	4.7256	-2.13692	1.22617	4.05638	14.4777	0.849336	0.800451	0.689041	1.17951	-1.72333	-1.65782	0.332465	0.887329	-0.128372	0.0384369
20	2.14118	0.916386	-2.98634	1.06273	1.5143	0.707464	0.67428	3.13285	0.094482	0.74698	3.81597	0.33505	1.14009	-0.927496	3.71052	2.97498	2.53327	-0.488801	0.849336	6.89005	-3.03861	0.350655	-2.01082	-0.652007	-1.82935	1.03714	-0.620423	-0.260943	-0.0248207
21	-0.306074	0.997736	1.87879	-1.00067	1.16479	-0.652826	-1.79149	-1.33966	0.0524295	-2.8971	-2.07253	-0.237677	0.825194	1.05894	-3.41155	-1.96296	-2.10968	0.924761	0.800451	-3.03861	4.68076	-0.756075	0.472846	0.587953	1.19474	0.0327059	0.48248	0.104747	0.0473644
22	1.79699	-0.686666	0.875578	2.92945	1.16011	1.4552	3.11662	-1.09394	2.13672	2.34448	-2.58056	0.500423	-1.73668	3.48807	0.0424363	0.48419	2.66159	-0.998316	0.689041	0.350655	-0.756075	4.17848	2.57267	-0.274577	0.282523	2.53222	0.638662	-0.771029	0.0444662
23	-1.47415	0.116838	2.83679	2.11172	0.930376	1.95056	4.42926	-1.87969	1.13586	1.53811	0.169237	1.01145	-2.23918	4.32907	-2.92158	-1.36604	-0.293816	-0.142241	1.17951	-2.01082	0.472846	2.57267	7.07237	-0.822298	0.579049	0.877535	1.45763	-0.38414	-0.0520321
24	1.61033	-0.123083	2.25503	-1.77651	-2.31681	-1.51872	-1.38248	-2.98591	-0.685418	1.18085	-1.53484	-0.347664	1.87772	-1.13617	-0.593514	1.90643	-0.989072	-2.29671	-1.72333	-0.652007	0.587953	-0.274577	-0.822298	3.25086	0.735891	0.344309	-0.661067	-0.00939416	0.0427891
25	-0.728287	0.46356	2.33392	-0.672449	-0.767989	-1.36525	-1.10995	-1.77536	1.35519	-0.245716	-2.45715	-0.53704	-0.251904	-0.116133	-1.49352	-0.289687	-0.438101	-0.350454	-1.65782	-1.82935	1.19474	0.282523	0.579049	0.735891	1.79233	0.861197	-0.117284	-0.0298984	0.0698437
26	2.15232	0.121565	1.31731	1.46722	0.916588	0.00905258	0.532094	-0.668293	2.23252	0.729695	-2.09455	-0.137165	-0.518129	2.29879	0.735863	1.30063	2.48647	-1.06228	0.332465	1.03714	0.0327059	2.53222	0.877535	0.344309	0.861197	2.97135	-0.0968959	-0.612177	0.0945216
27	-0.392158	-0.16761	-0.120943	0.32247	0.960079	0.898639	1.55221	-0.17084	0.18137	-0.246945	-0.0994541	0.137918	-0.47799	1.28462	-0.885106	-1.30703	-0.454723	0.77237	0.887329	-0.620423	0.48248	0.638662	1.45763	-0.661067	-0.117284	-0.0968959	0.750155	-0.0744166	-0.0381699
28	-0.668168	-0.178419	-0.360981	-0.411825	-0.480679	0.157544	-0.443166	0.103478	-0.690819	-0.313867	1.05154	-0.19158	0.0377988	-0.989316	-0.229779	-0.447896	-0.926533	0.065645	-0.128372	-0.260943	0.104747	-0.771029	-0.38414	-0.00939416	-0.0298984	-0.612177	-0.0744166	0.305165	0.0172245
29	0.064925	-0.0440928	-0.0175132	0.0604519	-0.0218684	0.0472265	-0.08342	-0.0224842	0.0112159	0.00764131	0.0215448	-0.0614244	-0.0603678	-0.0145967	0.0400773	0.00967855	-0.0151229	-0.043141	0.0384369	-0.0248207	0.0473644	0.0444662	-0.0520321	0.0427891	0.0698437	0.0945216	-0.0381699	0.0172245	0.0146696
30-dimensional	43.9996	7.02078	0.464677	-5.46931	0.828832	4.24573	1.257	3.44852	-1.49067	0.0324289	2.45564	1.63546	-1.4481	4.58154	0.628814	0.916252	-0.941742	-7.52228	4.22913	-2.47768	-3.25737	-2.03098	1.14262	-1.38935	-2.81553	-1.81527	0.6716	0.790362	-0.271587	0.135076
2	7.02078	29.3264	0.129806	-4.42364	-0.223713	-3.3954	-2.0621	-0.896294	0.490362	0.89914	-1.83308	1.62364	0.983066	3.83565	-0.779103	1.03599	0.665005	0.706931	1.53933	2.2187	-0.288157	-0.611296	0.508371	-2.59733	0.125938	-0.0658396	-2.84757	0.169885	-0.00654894	-0.0118404
3	0.464677	0.129806	21.7694	3.87728	2.35476	-4.17512	3.193	-0.758528	3.54004	-0.312578	0.330757	-8.85832	-0.289175	-8.17927	-0.715	1.94477	-0.61193	0.0591534	-1.32949	0.932681	2.42171	2.04871	-2.04748	-0.530646	-2.68518	1.16655	2.5583	-2.55564	-0.214699	0.0110511
4	-5.46931	-4.42364	3.87728	25.998	3.46688	6.03478	1.8802	1.17857	-1.5244	-3.31523	-2.86122	-7.4094	1.16571	-9.66646	0.754843	4.47994	-0.572338	2.19188	4.41154	-0.588377	0.907754	2.90344	-1.91799	1.65939	0.931172	-0.730305	4.50225	-1.77803	-0.0577594	0.0812011
5	0.828832	-0.223713	2.35476	3.46688	10.602	3.32073	-1.21521	-1.90218	-0.283395	-0.038606	-0.216597	0.953738	-2.07336	-2.82012	0.073992	1.39852	2.36524	0.727123	2.89662	0.858888	0.933869	1.91839	-1.63343	0.215516	-0.219051	-0.0367892	-0.213224	-0.337185	-0.144791	0.0273767
6	4.24573	-3.3954	-4.17512	6.03478	3.32073	29.5953	6.34337	2.91301	-5.48708	-2.01518	-0.0667432	3.77069	-3.71579	-6.16916	3.67043	-2.07833	-1.16898	-2.23689	3.05686	-3.82943	0.889552	-4.20138	0.535798	0.0541118	-0.27065	-1.04216	3.11091	1.30053	-0.10973	0.0201846
7	1.257	-2.0621	3.193	1.8802	-1.21521	6.34337	16.661	4.1068	1.61792	1.09704	-0.822279	-7.29628	-0.579098	-5.31142	3.89183	-6.47399	3.99143	0.373377	2.79787	-2.42416	1.90098	-3.50849	2.94933	-2.69432	0.473668	-2.56404	-0.930707	3.40048	-0.0194983	-0.0411925
8	3.44852	-0.896294	-0.758528	1.17857	-1.90218	2.91301	4.1068	9.50554	-1.00589	0.381876	0.0127971	0.896302	1.1341	2.20172	2.90341	-3.28525	0.820334	-1.28672	4.7077	1.04108	2.85963	-0.317667	2.20179	-2.00657	-0.570171	-0.858916	-0.571672	0.989233	-0.0365047	0.0227121
9	-1.49067	0.490362	3.54004	-1.5244	-0.283395	-5.48708	1.61792	-1.00589	9.36583	2.4948	5.70449	-5.93518	-1.24848	-4.16444	-2.71243	-0.954304	3.152	2.17857	-3.40261	1.05049	1.18447	1.03608	-2.13338	0.735689	0.349006	0.0823223	-0.734056	-0.958962	-0.0166589	0.0181901
10	0.0324289	0.89914	-0.312578	-3.31523	-0.038606	-2.01518	1.09704	0.381876	2.4948	7.66958	-1.2402	3.92951	2.36117	-0.935574	-0.219535	-4.98459	4.48469	2.04024	0.0104745	0.976455	0.357893	1.71229	0.88007	-0.984358	1.74242	-0.457779	-1.39978	0.468142	0.00374707	0.011165
11	2.45564	-1.83308	0.330757	-2.86122	-0.216597	-0.0667432	-0.822279	0.0127971	5.70449	-1.2402	20.7907	-0.819086	-6.48135	-1.70815	-1.03983	4.87309	-2.39477	0.116207	1.71032	-2.49585	0.697949	-3.72019	-3.65862	2.16358	-0.569317	-0.756981	-0.10022	-0.239845	-0.107265	0.0578844
12	1.63546	1.62364	-8.85832	-7.4094	0.953738	3.77069	-7.29628	0.896302	-5.93518	3.92951	-0.819086	23.2187	-0.553603	11.5061	2.41089	-3.02814	2.0139	0.0493587	4.63011	-0.620456	3.02944	-0.678359	1.46562	1.11756	0.50103	0.082731	-2.76739	1.39937	0.364269	-0.137454
13	-1.4481	0.983066	-0.289175	1.16571	-2.07336	-3.71579	-0.579098	1.1341	-1.24848	2.36117	-6.48135	-0.553603	12.9182	2.7869	-1.08168	-1.20489	1.06282	0.348065	-1.93869	2.79511	0.35601	4.93055	1.01326	-0.277223	-0.636039	0.861548	-0.215028	-0.363017	0.301778	-0.0507908
14	4.58154	3.83565	-8.17927	-9.66646	-2.82012	-6.16916	-5.31142	2.20172	-4.16444	-0.935574	-1.70815	11.5061	2.7869	31.6637	1.54846	-1.66239	1.83525	-5.88825	-0.559846	0.20064	0.503821	-2.35373	3.98427	-3.07576	-4.32513	-1.17025	-3.29826	2.69229	0.0528075	-0.0227921
15	0.628814	-0.779103	-0.715	0.754843	0.073992	3.67043	3.89183	2.90341	-2.71243	-0.219535	-1.03983	2.41089	-1.08168	1.54846	6.75604	-0.866018	0.684033	-0.422635	4.66359	-1.81924	1.25983	0.0888127	4.74275	-0.393673	0.756954	-0.307192	-0.768918	1.30349	-0.126907	-0.0128091
16	0.916252	1.03599	1.94477	4.47994	1.39852	-2.07833	-6.47399	-3.28525	-0.954304	-4.98459	4.87309	-3.02814	-1.20489	-1.66239	-0.866018	16.3875	-4.73548	-1.8425	4.36003	-0.178743	-2.48106	1.11758	-2.80218	1.25693	-1.25311	0.951231	1.42384	-2.15076	0.00405359	-0.0839012
17	-0.941742	0.665005	-0.61193	-0.572338	2.36524	-1.16898	3.99143	0.820334	3.152	4.48469	-2.39477	2.0139	1.06282	1.83525	0.684033	-4.73548	11.6234	3.18572	2.41557	0.797835	2.45735	1.12397	-0.30877	-0.27682	2.80541	-1.27511	-3.3764	2.38338	-0.00739182	-0.058858
18	-7.52228	0.706931	0.0591534	2.19188	0.727123	-2.23689	0.373377	-1.28672	2.17857	2.04024	0.116207	0.0493587	0.348065	-5.88825	-0.422635	-1.8425	3.18572	10.3222	0.477525	0.579051	-0.0127851	1.12559	-0.0147674	0.869985	4.82817	-0.341596	-2.39994	0.898544	0.241474	-0.0957821
19	4.22913	1.53933	-1.32949	4.41154	2.89662	3.05686	2.79787	4.7077	-3.40261	0.0104745	1.71032	4.63011	-1.93869	-0.559846	4.66359	4.36003	2.41557	0.477525	16.0854	0.480798	2.05599	-0.209116	1.14764	-1.74158	1.51471	-2.45435	-3.3476	1.72957	-0.167446	-0.0525762
20	-2.47768	2.2187	0.932681	-0.588377	0.858888	-3.82943	-2.42416	1.04108	1.05049	0.976455	-2.49585	-0.620456	2.79511	0.20064	-1.81924	-0.178743	0.797835	0.579051	0.480798	7.18057	2.29074	2.634	-0.322221	-2.8143	-1.13922	1.40833	-1.18136	-1.3614	-0.0157555	0.00807191
21	-3.25737	-0.288157	2.42171	0.907754	0.933869	0.889552	1.90098	2.85963	1.18447	0.357893	0.697949	3.02944	0.35601	0.503821	1.25983	-2.48106	2.45735	-0.0127851	2.05599	2.29074	8.65692	0.979811	-1.0294	0.979998	-2.22903	1.15658	-1.74001	-0.760208	0.221825	-0.111338
22	-2.03098	-0.611296	2.04871	2.90344	1.91839	-4.20138	-3.50849	-0.317667	1.03608	1.71229	-3.72019	-0.678359	4.93055	-2.35373	0.0888127	1.11758	1.12397	1.12559	-0.209116	2.634	0.979811	7.47188	0.574672	2.41196	-0.015675	1.25738	0.430807	-1.77871	0.0442096	-0.0297794
23	1.14262	0.508371	-2.04748	-1.91799	-1.63343	0.535798	2.94933	2.20179	-2.13338	0.88007	-3.65862	1.46562	1.01326	3.98427	4.74275	-2.80218	-0.30877	-0.0147674	1.14764	-0.322221	-1.0294	0.574672	8.63845	-1.16314	-0.024415	-0.550193	-1.34174	1.38527	0.134327	0.0177678
24	-1.38935	-2.59733	-0.530646	1.65939	0.215516	0.0541118	-2.69432	-2.00657	0.735689	-0.984358	2.16358	1.11756	-0.277223	-3.07576	-0.393673	1.25693	-0.27682	0.869985	-1.74158	-2.8143	0.979998	2.41196	-1.16314	7.2234	0.831839	0.412744	0.0467063	-0.809516	0.217309	-0.0387831
25	-2.81553	0.125938	-2.68518	0.931172	-0.219051	-0.27065	0.473668	-0.570171	0.349006	1.74242	-0.569317	0.50103	-0.636039	-4.32513	0.756954	-1.25311	2.80541	4.82817	1.51471	-1.13922	-2.22903	-0.015675	-0.024415	0.831839	5.64638	-0.803549	-0.704193	1.40853	0.0810958	-0.00950719
26	-1.81527	-0.0658396	1.16655	-0.730305	-0.0367892	-1.04216	-2.56404	-0.858916	0.0823223	-0.457779	-0.756981	0.082731	0.861548	-1.17025	-0.307192	0.951231	-1.27511	-0.341596	-2.45435	1.40833	1.15658	1.25738	-0.550193	0.412744	-0.803549	2.64384	1.20755	-1.70183	0.0964647	-0.0849464
27	0.6716	-2.84757	2.5583	4.50225	-0.213224	3.11091	-0.930707	-0.571672	-0.734056	-1.39978	-0.10022	-2.76739	-0.215028	-3.29826	-0.768918	1.42384	-3.3764	-2.39994	-3.3476	-1.18136	-1.74001	0.430807	-1.34174	0.0467063	-0.704193	1.20755	7.37874	-2.0522	0.0327195	0.0115771
28	0.790362	0.169885	-2.55564	-1.77803	-0.337185	1.30053	3.40048	0.989233	-0.958962	0.468142	-0.239845	1.39937	-0.363017	2.69229	1.30349	-2.15076	2.38338	0.898544	1.72957	-1.3614	-0.760208	-1.77871	1.38527	-0.809516	1.40853	-1.70183	-2.0522	2.57281	0.0570674	-0.0202334
29	-0.271587	-0.00654894	-0.214699	-0.0577594	-0.144791	-0.10973	-0.0194983	-0.0365047	-0.0166589	0.00374707	-0.107265	0.364269	0.301778	0.0528075	-0.126907	0.00405359	-0.00739182	0.241474	-0.167446	-0.0157555	0.221825	0.0442096	0.134327	0.217309	0.0810958	0.0964647	0.0327195	0.0570674	0.11956	-0.0292098
30	0.135076	-0.0118404	0.0110511	0.0812011	0.0273767	0.0201846	-0.0411925	0.0227121	0.0181901	0.011165	0.0578844	-0.137454	-0.0507908	-0.0227921	-0.0128091	-0.0839012	-0.058858	-0.0957821	-0.0525762	0.00807191	-0.111338	-0.0297794	0.0177678	-0.0387831	-0.00950719	-0.0849464	0.0115771	-0.0202334	-0.0292098	0.0194842
31-dimensional	37.8795	1.04257	-1.5839	-3.94053	1.43963	4.36187	0.250808	-5.09964	-3.49185	-2.99931	-4.26159	-1.89106	-8.76175	-2.2398	-1.91126	-0.0427553	-0.547397	-6.65381	0.87731	-1.99888	1.10543	0.383658	-5.37995	0.554174	0.516362	-0.0096496	0.799092	-1.37001	0.0153811	0.184662	-0.246791
2	1.04257	37.2025	4.93292	-5.62783	-1.17892	3.94153	0.541676	-5.83568	-3.92406	-7.65239	0.558101	-2.08585	-0.387356	0.730254	-2.68673	-3.27912	-0.769354	-0.944181	-3.59695	2.31296	0.781833	-1.03525	-1.27496	-1.21174	2.37384	-0.743761	-0.230092	-1.33282	0.0752542	0.0177727	0.529592
3	-1.5839	4.93292	22.1877	-1.80886	0.178534	-1.77553	0.700038	-2.37668	3.98025	-4.64684	0.782096	-6.22094	3.64171	8.23032	0.988123	-1.1448	0.523095	3.66547	-3.52617	1.51669	1.58032	3.19049	-1.68288	0.897676	2.30461	-2.57687	-3.47697	-3.11061	0.106086	-0.151788	-0.443223
4	-3.94053	-5.62783	-1.80886	21.68	1.85848	2.81477	2.99386	-0.614188	-0.791939	4.34062	0.540889	2.70626	-1.68518	-1.97968	-0.051615	-0.0812064	2.31784	-2.0531	3.69799	2.78821	-0.940928	0.769827	-1.09003	-1.42224	-2.66218	1.46215	1.82031	-1.22437	-0.177008	-0.00731548	-1.26548
5	1.43963	-1.17892	0.178534	1.85848	19.932	4.56308	5.15576	1.26324	1.67065	-1.0863	9.83493	-5.878	-2.83386	5.83766	-0.849037	0.263687	1.19983	0.577129	4.3902	2.01379	-0.61824	1.60462	-3.54962	-1.09348	-2.48145	1.4426	1.3285	-1.9973	-0.0456008	0.221712	-0.0913897
6	4.36187	3.94153	-1.77553	2.81477	4.56308	15.4353	-0.904255	-3.6677	-1.87722	-2.65377	3.2976	-1.6293	-3.668	0.324231	-1.87866	-1.7394	-0.947659	-1.61578	-0.213758	1.96347	-0.620899	-0.223467	-3.62021	0.894505	-1.02574	2.00039	3.07066	-1.16362	-0.123588	-0.0770761	0.0402074
7	0.250808	0.541676	0.700038	2.99386	5.15576	-0.904255	14.4291	1.4582	-0.975739	0.809818	4.93647	-2.33832	-0.35765	-0.634037	0.0989086	3.37238	4.59936	-1.15669	2.8891	2.60617	-0.553448	0.823536	4.57214	0.983209	1.65199	-1.68029	-3.4947	-2.25113	-0.175116	-1.25787	1.76141
8	-5.09964	-5.83568	-2.37668	-0.614188	1.26324	-3.6677	1.4582	20.3033	-0.984428	2.11448	7.76935	-0.692946	0.192659	4.70778	-1.2624	-2.1322	-0.231163	3.659	0.983	2.33992	3.54945	1.84442	4.25038	-2.20347	0.204824	-1.57761	-2.06595	-0.747775	0.282086	1.16461	-2.08709
9	-3.49185	-3.92406	3.98025	-0.791939	1.67065	-1.87722	-0.975739	-0.984428	15.5459	1.67773	2.16934	2.76638	4.81963	8.76529	3.98423	3.00641	2.26338	-2.17938	-2.70219	-3.79971	-1.86404	-1.53005	0.190735	1.27954	-0.281998	0.196478	-0.756307	2.29984	-0.27974	-0.416469	0.188212
10	-2.99931	-7.65239	-4.64684	4.34062	-1.0863	-2.65377	0.809818	2.11448	1.67773	13.7389	-3.66928	2.93388	1.73264	-0.502225	1.36123	4.26995	-2.33705	-4.58397	4.32616	0.943722	0.652661	0.979627	1.05081	-2.32397	-4.92114	1.37169	1.00366	1.33448	0.128534	0.663935	-1.13767
11	-4.26159	0.558101	0.782096	0.540889	9.83493	3.2976	4.93647	7.76935	2.16934	-3.66928	21.1864	-3.48899	6.50414	7.65246	-0.756865	-1.06835	2.47792	10.8346	-3.17214	5.57534	-1.384	0.997664	1.37221	0.296371	1.49454	0.0597039	-0.44959	-3.2739	0.105264	0.289277	-0.560669
12	-1.89106	-2.08585	-6.22094	2.70626	-5.878	-1.6293	-2.33832	-0.692946	2.76638	2.93388	-3.48899	18.0382	1.85948	-0.91521	0.98819	-0.490094	-0.782049	-4.68376	1.10378	-4.1816	-1.06919	-4.10479	1.89318	-1.42098	0.145303	1.60625	2.27488	4.88641	0.049154	-0.356133	1.15622
13	-8.76175	-0.387356	3.64171	-1.68518	-2.83386	-3.668	-0.35765	0.192659	4.81963	1.73264	6.50414	1.85948	20.8418	4.12712	3.33571	-0.27681	0.520523	11.8199	-3.64599	1.60741	-0.548633	-2.29711	5.14834	-1.50935	0.550605	-1.11319	-2.21697	-0.366883	0.155937	-0.286792	0.541392
14	-2.2398	0.730254	8.23032	-1.97968	5.83766	0.324231	-0.634037	4.70778	8.76529	-0.502225	7.65246	-0.91521	4.12712	21.7486	-0.459342	-1.17584	-3.83917	3.53318	-6.43698	2.18969	2.96883	2.37477	-0.192152	-1.61588	-1.39878	0.299262	0.852185	-0.720457	0.0503016	0.560404	-1.37621
15	-1.91126	-2.68673	0.988123	-0.051615	-0.849037	-1.87866	0.0989086	-1.2624	3.98423	1.36123	-0.756865	0.98819	3.33571	-0.459342	4.14991	0.403989	1.43687	-2.1683	-1.14254	-2.57591	-1.58538	-1.27969	0.874666	-0.50819	-0.214131	0.0318644	-1.44401	1.11063	-0.0376214	-0.411146	0.546447
16	-0.0427553	-3.27912	-1.1448	-0.0812064	0.263687	-1.7394	3.37238	-2.1322	3.00641	4.26995	-1.06835	-0.490094	-0.27681	-1.17584	0.403989	9.09943	-0.166856	0.857816	4.20918	-1.62657	-0.341499	0.904711	1.04001	0.289686	0.0368434	-0.155634	-0.799725	1.12456	-0.0100748	-0.164115	0.301737
17	-0.547397	-0.769354	0.523095	2.31784	1.19983	-0.947659	4.59936	-0.231163	2.26338	-2.33705	2.47792	-0.782049	0.520523	-3.83917	1.43687	-0.166856	8.78093	0.364685	-0.540469	-1.67859	-2.30377	-1.90546	1.61604	2.72775	3.42852	0.513638	-1.5061	-1.02141	-0.143795	-0.80605	1.48792
18	-6.65381	-0.944181	3.66547	-2.0531	0.577129	-1.61578	-1.15669	3.659	-2.17938	-4.58397	10.8346	-4.68376	11.8199	3.53318	-2.1683	0.857816	0.364685	26.8302	-0.615103	4.87074	1.26179	3.02932	3.19012	0.19439	2.99086	-1.48434	-2.7411	-3.30242	-0.0256218	0.394047	-0.449974
19	0.87731	-3.59695	-3.52617	3.69799	4.3902	-0.213758	2.8891	0.983	-2.70219	4.32616	-3.17214	1.10378	-3.64599	-6.43698	-1.14254	4.20918	-0.540469	-0.615103	14.407	-1.01031	0.765988	1.68486	-2.14861	-2.2933	-2.24717	0.429412	0.175499	0.836831	-0.0131786	-0.0848581	0.282077
20	-1.99888	2.31296	1.51669	2.78821	2.01379	1.96347	2.60617	2.33992	-3.79971	0.943722	5.57534	-4.1816	1.60741	2.18969	-2.57591	-1.62657	-1.67859	4.87074	-1.01031	9.90367	0.33655	4.1715	-0.0320089	-0.394944	-1.42783	-1.06072	-0.263542	-3.7051	0.196991	0.816556	-1.3497
21	1.10543	0.781833	1.58032	-0.940928	-0.61824	-0.620899	-0.553448	3.54945	-1.86404	0.652661	-1.384	-1.06919	-0.548633	2.96883	-1.58538	-0.341499	-2.30377	1.26179	0.765988	0.33655	5.0198	0.639224	-0.0913715	-0.539735	-0.605764	-0.501075	-0.732437	-1.40299	-0.0396308	0.174379	-0.630434
22	0.383658	-1.03525	3.19049	0.769827	1.60462	-0.223467	0.823536	1.84442	-1.53005	0.979627	0.997664	-4.10479	-2.29711	2.37477	-1.27969	0.904711	-1.90546	3.02932	1.68486	4.1715	0.639224	7.73138	-3.86658	-0.758427	-1.08718	-1.56027	-2.00132	-2.99818	0.218825	1.0498	-1.26821
23	-5.37995	-1.27496	-1.68288	-1.09003	-3.54962	-3.62021	4.57214	4.25038	0.190735	1.05081	1.37221	1.89318	5.14834	-0.192152	0.874666	1.04001	1.61604	3.19012	-2.14861	-0.0320089	-0.0913715	-3.86658	12.4734	-1.05435	2.13235	-0.392152	-2.57048	2.73346	-0.133719	-0.551149	0.938281
24	0.554174	-1.21174	0.897676	-1.42224	-1.09348	0.894505	0.983209	-2.20347	1.27954	-2.32397	0.296371	-1.42098	-1.50935	-1.61588	-0.50819	0.289686	2.72775	0.19439	-2.2933	-0.394944	-0.539735	-0.758427	-1.05435	5.92044	1.97308	-0.644267	0.19912	-1.52474	-0.16377	-0.766915	1.14683
25	0.516362	2.37384	2.30461	-2.66218	-2.48145	-1.02574	1.65199	0.204824	-0.281998	-4.92114	1.49454	0.145303	0.550605	-1.39878	-0.214131	0.0368434	3.42852	2.99086	-2.24717	-1.42783	-0.605764	-1.08718	2.13235	1.97308	5.24586	-1.46947	-1.9999	-0.0919826	0.206983	-0.324687	1.0079
26	-0.0096496	-0.743761	-2.57687	1.46215	1.4426	2.00039	-1.68029	-1.57761	0.196478	1.37169	0.0597039	1.60625	-1.11319	0.299262	0.0318644	-0.155634	0.513638	-1.48434	0.429412	-1.06072	-0.501075	-1.56027	-0.392152	-0.644267	-1.46947	3.42894	2.98969	1.27147	-0.0962458	-0.0839398	0.530286
27	0.799092	-0.230092	-3.47697	1.82031	1.3285	3.07066	-3.4947	-2.06595	-0.756307	1.00366	-0.44959	2.27488	-2.21697	0.852185	-1.44401	-0.799725	-1.5061	-2.7411	0.175499	-0.263542	-0.732437	-2.00132	-2.57048	0.19912	-1.9999	2.98969	6.23636	1.73577	-0.0763295	-0.363724	-0.00537775
28	-1.37001	-1.33282	-3.11061	-1.22437	-1.9973	-1.16362	-2.25113	-0.747775	2.29984	1.33448	-3.2739	4.88641	-0.366883	-0.720457	1.11063	1.12456	-1.02141	-3.30242	0.836831	-3.7051	-1.40299	-2.99818	2.73346	-1.52474	-0.0919826	1.27147	1.73577	4.69635	-0.0931845	-0.523337	0.826505
29	0.0153811	0.0752542	0.106086	-0.177008	-0.0456008	-0.123588	-0.175116	0.282086	-0.27974	0.128534	0.105264	0.049154	0.155937	0.0503016	-0.0376214	-0.0100748	-0.143795	-0.0256218	-0.0131786	0.196991	-0.0396308	0.218825	-0.133719	-0.16377	0.206983	-0.0962458	-0.0763295	-0.0931845	0.151031	0.299797	-0.177388
30	0.184662	0.0177727	-0.151788	-0.00731548	0.221712	-0.0770761	-1.25787	1.16461	-0.416469	0.663935	0.289277	-0.356133	-0.286792	0.560404	-0.411146	-0.164115	-0.80605	0.394047	-0.0848581	0.816556	0.174379	1.0498	-0.551149	-0.766915	-0.324687	-0.0839398	-0.363724	-0.523337	0.299797	1.16479	-1.11015
31	-0.246791	0.529592	-0.443223	-1.26548	-0.0913897	0.0402074	1.76141	-2.08709	0.188212	-1.13767	-0.560669	1.15622	0.541392	-1.37621	0.546447	0.301737	1.48792	-0.449974	0.282077	-1.3497	-0.630434	-1.26821	0.938281	1.14683	1.0079	0.530286	-0.00537775	0.826505	-0.177388	-1.11015	2.0447
32-dimensional	31.6585	0.927211	-0.402619	-0.604706	-0.687948	0.305979	3.40385	3.00951	-2.19013	0.425359	7.69356	2.49917	-0.0492456	1.58021	-1.18527	-0.628768	-2.48697	-3.24697	-0.913552	-0.829153	-0.54218	-0.989269	0.294273	3.94921	-3.18934	-1.38258	-1.30979	2.1926	-1.22196	0.704639	-0.793981	-1.56855
2	0.927211	39.3474	-5.85324	5.12868	0.803444	-2.984	3.11516	-0.58524	6.31096	2.53118	-10.1014	-9.98066	-1.1113	0.900996	1.60649	-3.89748	-0.214843	0.729306	6.39594	3.25399	-2.38037	-0.539444	-1.59535	-4.61818	2.98672	0.488072	1.13873	1.78753	1.18066	-0.902831	0.962059	1.51525
3	-0.402619	-5.85324	28.2531	-4.12302	2.23666	-3.26068	-2.98205	1.10052	-1.81844	-2.41313	1.31848	1.91117	-1.22341	-7.96693	2.58925	1.50027	0.88939	1.00875	-2.9364	-1.82711	1.62212	2.41133	4.84086	4.44113	3.47402	1.85904	2.70495	1.50935	0.46707	-0.41513	0.40271	2.26606
4	-0.604706	5.12868	-4.12302	26.7431	-0.264358	-2.83023	1.64858	-0.82327	0.37179	7.06474	-7.7596	3.80076	3.50122	-7.90171	-3.39523	-0.387704	-2.05836	-6.08881	-3.46207	-1.32186	-2.4452	0.908949	-2.17303	2.82692	3.18995	-1.02883	-1.33372	-1.12427	0.0652046	0.151503	-0.0867534	-1.17995
5	-0.687948	0.803444	2.23666	-0.264358	11.8008	2.21817	1.98148	4.58242	-0.130774	-0.985679	-2.93989	-2.14619	0.15815	0.340941	-1.9075	-1.29895	-6.07895	1.72158	-3.75101	1.29701	1.89708	-0.340968	0.171932	-1.43706	0.961026	0.825998	1.36467	1.07284	0.174559	0.00739265	0.14049	0.0599442
6	0.305979	-2.984	-3.26068	-2.83023	2.21817	19.6311	2.65227	4.83538	0.222709	0.605601	-0.254688	-0.369902	1.88491	3.4545	0.282548	-1.3665	1.54937	-3.78362	0.920584	-0.075096	2.01844	-1.77949	-0.381444	-0.460774	-2.84297	2.04933	1.86877	0.34016	-0.876904	0.0407171	-0.227466	0.861733
7	3.40385	3.11516	-2.98205	1.64858	1.98148	2.65227	9.71703	3.26929	-0.437582	-0.240563	3.01667	-0.894125	1.66771	4.13714	-0.738388	2.81393	-2.99709	-0.139787	-0.505243	0.542326	-0.789445	-0.672106	-2.99718	-0.8837	1.36638	0.202696	0.42446	1.73652	-0.234769	0.389939	-0.127663	0.146427
8	3.00951	-0.58524	1.10052	-0.82327	4.58242	4.83538	3.26929	18.24	-0.611915	-0.381678	-0.20325	-2.17788	-1.01058	2.59627	-3.30977	-5.745	-5.1692	-4.65007	-4.72368	2.00983	2.48898	0.102085	1.04698	-3.07791	-2.51311	0.646193	-0.0192196	2.31541	0.314269	-0.0613213	0.348595	0.89699
9	-2.19013	6.31096	-1.81844	0.37179	-0.130774	0.222709	-0.437582	-0.611915	6.80177	0.988807	-5.82061	-1.85165	-2.45332	1.16384	1.86453	-2.67304	-1.70714	1.46277	2.03263	2.27383	-1.31404	-0.826285	0.815764	-3.23706	-1.40435	1.09565	1.40095	2.42325	0.360728	-0.432238	0.325763	1.22381
10	0.425359	2.53118	-2.41313	7.06474	-0.985679	0.605601	-0.240563	-0.381678	0.988807	13.8056	-7.10005	5.81239	2.87412	-4.10556	-5.68393	-4.46065	-1.56793	-8.00519	-0.851775	-2.96047	-1.34645	-1.35057	-1.9171	7.51574	0.828742	-0.859126	-0.663306	-0.0416019	0.751936	-0.150298	0.214741	-1.84184
11	7.69356	-10.1014	1.31848	-7.7596	-2.93989	-0.254688	3.01667	-0.20325	-5.82061	-7.10005	30.2776	1.67179	-1.25339	1.80995	3.63984	8.82268	-2.06146	7.12483	0.812044	1.65845	-2.64566	1.38772	1.12352	-2.13769	1.32241	-0.249231	-1.10612	1.1934	-0.13968	0.206578	0.0151612	0.832364
12	2.49917	-9.98066	1.91117	3.80076	-2.14619	-0.369902	-0.894125	-2.17788	-1.85165	5.81239	1.67179	19.7947	2.53971	-4.29237	-3.14503	6.26347	0.389013	0.0383039	-5.19113	-5.82651	2.73857	-1.95631	-0.77183	8.00465	-0.35315	-0.467474	0.260311	-2.37787	-0.493638	0.184171	-0.277479	-0.300149
13	-0.0492456	-1.1113	-1.22341	3.50122	0.15815	1.88491	1.66771	-1.01058	-2.45332	2.87412	-1.25339	2.53971	13.7193	-2.61331	-1.03543	4.65666	1.89886	-4.31665	3.36703	-1.15044	-0.655943	2.5246	-3.67733	3.45454	0.981555	2.16015	3.00781	-3.1807	-1.01274	0.619021	-0.556432	-1.15547
14	1.58021	0.900996	-7.96693	-7.90171	0.340941	3.4545	4.13714	2.59627	1.16384	-4.10556	1.80995	-4.29237	-2.61331	20.9903	-0.362027	-3.28313	-0.951465	-2.39193	1.21337	2.53953	1.29899	0.104843	-1.12643	-4.40453	-3.36893	1.88972	1.87592	-0.630264	-0.886241	0.0550015	-0.230828	0.393163
15	-1.18527	1.60649	2.58925	-3.39523	-1.9075	0.282548	-0.738388	-3.30977	1.86453	-5.68393	3.63984	-3.14503	-1.03543	-0.362027	12.6002	4.3693	7.0052	5.93065	1.77613	0.509854	-1.70613	0.114928	4.73721	-1.28107	1.40978	3.19903	2.10232	1.44072	-1.84153	0.734115	-0.600179	1.58705
16	-0.628768	-3.89748	1.50027	-0.387704	-1.29895	-1.3665	2.81393	-5.745	-2.67304	-4.46065	8.82268	6.26347	4.65666	-3.28313	4.3693	23.1465	5.2009	11.1235	3.44503	-2.40118	-2.89585	0.552778	-0.483751	3.42109	4.12878	-0.67331	-1.39213	-1.60558	-0.0601086	-0.303329	0.220952	1.0143
17	-2.48697	-0.214843	0.88939	-2.05836	-6.07895	1.54937	-2.99709	-5.1692	-1.70714	-1.56793	-2.06146	0.389013	1.89886	-0.951465	7.0052	5.2009	15.439	-0.657102	6.18153	-3.92489	0.2177	-0.151066	1.85542	5.4849	-1.33493	-0.101219	-1.43593	-2.36417	-1.5201	0.79647	-0.726884	-0.0561288
18	-3.24697	0.729306	1.00875	-6.08881	1.72158	-3.78362	-0.139787	-4.65007	1.46277	-8.00519	7.12483	0.0383039	-4.31665	-2.39193	5.93065	11.1235	-0.657102	19.9009	1.50476	2.36209	-0.4079	-3.10796	1.15234	-6.4516	3.2894	-1.58818	-1.03508	1.74544	1.13435	-0.962138	0.853651	2.0429
19	-0.913552	6.39594	-2.9364	-3.46207	-3.75101	0.920584	-0.505243	-4.72368	2.03263	-0.851775	0.812044	-5.19113	3.36703	1.21337	1.77613	3.44503	6.18153	1.50476	16.2554	-0.979024	-1.82335	2.05627	-3.14464	2.94176	-3.67201	-1.22408	-0.702766	0.0495749	0.361998	-0.0732922	0.143222	-0.0522839
20	-0.829153	3.25399	-1.82711	-1.32186	1.29701	-0.075096	0.542326	2.00983	2.27383	-2.96047	1.65845	-5.82651	-1.15044	2.53953	0.509854	-2.40118	-3.92489	2.36209	-0.979024	10.0716	-2.45297	1.02047	2.07602	-8.34326	0.0175037	1.07351	0.521798	2.41155	0.635226	-0.197175	0.392019	0.7562
21	-0.54218	-2.38037	1.62212	-2.4452	1.89708	2.01844	-0.789445	2.48898	-1.31404	-1.34645	-2.64566	2.73857	-0.655943	1.29899	-1.70613	-2.89585	0.2177	-0.4079	-1.82335	-2.45297	8.39797	0.531105	0.299432	-0.341272	0.0787152	1.05319	3.3626	-1.98186	-0.300527	0.329941	-0.229738	-0.0834693
22	-0.989269	-0.539444	2.41133	0.908949	-0.340968	-1.77949	-0.672106	0.102085	-0.826285	-1.35057	1.38772	-1.95631	2.5246	0.104843	0.114928	0.552778	-0.151066	-3.10796	2.05627	1.02047	0.531105	7.98013	0.299012	0.876516	3.21098	2.57072	2.45304	-0.81618	-0.753133	0.384074	-0.466296	-0.565941
23	0.294273	-1.59535	4.84086	-2.17303	0.171932	-0.381444	-2.99718	1.04698	0.815764	-1.9171	1.12352	-0.77183	-3.67733	-1.12643	4.73721	-0.483751	1.85542	1.15234	-3.14464	2.07602	0.299432	0.299012	9.35253	0.451252	1.19414	-0.165232	-0.432302	3.1869	0.180853	-0.129801	0.093018	0.622068
24	3.94921	-4.61818	4.44113	2.82692	-1.43706	-0.460774	-0.8837	-3.07791	-3.23706	7.51574	-2.13769	8.00465	3.45454	-4.40453	-1.28107	3.42109	5.4849	-6.4516	2.94176	-8.34326	-0.341272	0.876516	0.451252	19.6649	0.780673	1.04652	1.27578	0.0448229	-0.841943	0.816605	-0.757716	-1.65594
25	-3.18934	2.98672	3.47402	3.18995	0.961026	-2.84297	1.36638	-2.51311	-1.40435	0.828742	1.32241	-0.35315	0.981555	-3.36893	1.40978	4.12878	-1.33493	3.2894	-3.67201	0.0175037	0.0787152	3.21098	1.19414	0.780673	11.8554	2.95884	4.1244	-0.139007	0.54926	-0.812655	0.416615	0.711075
26	-1.38258	0.488072	1.85904	-1.02883	0.825998	2.04933	0.202696	0.646193	1.09565	-0.859126	-0.249231	-0.467474	2.16015	1.88972	3.19903	-0.67331	-0.101219	-1.58818	-1.22408	1.07351	1.05319	2.57072	-0.165232	1.04652	2.95884	7.70094	7.83653	-0.774339	-1.60498	0.42593	-0.49158	1.51486
27	-1.30979	1.13873	2.70495	-1.33372	1.36467	1.86877	0.42446	-0.0192196	1.40095	-0.663306	-1.10612	0.260311	3.00781	1.87592	2.10232	-1.39213	-1.43593	-1.03508	-0.702766	0.521798	3.3626	2.45304	-0.432302	1.27578	4.1244	7.83653	10.9198	-0.110355	-0.731528	0.123878	-0.132369	1.89623
28	2.1926	1.78753	1.50935	-1.12427	1.07284	0.34016	1.73652	2.31541	2.42325	-0.0416019	1.1934	-2.37787	-3.1807	-0.630264	1.44072	-1.60558	-2.36417	1.74544	0.0495749	2.41155	-1.98186	-0.81618	3.1869	0.0448229	-0.139007	-0.774339	-0.110355	5.95995	1.0035	-0.265447	0.349912	0.620788
29	-1.22196	1.18066	0.46707	0.0652046	0.174559	-0.876904	-0.234769	0.314269	0.360728	0.751936	-0.13968	-0.493638	-1.01274	-0.886241	-1.84153	-0.0601086	-1.5201	1.13435	0.361998	0.635226	-0.300527	-0.753133	0.180853	-0.841943	0.54926	-1.60498	-0.731528	1.0035	1.61346	-0.576075	0.747398	0.451386
30	0.704639	-0.902831	-0.41513	0.151503	0.00739265	0.0407171	0.389939	-0.0613213	-0.432238	-0.150298	0.206578	0.184171	0.619021	0.0550015	0.734115	-0.303329	0.79647	-0.962138	-0.0732922	-0.197175	0.329941	0.384074	-0.129801	0.816605	-0.812655	0.42593	0.123878	-0.265447	-0.576075	0.671259	-0.392559	-0.522519
31	-0.793981	0.962059	0.40271	-0.0867534	0.14049	-0.227466	-0.127663	0.348595	0.325763	0.214741	0.0151612	-0.277479	-0.556432	-0.230828	-0.600179	0.220952	-0.726884	0.853651	0.143222	0.392019	-0.229738	-0.466296	0.093018	-0.757716	0.416615	-0.49158	-0.132369	0.349912	0.747398	-0.392559	0.440876	0.509029
32	-1.56855	1.51525	2.26606	-1.17995	0.0599442	0.861733	0.146427	0.89699	1.22381	-1.84184	0.832364	-0.300149	-1.15547	0.393163	1.58705	1.0143	-0.0561288	2.0429	-0.0522839	0.7562	-0.0834693	-0.565941	0.622068	-1.65594	0.711075	1.51486	1.89623	0.620788	0.451386	-0.522519	0.509029	2.02993
33-dimensional	49.0595	1.78155	7.21146	8.72185	-5.48254	3.45053	-0.696372	-2.90757	1.35093	3.31672	5.87407	10.6188	0.169782	-8.50339	0.498353	2.38708	-4.25609	4.43059	2.24844	0.96941	-0.197859	1.91186	-1.06578	-2.90857	-0.156701	4.34866	-0.798081	3.34368	0.833632	-1.93997	-1.64807	-0.878277	0.513409
2	1.78155	30.4268	2.45578	0.606688	-0.961917	-3.4051	-1.25312	-6.89346	0.738419	4.41304	0.846379	8.93718	1.69053	-0.65117	-2.68946	-2.82107	1.29902	7.67914	6.64458	-4.00681	-1.21007	1.01881	-0.160644	-1.4186	4.60886	4.35557	-2.30903	1.50836	-0.80669	-2.61964	0.160138	-1.05109	0.0278166
3	7.21146	2.45578	30.4635	4.56617	-3.33884	4.2648	-1.28636	-4.5104	0.714246	-6.52237	-2.13601	-0.41083	-1.96646	-6.59075	-2.89996	4.22011	-1.08038	5.19751	5.24645	0.508163	2.861	2.25433	-4.19622	-2.98842	2.15136	-2.14111	-1.46151	-0.0895116	-2.08069	-0.255119	1.36784	-0.0925102	0.0988004
4	8.72185	0.606688	4.56617	42.8777	-8.33213	1.87898	0.039025	-3.33948	3.66686	1.19447	10.6607	1.99334	-6.93709	3.06668	-4.27285	2.57292	-2.20143	-0.91184	1.17477	-2.93089	-5.8626	-0.190334	-1.83358	-7.12678	2.07416	1.85736	1.12232	0.717277	-1.34093	-8.46531	-0.60454	-3.53741	-0.267875
5	-5.48254	-0.961917	-3.33884	-8.33213	18.7845	2.07052	2.19515	2.21163	1.25352	-0.10445	-3.26705	2.15053	2.85291	0.21164	2.58551	-1.68892	-0.113256	-2.31752	-7.4541	-5.26106	0.0886041	1.26097	3.99395	3.97595	2.78899	-1.2722	-0.636684	1.13844	-0.419141	2.0621	1.39808	0.935264	-0.0057542
6	3.45053	-3.4051	4.2648	1.87898	2.07052	26.0639	-1.63655	-2.22429	-5.54077	1.61969	-2.07738	3.00653	3.52596	-2.75751	0.599994	0.926857	-1.01985	5.12713	0.477457	-0.64825	1.46175	-1.78341	2.36369	2.37527	2.22201	3.09382	-1.43433	0.287101	1.35547	3.62579	-0.867934	1.27174	0.239503
7	-0.696372	-1.25312	-1.28636	0.039025	2.19515	-1.63655	7.38329	4.6748	2.70947	0.573388	-1.01143	-0.767565	-0.623827	-0.463928	-1.25509	-0.505925	0.20795	-1.45246	-4.22817	-0.969276	-1.33336	0.886911	-0.43596	-0.57397	-0.777508	-0.565052	1.47836	0.0517718	-1.47322	-1.72554	0.472609	-1.00809	-0.0895349
8	-2.90757	-6.89346	-4.5104	-3.33948	2.21163	-2.22429	4.6748	22.4667	-2.56015	0.442019	-2.23616	-3.93122	-1.05403	-2.13246	6.96879	-0.852422	1.7563	-7.37461	-1.24428	-0.145131	0.372459	-0.178297	5.34675	2.42645	-2.39898	-4.17974	3.08352	-2.83109	0.907247	2.40423	-0.147174	1.02716	0.0250904
9	1.35093	0.738419	0.714246	3.66686	1.25352	-5.54077	2.70947	-2.56015	11.535	0.00182206	2.62986	2.14185	-2.83826	7.8668	-2.93437	2.33817	0.0637728	-1.23345	-3.52665	-1.2305	-1.67543	2.99006	-2.35836	-2.21146	-2.54793	1.00242	-0.568936	2.43017	-2.23091	-4.747	0.773784	-1.88592	-0.254196
10	3.31672	4.41304	-6.52237	1.19447	-0.10445	1.61969	0.573388	0.442019	0.00182206	12.1346	5.15815	6.92448	-1.8369	-1.6988	-0.115447	-6.58238	1.1267	1.22933	-0.280997	-2.1416	3.56999	-2.79989	1.68061	2.20788	-0.191348	3.82626	-0.425331	1.98505	0.46674	-3.11482	-1.14342	-1.35151	-0.121823
11	5.87407	0.846379	-2.13601	10.6607	-3.26705	-2.07738	-1.01143	-2.23616	2.62986	5.15815	24.2689	4.87829	0.321892	-7.0452	-0.697774	-3.69737	-0.321385	-5.90519	-2.98259	2.50193	-2.0084	-1.28418	-0.569922	0.17326	1.25508	1.36541	0.904806	4.27035	-0.168894	-1.84021	-0.304268	-1.04314	0.447769
12	10.6188	8.93718	-0.41083	1.99334	2.15053	3.00653	-0.767565	-3.93122	2.14185	6.92448	4.87829	30.4695	2.35428	-7.74834	-3.3125	1.83691	1.80909	-1.7468	-2.17175	-0.928274	-1.3203	0.185186	1.27583	-0.128	6.15226	3.71435	-0.983754	2.82763	0.753818	-2.20051	-0.965008	-0.725597	0.394634
13	0.169782	1.69053	-1.96646	-6.93709	2.85291	3.52596	-0.623827	-1.05403	-2.83826	-1.8369	0.321892	2.35428	16.3277	-1.28132	3.18169	3.61476	-1.01511	-0.747428	-1.53464	1.92764	1.74257	0.393692	2.57942	-0.208479	2.98227	-0.0299126	-1.03473	0.312622	1.17614	7.58967	0.964466	3.02361	0.142515
14	-8.50339	-0.65117	-6.59075	3.06668	0.21164	-2.75751	-0.463928	-2.13246	7.8668	-1.6988	-7.0452	-7.74834	-1.28132	36.6158	-5.0846	5.94235	0.152597	1.68422	-0.277776	-0.646219	-0.826717	1.06954	-4.0963	-4.67876	-1.95278	0.178579	-1.05521	0.122868	-1.28562	-5.10005	-0.167325	-1.94273	0.182421
15	0.498353	-2.68946	-2.89996	-4.27285	2.58551	0.599994	-1.25509	6.96879	-2.93437	-0.115447	-0.697774	-3.3125	3.18169	-5.0846	12.9956	-4.80646	-1.86534	-0.193517	1.19151	-2.32361	0.905723	1.13328	6.07741	1.89887	-2.21853	-2.95404	0.661478	-3.51194	2.0747	6.10335	-0.0330478	2.84017	-0.25913
16	2.38708	-2.82107	4.22011	2.57292	-1.68892	0.926857	-0.505925	-0.852422	2.33817	-6.58238	-3.69737	1.83691	3.61476	5.94235	-4.80646	18.0682	-4.95695	-2.70629	-3.84575	4.59327	-2.26647	1.63656	-1.42758	-3.93173	0.397531	2.07377	-1.97074	2.90911	-0.68311	0.218799	-0.180271	-0.348216	0.500675
17	-4.25609	1.29902	-1.08038	-2.20143	-0.113256	-1.01985	0.20795	1.7563	0.0637728	1.1267	-0.321385	1.80909	-1.01511	0.152597	-1.86534	-4.95695	9.21217	-3.24064	3.26166	-2.4591	0.274124	-0.432793	0.157123	1.95079	1.55369	-1.19657	0.901481	-0.678842	-0.402146	0.076019	0.870166	0.151666	-0.173674
18	4.43059	7.67914	5.19751	-0.91184	-2.31752	5.12713	-1.45246	-7.37461	-1.23345	1.22933	-5.90519	-1.7468	-0.747428	1.68422	-0.193517	-2.70629	-3.24064	24.0211	1.36507	-2.33074	3.92995	-0.195331	0.198271	-0.699967	-0.937025	1.40042	-1.03952	-2.05939	0.164367	2.47756	0.476624	1.07381	-0.0414493
19	2.24844	6.64458	5.24645	1.17477	-7.4541	0.477457	-4.22817	-1.24428	-3.52665	-0.280997	-2.98259	-2.17175	-1.53464	-0.277776	1.19151	-3.84575	3.26166	1.36507	17.5914	-0.0818083	2.1944	0.533027	-2.38317	-1.98601	2.58318	1.97765	-0.725954	-0.985023	0.680289	-0.0599643	-0.686982	0.15173	-0.213414
20	0.96941	-4.00681	0.508163	-2.93089	-5.26106	-0.64825	-0.969276	-0.145131	-1.2305	-2.1416	2.50193	-0.928274	1.92764	-0.646219	-2.32361	4.59327	-2.4591	-2.33074	-0.0818083	14.5812	1.57719	0.322292	-5.66953	-0.158848	-1.21897	-1.02852	0.806266	2.96279	0.682909	2.45214	-0.731105	0.823106	0.418473
21	-0.197859	-1.21007	2.861	-5.8626	0.0886041	1.46175	-1.33336	0.372459	-1.67543	3.56999	-2.0084	-1.3203	1.74257	-0.826717	0.905723	-2.26647	0.274124	3.92995	2.1944	1.57719	13.2083	-2.30174	-1.05474	2.90269	-1.65708	-0.0778725	-0.856631	0.595228	1.08637	2.76094	-0.0798535	1.22826	-0.146843
22	1.91186	1.01881	2.25433	-0.190334	1.26097	-1.78341	0.886911	-0.178297	2.99006	-2.79989	-1.28418	0.185186	0.393692	1.06954	1.13328	1.63656	-0.432793	-0.195331	0.533027	0.322292	-2.30174	5.13844	-1.10378	-0.257067	0.835235	-1.52035	0.599157	1.74758	-0.695155	-0.0255982	0.919599	0.152251	-0.0977461
23	-1.06578	-0.160644	-4.19622	-1.83358	3.99395	2.36369	-0.43596	5.34675	-2.35836	1.68061	-0.569922	1.27583	2.57942	-4.0963	6.07741	-1.42758	0.157123	0.198271	-2.38317	-5.66953	-1.05474	-1.10378	7.96814	2.48372	0.98561	0.215233	-0.517984	-1.94505	0.736035	3.25835	0.25038	1.37701	-0.066814
24	-2.90857	-1.4186	-2.98842	-7.12678	3.97595	2.37527	-0.57397	2.42645	-2.21146	2.20788	0.17326	-0.128	-0.208479	-4.67876	1.89887	-3.93173	1.95079	-0.699967	-1.98601	-0.158848	2.90269	-0.257067	2.48372	8.02485	-1.10479	-0.447764	-0.0971591	1.37869	0.535996	2.51943	0.115367	1.17501	0.150533
25	-0.156701	4.60886	2.15136	2.07416	2.78899	2.22201	-0.777508	-2.39898	-2.54793	-0.191348	1.25508	6.15226	2.98227	-1.95278	-2.21853	0.397531	1.55369	-0.937025	2.58318	-1.21897	-1.65708	0.835235	0.98561	-1.10479	10.4629	-0.45429	-0.85273	1.94652	-1.56002	-0.545815	1.07848	-0.35573	0.20779
26	4.34866	4.35557	-2.14111	1.85736	-1.2722	3.09382	-0.565052	-4.17974	1.00242	3.82626	1.36541	3.71435	-0.0299126	0.178579	-2.95404	2.07377	-1.19657	1.40042	1.97765	-1.02852	-0.0778725	-1.52035	0.215233	-0.447764	-0.45429	9.21491	-2.76882	2.94474	1.14615	-1.67333	-1.99986	-0.872411	0.239175
27	-0.798081	-2.30903	-1.46151	1.12232	-0.636684	-1.43433	1.47836	3.08352	-0.568936	-0.425331	0.904806	-0.983754	-1.03473	-1.05521	0.661478	-1.97074	0.901481	-1.03952	-0.725954	0.806266	-0.856631	0.599157	-0.517984	-0.0971591	-0.85273	-2.76882	3.0436	-0.785822	0.409513	0.234249	0.476129	0.12677	-0.253488
28	3.34368	1.50836	-0.0895116	0.717277	1.13844	0.287101	0.0517718	-2.83109	2.43017	1.98505	4.27035	2.82763	0.312622	0.122868	-3.51194	2.90911	-0.678842	-2.05939	-0.985023	2.96279	0.595228	1.74758	-1.94505	1.37869	1.94652	2.94474	-0.785822	6.48221	-0.816664	-2.26299	0.0940692	-1.08195	0.109914
29	0.833632	-0.80669	-2.08069	-1.34093	-0.419141	1.35547	-1.47322	0.907247	-2.23091	0.46674	-0.168894	0.753818	1.17614	-1.28562	2.0747	-0.68311	-0.402146	0.164367	0.680289	0.682909	1.08637	-0.695155	0.736035	0.535996	-1.56002	1.14615	0.409513	-0.816664	2.36333	2.29274	-0.978486	1.08558	0.0452985
30	-1.93997	-2.61964	-0.255119	-8.46531	2.0621	3.62579	-1.72554	2.40423	-4.747	-3.11482	-1.84021	-2.20051	7.58967	-5.10005	6.10335	0.218799	0.076019	2.47756	-0.0599643	2.45214	2.76094	-0.0255982	3.25835	2.51943	-0.545815	-1.67333	0.234249	-2.26299	2.29274	10.6847	0.321292	4.15049	0.31163
31	-1.64807	0.160138	1.36784	-0.60454	1.39808	-0.867934	0.472609	-0.147174	0.773784	-1.14342	-0.304268	-0.965008	0.964466	-0.167325	-0.0330478	-0.180271	0.870166	0.476624	-0.686982	-0.731105	-0.0798535	0.919599	0.25038	0.115367	1.07848	-1.99986	0.476129	0.0940692	-0.978486	0.321292	1.27066	0.156727	-0.267963
32	-0.878277	-1.05109	-0.0925102	-3.53741	0.935264	1.27174	-1.00809	1.02716	-1.88592	-1.35151	-1.04314	-0.725597	3.02361	-1.94273	2.84017	-0.348216	0.151666	1.07381	0.15173	0.823106	1.22826	0.152251	1.37701	1.17501	-0.35573	-0.872411	0.12677	-1.08195	1.08558	4.15049	0.156727	1.74846	0.0528921
33	0.513409	0.0278166	0.0988004	-0.267875	-0.0057542	0.239503	-0.0895349	0.0250904	-0.254196	-0.121823	0.447769	0.394634	0.142515	0.182421	-0.25913	0.500675	-0.173674	-0.0414493	-0.213414	0.418473	-0.146843	-0.0977461	-0.066814	0.150533	0.20779	0.239175	-0.253488	0.109914	0.0452985	0.31163	-0.267963	0.0528921	0.293642
34-dimensional	50.9698	4.63101	3.70729	-1.36896	4.80737	4.78199	-0.171606	2.62369	-0.667881	-3.31495	2.37844	2.88287	1.21875	-5.32278	3.61179	0.104259	0.223797	2.54556	7.41815	-5.1017	3.77143	1.65203	2.80227	-3.07149	-0.36082	0.889337	3.00667	-4.89942	1.43283	1.1653	1.3284	0.169088	-0.0709953	0.123495
2	4.63101	46.9732	0.670158	5.37262	-1.55619	-8.77738	-0.701355	-3.48877	-2.39057	3.03784	-5.67722	-2.4801	1.12453	1.83685	-4.32531	-2.0016	-0.114661	-1.6307	0.35015	2.02355	-2.67451	-2.03699	-2.66551	3.2414	-1.25506	-0.445654	-3.74152	3.22417	-0.77075	-0.928773	0.282916	-0.830497	0.0533553	-0.0305794
3	3.70729	0.670158	19.2658	3.02263	-0.472039	0.00769729	-1.32348	-1.13361	-4.08875	-6.13016	-1.48195	3.46629	-1.97842	-3.21776	2.29708	-0.822772	-1.0198	-2.79323	1.02386	-1.60916	0.611065	0.919482	3.49433	0.998686	0.978453	0.156461	-1.81429	-0.658258	-0.517493	-0.611535	0.535708	0.100604	0.164643	-0.0520951
4	-1.36896	5.37262	3.02263	48.8212	0.396698	-5.3803	-4.00653	-10.6639	-0.987822	9.98929	-9.09323	-5.85785	-2.00509	3.60746	-1.93369	-1.32628	1.74776	-4.38087	6.53639	-2.94451	-5.4143	-2.35561	-4.70567	7.34914	1.34727	3.52925	-2.27929	3.55457	-0.841115	-3.24948	2.69987	-2.24922	-0.413777	0.186564
5	4.80737	-1.55619	-0.472039	0.396698	16.4072	1.26705	-0.566025	-1.25309	-0.317828	-2.74038	5.21718	2.5788	-2.60312	-0.190297	0.631233	-0.981618	0.972079	-0.436291	2.67556	1.98723	-4.24787	-0.537187	1.64322	-1.65934	0.623931	-0.579953	1.47264	0.425064	0.651034	0.0783761	0.961794	0.348232	0.308198	-0.0735194
6	4.78199	-8.77738	0.00769729	-5.3803	1.26705	31.8017	1.10272	-1.73661	-1.20614	-5.11758	4.18656	7.80556	0.288918	-0.916887	0.719903	4.18377	0.515188	-0.833175	1.9066	2.62416	2.52585	-4.35285	-1.68324	0.691088	-0.791662	1.41276	0.19172	-2.60185	-2.29387	0.103827	-3.88596	-0.385956	-0.954166	0.272745
7	-0.171606	-0.701355	-1.32348	-4.00653	-0.566025	1.10272	5.94895	0.21171	1.31349	-1.66884	1.77698	4.05243	1.67693	2.86513	-1.21848	-0.801734	-1.73598	1.04452	-0.913201	1.45265	1.84056	-1.57775	0.189766	-3.46812	0.383251	-1.57721	0.064912	-1.55812	-0.38422	1.47983	-1.39854	0.379965	0.145946	0.0116959
8	2.62369	-3.48877	-1.13361	-10.6639	-1.25309	-1.73661	0.21171	19.6878	1.26354	-3.71198	3.03836	0.778125	1.53203	-2.07995	1.92668	-2.48546	0.842955	0.76454	2.02425	0.757889	7.51662	1.7306	1.24633	-0.239783	0.87213	-0.964623	4.19106	-2.5682	1.28033	1.10727	0.847604	1.15513	0.108646	-0.0454024
9	-0.667881	-2.39057	-4.08875	-0.987822	-0.317828	-1.20614	1.31349	1.26354	14.5456	1.13917	5.84057	-1.78967	0.2959	-2.83355	2.88121	-3.55422	0.396858	4.29348	-4.20623	2.34211	0.651836	0.953792	-3.64146	-1.01807	-1.04642	-1.35318	4.82302	-2.3909	0.410907	0.499793	2.17942	0.649316	0.126924	0.0522459
10	-3.31495	3.03784	-6.13016	9.98929	-2.74038	-5.11758	-1.66884	-3.71198	1.13917	19.752	-4.58117	-8.01446	2.77322	6.79271	-2.25347	3.05405	1.46966	1.58241	0.974504	-4.87018	-4.63884	0.498199	-2.32913	0.679772	2.55745	-0.14751	0.918937	3.42409	0.0348174	-1.54839	1.40143	-1.21971	-0.713575	0.204068
11	2.37844	-5.67722	-1.48195	-9.09323	5.21718	4.18656	1.77698	3.03836	5.84057	-4.58117	20.3643	2.21351	1.9837	-2.26616	3.49296	-2.11233	1.25364	-0.404428	-4.49178	2.78119	-1.90848	-0.83556	4.00434	-4.4121	-1.59014	-2.46361	4.62651	-3.32518	1.01085	1.64909	-1.32312	1.01855	-0.444937	0.108097
12	2.88287	-2.4801	3.46629	-5.85785	2.5788	7.80556	4.05243	0.778125	-1.78967	-8.01446	2.21351	23.5378	2.41951	2.12027	-0.113988	-0.289287	-0.720523	3.18625	0.947368	0.324514	3.3557	-2.72745	2.37848	-4.65379	0.243699	-2.63835	1.38607	-2.19767	-1.03986	1.90069	-1.89145	0.624479	0.272206	0.0595489
13	1.21875	1.12453	-1.97842	-2.00509	-2.60312	0.288918	1.67693	1.53203	0.2959	2.77322	1.9837	2.41951	13.0667	1.17146	-1.98559	0.441433	1.64674	5.59097	-1.98728	2.80139	-2.45756	-2.52819	0.617189	0.968237	-0.573582	-1.36326	-2.52424	-1.3975	-0.318733	0.0158386	-0.833332	-0.185867	-0.512213	0.115922
14	-5.32278	1.83685	-3.21776	3.60746	-0.190297	-0.916887	2.86513	-2.07995	-2.83355	6.79271	-2.26616	2.12027	1.17146	23.0825	-4.7296	0.575376	-1.93787	-3.12805	2.12192	-1.90765	-0.322872	-0.949279	-3.99078	-0.88072	2.23234	-1.57365	-2.9813	6.29342	0.967142	-1.39595	3.58826	-0.705497	0.799748	-0.15314
15	3.61179	-4.32531	2.29708	-1.93369	0.631233	0.719903	-1.21848	1.92668	2.88121	-2.25347	3.49296	-0.113988	-1.98559	-4.7296	13.1	-0.832563	4.74124	-3.40845	-2.15809	-2.30361	-1.23943	4.01633	6.40961	1.20723	0.399429	2.77145	5.11655	-6.43779	0.236323	0.704229	-0.45539	0.713483	-0.136566	0.10726
16	0.104259	-2.0016	-0.822772	-1.32628	-0.981618	4.18377	-0.801734	-2.48546	-3.55422	3.05405	-2.11233	-0.289287	0.441433	0.575376	-0.832563	15.5996	-5.64712	1.40277	-1.44657	-3.75017	0.488543	-2.10578	-1.00501	-4.22888	7.65625	-0.827871	-3.74263	0.0140293	-3.44093	-0.75633	-5.01455	-1.12928	-1.36605	0.3971
17	0.223797	-0.114661	-1.0198	1.74776	0.972079	0.515188	-1.73598	0.842955	0.396858	1.46966	1.25364	-0.720523	1.64674	-1.93787	4.74124	-5.64712	15.7033	3.14097	0.240259	3.62159	-4.79361	-0.686266	0.761681	3.09279	-4.4068	0.676139	4.10827	-3.31052	0.87497	0.546983	1.04531	0.16167	-0.185633	0.122721
18	2.54556	-1.6307	-2.79323	-4.38087	-0.436291	-0.833175	1.04452	0.76454	4.29348	1.58241	-0.404428	3.18625	5.59097	-3.12805	-3.40845	1.40277	3.14097	16.227	-1.52473	1.00921	1.21921	-0.000609434	-1.61498	-4.43101	-4.87688	-3.73097	2.39495	0.15306	0.500598	1.00744	1.36932	0.48834	0.0667189	-0.00338603
19	7.41815	0.35015	1.02386	6.53639	2.67556	1.9066	-0.913201	2.02425	-4.20623	0.974504	-4.49178	0.947368	-1.98728	2.12192	-2.15809	-1.44657	0.240259	-1.52473	13.9881	-2.49779	5.93964	0.51928	-3.55269	3.58066	-1.328	2.43291	2.4908	1.20636	0.593572	-0.556133	1.66348	-0.386477	0.152367	-0.0391461
20	-5.1017	2.02355	-1.60916	-2.94451	1.98723	2.62416	1.45265	0.757889	2.34211	-4.87018	2.78119	0.324514	2.80139	-1.90765	-2.30361	-3.75017	3.62159	1.00921	-2.49779	14.915	-1.5349	-3.99532	-5.09578	3.16956	-0.899631	-2.79688	-0.943446	0.665569	0.217677	0.642434	-0.307466	0.450063	0.294641	-0.0831924
21	3.77143	-2.67451	0.611065	-5.4143	-4.24787	2.52585	1.84056	7.51662	0.651836	-4.63884	-1.90848	3.3557	-2.45756	-0.322872	-1.23943	0.488543	-4.79361	1.21921	5.93964	-1.5349	18.9673	1.78944	-5.91817	-1.01413	0.503043	-0.213414	4.93817	0.141692	2.25874	0.351354	2.96198	0.710872	0.334379	-0.112082
22	1.65203	-2.03699	0.919482	-2.35561	-0.537187	-4.35285	-1.57775	1.7306	0.953792	0.498199	-0.83556	-2.72745	-2.52819	-0.949279	4.01633	-2.10578	-0.686266	-0.000609434	0.51928	-3.99532	1.78944	8.13336	2.35337	0.898885	-2.26052	1.78686	4.13865	-0.528737	2.39975	0.850348	2.89718	0.979943	0.88787	-0.317149
23	2.80227	-2.66551	3.49433	-4.70567	1.64322	-1.68324	0.189766	1.24633	-3.64146	-2.32913	4.00434	2.37848	0.617189	-3.99078	6.40961	-1.00501	0.761681	-1.61498	-3.55269	-5.09578	-5.91817	2.35337	15.496	-2.09146	-3.16241	0.107782	2.1481	-3.41428	0.310322	1.48958	-1.25944	0.996829	0.102852	-0.0853312
24	-3.07149	3.2414	0.998686	7.34914	-1.65934	0.691088	-3.46812	-0.239783	-1.01807	0.679772	-4.4121	-4.65379	0.968237	-0.88072	1.20723	-4.22888	3.09279	-4.43101	3.58066	3.16956	-1.01413	0.898885	-2.09146	11.6795	-2.15087	4.11296	-0.742668	0.814807	0.374614	-1.65479	2.23248	-0.412748	0.326453	-0.161752
25	-0.36082	-1.25506	0.978453	1.34727	0.623931	-0.791662	0.383251	0.87213	-1.04642	2.55745	-1.59014	0.243699	-0.573582	2.23234	0.399429	7.65625	-4.4068	-4.87688	-1.328	-0.899631	0.503043	-2.26052	-3.16241	-2.15087	19.6737	-1.75556	-5.00594	-2.60787	-2.94377	-0.0762653	-3.10759	-1.20846	-0.964739	0.433276
26	0.889337	-0.445654	0.156461	3.52925	-0.579953	1.41276	-1.57721	-0.964623	-1.35318	-0.14751	-2.46361	-2.63835	-1.36326	-1.57365	2.77145	-0.827871	0.676139	-3.73097	2.43291	-2.79688	-0.213414	1.78686	0.107782	4.11296	-1.75556	5.5227	-0.640779	-1.52964	-0.30225	-1.13867	-0.919475	-0.314154	-0.183924	-0.00496437
27	3.00667	-3.74152	-1.81429	-2.27929	1.47264	0.19172	0.064912	4.19106	4.82302	0.918937	4.62651	1.38607	-2.52424	-2.9813	5.11655	-3.74263	4.10827	2.39495	2.4908	-0.943446	4.93817	4.13865	2.1481	-0.742668	-5.00594	-0.640779	12.2608	-2.4907	3.50733	1.54363	3.34751	1.49013	0.018226	-0.0622898
28	-4.89942	3.22417	-0.658258	3.55457	0.425064	-2.60185	-1.55812	-2.5682	-2.3909	3.42409	-3.32518	-2.19767	-1.3975	6.29342	-6.43779	0.0140293	-3.31052	0.15306	1.20636	0.665569	0.141692	-0.528737	-3.41428	0.814807	-2.60787	-1.52964	-2.4907	8.33064	1.08096	-1.93705	2.83346	-0.299966	0.766517	-0.285266
29	1.43283	-0.77075	-0.517493	-0.841115	0.651034	-2.29387	-0.38422	1.28033	0.410907	0.0348174	1.01085	-1.03986	-0.318733	0.967142	0.236323	-3.44093	0.87497	0.500598	0.593572	0.217677	2.25874	2.39975	0.310322	0.374614	-2.94377	-0.30225	3.50733	1.08096	3.40759	0.288792	3.6842	0.695495	0.568321	-0.218095
30	1.1653	-0.928773	-0.611535	-3.24948	0.0783761	0.103827	1.47983	1.10727	0.499793	-1.54839	1.64909	1.90069	0.0158386	-1.39595	0.704229	-0.75633	0.546983	1.00744	-0.556133	0.642434	0.351354	0.850348	1.48958	-1.65479	-0.0762653	-1.13867	1.54363	-1.93705	0.288792	1.86453	-0.479481	0.440274	0.247636	-0.0317106
31	1.3284	0.282916	0.535708	2.69987	0.961794	-3.88596	-1.39854	0.847604	2.17942	1.40143	-1.32312	-1.89145	-0.833332	3.58826	-0.45539	-5.01455	1.04531	1.36932	1.66348	-0.307466	2.96198	2.89718	-1.25944	2.23248	-3.10759	-0.919475	3.34751	2.83346	3.6842	-0.479481	7.43688	0.642408	1.18601	-0.362985
32	0.169088	-0.830497	0.100604	-2.24922	0.348232	-0.385956	0.379965	1.15513	0.649316	-1.21971	1.01855	0.624479	-0.185867	-0.705497	0.713483	-1.12928	0.16167	0.48834	-0.386477	0.450063	0.710872	0.979943	0.996829	-0.412748	-1.20846	-0.314154	1.49013	-0.299966	0.695495	0.440274	0.642408	0.505742	0.254846	-0.0954576
33	-0.0709953	0.0533553	0.164643	-0.413777	0.308198	-0.954166	0.145946	0.108646	0.126924	-0.713575	-0.444937	0.272206	-0.512213	0.799748	-0.136566	-1.36605	-0.185633	0.0667189	0.152367	0.294641	0.334379	0.88787	0.102852	0.326453	-0.964739	-0.183924	0.018226	0.766517	0.568321	0.247636	1.18601	0.254846	0.571377	-0.15026
34	0.123495	-0.0305794	-0.0520951	0.186564	-0.0735194	0.272745	0.0116959	-0.0454024	0.0522459	0.204068	0.108097	0.0595489	0.115922	-0.15314	0.10726	0.3971	0.122721	-0.00338603	-0.0391461	-0.0831924	-0.112082	-0.317149	-0.0853312	-0.161752	0.433276	-0.00496437	-0.0622898	-0.285266	-0.218095	-0.0317106	-0.362985	-0.0954576	-0.15026	0.0499249
35-dimensional	43.5349	13.1683	1.02426	7.37568	0.707806	-6.52847	-2.30784	-8.70077	3.90651	-1.7661	-7.49261	0.142948	-1.95668	3.016	-0.997631	-2.27083	-0.327503	-4.67161	5.86618	2.91687	1.15482	-3.29926	4.15901	1.97881	0.418068	0.430128	-0.0767271	2.45553	0.23705	-0.517356	0.904452	-0.0075151	-0.05898	-0.121794	0.0935674
2	13.1683	44.4099	-0.273174	2.9972	3.88802	1.3576	-2.68241	-1.55372	2.85704	-3.30609	-2.79249	0.773072	-3.44503	-1.38275	0.498323	0.209388	-5.22369	-8.04855	1.18399	4.64922	2.30594	0.146689	5.5566	-3.40699	-2.69625	1.47277	0.661932	1.381	-1.59806	-0.426079	1.19429	-6.05777	-1.30053	-0.603947	-0.104574
3	1.02426	-0.273174	24.8686	-9.96723	2.3983	6.4794	1.3416	2.23288	-0.573921	-1.11825	-2.82609	0.0493696	4.6234	1.50414	-4.0465	-7.10061	5.89243	-2.64828	5.72622	0.990347	-1.98538	2.45616	4.36165	3.78613	-3.70674	-1.33511	-0.0958503	0.615842	4.00378	1.98431	-0.767869	4.92159	0.586846	0.245056	0.119477
4	7.37568	2.9972	-9.96723	39.0988	-2.99793	-8.65693	-4.8112	-5.80069	1.88197	2.53727	-6.06544	0.965765	-4.80651	-1.73139	0.928714	4.55969	-2.61638	5.26178	-0.621182	0.232184	1.48652	-4.73529	-2.6476	-5.43727	4.49853	2.42129	-0.863089	-0.0903956	-2.62188	-3.55	0.491853	-4.50404	1.86433	-0.739468	-0.0184284
5	0.707806	3.88802	2.3983	-2.99793	15.9619	-5.70723	-2.55197	-0.718432	3.50673	1.52926	-3.3844	2.32136	2.19417	-1.01376	1.23667	1.62155	0.0376414	-0.562022	7.77013	2.22384	2.97541	-0.493624	-1.07442	1.31481	-1.58216	2.28481	-1.39493	-2.45064	0.362197	-0.120368	-0.764199	-0.965842	-0.244314	0.0876841	0.0515525
6	-6.52847	1.3576	6.4794	-8.65693	-5.70723	54.6995	5.39105	2.49983	-4.38781	-1.90664	8.43763	3.06761	-3.38319	5.17377	-9.32883	-2.95472	-1.12356	-3.73882	-13.3689	-0.451249	0.128019	5.01062	0.325638	-0.984088	-4.09073	-2.22601	1.09845	4.40752	1.84988	1.5942	-0.0065823	3.10135	0.453393	-0.287193	0.0833484
7	-2.30784	-2.68241	1.3416	-4.8112	-2.55197	5.39105	14.8477	5.39722	-4.9579	3.00597	6.87245	0.00464443	1.50679	4.70043	2.41495	1.38902	3.9358	-4.65339	0.223815	-0.845055	-3.11878	7.27301	1.17639	6.72993	-4.59694	-2.42738	4.21504	3.53782	1.1928	-1.05475	1.39725	2.44301	1.1121	-0.463405	0.117377
8	-8.70077	-1.55372	2.23288	-5.80069	-0.718432	2.49983	5.39722	20.673	-6.86809	-2.19642	2.87897	-4.1232	6.54218	-0.747952	-0.604707	-3.25471	1.54213	-1.77505	-1.52599	-0.341968	-2.88809	9.4584	-1.52621	1.27215	-4.10137	-3.041	-0.196503	0.929901	0.883872	0.759188	-0.245317	1.60586	-0.203832	-0.0189857	0.125214
9	3.90651	2.85704	-0.573921	1.88197	3.50673	-4.38781	-4.9579	-6.86809	15.2893	4.95809	1.66843	9.63304	-0.873657	-7.53447	-1.40391	0.949854	-4.18693	4.90323	3.21154	1.63843	-0.300567	-4.04654	2.33996	-5.68298	3.39672	3.13306	-0.972338	-2.53288	-1.63943	-1.50496	0.270355	-1.81413	-1.00695	0.329503	0.0540639
10	-1.7661	-3.30609	-1.11825	2.53727	1.52926	-1.90664	3.00597	-2.19642	4.95809	15.6692	2.52813	6.60633	2.73433	-3.56992	1.81482	2.79175	0.932274	8.14123	-0.560634	-0.229391	-3.74344	1.67311	0.00132535	2.07754	-1.10946	1.92553	1.9411	0.356407	-0.552059	0.109551	0.447756	0.584108	0.606986	-0.172842	-0.0880391
11	-7.49261	-2.79249	-2.82609	-6.06544	-3.3844	8.43763	6.87245	2.87897	1.66843	2.52813	29.2587	-0.235994	2.01876	-4.54152	0.873596	-0.356202	-1.72759	2.16968	-1.76535	-0.198989	-0.0256527	4.13441	3.37283	0.619712	-3.83505	-0.218876	1.08322	0.0845408	-0.279658	1.90811	0.589218	0.294738	-1.54512	-0.0849669	0.0119669
12	0.142948	0.773072	0.0493696	0.965765	2.32136	3.06761	0.00464443	-4.1232	9.63304	6.60633	-0.235994	22.8446	-4.3669	1.14193	-3.13913	1.23123	-2.2065	0.640718	-1.46858	-1.27617	-3.51927	1.51364	-1.60636	-2.48881	1.23941	0.978338	-1.53207	-1.96069	-0.176042	-1.4071	0.697094	-0.201934	0.267647	-0.122608	0.0170932
13	-1.95668	-3.44503	4.6234	-4.80651	2.19417	-3.38319	1.50679	6.54218	-0.873657	2.73433	2.01876	-4.3669	23.2007	-1.96113	-1.16837	-5.73669	6.42689	2.47943	6.88341	-0.595496	-4.37586	-1.12161	-3.2332	0.657984	-0.0477328	-6.17015	-0.806235	2.43688	1.59671	3.7035	-1.03162	4.16374	-1.37681	0.660632	-0.00907855
14	3.016	-1.38275	1.50414	-1.73139	-1.01376	5.17377	4.70043	-0.747952	-7.53447	-3.56992	-4.54152	1.14193	-1.96113	41.4615	1.40152	-3.22244	-1.59124	-1.49755	6.7755	0.0489051	3.52654	-0.390931	-2.90099	5.79745	-0.82412	-1.33494	-1.53598	0.89463	0.813638	0.627923	1.00085	1.28828	-0.901059	-0.0418508	0.109025
15	-0.997631	0.498323	-4.0465	0.928714	1.23667	-9.32883	2.41495	-0.604707	-1.40391	1.81482	0.873596	-3.13913	-1.16837	1.40152	11.5255	7.74143	0.696603	3.75892	4.18692	-0.364462	1.60722	-0.719507	-2.07714	0.616547	-0.343911	0.964246	1.20537	-3.61462	-1.46615	-1.54789	0.238473	-3.84476	-0.555077	-0.19042	0.105721
16	-2.27083	0.209388	-7.10061	4.55969	1.62155	-2.95472	1.38902	-3.25471	0.949854	2.79175	-0.356202	1.23123	-5.73669	-3.22244	7.74143	18.185	-0.487979	5.27229	-2.27763	-0.556331	1.7996	-0.894532	-3.83894	-3.97846	-0.0301531	2.77584	0.898745	-5.85051	-2.01122	-1.84792	-0.196304	-4.934	0.0073615	-0.189718	-0.0730924
17	-0.327503	-5.22369	5.89243	-2.61638	0.0376414	-1.12356	3.9358	1.54213	-4.18693	0.932274	-1.72759	-2.2065	6.42689	-1.59124	0.696603	-0.487979	17.6179	-5.00357	6.01958	1.15308	-4.06764	-0.162071	-2.52577	3.89017	0.546498	0.515293	2.45121	0.624103	1.77459	1.5013	-0.602117	2.46024	0.241617	0.620348	-0.243747
18	-4.67161	-8.04855	-2.64828	5.26178	-0.562022	-3.73882	-4.65339	-1.77505	4.90323	8.14123	2.16968	0.640718	2.47943	-1.49755	3.75892	5.27229	-5.00357	24.3029	-1.89999	-2.17332	-0.597737	-4.52115	-5.33139	-4.61069	1.28473	0.103541	-3.48904	-4.34976	-1.13939	-0.931944	-0.239681	-1.18128	-0.478637	0.327603	0.0758199
19	5.86618	1.18399	5.72622	-0.621182	7.77013	-13.3689	0.223815	-1.52599	3.21154	-0.560634	-1.76535	-1.46858	6.88341	6.7755	4.18692	-2.27763	6.01958	-1.89999	26.4984	0.91991	-0.790851	-0.0441501	1.85697	1.52772	-0.172622	0.178865	1.09067	-1.26765	0.369631	0.140578	0.487704	0.879771	-0.695412	0.14885	0.0778575
20	2.91687	4.64922	0.990347	0.232184	2.22384	-0.451249	-0.845055	-0.341968	1.63843	-0.229391	-0.198989	-1.27617	-0.595496	0.0489051	-0.364462	-0.556331	1.15308	-2.17332	0.91991	7.82717	-0.887384	-1.00849	2.87066	-0.250297	1.0765	-0.0537465	-0.386822	0.93606	0.0999176	0.754295	-0.0749628	-1.03718	-1.7918	0.35438	0.108993
21	1.15482	2.30594	-1.98538	1.48652	2.97541	0.128019	-3.11878	-2.88809	-0.300567	-3.74344	-0.0256527	-3.51927	-4.37586	3.52654	1.60722	1.7996	-4.06764	-0.597737	-0.790851	-0.887384	11.1775	-3.59241	-3.70781	-1.87239	2.09952	2.43715	-1.76879	-1.89798	-1.77883	-1.20012	0.355163	-3.5363	-0.204508	-0.0769402	-0.103474
22	-3.29926	0.146689	2.45616	-4.73529	-0.493624	5.01062	7.27301	9.4584	-4.04654	1.67311	4.13441	1.51364	-1.12161	-0.390931	-0.719507	-0.894532	-0.162071	-4.52115	-0.0441501	-1.00849	-3.59241	13.6161	3.13822	2.72701	-4.76458	-1.649	3.33344	2.42829	1.14004	0.629382	1.19077	2.86986	0.125805	-0.400855	0.121155
23	4.15901	5.5566	4.36165	-2.6476	-1.07442	0.325638	1.17639	-1.52621	2.33996	0.00132535	3.37283	-1.60636	-3.2332	-2.90099	-2.07714	-3.83894	-2.52577	-5.33139	1.85697	2.87066	-3.70781	3.13822	16.2713	2.83122	-4.02867	-0.101354	1.44228	1.93566	0.950204	1.31094	-0.521314	2.22733	0.197693	-0.123426	-0.018094
24	1.97881	-3.40699	3.78613	-5.43727	1.31481	-0.984088	6.72993	1.27215	-5.68298	2.07754	0.619712	-2.48881	0.657984	5.79745	0.616547	-3.97846	3.89017	-4.61069	1.52772	-0.250297	-1.87239	2.72701	2.83122	15.7531	-6.04742	0.208883	0.496754	2.93104	2.78254	0.542998	0.182695	5.12147	1.90398	-0.428895	0.133321
25	0.418068	-2.69625	-3.70674	4.49853	-1.58216	-4.09073	-4.59694	-4.10137	3.39672	-1.10946	-3.83505	1.23941	-0.0477328	-0.82412	-0.343911	-0.0301531	0.546498	1.28473	-0.172622	1.0765	2.09952	-4.76458	-4.02867	-6.04742	10.1965	0.121082	-1.49111	0.0945174	-0.634495	-0.476343	-0.623664	-0.42586	-0.873128	0.911544	-0.121345
26	0.430128	1.47277	-1.33511	2.42129	2.28481	-2.22601	-2.42738	-3.041	3.13306	1.92553	-0.218876	0.978338	-6.17015	-1.33494	0.964246	2.77584	0.515293	0.103541	0.178865	-0.0537465	2.43715	-1.649	-0.101354	0.208883	0.121082	8.12516	1.16923	-2.48992	-0.901466	-2.26298	0.243273	-3.46941	1.52711	-0.393133	-0.216388
27	-0.0767271	0.661932	-0.0958503	-0.863089	-1.39493	1.09845	4.21504	-0.196503	-0.972338	1.9411	1.08322	-1.53207	-0.806235	-1.53598	1.20537	0.898745	2.45121	-3.48904	1.09067	-0.386822	-1.76879	3.33344	1.44228	0.496754	-1.49111	1.16923	5.76785	1.89867	-0.190304	-0.433581	1.81078	-0.327371	-0.0648961	-0.517871	0.00746844
28	2.45553	1.381	0.615842	-0.0903956	-2.45064	4.40752	3.53782	0.929901	-2.53288	0.356407	0.0845408	-1.96069	2.43688	0.89463	-3.61462	-5.85051	0.624103	-4.34976	-1.26765	0.93606	-1.89798	2.42829	1.93566	2.93104	0.0945174	-2.48992	1.89867	6.47262	1.36484	0.533987	0.891684	3.04818	0.390716	-0.190331	0.059233
29	0.23705	-1.59806	4.00378	-2.62188	0.362197	1.84988	1.1928	0.883872	-1.63943	-0.552059	-0.279658	-0.176042	1.59671	0.813638	-1.46615	-2.01122	1.77459	-1.13939	0.369631	0.0999176	-1.77883	1.14004	0.950204	2.78254	-0.634495	-0.901466	-0.190304	1.36484	3.2596	1.66129	-1.07074	3.67064	0.52267	0.124556	0.143763
30	-0.517356	-0.426079	1.98431	-3.55	-0.120368	1.5942	-1.05475	0.759188	-1.50496	0.109551	1.90811	-1.4071	3.7035	0.627923	-1.54789	-1.84792	1.5013	-0.931944	0.140578	0.754295	-1.20012	0.629382	1.31094	0.542998	-0.476343	-2.26298	-0.433581	0.533987	1.66129	4.72108	-0.796079	2.70289	-1.54811	0.533504	-0.123449
31	0.904452	1.19429	-0.767869	0.491853	-0.764199	-0.0065823	1.39725	-0.245317	0.270355	0.447756	0.589218	0.697094	-1.03162	1.00085	0.238473	-0.196304	-0.602117	-0.239681	0.487704	-0.0749628	0.355163	1.19077	-0.521314	0.182695	-0.623664	0.243273	1.81078	0.891684	-1.07074	-0.796079	2.47963	-1.54102	-0.765262	-0.384004	-0.0688128
32	-0.0075151	-6.05777	4.92159	-4.50404	-0.965842	3.10135	2.44301	1.60586	-1.81413	0.584108	0.294738	-0.201934	4.16374	1.28828	-3.84476	-4.934	2.46024	-1.18128	0.879771	-1.03718	-3.5363	2.86986	2.22733	5.12147	-0.42586	-3.46941	-0.327371	3.04818	3.67064	2.70289	-1.54102	7.87301	0.384153	0.494389	0.244891
33	-0.05898	-1.30053	0.586846	1.86433	-0.244314	0.453393	1.1121	-0.203832	-1.00695	0.606986	-1.54512	0.267647	-1.37681	-0.901059	-0.555077	0.0073615	0.241617	-0.478637	-0.695412	-1.7918	-0.204508	0.125805	0.197693	1.90398	-0.873128	1.52711	-0.0648961	0.390716	0.52267	-1.54811	-0.765262	0.384153	2.63324	-0.331757	-0.0543466
34	-0.121794	-0.603947	0.245056	-0.739468	0.0876841	-0.287193	-0.463405	-0.0189857	0.329503	-0.172842	-0.0849669	-0.122608	0.660632	-0.0418508	-0.19042	-0.189718	0.620348	0.327603	0.14885	0.35438	-0.0769402	-0.400855	-0.123426	-0.428895	0.911544	-0.393133	-0.517871	-0.190331	0.124556	0.533504	-0.384004	0.494389	-0.331757	0.291112	-0.0316807
35	0.0935674	-0.104574	0.119477	-0.0184284	0.0515525	0.0833484	0.117377	0.125214	0.0540639	-0.0880391	0.0119669	0.0170932	-0.00907855	0.109025	0.105721	-0.0730924	-0.243747	0.0758199	0.0778575	0.108993	-0.103474	0.121155	-0.018094	0.133321	-0.121345	-0.216388	0.00746844	0.059233	0.143763	-0.123449	-0.0688128	0.244891	-0.0543466	-0.0316807	0.0812482
36-dimensional	48.1911	3.04209	-0.943077	5.14452	-1.75962	10.5724	3.745	0.045811	-2.15819	-4.19927	2.65708	-4.90354	-0.0278723	6.34981	6.20022	6.06249	1.54731	11.1923	2.66144	-1.18642	-3.92932	3.37662	-1.85806	0.0922172	-0.0171229	-2.45938	-8.18324	3.27564	1.91266	-1.93456	1.49864	4.81895	-0.164722	-0.830916	0.541781	-0.163257
2	3.04209	50.6959	0.953414	2.13931	-6.78144	3.03018	-1.97696	2.45072	-8.21024	4.05832	4.57637	1.03748	-0.240627	-5.3245	5.51271	-1.30816	-1.94348	-3.50973	-0.0784452	1.30376	-2.7913	-0.453213	-2.34389	9.16002	6.08808	-4.09176	2.43661	1.97693	-1.58422	1.72166	4.08439	-3.23893	-1.79694	3.2546	0.307902	0.581718
3	-0.943077	0.953414	33.3721	-8.89168	-0.60688	5.67114	-4.02428	-3.18218	-3.61491	-2.31963	0.0831642	5.9315	0.968573	-0.0255697	6.3439	1.75215	-3.81062	-0.563984	4.99176	2.41614	-3.10364	-4.48575	2.51335	2.82318	4.97409	0.96142	-2.86537	-2.46318	-1.26435	1.266	-2.17145	-4.39877	-0.245639	-0.819659	0.099439	-0.203526
4	5.14452	2.13931	-8.89168	30.9213	-1.31344	0.434984	2.89495	2.27586	0.104868	0.0347782	-2.21948	-3.06315	-2.1573	3.56892	-4.05468	-4.26162	2.73987	1.45422	-2.63555	-0.342217	1.36156	-1.18567	0.674334	0.628587	0.701098	-1.74123	0.728793	0.860535	1.75795	-2.16561	-0.980166	2.66649	1.0476	1.69741	0.00534795	0.337848
5	-1.75962	-6.78144	-0.60688	-1.31344	16.6592	-2.53291	0.0865497	-2.75986	1.78755	1.74753	4.48462	2.53103	-2.42449	1.08886	-2.2037	-3.47646	-4.90876	-3.09168	-3.80442	2.65401	0.672432	1.53989	-3.37456	-1.68542	0.96715	2.91083	3.8042	0.0104017	-1.16591	0.334695	1.66554	1.55542	-0.352377	-2.78919	0.0820911	-0.541268
6	10.5724	3.03018	5.67114	0.434984	-2.53291	31.076	2.27645	-5.27583	0.616973	-4.06219	-2.07632	-2.24037	-3.08868	8.5897	4.18746	2.42959	-3.43791	4.7415	1.47225	-1.13563	-3.45462	0.326388	-0.368664	1.98051	4.85092	1.13296	-3.37047	1.99227	-0.0726453	-1.12379	-0.553639	0.739902	1.6258	-0.477407	-0.392996	0.0485952
7	3.745	-1.97696	-4.02428	2.89495	0.0865497	2.27645	9.44706	1.93847	3.24753	-0.132642	-7.15488	-3.18065	2.90335	3.90014	2.63485	0.286323	2.0824	5.87904	-0.998666	1.28182	-0.311926	2.93199	0.65685	-1.30732	-0.717342	-0.912979	-1.26319	3.07291	1.62062	-1.2354	0.526145	4.40485	-0.697919	-1.20493	-0.364787	-0.429446
8	0.045811	2.45072	-3.18218	2.27586	-2.75986	-5.27583	1.93847	21.3196	-4.01138	0.934798	0.123979	-1.50771	4.35455	-2.27681	-1.3869	-5.03488	0.198146	-0.529492	4.22806	-0.472476	-2.63219	-0.207846	-1.42067	-1.90684	-2.9301	0.515739	2.31079	0.643752	2.4527	-1.97709	-2.27767	2.42642	1.37559	1.15382	0.14243	0.274506
9	-2.15819	-8.21024	-3.61491	0.104868	1.78755	0.616973	3.24753	-4.01138	15.0054	2.33718	-3.36401	-2.96643	3.0289	5.22907	-1.70369	6.60471	-1.45705	-0.0355527	-2.6219	4.45322	-0.183677	-1.08637	3.19892	-2.23996	-5.20829	2.70258	2.84887	0.319826	1.51626	-0.298864	0.218042	1.34291	0.369073	-1.3791	-0.507208	-0.456361
10	-4.19927	4.05832	-2.31963	0.0347782	1.74753	-4.06219	-0.132642	0.934798	2.33718	10.9533	4.82628	8.14606	-0.0205192	1.24175	-0.965935	2.49423	-4.40349	-1.30621	1.89126	4.51174	0.933243	1.45143	-4.00773	2.39422	0.123487	1.47829	7.3171	2.32896	-0.122879	0.484668	0.409208	-1.2425	0.109075	0.426512	0.224017	0.13435
11	2.65708	4.57637	0.0831642	-2.21948	4.48462	-2.07632	-7.15488	0.123979	-3.36401	4.82628	30.7243	2.28036	0.943525	-3.78673	-2.75405	-0.790092	-5.60682	-0.0301678	-1.72093	5.05805	0.149307	1.48254	-4.49282	1.23839	1.78898	2.02549	6.16683	-0.0773446	0.218936	0.59866	3.36447	-2.3109	1.78167	0.967002	0.292497	0.258902
12	-4.90354	1.03748	5.9315	-3.06315	2.53103	-2.24037	-3.18065	-1.50771	-2.96643	8.14606	2.28036	32.6998	4.43061	-1.84786	-2.83003	-3.27303	-0.00188352	-10.4792	6.26657	1.21625	3.39758	1.37895	-2.52707	2.45754	7.0782	4.04112	5.31689	0.953579	-3.82129	2.79618	-0.512172	-6.29988	0.133623	-0.715295	0.143232	0.144459
13	-0.0278723	-0.240627	0.968573	-2.1573	-2.42449	-3.08868	2.90335	4.35455	3.0289	-0.0205192	0.943525	4.43061	25.0184	-5.17357	-1.94867	0.241737	6.60474	-2.96338	7.55373	3.76861	-1.30019	-4.31989	4.00113	-1.63254	0.309677	1.49539	2.56487	2.97886	2.23881	-2.23825	0.440445	2.2819	1.13736	0.296825	-0.108934	-0.042493
14	6.34981	-5.3245	-0.0255697	3.56892	1.08886	8.5897	3.90014	-2.27681	5.22907	1.24175	-3.78673	-1.84786	-5.17357	30.3386	8.19888	13.1726	-3.70673	4.70619	10.6266	2.84945	-4.72487	3.87752	-2.42128	2.82526	-0.263817	2.27713	1.36075	2.84904	1.59835	-0.00279756	-1.87116	0.866187	-0.754225	-1.86479	0.0553106	-0.533884
15	6.20022	5.51271	6.3439	-4.05468	-2.2037	4.18746	2.63485	-1.3869	-1.70369	-0.965935	-2.75405	-2.83003	-1.94867	8.19888	17.8245	9.97789	-5.03728	10.6949	4.83421	-0.288366	-8.76102	2.49572	-0.940427	0.5367	0.746376	-2.12334	-4.19344	2.58418	0.576318	0.171992	-3.42789	-0.402838	-1.87844	-0.503199	-0.369262	-0.276659
16	6.06249	-1.30816	1.75215	-4.26162	-3.47646	2.42959	0.286323	-5.03488	6.60471	2.49423	-0.790092	-3.27303	0.241737	13.1726	9.97789	21.6117	-6.97212	10.091	7.24785	0.424567	-3.84688	-0.614841	0.0925658	1.08919	-0.797273	0.775991	-1.9936	-0.350737	1.73392	-0.00155415	-2.98942	-0.667659	-0.469157	-0.560224	-0.217901	-0.316262
17	1.54731	-1.94348	-3.81062	2.73987	-4.90876	-3.43791	2.0824	0.198146	-1.45705	-4.40349	-5.60682	-0.00188352	6.60474	-3.70673	-5.03728	-6.97212	18.8016	-1.30214	-1.26978	-0.659958	2.17774	-0.964957	5.6837	-0.613348	-3.88015	-2.47124	-1.88469	1.6836	-0.803758	0.377004	3.7341	0.891513	-0.900939	0.748254	0.278742	0.103328
18	11.1923	-3.50973	-0.563984	1.45422	-3.09168	4.7415	5.87904	-0.529492	-0.0355527	-1.30621	-0.0301678	-10.4792	-2.96338	4.70619	10.6949	10.091	-1.30214	39.4526	-1.33767	-6.25351	0.137862	1.69505	2.20851	-10.5278	-0.76606	-1.32586	-3.68412	1.90552	2.68585	-1.20225	-1.83881	2.96221	-0.795024	-0.318562	0.0390983	-0.190062
19	2.66144	-0.0784452	4.99176	-2.63555	-3.80442	1.47225	-0.998666	4.22806	-2.6219	1.89126	-1.72093	6.26657	7.55373	10.6266	4.83421	7.24785	-1.26978	-1.33767	21.7768	2.50298	-5.10188	1.54009	0.0554637	0.91853	1.61303	3.22698	1.11813	2.15257	1.13042	-1.99647	-2.99097	-1.57449	2.83754	0.112624	0.23083	0.304889
20	-1.18642	1.30376	2.41614	-0.342217	2.65401	-1.13563	1.28182	-0.472476	4.45322	4.51174	5.05805	1.21625	3.76861	2.84945	-0.288366	0.424567	-0.659958	-6.25351	2.50298	13.3702	-1.79083	-0.0381222	-0.641736	4.73803	-2.83791	1.90624	5.77061	1.92331	-0.0234664	-0.339562	3.13906	-0.0818532	0.860532	-0.716264	-0.0242746	-0.245157
21	-3.92932	-2.7913	-3.10364	1.36156	0.672432	-3.45462	-0.311926	-2.63219	-0.183677	0.933243	0.149307	3.39758	-1.30019	-4.72487	-8.76102	-3.84688	2.17774	0.137862	-5.10188	-1.79083	14.6245	0.161179	0.745684	-0.3753	-0.147103	-1.13525	1.00968	-4.4672	-0.994806	2.21604	3.77876	-1.72789	-1.75395	-0.168943	0.0120041	-0.366205
22	3.37662	-0.453213	-4.48575	-1.18567	1.53989	0.326388	2.93199	-0.207846	-1.08637	1.45143	1.48254	1.37895	-4.31989	3.87752	2.49572	-0.614841	-0.964957	1.69505	1.54009	-0.0381222	0.161179	10.2334	-3.30879	-0.586119	-0.193257	0.973413	0.342909	2.04876	-0.398124	0.624349	0.606021	-1.05116	0.492465	-0.40588	-0.166582	-0.00313086
23	-1.85806	-2.34389	2.51335	0.674334	-3.37456	-0.368664	0.65685	-1.42067	3.19892	-4.00773	-4.49282	-2.52707	4.00113	-2.42128	-0.940427	0.0925658	5.6837	2.20851	0.0554637	-0.641736	0.745684	-3.30879	16.2351	-8.42384	-1.05069	0.911935	-0.508758	-1.56	-1.88157	0.240563	1.58352	-1.09202	-0.288151	-1.01241	0.0671407	-0.276855
24	0.0922172	9.16002	2.82318	0.628587	-1.68542	1.98051	-1.30732	-1.90684	-2.23996	2.39422	1.23839	2.45754	-1.63254	2.82526	0.5367	1.08919	-0.613348	-10.5278	0.91853	4.73803	-0.3753	-0.586119	-8.42384	15.3879	3.54079	-1.6717	-0.956765	1.55513	0.225488	0.470313	0.881973	-1.9847	0.12556	1.66791	-0.0125094	0.223949
25	-0.0171229	6.08808	4.97409	0.701098	0.96715	4.85092	-0.717342	-2.9301	-5.20829	0.123487	1.78898	7.0782	0.309677	-0.263817	0.746376	-0.797273	-3.88015	-0.76606	1.61303	-2.83791	-0.147103	-0.193257	-1.05069	3.54079	21.2047	1.29273	-3.03801	1.39681	-2.14783	1.15332	0.255759	-2.63822	0.757181	-0.971323	0.629294	0.0972586
26	-2.45938	-4.09176	0.96142	-1.74123	2.91083	1.13296	-0.912979	0.515739	2.70258	1.47829	2.02549	4.04112	1.49539	2.27713	-2.12334	0.775991	-2.47124	-1.32586	3.22698	1.90624	-1.13525	0.973413	0.911935	-1.6717	1.29273	6.94928	3.65732	-0.0664791	0.0929882	-0.0467693	-1.35947	-1.73923	2.17426	-1.63587	-0.239247	-0.16388
27	-8.18324	2.43661	-2.86537	0.728793	3.8042	-3.37047	-1.26319	2.31079	2.84887	7.3171	6.16683	5.31689	2.56487	1.36075	-4.19344	-1.9936	-1.88469	-3.68412	1.11813	5.77061	1.00968	0.342909	-0.508758	-0.956765	-3.03801	3.65732	11.9269	1.28116	-1.85119	1.23025	2.36043	-2.07068	0.66074	-0.0196866	0.0788979	0.0950996
28	3.27564	1.97693	-2.46318	0.860535	0.0104017	1.99227	3.07291	0.643752	0.319826	2.32896	-0.0773446	0.953579	2.97886	2.84904	2.58418	-0.350737	1.6836	1.90552	2.15257	1.92331	-4.4672	2.04876	-1.56	1.55513	1.39681	-0.0664791	1.28116	7.02742	-0.211145	-1.30921	0.00803304	1.93986	0.968727	0.298992	0.0517116	0.270046
29	1.91266	-1.58422	-1.26435	1.75795	-1.16591	-0.0726453	1.62062	2.4527	1.51626	-0.122879	0.218936	-3.82129	2.23881	1.59835	0.576318	1.73392	-0.803758	2.68585	1.13042	-0.0234664	-0.994806	-0.398124	-1.88157	0.225488	-2.14783	0.0929882	-1.85119	-0.211145	4.6349	-2.30704	-2.78464	2.50178	0.335268	0.77226	-0.0731626	-0.0258417
30	-1.93456	1.72166	1.266	-2.16561	0.334695	-1.12379	-1.2354	-1.97709	-0.298864	0.484668	0.59866	2.79618	-2.23825	-0.00279756	0.171992	-0.00155415	0.377004	-1.20225	-1.99647	-0.339562	2.21604	0.624349	0.240563	0.470313	1.15332	-0.0467693	1.23025	-1.30921	-2.30704	3.71965	2.18848	-2.65129	-1.52719	-0.990947	-0.191582	-0.320103
31	1.49864	4.08439	-2.17145	-0.980166	1.66554	-0.553639	0.526145	-2.27767	0.218042	0.409208	3.36447	-0.512172	0.440445	-1.87116	-3.42789	-2.98942	3.7341	-1.83881	-2.99097	3.13906	3.77876	0.606021	1.58352	0.881973	0.255759	-1.35947	2.36043	0.00803304	-2.78464	2.18848	9.2954	0.117437	-1.43927	-0.699852	0.449909	-0.252405
32	4.81895	-3.23893	-4.39877	2.66649	1.55542	0.739902	4.40485	2.42642	1.34291	-1.2425	-2.3109	-6.29988	2.2819	0.866187	-0.402838	-0.667659	0.891513	2.96221	-1.57449	-0.0818532	-1.72789	-1.05116	-1.09202	-1.9847	-2.63822	-1.73923	-2.07068	1.93986	2.50178	-2.65129	0.117437	7.04804	-0.349519	-0.720769	-0.110543	-0.207151
33	-0.164722	-1.79694	-0.245639	1.0476	-0.352377	1.6258	-0.697919	1.37559	0.369073	0.109075	1.78167	0.133623	1.13736	-0.754225	-1.87844	-0.469157	-0.900939	-0.795024	2.83754	0.860532	-1.75395	0.492465	-0.288151	0.12556	0.757181	2.17426	0.66074	0.968727	0.335268	-1.52719	-1.43927	-0.349519	3.06256	0.750884	-0.172653	0.41372
34	-0.830916	3.2546	-0.819659	1.69741	-2.78919	-0.477407	-1.20493	1.15382	-1.3791	0.426512	0.967002	-0.715295	0.296825	-1.86479	-0.503199	-0.560224	0.748254	-0.318562	0.112624	-0.716264	-0.168943	-0.40588	-1.01241	1.66791	-0.971323	-1.63587	-0.0196866	0.298992	0.77226	-0.990947	-0.699852	-0.720769	0.750884	2.37417	0.139019	0.534425
35	0.541781	0.307902	0.099439	0.00534795	0.0820911	-0.392996	-0.364787	0.14243	-0.507208	0.224017	0.292497	0.143232	-0.108934	0.0553106	-0.369262	-0.217901	0.278742	0.0390983	0.23083	-0.0242746	0.0120041	-0.166582	0.0671407	-0.0125094	0.629294	-0.239247	0.0788979	0.0517116	-0.0731626	-0.191582	0.449909	-0.110543	-0.172653	0.139019	0.345647	0.0579601
36	-0.163257	0.581718	-0.203526	0.337848	-0.541268	0.0485952	-0.429446	0.274506	-0.456361	0.13435	0.258902	0.144459	-0.042493	-0.533884	-0.276659	-0.316262	0.103328	-0.190062	0.304889	-0.245157	-0.366205	-0.00313086	-0.276855	0.223949	0.0972586	-0.16388	0.0950996	0.270046	-0.0258417	-0.320103	-0.252405	-0.207151	0.41372	0.534425	0.0579601	0.175976
37-dimensional	38.7631	0.904314	-3.67791	2.74584	1.76927	0.344386	-0.311465	3.5113	-0.207621	-5.06956	0.180311	-2.75673	-0.918545	-4.14119	-1.49922	-4.29225	-2.79279	2.2365	2.89493	-1.60647	0.172072	0.623943	2.39622	-0.844183	3.03252	0.337301	0.245599	2.72822	0.931016	0.626032	-3.85512	1.87026	1.17615	0.790676	-0.255458	-0.641952	-0.0580509
2	0.904314	36.0539	2.47823	0.833562	0.423417	-3.93056	3.8223	0.978566	-4.27654	-1.76748	2.15212	2.04272	-0.752268	2.44557	0.636881	-4.50405	-1.75812	1.35361	0.148282	0.532742	1.6326	1.99695	1.12087	-3.17091	-2.96753	0.321784	-2.14163	-3.41003	-0.236646	-2.06632	0.704984	-1.15997	0.694541	0.970126	0.131616	-0.895923	0.0814519
3	-3.67791	2.47823	33.4207	-1.28463	-0.402994	8.97406	3.91868	0.115398	-2.1498	-3.54931	-0.932261	1.56697	1.27206	0.510168	3.92894	-0.582228	-2.24756	7.18407	0.697276	0.898883	4.88936	2.11385	2.70051	0.838202	-0.516493	2.61029	-0.98615	-3.3821	0.635599	-0.398173	2.86854	-0.262427	1.67373	1.06464	1.11149	-1.63169	0.438962
4	2.74584	0.833562	-1.28463	34.3105	-2.09267	-8.69095	-2.69229	-4.25004	4.76136	-2.69805	-0.694985	-3.07877	3.51349	3.91571	-2.47811	4.25395	-2.24429	-0.77907	3.706	-2.77417	-5.02092	2.84636	-3.07155	1.40268	-2.91799	1.61411	1.73653	-2.54547	-0.83882	-1.60454	1.91754	-1.13661	0.459685	2.21416	-0.0136099	-1.15934	0.094903
5	1.76927	0.423417	-0.402994	-2.09267	15.2612	-0.913269	1.55237	-0.285912	-5.07105	-0.453792	-0.553487	1.97836	-1.08819	-2.55027	2.73408	-0.144841	-0.996409	2.23172	-1.14139	0.54762	2.64656	-2.02221	-2.91657	1.29434	2.72574	-2.22327	-2.67036	1.54627	-0.0135504	-0.443662	-2.03729	0.440281	-0.0274244	-3.20506	-0.391745	-0.0580377	-0.380614
6	0.344386	-3.93056	8.97406	-8.69095	-0.913269	56.2345	0.382543	1.70167	-0.515349	-3.66316	-9.70911	-5.53824	-1.0138	-1.61346	4.6208	-2.59729	2.32242	-5.41409	2.38521	4.9734	-0.383954	-1.93013	4.2831	-2.82104	-2.33842	-0.207861	1.37766	-1.00505	0.00485914	-1.19574	-1.61207	0.714757	1.25058	-3.01525	-0.389581	0.170171	-0.385369
7	-0.311465	3.8223	3.91868	-2.69229	1.55237	0.382543	12.6836	2.46314	-0.25096	0.22498	1.41575	-2.57792	-3.13423	1.61748	2.29449	-1.51818	3.96334	0.143963	-2.36069	1.1404	6.47434	-0.198944	-1.49623	-2.8709	-0.380799	0.523046	1.62785	-2.69431	-0.717081	-2.16764	-0.859689	0.249059	2.51169	-0.699631	0.00768406	-1.49971	-0.146779
8	3.5113	0.978566	0.115398	-4.25004	-0.285912	1.70167	2.46314	19.5454	-4.51597	-1.73561	5.19838	-2.92315	-2.10157	-3.7003	-0.301079	-4.01972	0.817177	0.280804	-8.47427	-0.589504	-0.759688	2.15152	-1.99805	-1.28201	1.01265	-0.574502	-1.14549	0.137117	-0.3663	-1.22721	0.207531	0.0643217	1.1843	-0.136762	-0.503258	-0.357986	-0.247311
9	-0.207621	-4.27654	-2.1498	4.76136	-5.07105	-0.515349	-0.25096	-4.51597	25.7394	7.77634	-4.82879	-7.15299	0.468992	7.39624	-4.33781	7.51072	5.42149	2.28572	11.8404	1.28374	0.364946	3.68384	0.764394	-1.41195	-0.086773	-2.17866	4.99569	7.51043	-0.682757	-2.24201	1.43817	-1.97456	-0.304291	1.0079	0.450255	-0.236916	0.117393
10	-5.06956	-1.76748	-3.54931	-2.69805	-0.453792	-3.66316	0.22498	-1.73561	7.77634	22.1063	6.27476	7.40226	-1.84202	-0.0566394	0.0507374	4.35286	2.65545	0.275692	8.93855	6.21369	-1.66635	-2.4009	0.526041	-4.38999	1.05527	-2.68995	0.928974	3.59168	-0.0722984	0.169005	0.187615	-0.392893	-1.01147	-2.23576	-0.325924	1.87872	-0.0108088
11	0.180311	2.15212	-0.932261	-0.694985	-0.553487	-9.70911	1.41575	5.19838	-4.82879	6.27476	26.513	-0.0280932	0.338581	-3.19416	3.60347	-0.595654	-2.88933	1.35197	-0.13829	1.30236	-0.193784	-1.52994	1.54181	-2.0876	-1.97404	1.34579	-2.44436	-1.02082	0.60469	1.87002	1.06179	1.73656	0.264653	0.0383801	-0.591538	1.84285	-0.0286882
12	-2.75673	2.04272	1.56697	-3.07877	1.97836	-5.53824	-2.57792	-2.92315	-7.15299	7.40226	-0.0280932	33.3411	0.442847	0.683396	0.0486274	-6.31202	-1.86647	1.48514	-2.33483	0.108004	0.186647	-5.47942	-0.904259	-2.1233	2.34357	1.68979	-0.34821	-1.48794	1.22854	4.92963	-4.65416	4.60333	-0.689804	-1.43535	-0.932411	2.49781	-0.36
13	-0.918545	-0.752268	1.27206	3.51349	-1.08819	-1.0138	-3.13423	-2.10157	0.468992	-1.84202	0.338581	0.442847	15.9578	-2.00427	1.26688	4.83473	0.00465411	-0.519358	-1.39774	-0.865451	0.786324	3.95833	-0.567385	0.21755	2.52652	1.07908	2.89139	0.0203862	1.09528	1.74695	1.01284	-0.194569	-0.377013	0.172293	0.660466	-0.673757	0.404159
14	-4.14119	2.44557	0.510168	3.91571	-2.55027	-1.61346	1.61748	-3.7003	7.39624	-0.0566394	-3.19416	0.683396	-2.00427	30.5428	-1.73241	1.51122	0.611158	5.07388	-2.90363	0.751376	2.64205	-0.133747	-2.86215	0.318737	-4.8193	2.73957	0.985501	-5.21366	-0.0949137	-2.79543	-0.996847	-2.32617	0.13526	-1.65657	0.800134	-0.707679	0.472541
15	-1.49922	0.636881	3.92894	-2.47811	2.73408	4.6208	2.29449	-0.301079	-4.33781	0.0507374	3.60347	0.0486274	1.26688	-1.73241	11.799	1.07928	-0.517743	-1.31974	-2.13473	4.73109	2.68933	-3.50815	3.43705	-2.21549	-3.15727	0.179012	-1.26218	-2.78388	-0.270569	-0.665774	1.31126	-0.538725	0.291951	-1.92252	-0.385595	-0.812279	-0.19287
16	-4.29225	-4.50405	-0.582228	4.25395	-0.144841	-2.59729	-1.51818	-4.01972	7.51072	4.35286	-0.595654	-6.31202	4.83473	1.51122	1.07928	21.548	3.76439	4.32796	11.3873	-1.47278	2.86122	3.61444	1.71367	1.19406	-2.89048	-1.71721	3.17328	0.317013	-0.91741	-3.76856	3.94124	-4.36183	-1.12794	0.879189	0.203582	-1.55313	-0.019949
17	-2.79279	-1.75812	-2.24756	-2.24429	-0.996409	2.32242	3.96334	0.817177	5.42149	2.65545	-2.88933	-1.86647	0.00465411	0.611158	-0.517743	3.76439	14.8617	-2.23612	0.123608	1.82948	2.79945	4.23903	5.8279	-3.03642	1.19747	-2.2519	3.11183	1.34723	-0.937738	-2.46558	-0.796869	-1.94006	-0.862793	-1.29353	-0.623466	-0.305385	-0.206578
18	2.2365	1.35361	7.18407	-0.77907	2.23172	-5.41409	0.143963	0.280804	2.28572	0.275692	1.35197	1.48514	-0.519358	5.07388	-1.31974	4.32796	-2.23612	14.8646	4.30416	-0.554258	1.40191	2.06617	-3.61784	0.513491	2.77948	0.691855	0.0796683	1.53246	0.977601	1.10316	0.780911	-0.0433058	-0.199065	-0.206244	0.708241	-0.484159	0.296486
19	2.89493	0.148282	0.697276	3.706	-1.14139	2.38521	-2.36069	-8.47427	11.8404	8.93855	-0.13829	-2.33483	-1.39774	-2.90363	-2.13473	11.3873	0.123608	4.30416	36.2954	1.97326	1.5192	1.24626	7.28933	-2.02027	0.888312	-1.98286	3.50104	1.87835	-0.143985	-2.26861	1.00035	-1.3336	-0.146966	0.255522	0.0575044	-0.364062	-0.26944
20	-1.60647	0.532742	0.898883	-2.77417	0.54762	4.9734	1.1404	-0.589504	1.28374	6.21369	1.30236	0.108004	-0.865451	0.751376	4.73109	-1.47278	1.82948	-0.554258	1.97326	10.0211	-1.70807	-0.323536	2.76075	-5.47873	-0.258831	-0.508313	-1.49627	0.585274	0.144176	0.649174	0.177026	0.453969	-0.000579219	-2.1935	0.482502	1.1238	0.182033
21	0.172072	1.6326	4.88936	-5.02092	2.64656	-0.383954	6.47434	-0.759688	0.364946	-1.66635	-0.193784	0.186647	0.786324	2.64205	2.68933	2.86122	2.79945	1.40191	1.5192	-1.70807	14.8448	-0.293277	5.01258	4.18893	0.295354	0.147761	0.290392	-0.947236	-0.224411	-3.31526	-0.840594	-2.23811	0.587048	-0.28467	0.283512	-2.21168	0.114895
22	0.623943	1.99695	2.11385	2.84636	-2.02221	-1.93013	-0.198944	2.15152	3.68384	-2.4009	-1.52994	-5.47942	3.95833	-0.133747	-3.50815	3.61444	4.23903	2.06617	1.24626	-0.323536	-0.293277	13.9738	3.2059	-1.04443	2.06198	-1.7278	-0.162693	1.13291	-1.34955	-2.33958	2.63664	-2.22459	0.77485	3.21988	0.606931	-1.5471	0.382937
23	2.39622	1.12087	2.70051	-3.07155	-2.91657	4.2831	-1.49623	-1.99805	0.764394	0.526041	1.54181	-0.904259	-0.567385	-2.86215	3.43705	1.71367	5.8279	-3.61784	7.28933	2.76075	5.01258	3.2059	23.1123	2.35917	1.49545	-1.9373	-1.45492	-2.03619	-2.20191	-1.36105	1.3528	-1.82551	-0.877256	2.31143	-0.57619	0.29663	-0.134153
24	-0.844183	-3.17091	0.838202	1.40268	1.29434	-2.82104	-2.8709	-1.28201	-1.41195	-4.38999	-2.0876	-2.1233	0.21755	0.318737	-2.21549	1.19406	-3.03642	0.513491	-2.02027	-5.47873	4.18893	-1.04443	2.35917	11.4297	1.60928	-0.73282	-1.44051	-0.905613	-0.809942	-1.27826	1.06471	-1.76255	-0.520379	0.939073	0.194838	-1.29544	0.0778363
25	3.03252	-2.96753	-0.516493	-2.91799	2.72574	-2.33842	-0.380799	1.01265	-0.086773	1.05527	-1.97404	2.34357	2.52652	-4.8193	-3.15727	-2.89048	1.19747	2.77948	0.888312	-0.258831	0.295354	2.06198	1.49545	1.60928	15.193	-0.228656	1.24396	3.28572	0.63656	2.27646	-2.32144	2.32414	-0.0602103	-0.780463	-0.260408	0.442971	-0.156749
26	0.337301	0.321784	2.61029	1.61411	-2.22327	-0.207861	0.523046	-0.574502	-2.17866	-2.68995	1.34579	1.68979	1.07908	2.73957	0.179012	-1.71721	-2.2519	0.691855	-1.98286	-0.508313	0.147761	-1.7278	-1.9373	-0.73282	-0.228656	5.88395	-0.13883	-2.83672	1.64627	1.70176	-0.879266	1.99583	1.20836	0.537868	0.598584	0.324964	0.417807
27	0.245599	-2.14163	-0.98615	1.73653	-2.67036	1.37766	1.62785	-1.14549	4.99569	0.928974	-2.44436	-0.34821	2.89139	0.985501	-1.26218	3.17328	3.11183	0.0796683	3.50104	-1.49627	0.290392	-0.162693	-1.45492	-1.44051	1.24396	-0.13883	11.5676	1.43237	0.22467	0.487659	-1.1658	0.353682	-0.198349	-0.560633	0.104303	-1.00443	-0.295711
28	2.72822	-3.41003	-3.3821	-2.54547	1.54627	-1.00505	-2.69431	0.137117	7.51043	3.59168	-1.02082	-1.48794	0.0203862	-5.21366	-2.78388	0.317013	1.34723	1.53246	1.87835	0.585274	-0.947236	1.13291	-2.03619	-0.905613	3.28572	-2.83672	1.43237	9.76226	0.825903	0.901718	-1.30221	0.342847	-1.36657	-0.441423	0.481379	0.808626	-0.0424941
29	0.931016	-0.236646	0.635599	-0.83882	-0.0135504	0.00485914	-0.717081	-0.3663	-0.682757	-0.0722984	0.60469	1.22854	1.09528	-0.0949137	-0.270569	-0.91741	-0.937738	0.977601	-0.143985	0.144176	-0.224411	-1.34955	-2.20191	-0.809942	0.63656	1.64627	0.22467	0.825903	1.74126	1.14864	-1.13889	1.09613	0.21327	-0.872651	0.465805	0.186227	0.175809
30	0.626032	-2.06632	-0.398173	-1.60454	-0.443662	-1.19574	-2.16764	-1.22721	-2.24201	0.169005	1.87002	4.92963	1.74695	-2.79543	-0.665774	-3.76856	-2.46558	1.10316	-2.26861	0.649174	-3.31526	-2.33958	-1.36105	-1.27826	2.27646	1.70176	0.487659	0.901718	1.14864	6.31147	-0.528253	4.06578	-0.331989	0.272178	0.352098	2.46434	0.0723528
31	-3.85512	0.704984	2.86854	1.91754	-2.03729	-1.61207	-0.859689	0.207531	1.43817	0.187615	1.06179	-4.65416	1.01284	-0.996847	1.31126	3.94124	-0.796869	0.780911	1.00035	0.177026	-0.840594	2.63664	1.3528	1.06471	-2.32144	-0.879266	-1.1658	-1.30221	-1.13889	-0.528253	5.83896	-2.46087	-0.906109	2.33892	0.438327	-0.467368	0.13445
32	1.87026	-1.15997	-0.262427	-1.13661	0.440281	0.714757	0.249059	0.0643217	-1.97456	-0.392893	1.73656	4.60333	-0.194569	-2.32617	-0.538725	-4.36183	-1.94006	-0.0433058	-1.3336	0.453969	-2.23811	-2.22459	-1.82551	-1.76255	2.32414	1.99583	0.353682	0.342847	1.09613	4.06578	-2.46087	4.78667	1.33444	-0.679768	-0.26374	2.11303	-0.209532
33	1.17615	0.694541	1.67373	0.459685	-0.0274244	1.25058	2.51169	1.1843	-0.304291	-1.01147	0.264653	-0.689804	-0.377013	0.13526	0.291951	-1.12794	-0.862793	-0.199065	-0.146966	-0.000579219	0.587048	0.77485	-0.877256	-0.520379	-0.0602103	1.20836	-0.198349	-1.36657	0.21327	-0.331989	-0.906109	1.33444	2.18201	-0.0914908	0.0058841	-0.480258	0.00768989
34	0.790676	0.970126	1.06464	2.21416	-3.20506	-3.01525	-0.699631	-0.136762	1.0079	-2.23576	0.0383801	-1.43535	0.172293	-1.65657	-1.92252	0.879189	-1.29353	-0.206244	0.255522	-2.1935	-0.28467	3.21988	2.31143	0.939073	-0.780463	0.537868	-0.560633	-0.441423	-0.872651	0.272178	2.33892	-0.679768	-0.0914908	3.78768	0.394079	-0.355532	0.224251
35	-0.255458	0.131616	1.11149	-0.0136099	-0.391745	-0.389581	0.00768406	-0.503258	0.450255	-0.325924	-0.591538	-0.932411	0.660466	0.800134	-0.385595	0.203582	-0.623466	0.708241	0.0575044	0.482502	0.283512	0.606931	-0.57619	0.194838	-0.260408	0.598584	0.104303	0.481379	0.465805	0.352098	0.438327	-0.26374	0.0058841	0.394079	1.03929	-0.36356	0.316995
36	-0.641952	-0.895923	-1.63169	-1.15934	-0.0580377	0.170171	-1.49971	-0.357986	-0.236916	1.87872	1.84285	2.49781	-0.673757	-0.707679	-0.812279	-1.55313	-0.305385	-0.484159	-0.364062	1.1238	-2.21168	-1.5471	0.29663	-1.29544	0.442971	0.324964	-1.00443	0.808626	0.186227	2.46434	-0.467368	2.11303	-0.480258	-0.355532	-0.36356	2.44238	-0.140963
37	-0.0580509	0.0814519	0.438962	0.094903	-0.380614	-0.385369	-0.146779	-0.247311	0.117393	-0.0108088	-0.0286882	-0.36	0.404159	0.472541	-0.19287	-0.019949	-0.206578	0.296486	-0.26944	0.182033	0.114895	0.382937	-0.134153	0.0778363	-0.156749	0.417807	-0.295711	-0.0424941	0.175809	0.0723528	0.13445	-0.209532	0.00768989	0.224251	0.316995	-0.140963	0.185588
38-dimensional	34.7616	-0.621006	-2.8969	-1.97522	1.65794	8.73205	2.43787	-3.18899	0.744049	-1.69353	-4.25567	-6.59978	-1.74708	-5.89128	-4.79805	-2.45289	-1.99333	1.14275	-6.79576	0.113855	-3.02983	3.25807	2.31016	2.74428	-0.455233	-1.04688	1.67814	-2.92575	0.32542	1.16655	-3.2225	-1.88033	0.515963	0.574493	-0.77259	0.960107	0.117813	-0.301794
2	-0.621006	48.4802	0.695674	6.41573	1.49217	-2.7592	-0.221523	-1.38401	-0.207535	-2.60073	1.14304	0.754944	1.20808	4.17429	-0.793363	-1.30544	0.776658	3.51507	0.890362	-2.33533	-1.90371	-1.1444	-2.39518	-5.45119	-2.12355	-0.186542	0.419768	-1.10613	-0.291746	-1.03385	0.883633	1.5394	-1.14316	-0.387475	0.815696	1.38726	-0.225436	0.162153
3	-2.8969	0.695674	23.5203	1.32773	-4.53835	-4.04683	-2.01237	1.563	0.82431	-3.0999	3.55462	1.43429	-1.57568	1.15065	-2.02252	-1.55144	1.55087	0.767358	-4.05655	-2.13805	3.04531	-3.10615	0.373506	1.66539	-3.4223	0.00141035	1.16602	-1.65305	-0.63762	-1.06721	-0.601575	-0.249192	1.08285	0.447001	0.990226	0.0685923	0.261926	-0.556897
4	-1.97522	6.41573	1.32773	42.9736	0.631811	0.511524	-0.696536	1.11861	-3.23023	1.49099	-2.14978	-1.32632	1.41239	-8.43358	-3.52202	-5.51699	1.19346	-0.912196	-1.43269	-0.48985	1.2902	5.41276	-1.60737	0.166659	-1.12489	-0.686797	1.50147	-3.00529	0.418822	1.13946	2.19308	0.390435	0.0703426	-0.856713	-1.17253	0.084854	0.622332	-0.876877
5	1.65794	1.49217	-4.53835	0.631811	20.6383	-2.45604	1.9043	-3.55041	-3.50163	3.00453	0.344079	-6.47943	-0.559788	-10.9805	-1.05778	-1.36408	-6.86839	2.62178	-2.12311	0.868555	-2.92742	-0.724468	0.148084	-4.45339	2.28336	1.19743	2.04718	3.34219	-0.309286	-0.273706	3.08736	-0.597387	0.691609	-1.4879	-0.220049	0.546232	0.0735324	-0.294237
6	8.73205	-2.7592	-4.04683	0.511524	-2.45604	53.3861	5.83446	6.23782	-7.11425	1.16176	-6.70685	-2.97933	0.985765	5.75236	-2.5338	8.46298	1.62117	3.51404	-12.0624	0.190892	4.37357	0.835275	0.238493	0.252184	-3.32157	2.43538	-6.54368	0.0883704	0.0584794	-2.3304	-3.14582	6.03246	-4.2572	1.64317	1.34242	-2.55495	-0.380311	0.992871
7	2.43787	-0.221523	-2.01237	-0.696536	1.9043	5.83446	22.5578	2.21508	-1.05438	-0.380102	3.97634	-1.66007	-4.87542	-8.32487	3.41042	-0.516744	-4.44994	7.80707	-2.20855	0.142084	3.96091	-2.39978	-2.58049	6.65678	-6.42169	0.575621	-1.11536	1.76274	-0.374016	-0.193057	-2.33882	-3.16883	-2.11175	0.350076	1.2455	1.36763	-1.06641	1.79623
8	-3.18899	-1.38401	1.563	1.11861	-3.55041	6.23782	2.21508	19.3845	0.533705	1.58588	-0.584599	6.57897	-1.73564	0.0939101	3.42402	4.81884	-1.96958	3.8578	-3.17704	0.431425	7.09734	-1.08392	0.514445	-0.609681	1.76541	2.89499	-0.852658	-2.51842	0.151629	-0.0456583	-0.887828	-0.971984	0.293503	-0.128118	0.581555	0.510137	0.26785	-0.546674
9	0.744049	-0.207535	0.82431	-3.23023	-3.50163	-7.11425	-1.05438	0.533705	17.531	-0.615485	4.87051	9.45723	-3.55664	7.09739	0.450982	-1.4378	-5.16432	6.97984	-1.17844	3.15429	-4.59411	2.48656	-1.70336	3.37764	4.32036	-1.38349	3.55855	0.377472	-0.467597	0.852273	-1.28194	-3.29468	0.95394	0.0909647	-0.257839	2.58662	-0.188382	-0.164092
10	-1.69353	-2.60073	-3.0999	1.49099	3.00453	1.16176	-0.380102	1.58588	-0.615485	15.0182	-1.95009	6.14996	-2.79218	-6.46124	0.102078	-0.426999	-0.552059	-5.62246	-1.12131	1.89417	-0.551708	3.81612	-3.16568	2.63266	0.380051	1.89185	1.98232	2.23047	0.165548	-0.311789	1.92337	-1.11468	0.672454	-1.66543	-0.23075	-0.688258	0.402408	-0.529994
11	-4.25567	1.14304	3.55462	-2.14978	0.344079	-6.70685	3.97634	-0.584599	4.87051	-1.95009	43.9501	1.84033	-1.25797	-13.532	6.19613	0.482479	-1.86736	-0.656042	9.70966	2.60626	-1.45059	-1.98154	-2.79431	1.31441	2.15624	1.29085	1.65378	2.1198	0.695529	-1.08703	1.04597	-1.78594	0.0653667	-1.12346	1.00695	-1.92577	0.325234	-0.0675989
12	-6.59978	0.754944	1.43429	-1.32632	-6.47943	-2.97933	-1.66007	6.57897	9.45723	6.14996	1.84033	32.2957	0.636261	9.22899	-0.84412	-1.07386	-4.93393	2.11429	-6.17037	1.21449	0.379962	-1.23223	-1.86389	0.331362	2.05369	1.93716	0.455795	-1.32976	1.2738	0.300521	-0.383541	-2.53322	-1.08439	-0.843691	0.606701	0.428658	0.0831162	0.0297382
13	-1.74708	1.20808	-1.57568	1.41239	-0.559788	0.985765	-4.87542	-1.73564	-3.55664	-2.79218	-1.25797	0.636261	16.2983	1.9519	0.716304	3.74746	3.45619	-10.0887	3.20621	-0.634074	-1.1745	-1.21966	3.02424	-2.29326	-1.36347	-2.33852	-2.19922	-1.46548	-0.0479125	-0.732997	0.758038	2.9903	-1.09929	0.479799	0.576679	-0.7252	0.0334332	0.0966387
14	-5.89128	4.17429	1.15065	-8.43358	-10.9805	5.75236	-8.32487	0.0939101	7.09739	-6.46124	-13.532	9.22899	1.9519	54.1789	-2.58807	-2.82316	-1.3669	4.98915	-2.73647	3.05409	1.06057	-5.86426	-0.0956949	-0.0863715	4.69805	-1.42303	-4.25883	-1.25547	-1.76087	-1.62942	-2.87647	3.9741	0.519967	0.454925	0.0819509	0.794872	0.655111	-1.03025
15	-4.79805	-0.793363	-2.02252	-3.52202	-1.05778	-2.5338	3.41042	3.42402	0.450982	0.102078	6.19613	-0.84412	0.716304	-2.58807	10.2439	4.82196	-0.2868	-0.675561	11.0261	1.27222	1.78379	-2.12753	-0.579415	0.693365	-0.688807	1.66276	1.49432	4.22344	1.07937	-0.741784	1.79032	-1.8981	-1.09439	-0.637212	0.973342	-0.244961	-0.278296	0.477696
16	-2.45289	-1.30544	-1.55144	-5.51699	-1.36408	8.46298	-0.516744	4.81884	-1.4378	-0.426999	0.482479	-1.07386	3.74746	-2.82316	4.82196	15.7315	3.76306	-3.15092	-1.34991	0.0266563	-0.52442	-0.665174	1.09224	-2.85729	-1.29728	1.42168	-1.53636	1.53859	-0.0680638	-1.50335	-1.83393	2.86202	-1.53531	1.49488	1.4181	-1.95487	-0.469691	0.953024
17	-1.99333	0.776658	1.55087	1.19346	-6.86839	1.62117	-4.44994	-1.96958	-5.16432	-0.552059	-1.86736	-4.93393	3.45619	-1.3669	-0.2868	3.76306	19.0786	-10.8918	4.35027	-0.644497	0.574885	-1.47915	0.974544	0.987799	-3.58608	-1.37111	-2.58136	-1.85973	-1.80339	-0.554323	-3.69992	4.58842	0.423365	1.54825	-0.26949	-0.135083	0.325837	-0.399846
18	1.14275	3.51507	0.767358	-0.912196	2.62178	3.51404	7.80707	3.8578	6.97984	-5.62246	-0.656042	2.11429	-10.0887	4.98915	-0.675561	-3.15092	-10.8918	30.5457	-5.17068	-0.130693	-1.04082	0.613808	0.213622	-1.39125	-0.780701	1.26679	1.3499	-0.19435	2.12765	-0.351006	-1.22781	-2.58447	-2.38455	0.418137	2.13651	-0.785366	-0.682365	1.32714
19	-6.79576	0.890362	-4.05655	-1.43269	-2.12311	-12.0624	-2.20855	-3.17704	-1.17844	-1.12131	9.70966	-6.17037	3.20621	-2.73647	11.0261	-1.34991	4.35027	-5.17068	28.9102	0.403688	-2.75745	0.904852	-0.514812	-1.82159	0.0295071	0.071427	1.50397	2.9269	1.36593	-0.675037	2.03071	-1.77832	0.584007	-0.414559	1.15988	-0.0165045	0.391188	-0.592427
20	0.113855	-2.33533	-2.13805	-0.48985	0.868555	0.190892	0.142084	0.431425	3.15429	1.89417	2.60626	1.21449	-0.634074	3.05409	1.27222	0.0266563	-0.644497	-0.130693	0.403688	8.93697	-0.134839	2.91442	-2.9606	3.69974	2.95968	0.838928	2.09026	2.04906	1.53506	-0.128259	-0.640774	-0.500863	-1.21043	0.0770865	-0.0203092	-0.53882	0.233388	-0.22453
21	-3.02983	-1.90371	3.04531	1.2902	-2.92742	4.37357	3.96091	7.09734	-4.59411	-0.551708	-1.45059	0.379962	-1.1745	1.06057	1.78379	-0.52442	0.574885	-1.04082	-2.75745	-0.134839	17.4581	-5.12486	-0.818101	1.83372	1.1409	-0.0652948	-2.48657	-0.877921	0.0382822	-0.247256	-0.518932	0.580206	0.0473455	1.14025	0.612339	0.310665	0.232056	-0.416703
22	3.25807	-1.1444	-3.10615	5.41276	-0.724468	0.835275	-2.39978	-1.08392	2.48656	3.81612	-1.98154	-1.23223	-1.21966	-5.86426	-2.12753	-0.665174	-1.47915	0.613808	0.904852	2.91442	-5.12486	16.605	-0.384208	2.42371	-1.37048	3.0244	1.30963	-1.44636	1.47758	0.367781	-0.575398	-1.05684	-2.10263	-0.168291	-0.649783	-2.1595	0.0955532	0.0107305
23	2.31016	-2.39518	0.373506	-1.60737	0.148084	0.238493	-2.58049	0.514445	-1.70336	-3.16568	-2.79431	-1.86389	3.02424	-0.0956949	-0.579415	1.09224	0.974544	0.213622	-0.514812	-2.9606	-0.818101	-0.384208	12.4228	-1.54004	-2.18286	0.783152	-1.09841	-3.94306	-1.13311	0.757739	-1.42508	0.257092	0.760809	-0.435426	-1.60991	0.0460211	0.131141	-0.417583
24	2.74428	-5.45119	1.66539	0.166659	-4.45339	0.252184	6.65678	-0.609681	3.37764	2.63266	1.31441	0.331362	-2.29326	-0.0863715	0.693365	-2.85729	0.987799	-1.39125	-1.82159	3.69974	1.83372	2.42371	-1.54004	14.4284	-2.45554	2.12798	-0.23616	1.66404	0.490864	0.0282707	-2.65739	-2.48515	-0.50823	0.72568	0.735037	-0.55924	0.103396	-0.04586
25	-0.455233	-2.12355	-3.4223	-1.12489	2.28336	-3.32157	-6.42169	1.76541	4.32036	0.380051	2.15624	2.05369	-1.36347	4.69805	-0.688807	-1.29728	-3.58608	-0.780701	0.0295071	2.95968	1.1409	-1.37048	-2.18286	-2.45554	11.7967	-1.05504	-0.054332	-0.529588	-0.644962	1.19894	0.914494	0.196061	2.94148	-0.163694	-1.52664	1.12623	0.706296	-1.36895
26	-1.04688	-0.186542	0.00141035	-0.686797	1.19743	2.43538	0.575621	2.89499	-1.38349	1.89185	1.29085	1.93716	-2.33852	-1.42303	1.66276	1.42168	-1.37111	1.26679	0.071427	0.838928	-0.0652948	3.0244	0.783152	2.12798	-1.05504	8.06009	-0.745641	0.611536	0.335407	-0.505842	-1.08603	-1.17499	-1.74221	-0.647857	0.306158	-1.67765	-0.251774	0.311624
27	1.67814	0.419768	1.16602	1.50147	2.04718	-6.54368	-1.11536	-0.852658	3.55855	1.98232	1.65378	0.455795	-2.19922	-4.25883	1.49432	-1.53636	-2.58136	1.3499	1.50397	2.09026	-2.48657	1.30963	-1.09841	-0.23616	-0.054332	-0.745641	6.53201	1.42802	0.996247	0.417662	1.84096	-2.78397	-0.00830429	-1.2304	-0.332574	0.464962	0.00701553	0.00608733
28	-2.92575	-1.10613	-1.65305	-3.00529	3.34219	0.0883704	1.76274	-2.51842	0.377472	2.23047	2.1198	-1.32976	-1.46548	-1.25547	4.22344	1.53859	-1.85973	-0.19435	2.9269	2.04906	-0.877921	-1.44636	-3.94306	1.66404	-0.529588	0.611536	1.42802	11.7544	2.4367	0.233265	4.43834	-0.0266103	-1.87467	-0.509883	0.314232	-0.129527	-0.526107	0.753508
29	0.32542	-0.291746	-0.63762	0.418822	-0.309286	0.0584794	-0.374016	0.151629	-0.467597	0.165548	0.695529	1.2738	-0.0479125	-1.76087	1.07937	-0.0680638	-1.80339	2.12765	1.36593	1.53506	0.0382822	1.47758	-1.13311	0.490864	-0.644962	0.335407	0.996247	2.4367	6.04407	0.268494	1.38229	-0.621308	-3.33114	1.16805	1.64267	-0.773617	-0.322264	0.709015
30	1.16655	-1.03385	-1.06721	1.13946	-0.273706	-2.3304	-0.193057	-0.0456583	0.852273	-0.311789	-1.08703	0.300521	-0.732997	-1.62942	-0.741784	-1.50335	-0.554323	-0.351006	-0.675037	-0.128259	-0.247256	0.367781	0.757739	0.0282707	1.19894	-0.505842	0.417662	0.233265	0.268494	1.95063	0.292366	-0.921351	0.377103	-0.122376	-0.983371	1.05691	-0.0644908	-0.0964257
31	-3.2225	0.883633	-0.601575	2.19308	3.08736	-3.14582	-2.33882	-0.887828	-1.28194	1.92337	1.04597	-0.383541	0.758038	-2.87647	1.79032	-1.83393	-3.69992	-1.22781	2.03071	-0.640774	-0.518932	-0.575398	-1.42508	-2.65739	0.914494	-1.08603	1.84096	4.43834	1.38229	0.292366	7.00442	0.212385	-0.20093	-2.04575	-1.36897	0.0520047	-0.125015	0.116137
32	-1.88033	1.5394	-0.249192	0.390435	-0.597387	6.03246	-3.16883	-0.971984	-3.29468	-1.11468	-1.78594	-2.53322	2.9903	3.9741	-1.8981	2.86202	4.58842	-2.58447	-1.77832	-0.500863	0.580206	-1.05684	0.257092	-2.48515	0.196061	-1.17499	-2.78397	-0.0266103	-0.621308	-0.921351	0.212385	6.13297	-0.737203	0.846637	-0.808632	-0.738638	0.15708	-0.246762
33	0.515963	-1.14316	1.08285	0.0703426	0.691609	-4.2572	-2.11175	0.293503	0.95394	0.672454	0.0653667	-1.08439	-1.09929	0.519967	-1.09439	-1.53531	0.423365	-2.38455	0.584007	-1.21043	0.0473455	-2.10263	0.760809	-0.50823	2.94148	-1.74221	-0.00830429	-1.87467	-3.33114	0.377103	-0.20093	-0.737203	5.29743	-0.827329	-1.07872	1.16865	0.879356	-1.55074
34	0.574493	-0.387475	0.447001	-0.856713	-1.4879	1.64317	0.350076	-0.128118	0.0909647	-1.66543	-1.12346	-0.843691	0.479799	0.454925	-0.637212	1.49488	1.54825	0.418137	-0.414559	0.0770865	1.14025	-0.168291	-0.435426	0.72568	-0.163694	-0.647857	-1.2304	-0.509883	1.16805	-0.122376	-2.04575	0.846637	-0.827329	1.94555	1.32176	-0.0101849	-0.166431	0.272323
35	-0.77259	0.815696	0.990226	-1.17253	-0.220049	1.34242	1.2455	0.581555	-0.257839	-0.23075	1.00695	0.606701	0.576679	0.0819509	0.973342	1.4181	-0.26949	2.13651	1.15988	-0.0203092	0.612339	-0.649783	-1.60991	0.735037	-1.52664	0.306158	-0.332574	0.314232	1.64267	-0.983371	-1.36897	-0.808632	-1.07872	1.32176	2.70018	-0.72178	-0.142358	0.43608
36	0.960107	1.38726	0.0685923	0.084854	0.546232	-2.55495	1.36763	0.510137	2.58662	-0.688258	-1.92577	0.428658	-0.7252	0.794872	-0.244961	-1.95487	-0.135083	-0.785366	-0.0165045	-0.53882	0.310665	-2.1595	0.0460211	-0.55924	1.12623	-1.67765	0.464962	-0.129527	-0.773617	1.05691	0.0520047	-0.738638	1.16865	-0.0101849	-0.72178	3.28967	-0.0438051	-0.500154
37	0.117813	-0.225436	0.261926	0.622332	0.0735324	-0.380311	-1.06641	0.26785	-0.188382	0.402408	0.325234	0.0831162	0.0334332	0.655111	-0.278296	-0.469691	0.325837	-0.682365	0.391188	0.233388	0.232056	0.0955532	0.131141	0.103396	0.706296	-0.251774	0.00701553	-0.526107	-0.322264	-0.0644908	-0.125015	0.15708	0.879356	-0.166431	-0.142358	-0.0438051	0.438942	-0.656482
38	-0.301794	0.162153	-0.556897	-0.876877	-0.294237	0.992871	1.79623	-0.546674	-0.164092	-0.529994	-0.0675989	0.0297382	0.0966387	-1.03025	0.477696	0.953024	-0.399846	1.32714	-0.592427	-0.22453	-0.416703	0.0107305	-0.417583	-0.04586	-1.36895	0.311624	0.00608733	0.753508	0.709015	-0.0964257	0.116137	-0.246762	-1.55074	0.272323	0.43608	-0.500154	-0.656482	1.13929
39-dimensional	51.6488	8.10759	-1.46674	-0.3576	1.69238	-0.907225	3.7831	-1.78575	4.08499	2.42185	4.46156	-1.08545	-6.21535	0.896713	0.8826	-5.5179	-0.290714	3.89871	10.6054	-0.329298	-2.87384	-0.959477	-1.29681	-1.69907	0.149385	-2.64466	3.06395	3.2543	0.726827	-0.129981	-0.528453	-1.85453	-4.24892	-2.43455	1.59591	-1.45243	0.750853	0.372597	0.174646
2	8.10759	44.5405	-0.214213	0.312069	-4.41198	3.43226	0.0271798	3.54041	0.378653	-4.29799	-2.61035	-4.57545	7.53608	-0.708222	-1.36625	1.07006	-4.74937	0.958741	-1.53809	-2.44467	-0.430178	-3.36979	5.22204	0.324204	-4.12433	1.37544	-2.28894	-2.88618	0.129787	3.27051	4.1169	-0.369062	-0.282428	-0.524215	-1.1914	-1.96297	2.25224	0.631137	-0.562429
3	-1.46674	-0.214213	47.5119	9.30253	0.671287	-4.0206	4.79046	-0.747599	6.04469	-1.28628	-1.39859	11.9727	0.285213	13.2062	0.175698	-0.804278	0.774304	8.25099	1.99675	2.51195	-0.658465	0.0217891	2.44168	2.46563	-0.396776	-2.47635	-2.035	2.4361	-1.59219	-0.677861	-2.66954	-1.7525	0.511175	-0.0656283	0.0379976	0.835055	-1.99549	-0.854548	0.294875
4	-0.3576	0.312069	9.30253	35.1523	1.09842	2.58277	0.701245	2.63147	-1.87218	-1.62369	3.59497	4.55778	1.16398	1.8118	-0.381793	-1.56915	0.294959	1.95898	0.988768	-0.132842	6.51421	-2.38926	1.743	3.49765	-2.6013	-0.0848731	1.59291	-3.3773	0.346052	-1.19669	3.51407	-2.75946	-1.20953	-1.46236	0.346883	-0.254733	-0.953935	-0.484823	0.0152079
5	1.69238	-4.41198	0.671287	1.09842	23.3076	6.0521	3.59764	-4.02628	-0.0338066	-0.89029	-0.677901	0.919122	-7.53588	0.451341	3.23157	2.31766	4.12292	4.98609	-0.159213	-4.86266	3.24909	-1.13412	-6.69368	-7.61457	6.85006	3.56523	3.48027	0.734209	-1.26128	0.00405023	3.56116	2.72817	-2.1867	-0.615949	2.1711	-0.00706924	-1.96192	-0.759861	0.387243
6	-0.907225	3.43226	-4.0206	2.58277	6.0521	37.6185	0.378313	2.3942	-0.388248	-6.41535	5.04077	-0.715433	0.526255	2.35209	2.4268	1.21997	6.93185	-9.0134	0.453181	-3.62932	5.38147	-1.98485	0.97327	-4.66577	6.82408	0.72801	-3.396	-7.39103	-1.29088	3.55448	0.656346	8.00757	1.54153	-0.581758	-2.36425	-0.365719	1.99078	0.624945	-0.362755
7	3.7831	0.0271798	4.79046	0.701245	3.59764	0.378313	16.1585	-1.74516	-1.75631	-1.73983	1.53994	-1.11122	-8.15053	10.5224	2.50221	0.0736481	-0.517809	5.87852	8.07924	-0.186988	2.13816	-1.96137	-1.35143	-5.68782	0.119758	0.462231	1.39158	-0.560305	-0.330559	-0.410794	3.86608	0.76025	-0.146962	0.85824	1.38729	-0.502863	0.145228	0.098902	0.0585084
8	-1.78575	3.54041	-0.747599	2.63147	-4.02628	2.3942	-1.74516	23.7917	-2.72814	-1.33715	4.78125	2.1902	2.02768	-6.24391	2.51444	3.18214	-1.41704	-1.30123	5.77739	0.691461	-0.743108	0.400657	4.54256	1.47389	-4.83251	-0.199193	-0.758479	-6.09355	-1.77091	1.20822	0.720138	-0.372378	2.66363	1.06749	-1.87069	-0.120912	0.697346	-0.0559052	-0.496967
9	4.08499	0.378653	6.04469	-1.87218	-0.0338066	-0.388248	-1.75631	-2.72814	14.3473	0.223081	-4.84483	-1.33125	2.03007	3.32883	2.15834	-6.90994	5.47478	2.4675	-3.00482	-0.14116	-7.51819	-0.284963	-5.13993	1.80573	4.72177	-1.51225	-0.769619	1.54752	1.6916	-0.698225	1.3153	5.12666	0.312022	-2.1335	-0.772343	0.34954	1.05028	0.473421	0.237393
10	2.42185	-4.29799	-1.28628	-1.62369	-0.89029	-6.41535	-1.73983	-1.33715	0.223081	15.7565	-0.614712	1.3667	-0.583503	-3.96773	-2.29473	1.42128	-3.54842	0.872405	2.10093	4.08906	-5.67621	-0.149844	-0.0422395	3.92116	-0.90912	1.08012	4.84807	7.05831	-1.47587	-1.91641	-4.48114	-4.81075	1.48362	2.17389	0.882868	0.37603	-0.721135	-0.167739	0.264513
11	4.46156	-2.61035	-1.39859	3.59497	-0.677901	5.04077	1.53994	4.78125	-4.84483	-0.614712	36.2969	-4.94593	-0.6598	5.9718	0.686872	0.684909	5.8415	-7.13215	7.1124	0.994037	1.90049	2.3357	6.7393	0.861363	-1.43637	-1.43484	-2.36083	-2.65305	-3.40056	1.13014	-5.10716	-1.30419	0.0228613	1.16163	-0.0483748	0.095025	-0.887796	-0.449396	0.0998473
12	-1.08545	-4.57545	11.9727	4.55778	0.919122	-0.715433	-1.11122	2.1902	-1.33125	1.3667	-4.94593	23.8718	-0.878825	2.10055	1.74231	5.06813	-0.865339	0.491283	5.91599	-0.555001	-0.205754	-0.387919	3.02421	0.991546	-4.12664	1.00314	2.74964	0.631055	-0.332262	-0.264853	1.15714	-2.25352	-0.115645	0.28116	-0.0568982	0.0545188	-0.637925	-0.285513	-0.0591687
13	-6.21535	7.53608	0.285213	1.16398	-7.53588	0.526255	-8.15053	2.02768	2.03007	-0.583503	-0.6598	-0.878825	22.7091	-5.51118	-0.668735	4.35065	3.82277	-7.88707	-8.48594	-0.454481	-6.49373	-0.927462	9.57632	9.34545	3.95193	0.293424	0.119877	-0.352242	-0.674943	0.188672	1.67505	-1.07944	1.51606	1.4195	0.923737	-0.452776	0.352336	0.0823815	-0.0238959
14	0.896713	-0.708222	13.2062	1.8118	0.451341	2.35209	10.5224	-6.24391	3.32883	-3.96773	5.9718	2.10055	-5.51118	32.4489	7.12672	-5.20803	2.27682	0.329972	6.79029	-3.35002	1.05996	-2.8025	-1.86336	-1.33282	3.94235	2.79882	-0.668325	-4.07673	2.72394	2.47147	2.04212	2.59168	3.21111	0.762103	-4.59215	1.09533	1.01116	0.162901	-0.273383
15	0.8826	-1.36625	0.175698	-0.381793	3.23157	2.4268	2.50221	2.51444	2.15834	-2.29473	0.686872	1.74231	-0.668735	7.12672	13.201	3.53141	8.68373	1.30794	5.74846	-3.45094	-0.902858	-0.370089	-4.01312	-0.0692529	5.24963	4.08458	1.38582	-5.83339	2.51484	1.07958	4.87567	1.64841	1.35572	1.63174	-0.731853	0.856869	-0.340972	-0.294478	-0.128248
16	-5.5179	1.07006	-0.804278	-1.56915	2.31766	1.21997	0.0736481	3.18214	-6.90994	1.42128	0.684909	5.06813	4.35065	-5.20803	3.53141	21.6004	0.941738	-0.743557	2.25729	-0.0512476	1.0515	0.0861229	3.62519	3.77462	-0.335862	1.83978	1.4422	1.71677	0.73259	-0.324516	4.21792	-4.24059	-0.262239	1.542	1.63777	-0.472005	-0.488588	-0.238791	-0.084718
17	-0.290714	-4.74937	0.774304	0.294959	4.12292	6.93185	-0.517809	-1.41704	5.47478	-3.54842	5.8415	-0.865339	3.82277	2.27682	8.68373	0.941738	20.9835	-4.78302	-2.07182	-2.32451	-1.37646	1.22265	-4.50832	0.0844418	10.5488	1.5651	-0.0614617	-2.94356	-1.15034	-0.940922	0.931568	6.41101	0.662788	-0.260587	0.775334	1.33802	-1.35546	-0.356538	0.322842
18	3.89871	0.958741	8.25099	1.95898	4.98609	-9.0134	5.87852	-1.30123	2.4675	0.872405	-7.13215	0.491283	-7.88707	0.329972	1.30794	-0.743557	-4.78302	26.3519	0.84225	0.31855	1.71272	1.64566	-7.28417	-5.68313	-0.639114	0.512179	1.65296	7.56723	0.939472	-0.809314	2.78735	-3.33551	-2.16442	-1.37629	0.913325	-0.229154	-0.851371	-0.357253	0.0201942
19	10.6054	-1.53809	1.99675	0.988768	-0.159213	0.453181	8.07924	5.77739	-3.00482	2.10093	7.1124	5.91599	-8.48594	6.79029	5.74846	2.25729	-2.07182	0.84225	30.1905	1.34425	2.6264	-0.264984	-1.89234	-4.42387	-8.04244	2.07926	2.44829	-0.179101	-0.39135	2.90789	-1.91154	-4.29167	0.982526	1.2202	-1.69193	-0.901878	0.460014	-0.0743716	-0.414243
20	-0.329298	-2.44467	2.51195	-0.132842	-4.86266	-3.62932	-0.186988	0.691461	-0.14116	4.08906	0.994037	-0.555001	-0.454481	-3.35002	-3.45094	-0.0512476	-2.32451	0.31855	1.34425	11.8395	-1.13098	0.946205	-3.47014	4.94981	-6.63034	-2.9511	0.253679	3.19116	-1.26431	-0.939793	-3.33102	-2.36377	-0.442189	-0.402563	1.10352	-0.142093	-0.37005	-0.0644061	0.154085
21	-2.87384	-0.430178	-0.658465	6.51421	3.24909	5.38147	2.13816	-0.743108	-7.51819	-5.67621	1.90049	-0.205754	-6.49373	1.05996	-0.902858	1.0515	-1.37646	1.71272	2.6264	-1.13098	18.9311	-1.45488	-1.75991	-3.78447	1.98272	1.58302	-3.32595	-4.55932	1.29248	0.917348	1.24534	0.433524	-2.40349	-1.76697	-0.625901	-0.495863	-0.0868307	0.00183451	-0.294766
22	-0.959477	-3.36979	0.0217891	-2.38926	-1.13412	-1.98485	-1.96137	0.400657	-0.284963	-0.149844	2.3357	-0.387919	-0.927462	-2.8025	-0.370089	0.0861229	1.22265	1.64566	-0.264984	0.946205	-1.45488	8.68357	-0.865412	-1.94921	1.22835	-2.15544	-2.06563	2.16541	0.472445	-1.80297	-1.41878	-2.01383	0.528314	0.0471398	0.807762	0.563078	-0.731789	-0.191154	0.0912148
23	-1.29681	5.22204	2.44168	1.743	-6.69368	0.97327	-1.35143	4.54256	-5.13993	-0.0422395	6.7393	3.02421	9.57632	-1.86336	-4.01312	3.62519	-4.50832	-7.28417	-1.89234	-3.47014	-1.75991	-0.865412	21.2076	4.25596	-0.392279	-2.30543	-1.57295	-0.582727	-0.954174	0.53905	-1.02853	-4.29446	0.979365	1.72178	-0.357571	-0.829718	0.713858	0.156566	-0.0595628
24	-1.69907	0.324204	2.46563	3.49765	-7.61457	-4.66577	-5.68782	1.47389	1.80573	3.92116	0.861363	0.991546	9.34545	-1.33282	-0.0692529	3.77462	0.0844418	-5.68313	-4.42387	4.94981	-3.78447	-1.94921	4.25596	17.2829	-0.722521	-0.313148	0.785236	0.0641537	2.51769	-2.65381	1.03666	-2.58739	-0.515218	0.385103	1.65283	0.639921	-0.877561	-0.175351	0.337022
25	0.149385	-4.12433	-0.396776	-2.6013	6.85006	6.82408	0.119758	-4.83251	4.72177	-0.90912	-1.43637	-4.12664	3.95193	3.94235	5.24963	-0.335862	10.5488	-0.639114	-8.04244	-6.63034	1.98272	1.22835	-0.392279	-0.722521	22.3202	1.96747	-0.72317	-2.49215	1.15256	-0.803259	3.8507	5.9486	0.723503	-0.22893	0.277949	0.950226	-0.0276106	0.244565	0.341018
26	-2.64466	1.37544	-2.47635	-0.0848731	3.56523	0.72801	0.462231	-0.199193	-1.51225	1.08012	-1.43484	1.00314	0.293424	2.79882	4.08458	1.83978	1.5651	0.512179	2.07926	-2.9511	1.58302	-2.15544	-2.30543	-0.313148	1.96747	10.2295	1.70763	-3.33709	-3.05689	2.52708	1.40802	2.5517	0.930899	2.63901	0.000528359	0.00664117	-0.8684	-0.281901	-0.161313
27	3.06395	-2.28894	-2.035	1.59291	3.48027	-3.396	1.39158	-0.758479	-0.769619	4.84807	-2.36083	2.74964	0.119877	-0.668325	1.38582	1.4422	-0.0614617	1.65296	2.44829	0.253679	-3.32595	-2.06563	-1.57295	0.785236	-0.72317	1.70763	8.22187	2.02705	-1.27354	-1.65756	-1.06494	-1.2587	0.363559	1.20437	1.42985	0.15386	-0.581753	-0.208847	0.110135
28	3.2543	-2.88618	2.4361	-3.3773	0.734209	-7.39103	-0.560305	-6.09355	1.54752	7.05831	-2.65305	0.631055	-0.352242	-4.07673	-5.83339	1.71677	-2.94356	7.56723	-0.179101	3.19116	-4.55932	2.16541	-0.582727	0.0641537	-2.49215	-3.33709	2.02705	15.1503	-0.237088	-3.24985	-4.59596	-5.15183	-1.43336	-1.28965	1.50373	0.138339	-1.2096	-0.206956	0.467697
29	0.726827	0.129787	-1.59219	0.346052	-1.26128	-1.29088	-0.330559	-1.77091	1.6916	-1.47587	-3.40056	-0.332262	-0.674943	2.72394	2.51484	0.73259	-1.15034	0.939472	-0.39135	-1.26431	1.29248	0.472445	-0.954174	2.51769	1.15256	-3.05689	-1.27354	-0.237088	7.99084	-1.11254	6.1309	-1.08248	-1.41655	-1.81466	-0.314464	-0.166061	1.53699	0.549093	-0.0181633
30	-0.129981	3.27051	-0.677861	-1.19669	0.00405023	3.55448	-0.410794	1.20822	-0.698225	-1.91641	1.13014	-0.264853	0.188672	2.47147	1.07958	-0.324516	-0.940922	-0.809314	2.90789	-0.939793	0.917348	-1.80297	0.53905	-2.65381	-0.803259	2.52708	-1.65756	-3.24985	-1.11254	6.51013	-0.541781	1.59972	0.684966	0.677665	-2.73532	-1.18085	1.5784	0.265027	-0.503369
31	-0.528453	4.1169	-2.66954	3.51407	3.56116	0.656346	3.86608	0.720138	1.3153	-4.48114	-5.10716	1.15714	1.67505	2.04212	4.87567	4.21792	0.931568	2.78735	-1.91154	-3.33102	1.24534	-1.41878	-1.02853	1.03666	3.8507	1.40802	-1.06494	-4.59596	6.1309	-0.541781	15.9341	1.55136	-2.40406	-2.07715	1.45161	-1.40743	1.81762	0.674726	-0.0601731
32	-1.85453	-0.369062	-1.7525	-2.75946	2.72817	8.00757	0.76025	-0.372378	5.12666	-4.81075	-1.30419	-2.25352	-1.07944	2.59168	1.64841	-4.24059	6.41101	-3.33551	-4.29167	-2.36377	0.433524	-2.01383	-4.29446	-2.58739	5.9486	2.5517	-1.2587	-5.15183	-1.08248	1.59972	1.55136	12.169	1.07312	-0.894735	-0.995532	0.43198	1.46897	0.689362	0.0757129
33	-4.24892	-0.282428	0.511175	-1.20953	-2.1867	1.54153	-0.146962	2.66363	0.312022	1.48362	0.0228613	-0.115645	1.51606	3.21111	1.35572	-0.262239	0.662788	-2.16442	0.982526	-0.442189	-2.40349	0.528314	0.979365	-0.515218	0.723503	0.930899	0.363559	-1.43336	-1.41655	0.684966	-2.40406	1.07312	4.18805	1.95024	-2.27276	1.05668	0.117358	-0.106347	-0.150251
34	-2.43455	-0.524215	-0.0656283	-1.46236	-0.615949	-0.581758	0.85824	1.06749	-2.1335	2.17389	1.16163	0.28116	1.4195	0.762103	1.63174	1.542	-0.260587	-1.37629	1.2202	-0.402563	-1.76697	0.0471398	1.72178	0.385103	-0.22893	2.63901	1.20437	-1.28965	-1.81466	0.677665	-2.07715	-0.894735	1.95024	3.54601	0.487829	0.582083	-1.01822	-0.503201	0.00663142
35	1.59591	-1.1914	0.0379976	0.346883	2.1711	-2.36425	1.38729	-1.87069	-0.772343	0.882868	-0.0483748	-0.0568982	0.923737	-4.59215	-0.731853	1.63777	0.775334	0.913325	-1.69193	1.10352	-0.625901	0.807762	-0.357571	1.65283	0.277949	0.000528359	1.42985	1.50373	-0.314464	-2.73532	1.45161	-0.995532	-2.27276	0.487829	4.32506	-0.0977186	-1.51086	-0.332204	0.413822
36	-1.45243	-1.96297	0.835055	-0.254733	-0.00706924	-0.365719	-0.502863	-0.120912	0.34954	0.37603	0.095025	0.0545188	-0.452776	1.09533	0.856869	-0.472005	1.33802	-0.229154	-0.901878	-0.142093	-0.495863	0.563078	-0.829718	0.639921	0.950226	0.00664117	0.15386	0.138339	-0.166061	-1.18085	-1.40743	0.43198	1.05668	0.582083	-0.0977186	1.08932	-0.952382	-0.312583	0.16902
37	0.750853	2.25224	-1.99549	-0.953935	-1.96192	1.99078	0.145228	0.697346	1.05028	-0.721135	-0.887796	-0.637925	0.352336	1.01116	-0.340972	-0.488588	-1.35546	-0.851371	0.460014	-0.37005	-0.0868307	-0.731789	0.713858	-0.877561	-0.0276106	-0.8684	-0.581753	-1.2096	1.53699	1.5784	1.81762	1.46897	0.117358	-1.01822	-1.51086	-0.952382	2.34407	0.799688	-0.307783
38	0.372597	0.631137	-0.854548	-0.484823	-0.759861	0.624945	0.098902	-0.0559052	0.473421	-0.167739	-0.449396	-0.285513	0.0823815	0.162901	-0.294478	-0.238791	-0.356538	-0.357253	-0.0743716	-0.0644061	0.00183451	-0.191154	0.156566	-0.175351	0.244565	-0.281901	-0.208847	-0.206956	0.549093	0.265027	0.674726	0.689362	-0.106347	-0.503201	-0.332204	-0.312583	0.799688	0.325619	-0.0741419
39	0.174646	-0.562429	0.294875	0.0152079	0.387243	-0.362755	0.0585084	-0.496967	0.237393	0.264513	0.0998473	-0.0591687	-0.0238959	-0.273383	-0.128248	-0.084718	0.322842	0.0201942	-0.414243	0.154085	-0.294766	0.0912148	-0.0595628	0.337022	0.341018	-0.161313	0.110135	0.467697	-0.0181633	-0.503369	-0.0601731	0.0757129	-0.150251	0.00663142	0.413822	0.16902	-0.307783	-0.0741419	0.108981
40-dimensional	60.2747	5.66603	-3.0266	4.39485	-0.0944668	-1.02313	-4.491	-4.11351	3.97591	1.78542	-2.9981	3.93039	0.418073	5.0704	3.30045	4.51162	-2.96902	0.86211	-5.49552	-1.51933	-5.72605	-6.21068	2.40009	5.50518	1.23699	1.7029	-4.29089	2.66098	1.33882	3.64144	-2.06748	-1.44866	-0.693623	4.71519	-0.866317	-0.544603	-0.710645	0.0257282	-1.21502
2	5.66603	44.6578	1.88204	-7.42442	0.640372	2.31969	-2.99247	-2.5598	5.29704	-0.711591	1.6156	6.04929	-0.870266	-4.24117	1.64557	-1.83434	3.32483	0.0517819	-7.3144	-0.680014	0.414458	-5.99056	5.14183	4.29746	-2.32785	5.26138	1.41658	2.85409	2.88455	1.70956	-0.974883	-0.981443	-1.63249	1.07992	-1.50726	-3.25861	0.551066	-1.14632	3.1989
3	-3.0266	1.88204	29.8747	-1.29145	-3.38518	0.963239	0.39131	-0.457011	-5.49354	0.97535	-1.91999	-3.57605	4.95964	-4.20866	-0.237476	2.16102	-2.51311	-5.27619	1.13694	-0.800655	4.09551	0.676777	1.30745	3.91021	4.19517	3.79879	1.6664	1.91449	0.210712	0.39801	0.828294	-0.451051	-2.17472	-0.966989	0.482928	0.0485859	0.125237	-0.136988	0.551453
4	4.39485	-7.42442	-1.29145	44.1684	-1.63347	-8.12653	4.54011	3.56743	-4.99039	1.60817	3.07379	4.49101	2.53738	-9.45494	0.0157496	-1.07635	-7.47268	-2.24444	1.43476	2.05001	-1.25031	3.59537	-6.24078	-2.81089	1.87207	-0.58432	-4.72996	2.44212	-1.69929	1.07886	-3.23299	0.410743	2.88003	3.5404	0.0090906	0.521592	-2.98593	-1.09484	-2.36928
5	-0.0944668	0.640372	-3.38518	-1.63347	17.6941	3.94269	-2.59843	1.92668	4.56429	-2.65851	0.608141	1.87432	-6.10907	-5.90049	-1.91392	2.57832	3.02168	6.97272	3.39205	3.28094	-0.591213	1.06524	-1.45453	1.03221	1.54142	-1.97982	3.33909	-1.76661	-3.00718	-0.224027	1.56972	2.13626	1.97093	-1.81725	-1.00336	-2.36934	1.76198	0.554199	1.15597
6	-1.02313	2.31969	0.963239	-8.12653	3.94269	32.1774	-1.29095	0.854371	2.56153	-0.00844969	-0.536466	-3.76708	-1.16047	1.0365	1.46644	2.55875	-1.82633	2.63805	-0.804225	0.351432	5.58366	-2.46273	2.00876	-2.98182	-1.57766	-0.595528	1.0961	1.07746	-0.597532	-2.19096	-0.684322	1.90506	1.03097	0.357874	-0.180826	2.29484	1.16993	1.59658	-1.49633
7	-4.491	-2.99247	0.39131	4.54011	-2.59843	-1.29095	12.9891	1.80021	-3.15772	0.567276	2.35866	-0.729865	-0.317486	-7.12502	0.521311	1.92843	-1.47373	2.0071	0.454978	0.41883	4.51089	3.27267	-4.51252	-3.10326	-4.92644	0.758681	-0.725312	0.882499	1.24488	-2.95295	-0.475514	0.556615	-0.810797	0.445864	0.781548	2.22645	-1.6802	-0.747131	-0.412826
8	-4.11351	-2.5598	-0.457011	3.56743	1.92668	0.854371	1.80021	20.3618	0.24936	2.54936	-4.04135	-0.0991064	0.627304	-9.32161	0.141486	-0.746522	-0.693877	-6.2775	0.479805	2.77686	-2.9488	0.281353	0.290328	-2.43296	-0.436678	-2.51658	1.2254	0.526965	-4.02271	2.258	-0.131766	1.09408	1.93809	1.47565	-0.449193	-0.807284	-0.459178	0.793727	-1.91315
9	3.97591	5.29704	-5.49354	-4.99039	4.56429	2.56153	-3.15772	0.24936	16.9903	1.1278	-8.10541	2.4013	-5.63417	2.00618	1.53136	-0.272145	-0.330645	2.29349	-0.573641	-0.463222	-2.06588	-5.13774	1.06544	-6.42558	-3.78602	-5.32262	-0.513104	-3.31693	1.1149	1.68228	-1.07618	-2.13011	-2.24668	-0.335581	-0.347492	-2.22334	-0.0255893	-0.82866	1.82984
10	1.78542	-0.711591	0.97535	1.60817	-2.65851	-0.00844969	0.567276	2.54936	1.1278	17.0358	-7.63222	4.71785	1.33704	-6.70481	3.06699	5.12628	0.566241	-6.23544	-8.52789	-4.04071	2.41616	0.0850967	-2.1866	-5.16117	3.32455	-2.50159	0.0524902	2.26493	-0.290522	0.72133	-6.20671	-1.36492	0.94509	-0.0752734	0.881727	2.5573	-0.497329	-0.0958998	-1.33383
11	-2.9981	1.6156	-1.91999	3.07379	0.608141	-0.536466	2.35866	-4.04135	-8.10541	-7.63222	17.7195	0.132946	-1.47668	-2.4866	-1.54249	-1.88817	-0.707495	4.24119	3.74206	0.0942375	2.48062	3.59456	1.94319	3.02048	-1.03481	3.0248	-1.27182	-0.123362	0.12605	-2.62918	1.91298	3.4219	1.35292	-0.752893	-0.494339	0.166567	-0.521351	-0.714849	0.742863
12	3.93039	6.04929	-3.57605	4.49101	1.87432	-3.76708	-0.729865	-0.0991064	2.4013	4.71785	0.132946	31.8405	0.555397	-7.25368	-1.25841	-5.6306	1.28626	-11.1089	0.793583	0.255732	-2.45553	-2.0158	1.61077	0.02375	1.81158	1.5132	4.46858	3.68467	-1.23779	1.3276	-4.49117	-2.88698	0.400009	-0.166972	1.24178	-0.940097	-0.553914	-0.446891	-0.0199773
13	0.418073	-0.870266	4.95964	2.53738	-6.10907	-1.16047	-0.317486	0.627304	-5.63417	1.33704	-1.47668	0.555397	12.0514	0.295247	0.71707	-0.827906	1.2822	-5.94039	-2.53039	-1.74536	5.14926	-0.674852	-1.11701	5.42624	0.533971	3.65485	-1.98413	2.7224	0.546932	0.602252	-0.229278	-1.13625	-1.42922	-0.566807	0.207733	0.932885	0.270023	0.295856	-0.0881522
14	5.0704	-4.24117	-4.20866	-9.45494	-5.90049	1.0365	-7.12502	-9.32161	2.00618	-6.70481	-2.4866	-7.25368	0.295247	44.7682	-1.67941	2.77964	-3.0151	-0.93959	3.63917	4.20373	-3.08212	-0.330872	1.39577	2.02528	3.72709	-3.49986	0.265917	-4.34177	-1.95899	1.53171	2.32963	-0.242955	-2.40937	-1.15184	1.1705	-0.723205	0.995051	0.294402	0.00124145
15	3.30045	1.64557	-0.237476	0.0157496	-1.91392	1.46644	0.521311	0.141486	1.53136	3.06699	-1.54249	-1.25841	0.71707	-1.67941	4.47881	2.406	-0.811989	-0.132183	-5.03535	-3.74893	2.38185	-0.918436	0.12463	-2.78009	-1.78899	0.502153	-2.47846	0.476764	1.84083	0.275417	-1.28486	-0.783814	-1.88496	1.0963	0.0896373	1.1727	-0.437114	0.0612671	-0.374312
16	4.51162	-1.83434	2.16102	-1.07635	2.57832	2.55875	1.92843	-0.746522	-0.272145	5.12628	-1.88817	-5.6306	-0.827906	2.77964	2.406	32.0715	-4.59799	2.24208	5.00929	2.34605	2.79142	0.185375	-4.03498	5.87312	4.52611	-3.47497	-3.93626	-2.47126	-1.24839	0.150891	-0.929104	2.66617	-3.19948	-1.05958	2.16678	1.40092	0.488657	1.21672	-1.60427
17	-2.96902	3.32483	-2.51311	-7.47268	3.02168	-1.82633	-1.47373	-0.693877	-0.330645	0.566241	-0.707495	1.28626	1.2822	-3.0151	-0.811989	-4.59799	16.8197	2.1894	-3.02858	-0.968463	5.64551	1.16729	1.54204	2.35261	-2.62553	0.416462	3.98046	-3.31498	0.901876	-2.36822	2.97709	-0.212844	0.696679	-2.53499	-1.93879	-0.669958	1.75175	-0.883502	3.63141
18	0.86211	0.0517819	-5.27619	-2.24444	6.97272	2.63805	2.0071	-6.2775	2.29349	-6.23544	4.24119	-11.1089	-5.94039	-0.93959	-0.132183	2.24208	2.1894	29.1273	-0.210179	-3.50051	5.9599	-1.53091	0.929485	3.52133	-7.22154	0.644964	-2.74241	-4.03723	4.10643	-4.11898	3.61831	1.42773	0.735935	-1.9692	-0.280859	2.14546	-1.04132	-2.93702	3.04287
19	-5.49552	-7.3144	1.13694	1.43476	3.39205	-0.804225	0.454978	0.479805	-0.573641	-8.52789	3.74206	0.793583	-2.53039	3.63917	-5.03535	5.00929	-3.02858	-0.210179	24.9947	5.31894	-1.68539	3.06604	0.553995	6.77524	0.0989657	-3.36635	0.420963	-5.40287	-3.45677	0.932245	3.05597	5.30091	0.231116	-1.36993	1.21078	-2.84995	0.119582	0.164284	0.191565
20	-1.51933	-0.680014	-0.800655	2.05001	3.28094	0.351432	0.41883	2.77686	-0.463222	-4.04071	0.0942375	0.255732	-1.74536	4.20373	-3.74893	2.34605	-0.968463	-3.50051	5.31894	14.8851	-5.19698	-0.369311	-2.52834	1.68177	3.3602	-3.50637	1.22944	-0.889296	-4.03238	1.86784	2.61802	2.92078	-0.0314781	1.94594	0.250935	-1.16912	2.15499	2.23761	-1.92122
21	-5.72605	0.414458	4.09551	-1.25031	-0.591213	5.58366	4.51089	-2.9488	-2.06588	2.41616	2.48062	-2.45553	5.14926	-3.08212	2.38185	2.79142	5.64551	5.9599	-1.68539	-5.19698	27.2557	2.17599	-3.36355	-0.773024	-6.92548	5.1346	0.465188	-1.33429	5.27265	-4.35231	0.645051	0.877322	-3.73404	-4.33359	-0.780864	3.1388	0.426343	-2.89482	5.23225
22	-6.21068	-5.99056	0.676777	3.59537	1.06524	-2.46273	3.27267	0.281353	-5.13774	0.0850967	3.59456	-2.0158	-0.674852	-0.330872	-0.918436	0.185375	1.16729	-1.53091	3.06604	-0.369311	2.17599	16.0087	-5.05743	-4.72438	2.77602	-0.629044	-0.0173445	-3.88774	-2.293	-1.64721	3.14615	3.26684	-0.637866	-4.07426	1.38075	-0.600598	0.664158	0.622498	0.272865
23	2.40009	5.14183	1.30745	-6.24078	-1.45453	2.00876	-4.51252	0.290328	1.06544	-2.1866	1.94319	1.61077	-1.11701	1.39577	0.12463	-4.03498	1.54204	0.929485	0.553995	-2.52834	-3.36355	-5.05743	13.2397	4.34991	-1.60144	2.38394	2.75424	0.801578	0.573493	-0.827447	1.31899	2.38522	2.2556	2.27315	-0.934168	-0.175716	0.248097	0.165716	-0.197577
24	5.50518	4.29746	3.91021	-2.81089	1.03221	-2.98182	-3.10326	-2.43296	-6.42558	-5.16117	3.02048	0.02375	5.42624	2.02528	-2.78009	5.87312	2.35261	3.52133	6.77524	1.68177	-0.773024	-4.72438	4.34991	24.8359	2.88074	4.8068	1.80354	0.795839	0.065839	0.723218	2.06194	3.57742	1.65985	0.808235	-0.588095	-1.5409	1.03898	0.643059	0.0821916
25	1.23699	-2.32785	4.19517	1.87207	1.54142	-1.57766	-4.92644	-0.436678	-3.78602	3.32455	-1.03481	1.81158	0.533971	3.72709	-1.78899	4.52611	-2.62553	-7.22154	0.0989657	3.3602	-6.92548	2.77602	-1.60144	2.88074	12.94	-1.19464	0.708481	2.15266	-4.12777	2.26654	-1.74546	0.295927	1.52103	-0.278426	0.427632	-0.916548	0.845078	1.51689	-1.93293
26	1.7029	5.26138	3.79879	-0.58432	-1.97982	-0.595528	0.758681	-2.51658	-5.32262	-2.50159	3.0248	1.5132	3.65485	-3.49986	0.502153	-3.47497	0.416462	0.644964	-3.36635	-3.50637	5.1346	-0.629044	2.38394	4.8068	-1.19464	13.3933	2.36686	7.22477	3.11349	-0.31001	-1.35131	0.180644	-1.04865	1.87292	-0.465527	0.525866	-0.852912	-0.643172	0.392612
27	-4.29089	1.41658	1.6664	-4.72996	3.33909	1.0961	-0.725312	1.2254	-0.513104	0.0524902	-1.27182	4.46858	-1.98413	0.265917	-2.47846	-3.93626	3.98046	-2.74241	0.420963	1.22944	0.465188	-0.0173445	2.75424	1.80354	0.708481	2.36686	14.5469	1.9447	-2.86602	-0.494805	-0.598584	1.29735	3.5868	-0.696289	-1.35873	-1.83619	2.07555	0.471396	1.11238
28	2.66098	2.85409	1.91449	2.44212	-1.76661	1.07746	0.882499	0.526965	-3.31693	2.26493	-0.123362	3.68467	2.7224	-4.34177	0.476764	-2.47126	-3.31498	-4.03723	-5.40287	-0.889296	-1.33429	-3.88774	0.801578	0.795839	2.15266	7.22477	1.9447	13.3774	-2.11832	1.21259	-6.55835	-2.83282	3.05639	2.67748	0.507653	0.615204	-2.31359	0.129004	-2.93616
29	1.33882	2.88455	0.210712	-1.69929	-3.00718	-0.597532	1.24488	-4.02271	1.1149	-0.290522	0.12605	-1.23779	0.546932	-1.95899	1.84083	-1.24839	0.901876	4.10643	-3.45677	-4.03238	5.27265	-2.293	0.573493	0.065839	-4.12777	3.11349	-2.86602	-2.11832	8.10247	-2.38975	1.80275	-2.00724	-3.49682	0.49802	-0.524622	1.59032	-0.29462	-1.25472	2.38386
30	3.64144	1.70956	0.39801	1.07886	-0.224027	-2.19096	-2.95295	2.258	1.68228	0.72133	-2.62918	1.3276	0.602252	1.53171	0.275417	0.150891	-2.36822	-4.11898	0.932245	1.86784	-4.35231	-1.64721	-0.827447	0.723218	2.26654	-0.31001	-0.494805	1.21259	-2.38975	5.0931	-2.05903	-0.340167	-1.01132	1.38764	0.665045	-1.58625	-0.46532	0.394124	-1.38235
31	-2.06748	-0.974883	0.828294	-3.23299	1.56972	-0.684322	-0.475514	-0.131766	-1.07618	-6.20671	1.91298	-4.49117	-0.229278	2.32963	-1.28486	-0.929104	2.97709	3.61831	3.05597	2.61802	0.645051	3.14615	1.31899	2.06194	-1.74546	-1.35131	-0.598584	-6.55835	1.80275	-2.05903	9.1284	2.78236	-1.96722	-1.95711	-0.545003	-0.695359	3.00682	1.70644	1.47015
32	-1.44866	-0.981443	-0.451051	0.410743	2.13626	1.90506	0.556615	1.09408	-2.13011	-1.36492	3.4219	-2.88698	-1.13625	-0.242955	-0.783814	2.66617	-0.212844	1.42773	5.30091	2.92078	0.877322	3.26684	2.38522	3.57742	0.295927	0.180644	1.29735	-2.83282	-2.00724	-0.340167	2.78236	7.91136	1.84899	0.965714	-0.829731	-0.0728652	2.28081	1.78641	-0.855038
33	-0.693623	-1.63249	-2.17472	2.88003	1.97093	1.03097	-0.810797	1.93809	-2.24668	0.94509	1.35292	0.400009	-1.42922	-2.40937	-1.88496	-3.19948	0.696679	0.735935	0.231116	-0.0314781	-3.73404	-0.637866	2.2556	1.65985	1.52103	-1.04865	3.5868	3.05639	-3.49682	-1.01132	-1.96722	1.84899	8.73812	1.69011	-2.49524	-0.44509	0.0182179	-0.0258474	-0.872061
34	4.71519	1.07992	-0.966989	3.5404	-1.81725	0.357874	0.445864	1.47565	-0.335581	-0.0752734	-0.752893	-0.166972	-0.566807	-1.15184	1.0963	-1.05958	-2.53499	-1.9692	-1.36993	1.94594	-4.33359	-4.07426	2.27315	0.808235	-0.278426	1.87292	-0.696289	2.67748	0.49802	1.38764	-1.95711	0.965714	1.69011	6.26031	-1.60923	0.735992	-0.707896	0.382898	-2.20515
35	-0.866317	-1.50726	0.482928	0.0090906	-1.00336	-0.180826	0.781548	-0.449193	-0.347492	0.881727	-0.494339	1.24178	0.207733	1.1705	0.0896373	2.16678	-1.93879	-0.280859	1.21078	0.250935	-0.780864	1.38075	-0.934168	-0.588095	0.427632	-0.465527	-1.35873	0.507653	-0.524622	0.665045	-0.545003	-0.829731	-2.49524	-1.60923	2.92135	0.544296	-0.928768	0.384187	-1.38909
36	-0.544603	-3.25861	0.0485859	0.521592	-2.36934	2.29484	2.22645	-0.807284	-2.22334	2.5573	0.166567	-0.940097	0.932885	-0.723205	1.1727	1.40092	-0.669958	2.14546	-2.84995	-1.16912	3.1388	-0.600598	-0.175716	-1.5409	-0.916548	0.525866	-1.83619	0.615204	1.59032	-1.58625	-0.695359	-0.0728652	-0.44509	0.735992	0.544296	3.53488	-0.173379	0.243271	-1.21629
37	-0.710645	0.551066	0.125237	-2.98593	1.76198	1.16993	-1.6802	-0.459178	-0.0255893	-0.497329	-0.521351	-0.553914	0.270023	0.995051	-0.437114	0.488657	1.75175	-1.04132	0.119582	2.15499	0.426343	0.664158	0.248097	1.03898	0.845078	-0.852912	2.07555	-2.31359	-0.29462	-0.46532	3.00682	2.28081	0.0182179	-0.707896	-0.928768	-0.173379	3.30852	1.96029	0.482506
38	0.0257282	-1.14632	-0.136988	-1.09484	0.554199	1.59658	-0.747131	0.793727	-0.82866	-0.0958998	-0.714849	-0.446891	0.295856	0.294402	0.0612671	1.21672	-0.883502	-2.93702	0.164284	2.23761	-2.89482	0.622498	0.165716	0.643059	1.51689	-0.643172	0.471396	0.129004	-1.25472	0.394124	1.70644	1.78641	-0.0258474	0.382898	0.384187	0.243271	1.96029	2.70248	-1.98553
39	-1.21502	3.1989	0.551453	-2.36928	1.15597	-1.49633	-0.412826	-1.91315	1.82984	-1.33383	0.742863	-0.0199773	-0.0881522	0.00124145	-0.374312	-1.60427	3.63141	3.04287	0.191565	-1.92122	5.23225	0.272865	-0.197577	0.0821916	-1.93293	0.392612	1.11238	-2.93616	2.38386	-1.38235	1.47015	-0.855038	-0.872061	-2.20515	-1.38909	-1.21629	0.482506	-1.98553	4.08058
40	-0.0948345	-0.492814	0.00496163	0.261938	-0.200851	0.17761	0.25258	0.146607	-0.240899	0.262051	-0.0468054	0.0729453	0.011051	0.0955958	0.0287023	0.400764	-0.438766	-0.260238	0.0443689	0.275895	-0.283548	0.072678	-0.120049	-0.181248	0.194284	-0.0472527	-0.189673	0.331053	-0.246318	0.112042	-0.27249	0.0276146	-0.108669	0.123404	0.307951	0.239398	-0.151239	0.139538	-0.446583
