# Supplementary material for: Improved GNSS integer ambiguity resolution method based on the column oriented Cholesky decomposition
Source: Research Square preprint supplement (doi:10.21203/rs.3.rs-2360038/v1), 2022-12-20
Supplement: Supplementary file 6 [file Figure 3-simulation4.xlsx]

## Sheet: Sheet1
Floating point solution a	130.331	-82.1261	-104.506	18.2593	-67.5083
Floating point solution a	130.331	-82.1261	-104.506	18.2593	-67.5083	224.523
Floating point solution a	130.331	-82.1261	-104.506	18.2593	-67.5083	224.523	10.6306
Floating point solution a	130.331	-82.1261	-104.506	18.2593	-67.5083	224.523	10.6306	131.873
Floating point solution a	130.331	-82.1261	-104.506	18.2593	-67.5083	224.523	10.6306	131.873	21.5575
Floating point solution a	130.331	-82.1261	-104.506	18.2593	-67.5083	224.523	10.6306	131.873	21.5575	88.5844
Floating point solution a	130.331	-82.1261	-104.506	18.2593	-67.5083	224.523	10.6306	131.873	21.5575	88.5844	201.085
Floating point solution a	130.331	-82.1261	-104.506	18.2593	-67.5083	224.523	10.6306	131.873	21.5575	88.5844	201.085	-2.8455
Floating point solution a	130.331	-82.1261	-104.506	18.2593	-67.5083	224.523	10.6306	131.873	21.5575	88.5844	201.085	-2.8455	63.5165
Floating point solution a	130.331	-82.1261	-104.506	18.2593	-67.5083	224.523	10.6306	131.873	21.5575	88.5844	201.085	-2.8455	63.5165	68.8538
Floating point solution a	130.331	-82.1261	-104.506	18.2593	-67.5083	224.523	10.6306	131.873	21.5575	88.5844	201.085	-2.8455	63.5165	68.8538	127.597
Floating point solution a	130.331	-82.1261	-104.506	18.2593	-67.5083	224.523	10.6306	131.873	21.5575	88.5844	201.085	-2.8455	63.5165	68.8538	127.597	26.5142
Floating point solution a	130.331	-82.1261	-104.506	18.2593	-67.5083	224.523	10.6306	131.873	21.5575	88.5844	201.085	-2.8455	63.5165	68.8538	127.597	26.5142	-106.641
Floating point solution a	130.331	-82.1261	-104.506	18.2593	-67.5083	224.523	10.6306	131.873	21.5575	88.5844	201.085	-2.8455	63.5165	68.8538	127.597	26.5142	-106.641	78.0602
Floating point solution a	130.331	-82.1261	-104.506	18.2593	-67.5083	224.523	10.6306	131.873	21.5575	88.5844	201.085	-2.8455	63.5165	68.8538	127.597	26.5142	-106.641	78.0602	-122.588
Floating point solution a	130.331	-82.1261	-104.506	18.2593	-67.5083	224.523	10.6306	131.873	21.5575	88.5844	201.085	-2.8455	63.5165	68.8538	127.597	26.5142	-106.641	78.0602	-122.588	34.9073
Floating point solution a	130.331	-82.1261	-104.506	18.2593	-67.5083	224.523	10.6306	131.873	21.5575	88.5844	201.085	-2.8455	63.5165	68.8538	127.597	26.5142	-106.641	78.0602	-122.588	34.9073	-12.3672
Floating point solution a	130.331	-82.1261	-104.506	18.2593	-67.5083	224.523	10.6306	131.873	21.5575	88.5844	201.085	-2.8455	63.5165	68.8538	127.597	26.5142	-106.641	78.0602	-122.588	34.9073	-12.3672	75.1373
Floating point solution a	130.331	-82.1261	-104.506	18.2593	-67.5083	224.523	10.6306	131.873	21.5575	88.5844	201.085	-2.8455	63.5165	68.8538	127.597	26.5142	-106.641	78.0602	-122.588	34.9073	-12.3672	75.1373	101.628
Floating point solution a	130.331	-82.1261	-104.506	18.2593	-67.5083	224.523	10.6306	131.873	21.5575	88.5844	201.085	-2.8455	63.5165	68.8538	127.597	26.5142	-106.641	78.0602	-122.588	34.9073	-12.3672	75.1373	101.628	-57.3793
Floating point solution a	130.331	-82.1261	-104.506	18.2593	-67.5083	224.523	10.6306	131.873	21.5575	88.5844	201.085	-2.8455	63.5165	68.8538	127.597	26.5142	-106.641	78.0602	-122.588	34.9073	-12.3672	75.1373	101.628	-57.3793	-23.3895
Floating point solution a	130.331	-82.1261	-104.506	18.2593	-67.5083	224.523	10.6306	131.873	21.5575	88.5844	201.085	-2.8455	63.5165	68.8538	127.597	26.5142	-106.641	78.0602	-122.588	34.9073	-12.3672	75.1373	101.628	-57.3793	-23.3895	43.6551
Floating point solution a	130.331	-82.1261	-104.506	18.2593	-67.5083	224.523	10.6306	131.873	21.5575	88.5844	201.085	-2.8455	63.5165	68.8538	127.597	26.5142	-106.641	78.0602	-122.588	34.9073	-12.3672	75.1373	101.628	-57.3793	-23.3895	43.6551	-67.5227
Floating point solution a	130.331	-82.1261	-104.506	18.2593	-67.5083	224.523	10.6306	131.873	21.5575	88.5844	201.085	-2.8455	63.5165	68.8538	127.597	26.5142	-106.641	78.0602	-122.588	34.9073	-12.3672	75.1373	101.628	-57.3793	-23.3895	43.6551	-67.5227	80.2545
Floating point solution a	130.331	-82.1261	-104.506	18.2593	-67.5083	224.523	10.6306	131.873	21.5575	88.5844	201.085	-2.8455	63.5165	68.8538	127.597	26.5142	-106.641	78.0602	-122.588	34.9073	-12.3672	75.1373	101.628	-57.3793	-23.3895	43.6551	-67.5227	80.2545	-31.2372
Floating point solution a	130.331	-82.1261	-104.506	18.2593	-67.5083	224.523	10.6306	131.873	21.5575	88.5844	201.085	-2.8455	63.5165	68.8538	127.597	26.5142	-106.641	78.0602	-122.588	34.9073	-12.3672	75.1373	101.628	-57.3793	-23.3895	43.6551	-67.5227	80.2545	-31.2372	-4.2215
Floating point solution a	130.331	-82.1261	-104.506	18.2593	-67.5083	224.523	10.6306	131.873	21.5575	88.5844	201.085	-2.8455	63.5165	68.8538	127.597	26.5142	-106.641	78.0602	-122.588	34.9073	-12.3672	75.1373	101.628	-57.3793	-23.3895	43.6551	-67.5227	80.2545	-31.2372	-4.2215	25.7881
Floating point solution a	130.331	-82.1261	-104.506	18.2593	-67.5083	224.523	10.6306	131.873	21.5575	88.5844	201.085	-2.8455	63.5165	68.8538	127.597	26.5142	-106.641	78.0602	-122.588	34.9073	-12.3672	75.1373	101.628	-57.3793	-23.3895	43.6551	-67.5227	80.2545	-31.2372	-4.2215	25.7881	-25.3744
Floating point solution a	130.331	-82.1261	-104.506	18.2593	-67.5083	224.523	10.6306	131.873	21.5575	88.5844	201.085	-2.8455	63.5165	68.8538	127.597	26.5142	-106.641	78.0602	-122.588	34.9073	-12.3672	75.1373	101.628	-57.3793	-23.3895	43.6551	-67.5227	80.2545	-31.2372	-4.2215	25.7881	-25.3744	-31.2344
Floating point solution a	130.331	-82.1261	-104.506	18.2593	-67.5083	224.523	10.6306	131.873	21.5575	88.5844	201.085	-2.8455	63.5165	68.8538	127.597	26.5142	-106.641	78.0602	-122.588	34.9073	-12.3672	75.1373	101.628	-57.3793	-23.3895	43.6551	-67.5227	80.2545	-31.2372	-4.2215	25.7881	-25.3744	-31.2344	-20.0177
Floating point solution a	130.331	-82.1261	-104.506	18.2593	-67.5083	224.523	10.6306	131.873	21.5575	88.5844	201.085	-2.8455	63.5165	68.8538	127.597	26.5142	-106.641	78.0602	-122.588	34.9073	-12.3672	75.1373	101.628	-57.3793	-23.3895	43.6551	-67.5227	80.2545	-31.2372	-4.2215	25.7881	-25.3744	-31.2344	-20.0177	50.8824
Floating point solution a	130.331	-82.1261	-104.506	18.2593	-67.5083	224.523	10.6306	131.873	21.5575	88.5844	201.085	-2.8455	63.5165	68.8538	127.597	26.5142	-106.641	78.0602	-122.588	34.9073	-12.3672	75.1373	101.628	-57.3793	-23.3895	43.6551	-67.5227	80.2545	-31.2372	-4.2215	25.7881	-25.3744	-31.2344	-20.0177	50.8824	-148.403
Floating point solution a	130.331	-82.1261	-104.506	18.2593	-67.5083	224.523	10.6306	131.873	21.5575	88.5844	201.085	-2.8455	63.5165	68.8538	127.597	26.5142	-106.641	78.0602	-122.588	34.9073	-12.3672	75.1373	101.628	-57.3793	-23.3895	43.6551	-67.5227	80.2545	-31.2372	-4.2215	25.7881	-25.3744	-31.2344	-20.0177	50.8824	-148.403	-93.933
Floating point solution a	130.331	-82.1261	-104.506	18.2593	-67.5083	224.523	10.6306	131.873	21.5575	88.5844	201.085	-2.8455	63.5165	68.8538	127.597	26.5142	-106.641	78.0602	-122.588	34.9073	-12.3672	75.1373	101.628	-57.3793	-23.3895	43.6551	-67.5227	80.2545	-31.2372	-4.2215	25.7881	-25.3744	-31.2344	-20.0177	50.8824	-148.403	-93.933	38.7282
Floating point solution a	130.331	-82.1261	-104.506	18.2593	-67.5083	224.523	10.6306	131.873	21.5575	88.5844	201.085	-2.8455	63.5165	68.8538	127.597	26.5142	-106.641	78.0602	-122.588	34.9073	-12.3672	75.1373	101.628	-57.3793	-23.3895	43.6551	-67.5227	80.2545	-31.2372	-4.2215	25.7881	-25.3744	-31.2344	-20.0177	50.8824	-148.403	-93.933	38.7282	93.2062
Floating point solution a	130.331	-82.1261	-104.506	18.2593	-67.5083	224.523	10.6306	131.873	21.5575	88.5844	201.085	-2.8455	63.5165	68.8538	127.597	26.5142	-106.641	78.0602	-122.588	34.9073	-12.3672	75.1373	101.628	-57.3793	-23.3895	43.6551	-67.5227	80.2545	-31.2372	-4.2215	25.7881	-25.3744	-31.2344	-20.0177	50.8824	-148.403	-93.933	38.7282	93.2062	57.9972
0.420448	0	0	0	0	0	0	0	0	0	0	0	0	0	0	0	0	0	0	0	0	0	0	0	0	0	0	0	0	0	0	0	0	0	0	0	0	0	0	0	5-dimensional	7.99459	-6.83397	-1.03418	0.185022	0.802549
0	0.79423	0	0	0	0	0	0	0	0	0	0	0	0	0	0	0	0	0	0	0	0	0	0	0	0	0	0	0	0	0	0	0	0	0	0	0	0	0	0	2	-6.83397	11.9436	-1.61519	-0.405817	-1.64223
0	0	0.705787	0	0	0	0	0	0	0	0	0	0	0	0	0	0	0	0	0	0	0	0	0	0	0	0	0	0	0	0	0	0	0	0	0	0	0	0	0	3	-1.03418	-1.61519	3.18778	-0.59316	1.22364
0	0	0	1.56594	0	0	0	0	0	0	0	0	0	0	0	0	0	0	0	0	0	0	0	0	0	0	0	0	0	0	0	0	0	0	0	0	0	0	0	0	4	0.185022	-0.405817	-0.59316	0.748449	-0.0902538
0	0	0	0	2.37841	0	0	0	0	0	0	0	0	0	0	0	0	0	0	0	0	0	0	0	0	0	0	0	0	0	0	0	0	0	0	0	0	0	0	0	5	0.802549	-1.64223	1.22364	-0.0902538	0.813118
0.353553	0	0	0	0	0	0	0	0	0	0	0	0	0	0	0	0	0	0	0	0	0	0	0	0	0	0	0	0	0	0	0	0	0	0	0	0	0	0	0	6-dimensional	9.24247	-2.2097	-2.06373	-6.17772	-3.59137	4.72289
0	0.535114	0	0	0	0	0	0	0	0	0	0	0	0	0	0	0	0	0	0	0	0	0	0	0	0	0	0	0	0	0	0	0	0	0	0	0	0	0	0	2	-2.2097	8.20156	-5.37828	-0.264598	-5.27716	0.352815
0	0	2.38871	0	0	0	0	0	0	0	0	0	0	0	0	0	0	0	0	0	0	0	0	0	0	0	0	0	0	0	0	0	0	0	0	0	0	0	0	0	3	-2.06373	-5.37828	9.1936	4.5233	2.7601	-0.918752
0	0	0	2.14265	0	0	0	0	0	0	0	0	0	0	0	0	0	0	0	0	0	0	0	0	0	0	0	0	0	0	0	0	0	0	0	0	0	0	0	0	4	-6.17772	-0.264598	4.5233	8.39419	2.39032	0.119935
0	0	0	0	2.64494	0	0	0	0	0	0	0	0	0	0	0	0	0	0	0	0	0	0	0	0	0	0	0	0	0	0	0	0	0	0	0	0	0	0	0	5	-3.59137	-5.27716	2.7601	2.39032	23.1283	-5.37716
0	0	0	0	0	2.82843	0	0	0	0	0	0	0	0	0	0	0	0	0	0	0	0	0	0	0	0	0	0	0	0	0	0	0	0	0	0	0	0	0	0	6	4.72289	0.352815	-0.918752	0.119935	-5.37716	8.26147
0.297302	0	0	0	0	0	0	0	0	0	0	0	0	0	0	0	0	0	0	0	0	0	0	0	0	0	0	0	0	0	0	0	0	0	0	0	0	0	0	0	7-dimensional	12.0808	-3.05931	-2.77923	-0.183388	-1.19288	-0.801968	-5.32234
0	1.80787	0	0	0	0	0	0	0	0	0	0	0	0	0	0	0	0	0	0	0	0	0	0	0	0	0	0	0	0	0	0	0	0	0	0	0	0	0	0	2	-3.05931	17.6972	1.47944	0.171275	-5.1866	-0.434743	-2.64284
0	0	2.30536	0	0	0	0	0	0	0	0	0	0	0	0	0	0	0	0	0	0	0	0	0	0	0	0	0	0	0	0	0	0	0	0	0	0	0	0	0	3	-2.77923	1.47944	27.0693	1.92636	13.1798	1.14867	-2.88753
0	0	0	3.02667	0	0	0	0	0	0	0	0	0	0	0	0	0	0	0	0	0	0	0	0	0	0	0	0	0	0	0	0	0	0	0	0	0	0	0	0	4	-0.183388	0.171275	1.92636	12.9521	2.77824	-1.56169	-3.63544
0	0	0	0	1.94857	0	0	0	0	0	0	0	0	0	0	0	0	0	0	0	0	0	0	0	0	0	0	0	0	0	0	0	0	0	0	0	0	0	0	0	5	-1.19288	-5.1866	13.1798	2.77824	19.9923	2.59923	-3.96905
0	0	0	0	0	1.16262	0	0	0	0	0	0	0	0	0	0	0	0	0	0	0	0	0	0	0	0	0	0	0	0	0	0	0	0	0	0	0	0	0	0	6	-0.801968	-0.434743	1.14867	-1.56169	2.59923	1.95785	-0.121412
0	0	0	0	0	0	3.36359	0	0	0	0	0	0	0	0	0	0	0	0	0	0	0	0	0	0	0	0	0	0	0	0	0	0	0	0	0	0	0	0	0	7	-5.32234	-2.64284	-2.88753	-3.63544	-3.96905	-0.121412	7.56969
0.25	0	0	0	0	0	0	0	0	0	0	0	0	0	0	0	0	0	0	0	0	0	0	0	0	0	0	0	0	0	0	0	0	0	0	0	0	0	0	0	8-dimensional	6.01062	-1.6748	2.62793	-1.86311	8.28049	-3.63947	-0.28954	1.08092
0	3.90984	0	0	0	0	0	0	0	0	0	0	0	0	0	0	0	0	0	0	0	0	0	0	0	0	0	0	0	0	0	0	0	0	0	0	0	0	0	0	2	-1.6748	39.1161	-2.89273	-2.51751	-3.96176	1.53144	1.07984	0.149867
0	0	0.386596	0	0	0	0	0	0	0	0	0	0	0	0	0	0	0	0	0	0	0	0	0	0	0	0	0	0	0	0	0	0	0	0	0	0	0	0	0	3	2.62793	-2.89273	10.2345	5.01607	6.92481	2.13601	1.46761	-0.292224
0	0	0	1.47342	0	0	0	0	0	0	0	0	0	0	0	0	0	0	0	0	0	0	0	0	0	0	0	0	0	0	0	0	0	0	0	0	0	0	0	0	4	-1.86311	-2.51751	5.01607	12.2273	-2.72536	4.81625	0.839997	-1.11253
0	0	0	0	3.8988	0	0	0	0	0	0	0	0	0	0	0	0	0	0	0	0	0	0	0	0	0	0	0	0	0	0	0	0	0	0	0	0	0	0	0	5	8.28049	-3.96176	6.92481	-2.72536	17.646	-4.99042	-2.12093	1.61379
0	0	0	0	0	1.61887	0	0	0	0	0	0	0	0	0	0	0	0	0	0	0	0	0	0	0	0	0	0	0	0	0	0	0	0	0	0	0	0	0	0	6	-3.63947	1.53144	2.13601	4.81625	-4.99042	7.75367	1.86285	-1.25556
0	0	0	0	0	0	1.40931	0	0	0	0	0	0	0	0	0	0	0	0	0	0	0	0	0	0	0	0	0	0	0	0	0	0	0	0	0	0	0	0	0	7	-0.28954	1.07984	1.46761	0.839997	-2.12093	1.86285	2.65633	-0.288567
0	0	0	0	0	0	0	4	0	0	0	0	0	0	0	0	0	0	0	0	0	0	0	0	0	0	0	0	0	0	0	0	0	0	0	0	0	0	0	0	8	1.08092	0.149867	-0.292224	-1.11253	1.61379	-1.25556	-0.288567	0.389299
0.210224	0	0	0	0	0	0	0	0	0	0	0	0	0	0	0	0	0	0	0	0	0	0	0	0	0	0	0	0	0	0	0	0	0	0	0	0	0	0	0	9-dimensional	23.6124	-17.0798	-38.038	-0.849126	-4.02901	-10.8949	-3.12011	-0.548113	-0.361631
0	0.759965	0	0	0	0	0	0	0	0	0	0	0	0	0	0	0	0	0	0	0	0	0	0	0	0	0	0	0	0	0	0	0	0	0	0	0	0	0	0	2	-17.0798	44.1879	26.1261	-4.94444	3.92891	8.32869	0.940824	-5.26304	2.20828
0	0	4.37385	0	0	0	0	0	0	0	0	0	0	0	0	0	0	0	0	0	0	0	0	0	0	0	0	0	0	0	0	0	0	0	0	0	0	0	0	0	3	-38.038	26.1261	76.4459	-2.21579	10.289	12.0678	12.1081	3.83228	-0.445257
0	0	0	0.82619	0	0	0	0	0	0	0	0	0	0	0	0	0	0	0	0	0	0	0	0	0	0	0	0	0	0	0	0	0	0	0	0	0	0	0	0	4	-0.849126	-4.94444	-2.21579	7.88477	0.37331	7.44785	-5.28435	-0.0884379	-0.137968
0	0	0	0	1.72023	0	0	0	0	0	0	0	0	0	0	0	0	0	0	0	0	0	0	0	0	0	0	0	0	0	0	0	0	0	0	0	0	0	0	0	5	-4.02901	3.92891	10.289	0.37331	20.2054	6.86447	5.25435	-1.27149	0.370341
0	0	0	0	0	4.29071	0	0	0	0	0	0	0	0	0	0	0	0	0	0	0	0	0	0	0	0	0	0	0	0	0	0	0	0	0	0	0	0	0	0	6	-10.8949	8.32869	12.0678	7.44785	6.86447	29.7082	-5.0281	-0.0600154	-0.204901
0	0	0	0	0	0	2.48193	0	0	0	0	0	0	0	0	0	0	0	0	0	0	0	0	0	0	0	0	0	0	0	0	0	0	0	0	0	0	0	0	0	7	-3.12011	0.940824	12.1081	-5.28435	5.25435	-5.0281	16.464	4.1704	-0.543304
0	0	0	0	0	0	0	3.0077	0	0	0	0	0	0	0	0	0	0	0	0	0	0	0	0	0	0	0	0	0	0	0	0	0	0	0	0	0	0	0	0	8	-0.548113	-5.26304	3.83228	-0.0884379	-1.27149	-0.0600154	4.1704	6.63273	-1.23485
0	0	0	0	0	0	0	0	4.75683	0	0	0	0	0	0	0	0	0	0	0	0	0	0	0	0	0	0	0	0	0	0	0	0	0	0	0	0	0	0	0	9	-0.361631	2.20828	-0.445257	-0.137968	0.370341	-0.204901	-0.543304	-1.23485	0.450425
0.176777	0	0	0	0	0	0	0	0	0	0	0	0	0	0	0	0	0	0	0	0	0	0	0	0	0	0	0	0	0	0	0	0	0	0	0	0	0	0	0	10-dimensional	26.737	18.5996	13.1279	-10.8169	-8.17884	13.8458	9.81906	-0.120634	8.32517
0	3.37239	0	0	0	0	0	0	0	0	0	0	0	0	0	0	0	0	0	0	0	0	0	0	0	0	0	0	0	0	0	0	0	0	0	0	0	0	0	0	2	18.5996	41.1365	4.04225	-4.50584	1.77022	7.7774	7.18089	1.26579	-0.672895
0	0	4.00326	0	0	0	0	0	0	0	0	0	0	0	0	0	0	0	0	0	0	0	0	0	0	0	0	0	0	0	0	0	0	0	0	0	0	0	0	0	3	13.1279	4.04225	61.137	-6.4687	-10.0301	11.665	6.48224	-9.51011	7.59715
0	0	0	0.33752	0	0	0	0	0	0	0	0	0	0	0	0	0	0	0	0	0	0	0	0	0	0	0	0	0	0	0	0	0	0	0	0	0	0	0	0	4	-10.8169	-4.50584	-6.4687	8.12192	-0.0937508	-6.11356	-9.37524	-0.523835	-4.26918
0	0	0	0	3.06961	0	0	0	0	0	0	0	0	0	0	0	0	0	0	0	0	0	0	0	0	0	0	0	0	0	0	0	0	0	0	0	0	0	0	0	5	-8.17884	1.77022	-10.0301	-0.0937508	25.3266	-3.82417	8.52035	3.40091	-5.02581
0	0	0	0	0	0.352538	0	0	0	0	0	0	0	0	0	0	0	0	0	0	0	0	0	0	0	0	0	0	0	0	0	0	0	0	0	0	0	0	0	0	6	13.8458	7.7774	11.665	-6.11356	-3.82417	40.0478	11.387	2.27437	-13.2763
0	0	0	0	0	0	4.70958	0	0	0	0	0	0	0	0	0	0	0	0	0	0	0	0	0	0	0	0	0	0	0	0	0	0	0	0	0	0	0	0	0	7	9.81906	7.18089	6.48224	-9.37524	8.52035	11.387	16.701	-0.665005	-0.156477
0	0	0	0	0	0	0	2.03993	0	0	0	0	0	0	0	0	0	0	0	0	0	0	0	0	0	0	0	0	0	0	0	0	0	0	0	0	0	0	0	0	8	-0.120634	1.26579	-9.51011	-0.523835	3.40091	2.27437	-0.665005	11.0348	-2.56383
0	0	0	0	0	0	0	0	4.81682	0	0	0	0	0	0	0	0	0	0	0	0	0	0	0	0	0	0	0	0	0	0	0	0	0	0	0	0	0	0	0	9	8.32517	-0.672895	7.59715	-4.26918	-5.02581	-13.2763	-0.156477	-2.56383	15.9441
0	0	0	0	0	0	0	0	0	5.65685	0	0	0	0	0	0	0	0	0	0	0	0	0	0	0	0	0	0	0	0	0	0	0	0	0	0	0	0	0	0	10	-4.25756	0.811118	-4.90149	0.498793	6.40627	0.7714	2.85409	0.883756	-4.85825
0.148651	0	0	0	0	0	0	0	0	0	0	0	0	0	0	0	0	0	0	0	0	0	0	0	0	0	0	0	0	0	0	0	0	0	0	0	0	0	0	0	11-dimensional	11.8515	-0.339369	-6.07279	11.348	1.2813	10.914	14.5851	2.54193	-2.29647
0	1.76742	0	0	0	0	0	0	0	0	0	0	0	0	0	0	0	0	0	0	0	0	0	0	0	0	0	0	0	0	0	0	0	0	0	0	0	0	0	0	2	-0.339369	19.9647	-0.986336	0.436248	2.24343	5.54377	6.87203	0.794581	-2.82025
0	0	3.974	0	0	0	0	0	0	0	0	0	0	0	0	0	0	0	0	0	0	0	0	0	0	0	0	0	0	0	0	0	0	0	0	0	0	0	0	0	3	-6.07279	-0.986336	34.6707	-22.9807	-2.91674	-1.63009	7.23366	-6.40436	-0.292736
0	0	0	6.31718	0	0	0	0	0	0	0	0	0	0	0	0	0	0	0	0	0	0	0	0	0	0	0	0	0	0	0	0	0	0	0	0	0	0	0	0	4	11.348	0.436248	-22.9807	70.8391	9.31374	8.80987	-3.34286	21.1853	3.57293
0	0	0	0	0.463021	0	0	0	0	0	0	0	0	0	0	0	0	0	0	0	0	0	0	0	0	0	0	0	0	0	0	0	0	0	0	0	0	0	0	0	5	1.2813	2.24343	-2.91674	9.31374	6.0892	2.41037	-0.00590044	3.81661	0.882796
0	0	0	0	0	0.503744	0	0	0	0	0	0	0	0	0	0	0	0	0	0	0	0	0	0	0	0	0	0	0	0	0	0	0	0	0	0	0	0	0	0	6	10.914	5.54377	-1.63009	8.80987	2.41037	17.3615	17.7089	2.86289	-0.710592
0	0	0	0	0	0	0.284287	0	0	0	0	0	0	0	0	0	0	0	0	0	0	0	0	0	0	0	0	0	0	0	0	0	0	0	0	0	0	0	0	0	7	14.5851	6.87203	7.23366	-3.34286	-0.00590044	17.7089	35.5135	-1.44431	-5.39812
0	0	0	0	0	0	0	4.63177	0	0	0	0	0	0	0	0	0	0	0	0	0	0	0	0	0	0	0	0	0	0	0	0	0	0	0	0	0	0	0	0	8	2.54193	0.794581	-6.40436	21.1853	3.81661	2.86289	-1.44431	8.85004	1.82743
0	0	0	0	0	0	0	0	4.08674	0	0	0	0	0	0	0	0	0	0	0	0	0	0	0	0	0	0	0	0	0	0	0	0	0	0	0	0	0	0	0	9	-2.29647	-2.82025	-0.292736	3.57293	0.882796	-0.710592	-5.39812	1.82743	6.99262
0	0	0	0	0	0	0	0	0	0.8988	0	0	0	0	0	0	0	0	0	0	0	0	0	0	0	0	0	0	0	0	0	0	0	0	0	0	0	0	0	0	10	0.412449	0.0372225	0.562263	-0.0356639	-0.022341	0.794832	1.36754	0.0158719	0.487787
0	0	0	0	0	0	0	0	0	0	6.72717	0	0	0	0	0	0	0	0	0	0	0	0	0	0	0	0	0	0	0	0	0	0	0	0	0	0	0	0	0	11	4.51765	2.26323	0.975334	-1.99768	0.439318	7.16546	9.09921	-1.05055	-0.197483
0.125	0	0	0	0	0	0	0	0	0	0	0	0	0	0	0	0	0	0	0	0	0	0	0	0	0	0	0	0	0	0	0	0	0	0	0	0	0	0	0	12-dimensional	23.3604	22.9752	-12.027	-5.86641	2.18713	3.01452	-0.356696	11.1264	-6.67965
0	6.39543	0	0	0	0	0	0	0	0	0	0	0	0	0	0	0	0	0	0	0	0	0	0	0	0	0	0	0	0	0	0	0	0	0	0	0	0	0	0	2	22.9752	63.433	3.6632	-6.49697	36.7051	20.0235	19.4203	33.1946	-4.09204
0	0	4.99057	0	0	0	0	0	0	0	0	0	0	0	0	0	0	0	0	0	0	0	0	0	0	0	0	0	0	0	0	0	0	0	0	0	0	0	0	0	3	-12.027	3.6632	74.2387	-3.58684	10.7483	14.5608	-3.116	14.4015	3.20188
0	0	0	0.677932	0	0	0	0	0	0	0	0	0	0	0	0	0	0	0	0	0	0	0	0	0	0	0	0	0	0	0	0	0	0	0	0	0	0	0	0	4	-5.86641	-6.49697	-3.58684	18.4481	-0.805115	-12.4788	6.98119	-7.64635	2.46638
0	0	0	0	0.670572	0	0	0	0	0	0	0	0	0	0	0	0	0	0	0	0	0	0	0	0	0	0	0	0	0	0	0	0	0	0	0	0	0	0	0	5	2.18713	36.7051	10.7483	-0.805115	74.8676	18.7594	48.2426	37.3119	-2.7411
0	0	0	0	0	1.19606	0	0	0	0	0	0	0	0	0	0	0	0	0	0	0	0	0	0	0	0	0	0	0	0	0	0	0	0	0	0	0	0	0	0	6	3.01452	20.0235	14.5608	-12.4788	18.7594	35.1582	-0.67107	28.0881	-3.76862
0	0	0	0	0	0	6.33752	0	0	0	0	0	0	0	0	0	0	0	0	0	0	0	0	0	0	0	0	0	0	0	0	0	0	0	0	0	0	0	0	0	7	-0.356696	19.4203	-3.116	6.98119	48.2426	-0.67107	50.2197	9.83537	-3.23645
0	0	0	0	0	0	0	0.852638	0	0	0	0	0	0	0	0	0	0	0	0	0	0	0	0	0	0	0	0	0	0	0	0	0	0	0	0	0	0	0	0	8	11.1264	33.1946	14.4015	-7.64635	37.3119	28.0881	9.83537	51.9066	0.014107
0	0	0	0	0	0	0	0	1.99822	0	0	0	0	0	0	0	0	0	0	0	0	0	0	0	0	0	0	0	0	0	0	0	0	0	0	0	0	0	0	0	9	-6.67965	-4.09204	3.20188	2.46638	-2.7411	-3.76862	-3.23645	0.014107	8.82011
0	0	0	0	0	0	0	0	0	2.04373	0	0	0	0	0	0	0	0	0	0	0	0	0	0	0	0	0	0	0	0	0	0	0	0	0	0	0	0	0	0	10	2.25974	8.48608	3.41308	-4.65797	8.88135	5.98716	4.03332	11.5703	1.25917
0	0	0	0	0	0	0	0	0	0	0.950475	0	0	0	0	0	0	0	0	0	0	0	0	0	0	0	0	0	0	0	0	0	0	0	0	0	0	0	0	0	11	3.08197	11.212	10.6906	-8.2357	11.1925	12.0022	0.279714	19.4433	3.80859
0	0	0	0	0	0	0	0	0	0	0	8	0	0	0	0	0	0	0	0	0	0	0	0	0	0	0	0	0	0	0	0	0	0	0	0	0	0	0	0	12	2.11266	10.288	6.09909	-2.12484	11.8379	9.13964	2.17853	16.9555	1.3152
0.105112	0	0	0	0	0	0	0	0	0	0	0	0	0	0	0	0	0	0	0	0	0	0	0	0	0	0	0	0	0	0	0	0	0	0	0	0	0	0	0	13-dimensional	24.8752	27.3104	9.63089	-3.38733	-6.15574	-8.34457	-2.87355	12.6524	-3.75224
0	8.18096	0	0	0	0	0	0	0	0	0	0	0	0	0	0	0	0	0	0	0	0	0	0	0	0	0	0	0	0	0	0	0	0	0	0	0	0	0	0	2	27.3104	138.218	44.864	-22.8456	-27.3484	-7.6835	47.9926	12.8945	5.18676
0	0	6.67416	0	0	0	0	0	0	0	0	0	0	0	0	0	0	0	0	0	0	0	0	0	0	0	0	0	0	0	0	0	0	0	0	0	0	0	0	0	3	9.63089	44.864	114.434	-44.7074	-54.736	34.2238	-16.8504	-0.2155	1.85822
0	0	0	7.00856	0	0	0	0	0	0	0	0	0	0	0	0	0	0	0	0	0	0	0	0	0	0	0	0	0	0	0	0	0	0	0	0	0	0	0	0	4	-3.38733	-22.8456	-44.7074	90.8714	40.7685	21.9856	-8.70388	15.3721	-20.6789
0	0	0	0	6.22566	0	0	0	0	0	0	0	0	0	0	0	0	0	0	0	0	0	0	0	0	0	0	0	0	0	0	0	0	0	0	0	0	0	0	0	5	-6.15574	-27.3484	-54.736	40.7685	112.015	4.84157	-15.9098	-4.05893	18.6917
0	0	0	0	0	4.96247	0	0	0	0	0	0	0	0	0	0	0	0	0	0	0	0	0	0	0	0	0	0	0	0	0	0	0	0	0	0	0	0	0	0	6	-8.34457	-7.6835	34.2238	21.9856	4.84157	85.3384	-16.2451	5.67899	-10.7009
0	0	0	0	0	0	3.17595	0	0	0	0	0	0	0	0	0	0	0	0	0	0	0	0	0	0	0	0	0	0	0	0	0	0	0	0	0	0	0	0	0	7	-2.87355	47.9926	-16.8504	-8.70388	-15.9098	-16.2451	59.9146	15.8277	3.19839
0	0	0	0	0	0	0	6.33146	0	0	0	0	0	0	0	0	0	0	0	0	0	0	0	0	0	0	0	0	0	0	0	0	0	0	0	0	0	0	0	0	8	12.6524	12.8945	-0.2155	15.3721	-4.05893	5.67899	15.8277	42.8827	-14.4615
0	0	0	0	0	0	0	0	1.21123	0	0	0	0	0	0	0	0	0	0	0	0	0	0	0	0	0	0	0	0	0	0	0	0	0	0	0	0	0	0	0	9	-3.75224	5.18676	1.85822	-20.6789	18.6917	-10.7009	3.19839	-14.4615	35.6008
0	0	0	0	0	0	0	0	0	1.49586	0	0	0	0	0	0	0	0	0	0	0	0	0	0	0	0	0	0	0	0	0	0	0	0	0	0	0	0	0	0	10	-3.88534	10.0235	-5.12986	1.28422	-8.08533	-8.23177	14.6143	2.71224	-4.25071
0	0	0	0	0	0	0	0	0	0	0.291069	0	0	0	0	0	0	0	0	0	0	0	0	0	0	0	0	0	0	0	0	0	0	0	0	0	0	0	0	0	11	0.62675	1.10541	-1.2556	-26.7905	26.8345	-6.39384	-5.09107	-23.2023	33.1585
0	0	0	0	0	0	0	0	0	0	0	9.17769	0	0	0	0	0	0	0	0	0	0	0	0	0	0	0	0	0	0	0	0	0	0	0	0	0	0	0	0	12	-3.21299	10.3932	-3.50581	17.1255	-26.6517	-0.910365	18.9678	19.4324	-25.7463
0	0	0	0	0	0	0	0	0	0	0	0	9.51366	0	0	0	0	0	0	0	0	0	0	0	0	0	0	0	0	0	0	0	0	0	0	0	0	0	0	0	13	-0.219929	1.74001	-0.835115	-5.43885	4.1161	-1.92208	1.12246	-4.14556	6.32714
0.0883883	0	0	0	0	0	0	0	0	0	0	0	0	0	0	0	0	0	0	0	0	0	0	0	0	0	0	0	0	0	0	0	0	0	0	0	0	0	0	0	14-dimensional	71.7396	-8.94453	39.9122	-2.05984	20.4912	22.9362	24.4375	40.0486	5.69347
0	10.9811	0	0	0	0	0	0	0	0	0	0	0	0	0	0	0	0	0	0	0	0	0	0	0	0	0	0	0	0	0	0	0	0	0	0	0	0	0	0	2	-8.94453	313.115	-33.0549	0.881866	-75.5561	-23.2274	-47.617	13.7575	-24.8867
0	0	1.47876	0	0	0	0	0	0	0	0	0	0	0	0	0	0	0	0	0	0	0	0	0	0	0	0	0	0	0	0	0	0	0	0	0	0	0	0	0	3	39.9122	-33.0549	106.974	-2.09565	28.8541	0.546311	58.7982	22.7287	-7.63066
0	0	0	5.33522	0	0	0	0	0	0	0	0	0	0	0	0	0	0	0	0	0	0	0	0	0	0	0	0	0	0	0	0	0	0	0	0	0	0	0	0	4	-2.05984	0.881866	-2.09565	61.2385	38.9938	-5.96492	5.45435	22.9314	-2.48025
0	0	0	0	7.45999	0	0	0	0	0	0	0	0	0	0	0	0	0	0	0	0	0	0	0	0	0	0	0	0	0	0	0	0	0	0	0	0	0	0	0	5	20.4912	-75.5561	28.8541	38.9938	196.596	11.7436	22.4788	28.5924	10.0963
0	0	0	0	0	3.34581	0	0	0	0	0	0	0	0	0	0	0	0	0	0	0	0	0	0	0	0	0	0	0	0	0	0	0	0	0	0	0	0	0	0	6	22.9362	-23.2274	0.546311	-5.96492	11.7436	72.7347	11.1363	13.6655	12.7557
0	0	0	0	0	0	8.5583	0	0	0	0	0	0	0	0	0	0	0	0	0	0	0	0	0	0	0	0	0	0	0	0	0	0	0	0	0	0	0	0	0	7	24.4375	-47.617	58.7982	5.45435	22.4788	11.1363	108.589	-8.76728	13.3281
0	0	0	0	0	0	0	6.35344	0	0	0	0	0	0	0	0	0	0	0	0	0	0	0	0	0	0	0	0	0	0	0	0	0	0	0	0	0	0	0	0	8	40.0486	13.7575	22.7287	22.9314	28.5924	13.6655	-8.76728	115.852	-14.9377
0	0	0	0	0	0	0	0	4.8905	0	0	0	0	0	0	0	0	0	0	0	0	0	0	0	0	0	0	0	0	0	0	0	0	0	0	0	0	0	0	0	9	5.69347	-24.8867	-7.63066	-2.48025	10.0963	12.7557	13.3281	-14.9377	44.9189
0	0	0	0	0	0	0	0	0	3.08773	0	0	0	0	0	0	0	0	0	0	0	0	0	0	0	0	0	0	0	0	0	0	0	0	0	0	0	0	0	0	10	-40.1884	4.73682	-17.5038	6.98875	-14.8615	-42.2113	6.81602	-52.5095	5.40007
0	0	0	0	0	0	0	0	0	0	8.54932	0	0	0	0	0	0	0	0	0	0	0	0	0	0	0	0	0	0	0	0	0	0	0	0	0	0	0	0	0	11	10.2288	11.4308	22.8435	1.3063	-28.1292	-12.4978	14.0242	-28.5382	22.3822
0	0	0	0	0	0	0	0	0	0	0	10.173	0	0	0	0	0	0	0	0	0	0	0	0	0	0	0	0	0	0	0	0	0	0	0	0	0	0	0	0	12	5.15672	15.9492	2.49057	-0.648497	6.1241	13.8509	-6.25464	25.9571	-19.1253
0	0	0	0	0	0	0	0	0	0	0	0	8.26541	0	0	0	0	0	0	0	0	0	0	0	0	0	0	0	0	0	0	0	0	0	0	0	0	0	0	0	13	-2.33395	-24.3964	-5.82732	0.0251488	18.9547	24.8726	-4.32818	-9.24212	11.9468
0	0	0	0	0	0	0	0	0	0	0	0	0	11.3137	0	0	0	0	0	0	0	0	0	0	0	0	0	0	0	0	0	0	0	0	0	0	0	0	0	0	14	-0.027991	-14.3257	-3.14051	-0.0966894	12.205	14.276	-2.78956	-2.17175	5.64574
0.0743254	0	0	0	0	0	0	0	0	0	0	0	0	0	0	0	0	0	0	0	0	0	0	0	0	0	0	0	0	0	0	0	0	0	0	0	0	0	0	0	15-dimensional	71.2962	66.9477	86.4265	43.057	-14.6548	-44.6214	-12.1513	-6.72404	-23.5233
0	5.51772	0	0	0	0	0	0	0	0	0	0	0	0	0	0	0	0	0	0	0	0	0	0	0	0	0	0	0	0	0	0	0	0	0	0	0	0	0	0	2	66.9477	196.72	102.571	-2.73634	-24.8655	-9.79852	6.24041	10.2329	-39.8052
0	0	12.629	0	0	0	0	0	0	0	0	0	0	0	0	0	0	0	0	0	0	0	0	0	0	0	0	0	0	0	0	0	0	0	0	0	0	0	0	0	3	86.4265	102.571	268.828	-4.2269	-64.5617	-11.7753	-7.95981	-1.9027	15.9095
0	0	0	3.49195	0	0	0	0	0	0	0	0	0	0	0	0	0	0	0	0	0	0	0	0	0	0	0	0	0	0	0	0	0	0	0	0	0	0	0	0	4	43.057	-2.73634	-4.2269	129.205	52.3017	-22.5894	-22.106	-4.7533	-28.6341
0	0	0	0	7.20806	0	0	0	0	0	0	0	0	0	0	0	0	0	0	0	0	0	0	0	0	0	0	0	0	0	0	0	0	0	0	0	0	0	0	0	5	-14.6548	-24.8655	-64.5617	52.3017	165.734	0.0278519	-0.998786	-30.5809	22.8977
0	0	0	0	0	12.849	0	0	0	0	0	0	0	0	0	0	0	0	0	0	0	0	0	0	0	0	0	0	0	0	0	0	0	0	0	0	0	0	0	0	6	-44.6214	-9.79852	-11.7753	-22.5894	0.0278519	157.959	42.029	6.09732	41.7593
0	0	0	0	0	0	3.65679	0	0	0	0	0	0	0	0	0	0	0	0	0	0	0	0	0	0	0	0	0	0	0	0	0	0	0	0	0	0	0	0	0	7	-12.1513	6.24041	-7.95981	-22.106	-0.998786	42.029	61.1167	-1.37045	32.5735
0	0	0	0	0	0	0	3.42046	0	0	0	0	0	0	0	0	0	0	0	0	0	0	0	0	0	0	0	0	0	0	0	0	0	0	0	0	0	0	0	0	8	-6.72404	10.2329	-1.9027	-4.7533	-30.5809	6.09732	-1.37045	92.5094	-82.5421
0	0	0	0	0	0	0	0	12.4866	0	0	0	0	0	0	0	0	0	0	0	0	0	0	0	0	0	0	0	0	0	0	0	0	0	0	0	0	0	0	0	9	-23.5233	-39.8052	15.9095	-28.6341	22.8977	41.7593	32.5735	-82.5421	136.467
0	0	0	0	0	0	0	0	0	0.991958	0	0	0	0	0	0	0	0	0	0	0	0	0	0	0	0	0	0	0	0	0	0	0	0	0	0	0	0	0	0	10	13.1833	1.33664	27.6829	1.61386	-18.0872	12.0273	12.9546	6.54754	2.10329
0	0	0	0	0	0	0	0	0	0	4.08031	0	0	0	0	0	0	0	0	0	0	0	0	0	0	0	0	0	0	0	0	0	0	0	0	0	0	0	0	0	11	13.448	-0.838699	9.02467	25.5921	-16.8325	25.8172	-7.89484	6.7638	-7.64293
0	0	0	0	0	0	0	0	0	0	0	7.98972	0	0	0	0	0	0	0	0	0	0	0	0	0	0	0	0	0	0	0	0	0	0	0	0	0	0	0	0	12	12.5893	1.36507	12.7303	14.7762	-10.6961	12.626	-4.28845	7.49091	-8.09909
0	0	0	0	0	0	0	0	0	0	0	0	2.79447	0	0	0	0	0	0	0	0	0	0	0	0	0	0	0	0	0	0	0	0	0	0	0	0	0	0	0	13	3.39748	0.248615	13.4739	-2.21678	-6.29478	-7.65106	4.92209	-6.76644	9.21346
0	0	0	0	0	0	0	0	0	0	0	0	0	8.58245	0	0	0	0	0	0	0	0	0	0	0	0	0	0	0	0	0	0	0	0	0	0	0	0	0	0	14	12.5874	1.73362	13.2276	12.5543	3.51967	-22.4374	-10.0072	-11.1914	1.07354
0	0	0	0	0	0	0	0	0	0	0	0	0	0	13.4543	0	0	0	0	0	0	0	0	0	0	0	0	0	0	0	0	0	0	0	0	0	0	0	0	0	15	0.472003	-0.0724618	0.667738	0.271982	0.309239	-1.264	-0.210343	-0.54724	0.146547
0.0625	0	0	0	0	0	0	0	0	0	0	0	0	0	0	0	0	0	0	0	0	0	0	0	0	0	0	0	0	0	0	0	0	0	0	0	0	0	0	0	16-dimensional	146.618	31.8536	123.723	-12.3275	17.6994	55.9459	84.325	36.6704	8.19283
0	12.7865	0	0	0	0	0	0	0	0	0	0	0	0	0	0	0	0	0	0	0	0	0	0	0	0	0	0	0	0	0	0	0	0	0	0	0	0	0	0	2	31.8536	350.093	-10.0277	-7.85272	-26.7576	35.8588	60.7691	20.7583	62.086
0	0	8.05836	0	0	0	0	0	0	0	0	0	0	0	0	0	0	0	0	0	0	0	0	0	0	0	0	0	0	0	0	0	0	0	0	0	0	0	0	0	3	123.723	-10.0277	243.245	-39.814	-66.2236	24.3724	45.7617	29.2743	-2.79122
0	0	0	10.4348	0	0	0	0	0	0	0	0	0	0	0	0	0	0	0	0	0	0	0	0	0	0	0	0	0	0	0	0	0	0	0	0	0	0	0	0	4	-12.3275	-7.85272	-39.814	209.101	73.412	-25.4133	-4.96557	-16.5213	19.9523
0	0	0	0	12.748	0	0	0	0	0	0	0	0	0	0	0	0	0	0	0	0	0	0	0	0	0	0	0	0	0	0	0	0	0	0	0	0	0	0	0	5	17.6994	-26.7576	-66.2236	73.412	251.089	32.2295	-7.77185	-40.5495	-55.5269
0	0	0	0	0	3.78189	0	0	0	0	0	0	0	0	0	0	0	0	0	0	0	0	0	0	0	0	0	0	0	0	0	0	0	0	0	0	0	0	0	0	6	55.9459	35.8588	24.3724	-25.4133	32.2295	174.602	46.5921	4.16584	-7.49176
0	0	0	0	0	0	9.63837	0	0	0	0	0	0	0	0	0	0	0	0	0	0	0	0	0	0	0	0	0	0	0	0	0	0	0	0	0	0	0	0	0	7	84.325	60.7691	45.7617	-4.96557	-7.77185	46.5921	157.501	41.172	82.9883
0	0	0	0	0	0	0	1.85487	0	0	0	0	0	0	0	0	0	0	0	0	0	0	0	0	0	0	0	0	0	0	0	0	0	0	0	0	0	0	0	0	8	36.6704	20.7583	29.2743	-16.5213	-40.5495	4.16584	41.172	91.501	40.1848
0	0	0	0	0	0	0	0	8.28252	0	0	0	0	0	0	0	0	0	0	0	0	0	0	0	0	0	0	0	0	0	0	0	0	0	0	0	0	0	0	0	9	8.19283	62.086	-2.79122	19.9523	-55.5269	-7.49176	82.9883	40.1848	195.678
0	0	0	0	0	0	0	0	0	13.4156	0	0	0	0	0	0	0	0	0	0	0	0	0	0	0	0	0	0	0	0	0	0	0	0	0	0	0	0	0	0	10	-43.5615	76.2888	-44.4018	49.4568	17.9312	9.3711	-0.446405	-34.8803	41.9575
0	0	0	0	0	0	0	0	0	0	14.7376	0	0	0	0	0	0	0	0	0	0	0	0	0	0	0	0	0	0	0	0	0	0	0	0	0	0	0	0	0	11	-26.5271	-54.1866	19.2775	11.6393	-15.6274	-103.6	-31.6926	-9.15802	-37.9373
0	0	0	0	0	0	0	0	0	0	0	8.00301	0	0	0	0	0	0	0	0	0	0	0	0	0	0	0	0	0	0	0	0	0	0	0	0	0	0	0	0	12	9.51727	8.98787	4.41847	4.20153	31.0742	5.60532	19.5975	15.2815	-21.525
0	0	0	0	0	0	0	0	0	0	0	0	4.48693	0	0	0	0	0	0	0	0	0	0	0	0	0	0	0	0	0	0	0	0	0	0	0	0	0	0	0	13	21.8456	16.0596	2.13367	2.27411	7.43347	13.9643	12.9893	20.4205	5.49655
0	0	0	0	0	0	0	0	0	0	0	0	0	10.462	0	0	0	0	0	0	0	0	0	0	0	0	0	0	0	0	0	0	0	0	0	0	0	0	0	0	14	-12.5634	-29.4672	3.32208	9.5979	34.4471	-27.1982	-22.6316	-11.7761	-31.8897
0	0	0	0	0	0	0	0	0	0	0	0	0	0	14.6819	0	0	0	0	0	0	0	0	0	0	0	0	0	0	0	0	0	0	0	0	0	0	0	0	0	15	-12.5565	9.79409	12.2316	-4.62421	-28.1181	8.01549	-3.05989	14.4156	-10.7894
0	0	0	0	0	0	0	0	0	0	0	0	0	0	0	16	0	0	0	0	0	0	0	0	0	0	0	0	0	0	0	0	0	0	0	0	0	0	0	0	16	-31.0014	1.08256	-25.9136	31.0241	10.8926	-58.0117	-30.6762	-24.467	-1.15088
0.052556	0	0	0	0	0	0	0	0	0	0	0	0	0	0	0	0	0	0	0	0	0	0	0	0	0	0	0	0	0	0	0	0	0	0	0	0	0	0	0	17-dimensional	99.4079	19.8574	-45.4244	-10.5367	16.2594	38.7557	-12.202	63.4117	-17.7317
0	9.72664	0	0	0	0	0	0	0	0	0	0	0	0	0	0	0	0	0	0	0	0	0	0	0	0	0	0	0	0	0	0	0	0	0	0	0	0	0	0	2	19.8574	311.608	207.952	-46.1356	19.2942	41.5783	-30.5008	38.5797	6.36824
0	0	18.5376	0	0	0	0	0	0	0	0	0	0	0	0	0	0	0	0	0	0	0	0	0	0	0	0	0	0	0	0	0	0	0	0	0	0	0	0	0	3	-45.4244	207.952	425	34.6678	11.4714	50.3868	2.90363	127.949	25.1724
0	0	0	3.79588	0	0	0	0	0	0	0	0	0	0	0	0	0	0	0	0	0	0	0	0	0	0	0	0	0	0	0	0	0	0	0	0	0	0	0	0	4	-10.5367	-46.1356	34.6678	140.327	-17.7497	4.78541	37.6829	43.8768	-24.5658
0	0	0	0	2.16226	0	0	0	0	0	0	0	0	0	0	0	0	0	0	0	0	0	0	0	0	0	0	0	0	0	0	0	0	0	0	0	0	0	0	0	5	16.2594	19.2942	11.4714	-17.7497	63.6537	-19.7728	12.6808	66.565	17.691
0	0	0	0	0	5.69478	0	0	0	0	0	0	0	0	0	0	0	0	0	0	0	0	0	0	0	0	0	0	0	0	0	0	0	0	0	0	0	0	0	0	6	38.7557	41.5783	50.3868	4.78541	-19.7728	194.914	-43.1412	14.5226	-54.1324
0	0	0	0	0	0	7.5745	0	0	0	0	0	0	0	0	0	0	0	0	0	0	0	0	0	0	0	0	0	0	0	0	0	0	0	0	0	0	0	0	0	7	-12.202	-30.5008	2.90363	37.6829	12.6808	-43.1412	57.4627	40.195	17.8374
0	0	0	0	0	0	0	8.03629	0	0	0	0	0	0	0	0	0	0	0	0	0	0	0	0	0	0	0	0	0	0	0	0	0	0	0	0	0	0	0	0	8	63.4117	38.5797	127.949	43.8768	66.565	14.5226	40.195	323.687	72.2187
0	0	0	0	0	0	0	0	5.96273	0	0	0	0	0	0	0	0	0	0	0	0	0	0	0	0	0	0	0	0	0	0	0	0	0	0	0	0	0	0	0	9	-17.7317	6.36824	25.1724	-24.5658	17.691	-54.1324	17.8374	72.2187	127.72
0	0	0	0	0	0	0	0	0	13.2181	0	0	0	0	0	0	0	0	0	0	0	0	0	0	0	0	0	0	0	0	0	0	0	0	0	0	0	0	0	0	10	-11.503	9.29588	37.5363	-20.8568	-1.27071	54.3283	-14.6746	2.93028	-14.3549
0	0	0	0	0	0	0	0	0	0	1.7958	0	0	0	0	0	0	0	0	0	0	0	0	0	0	0	0	0	0	0	0	0	0	0	0	0	0	0	0	0	11	11.1568	-22.5043	-52.4471	-26.7378	7.22124	-11.134	10.4282	-13.101	14.0321
0	0	0	0	0	0	0	0	0	0	0	7.68209	0	0	0	0	0	0	0	0	0	0	0	0	0	0	0	0	0	0	0	0	0	0	0	0	0	0	0	0	12	-12.6357	22.0346	-25.1987	-42.2827	39.7486	-23.748	10.4473	26.4021	30.2112
0	0	0	0	0	0	0	0	0	0	0	0	5.65354	0	0	0	0	0	0	0	0	0	0	0	0	0	0	0	0	0	0	0	0	0	0	0	0	0	0	0	13	17.1355	-13.5102	-13.0203	-2.16128	-11.6093	26.2836	-7.71557	-34.2554	-29.7426
0	0	0	0	0	0	0	0	0	0	0	0	0	5.86826	0	0	0	0	0	0	0	0	0	0	0	0	0	0	0	0	0	0	0	0	0	0	0	0	0	0	14	-14.3209	-16.7694	-17.1507	6.69965	-17.6883	6.59576	10.369	-36.6018	-19.8013
0	0	0	0	0	0	0	0	0	0	0	0	0	0	2.05555	0	0	0	0	0	0	0	0	0	0	0	0	0	0	0	0	0	0	0	0	0	0	0	0	0	15	1.55664	-1.89618	9.49907	15.5493	-13.0831	15.9286	-0.187016	-13.4713	-19.1845
0	0	0	0	0	0	0	0	0	0	0	0	0	0	0	11.3203	0	0	0	0	0	0	0	0	0	0	0	0	0	0	0	0	0	0	0	0	0	0	0	0	16	5.52725	-39.7643	-61.3923	-27.0776	-8.10985	-3.76646	1.23592	-36.9305	-16.8343
0	0	0	0	0	0	0	0	0	0	0	0	0	0	0	0	19.0273	0	0	0	0	0	0	0	0	0	0	0	0	0	0	0	0	0	0	0	0	0	0	0	17	0.367565	-6.02076	-5.63433	0.123417	-3.6897	3.30153	-0.891327	-7.80008	-5.38065
0.0441942	0	0	0	0	0	0	0	0	0	0	0	0	0	0	0	0	0	0	0	0	0	0	0	0	0	0	0	0	0	0	0	0	0	0	0	0	0	0	0	18-dimensional	276.095	-22.4743	33.6999	11.4665	12.8358	6.81437	-57.1163	55.7681	61.7574
0	6.42909	0	0	0	0	0	0	0	0	0	0	0	0	0	0	0	0	0	0	0	0	0	0	0	0	0	0	0	0	0	0	0	0	0	0	0	0	0	0	2	-22.4743	297.788	31.2418	39.2676	-67.4141	59.9201	87.6172	49.9933	-81.2717
0	0	3.5496	0	0	0	0	0	0	0	0	0	0	0	0	0	0	0	0	0	0	0	0	0	0	0	0	0	0	0	0	0	0	0	0	0	0	0	0	0	3	33.6999	31.2418	215.677	-71.992	-50.8383	-18.3994	-12.3064	29.9398	-66.8658
0	0	0	0.059069	0	0	0	0	0	0	0	0	0	0	0	0	0	0	0	0	0	0	0	0	0	0	0	0	0	0	0	0	0	0	0	0	0	0	0	0	4	11.4665	39.2676	-71.992	216.918	-12.0394	98.9857	-6.60682	-59.4863	-37.4141
0	0	0	0	6.44869	0	0	0	0	0	0	0	0	0	0	0	0	0	0	0	0	0	0	0	0	0	0	0	0	0	0	0	0	0	0	0	0	0	0	0	5	12.8358	-67.4141	-50.8383	-12.0394	340.692	-231.408	-3.50938	-25.4147	121.233
0	0	0	0	0	12.4833	0	0	0	0	0	0	0	0	0	0	0	0	0	0	0	0	0	0	0	0	0	0	0	0	0	0	0	0	0	0	0	0	0	0	6	6.81437	59.9201	-18.3994	98.9857	-231.408	349.809	30.0029	-26.6934	-100.141
0	0	0	0	0	0	19.712	0	0	0	0	0	0	0	0	0	0	0	0	0	0	0	0	0	0	0	0	0	0	0	0	0	0	0	0	0	0	0	0	0	7	-57.1163	87.6172	-12.3064	-6.60682	-3.50938	30.0029	343.347	11.7835	90.5802
0	0	0	0	0	0	0	0.998413	0	0	0	0	0	0	0	0	0	0	0	0	0	0	0	0	0	0	0	0	0	0	0	0	0	0	0	0	0	0	0	0	8	55.7681	49.9933	29.9398	-59.4863	-25.4147	-26.6934	11.7835	115.096	-24.3682
0	0	0	0	0	0	0	0	20.4757	0	0	0	0	0	0	0	0	0	0	0	0	0	0	0	0	0	0	0	0	0	0	0	0	0	0	0	0	0	0	0	9	61.7574	-81.2717	-66.8658	-37.4141	121.233	-100.141	90.5802	-24.3682	283.364
0	0	0	0	0	0	0	0	0	3.00201	0	0	0	0	0	0	0	0	0	0	0	0	0	0	0	0	0	0	0	0	0	0	0	0	0	0	0	0	0	0	10	-3.37918	-39.1151	26.2721	-82.6613	-57.1951	-31.7976	-28.4648	11.9591	-20.6595
0	0	0	0	0	0	0	0	0	0	18.8725	0	0	0	0	0	0	0	0	0	0	0	0	0	0	0	0	0	0	0	0	0	0	0	0	0	0	0	0	0	11	-75.3954	9.23774	-12.659	6.8718	48.9949	17.1209	-39.1457	-46.0462	36.3591
0	0	0	0	0	0	0	0	0	0	0	18.1213	0	0	0	0	0	0	0	0	0	0	0	0	0	0	0	0	0	0	0	0	0	0	0	0	0	0	0	0	12	-30.3965	-100.092	65.3289	-108.665	-79.0636	-22.5599	-19.3382	-4.16233	-47.0471
0	0	0	0	0	0	0	0	0	0	0	0	20.7729	0	0	0	0	0	0	0	0	0	0	0	0	0	0	0	0	0	0	0	0	0	0	0	0	0	0	0	13	96.9948	-26.7056	57.2848	-181.546	-64.7223	-11.0559	5.33666	-3.35831	133.473
0	0	0	0	0	0	0	0	0	0	0	0	0	3.14495	0	0	0	0	0	0	0	0	0	0	0	0	0	0	0	0	0	0	0	0	0	0	0	0	0	0	14	-112.006	-33.7299	-10.0775	49.0802	51.805	-51.0991	-51.2384	-58.0047	-2.03977
0	0	0	0	0	0	0	0	0	0	0	0	0	0	11.4427	0	0	0	0	0	0	0	0	0	0	0	0	0	0	0	0	0	0	0	0	0	0	0	0	0	15	-71.4756	-1.72484	-29.8531	-23.3822	4.36258	-45.5848	-37.291	-8.5333	-4.9207
0	0	0	0	0	0	0	0	0	0	0	0	0	0	0	9.18946	0	0	0	0	0	0	0	0	0	0	0	0	0	0	0	0	0	0	0	0	0	0	0	0	16	3.71164	14.9154	7.17088	-14.7537	0.376519	-5.19422	7.52832	28.7887	-9.82729
0	0	0	0	0	0	0	0	0	0	0	0	0	0	0	0	3.96401	0	0	0	0	0	0	0	0	0	0	0	0	0	0	0	0	0	0	0	0	0	0	0	17	-43.5946	-1.30085	-13.2101	-0.21465	11.3033	-15.0967	-9.50851	-9.57278	-5.51807
0	0	0	0	0	0	0	0	0	0	0	0	0	0	0	0	0	22.6274	0	0	0	0	0	0	0	0	0	0	0	0	0	0	0	0	0	0	0	0	0	0	18	-23.1197	-3.51237	-7.50324	2.20855	5.91251	-9.75666	-9.26408	-9.85653	-0.855644
0.0371627	0	0	0	0	0	0	0	0	0	0	0	0	0	0	0	0	0	0	0	0	0	0	0	0	0	0	0	0	0	0	0	0	0	0	0	0	0	0	0	19-dimensional	194.008	-77.7676	70.005	24.6869	-108.437	54.5836	56.7356	59.179	-97.6316
0	15.4932	0	0	0	0	0	0	0	0	0	0	0	0	0	0	0	0	0	0	0	0	0	0	0	0	0	0	0	0	0	0	0	0	0	0	0	0	0	0	2	-77.7676	295.912	28.2815	16.233	72.5407	-140.806	29.5036	5.09956	-5.9931
0	0	16.3272	0	0	0	0	0	0	0	0	0	0	0	0	0	0	0	0	0	0	0	0	0	0	0	0	0	0	0	0	0	0	0	0	0	0	0	0	0	3	70.005	28.2815	661.947	-26.435	178.462	-71.8072	-80.6933	-56.3826	65.4241
0	0	0	5.79965	0	0	0	0	0	0	0	0	0	0	0	0	0	0	0	0	0	0	0	0	0	0	0	0	0	0	0	0	0	0	0	0	0	0	0	0	4	24.6869	16.233	-26.435	340.114	51.6029	141.396	20.0476	-70.9698	17.2514
0	0	0	0	14.0085	0	0	0	0	0	0	0	0	0	0	0	0	0	0	0	0	0	0	0	0	0	0	0	0	0	0	0	0	0	0	0	0	0	0	0	5	-108.437	72.5407	178.462	51.6029	472.556	-136.952	-66.2361	74.81	102.039
0	0	0	0	0	26.6181	0	0	0	0	0	0	0	0	0	0	0	0	0	0	0	0	0	0	0	0	0	0	0	0	0	0	0	0	0	0	0	0	0	0	6	54.5836	-140.806	-71.8072	141.396	-136.952	800.411	-13.2414	41.5832	3.00564
0	0	0	0	0	0	13.2019	0	0	0	0	0	0	0	0	0	0	0	0	0	0	0	0	0	0	0	0	0	0	0	0	0	0	0	0	0	0	0	0	0	7	56.7356	29.5036	-80.6933	20.0476	-66.2361	-13.2414	418.296	49.5885	-69.4496
0	0	0	0	0	0	0	18.7095	0	0	0	0	0	0	0	0	0	0	0	0	0	0	0	0	0	0	0	0	0	0	0	0	0	0	0	0	0	0	0	0	8	59.179	5.09956	-56.3826	-70.9698	74.81	41.5832	49.5885	457.269	-16.6337
0	0	0	0	0	0	0	0	11.0927	0	0	0	0	0	0	0	0	0	0	0	0	0	0	0	0	0	0	0	0	0	0	0	0	0	0	0	0	0	0	0	9	-97.6316	-5.9931	65.4241	17.2514	102.039	3.00564	-69.4496	-16.6337	290.507
0	0	0	0	0	0	0	0	0	0.971667	0	0	0	0	0	0	0	0	0	0	0	0	0	0	0	0	0	0	0	0	0	0	0	0	0	0	0	0	0	0	10	-0.246591	-58.2806	21.5694	13.4413	35.1331	-31.1713	27.6766	-9.95665	26.5476
0	0	0	0	0	0	0	0	0	0	7.90599	0	0	0	0	0	0	0	0	0	0	0	0	0	0	0	0	0	0	0	0	0	0	0	0	0	0	0	0	0	11	24.8865	81.5202	5.06169	-8.21347	-79.7061	95.6689	37.4205	-87.4957	-88.8328
0	0	0	0	0	0	0	0	0	0	0	21.5731	0	0	0	0	0	0	0	0	0	0	0	0	0	0	0	0	0	0	0	0	0	0	0	0	0	0	0	0	12	-70.9155	68.2205	125.858	-36.2425	61.7514	-106.875	-81.406	20.1614	15.6772
0	0	0	0	0	0	0	0	0	0	0	0	9.3482	0	0	0	0	0	0	0	0	0	0	0	0	0	0	0	0	0	0	0	0	0	0	0	0	0	0	0	13	-22.9936	26.9912	50.361	36.7541	19.5032	-48.999	-15.0634	4.48772	30.3842
0	0	0	0	0	0	0	0	0	0	0	0	0	2.27599	0	0	0	0	0	0	0	0	0	0	0	0	0	0	0	0	0	0	0	0	0	0	0	0	0	0	14	-57.2786	-10.089	128.51	-38.9025	51.0737	-31.5022	-47.2688	19.9877	45.6373
0	0	0	0	0	0	0	0	0	0	0	0	0	0	13.7714	0	0	0	0	0	0	0	0	0	0	0	0	0	0	0	0	0	0	0	0	0	0	0	0	0	15	7.18541	60.0894	-118.553	147.581	-9.50445	26.513	-8.96529	-12.2213	-8.04118
0	0	0	0	0	0	0	0	0	0	0	0	0	0	0	9.89453	0	0	0	0	0	0	0	0	0	0	0	0	0	0	0	0	0	0	0	0	0	0	0	0	16	-26.2597	15.1263	49.3266	34.3334	39.3907	-29.5733	-10.9606	-16.1978	17.8264
0	0	0	0	0	0	0	0	0	0	0	0	0	0	0	0	19.9081	0	0	0	0	0	0	0	0	0	0	0	0	0	0	0	0	0	0	0	0	0	0	0	17	31.6164	-17.6833	-29.846	-56.4518	-29.471	24.1872	40.1473	-8.35649	-35.1685
0	0	0	0	0	0	0	0	0	0	0	0	0	0	0	0	0	14.1377	0	0	0	0	0	0	0	0	0	0	0	0	0	0	0	0	0	0	0	0	0	0	18	0.738104	8.04617	42.9985	10.3194	44.1435	-17.5285	7.13889	-13.9799	2.72794
0	0	0	0	0	0	0	0	0	0	0	0	0	0	0	0	0	0	26.9087	0	0	0	0	0	0	0	0	0	0	0	0	0	0	0	0	0	0	0	0	0	19	-1.94031	6.64335	1.37216	14.9019	8.06676	1.41649	-5.58256	-1.83669	3.57514
0.03125	0	0	0	0	0	0	0	0	0	0	0	0	0	0	0	0	0	0	0	0	0	0	0	0	0	0	0	0	0	0	0	0	0	0	0	0	0	0	0	20-dimensional	397.244	-166.563	199.369	-31.6884	-148.095	-104.704	-122.931	-43.55	-150.941
0	25.7508	0	0	0	0	0	0	0	0	0	0	0	0	0	0	0	0	0	0	0	0	0	0	0	0	0	0	0	0	0	0	0	0	0	0	0	0	0	0	2	-166.563	982.031	-40.0211	186.143	125.406	-79.4023	258.289	34.1423	-3.74733
0	0	26.1469	0	0	0	0	0	0	0	0	0	0	0	0	0	0	0	0	0	0	0	0	0	0	0	0	0	0	0	0	0	0	0	0	0	0	0	0	0	3	199.369	-40.0211	508.089	-9.59738	-166.864	-91.2754	32.1803	9.32329	-140.484
0	0	0	6.08842	0	0	0	0	0	0	0	0	0	0	0	0	0	0	0	0	0	0	0	0	0	0	0	0	0	0	0	0	0	0	0	0	0	0	0	0	4	-31.6884	186.143	-9.59738	482.164	46.4391	66.1006	121.312	53.6893	90.0053
0	0	0	0	3.98558	0	0	0	0	0	0	0	0	0	0	0	0	0	0	0	0	0	0	0	0	0	0	0	0	0	0	0	0	0	0	0	0	0	0	0	5	-148.095	125.406	-166.864	46.4391	389.716	39.3885	-23.7832	-27.6529	162.686
0	0	0	0	0	26.2775	0	0	0	0	0	0	0	0	0	0	0	0	0	0	0	0	0	0	0	0	0	0	0	0	0	0	0	0	0	0	0	0	0	0	6	-104.704	-79.4023	-91.2754	66.1006	39.3885	661.955	135.182	72.7652	28.8763
0	0	0	0	0	0	20.424	0	0	0	0	0	0	0	0	0	0	0	0	0	0	0	0	0	0	0	0	0	0	0	0	0	0	0	0	0	0	0	0	0	7	-122.931	258.289	32.1803	121.312	-23.7832	135.182	576.679	44.3815	-4.0376
0	0	0	0	0	0	0	0.54658	0	0	0	0	0	0	0	0	0	0	0	0	0	0	0	0	0	0	0	0	0	0	0	0	0	0	0	0	0	0	0	0	8	-43.55	34.1423	9.32329	53.6893	-27.6529	72.7652	44.3815	236.204	-20.206
0	0	0	0	0	0	0	0	28.6738	0	0	0	0	0	0	0	0	0	0	0	0	0	0	0	0	0	0	0	0	0	0	0	0	0	0	0	0	0	0	0	9	-150.941	-3.74733	-140.484	90.0053	162.686	28.8763	-4.0376	-20.206	362.666
0	0	0	0	0	0	0	0	0	16.5071	0	0	0	0	0	0	0	0	0	0	0	0	0	0	0	0	0	0	0	0	0	0	0	0	0	0	0	0	0	0	10	73.6546	-28.9728	202.312	51.1735	-239.708	-108.935	-12.3442	-155.276	-167.832
0	0	0	0	0	0	0	0	0	0	17.4389	0	0	0	0	0	0	0	0	0	0	0	0	0	0	0	0	0	0	0	0	0	0	0	0	0	0	0	0	0	11	-100.355	80.6515	-44.3617	142.166	6.76412	111.371	5.06761	-21.0599	94.8147
0	0	0	0	0	0	0	0	0	0	0	19.4184	0	0	0	0	0	0	0	0	0	0	0	0	0	0	0	0	0	0	0	0	0	0	0	0	0	0	0	0	12	64.6465	74.3976	-18.0355	11.8956	-1.16005	-90.0933	21.6007	-10.7995	1.62833
0	0	0	0	0	0	0	0	0	0	0	0	24.3414	0	0	0	0	0	0	0	0	0	0	0	0	0	0	0	0	0	0	0	0	0	0	0	0	0	0	0	13	-111.442	93.2837	13.9833	142.344	66.7195	165.721	53.4707	136.457	1.94138
0	0	0	0	0	0	0	0	0	0	0	0	0	27.3756	0	0	0	0	0	0	0	0	0	0	0	0	0	0	0	0	0	0	0	0	0	0	0	0	0	0	14	34.4091	-90.9546	47.7936	-95.1382	-108.932	-63.2281	-17.3946	-64.8727	-20.015
0	0	0	0	0	0	0	0	0	0	0	0	0	0	12.2711	0	0	0	0	0	0	0	0	0	0	0	0	0	0	0	0	0	0	0	0	0	0	0	0	0	15	46.1604	25.9769	53.6758	-87.3252	-49.5816	-53.8837	-5.97142	-1.71775	-112.639
0	0	0	0	0	0	0	0	0	0	0	0	0	0	0	2.73738	0	0	0	0	0	0	0	0	0	0	0	0	0	0	0	0	0	0	0	0	0	0	0	0	16	-30.9642	18.0782	-11.0267	-56.6823	-28.1111	3.57827	-7.80604	62.9065	-5.50981
0	0	0	0	0	0	0	0	0	0	0	0	0	0	0	0	23.4923	0	0	0	0	0	0	0	0	0	0	0	0	0	0	0	0	0	0	0	0	0	0	0	17	2.40945	4.94495	35.0586	47.0511	-46.9334	2.25581	16.3754	17.6203	-6.27553
0	0	0	0	0	0	0	0	0	0	0	0	0	0	0	0	0	10.6445	0	0	0	0	0	0	0	0	0	0	0	0	0	0	0	0	0	0	0	0	0	0	18	-46.2392	28.6925	-82.7015	-112.196	145.303	3.08033	-54.9425	-53.0601	20.4563
0	0	0	0	0	0	0	0	0	0	0	0	0	0	0	0	0	0	26.877	0	0	0	0	0	0	0	0	0	0	0	0	0	0	0	0	0	0	0	0	0	19	-92.3249	3.66574	-72.5807	-100.403	100.585	37.6362	-52.2703	2.59567	46.9398
0	0	0	0	0	0	0	0	0	0	0	0	0	0	0	0	0	0	0	32	0	0	0	0	0	0	0	0	0	0	0	0	0	0	0	0	0	0	0	0	20	-0.983206	-10.1851	4.81135	8.96208	-13.678	5.1319	3.99847	8.72317	4.05619
0.026278	0	0	0	0	0	0	0	0	0	0	0	0	0	0	0	0	0	0	0	0	0	0	0	0	0	0	0	0	0	0	0	0	0	0	0	0	0	0	0	21-dimensional	387.31	247.88	244.806	-25.1832	-12.1192	102.576	14.3837	-0.0195541	109.816
0	14.1623	0	0	0	0	0	0	0	0	0	0	0	0	0	0	0	0	0	0	0	0	0	0	0	0	0	0	0	0	0	0	0	0	0	0	0	0	0	0	2	247.88	579.763	262.184	51.1825	45.7482	87.6734	-17.3313	-94.5108	152.418
0	0	31.5219	0	0	0	0	0	0	0	0	0	0	0	0	0	0	0	0	0	0	0	0	0	0	0	0	0	0	0	0	0	0	0	0	0	0	0	0	0	3	244.806	262.184	896.849	20.8718	60.8933	29.7389	116.099	-30.893	-188.435
0	0	0	6.73899	0	0	0	0	0	0	0	0	0	0	0	0	0	0	0	0	0	0	0	0	0	0	0	0	0	0	0	0	0	0	0	0	0	0	0	0	4	-25.1832	51.1825	20.8718	676.667	262.965	-299.089	-160.215	-170.691	146.499
0	0	0	0	4.9517	0	0	0	0	0	0	0	0	0	0	0	0	0	0	0	0	0	0	0	0	0	0	0	0	0	0	0	0	0	0	0	0	0	0	0	5	-12.1192	45.7482	60.8933	262.965	399.021	-139.608	158.461	-82.7018	113.781
0	0	0	0	0	33.4868	0	0	0	0	0	0	0	0	0	0	0	0	0	0	0	0	0	0	0	0	0	0	0	0	0	0	0	0	0	0	0	0	0	0	6	102.576	87.6734	29.7389	-299.089	-139.608	826.874	298.231	-61.0481	94.9091
0	0	0	0	0	0	1.70253	0	0	0	0	0	0	0	0	0	0	0	0	0	0	0	0	0	0	0	0	0	0	0	0	0	0	0	0	0	0	0	0	0	7	14.3837	-17.3313	116.099	-160.215	158.461	298.231	500.637	6.24469	-109.531
0	0	0	0	0	0	0	26.1411	0	0	0	0	0	0	0	0	0	0	0	0	0	0	0	0	0	0	0	0	0	0	0	0	0	0	0	0	0	0	0	0	8	-0.0195541	-94.5108	-30.893	-170.691	-82.7018	-61.0481	6.24469	566.506	-130.049
0	0	0	0	0	0	0	0	27.9305	0	0	0	0	0	0	0	0	0	0	0	0	0	0	0	0	0	0	0	0	0	0	0	0	0	0	0	0	0	0	0	9	109.816	152.418	-188.435	146.499	113.781	94.9091	-109.531	-130.049	677.441
0	0	0	0	0	0	0	0	0	16.6512	0	0	0	0	0	0	0	0	0	0	0	0	0	0	0	0	0	0	0	0	0	0	0	0	0	0	0	0	0	0	10	86.8341	-117.68	-68.613	-280.277	-93.568	82.2492	155.984	16.085	18.2945
0	0	0	0	0	0	0	0	0	0	14.4709	0	0	0	0	0	0	0	0	0	0	0	0	0	0	0	0	0	0	0	0	0	0	0	0	0	0	0	0	0	11	54.7496	-40.8597	73.7098	30.2535	44.234	27.7223	27.325	31.1373	31.5321
0	0	0	0	0	0	0	0	0	0	0	37.281	0	0	0	0	0	0	0	0	0	0	0	0	0	0	0	0	0	0	0	0	0	0	0	0	0	0	0	0	12	-121.257	-39.9126	60.414	-181.168	-49.7913	138.226	148.959	181.469	-131.154
0	0	0	0	0	0	0	0	0	0	0	0	15.1993	0	0	0	0	0	0	0	0	0	0	0	0	0	0	0	0	0	0	0	0	0	0	0	0	0	0	0	13	21.0193	-11.9307	50.4466	-54.8315	17.1797	-40.2862	-19.1532	60.6194	45.3938
0	0	0	0	0	0	0	0	0	0	0	0	0	16.7659	0	0	0	0	0	0	0	0	0	0	0	0	0	0	0	0	0	0	0	0	0	0	0	0	0	0	14	-8.02087	-61.2772	28.2417	84.9839	97.8668	-33.0223	78.55	-38.4002	-32.0988
0	0	0	0	0	0	0	0	0	0	0	0	0	0	5.98942	0	0	0	0	0	0	0	0	0	0	0	0	0	0	0	0	0	0	0	0	0	0	0	0	0	15	32.6777	9.9685	52.6954	-64.0146	-1.45558	10.9431	27.8416	32.4386	-31.1924
0	0	0	0	0	0	0	0	0	0	0	0	0	0	0	12.4248	0	0	0	0	0	0	0	0	0	0	0	0	0	0	0	0	0	0	0	0	0	0	0	0	16	-31.1664	-51.4831	-18.5529	26.7264	-2.60495	-21.8118	-0.0453625	-37.9237	6.99021
0	0	0	0	0	0	0	0	0	0	0	0	0	0	0	0	11.9695	0	0	0	0	0	0	0	0	0	0	0	0	0	0	0	0	0	0	0	0	0	0	0	17	44.2059	6.67294	75.2687	-61.7027	20.3323	-52.009	66.8029	29.3884	-27.8287
0	0	0	0	0	0	0	0	0	0	0	0	0	0	0	0	0	34.0427	0	0	0	0	0	0	0	0	0	0	0	0	0	0	0	0	0	0	0	0	0	0	18	5.34764	-48.844	5.48797	-82.6006	-59.1199	-52.7914	-37.0365	39.4003	-10.403
0	0	0	0	0	0	0	0	0	0	0	0	0	0	0	0	0	0	9.4202	0	0	0	0	0	0	0	0	0	0	0	0	0	0	0	0	0	0	0	0	0	19	63.798	31.894	76.3324	-19.0059	24.6095	31.6298	53.0373	9.41144	-20.2987
0	0	0	0	0	0	0	0	0	0	0	0	0	0	0	0	0	0	0	11.8409	0	0	0	0	0	0	0	0	0	0	0	0	0	0	0	0	0	0	0	0	20	-47.9814	-10.0683	-64.7291	25.3587	-6.4946	-18.4356	-24.489	-16.3414	28.0215
0	0	0	0	0	0	0	0	0	0	0	0	0	0	0	0	0	0	0	0	38.0546	0	0	0	0	0	0	0	0	0	0	0	0	0	0	0	0	0	0	0	21	43.4891	10.6162	53.1397	-26.1705	6.13993	23.587	24.3049	16.9364	-23.3496
0.0220971	0	0	0	0	0	0	0	0	0	0	0	0	0	0	0	0	0	0	0	0	0	0	0	0	0	0	0	0	0	0	0	0	0	0	0	0	0	0	0	22-dimensional	655.081	430.664	-150.969	123.762	243.015	-90.9768	82.2112	-56.485	46.0964
0	18.5164	0	0	0	0	0	0	0	0	0	0	0	0	0	0	0	0	0	0	0	0	0	0	0	0	0	0	0	0	0	0	0	0	0	0	0	0	0	0	2	430.664	1086.97	11.5286	187.66	175.275	89.7617	197.337	-19.2366	5.70216
0	0	32.0474	0	0	0	0	0	0	0	0	0	0	0	0	0	0	0	0	0	0	0	0	0	0	0	0	0	0	0	0	0	0	0	0	0	0	0	0	0	3	-150.969	11.5286	800.496	-63.9146	-315.762	3.42448	-2.88524	13.2751	92.5489
0	0	0	6.51922	0	0	0	0	0	0	0	0	0	0	0	0	0	0	0	0	0	0	0	0	0	0	0	0	0	0	0	0	0	0	0	0	0	0	0	0	4	123.762	187.66	-63.9146	388.473	270.199	6.75011	78.1176	-24.8479	36.3399
0	0	0	0	39.4344	0	0	0	0	0	0	0	0	0	0	0	0	0	0	0	0	0	0	0	0	0	0	0	0	0	0	0	0	0	0	0	0	0	0	0	5	243.015	175.275	-315.762	270.199	1453.12	-77.2206	-172.357	-80.3666	292.993
0	0	0	0	0	3.78347	0	0	0	0	0	0	0	0	0	0	0	0	0	0	0	0	0	0	0	0	0	0	0	0	0	0	0	0	0	0	0	0	0	0	6	-90.9768	89.7617	3.42448	6.75011	-77.2206	219.536	-84.2613	13.7073	-99.5472
0	0	0	0	0	0	20.9078	0	0	0	0	0	0	0	0	0	0	0	0	0	0	0	0	0	0	0	0	0	0	0	0	0	0	0	0	0	0	0	0	0	7	82.2112	197.337	-2.88524	78.1176	-172.357	-84.2613	927.909	43.4669	-17.5643
0	0	0	0	0	0	0	1.39668	0	0	0	0	0	0	0	0	0	0	0	0	0	0	0	0	0	0	0	0	0	0	0	0	0	0	0	0	0	0	0	0	8	-56.485	-19.2366	13.2751	-24.8479	-80.3666	13.7073	43.4669	85.4129	-61.1177
0	0	0	0	0	0	0	0	34.0914	0	0	0	0	0	0	0	0	0	0	0	0	0	0	0	0	0	0	0	0	0	0	0	0	0	0	0	0	0	0	0	9	46.0964	5.70216	92.5489	36.3399	292.993	-99.5472	-17.5643	-61.1177	663.533
0	0	0	0	0	0	0	0	0	31.6869	0	0	0	0	0	0	0	0	0	0	0	0	0	0	0	0	0	0	0	0	0	0	0	0	0	0	0	0	0	0	10	-88.1251	-67.5241	90.9368	-42.9205	-32.2	-55.8945	-137.069	-36.253	-32.5956
0	0	0	0	0	0	0	0	0	0	9.72507	0	0	0	0	0	0	0	0	0	0	0	0	0	0	0	0	0	0	0	0	0	0	0	0	0	0	0	0	0	11	113.267	205.984	-130.24	-44.0432	-108.836	26.8281	205.443	33.1358	-55.5748
0	0	0	0	0	0	0	0	0	0	0	30.776	0	0	0	0	0	0	0	0	0	0	0	0	0	0	0	0	0	0	0	0	0	0	0	0	0	0	0	0	12	0.698349	175.885	86.9385	57.368	86.7632	-4.4683	21.1181	-46.2692	-101.759
0	0	0	0	0	0	0	0	0	0	0	0	25.23	0	0	0	0	0	0	0	0	0	0	0	0	0	0	0	0	0	0	0	0	0	0	0	0	0	0	0	13	255.847	52.0748	-57.3685	-2.90285	183.516	-49.16	-112.264	-111.233	111.774
0	0	0	0	0	0	0	0	0	0	0	0	0	38.5006	0	0	0	0	0	0	0	0	0	0	0	0	0	0	0	0	0	0	0	0	0	0	0	0	0	0	14	-157.688	-28.7813	125.452	-38.7675	178.616	38.4446	-43.6226	-50.5931	30.1423
0	0	0	0	0	0	0	0	0	0	0	0	0	0	25.2875	0	0	0	0	0	0	0	0	0	0	0	0	0	0	0	0	0	0	0	0	0	0	0	0	0	15	-221.61	-99.2067	80.8847	96.0339	-193.706	159.464	-152.072	-31.4527	-135.727
0	0	0	0	0	0	0	0	0	0	0	0	0	0	0	40.8118	0	0	0	0	0	0	0	0	0	0	0	0	0	0	0	0	0	0	0	0	0	0	0	0	16	-152.378	352.877	117.063	5.5063	-118.388	132.362	-54.5441	-4.8797	70.4962
0	0	0	0	0	0	0	0	0	0	0	0	0	0	0	0	18.998	0	0	0	0	0	0	0	0	0	0	0	0	0	0	0	0	0	0	0	0	0	0	0	17	97.6056	11.266	-40.8331	-39.4233	-34.8277	-41.5422	-50.9599	33.3613	-41.9966
0	0	0	0	0	0	0	0	0	0	0	0	0	0	0	0	0	16.2212	0	0	0	0	0	0	0	0	0	0	0	0	0	0	0	0	0	0	0	0	0	0	18	20.798	-17.5389	2.61368	72.5436	-54.9201	14.6818	168.561	0.334112	-61.2288
0	0	0	0	0	0	0	0	0	0	0	0	0	0	0	0	0	0	22.1403	0	0	0	0	0	0	0	0	0	0	0	0	0	0	0	0	0	0	0	0	0	19	18.4162	-104.596	-43.134	41.2585	-95.1097	-83.9781	124.06	-36.6392	-3.56957
0	0	0	0	0	0	0	0	0	0	0	0	0	0	0	0	0	0	0	11.6	0	0	0	0	0	0	0	0	0	0	0	0	0	0	0	0	0	0	0	0	20	-56.2966	25.3634	52.4615	28.8148	72.4574	34.0534	-17.5817	-25.9502	50.4146
0	0	0	0	0	0	0	0	0	0	0	0	0	0	0	0	0	0	0	0	42.051	0	0	0	0	0	0	0	0	0	0	0	0	0	0	0	0	0	0	0	21	116.77	-220.223	-173.366	1.1549	-247.925	-54.2124	147.313	55.6548	-225.847
0	0	0	0	0	0	0	0	0	0	0	0	0	0	0	0	0	0	0	0	0	45.2548	0	0	0	0	0	0	0	0	0	0	0	0	0	0	0	0	0	0	22	45.9826	-42.6597	-50.3248	-10.809	-72.2139	-13.3241	48.6472	26.4731	-66.9391
0.0185814	0	0	0	0	0	0	0	0	0	0	0	0	0	0	0	0	0	0	0	0	0	0	0	0	0	0	0	0	0	0	0	0	0	0	0	0	0	0	0	23-dimensional	649.466	-222.053	-75.679	15.0921	-23.017	-58.6559	99.0699	-141.781	111.594
0	25.1295	0	0	0	0	0	0	0	0	0	0	0	0	0	0	0	0	0	0	0	0	0	0	0	0	0	0	0	0	0	0	0	0	0	0	0	0	0	0	2	-222.053	906.922	-185.683	-259.404	59.9915	187.747	73.645	-128.423	-68.6635
0	0	13.6839	0	0	0	0	0	0	0	0	0	0	0	0	0	0	0	0	0	0	0	0	0	0	0	0	0	0	0	0	0	0	0	0	0	0	0	0	0	3	-75.679	-185.683	808.498	-63.6741	74.5836	21.1528	-6.17974	-15.2212	-65.4019
0	0	0	23.2176	0	0	0	0	0	0	0	0	0	0	0	0	0	0	0	0	0	0	0	0	0	0	0	0	0	0	0	0	0	0	0	0	0	0	0	0	4	15.0921	-259.404	-63.6741	1214.39	-73.3729	-211.314	-181.353	-242.805	73.933
0	0	0	0	37.8138	0	0	0	0	0	0	0	0	0	0	0	0	0	0	0	0	0	0	0	0	0	0	0	0	0	0	0	0	0	0	0	0	0	0	0	5	-23.017	59.9915	74.5836	-73.3729	1031.08	-106.554	-67.7823	-372.239	12.0834
0	0	0	0	0	21.6634	0	0	0	0	0	0	0	0	0	0	0	0	0	0	0	0	0	0	0	0	0	0	0	0	0	0	0	0	0	0	0	0	0	0	6	-58.6559	187.747	21.1528	-211.314	-106.554	565.622	-12.2518	2.65896	44.3609
0	0	0	0	0	0	9.80136	0	0	0	0	0	0	0	0	0	0	0	0	0	0	0	0	0	0	0	0	0	0	0	0	0	0	0	0	0	0	0	0	0	7	99.0699	73.645	-6.17974	-181.353	-67.7823	-12.2518	366.681	54.9016	-143.92
0	0	0	0	0	0	0	46.0839	0	0	0	0	0	0	0	0	0	0	0	0	0	0	0	0	0	0	0	0	0	0	0	0	0	0	0	0	0	0	0	0	8	-141.781	-128.423	-15.2212	-242.805	-372.239	2.65896	54.9016	838.071	164.417
0	0	0	0	0	0	0	0	31.4479	0	0	0	0	0	0	0	0	0	0	0	0	0	0	0	0	0	0	0	0	0	0	0	0	0	0	0	0	0	0	0	9	111.594	-68.6635	-65.4019	73.933	12.0834	44.3609	-143.92	164.417	932.468
0	0	0	0	0	0	0	0	0	20.1167	0	0	0	0	0	0	0	0	0	0	0	0	0	0	0	0	0	0	0	0	0	0	0	0	0	0	0	0	0	0	10	-159.702	-120.189	74.5789	238.043	-36.1428	-53.8099	-132.643	-179.709	-223.353
0	0	0	0	0	0	0	0	0	0	11.9455	0	0	0	0	0	0	0	0	0	0	0	0	0	0	0	0	0	0	0	0	0	0	0	0	0	0	0	0	0	11	-40.9863	133.337	26.2985	-132.778	21.144	79.3734	-12.2495	17.9403	100.974
0	0	0	0	0	0	0	0	0	0	0	11.8002	0	0	0	0	0	0	0	0	0	0	0	0	0	0	0	0	0	0	0	0	0	0	0	0	0	0	0	0	12	-33.4159	-118.347	83.9906	171.524	-84.3199	-209.991	-103.424	-54.7916	-229.169
0	0	0	0	0	0	0	0	0	0	0	0	28.1141	0	0	0	0	0	0	0	0	0	0	0	0	0	0	0	0	0	0	0	0	0	0	0	0	0	0	0	13	-64.6042	-60.1492	-118.17	224.456	-33.8259	-88.6632	-103.752	-205.843	37.7557
0	0	0	0	0	0	0	0	0	0	0	0	0	23.3362	0	0	0	0	0	0	0	0	0	0	0	0	0	0	0	0	0	0	0	0	0	0	0	0	0	0	14	-169.654	-170.375	-101.588	153.783	-129.778	-38.5629	-69.9697	60.4613	-45.0164
0	0	0	0	0	0	0	0	0	0	0	0	0	0	39.8998	0	0	0	0	0	0	0	0	0	0	0	0	0	0	0	0	0	0	0	0	0	0	0	0	0	15	-79.2074	-34.219	-50.9082	81.3059	58.817	31.3067	-71.0917	-49.2945	146.419
0	0	0	0	0	0	0	0	0	0	0	0	0	0	0	3.80869	0	0	0	0	0	0	0	0	0	0	0	0	0	0	0	0	0	0	0	0	0	0	0	0	16	-14.184	48.682	-50.3941	10.4572	26.9505	36.2404	-23.9363	7.54712	61.3315
0	0	0	0	0	0	0	0	0	0	0	0	0	0	0	0	45.6041	0	0	0	0	0	0	0	0	0	0	0	0	0	0	0	0	0	0	0	0	0	0	0	17	4.74816	-62.343	-64.0804	199.933	-48.3314	-25.6696	-168.664	-45.0133	152.072
0	0	0	0	0	0	0	0	0	0	0	0	0	0	0	0	0	36.5953	0	0	0	0	0	0	0	0	0	0	0	0	0	0	0	0	0	0	0	0	0	0	18	-59.6619	-60.2236	-68.1027	62.0091	-119.343	40.7351	-37.0248	47.9065	98.4949
0	0	0	0	0	0	0	0	0	0	0	0	0	0	0	0	0	0	7.37027	0	0	0	0	0	0	0	0	0	0	0	0	0	0	0	0	0	0	0	0	0	19	54.5326	81.6853	-104.422	-0.074218	-29.4629	64.4678	43.6775	56.6505	63.5556
0	0	0	0	0	0	0	0	0	0	0	0	0	0	0	0	0	0	0	46.1996	0	0	0	0	0	0	0	0	0	0	0	0	0	0	0	0	0	0	0	0	20	77.9086	50.5727	-85.9345	15.476	-74.7303	-10.5782	66.8469	51.6646	-16.4205
0	0	0	0	0	0	0	0	0	0	0	0	0	0	0	0	0	0	0	0	10.7694	0	0	0	0	0	0	0	0	0	0	0	0	0	0	0	0	0	0	0	21	-88.5739	-90.393	136.336	74.4202	-7.57228	-93.01	-44.3589	-105.763	-240.589
0	0	0	0	0	0	0	0	0	0	0	0	0	0	0	0	0	0	0	0	0	32.6927	0	0	0	0	0	0	0	0	0	0	0	0	0	0	0	0	0	0	22	10.4683	-20.6869	20.4626	3.7122	6.67826	-17.2137	-4.28787	-31.7354	-23.1151
0	0	0	0	0	0	0	0	0	0	0	0	0	0	0	0	0	0	0	0	0	0	53.8174	0	0	0	0	0	0	0	0	0	0	0	0	0	0	0	0	0	23	93.6114	40.316	-88.0877	-50.4713	11.8563	41.8397	26.6145	24.7626	154.998
0.015625	0	0	0	0	0	0	0	0	0	0	0	0	0	0	0	0	0	0	0	0	0	0	0	0	0	0	0	0	0	0	0	0	0	0	0	0	0	0	0	24-dimensional	624.143	-87.8117	-76.3954	133.997	117.605	-15.9845	320.986	77.5644	46.4215
0	34.762	0	0	0	0	0	0	0	0	0	0	0	0	0	0	0	0	0	0	0	0	0	0	0	0	0	0	0	0	0	0	0	0	0	0	0	0	0	0	2	-87.8117	1432.79	-147.776	233.988	143.586	-85.0884	-196.323	21.6153	-281.263
0	0	10.4019	0	0	0	0	0	0	0	0	0	0	0	0	0	0	0	0	0	0	0	0	0	0	0	0	0	0	0	0	0	0	0	0	0	0	0	0	0	3	-76.3954	-147.776	600.292	-107.164	-160.204	180.554	57.3554	-12.7666	-16.3036
0	0	0	0.377333	0	0	0	0	0	0	0	0	0	0	0	0	0	0	0	0	0	0	0	0	0	0	0	0	0	0	0	0	0	0	0	0	0	0	0	0	4	133.997	233.988	-107.164	652.24	-103.268	-367.364	-483.463	-63.1278	-178.203
0	0	0	0	49.3786	0	0	0	0	0	0	0	0	0	0	0	0	0	0	0	0	0	0	0	0	0	0	0	0	0	0	0	0	0	0	0	0	0	0	0	5	117.605	143.586	-160.204	-103.268	1505.84	273.181	-44.8079	182.036	233.359
0	0	0	0	0	48.9501	0	0	0	0	0	0	0	0	0	0	0	0	0	0	0	0	0	0	0	0	0	0	0	0	0	0	0	0	0	0	0	0	0	0	6	-15.9845	-85.0884	180.554	-367.364	273.181	1420.27	18.1179	-121.269	62.6671
0	0	0	0	0	0	26.9575	0	0	0	0	0	0	0	0	0	0	0	0	0	0	0	0	0	0	0	0	0	0	0	0	0	0	0	0	0	0	0	0	0	7	320.986	-196.323	57.3554	-483.463	-44.8079	18.1179	1543.82	-102.756	72.3559
0	0	0	0	0	0	0	3.65078	0	0	0	0	0	0	0	0	0	0	0	0	0	0	0	0	0	0	0	0	0	0	0	0	0	0	0	0	0	0	0	0	8	77.5644	21.6153	-12.7666	-63.1278	182.036	-121.269	-102.756	500.082	-123.175
0	0	0	0	0	0	0	0	37.4943	0	0	0	0	0	0	0	0	0	0	0	0	0	0	0	0	0	0	0	0	0	0	0	0	0	0	0	0	0	0	0	9	46.4215	-281.263	-16.3036	-178.203	233.359	62.6671	72.3559	-123.175	1155.02
0	0	0	0	0	0	0	0	0	11.1588	0	0	0	0	0	0	0	0	0	0	0	0	0	0	0	0	0	0	0	0	0	0	0	0	0	0	0	0	0	0	10	172.333	-39.6494	-8.07404	97.2064	75.9781	34.7881	218.948	-115.62	186.878
0	0	0	0	0	0	0	0	0	0	46.6353	0	0	0	0	0	0	0	0	0	0	0	0	0	0	0	0	0	0	0	0	0	0	0	0	0	0	0	0	0	11	313.349	-12.2135	14.0991	-28.6588	131.694	-60.5582	435.459	-57.0795	263.156
0	0	0	0	0	0	0	0	0	0	0	34.2019	0	0	0	0	0	0	0	0	0	0	0	0	0	0	0	0	0	0	0	0	0	0	0	0	0	0	0	0	12	97.4687	-145.985	40.2524	-45.0814	137.051	-138.401	169.285	274.07	-92.5403
0	0	0	0	0	0	0	0	0	0	0	0	16.2078	0	0	0	0	0	0	0	0	0	0	0	0	0	0	0	0	0	0	0	0	0	0	0	0	0	0	0	13	-98.7044	134.459	-5.85374	161.094	101.151	115.163	-224.213	-170.826	13.9734
0	0	0	0	0	0	0	0	0	0	0	0	0	58.6929	0	0	0	0	0	0	0	0	0	0	0	0	0	0	0	0	0	0	0	0	0	0	0	0	0	0	14	258.556	68.3756	-225.149	196.014	18.4371	-178.625	13.7242	88.0554	-54.3509
0	0	0	0	0	0	0	0	0	0	0	0	0	0	48.5282	0	0	0	0	0	0	0	0	0	0	0	0	0	0	0	0	0	0	0	0	0	0	0	0	0	15	-11.8979	-72.0088	-134.681	148.774	132.95	71.9337	54.5169	-267.108	-26.7967
0	0	0	0	0	0	0	0	0	0	0	0	0	0	0	56.7717	0	0	0	0	0	0	0	0	0	0	0	0	0	0	0	0	0	0	0	0	0	0	0	0	16	-147.221	-54.7311	113.724	-88.9751	-289.734	-174.164	-13.5947	16.5623	-141.609
0	0	0	0	0	0	0	0	0	0	0	0	0	0	0	0	4.41763	0	0	0	0	0	0	0	0	0	0	0	0	0	0	0	0	0	0	0	0	0	0	0	17	-19.9607	81.1145	-1.03131	19.5083	74.9014	89.996	-51.1623	-11.6542	48.7099
0	0	0	0	0	0	0	0	0	0	0	0	0	0	0	0	0	11.7586	0	0	0	0	0	0	0	0	0	0	0	0	0	0	0	0	0	0	0	0	0	0	18	-70.8213	-185.784	53.012	-335.321	34.974	233.595	551.995	-163.882	309.404
0	0	0	0	0	0	0	0	0	0	0	0	0	0	0	0	0	0	47.1768	0	0	0	0	0	0	0	0	0	0	0	0	0	0	0	0	0	0	0	0	0	19	-127.933	309.124	68.974	56.3053	32.6227	145.176	-220.533	-51.3917	-247.9
0	0	0	0	0	0	0	0	0	0	0	0	0	0	0	0	0	0	0	44.5945	0	0	0	0	0	0	0	0	0	0	0	0	0	0	0	0	0	0	0	0	20	151.266	98.1673	111.921	333.056	-221.09	-165.537	-133.645	-143.524	-220.585
0	0	0	0	0	0	0	0	0	0	0	0	0	0	0	0	0	0	0	0	49.731	0	0	0	0	0	0	0	0	0	0	0	0	0	0	0	0	0	0	0	21	63.2152	68.0571	70.9768	227.58	-159.774	-63.8825	-103.606	-58.7436	0.347641
0	0	0	0	0	0	0	0	0	0	0	0	0	0	0	0	0	0	0	0	0	32.1296	0	0	0	0	0	0	0	0	0	0	0	0	0	0	0	0	0	0	22	-40.3401	89.9431	-11.5704	73.5251	-89.6179	-77.1035	-169.891	47.7013	-123.636
0	0	0	0	0	0	0	0	0	0	0	0	0	0	0	0	0	0	0	0	0	0	27.2408	0	0	0	0	0	0	0	0	0	0	0	0	0	0	0	0	0	23	52.5746	-39.8437	-52.2756	-96.9478	9.86089	6.28664	118.523	-41.0857	83.1461
0	0	0	0	0	0	0	0	0	0	0	0	0	0	0	0	0	0	0	0	0	0	0	64	0	0	0	0	0	0	0	0	0	0	0	0	0	0	0	0	24	-1.97306	9.63864	1.08244	9.75917	-5.35105	-3.2839	-15.9658	1.72971	-7.83232
0.013139	0	0	0	0	0	0	0	0	0	0	0	0	0	0	0	0	0	0	0	0	0	0	0	0	0	0	0	0	0	0	0	0	0	0	0	0	0	0	0	25-dimensional	698.713	139.065	-46.1549	452.066	114.496	-166.086	-57.0988	141.488	315.014
0	46.5259	0	0	0	0	0	0	0	0	0	0	0	0	0	0	0	0	0	0	0	0	0	0	0	0	0	0	0	0	0	0	0	0	0	0	0	0	0	0	2	139.065	1961.3	30.6633	177.834	122.025	-322.881	98.8901	89.6065	248.612
0	0	65.1341	0	0	0	0	0	0	0	0	0	0	0	0	0	0	0	0	0	0	0	0	0	0	0	0	0	0	0	0	0	0	0	0	0	0	0	0	0	3	-46.1549	30.6633	2199.91	-164.738	-166.763	182.107	4.4599	-71.7793	-40.0961
0	0	0	51.0582	0	0	0	0	0	0	0	0	0	0	0	0	0	0	0	0	0	0	0	0	0	0	0	0	0	0	0	0	0	0	0	0	0	0	0	0	4	452.066	177.834	-164.738	2124.82	-78.6592	-329.413	434.227	69.195	187.18
0	0	0	0	39.8565	0	0	0	0	0	0	0	0	0	0	0	0	0	0	0	0	0	0	0	0	0	0	0	0	0	0	0	0	0	0	0	0	0	0	0	5	114.496	122.025	-166.763	-78.6592	1098.91	321.406	-90.7041	37.9051	116.959
0	0	0	0	0	22.7518	0	0	0	0	0	0	0	0	0	0	0	0	0	0	0	0	0	0	0	0	0	0	0	0	0	0	0	0	0	0	0	0	0	0	6	-166.086	-322.881	182.107	-329.413	321.406	1719.88	79.6901	81.5131	85.5365
0	0	0	0	0	0	53.5825	0	0	0	0	0	0	0	0	0	0	0	0	0	0	0	0	0	0	0	0	0	0	0	0	0	0	0	0	0	0	0	0	0	7	-57.0988	98.8901	4.4599	434.227	-90.7041	79.6901	1646.99	91.1555	-41.2677
0	0	0	0	0	0	0	29.0522	0	0	0	0	0	0	0	0	0	0	0	0	0	0	0	0	0	0	0	0	0	0	0	0	0	0	0	0	0	0	0	0	8	141.488	89.6065	-71.7793	69.195	37.9051	81.5131	91.1555	1142.13	172.785
0	0	0	0	0	0	0	0	43.2118	0	0	0	0	0	0	0	0	0	0	0	0	0	0	0	0	0	0	0	0	0	0	0	0	0	0	0	0	0	0	0	9	315.014	248.612	-40.0961	187.18	116.959	85.5365	-41.2677	172.785	1404.07
0	0	0	0	0	0	0	0	0	67.5759	0	0	0	0	0	0	0	0	0	0	0	0	0	0	0	0	0	0	0	0	0	0	0	0	0	0	0	0	0	0	10	-458.728	-52.115	-64.6848	-388.022	-110.411	-417.359	-133.994	-126.514	-652.751
0	0	0	0	0	0	0	0	0	0	64.1583	0	0	0	0	0	0	0	0	0	0	0	0	0	0	0	0	0	0	0	0	0	0	0	0	0	0	0	0	0	11	487.099	-297.044	94.0935	525.543	-310.322	45.646	-170.394	-169.521	294.095
0	0	0	0	0	0	0	0	0	0	0	68.4082	0	0	0	0	0	0	0	0	0	0	0	0	0	0	0	0	0	0	0	0	0	0	0	0	0	0	0	0	12	54.3625	-351.902	428.052	397.817	-202.463	64.4627	-64.1495	-4.76563	261.486
0	0	0	0	0	0	0	0	0	0	0	0	71.4676	0	0	0	0	0	0	0	0	0	0	0	0	0	0	0	0	0	0	0	0	0	0	0	0	0	0	0	13	-95.9063	122.346	-127.356	-297.528	276.518	613.719	-182.044	20.8729	-115.007
0	0	0	0	0	0	0	0	0	0	0	0	0	62.0646	0	0	0	0	0	0	0	0	0	0	0	0	0	0	0	0	0	0	0	0	0	0	0	0	0	0	14	-102.036	-173.759	203.613	-176.274	170.203	240.635	156.785	-103.194	-37.7859
0	0	0	0	0	0	0	0	0	0	0	0	0	0	0.116465	0	0	0	0	0	0	0	0	0	0	0	0	0	0	0	0	0	0	0	0	0	0	0	0	0	15	76.2307	21.1773	-31.8574	203.905	-35.4257	-163.312	28.2958	-3.4312	-50.2327
0	0	0	0	0	0	0	0	0	0	0	0	0	0	0	0.248329	0	0	0	0	0	0	0	0	0	0	0	0	0	0	0	0	0	0	0	0	0	0	0	0	16	-21.4368	9.60655	179.752	-11.8299	-39.3931	133.041	-55.4673	151.31	81.5067
0	0	0	0	0	0	0	0	0	0	0	0	0	0	0	0	6.66918	0	0	0	0	0	0	0	0	0	0	0	0	0	0	0	0	0	0	0	0	0	0	0	17	48.2135	175.795	-95.0713	160.839	-117.702	-208.765	102.312	69.5198	-3.04604
0	0	0	0	0	0	0	0	0	0	0	0	0	0	0	0	0	19.8535	0	0	0	0	0	0	0	0	0	0	0	0	0	0	0	0	0	0	0	0	0	0	18	-227.019	-186.629	39.9859	-6.28695	55.3145	187.736	87.5939	-68.1413	70.8463
0	0	0	0	0	0	0	0	0	0	0	0	0	0	0	0	0	0	1.74803	0	0	0	0	0	0	0	0	0	0	0	0	0	0	0	0	0	0	0	0	0	19	44.411	229.629	-45.3589	222.007	-31.9551	-195.691	147.988	33.3657	-80.1623
0	0	0	0	0	0	0	0	0	0	0	0	0	0	0	0	0	0	0	32.2843	0	0	0	0	0	0	0	0	0	0	0	0	0	0	0	0	0	0	0	0	20	-60.6284	5.46139	120.55	66.8569	21.3628	79.9869	65.5525	42.7625	0.77351
0	0	0	0	0	0	0	0	0	0	0	0	0	0	0	0	0	0	0	0	25.9669	0	0	0	0	0	0	0	0	0	0	0	0	0	0	0	0	0	0	0	21	114.783	-246.006	70.8351	285.403	-7.10534	51.8101	-9.57454	186.126	358.23
0	0	0	0	0	0	0	0	0	0	0	0	0	0	0	0	0	0	0	0	0	41.2081	0	0	0	0	0	0	0	0	0	0	0	0	0	0	0	0	0	0	22	-198.055	-85.346	17.9022	-208.827	87.9446	166.233	-10.3496	-174.699	-224.665
0	0	0	0	0	0	0	0	0	0	0	0	0	0	0	0	0	0	0	0	0	0	70.491	0	0	0	0	0	0	0	0	0	0	0	0	0	0	0	0	0	23	150.14	58.9958	-77.3221	306.652	-66.9626	-192.194	70.7099	131.129	173.752
0	0	0	0	0	0	0	0	0	0	0	0	0	0	0	0	0	0	0	0	0	0	0	22.7278	0	0	0	0	0	0	0	0	0	0	0	0	0	0	0	0	24	-32.7771	133.631	-69.4042	-38.3245	-20.39	-146.754	49.7661	-138.768	-197.179
0	0	0	0	0	0	0	0	0	0	0	0	0	0	0	0	0	0	0	0	0	0	0	0	76.1093	0	0	0	0	0	0	0	0	0	0	0	0	0	0	0	25	-8.7547	-49.2997	24.4855	19.1539	-1.25205	33.0891	-7.83007	21.1038	44.4871
0.0110485	0	0	0	0	0	0	0	0	0	0	0	0	0	0	0	0	0	0	0	0	0	0	0	0	0	0	0	0	0	0	0	0	0	0	0	0	0	0	0	26-dimensional	1758.67	351.737	13.4704	170.79	-31.1716	897.093	61.473	-201.521	-1321.82
0	30.6073	0	0	0	0	0	0	0	0	0	0	0	0	0	0	0	0	0	0	0	0	0	0	0	0	0	0	0	0	0	0	0	0	0	0	0	0	0	0	2	351.737	1904.93	483.982	-22.6632	67.2602	205.602	-2.49719	-14.7654	-734.13
0	0	77.7928	0	0	0	0	0	0	0	0	0	0	0	0	0	0	0	0	0	0	0	0	0	0	0	0	0	0	0	0	0	0	0	0	0	0	0	0	0	3	13.4704	483.982	3774.17	-104.321	296.387	315.775	-141.181	170.768	171.426
0	0	0	30.8239	0	0	0	0	0	0	0	0	0	0	0	0	0	0	0	0	0	0	0	0	0	0	0	0	0	0	0	0	0	0	0	0	0	0	0	0	4	170.79	-22.6632	-104.321	2573.83	-287.397	-706.895	429.683	-613.236	-513.208
0	0	0	0	12.5108	0	0	0	0	0	0	0	0	0	0	0	0	0	0	0	0	0	0	0	0	0	0	0	0	0	0	0	0	0	0	0	0	0	0	0	5	-31.1716	67.2602	296.387	-287.397	1478	313.832	33.7004	557.255	384.841
0	0	0	0	0	45.9662	0	0	0	0	0	0	0	0	0	0	0	0	0	0	0	0	0	0	0	0	0	0	0	0	0	0	0	0	0	0	0	0	0	0	6	897.093	205.602	315.775	-706.895	313.832	2108.93	61.9056	-105.239	-359.929
0	0	0	0	0	0	77.5373	0	0	0	0	0	0	0	0	0	0	0	0	0	0	0	0	0	0	0	0	0	0	0	0	0	0	0	0	0	0	0	0	0	7	61.473	-2.49719	-141.181	429.683	33.7004	61.9056	2752.09	336.487	-144.351
0	0	0	0	0	0	0	34.7909	0	0	0	0	0	0	0	0	0	0	0	0	0	0	0	0	0	0	0	0	0	0	0	0	0	0	0	0	0	0	0	0	8	-201.521	-14.7654	170.768	-613.236	557.255	-105.239	336.487	1813.05	772.362
0	0	0	0	0	0	0	0	62.9701	0	0	0	0	0	0	0	0	0	0	0	0	0	0	0	0	0	0	0	0	0	0	0	0	0	0	0	0	0	0	0	9	-1321.82	-734.13	171.426	-513.208	384.841	-359.929	-144.351	772.362	2899.43
0	0	0	0	0	0	0	0	0	56.8355	0	0	0	0	0	0	0	0	0	0	0	0	0	0	0	0	0	0	0	0	0	0	0	0	0	0	0	0	0	0	10	-228.328	-236.081	415.146	286.829	201.851	23.463	205.968	250.028	345.474
0	0	0	0	0	0	0	0	0	0	40.7706	0	0	0	0	0	0	0	0	0	0	0	0	0	0	0	0	0	0	0	0	0	0	0	0	0	0	0	0	0	11	-289.728	-124.892	226.129	456.024	328.132	-289.377	-244.631	-514.141	-281.737
0	0	0	0	0	0	0	0	0	0	0	42.8728	0	0	0	0	0	0	0	0	0	0	0	0	0	0	0	0	0	0	0	0	0	0	0	0	0	0	0	0	12	434.428	66.1968	441.353	-588.084	276.677	285.504	-3.46092	245.214	68.8397
0	0	0	0	0	0	0	0	0	0	0	0	85.9582	0	0	0	0	0	0	0	0	0	0	0	0	0	0	0	0	0	0	0	0	0	0	0	0	0	0	0	13	-24.1168	-77.4881	421.724	762.012	38.4905	-3.47828	-107.194	-557.924	-355.978
0	0	0	0	0	0	0	0	0	0	0	0	0	7.56746	0	0	0	0	0	0	0	0	0	0	0	0	0	0	0	0	0	0	0	0	0	0	0	0	0	0	14	-445.059	-200.671	-26.8872	16.6575	-162.889	2.57756	408.859	-43.9784	310.754
0	0	0	0	0	0	0	0	0	0	0	0	0	0	25.3352	0	0	0	0	0	0	0	0	0	0	0	0	0	0	0	0	0	0	0	0	0	0	0	0	0	15	261.523	-76.1934	150.501	-26.8996	89.4034	228.105	-298.744	4.99084	158.555
0	0	0	0	0	0	0	0	0	0	0	0	0	0	0	40.4646	0	0	0	0	0	0	0	0	0	0	0	0	0	0	0	0	0	0	0	0	0	0	0	0	16	95.5628	230.804	133.503	369.498	541.365	164.042	3.01253	187.825	112.329
0	0	0	0	0	0	0	0	0	0	0	0	0	0	0	0	53.1854	0	0	0	0	0	0	0	0	0	0	0	0	0	0	0	0	0	0	0	0	0	0	0	17	-355.193	-178.772	363.65	50.5321	-46.7698	-22.7266	240.215	-35.8192	287.999
0	0	0	0	0	0	0	0	0	0	0	0	0	0	0	0	0	79.4357	0	0	0	0	0	0	0	0	0	0	0	0	0	0	0	0	0	0	0	0	0	0	18	-67.0885	-447.389	-244.423	-373.788	174.158	256.649	12.6423	171.899	403.907
0	0	0	0	0	0	0	0	0	0	0	0	0	0	0	0	0	0	42.464	0	0	0	0	0	0	0	0	0	0	0	0	0	0	0	0	0	0	0	0	0	19	7.65612	203.757	168.257	-284.184	71.2721	191.971	397.446	-116.367	-215.271
0	0	0	0	0	0	0	0	0	0	0	0	0	0	0	0	0	0	0	39.5968	0	0	0	0	0	0	0	0	0	0	0	0	0	0	0	0	0	0	0	0	20	-137.528	-172.094	26.1628	-250.025	-15.7582	242.895	-123.666	-17.09	212.153
0	0	0	0	0	0	0	0	0	0	0	0	0	0	0	0	0	0	0	0	67.5398	0	0	0	0	0	0	0	0	0	0	0	0	0	0	0	0	0	0	0	21	-392.37	-38.1844	40.281	395.288	-104.712	-360.122	238.587	-354.582	-170.349
0	0	0	0	0	0	0	0	0	0	0	0	0	0	0	0	0	0	0	0	0	42.3563	0	0	0	0	0	0	0	0	0	0	0	0	0	0	0	0	0	0	22	201.662	71.5907	101.388	-397.334	236.796	166.716	-106.425	307.676	122.69
0	0	0	0	0	0	0	0	0	0	0	0	0	0	0	0	0	0	0	0	0	0	77.9147	0	0	0	0	0	0	0	0	0	0	0	0	0	0	0	0	0	23	53.4574	97.8761	-86.251	-53.6785	14.5442	-46.2078	36.8792	142.53	141.874
0	0	0	0	0	0	0	0	0	0	0	0	0	0	0	0	0	0	0	0	0	0	0	42.2297	0	0	0	0	0	0	0	0	0	0	0	0	0	0	0	0	24	-130.281	-78.2962	-11.0603	168.473	-168.096	-78.0042	-8.93491	-174.883	-178.091
0	0	0	0	0	0	0	0	0	0	0	0	0	0	0	0	0	0	0	0	0	0	0	0	45.0888	0	0	0	0	0	0	0	0	0	0	0	0	0	0	0	25	-86.1204	-17.0215	-64.8033	212.144	-173.489	7.43636	145.447	-180.608	12.4865
0	0	0	0	0	0	0	0	0	0	0	0	0	0	0	0	0	0	0	0	0	0	0	0	0	90.5097	0	0	0	0	0	0	0	0	0	0	0	0	0	0	26	-100.829	-24.8146	-47.6263	193.147	-142.31	-44.108	85.6042	-143.743	-47.7409
0.00929068	0	0	0	0	0	0	0	0	0	0	0	0	0	0	0	0	0	0	0	0	0	0	0	0	0	0	0	0	0	0	0	0	0	0	0	0	0	0	0	27-dimensional	2535.94	747.612	-367.714	-11.2699	-842.017	-798.241	-88.0926	-439.196	5.8911
0	52.4692	0	0	0	0	0	0	0	0	0	0	0	0	0	0	0	0	0	0	0	0	0	0	0	0	0	0	0	0	0	0	0	0	0	0	0	0	0	0	2	747.612	3024.64	118.717	-337.137	210.745	-334.652	90.0015	158.983	599.505
0	0	24.706	0	0	0	0	0	0	0	0	0	0	0	0	0	0	0	0	0	0	0	0	0	0	0	0	0	0	0	0	0	0	0	0	0	0	0	0	0	3	-367.714	118.717	3567.65	791.821	114.697	407.839	-91.3604	908.596	812.923
0	0	0	9.21689	0	0	0	0	0	0	0	0	0	0	0	0	0	0	0	0	0	0	0	0	0	0	0	0	0	0	0	0	0	0	0	0	0	0	0	0	4	-11.2699	-337.137	791.821	2208.99	-500.504	1962.1	-138.67	-153.21	93.7715
0	0	0	0	7.26145	0	0	0	0	0	0	0	0	0	0	0	0	0	0	0	0	0	0	0	0	0	0	0	0	0	0	0	0	0	0	0	0	0	0	0	5	-842.017	210.745	114.697	-500.504	1594.73	-332.683	161.443	696.488	401.795
0	0	0	0	0	95.6228	0	0	0	0	0	0	0	0	0	0	0	0	0	0	0	0	0	0	0	0	0	0	0	0	0	0	0	0	0	0	0	0	0	0	6	-798.241	-334.652	407.839	1962.1	-332.683	4386.46	-180.178	-1150.08	-121.636
0	0	0	0	0	0	25.1041	0	0	0	0	0	0	0	0	0	0	0	0	0	0	0	0	0	0	0	0	0	0	0	0	0	0	0	0	0	0	0	0	0	7	-88.0926	90.0015	-91.3604	-138.67	161.443	-180.178	1134.77	-401.085	-574.807
0	0	0	0	0	0	0	92.7389	0	0	0	0	0	0	0	0	0	0	0	0	0	0	0	0	0	0	0	0	0	0	0	0	0	0	0	0	0	0	0	0	8	-439.196	158.983	908.596	-153.21	696.488	-1150.08	-401.085	3120.29	435.047
0	0	0	0	0	0	0	0	76.6101	0	0	0	0	0	0	0	0	0	0	0	0	0	0	0	0	0	0	0	0	0	0	0	0	0	0	0	0	0	0	0	9	5.8911	599.505	812.923	93.7715	401.795	-121.636	-574.807	435.047	2439.62
0	0	0	0	0	0	0	0	0	93.9462	0	0	0	0	0	0	0	0	0	0	0	0	0	0	0	0	0	0	0	0	0	0	0	0	0	0	0	0	0	0	10	294.819	276.075	-14.1058	921.607	-601.253	723.705	-382.618	63.5907	495.009
0	0	0	0	0	0	0	0	0	0	100.962	0	0	0	0	0	0	0	0	0	0	0	0	0	0	0	0	0	0	0	0	0	0	0	0	0	0	0	0	0	11	-1600.11	318.72	167.776	-188.298	595.654	49.473	-212.884	251.929	230.742
0	0	0	0	0	0	0	0	0	0	0	15.0434	0	0	0	0	0	0	0	0	0	0	0	0	0	0	0	0	0	0	0	0	0	0	0	0	0	0	0	0	12	-149.559	-61.7125	-17.1357	76.3059	233.589	-581.612	610.859	462.829	-284.161
0	0	0	0	0	0	0	0	0	0	0	0	42.403	0	0	0	0	0	0	0	0	0	0	0	0	0	0	0	0	0	0	0	0	0	0	0	0	0	0	0	13	119.967	221.849	10.0961	86.6688	-172.1	340.582	-196.774	-629.242	37.7023
0	0	0	0	0	0	0	0	0	0	0	0	0	105.543	0	0	0	0	0	0	0	0	0	0	0	0	0	0	0	0	0	0	0	0	0	0	0	0	0	0	14	-532.004	192.154	-131.727	-319.398	485.982	734.266	-100.755	-387.021	419.172
0	0	0	0	0	0	0	0	0	0	0	0	0	0	69.4055	0	0	0	0	0	0	0	0	0	0	0	0	0	0	0	0	0	0	0	0	0	0	0	0	0	15	-495.489	-415.495	642.861	5.88928	-66.117	221.765	-90.4244	-58.821	155.888
0	0	0	0	0	0	0	0	0	0	0	0	0	0	0	96.4858	0	0	0	0	0	0	0	0	0	0	0	0	0	0	0	0	0	0	0	0	0	0	0	0	16	278.736	-567.993	-803.832	245.598	-709.553	569.21	-628.232	-508.231	-554.915
0	0	0	0	0	0	0	0	0	0	0	0	0	0	0	0	51.9096	0	0	0	0	0	0	0	0	0	0	0	0	0	0	0	0	0	0	0	0	0	0	0	17	-281.912	-183.36	211.053	369.387	-507.352	474.65	-56.3338	-6.82667	162.878
0	0	0	0	0	0	0	0	0	0	0	0	0	0	0	0	0	1.52606	0	0	0	0	0	0	0	0	0	0	0	0	0	0	0	0	0	0	0	0	0	0	18	-89.3234	-234.049	107.366	276.846	-321.3	119.387	30.2365	-70.5497	-223.526
0	0	0	0	0	0	0	0	0	0	0	0	0	0	0	0	0	0	67.0471	0	0	0	0	0	0	0	0	0	0	0	0	0	0	0	0	0	0	0	0	0	19	80.0057	-60.6108	-271	38.9207	288.134	-383.398	13.8457	100.058	-291.608
0	0	0	0	0	0	0	0	0	0	0	0	0	0	0	0	0	0	0	24.881	0	0	0	0	0	0	0	0	0	0	0	0	0	0	0	0	0	0	0	0	20	125.662	66.3797	252.925	-19.1476	-379.067	245.361	-273.872	-58.8815	168.852
0	0	0	0	0	0	0	0	0	0	0	0	0	0	0	0	0	0	0	0	56.7746	0	0	0	0	0	0	0	0	0	0	0	0	0	0	0	0	0	0	0	21	217.875	192.689	-191.462	-126.416	288.544	-182.762	-120.3	157.778	-74.6394
0	0	0	0	0	0	0	0	0	0	0	0	0	0	0	0	0	0	0	0	0	78.0369	0	0	0	0	0	0	0	0	0	0	0	0	0	0	0	0	0	0	22	-358.402	-158.358	-291.027	101.609	441.427	-316.795	317.865	431.429	-702.214
0	0	0	0	0	0	0	0	0	0	0	0	0	0	0	0	0	0	0	0	0	0	65.3827	0	0	0	0	0	0	0	0	0	0	0	0	0	0	0	0	0	23	29.7175	-213.865	-45.4012	24.4502	-273.563	32.9264	15.4693	-271.488	-14.9714
0	0	0	0	0	0	0	0	0	0	0	0	0	0	0	0	0	0	0	0	0	0	0	63.3325	0	0	0	0	0	0	0	0	0	0	0	0	0	0	0	0	24	-73.9155	50.9932	329.685	-45.2694	153.324	98.9618	-89.6186	163.332	148.079
0	0	0	0	0	0	0	0	0	0	0	0	0	0	0	0	0	0	0	0	0	0	0	0	46.6579	0	0	0	0	0	0	0	0	0	0	0	0	0	0	0	25	-7.04105	-18.525	-207.719	-45.3354	90.8137	-121.583	104.884	-5.00797	-154.419
0	0	0	0	0	0	0	0	0	0	0	0	0	0	0	0	0	0	0	0	0	0	0	0	0	26.2885	0	0	0	0	0	0	0	0	0	0	0	0	0	0	26	-27.4773	-136.869	-161.699	-181.126	36.2941	-81.6412	46.823	-75.9566	-149.856
0	0	0	0	0	0	0	0	0	0	0	0	0	0	0	0	0	0	0	0	0	0	0	0	0	0	107.635	0	0	0	0	0	0	0	0	0	0	0	0	0	27	-27.0828	-70.0785	-177.663	-17.6078	69.9797	-120.748	85.9913	8.76397	-122.819
0.0078125	0	0	0	0	0	0	0	0	0	0	0	0	0	0	0	0	0	0	0	0	0	0	0	0	0	0	0	0	0	0	0	0	0	0	0	0	0	0	0	28-dimensional	920.382	160.255	-7.2411	-737.049	-608.444	-69.4162	147.704	222.841	-81.636
0	54.9114	0	0	0	0	0	0	0	0	0	0	0	0	0	0	0	0	0	0	0	0	0	0	0	0	0	0	0	0	0	0	0	0	0	0	0	0	0	0	2	160.255	4193.41	819.136	-190.005	-608.942	-195.198	20.3105	-617.424	-155.676
0	0	1.31045	0	0	0	0	0	0	0	0	0	0	0	0	0	0	0	0	0	0	0	0	0	0	0	0	0	0	0	0	0	0	0	0	0	0	0	0	0	3	-7.2411	819.136	1727.03	951.996	-615.018	-40.8815	226.298	102.867	173.431
0	0	0	77.9322	0	0	0	0	0	0	0	0	0	0	0	0	0	0	0	0	0	0	0	0	0	0	0	0	0	0	0	0	0	0	0	0	0	0	0	0	4	-737.049	-190.005	951.996	3359.74	-920.864	124.096	873.68	669.856	-146.044
0	0	0	0	122.621	0	0	0	0	0	0	0	0	0	0	0	0	0	0	0	0	0	0	0	0	0	0	0	0	0	0	0	0	0	0	0	0	0	0	0	5	-608.444	-608.942	-615.018	-920.864	5101.39	244.059	-362.832	83.3145	-370.978
0	0	0	0	0	12.2242	0	0	0	0	0	0	0	0	0	0	0	0	0	0	0	0	0	0	0	0	0	0	0	0	0	0	0	0	0	0	0	0	0	0	6	-69.4162	-195.198	-40.8815	124.096	244.059	1273.97	91.416	-55.9838	254.195
0	0	0	0	0	0	4.56313	0	0	0	0	0	0	0	0	0	0	0	0	0	0	0	0	0	0	0	0	0	0	0	0	0	0	0	0	0	0	0	0	0	7	147.704	20.3105	226.298	873.68	-362.832	91.416	2155.1	296.874	-506.471
0	0	0	0	0	0	0	113.439	0	0	0	0	0	0	0	0	0	0	0	0	0	0	0	0	0	0	0	0	0	0	0	0	0	0	0	0	0	0	0	0	8	222.841	-617.424	102.867	669.856	83.3145	-55.9838	296.874	3804.76	-133.093
0	0	0	0	0	0	0	0	31.6144	0	0	0	0	0	0	0	0	0	0	0	0	0	0	0	0	0	0	0	0	0	0	0	0	0	0	0	0	0	0	0	9	-81.636	-155.676	173.431	-146.044	-370.978	254.195	-506.471	-133.093	1959.23
0	0	0	0	0	0	0	0	0	1.14887	0	0	0	0	0	0	0	0	0	0	0	0	0	0	0	0	0	0	0	0	0	0	0	0	0	0	0	0	0	0	10	59.7834	154.404	-76.2555	139.63	41.0022	-91.2342	-197.661	580.819	-294.856
0	0	0	0	0	0	0	0	0	0	104.311	0	0	0	0	0	0	0	0	0	0	0	0	0	0	0	0	0	0	0	0	0	0	0	0	0	0	0	0	0	11	-212.947	-1178.07	-1098.8	-335.774	848.425	-125.827	-349.151	519.068	-497.18
0	0	0	0	0	0	0	0	0	0	0	17.9906	0	0	0	0	0	0	0	0	0	0	0	0	0	0	0	0	0	0	0	0	0	0	0	0	0	0	0	0	12	77.9822	136.425	342.6	-89.035	350.159	453.301	-386.008	6.04944	526.911
0	0	0	0	0	0	0	0	0	0	0	0	112.624	0	0	0	0	0	0	0	0	0	0	0	0	0	0	0	0	0	0	0	0	0	0	0	0	0	0	0	13	295.011	-526.56	350.377	-571.754	-681.005	-302.225	203.497	-558.464	-31.8107
0	0	0	0	0	0	0	0	0	0	0	0	0	12.2153	0	0	0	0	0	0	0	0	0	0	0	0	0	0	0	0	0	0	0	0	0	0	0	0	0	0	14	126.48	231.026	64.8868	152.09	-194.961	-346.695	434.631	-466.865	-470
0	0	0	0	0	0	0	0	0	0	0	0	0	0	45.1328	0	0	0	0	0	0	0	0	0	0	0	0	0	0	0	0	0	0	0	0	0	0	0	0	0	15	-177.996	-639.13	111.61	-375.824	698.5	13.6929	-357.574	419.231	234.825
0	0	0	0	0	0	0	0	0	0	0	0	0	0	0	75.961	0	0	0	0	0	0	0	0	0	0	0	0	0	0	0	0	0	0	0	0	0	0	0	0	16	89.0246	423.916	291.997	242.095	-82.0446	-327.728	28.7525	-311.906	-424.26
0	0	0	0	0	0	0	0	0	0	0	0	0	0	0	0	74.9065	0	0	0	0	0	0	0	0	0	0	0	0	0	0	0	0	0	0	0	0	0	0	0	17	-267.411	-69.9751	64.5345	229.082	-176.056	-409.104	-22.4887	-28.6571	124.462
0	0	0	0	0	0	0	0	0	0	0	0	0	0	0	0	0	85.4659	0	0	0	0	0	0	0	0	0	0	0	0	0	0	0	0	0	0	0	0	0	0	18	-445.596	-854.677	-312.942	-413.96	669.066	-159.666	-463.904	218.92	-148.827
0	0	0	0	0	0	0	0	0	0	0	0	0	0	0	0	0	0	82.9502	0	0	0	0	0	0	0	0	0	0	0	0	0	0	0	0	0	0	0	0	0	19	-183.019	-415.048	-178.739	122.705	89.3713	-114.392	-294.323	166.622	104.672
0	0	0	0	0	0	0	0	0	0	0	0	0	0	0	0	0	0	0	55.4757	0	0	0	0	0	0	0	0	0	0	0	0	0	0	0	0	0	0	0	0	20	-59.5766	-635.764	-412.989	-228.427	28.5706	-59.3979	-177.312	-91.2085	133.198
0	0	0	0	0	0	0	0	0	0	0	0	0	0	0	0	0	0	0	0	17.8958	0	0	0	0	0	0	0	0	0	0	0	0	0	0	0	0	0	0	0	21	-43.0314	39.9932	41.9739	-174.816	567.639	85.3653	-167.282	-185.067	-53.9989
0	0	0	0	0	0	0	0	0	0	0	0	0	0	0	0	0	0	0	0	0	96.2489	0	0	0	0	0	0	0	0	0	0	0	0	0	0	0	0	0	0	22	-9.99002	-236.273	-133.909	3.79337	-409.813	195.538	-248.932	186.809	687.802
0	0	0	0	0	0	0	0	0	0	0	0	0	0	0	0	0	0	0	0	0	0	30.9546	0	0	0	0	0	0	0	0	0	0	0	0	0	0	0	0	0	23	-40.9672	-153.918	-75.4647	-81.7234	367.28	218.42	-215.852	-47.7754	281.413
0	0	0	0	0	0	0	0	0	0	0	0	0	0	0	0	0	0	0	0	0	0	0	83.2615	0	0	0	0	0	0	0	0	0	0	0	0	0	0	0	0	24	-188.665	-428.012	-365.24	-227.569	263.129	76.2946	-409.714	-306.285	319.088
0	0	0	0	0	0	0	0	0	0	0	0	0	0	0	0	0	0	0	0	0	0	0	0	109.745	0	0	0	0	0	0	0	0	0	0	0	0	0	0	0	25	-34.8468	-484.539	-391.822	-418.926	-139.088	-362.783	-487.147	157.864	-18.068
0	0	0	0	0	0	0	0	0	0	0	0	0	0	0	0	0	0	0	0	0	0	0	0	0	10.8066	0	0	0	0	0	0	0	0	0	0	0	0	0	0	26	-33.6255	-304.474	-121.846	62.0005	-421.217	-113.395	-2.55673	25.1804	110.046
0	0	0	0	0	0	0	0	0	0	0	0	0	0	0	0	0	0	0	0	0	0	0	0	0	0	124.428	0	0	0	0	0	0	0	0	0	0	0	0	0	27	-117.691	-212.938	-81.3944	-31.8968	224.029	299.712	-188.06	-160.111	377.282
0	0	0	0	0	0	0	0	0	0	0	0	0	0	0	0	0	0	0	0	0	0	0	0	0	0	0	128	0	0	0	0	0	0	0	0	0	0	0	0	28	11.3726	-12.5641	-11.2143	19.2368	-106.522	-60.4706	35.8848	28.2137	-38.1014
0.0065695	0	0	0	0	0	0	0	0	0	0	0	0	0	0	0	0	0	0	0	0	0	0	0	0	0	0	0	0	0	0	0	0	0	0	0	0	0	0	0	29-dimensional	2700.72	365.351	606.318	432.402	105.258	998.251	-1445.36	136.958	240.039
0	4.79515	0	0	0	0	0	0	0	0	0	0	0	0	0	0	0	0	0	0	0	0	0	0	0	0	0	0	0	0	0	0	0	0	0	0	0	0	0	0	2	365.351	2002.81	11.0149	53.851	132.776	253.245	-385.175	562.942	991.924
0	0	127.165	0	0	0	0	0	0	0	0	0	0	0	0	0	0	0	0	0	0	0	0	0	0	0	0	0	0	0	0	0	0	0	0	0	0	0	0	0	3	606.318	11.0149	4027.18	1423.23	-122.439	-82.0613	141.9	-434.512	-180.982
0	0	0	127.212	0	0	0	0	0	0	0	0	0	0	0	0	0	0	0	0	0	0	0	0	0	0	0	0	0	0	0	0	0	0	0	0	0	0	0	0	4	432.402	53.851	1423.23	3969.76	383.745	228.499	408.392	920.866	-1003.99
0	0	0	0	7.59548	0	0	0	0	0	0	0	0	0	0	0	0	0	0	0	0	0	0	0	0	0	0	0	0	0	0	0	0	0	0	0	0	0	0	0	5	105.258	132.776	-122.439	383.745	2180.44	-226.045	1232.32	1276.56	367.089
0	0	0	0	0	83.097	0	0	0	0	0	0	0	0	0	0	0	0	0	0	0	0	0	0	0	0	0	0	0	0	0	0	0	0	0	0	0	0	0	0	6	998.251	253.245	-82.0613	228.499	-226.045	2292.59	-351.321	-532.854	-5.94539
0	0	0	0	0	0	143.568	0	0	0	0	0	0	0	0	0	0	0	0	0	0	0	0	0	0	0	0	0	0	0	0	0	0	0	0	0	0	0	0	0	7	-1445.36	-385.175	141.9	408.392	1232.32	-351.321	3553.63	295.224	300.381
0	0	0	0	0	0	0	48.9386	0	0	0	0	0	0	0	0	0	0	0	0	0	0	0	0	0	0	0	0	0	0	0	0	0	0	0	0	0	0	0	0	8	136.958	562.942	-434.512	920.866	1276.56	-532.854	295.224	2827.09	-215.602
0	0	0	0	0	0	0	0	122.76	0	0	0	0	0	0	0	0	0	0	0	0	0	0	0	0	0	0	0	0	0	0	0	0	0	0	0	0	0	0	0	9	240.039	991.924	-180.982	-1003.99	367.089	-5.94539	300.381	-215.602	3364.35
0	0	0	0	0	0	0	0	0	91.5466	0	0	0	0	0	0	0	0	0	0	0	0	0	0	0	0	0	0	0	0	0	0	0	0	0	0	0	0	0	0	10	512.77	-317.901	428.048	622.064	-1247.02	643.406	-456.515	-657.005	-675.473
0	0	0	0	0	0	0	0	0	0	120.196	0	0	0	0	0	0	0	0	0	0	0	0	0	0	0	0	0	0	0	0	0	0	0	0	0	0	0	0	0	11	-229.526	-64.3222	251.384	-406.059	609.592	717.799	-68.7808	61.6904	283.19
0	0	0	0	0	0	0	0	0	0	0	121.652	0	0	0	0	0	0	0	0	0	0	0	0	0	0	0	0	0	0	0	0	0	0	0	0	0	0	0	0	12	-80.854	-604.286	1802.99	-282.222	-46.585	117.091	-140.638	-600.241	-18.1812
0	0	0	0	0	0	0	0	0	0	0	0	7.55092	0	0	0	0	0	0	0	0	0	0	0	0	0	0	0	0	0	0	0	0	0	0	0	0	0	0	0	13	65.8224	354.002	295.006	-557.222	147.727	-179.598	133.768	-158.415	-48.2155
0	0	0	0	0	0	0	0	0	0	0	0	0	43.1128	0	0	0	0	0	0	0	0	0	0	0	0	0	0	0	0	0	0	0	0	0	0	0	0	0	0	14	223.682	311.464	-236.445	52.4653	471.116	-228.029	153.958	186.48	232.16
0	0	0	0	0	0	0	0	0	0	0	0	0	0	99.4705	0	0	0	0	0	0	0	0	0	0	0	0	0	0	0	0	0	0	0	0	0	0	0	0	0	15	288.702	-231.583	-526.876	-77.5415	243.837	177.001	-93.9251	130.237	291.589
0	0	0	0	0	0	0	0	0	0	0	0	0	0	0	74.538	0	0	0	0	0	0	0	0	0	0	0	0	0	0	0	0	0	0	0	0	0	0	0	0	16	-340.358	-161.011	195.348	34.8222	-439.442	-374.54	-345.139	-225.277	-365.884
0	0	0	0	0	0	0	0	0	0	0	0	0	0	0	0	148.086	0	0	0	0	0	0	0	0	0	0	0	0	0	0	0	0	0	0	0	0	0	0	0	17	672.217	-346.859	354.408	92.6077	1091.07	-26.9508	1188.63	-309.825	1184.36
0	0	0	0	0	0	0	0	0	0	0	0	0	0	0	0	0	113.936	0	0	0	0	0	0	0	0	0	0	0	0	0	0	0	0	0	0	0	0	0	0	18	105.934	281.542	-21.6494	-289.579	583.891	-365.373	-131.351	938.349	-379.856
0	0	0	0	0	0	0	0	0	0	0	0	0	0	0	0	0	0	86.4388	0	0	0	0	0	0	0	0	0	0	0	0	0	0	0	0	0	0	0	0	0	19	770.911	-534.184	-367.942	420.39	657.067	128.239	-436.36	655.86	-638.325
0	0	0	0	0	0	0	0	0	0	0	0	0	0	0	0	0	0	0	45.5125	0	0	0	0	0	0	0	0	0	0	0	0	0	0	0	0	0	0	0	0	20	-112.933	453.512	206.345	-77.2376	237.866	-161.228	278.859	143.565	398.31
0	0	0	0	0	0	0	0	0	0	0	0	0	0	0	0	0	0	0	0	38.9895	0	0	0	0	0	0	0	0	0	0	0	0	0	0	0	0	0	0	0	21	404.19	54.3323	-140.749	-54.5098	281.289	77.7422	-599.299	50.4302	-171.309
0	0	0	0	0	0	0	0	0	0	0	0	0	0	0	0	0	0	0	0	0	134.952	0	0	0	0	0	0	0	0	0	0	0	0	0	0	0	0	0	0	22	490.944	-192.621	304.881	622.273	-104.942	106.822	182.531	-348.536	525.361
0	0	0	0	0	0	0	0	0	0	0	0	0	0	0	0	0	0	0	0	0	0	68.015	0	0	0	0	0	0	0	0	0	0	0	0	0	0	0	0	0	23	-171.473	212.999	466.88	13.8724	35.9902	-123.691	537.848	-93.5003	168.756
0	0	0	0	0	0	0	0	0	0	0	0	0	0	0	0	0	0	0	0	0	0	0	124.21	0	0	0	0	0	0	0	0	0	0	0	0	0	0	0	0	24	469.237	-201.58	187.013	-37.5953	-270.427	89.7119	-176.474	-505.293	-132.548
0	0	0	0	0	0	0	0	0	0	0	0	0	0	0	0	0	0	0	0	0	0	0	0	14.9747	0	0	0	0	0	0	0	0	0	0	0	0	0	0	0	25	311.581	-160.909	57.9433	264.901	-98.4898	153.875	-356.971	-160.678	165.933
0	0	0	0	0	0	0	0	0	0	0	0	0	0	0	0	0	0	0	0	0	0	0	0	0	130.847	0	0	0	0	0	0	0	0	0	0	0	0	0	0	26	728.847	-143.083	354.099	527.764	17.5706	158.48	-297.773	-284.852	610.765
0	0	0	0	0	0	0	0	0	0	0	0	0	0	0	0	0	0	0	0	0	0	0	0	0	0	4.21203	0	0	0	0	0	0	0	0	0	0	0	0	0	27	-143.852	108.321	48.7977	-134.11	68.4486	-110.857	218.743	50.6113	-11.1878
0	0	0	0	0	0	0	0	0	0	0	0	0	0	0	0	0	0	0	0	0	0	0	0	0	0	0	136.869	0	0	0	0	0	0	0	0	0	0	0	0	28	-84.1847	-74.9308	-90.3842	-34.4387	-119.115	73.2445	-163.831	2.42481	-134.777
0	0	0	0	0	0	0	0	0	0	0	0	0	0	0	0	0	0	0	0	0	0	0	0	0	0	0	0	152.219	0	0	0	0	0	0	0	0	0	0	0	29	60.7798	-41.2776	-16.395	56.5923	-20.4722	44.2112	-78.0939	-21.0486	10.4998
0.00552427	0	0	0	0	0	0	0	0	0	0	0	0	0	0	0	0	0	0	0	0	0	0	0	0	0	0	0	0	0	0	0	0	0	0	0	0	0	0	0	30-dimensional	4024.17	1368.84	322.956	310.66	250.109	1007.4	1483.46	951.956	1144.9
0	162.906	0	0	0	0	0	0	0	0	0	0	0	0	0	0	0	0	0	0	0	0	0	0	0	0	0	0	0	0	0	0	0	0	0	0	0	0	0	0	2	1368.84	6298.41	1.06365	-584.181	-149.799	-146.61	-540.202	201.214	780.801
0	0	94.876	0	0	0	0	0	0	0	0	0	0	0	0	0	0	0	0	0	0	0	0	0	0	0	0	0	0	0	0	0	0	0	0	0	0	0	0	0	3	322.956	1.06365	4613.48	608.176	312.833	-1472.16	410.178	-324.376	436.261
0	0	0	21.7633	0	0	0	0	0	0	0	0	0	0	0	0	0	0	0	0	0	0	0	0	0	0	0	0	0	0	0	0	0	0	0	0	0	0	0	0	4	310.66	-584.181	608.176	2996.05	599.743	657.442	-407.168	-50.0137	-539.118
0	0	0	0	32.1887	0	0	0	0	0	0	0	0	0	0	0	0	0	0	0	0	0	0	0	0	0	0	0	0	0	0	0	0	0	0	0	0	0	0	0	5	250.109	-149.799	312.833	599.743	1969.88	724.362	-753.461	-456.307	-574.196
0	0	0	0	0	127.821	0	0	0	0	0	0	0	0	0	0	0	0	0	0	0	0	0	0	0	0	0	0	0	0	0	0	0	0	0	0	0	0	0	0	6	1007.4	-146.61	-1472.16	657.442	724.362	5295.69	410.269	-369.078	-1117.41
0	0	0	0	0	0	150.493	0	0	0	0	0	0	0	0	0	0	0	0	0	0	0	0	0	0	0	0	0	0	0	0	0	0	0	0	0	0	0	0	0	7	1483.46	-540.202	410.178	-407.168	-753.461	410.269	5840.92	652.359	1452.79
0	0	0	0	0	0	0	6.31093	0	0	0	0	0	0	0	0	0	0	0	0	0	0	0	0	0	0	0	0	0	0	0	0	0	0	0	0	0	0	0	0	8	951.956	201.214	-324.376	-50.0137	-456.307	-369.078	652.359	1283.25	935.659
0	0	0	0	0	0	0	0	137.185	0	0	0	0	0	0	0	0	0	0	0	0	0	0	0	0	0	0	0	0	0	0	0	0	0	0	0	0	0	0	0	9	1144.9	780.801	436.261	-539.118	-574.196	-1117.41	1452.79	935.659	4294.86
0	0	0	0	0	0	0	0	0	173.256	0	0	0	0	0	0	0	0	0	0	0	0	0	0	0	0	0	0	0	0	0	0	0	0	0	0	0	0	0	0	10	393.744	-309.966	915.736	-890.214	-42.1187	-1238.01	1029.89	1.86258	114.926
0	0	0	0	0	0	0	0	0	0	62.0698	0	0	0	0	0	0	0	0	0	0	0	0	0	0	0	0	0	0	0	0	0	0	0	0	0	0	0	0	0	11	496.55	-215.832	143.556	295.493	31.1038	-22.9426	-487.609	60.8959	465.432
0	0	0	0	0	0	0	0	0	0	0	115.536	0	0	0	0	0	0	0	0	0	0	0	0	0	0	0	0	0	0	0	0	0	0	0	0	0	0	0	0	12	-567.489	369.827	-1248.4	-2294.17	72.1403	1333.75	256.048	-654.836	-610.178
0	0	0	0	0	0	0	0	0	0	0	0	62.0943	0	0	0	0	0	0	0	0	0	0	0	0	0	0	0	0	0	0	0	0	0	0	0	0	0	0	0	13	-877.298	48.2026	-60.5259	244.64	-490.285	-761.203	57.6016	373.662	-386.471
0	0	0	0	0	0	0	0	0	0	0	0	0	39.1898	0	0	0	0	0	0	0	0	0	0	0	0	0	0	0	0	0	0	0	0	0	0	0	0	0	0	14	235.636	335.846	-698.719	-1046.78	-168.354	-1.06158	571.061	49.4225	-158.635
0	0	0	0	0	0	0	0	0	0	0	0	0	0	142.319	0	0	0	0	0	0	0	0	0	0	0	0	0	0	0	0	0	0	0	0	0	0	0	0	0	15	384.159	198.744	-58.8106	-476.272	219.19	1182.3	1176.03	-532.106	191.992
0	0	0	0	0	0	0	0	0	0	0	0	0	0	0	130.895	0	0	0	0	0	0	0	0	0	0	0	0	0	0	0	0	0	0	0	0	0	0	0	0	16	-1539.09	175.088	679.05	584.243	9.35914	-405.563	-557.954	-624.081	36.3961
0	0	0	0	0	0	0	0	0	0	0	0	0	0	0	0	50.4792	0	0	0	0	0	0	0	0	0	0	0	0	0	0	0	0	0	0	0	0	0	0	0	17	-379.796	176.482	-289.979	-619.304	222.258	-339.412	716.274	-49.6457	197.89
0	0	0	0	0	0	0	0	0	0	0	0	0	0	0	0	0	105.434	0	0	0	0	0	0	0	0	0	0	0	0	0	0	0	0	0	0	0	0	0	0	18	-1641.54	125.207	-91.7758	-351.652	-78.3926	-311.648	412.543	-263.106	24.0525
0	0	0	0	0	0	0	0	0	0	0	0	0	0	0	0	0	0	76.2134	0	0	0	0	0	0	0	0	0	0	0	0	0	0	0	0	0	0	0	0	0	19	104.128	255.887	-292.783	-109.531	188.477	217.132	556.826	306.877	-465.195
0	0	0	0	0	0	0	0	0	0	0	0	0	0	0	0	0	0	0	16.6712	0	0	0	0	0	0	0	0	0	0	0	0	0	0	0	0	0	0	0	0	20	-204.524	185.087	236.022	105.748	197.813	-592.882	-523.781	38.6248	167.053
0	0	0	0	0	0	0	0	0	0	0	0	0	0	0	0	0	0	0	0	4.3548	0	0	0	0	0	0	0	0	0	0	0	0	0	0	0	0	0	0	0	21	-1268.79	169.376	57.7282	-720.023	-178.144	-438.848	64.6174	-237.207	-28.4388
0	0	0	0	0	0	0	0	0	0	0	0	0	0	0	0	0	0	0	0	0	88.9097	0	0	0	0	0	0	0	0	0	0	0	0	0	0	0	0	0	0	22	-586.23	-83.534	437.301	366.461	348.497	-810.245	-557.31	-83.5977	152.259
0	0	0	0	0	0	0	0	0	0	0	0	0	0	0	0	0	0	0	0	0	0	50.3757	0	0	0	0	0	0	0	0	0	0	0	0	0	0	0	0	0	23	285.089	32.9502	-371.039	-155.43	-142.861	115.285	344.633	260.392	-201.076
0	0	0	0	0	0	0	0	0	0	0	0	0	0	0	0	0	0	0	0	0	0	0	61.5063	0	0	0	0	0	0	0	0	0	0	0	0	0	0	0	0	24	-546.824	-198.031	-33.8423	-8.50023	-77.7556	-133.683	-263.326	-272.958	54.448
0	0	0	0	0	0	0	0	0	0	0	0	0	0	0	0	0	0	0	0	0	0	0	0	52.0198	0	0	0	0	0	0	0	0	0	0	0	0	0	0	0	25	-235.703	17.6808	-388.471	-101.798	-69.1935	57.2581	279.706	12.4408	-57.8579
0	0	0	0	0	0	0	0	0	0	0	0	0	0	0	0	0	0	0	0	0	0	0	0	0	30.9414	0	0	0	0	0	0	0	0	0	0	0	0	0	0	26	-1084.53	56.7321	211.933	-486.723	-152.301	-312.746	-221.301	-293.036	-50.0604
0	0	0	0	0	0	0	0	0	0	0	0	0	0	0	0	0	0	0	0	0	0	0	0	0	0	72.2777	0	0	0	0	0	0	0	0	0	0	0	0	0	27	112.731	-326.331	438.75	672.301	11.152	247.009	-377.114	-112.825	4.15161
0	0	0	0	0	0	0	0	0	0	0	0	0	0	0	0	0	0	0	0	0	0	0	0	0	0	0	126.29	0	0	0	0	0	0	0	0	0	0	0	0	28	-34.9482	48.813	-510.384	-454.174	-104.057	221.931	711.545	159.343	-209.885
0	0	0	0	0	0	0	0	0	0	0	0	0	0	0	0	0	0	0	0	0	0	0	0	0	0	0	0	36.8738	0	0	0	0	0	0	0	0	0	0	0	29	-323.963	21.5138	-70.1543	-170.825	-86.012	-64.0908	75.5912	-52.3946	-39.1105
0	0	0	0	0	0	0	0	0	0	0	0	0	0	0	0	0	0	0	0	0	0	0	0	0	0	0	0	0	181.019	0	0	0	0	0	0	0	0	0	0	30	205.646	-18.0264	16.8247	123.625	41.6797	30.73	-62.7136	34.578	27.6935
0.00464534	0	0	0	0	0	0	0	0	0	0	0	0	0	0	0	0	0	0	0	0	0	0	0	0	0	0	0	0	0	0	0	0	0	0	0	0	0	0	0	31-dimensional	2222.14	-863.017	-1042.3	-750.666	750.63	10.5855	338.577	-447.294	-358.703
0	143.441	0	0	0	0	0	0	0	0	0	0	0	0	0	0	0	0	0	0	0	0	0	0	0	0	0	0	0	0	0	0	0	0	0	0	0	0	0	0	2	-863.017	8121.71	1394.65	-1720.05	-691.454	756.852	-862.608	-1752.03	74.8603
0	0	95.3812	0	0	0	0	0	0	0	0	0	0	0	0	0	0	0	0	0	0	0	0	0	0	0	0	0	0	0	0	0	0	0	0	0	0	0	0	0	3	-1042.3	1394.65	6333.02	798.747	-515.084	319.389	-129.913	-1036.58	1588.66
0	0	0	93.2779	0	0	0	0	0	0	0	0	0	0	0	0	0	0	0	0	0	0	0	0	0	0	0	0	0	0	0	0	0	0	0	0	0	0	0	0	4	-750.666	-1720.05	798.747	5243.64	-182.457	569.627	1099.37	-9.43481	915.044
0	0	0	0	37.7275	0	0	0	0	0	0	0	0	0	0	0	0	0	0	0	0	0	0	0	0	0	0	0	0	0	0	0	0	0	0	0	0	0	0	0	5	750.63	-691.454	-515.084	-182.457	5034.54	357.717	721.983	610.254	-302.556
0	0	0	0	0	41.5943	0	0	0	0	0	0	0	0	0	0	0	0	0	0	0	0	0	0	0	0	0	0	0	0	0	0	0	0	0	0	0	0	0	0	6	10.5855	756.852	319.389	569.627	357.717	1675.47	-401.967	-528.142	1271.13
0	0	0	0	0	0	132.698	0	0	0	0	0	0	0	0	0	0	0	0	0	0	0	0	0	0	0	0	0	0	0	0	0	0	0	0	0	0	0	0	0	7	338.577	-862.608	-129.913	1099.37	721.983	-401.967	6208.35	-273.761	-506.955
0	0	0	0	0	0	0	57.9132	0	0	0	0	0	0	0	0	0	0	0	0	0	0	0	0	0	0	0	0	0	0	0	0	0	0	0	0	0	0	0	0	8	-447.294	-1752.03	-1036.58	-9.43481	610.254	-528.142	-273.761	4953.14	-2082.72
0	0	0	0	0	0	0	0	120.484	0	0	0	0	0	0	0	0	0	0	0	0	0	0	0	0	0	0	0	0	0	0	0	0	0	0	0	0	0	0	0	9	-358.703	74.8603	1588.66	915.044	-302.556	1271.13	-506.955	-2082.72	5934.13
0	0	0	0	0	0	0	0	0	203.383	0	0	0	0	0	0	0	0	0	0	0	0	0	0	0	0	0	0	0	0	0	0	0	0	0	0	0	0	0	0	10	542.499	-2018.32	-2948.88	617.784	-897.337	-644.153	1121.59	1484.34	-916.252
0	0	0	0	0	0	0	0	0	0	153.805	0	0	0	0	0	0	0	0	0	0	0	0	0	0	0	0	0	0	0	0	0	0	0	0	0	0	0	0	0	11	-876.833	296.847	229.65	444.031	1731.29	766.63	900.763	1540.94	509.059
0	0	0	0	0	0	0	0	0	0	0	146.217	0	0	0	0	0	0	0	0	0	0	0	0	0	0	0	0	0	0	0	0	0	0	0	0	0	0	0	0	12	-694.733	362.506	-1032.8	-157.244	-1916.24	-143.148	-645.723	-729.482	777.595
0	0	0	0	0	0	0	0	0	0	0	0	206.526	0	0	0	0	0	0	0	0	0	0	0	0	0	0	0	0	0	0	0	0	0	0	0	0	0	0	0	13	-1378.62	1264.24	1316.54	-301.734	-2258.23	93.162	-354.752	-1544.68	2037.89
0	0	0	0	0	0	0	0	0	0	0	0	0	166.907	0	0	0	0	0	0	0	0	0	0	0	0	0	0	0	0	0	0	0	0	0	0	0	0	0	0	14	-341.925	53.9581	2062.77	7.78282	631.157	60.6855	-245.898	1092.37	1911.26
0	0	0	0	0	0	0	0	0	0	0	0	0	0	130.827	0	0	0	0	0	0	0	0	0	0	0	0	0	0	0	0	0	0	0	0	0	0	0	0	0	15	-335.887	-440.953	554.454	336.233	-441.047	217.782	345.69	-1059.63	1876.33
0	0	0	0	0	0	0	0	0	0	0	0	0	0	0	204.076	0	0	0	0	0	0	0	0	0	0	0	0	0	0	0	0	0	0	0	0	0	0	0	0	16	486.543	-597.851	-596.262	137.631	541.558	-518.083	1633.28	-1034.8	963.068
0	0	0	0	0	0	0	0	0	0	0	0	0	0	0	0	12.8434	0	0	0	0	0	0	0	0	0	0	0	0	0	0	0	0	0	0	0	0	0	0	0	17	48.4481	-315.898	-231.786	281.862	500.007	40.9287	1178.23	-797.414	98.6689
0	0	0	0	0	0	0	0	0	0	0	0	0	0	0	0	0	57.849	0	0	0	0	0	0	0	0	0	0	0	0	0	0	0	0	0	0	0	0	0	0	18	-677.088	56.2621	124.032	-90.4689	374.168	108.74	-64.0451	638.224	-587.472
0	0	0	0	0	0	0	0	0	0	0	0	0	0	0	0	0	0	212.402	0	0	0	0	0	0	0	0	0	0	0	0	0	0	0	0	0	0	0	0	0	19	307.185	-1008.44	-974.659	746.86	1017.49	-115.826	907.801	330.899	-785.35
0	0	0	0	0	0	0	0	0	0	0	0	0	0	0	0	0	0	0	166.234	0	0	0	0	0	0	0	0	0	0	0	0	0	0	0	0	0	0	0	0	20	-1019.53	1440.27	738.825	571.474	-196.462	937.462	-356.075	771.594	-432.447
0	0	0	0	0	0	0	0	0	0	0	0	0	0	0	0	0	0	0	0	102.332	0	0	0	0	0	0	0	0	0	0	0	0	0	0	0	0	0	0	0	21	261.241	-36.5264	450.002	217.687	-215.852	-48.0562	-229.644	795.811	-171.603
0	0	0	0	0	0	0	0	0	0	0	0	0	0	0	0	0	0	0	0	0	146.578	0	0	0	0	0	0	0	0	0	0	0	0	0	0	0	0	0	0	22	2.04775	-251.452	269.182	-355.745	379.972	-76.8909	-450.497	835.786	-647.896
0	0	0	0	0	0	0	0	0	0	0	0	0	0	0	0	0	0	0	0	0	0	89.756	0	0	0	0	0	0	0	0	0	0	0	0	0	0	0	0	0	23	-732.206	-219.19	-538.782	21.3028	-259.656	-175.615	680.789	120.3	15.5276
0	0	0	0	0	0	0	0	0	0	0	0	0	0	0	0	0	0	0	0	0	0	0	81.8374	0	0	0	0	0	0	0	0	0	0	0	0	0	0	0	0	24	31.8762	-81.6906	221.536	-259.003	-238.974	58.1822	625.961	-647.178	273.117
0	0	0	0	0	0	0	0	0	0	0	0	0	0	0	0	0	0	0	0	0	0	0	0	45.9143	0	0	0	0	0	0	0	0	0	0	0	0	0	0	0	25	48.2688	535.29	33.9159	-938.752	-165.791	-157.862	302.707	-284.647	-461.296
0	0	0	0	0	0	0	0	0	0	0	0	0	0	0	0	0	0	0	0	0	0	0	0	0	82.4377	0	0	0	0	0	0	0	0	0	0	0	0	0	0	26	-138.065	-73.4212	-521.308	-200.106	270.081	90.3481	-118.275	-222.526	118.668
0	0	0	0	0	0	0	0	0	0	0	0	0	0	0	0	0	0	0	0	0	0	0	0	0	0	6.39107	0	0	0	0	0	0	0	0	0	0	0	0	0	27	-130.996	-433.676	330.015	755.516	-338.639	-13.3773	174.799	-12.9998	418.529
0	0	0	0	0	0	0	0	0	0	0	0	0	0	0	0	0	0	0	0	0	0	0	0	0	0	0	101.679	0	0	0	0	0	0	0	0	0	0	0	0	28	-251.742	-212.68	-443.177	-184.027	-360.038	-166.874	-85.6837	-354.015	441.473
0	0	0	0	0	0	0	0	0	0	0	0	0	0	0	0	0	0	0	0	0	0	0	0	0	0	0	0	71.7681	0	0	0	0	0	0	0	0	0	0	0	29	30.9017	180.15	-141.846	-412.363	62.3777	-81.0262	-220.553	137.897	-274.127
0	0	0	0	0	0	0	0	0	0	0	0	0	0	0	0	0	0	0	0	0	0	0	0	0	0	0	0	0	210.07	0	0	0	0	0	0	0	0	0	0	30	147.406	415.196	-589.379	-930.017	325.486	-107.038	-945.891	545.087	-599.41
0	0	0	0	0	0	0	0	0	0	0	0	0	0	0	0	0	0	0	0	0	0	0	0	0	0	0	0	0	0	215.269	0	0	0	0	0	0	0	0	0	31	-106.616	228.788	-191.476	-546.696	-39.4811	17.3699	760.942	-901.638	81.3092
0.00390625	0	0	0	0	0	0	0	0	0	0	0	0	0	0	0	0	0	0	0	0	0	0	0	0	0	0	0	0	0	0	0	0	0	0	0	0	0	0	0	32-dimensional	3302.91	117.397	-265.96	322.589	-321.025	-50.4137	-1349.97	851.753	-57.0401
0	142.195	0	0	0	0	0	0	0	0	0	0	0	0	0	0	0	0	0	0	0	0	0	0	0	0	0	0	0	0	0	0	0	0	0	0	0	0	0	0	2	117.397	8688.93	-2387.03	1615.06	517.304	-793.901	948.144	826.682	1554.17
0	0	216.654	0	0	0	0	0	0	0	0	0	0	0	0	0	0	0	0	0	0	0	0	0	0	0	0	0	0	0	0	0	0	0	0	0	0	0	0	0	3	-265.96	-2387.03	12509.3	-405.811	1303.07	-8.17161	-658.357	-252.285	-1213.94
0	0	0	104.467	0	0	0	0	0	0	0	0	0	0	0	0	0	0	0	0	0	0	0	0	0	0	0	0	0	0	0	0	0	0	0	0	0	0	0	0	4	322.589	1615.06	-405.811	5330.01	-86.1379	50.7818	-523.09	-231.559	-276.95
0	0	0	0	118.279	0	0	0	0	0	0	0	0	0	0	0	0	0	0	0	0	0	0	0	0	0	0	0	0	0	0	0	0	0	0	0	0	0	0	0	5	-321.025	517.304	1303.07	-86.1379	6564.15	1687.77	-1964.74	1302.43	-852.911
0	0	0	0	0	211.535	0	0	0	0	0	0	0	0	0	0	0	0	0	0	0	0	0	0	0	0	0	0	0	0	0	0	0	0	0	0	0	0	0	0	6	-50.4137	-793.901	-8.17161	50.7818	1687.77	7152.31	-738.69	1727.85	-904.027
0	0	0	0	0	0	253.748	0	0	0	0	0	0	0	0	0	0	0	0	0	0	0	0	0	0	0	0	0	0	0	0	0	0	0	0	0	0	0	0	0	7	-1349.97	948.144	-658.357	-523.09	-1964.74	-738.69	9901.5	1091.31	-680.694
0	0	0	0	0	0	0	134.132	0	0	0	0	0	0	0	0	0	0	0	0	0	0	0	0	0	0	0	0	0	0	0	0	0	0	0	0	0	0	0	0	8	851.753	826.682	-252.285	-231.559	1302.43	1727.85	1091.31	7131.05	559.953
0	0	0	0	0	0	0	0	236.912	0	0	0	0	0	0	0	0	0	0	0	0	0	0	0	0	0	0	0	0	0	0	0	0	0	0	0	0	0	0	0	9	-57.0401	1554.17	-1213.94	-276.95	-852.911	-904.027	-680.694	559.953	4985.14
0	0	0	0	0	0	0	0	0	189.191	0	0	0	0	0	0	0	0	0	0	0	0	0	0	0	0	0	0	0	0	0	0	0	0	0	0	0	0	0	0	10	-635.502	1817.31	-987.078	1614.59	-354.654	1397.82	-25.1698	-363.583	943.026
0	0	0	0	0	0	0	0	0	0	145.264	0	0	0	0	0	0	0	0	0	0	0	0	0	0	0	0	0	0	0	0	0	0	0	0	0	0	0	0	0	11	1333.53	-1966.74	249.061	-1376.36	-471.351	-766.872	812.908	-379.83	-996.934
0	0	0	0	0	0	0	0	0	0	0	248.007	0	0	0	0	0	0	0	0	0	0	0	0	0	0	0	0	0	0	0	0	0	0	0	0	0	0	0	0	12	210.753	-1638.41	-453.202	365.122	-1034.46	-139.965	-369.377	-1318.08	128.31
0	0	0	0	0	0	0	0	0	0	0	0	211.073	0	0	0	0	0	0	0	0	0	0	0	0	0	0	0	0	0	0	0	0	0	0	0	0	0	0	0	13	-193.061	-345.423	-249.926	731.799	963.541	934.137	643.279	1381.79	-1082.42
0	0	0	0	0	0	0	0	0	0	0	0	0	245.66	0	0	0	0	0	0	0	0	0	0	0	0	0	0	0	0	0	0	0	0	0	0	0	0	0	0	14	467.947	788.609	-2671.46	-1867.97	220.636	1059.8	840.161	963.861	238.072
0	0	0	0	0	0	0	0	0	0	0	0	0	0	165.466	0	0	0	0	0	0	0	0	0	0	0	0	0	0	0	0	0	0	0	0	0	0	0	0	0	15	5.71241	297.205	1789.22	696.162	294.949	1146.27	601.557	1076.99	-191.774
0	0	0	0	0	0	0	0	0	0	0	0	0	0	0	97.1732	0	0	0	0	0	0	0	0	0	0	0	0	0	0	0	0	0	0	0	0	0	0	0	0	16	-87.4269	-1053.95	526.656	54.7514	53.6206	-554.503	378.472	-1102.02	-782.006
0	0	0	0	0	0	0	0	0	0	0	0	0	0	0	0	122.005	0	0	0	0	0	0	0	0	0	0	0	0	0	0	0	0	0	0	0	0	0	0	0	17	-415.609	-296.498	226.33	288.847	-1035.49	208.933	-248.322	-220.051	-694.611
0	0	0	0	0	0	0	0	0	0	0	0	0	0	0	0	0	233.444	0	0	0	0	0	0	0	0	0	0	0	0	0	0	0	0	0	0	0	0	0	0	18	-820.111	-917.055	796.02	-1343.08	684.804	-1278.47	-370.901	-1161.77	180.096
0	0	0	0	0	0	0	0	0	0	0	0	0	0	0	0	0	0	3.80644	0	0	0	0	0	0	0	0	0	0	0	0	0	0	0	0	0	0	0	0	0	19	221.705	-305.48	351.98	-155.472	-433.181	-138.76	-382.156	19.4297	138.904
0	0	0	0	0	0	0	0	0	0	0	0	0	0	0	0	0	0	0	40.1169	0	0	0	0	0	0	0	0	0	0	0	0	0	0	0	0	0	0	0	0	20	-239.232	662.141	-450.966	-275.595	260.872	-72.6666	378.456	432.478	415.071
0	0	0	0	0	0	0	0	0	0	0	0	0	0	0	0	0	0	0	0	120.723	0	0	0	0	0	0	0	0	0	0	0	0	0	0	0	0	0	0	0	21	-122.363	-529.291	402.013	-538.907	501.335	361.661	237.175	836.9	-181.334
0	0	0	0	0	0	0	0	0	0	0	0	0	0	0	0	0	0	0	0	0	139.008	0	0	0	0	0	0	0	0	0	0	0	0	0	0	0	0	0	0	22	-162.326	-87.8885	773.435	278.057	-176.17	-618.888	-92.1571	-1.82527	-213.611
0	0	0	0	0	0	0	0	0	0	0	0	0	0	0	0	0	0	0	0	0	0	15.2846	0	0	0	0	0	0	0	0	0	0	0	0	0	0	0	0	0	23	-65.7874	-222.879	866.138	-110.773	-124.853	-249.332	117.285	-209.9	154.282
0	0	0	0	0	0	0	0	0	0	0	0	0	0	0	0	0	0	0	0	0	0	0	168.457	0	0	0	0	0	0	0	0	0	0	0	0	0	0	0	0	24	853.952	-1505.82	1354.66	620.796	-472.98	-420.231	-123.953	-914.908	-783.908
0	0	0	0	0	0	0	0	0	0	0	0	0	0	0	0	0	0	0	0	0	0	0	0	227.747	0	0	0	0	0	0	0	0	0	0	0	0	0	0	0	25	-628.551	773.315	1016.65	865.932	-6.5371	-664.108	115.172	-1155.93	-323.775
0	0	0	0	0	0	0	0	0	0	0	0	0	0	0	0	0	0	0	0	0	0	0	0	0	28.0694	0	0	0	0	0	0	0	0	0	0	0	0	0	0	26	-253.25	660.831	110.079	-119.623	347.357	522.318	147.131	500.716	147.618
0	0	0	0	0	0	0	0	0	0	0	0	0	0	0	0	0	0	0	0	0	0	0	0	0	0	112.072	0	0	0	0	0	0	0	0	0	0	0	0	0	27	-407.798	253.026	766.934	-349.18	250.714	271.429	192.057	136.19	346.507
0	0	0	0	0	0	0	0	0	0	0	0	0	0	0	0	0	0	0	0	0	0	0	0	0	0	0	71.7417	0	0	0	0	0	0	0	0	0	0	0	0	28	-16.9541	-749.805	1183.36	-484.836	-225.064	-405.468	263.193	-248.975	527.897
0	0	0	0	0	0	0	0	0	0	0	0	0	0	0	0	0	0	0	0	0	0	0	0	0	0	0	0	252.223	0	0	0	0	0	0	0	0	0	0	0	29	-293.144	-274.49	551.915	-164.653	-113.972	-324.688	51.6225	-138.805	161.049
0	0	0	0	0	0	0	0	0	0	0	0	0	0	0	0	0	0	0	0	0	0	0	0	0	0	0	0	0	155.844	0	0	0	0	0	0	0	0	0	0	30	107.224	-202.503	-98.3083	87.6013	149.44	-152.198	388.444	282.541	-219.068
0	0	0	0	0	0	0	0	0	0	0	0	0	0	0	0	0	0	0	0	0	0	0	0	0	0	0	0	0	0	64.9627	0	0	0	0	0	0	0	0	0	31	-157.153	177.243	129.998	-51.6635	20.3655	-0.183797	-11.6356	76.1222	84.3227
0	0	0	0	0	0	0	0	0	0	0	0	0	0	0	0	0	0	0	0	0	0	0	0	0	0	0	0	0	0	0	256	0	0	0	0	0	0	0	0	32	-418.41	404.192	604.471	-314.753	15.9901	229.867	39.0594	239.272	326.452
0.00328475	0	0	0	0	0	0	0	0	0	0	0	0	0	0	0	0	0	0	0	0	0	0	0	0	0	0	0	0	0	0	0	0	0	0	0	0	0	0	0	33-dimensional	4555.73	1408.36	1069.19	1881.91	-1505.87	1171.75	-1086.87	-688.348	-126.364
0	40.3757	0	0	0	0	0	0	0	0	0	0	0	0	0	0	0	0	0	0	0	0	0	0	0	0	0	0	0	0	0	0	0	0	0	0	0	0	0	0	2	1408.36	6782.56	707.693	-494.009	660.233	-1399.27	-99.3987	-1370.99	-2042.71
0	0	165.921	0	0	0	0	0	0	0	0	0	0	0	0	0	0	0	0	0	0	0	0	0	0	0	0	0	0	0	0	0	0	0	0	0	0	0	0	0	3	1069.19	707.693	10205.2	990.788	-2372.47	2071.85	-235.078	-625.766	-865.795
0	0	0	252.015	0	0	0	0	0	0	0	0	0	0	0	0	0	0	0	0	0	0	0	0	0	0	0	0	0	0	0	0	0	0	0	0	0	0	0	0	4	1881.91	-494.009	990.788	15036.9	-2823.41	542.587	1.40485	-1199.46	1421.46
0	0	0	0	254.816	0	0	0	0	0	0	0	0	0	0	0	0	0	0	0	0	0	0	0	0	0	0	0	0	0	0	0	0	0	0	0	0	0	0	0	5	-1505.87	660.233	-2372.47	-2823.41	11071.7	268.844	1122.92	1501.66	2487.05
0	0	0	0	0	253.703	0	0	0	0	0	0	0	0	0	0	0	0	0	0	0	0	0	0	0	0	0	0	0	0	0	0	0	0	0	0	0	0	0	0	6	1171.75	-1399.27	2071.85	542.587	268.844	10161.8	127.039	22.9228	-3504.15
0	0	0	0	0	0	62.0211	0	0	0	0	0	0	0	0	0	0	0	0	0	0	0	0	0	0	0	0	0	0	0	0	0	0	0	0	0	0	0	0	0	7	-1086.87	-99.3987	-235.078	1.40485	1122.92	127.039	4325.42	2007.15	481.915
0	0	0	0	0	0	0	165.742	0	0	0	0	0	0	0	0	0	0	0	0	0	0	0	0	0	0	0	0	0	0	0	0	0	0	0	0	0	0	0	0	8	-688.348	-1370.99	-625.766	-1199.46	1501.66	22.9228	2007.15	7968.75	-1017.05
0	0	0	0	0	0	0	0	266.365	0	0	0	0	0	0	0	0	0	0	0	0	0	0	0	0	0	0	0	0	0	0	0	0	0	0	0	0	0	0	0	9	-126.364	-2042.71	-865.795	1421.46	2487.05	-3504.15	481.915	-1017.05	9887.6
0	0	0	0	0	0	0	0	0	36.8398	0	0	0	0	0	0	0	0	0	0	0	0	0	0	0	0	0	0	0	0	0	0	0	0	0	0	0	0	0	0	10	911.102	1263.81	-2429.4	620.708	-14.6507	180.353	272.624	-293.403	85.3045
0	0	0	0	0	0	0	0	0	0	260.705	0	0	0	0	0	0	0	0	0	0	0	0	0	0	0	0	0	0	0	0	0	0	0	0	0	0	0	0	0	11	1934.48	672.626	-1823.1	2797.46	-560.036	-572.359	-301.05	-1003.21	473.435
0	0	0	0	0	0	0	0	0	0	0	273.925	0	0	0	0	0	0	0	0	0	0	0	0	0	0	0	0	0	0	0	0	0	0	0	0	0	0	0	0	12	3133.21	3085.05	-699.188	418.207	1029.86	653.87	-1367.05	-1162.96	849.275
0	0	0	0	0	0	0	0	0	0	0	0	66.3288	0	0	0	0	0	0	0	0	0	0	0	0	0	0	0	0	0	0	0	0	0	0	0	0	0	0	0	13	209.43	116.088	-370.933	-1870.12	631.562	1102.66	-363.142	-243.885	-1297.24
0	0	0	0	0	0	0	0	0	0	0	0	0	23.4383	0	0	0	0	0	0	0	0	0	0	0	0	0	0	0	0	0	0	0	0	0	0	0	0	0	0	14	132.068	59.4378	1067.15	841.979	-552.967	-692.786	-357.759	-310.942	1371.25
0	0	0	0	0	0	0	0	0	0	0	0	0	0	144.37	0	0	0	0	0	0	0	0	0	0	0	0	0	0	0	0	0	0	0	0	0	0	0	0	0	15	-740.291	42.1568	-1318.5	-2091.09	2486.88	996.305	701.691	2153.91	-769.513
0	0	0	0	0	0	0	0	0	0	0	0	0	0	0	254.214	0	0	0	0	0	0	0	0	0	0	0	0	0	0	0	0	0	0	0	0	0	0	0	0	16	874.337	-1440.92	1556.11	534.941	-832.711	1997.19	91.0025	431.412	-319.975
0	0	0	0	0	0	0	0	0	0	0	0	0	0	0	0	142.903	0	0	0	0	0	0	0	0	0	0	0	0	0	0	0	0	0	0	0	0	0	0	0	17	-1177.59	381.284	-222.208	-346.302	-209.127	-599.722	-161.574	346.71	249.516
0	0	0	0	0	0	0	0	0	0	0	0	0	0	0	0	0	125.969	0	0	0	0	0	0	0	0	0	0	0	0	0	0	0	0	0	0	0	0	0	0	18	173.055	999.435	1114.74	-654.287	-337.949	725.41	-400.138	-1338.22	-239.919
0	0	0	0	0	0	0	0	0	0	0	0	0	0	0	0	0	0	153.056	0	0	0	0	0	0	0	0	0	0	0	0	0	0	0	0	0	0	0	0	0	19	114.846	1615.15	1175.14	226.131	-1499.39	216.632	-969.617	-524.041	-773.569
0	0	0	0	0	0	0	0	0	0	0	0	0	0	0	0	0	0	0	38.1914	0	0	0	0	0	0	0	0	0	0	0	0	0	0	0	0	0	0	0	0	20	527.97	-948.816	7.47698	-1320.2	-1302.56	690.58	-174.415	-276.239	-770.399
0	0	0	0	0	0	0	0	0	0	0	0	0	0	0	0	0	0	0	0	40.2754	0	0	0	0	0	0	0	0	0	0	0	0	0	0	0	0	0	0	0	21	-667.829	-667.415	137.573	-1241.62	-266.591	418.03	-609.166	-506.976	-557.301
0	0	0	0	0	0	0	0	0	0	0	0	0	0	0	0	0	0	0	0	0	265.005	0	0	0	0	0	0	0	0	0	0	0	0	0	0	0	0	0	0	22	648.738	904.773	884.847	-319.376	954.135	-789.134	186.396	-69.3918	1348.81
0	0	0	0	0	0	0	0	0	0	0	0	0	0	0	0	0	0	0	0	0	0	183.562	0	0	0	0	0	0	0	0	0	0	0	0	0	0	0	0	0	23	-183.72	-266.476	-973.409	-224.583	840.248	478.433	-105.489	1531.46	-578.975
0	0	0	0	0	0	0	0	0	0	0	0	0	0	0	0	0	0	0	0	0	0	0	80.7701	0	0	0	0	0	0	0	0	0	0	0	0	0	0	0	0	24	-12.6318	-279.013	-114.773	-1640.88	739.67	211.973	-474.865	278.271	-103.319
0	0	0	0	0	0	0	0	0	0	0	0	0	0	0	0	0	0	0	0	0	0	0	0	263.278	0	0	0	0	0	0	0	0	0	0	0	0	0	0	0	25	172.568	1438.7	661.74	626.738	878.774	849.331	-272.063	-631.839	-1072.07
0	0	0	0	0	0	0	0	0	0	0	0	0	0	0	0	0	0	0	0	0	0	0	0	0	17.6938	0	0	0	0	0	0	0	0	0	0	0	0	0	0	26	1503.58	541.826	-768.688	312.17	-615.202	1166.37	-92.0568	-880.01	-165.624
0	0	0	0	0	0	0	0	0	0	0	0	0	0	0	0	0	0	0	0	0	0	0	0	0	0	139.359	0	0	0	0	0	0	0	0	0	0	0	0	0	27	-470.363	-460.629	-596.343	596.146	6.92042	-501.65	355.458	670.922	-156.373
0	0	0	0	0	0	0	0	0	0	0	0	0	0	0	0	0	0	0	0	0	0	0	0	0	0	0	219.868	0	0	0	0	0	0	0	0	0	0	0	0	28	1218.73	458.211	-139.219	142.959	394.971	269.637	53.8178	-909.03	617.131
0	0	0	0	0	0	0	0	0	0	0	0	0	0	0	0	0	0	0	0	0	0	0	0	0	0	0	0	103.206	0	0	0	0	0	0	0	0	0	0	0	29	413.258	-160.009	-778.585	-256.309	-17.2555	286.589	-612.564	273.113	-752.342
0	0	0	0	0	0	0	0	0	0	0	0	0	0	0	0	0	0	0	0	0	0	0	0	0	0	0	0	0	122.148	0	0	0	0	0	0	0	0	0	0	30	-273.31	-872.802	-210.242	-2511.64	368.789	1608.68	-67.1867	696.996	-1684.61
0	0	0	0	0	0	0	0	0	0	0	0	0	0	0	0	0	0	0	0	0	0	0	0	0	0	0	0	0	0	160.434	0	0	0	0	0	0	0	0	0	31	-794.528	41.7892	389.261	-38.9049	448.909	-410.146	203.429	-65.112	390.271
0	0	0	0	0	0	0	0	0	0	0	0	0	0	0	0	0	0	0	0	0	0	0	0	0	0	0	0	0	0	0	272.239	0	0	0	0	0	0	0	0	32	-192.643	-295.102	-15.3699	-1032.94	264.674	387.112	-295.818	294.136	-562.954
0	0	0	0	0	0	0	0	0	0	0	0	0	0	0	0	0	0	0	0	0	0	0	0	0	0	0	0	0	0	0	0	304.437	0	0	0	0	0	0	0	33	459.303	24.8851	88.3882	-239.644	-5.14778	214.263	-80.0992	22.4462	-227.407
0.00276214	0	0	0	0	0	0	0	0	0	0	0	0	0	0	0	0	0	0	0	0	0	0	0	0	0	0	0	0	0	0	0	0	0	0	0	0	0	0	0	34-dimensional	5051.2	2109.88	-180.856	-1109.76	757.823	2118.7	-42.2402	915.384	-695.328
0	281.797	0	0	0	0	0	0	0	0	0	0	0	0	0	0	0	0	0	0	0	0	0	0	0	0	0	0	0	0	0	0	0	0	0	0	0	0	0	0	2	2109.88	18314.4	424.063	2867.54	106.007	-4767.82	-130.013	-663.264	-1375.15
0	0	25.1163	0	0	0	0	0	0	0	0	0	0	0	0	0	0	0	0	0	0	0	0	0	0	0	0	0	0	0	0	0	0	0	0	0	0	0	0	0	3	-180.856	424.063	4580.4	1022.77	-287.905	223.802	1302.08	-623.349	-1479.53
0	0	0	100.933	0	0	0	0	0	0	0	0	0	0	0	0	0	0	0	0	0	0	0	0	0	0	0	0	0	0	0	0	0	0	0	0	0	0	0	0	4	-1109.76	2867.54	1022.77	13558.7	407.912	-3638.83	420.788	-3165.42	-779.971
0	0	0	0	137.348	0	0	0	0	0	0	0	0	0	0	0	0	0	0	0	0	0	0	0	0	0	0	0	0	0	0	0	0	0	0	0	0	0	0	0	5	757.823	106.007	-287.905	407.912	10734.3	823.796	1273.06	-815.518	-1485.74
0	0	0	0	0	313.045	0	0	0	0	0	0	0	0	0	0	0	0	0	0	0	0	0	0	0	0	0	0	0	0	0	0	0	0	0	0	0	0	0	0	6	2118.7	-4767.82	223.802	-3638.83	823.796	15599.3	-1098.71	-1638.75	-502.72
0	0	0	0	0	0	152.043	0	0	0	0	0	0	0	0	0	0	0	0	0	0	0	0	0	0	0	0	0	0	0	0	0	0	0	0	0	0	0	0	0	7	-42.2402	-130.013	1302.08	420.788	1273.06	-1098.71	7457.07	460.834	-169.079
0	0	0	0	0	0	0	86.847	0	0	0	0	0	0	0	0	0	0	0	0	0	0	0	0	0	0	0	0	0	0	0	0	0	0	0	0	0	0	0	0	8	915.384	-663.264	-623.349	-3165.42	-815.518	-1638.75	460.834	7214.32	77.6631
0	0	0	0	0	0	0	0	216.375	0	0	0	0	0	0	0	0	0	0	0	0	0	0	0	0	0	0	0	0	0	0	0	0	0	0	0	0	0	0	0	9	-695.328	-1375.15	-1479.53	-779.971	-1485.74	-502.72	-169.079	77.6631	8011.63
0	0	0	0	0	0	0	0	0	173.564	0	0	0	0	0	0	0	0	0	0	0	0	0	0	0	0	0	0	0	0	0	0	0	0	0	0	0	0	0	0	10	382.816	1805.34	-2014.57	2003.48	-3440.39	-2126.81	221.318	-1147.56	714.065
0	0	0	0	0	0	0	0	0	0	325.309	0	0	0	0	0	0	0	0	0	0	0	0	0	0	0	0	0	0	0	0	0	0	0	0	0	0	0	0	0	11	1463.83	-2588.03	-1257.89	-3031.64	2205.25	1768.59	317.439	1364.12	1892.86
0	0	0	0	0	0	0	0	0	0	0	338.401	0	0	0	0	0	0	0	0	0	0	0	0	0	0	0	0	0	0	0	0	0	0	0	0	0	0	0	0	12	969.353	-687.264	1907	-2065.39	-82.1303	3153.16	1030.41	161.706	-458.452
0	0	0	0	0	0	0	0	0	0	0	0	296.107	0	0	0	0	0	0	0	0	0	0	0	0	0	0	0	0	0	0	0	0	0	0	0	0	0	0	0	13	479.335	265.724	-2187.39	-186.099	-2044	26.5334	282.573	1216.46	830.695
0	0	0	0	0	0	0	0	0	0	0	0	0	256.653	0	0	0	0	0	0	0	0	0	0	0	0	0	0	0	0	0	0	0	0	0	0	0	0	0	0	14	-794.023	552.313	-906.133	1622.84	-256.936	-939.384	712.412	-667.744	-853.533
0	0	0	0	0	0	0	0	0	0	0	0	0	0	269.075	0	0	0	0	0	0	0	0	0	0	0	0	0	0	0	0	0	0	0	0	0	0	0	0	0	15	602.991	-3102.63	-692.409	-4010.95	874.311	4218.22	-1611.93	-485.163	1565.67
0	0	0	0	0	0	0	0	0	0	0	0	0	0	0	325.73	0	0	0	0	0	0	0	0	0	0	0	0	0	0	0	0	0	0	0	0	0	0	0	0	16	1056.2	-1346.66	-199.463	-576.045	-375.218	3548.17	-745.698	-1049.72	-1773.58
0	0	0	0	0	0	0	0	0	0	0	0	0	0	0	0	23.6219	0	0	0	0	0	0	0	0	0	0	0	0	0	0	0	0	0	0	0	0	0	0	0	17	208.467	-286.73	-758.243	625.807	939.509	126.797	-118.897	-136.8	994.672
0	0	0	0	0	0	0	0	0	0	0	0	0	0	0	0	0	121.615	0	0	0	0	0	0	0	0	0	0	0	0	0	0	0	0	0	0	0	0	0	0	18	679.76	-467.046	-139.392	-1148.94	-559.304	-346.129	211.549	572.304	1479.95
0	0	0	0	0	0	0	0	0	0	0	0	0	0	0	0	0	0	1.57221	0	0	0	0	0	0	0	0	0	0	0	0	0	0	0	0	0	0	0	0	0	19	274.997	367.155	-42.3988	791.336	-744.538	92.5842	-66.588	301.551	-612.951
0	0	0	0	0	0	0	0	0	0	0	0	0	0	0	0	0	0	0	299.803	0	0	0	0	0	0	0	0	0	0	0	0	0	0	0	0	0	0	0	0	20	-1393.9	79.1727	-250.296	774.005	3188.8	1659.17	120.353	-984.795	-78.6748
0	0	0	0	0	0	0	0	0	0	0	0	0	0	0	0	0	0	0	0	183.713	0	0	0	0	0	0	0	0	0	0	0	0	0	0	0	0	0	0	0	21	1690.24	-803.682	792.556	-2147.23	-1537.36	401.973	555.686	2576	-566.821
0	0	0	0	0	0	0	0	0	0	0	0	0	0	0	0	0	0	0	0	0	132.567	0	0	0	0	0	0	0	0	0	0	0	0	0	0	0	0	0	0	22	147.245	-359.699	315.297	-1619.94	-43.7818	-2020.04	-315.173	584.208	90.9767
0	0	0	0	0	0	0	0	0	0	0	0	0	0	0	0	0	0	0	0	0	0	82.0545	0	0	0	0	0	0	0	0	0	0	0	0	0	0	0	0	0	23	278.343	-756.719	425.931	-2071.41	355.87	-210.86	368.199	629.418	-295.305
0	0	0	0	0	0	0	0	0	0	0	0	0	0	0	0	0	0	0	0	0	0	0	193.631	0	0	0	0	0	0	0	0	0	0	0	0	0	0	0	0	24	-1705.01	1231.5	317.837	1473.21	-399.231	-291.726	-903.332	-71.7762	-463.911
0	0	0	0	0	0	0	0	0	0	0	0	0	0	0	0	0	0	0	0	0	0	0	0	104.807	0	0	0	0	0	0	0	0	0	0	0	0	0	0	0	25	295.927	-71.8426	6.54972	1584.63	-243.073	1177.99	133.495	-303.973	392.707
0	0	0	0	0	0	0	0	0	0	0	0	0	0	0	0	0	0	0	0	0	0	0	0	0	24.7555	0	0	0	0	0	0	0	0	0	0	0	0	0	0	26	-313.539	155.765	-106.722	510.706	-75.2425	39.405	-342.522	-384.868	-767.156
0	0	0	0	0	0	0	0	0	0	0	0	0	0	0	0	0	0	0	0	0	0	0	0	0	0	30.7652	0	0	0	0	0	0	0	0	0	0	0	0	0	27	1219.05	-1298.16	-337.823	-1975.31	426.623	-487.784	263.795	1621.87	1153.62
0	0	0	0	0	0	0	0	0	0	0	0	0	0	0	0	0	0	0	0	0	0	0	0	0	0	0	24.7441	0	0	0	0	0	0	0	0	0	0	0	0	28	-937.473	824.165	141.467	1215.32	178.721	-1260.07	-699.092	-752.264	-993.613
0	0	0	0	0	0	0	0	0	0	0	0	0	0	0	0	0	0	0	0	0	0	0	0	0	0	0	0	148.371	0	0	0	0	0	0	0	0	0	0	0	29	713.364	-395.307	-475.157	-613.3	376.482	-1354.06	-152.605	467.612	-400.267
0	0	0	0	0	0	0	0	0	0	0	0	0	0	0	0	0	0	0	0	0	0	0	0	0	0	0	0	0	44.6713	0	0	0	0	0	0	0	0	0	0	30	413.476	-300.024	-220.498	-1124.47	32.939	-24.2459	519.319	376.7	161.176
0	0	0	0	0	0	0	0	0	0	0	0	0	0	0	0	0	0	0	0	0	0	0	0	0	0	0	0	0	0	160.391	0	0	0	0	0	0	0	0	0	31	173.236	156.687	285.172	475.416	471.595	-1845.15	-468.31	368.076	599.707
0	0	0	0	0	0	0	0	0	0	0	0	0	0	0	0	0	0	0	0	0	0	0	0	0	0	0	0	0	0	0	325.451	0	0	0	0	0	0	0	0	32	-11.706	-264.901	61.8814	-863.959	156.508	-275.316	120.77	416.276	189.396
0	0	0	0	0	0	0	0	0	0	0	0	0	0	0	0	0	0	0	0	0	0	0	0	0	0	0	0	0	0	0	0	128.033	0	0	0	0	0	0	0	33	-116.816	42.3856	99.9543	-291.799	169.597	-557.993	46.3763	74.0029	9.63322
0	0	0	0	0	0	0	0	0	0	0	0	0	0	0	0	0	0	0	0	0	0	0	0	0	0	0	0	0	0	0	0	0	362.039	0	0	0	0	0	0	34	76.401	-18.9182	-32.2291	115.419	-45.4834	168.736	7.23574	-28.0885	32.3224
0.00232267	0	0	0	0	0	0	0	0	0	0	0	0	0	0	0	0	0	0	0	0	0	0	0	0	0	0	0	0	0	0	0	0	0	0	0	0	0	0	0	35-dimensional	7499.1	3704.81	1192.97	3458.8	-997.31	-333.267	-931.625	-3071.45	2510.05
0	51.7434	0	0	0	0	0	0	0	0	0	0	0	0	0	0	0	0	0	0	0	0	0	0	0	0	0	0	0	0	0	0	0	0	0	0	0	0	0	0	2	3704.81	10800.7	496.99	742.081	1385.83	1098.39	-1520.82	-1741.8	2405.29
0	0	245.025	0	0	0	0	0	0	0	0	0	0	0	0	0	0	0	0	0	0	0	0	0	0	0	0	0	0	0	0	0	0	0	0	0	0	0	0	0	3	1192.97	496.99	15516.6	-4397.14	245.301	1211	884.407	2185.07	-1445.3
0	0	0	376.736	0	0	0	0	0	0	0	0	0	0	0	0	0	0	0	0	0	0	0	0	0	0	0	0	0	0	0	0	0	0	0	0	0	0	0	0	4	3458.8	742.081	-4397.14	20043.7	-2617.36	-320.528	-1211.52	-2273.83	-125.054
0	0	0	0	150.077	0	0	0	0	0	0	0	0	0	0	0	0	0	0	0	0	0	0	0	0	0	0	0	0	0	0	0	0	0	0	0	0	0	0	0	5	-997.31	1385.83	245.301	-2617.36	9316.51	-883.944	-1563.97	-690.72	1055.62
0	0	0	0	0	18.0509	0	0	0	0	0	0	0	0	0	0	0	0	0	0	0	0	0	0	0	0	0	0	0	0	0	0	0	0	0	0	0	0	0	0	6	-333.267	1098.39	1211	-320.528	-883.944	8020.03	1478.27	704.22	-253.483
0	0	0	0	0	0	61.2848	0	0	0	0	0	0	0	0	0	0	0	0	0	0	0	0	0	0	0	0	0	0	0	0	0	0	0	0	0	0	0	0	0	7	-931.625	-1520.82	884.407	-1211.52	-1563.97	1478.27	9284.56	2606.01	-1879.79
0	0	0	0	0	0	0	32.9783	0	0	0	0	0	0	0	0	0	0	0	0	0	0	0	0	0	0	0	0	0	0	0	0	0	0	0	0	0	0	0	0	8	-3071.45	-1741.8	2185.07	-2273.83	-690.72	704.22	2606.01	7764.71	-3971.76
0	0	0	0	0	0	0	0	318.826	0	0	0	0	0	0	0	0	0	0	0	0	0	0	0	0	0	0	0	0	0	0	0	0	0	0	0	0	0	0	0	9	2510.05	2405.29	-1445.3	-125.054	1055.62	-253.483	-1879.79	-3971.76	14128
0	0	0	0	0	0	0	0	0	196.553	0	0	0	0	0	0	0	0	0	0	0	0	0	0	0	0	0	0	0	0	0	0	0	0	0	0	0	0	0	0	10	-162.655	-2326.36	-744.148	2511.84	-83.3773	-1690.4	1644.33	-1647.26	3664.21
0	0	0	0	0	0	0	0	0	0	287.708	0	0	0	0	0	0	0	0	0	0	0	0	0	0	0	0	0	0	0	0	0	0	0	0	0	0	0	0	0	11	-2124.85	-1282.85	-1269.4	-1379.78	-1114.2	2700.06	2110.77	816.024	1495.58
0	0	0	0	0	0	0	0	0	0	0	301.053	0	0	0	0	0	0	0	0	0	0	0	0	0	0	0	0	0	0	0	0	0	0	0	0	0	0	0	0	12	-443.367	671.326	-1140.19	-174.475	1426.94	429.149	475.544	-1873.52	5080.71
0	0	0	0	0	0	0	0	0	0	0	0	245.993	0	0	0	0	0	0	0	0	0	0	0	0	0	0	0	0	0	0	0	0	0	0	0	0	0	0	0	13	-2240.54	-2302.81	1910.35	-2170.91	-575.673	-1379.22	1935.36	5059.27	-683.01
0	0	0	0	0	0	0	0	0	0	0	0	0	270.678	0	0	0	0	0	0	0	0	0	0	0	0	0	0	0	0	0	0	0	0	0	0	0	0	0	0	14	1221.59	145.415	472.132	-1959.88	713.462	1906.91	1606.02	-296.946	-2037.9
0	0	0	0	0	0	0	0	0	0	0	0	0	0	377.912	0	0	0	0	0	0	0	0	0	0	0	0	0	0	0	0	0	0	0	0	0	0	0	0	0	15	1470.05	-1606.63	979.895	-1907.31	-1420.89	-1977.74	4465.97	1607.84	-1971.79
0	0	0	0	0	0	0	0	0	0	0	0	0	0	0	285.169	0	0	0	0	0	0	0	0	0	0	0	0	0	0	0	0	0	0	0	0	0	0	0	0	16	-328.647	400.317	-3103.5	1179.95	289.966	-683.907	2187.28	-1548.89	-484.183
0	0	0	0	0	0	0	0	0	0	0	0	0	0	0	0	376.9	0	0	0	0	0	0	0	0	0	0	0	0	0	0	0	0	0	0	0	0	0	0	0	17	-850.933	-2182.23	3372.61	277.243	-1701.83	-298.623	828.953	789.157	-3026
0	0	0	0	0	0	0	0	0	0	0	0	0	0	0	0	0	201.286	0	0	0	0	0	0	0	0	0	0	0	0	0	0	0	0	0	0	0	0	0	0	18	-912.333	-3436.65	-170.295	1644.5	-609.802	-692.804	-1305.18	69.008	1477.21
0	0	0	0	0	0	0	0	0	0	0	0	0	0	0	0	0	0	60.8527	0	0	0	0	0	0	0	0	0	0	0	0	0	0	0	0	0	0	0	0	0	19	978.147	-327.241	1416.77	-727.716	885.407	-1799.14	365.031	-438.008	765.609
0	0	0	0	0	0	0	0	0	0	0	0	0	0	0	0	0	0	0	29.3367	0	0	0	0	0	0	0	0	0	0	0	0	0	0	0	0	0	0	0	0	20	2444.13	1626.12	2093.6	-612.785	844.647	-179.021	-486.731	-258.404	729.883
0	0	0	0	0	0	0	0	0	0	0	0	0	0	0	0	0	0	0	0	307.51	0	0	0	0	0	0	0	0	0	0	0	0	0	0	0	0	0	0	0	21	952.747	842.413	-110.436	-314.786	1535.61	1201.83	-1346.04	-1763.14	-599.536
0	0	0	0	0	0	0	0	0	0	0	0	0	0	0	0	0	0	0	0	0	132.602	0	0	0	0	0	0	0	0	0	0	0	0	0	0	0	0	0	0	22	-1119.52	253.352	254.277	-704.757	-164.216	1360.02	2519.77	3253.98	-1018.7
0	0	0	0	0	0	0	0	0	0	0	0	0	0	0	0	0	0	0	0	0	0	288.963	0	0	0	0	0	0	0	0	0	0	0	0	0	0	0	0	0	23	550.187	2565.79	-542.219	-280.855	26.2034	-1165.64	-342.826	-1364.3	2787.36
0	0	0	0	0	0	0	0	0	0	0	0	0	0	0	0	0	0	0	0	0	0	0	280.893	0	0	0	0	0	0	0	0	0	0	0	0	0	0	0	0	24	1640.17	-279.309	720.224	-703.715	1303.92	-1270.19	1389.88	-226.9	-840.883
0	0	0	0	0	0	0	0	0	0	0	0	0	0	0	0	0	0	0	0	0	0	0	0	228.638	0	0	0	0	0	0	0	0	0	0	0	0	0	0	0	25	-530.912	-1087.27	-1317.87	387.449	-232.194	-1416.83	-1860.5	-1613.74	1528.12
0	0	0	0	0	0	0	0	0	0	0	0	0	0	0	0	0	0	0	0	0	0	0	0	0	307.882	0	0	0	0	0	0	0	0	0	0	0	0	0	0	26	626.346	1554.94	-830.189	661.622	1876.94	-807.932	-2714.98	-2853.97	2657.61
0	0	0	0	0	0	0	0	0	0	0	0	0	0	0	0	0	0	0	0	0	0	0	0	0	0	217.342	0	0	0	0	0	0	0	0	0	0	0	0	0	27	201.995	612.233	-113.995	215.193	-432.914	286.107	1354.92	-132.804	-381.592
0	0	0	0	0	0	0	0	0	0	0	0	0	0	0	0	0	0	0	0	0	0	0	0	0	0	0	210.104	0	0	0	0	0	0	0	0	0	0	0	0	28	1030.04	928.136	-74.4873	573.009	-527.528	1028.49	910.757	242.486	-463.13
0	0	0	0	0	0	0	0	0	0	0	0	0	0	0	0	0	0	0	0	0	0	0	0	0	0	0	0	214.34	0	0	0	0	0	0	0	0	0	0	0	29	1388.75	545.598	3626.5	-1304.73	971.456	687.741	478.966	532.384	-852.268
0	0	0	0	0	0	0	0	0	0	0	0	0	0	0	0	0	0	0	0	0	0	0	0	0	0	0	0	0	402.974	0	0	0	0	0	0	0	0	0	0	30	1296.4	584.777	1844.24	-557.024	-298.669	159.146	-1226.93	-236.348	-1259.96
0	0	0	0	0	0	0	0	0	0	0	0	0	0	0	0	0	0	0	0	0	0	0	0	0	0	0	0	0	0	167.602	0	0	0	0	0	0	0	0	0	31	198.265	715.373	-532.58	456.707	-329.938	-109.138	380.165	-282.658	-33.7605
0	0	0	0	0	0	0	0	0	0	0	0	0	0	0	0	0	0	0	0	0	0	0	0	0	0	0	0	0	0	0	50.4376	0	0	0	0	0	0	0	0	32	430.03	-1855.32	1368.06	-916.37	331.825	418.118	491.82	806.636	464.568
0	0	0	0	0	0	0	0	0	0	0	0	0	0	0	0	0	0	0	0	0	0	0	0	0	0	0	0	0	0	0	0	103.513	0	0	0	0	0	0	0	33	-97.7335	-119.283	-24.672	775.864	-157.42	112.024	316.729	-205.196	-453.516
0	0	0	0	0	0	0	0	0	0	0	0	0	0	0	0	0	0	0	0	0	0	0	0	0	0	0	0	0	0	0	0	0	294.881	0	0	0	0	0	0	34	-113.175	-246.431	57.3353	-362.413	15.642	-190.861	-298.493	-78.8907	136.103
0	0	0	0	0	0	0	0	0	0	0	0	0	0	0	0	0	0	0	0	0	0	0	0	0	0	0	0	0	0	0	0	0	0	430.539	0	0	0	0	0	35	180.002	-201.175	229.847	-35.452	99.175	160.343	225.805	240.882	104.006
0.00195312	0	0	0	0	0	0	0	0	0	0	0	0	0	0	0	0	0	0	0	0	0	0	0	0	0	0	0	0	0	0	0	0	0	0	0	0	0	0	0	36-dimensional	10986.2	790.607	-249.913	-1310.53	-893.049	4060.46	372.882	-372.251	-1712.68
0	429.698	0	0	0	0	0	0	0	0	0	0	0	0	0	0	0	0	0	0	0	0	0	0	0	0	0	0	0	0	0	0	0	0	0	0	0	0	0	0	2	790.607	30301.6	-988.52	581.508	-4401.2	2661.84	-1214.83	3015.05	-5810.88
0	0	496.714	0	0	0	0	0	0	0	0	0	0	0	0	0	0	0	0	0	0	0	0	0	0	0	0	0	0	0	0	0	0	0	0	0	0	0	0	0	3	-249.913	-988.52	33054.2	-3471.26	2594.74	2790.12	-2232.37	-2615.76	-2115.6
0	0	0	110.168	0	0	0	0	0	0	0	0	0	0	0	0	0	0	0	0	0	0	0	0	0	0	0	0	0	0	0	0	0	0	0	0	0	0	0	0	4	-1310.53	581.508	-3471.26	10300.9	-1683.97	-642.514	-57.7374	2490.11	-2480.74
0	0	0	0	389.296	0	0	0	0	0	0	0	0	0	0	0	0	0	0	0	0	0	0	0	0	0	0	0	0	0	0	0	0	0	0	0	0	0	0	0	5	-893.049	-4401.2	2594.74	-1683.97	20418.3	-250.365	-937.894	-3517.24	1495.82
0	0	0	0	0	299.061	0	0	0	0	0	0	0	0	0	0	0	0	0	0	0	0	0	0	0	0	0	0	0	0	0	0	0	0	0	0	0	0	0	0	6	4060.46	2661.84	2790.12	-642.514	-250.365	17493.4	2701.6	-5636.05	-2714.45
0	0	0	0	0	0	206.312	0	0	0	0	0	0	0	0	0	0	0	0	0	0	0	0	0	0	0	0	0	0	0	0	0	0	0	0	0	0	0	0	0	7	372.882	-1214.83	-2232.37	-57.7374	-937.894	2701.6	10719.2	-8.29809	407.11
0	0	0	0	0	0	0	261.142	0	0	0	0	0	0	0	0	0	0	0	0	0	0	0	0	0	0	0	0	0	0	0	0	0	0	0	0	0	0	0	0	8	-372.251	3015.05	-2615.76	2490.11	-3517.24	-5636.05	-8.29809	20435.3	-3193.55
0	0	0	0	0	0	0	0	253.771	0	0	0	0	0	0	0	0	0	0	0	0	0	0	0	0	0	0	0	0	0	0	0	0	0	0	0	0	0	0	0	9	-1712.68	-5810.88	-2115.6	-2480.74	1495.82	-2714.45	407.11	-3193.55	16465.7
0	0	0	0	0	0	0	0	0	333.501	0	0	0	0	0	0	0	0	0	0	0	0	0	0	0	0	0	0	0	0	0	0	0	0	0	0	0	0	0	0	10	-3998.84	503.263	-1831.84	385.527	-390.467	-5038.54	-77.41	2446.81	3217.3
0	0	0	0	0	0	0	0	0	0	380.778	0	0	0	0	0	0	0	0	0	0	0	0	0	0	0	0	0	0	0	0	0	0	0	0	0	0	0	0	0	11	1184.82	3695.87	-602.305	-1094.6	439.417	-2321.77	-4523.45	1071.33	123.501
0	0	0	0	0	0	0	0	0	0	0	154.602	0	0	0	0	0	0	0	0	0	0	0	0	0	0	0	0	0	0	0	0	0	0	0	0	0	0	0	0	12	-2632.1	-481.579	2340.38	-1357.26	566.603	-1124.59	-890.372	-1872.76	-469.955
0	0	0	0	0	0	0	0	0	0	0	0	45.8831	0	0	0	0	0	0	0	0	0	0	0	0	0	0	0	0	0	0	0	0	0	0	0	0	0	0	0	13	-1389.71	341.738	2242.92	-2563.72	-389.037	-351.067	273.004	-1166.86	2391.88
0	0	0	0	0	0	0	0	0	0	0	0	0	422.895	0	0	0	0	0	0	0	0	0	0	0	0	0	0	0	0	0	0	0	0	0	0	0	0	0	0	14	2379.13	-3142.8	-2841.52	968.407	562.521	3254.15	1150.07	-117.087	3220.16
0	0	0	0	0	0	0	0	0	0	0	0	0	0	199.47	0	0	0	0	0	0	0	0	0	0	0	0	0	0	0	0	0	0	0	0	0	0	0	0	0	15	2997.69	3464.9	5807.31	-4304.34	600.418	3365.83	2543.98	-2027.42	-386.845
0	0	0	0	0	0	0	0	0	0	0	0	0	0	0	396.957	0	0	0	0	0	0	0	0	0	0	0	0	0	0	0	0	0	0	0	0	0	0	0	0	16	2974.5	-2385.97	-1034.77	-3706.12	-1465.42	294.118	-373.361	-3854.89	5814.97
0	0	0	0	0	0	0	0	0	0	0	0	0	0	0	0	91.8386	0	0	0	0	0	0	0	0	0	0	0	0	0	0	0	0	0	0	0	0	0	0	0	17	1494.66	-2150.45	-2337.43	661.463	-2020.24	-1457.82	307.192	-376.382	-1006.99
0	0	0	0	0	0	0	0	0	0	0	0	0	0	0	0	0	55.9947	0	0	0	0	0	0	0	0	0	0	0	0	0	0	0	0	0	0	0	0	0	0	18	2493.8	-2673.75	-435.554	-1033.64	-1751.09	179.42	418.864	110.421	1284.92
0	0	0	0	0	0	0	0	0	0	0	0	0	0	0	0	0	0	463.441	0	0	0	0	0	0	0	0	0	0	0	0	0	0	0	0	0	0	0	0	0	19	1376.58	961.448	1868.11	-2749.64	-1834.44	2671.56	-260.706	1336.24	-777.569
0	0	0	0	0	0	0	0	0	0	0	0	0	0	0	0	0	0	0	448.692	0	0	0	0	0	0	0	0	0	0	0	0	0	0	0	0	0	0	0	0	20	-871.684	-787.987	5477.99	-2023.93	2868.07	-1835.41	1446.13	-3124.37	3635.59
0	0	0	0	0	0	0	0	0	0	0	0	0	0	0	0	0	0	0	0	511.894	0	0	0	0	0	0	0	0	0	0	0	0	0	0	0	0	0	0	0	21	-2439.52	-3294.77	-3613.79	2749.61	-154.555	-2528.66	1403.66	-1797.7	331.826
0	0	0	0	0	0	0	0	0	0	0	0	0	0	0	0	0	0	0	0	0	442.499	0	0	0	0	0	0	0	0	0	0	0	0	0	0	0	0	0	0	22	2425.59	650.069	-4038.03	-429.066	-232.35	-139.36	2448.58	-302.796	281.676
0	0	0	0	0	0	0	0	0	0	0	0	0	0	0	0	0	0	0	0	0	0	18.8832	0	0	0	0	0	0	0	0	0	0	0	0	0	0	0	0	0	23	-1190.84	-2275.01	2528.57	-1.55615	1492.72	2033.94	1822.08	-2787.72	457.194
0	0	0	0	0	0	0	0	0	0	0	0	0	0	0	0	0	0	0	0	0	0	0	278.878	0	0	0	0	0	0	0	0	0	0	0	0	0	0	0	0	24	140.894	4226.58	1032.35	930.38	-1269.42	645.278	-848.295	-474.051	-1562.97
0	0	0	0	0	0	0	0	0	0	0	0	0	0	0	0	0	0	0	0	0	0	0	0	510.779	0	0	0	0	0	0	0	0	0	0	0	0	0	0	0	25	203.886	2965.69	1569.8	1672.9	54.2721	2515.77	-567.576	-8.64641	-3601.6
0	0	0	0	0	0	0	0	0	0	0	0	0	0	0	0	0	0	0	0	0	0	0	0	0	261.637	0	0	0	0	0	0	0	0	0	0	0	0	0	0	26	-611.682	-1751.73	-393.864	-2215.66	1782.51	1204.46	-90.7408	-351.754	2657.8
0	0	0	0	0	0	0	0	0	0	0	0	0	0	0	0	0	0	0	0	0	0	0	0	0	0	447.238	0	0	0	0	0	0	0	0	0	0	0	0	0	27	-5093.91	685.443	-2510.65	1187.81	2492.87	-2662.18	-907.732	2420.22	1573.13
0	0	0	0	0	0	0	0	0	0	0	0	0	0	0	0	0	0	0	0	0	0	0	0	0	0	0	35.9552	0	0	0	0	0	0	0	0	0	0	0	0	28	200.681	17.9727	-369.818	477.873	139.92	549.251	29.3588	145.303	-552.579
0	0	0	0	0	0	0	0	0	0	0	0	0	0	0	0	0	0	0	0	0	0	0	0	0	0	0	0	505.62	0	0	0	0	0	0	0	0	0	0	0	29	1335.9	545.916	-1075.01	-1061.35	-1408.59	-11.0132	376.848	496.167	2058.38
0	0	0	0	0	0	0	0	0	0	0	0	0	0	0	0	0	0	0	0	0	0	0	0	0	0	0	0	0	472.429	0	0	0	0	0	0	0	0	0	0	30	607.914	-382.121	-1296.45	167.629	-190.21	-2528.41	-1142.27	2002.77	-989.389
0	0	0	0	0	0	0	0	0	0	0	0	0	0	0	0	0	0	0	0	0	0	0	0	0	0	0	0	0	0	288.902	0	0	0	0	0	0	0	0	0	31	386.06	2156.35	-1397.97	-494.703	810.143	43.3917	588.151	-1378.72	529.391
0	0	0	0	0	0	0	0	0	0	0	0	0	0	0	0	0	0	0	0	0	0	0	0	0	0	0	0	0	0	0	220.91	0	0	0	0	0	0	0	0	32	1228.41	-1140.04	-889.241	400.894	712.015	172.155	1233.38	402.703	550.053
0	0	0	0	0	0	0	0	0	0	0	0	0	0	0	0	0	0	0	0	0	0	0	0	0	0	0	0	0	0	0	0	172.978	0	0	0	0	0	0	0	33	142.214	-756.769	-116.474	563.985	-183.371	721.021	-637.03	805.67	-156.386
0	0	0	0	0	0	0	0	0	0	0	0	0	0	0	0	0	0	0	0	0	0	0	0	0	0	0	0	0	0	0	0	0	369.011	0	0	0	0	0	0	34	-508.798	2150.27	-537.074	1115.48	-1824.95	-321.287	-841.48	773.617	-964.549
0	0	0	0	0	0	0	0	0	0	0	0	0	0	0	0	0	0	0	0	0	0	0	0	0	0	0	0	0	0	0	0	0	0	6.99358	0	0	0	0	0	35	-18.0384	134.222	-40.4867	72.5322	-113.371	-1.87203	-103.384	63.2484	-113.599
0	0	0	0	0	0	0	0	0	0	0	0	0	0	0	0	0	0	0	0	0	0	0	0	0	0	0	0	0	0	0	0	0	0	0	512	0	0	0	0	36	-111.272	396.485	-138.719	230.269	-368.915	33.1213	-292.7	187.097	-311.044
0.00164238	0	0	0	0	0	0	0	0	0	0	0	0	0	0	0	0	0	0	0	0	0	0	0	0	0	0	0	0	0	0	0	0	0	0	0	0	0	0	0	37-dimensional	9957.88	1845.73	-6314.34	1703.08	2488.91	2025.73	-150.176	6175.11	4776
0	227.757	0	0	0	0	0	0	0	0	0	0	0	0	0	0	0	0	0	0	0	0	0	0	0	0	0	0	0	0	0	0	0	0	0	0	0	0	0	0	2	1845.73	16697.1	952.81	517.488	1293.75	-3193.26	761.626	-3309.15	-3507.65
0	0	561.799	0	0	0	0	0	0	0	0	0	0	0	0	0	0	0	0	0	0	0	0	0	0	0	0	0	0	0	0	0	0	0	0	0	0	0	0	0	3	-6314.34	952.81	37742.7	1129.24	-966.201	1748.41	2247.31	-3169.62	-356.045
0	0	0	332.738	0	0	0	0	0	0	0	0	0	0	0	0	0	0	0	0	0	0	0	0	0	0	0	0	0	0	0	0	0	0	0	0	0	0	0	0	4	1703.08	517.488	1129.24	21645.1	1749.89	-5354.7	61.1672	-5335.01	8785.37
0	0	0	0	288.538	0	0	0	0	0	0	0	0	0	0	0	0	0	0	0	0	0	0	0	0	0	0	0	0	0	0	0	0	0	0	0	0	0	0	0	5	2488.91	1293.75	-966.201	1749.89	17966.7	-514.148	3137.06	-2193.07	-3605.27
0	0	0	0	0	302.33	0	0	0	0	0	0	0	0	0	0	0	0	0	0	0	0	0	0	0	0	0	0	0	0	0	0	0	0	0	0	0	0	0	0	6	2025.73	-3193.26	1748.41	-5354.7	-514.148	28779.9	-2179.82	5348.11	-760.165
0	0	0	0	0	0	188.126	0	0	0	0	0	0	0	0	0	0	0	0	0	0	0	0	0	0	0	0	0	0	0	0	0	0	0	0	0	0	0	0	0	7	-150.176	761.626	2247.31	61.1672	3137.06	-2179.82	12960.5	-1158.18	3907.38
0	0	0	0	0	0	0	578.94	0	0	0	0	0	0	0	0	0	0	0	0	0	0	0	0	0	0	0	0	0	0	0	0	0	0	0	0	0	0	0	0	8	6175.11	-3309.15	-3169.62	-5335.01	-2193.07	5348.11	-1158.18	27915.4	-896.939
0	0	0	0	0	0	0	0	597.91	0	0	0	0	0	0	0	0	0	0	0	0	0	0	0	0	0	0	0	0	0	0	0	0	0	0	0	0	0	0	0	9	4776	-3507.65	-356.045	8785.37	-3605.27	-760.165	3907.38	-896.939	39771.3
0	0	0	0	0	0	0	0	0	312.696	0	0	0	0	0	0	0	0	0	0	0	0	0	0	0	0	0	0	0	0	0	0	0	0	0	0	0	0	0	0	10	-1077.99	198.503	-2777.76	-1480.59	-1587.96	-3899.49	1806.15	-2652.12	2343.96
0	0	0	0	0	0	0	0	0	0	604.362	0	0	0	0	0	0	0	0	0	0	0	0	0	0	0	0	0	0	0	0	0	0	0	0	0	0	0	0	0	11	304.183	1395.88	-836.966	-25.1923	-502.696	-8090.22	-4.66252	3691.55	-3436.12
0	0	0	0	0	0	0	0	0	0	0	277.552	0	0	0	0	0	0	0	0	0	0	0	0	0	0	0	0	0	0	0	0	0	0	0	0	0	0	0	0	12	-924.977	1594.86	-1343.85	-1817.66	2353.26	-583.673	-58.6425	90.6159	-1764.91
0	0	0	0	0	0	0	0	0	0	0	0	259.406	0	0	0	0	0	0	0	0	0	0	0	0	0	0	0	0	0	0	0	0	0	0	0	0	0	0	0	13	-498.054	552.661	2300.58	2443.46	-1963.1	-1983.39	-2779.56	-2311.83	786.527
0	0	0	0	0	0	0	0	0	0	0	0	0	129.822	0	0	0	0	0	0	0	0	0	0	0	0	0	0	0	0	0	0	0	0	0	0	0	0	0	0	14	-393.491	1193.65	2080.6	1197.99	-2820.44	-2150.29	748.431	-907.658	2457.9
0	0	0	0	0	0	0	0	0	0	0	0	0	0	117.666	0	0	0	0	0	0	0	0	0	0	0	0	0	0	0	0	0	0	0	0	0	0	0	0	0	15	-1283.44	-1797.96	1333.9	-1089.61	2376.13	2046.75	613.209	278.204	-3047.26
0	0	0	0	0	0	0	0	0	0	0	0	0	0	0	507.043	0	0	0	0	0	0	0	0	0	0	0	0	0	0	0	0	0	0	0	0	0	0	0	0	16	-2155.33	-5877.74	-1761.33	2674.56	850.583	-2480.69	-1614.06	-4050.13	3232.17
0	0	0	0	0	0	0	0	0	0	0	0	0	0	0	0	442.431	0	0	0	0	0	0	0	0	0	0	0	0	0	0	0	0	0	0	0	0	0	0	0	17	-1968.33	-2875.79	-2607.87	-1384.76	-738.947	564.751	4113.48	550.86	3546.58
0	0	0	0	0	0	0	0	0	0	0	0	0	0	0	0	0	322.549	0	0	0	0	0	0	0	0	0	0	0	0	0	0	0	0	0	0	0	0	0	0	18	237.959	1176.54	5074.25	281.896	-366.902	-3604.92	-126.171	-918.431	1685.99
0	0	0	0	0	0	0	0	0	0	0	0	0	0	0	0	0	0	504.806	0	0	0	0	0	0	0	0	0	0	0	0	0	0	0	0	0	0	0	0	0	19	2747.31	299.276	-48.6169	2564.79	92.8339	1813.59	-2442.64	-5401.19	5792.38
0	0	0	0	0	0	0	0	0	0	0	0	0	0	0	0	0	0	0	311.668	0	0	0	0	0	0	0	0	0	0	0	0	0	0	0	0	0	0	0	0	20	-1094.77	-650.272	1109.42	136.326	-1343.56	1341.93	-437.367	-1776.07	698.041
0	0	0	0	0	0	0	0	0	0	0	0	0	0	0	0	0	0	0	0	336.076	0	0	0	0	0	0	0	0	0	0	0	0	0	0	0	0	0	0	0	21	322.794	1243.55	3160.42	-3279.18	1054.98	-858.04	4117.92	-664.068	490.337
0	0	0	0	0	0	0	0	0	0	0	0	0	0	0	0	0	0	0	0	0	129.865	0	0	0	0	0	0	0	0	0	0	0	0	0	0	0	0	0	0	22	-156.983	1187.01	2718.57	1208.38	-1758.33	-2196.76	-646.535	-1156.77	598.304
0	0	0	0	0	0	0	0	0	0	0	0	0	0	0	0	0	0	0	0	0	0	357.909	0	0	0	0	0	0	0	0	0	0	0	0	0	0	0	0	0	23	2293.39	-395.004	-783.468	-3667.83	329.32	4242.95	-101.168	-961.922	-755.207
0	0	0	0	0	0	0	0	0	0	0	0	0	0	0	0	0	0	0	0	0	0	0	86.9262	0	0	0	0	0	0	0	0	0	0	0	0	0	0	0	0	24	-572.13	-365.345	832.357	596.771	792.418	-736.244	16.2461	-510.186	-667.084
0	0	0	0	0	0	0	0	0	0	0	0	0	0	0	0	0	0	0	0	0	0	0	0	31.7991	0	0	0	0	0	0	0	0	0	0	0	0	0	0	0	25	-3.15553	-501.692	-492.207	377.906	1416.02	331.228	510.617	230.53	84.0967
0	0	0	0	0	0	0	0	0	0	0	0	0	0	0	0	0	0	0	0	0	0	0	0	0	416.049	0	0	0	0	0	0	0	0	0	0	0	0	0	0	26	-588.05	165.849	3978.95	2555.58	-3027.37	-1726.37	-781.106	-943.054	1694.42
0	0	0	0	0	0	0	0	0	0	0	0	0	0	0	0	0	0	0	0	0	0	0	0	0	0	370.537	0	0	0	0	0	0	0	0	0	0	0	0	0	27	-361.355	-1325.98	-2268.2	-0.817848	-262.496	2634.6	1733	370.624	2793.56
0	0	0	0	0	0	0	0	0	0	0	0	0	0	0	0	0	0	0	0	0	0	0	0	0	0	0	133.744	0	0	0	0	0	0	0	0	0	0	0	0	28	1016.97	-358.599	-776.08	-602.86	291.691	-78.4724	-908.666	-60.2004	2229.89
0	0	0	0	0	0	0	0	0	0	0	0	0	0	0	0	0	0	0	0	0	0	0	0	0	0	0	0	247.374	0	0	0	0	0	0	0	0	0	0	0	29	535.582	780.485	1704.89	266.398	-1715.17	-1163.54	-1263.77	-390.426	651.645
0	0	0	0	0	0	0	0	0	0	0	0	0	0	0	0	0	0	0	0	0	0	0	0	0	0	0	0	0	383.535	0	0	0	0	0	0	0	0	0	0	30	-534.065	-1154.73	-1020.61	-2348.4	13.4226	550.925	-475.34	-123.164	-663.402
0	0	0	0	0	0	0	0	0	0	0	0	0	0	0	0	0	0	0	0	0	0	0	0	0	0	0	0	0	0	338.113	0	0	0	0	0	0	0	0	0	31	-2077.07	-98.3914	2554.73	478.729	-632.409	-740.357	-450.049	-399.651	-19.3781
0	0	0	0	0	0	0	0	0	0	0	0	0	0	0	0	0	0	0	0	0	0	0	0	0	0	0	0	0	0	0	77.681	0	0	0	0	0	0	0	0	32	242.177	-440.259	-1114.13	-656.166	987.144	1339.65	452.021	660.896	-450.613
0	0	0	0	0	0	0	0	0	0	0	0	0	0	0	0	0	0	0	0	0	0	0	0	0	0	0	0	0	0	0	0	103.022	0	0	0	0	0	0	0	33	384.177	245.503	558.283	204.685	-80.7948	302.775	760.955	354.912	-82.2453
0	0	0	0	0	0	0	0	0	0	0	0	0	0	0	0	0	0	0	0	0	0	0	0	0	0	0	0	0	0	0	0	0	0.61016	0	0	0	0	0	0	34	-145.686	261.876	1308.58	309.345	-1089.4	-1109.88	-373.043	-696.603	344.961
0	0	0	0	0	0	0	0	0	0	0	0	0	0	0	0	0	0	0	0	0	0	0	0	0	0	0	0	0	0	0	0	0	0	254.609	0	0	0	0	0	35	-441.331	291.123	2151.15	144.752	-1271.9	-1270.83	-367.496	-1121.89	757.135
0	0	0	0	0	0	0	0	0	0	0	0	0	0	0	0	0	0	0	0	0	0	0	0	0	0	0	0	0	0	0	0	0	0	0	297.427	0	0	0	0	36	-166.348	-477.955	-1310.14	-602.601	552.843	650.392	-371.729	232.412	-271.404
0	0	0	0	0	0	0	0	0	0	0	0	0	0	0	0	0	0	0	0	0	0	0	0	0	0	0	0	0	0	0	0	0	0	0	0	608.874	0	0	0	37	-138.611	194.486	1048.13	226.604	-908.808	-920.162	-350.471	-590.516	280.304
0.00138107	0	0	0	0	0	0	0	0	0	0	0	0	0	0	0	0	0	0	0	0	0	0	0	0	0	0	0	0	0	0	0	0	0	0	0	0	0	0	0	38-dimensional	13249.4	-1301.63	-3096.79	314.626	-1863.47	10200.9	-3793.99	-3500.52	-860.287
0	115.759	0	0	0	0	0	0	0	0	0	0	0	0	0	0	0	0	0	0	0	0	0	0	0	0	0	0	0	0	0	0	0	0	0	0	0	0	0	0	2	-1301.63	14509.8	1422.58	3106.89	858.174	-2769.14	3771.7	2600.8	-863.078
0	0	482.843	0	0	0	0	0	0	0	0	0	0	0	0	0	0	0	0	0	0	0	0	0	0	0	0	0	0	0	0	0	0	0	0	0	0	0	0	0	3	-3096.79	1422.58	25424.6	-1138.66	-4605.71	-3782.61	-1581.58	2329.82	-2122.71
0	0	0	12.9771	0	0	0	0	0	0	0	0	0	0	0	0	0	0	0	0	0	0	0	0	0	0	0	0	0	0	0	0	0	0	0	0	0	0	0	0	4	314.626	3106.89	-1138.66	13858.1	613.947	-316.533	-2495.5	2002.02	-3983.34
0	0	0	0	86.6554	0	0	0	0	0	0	0	0	0	0	0	0	0	0	0	0	0	0	0	0	0	0	0	0	0	0	0	0	0	0	0	0	0	0	0	5	-1863.47	858.174	-4605.71	613.947	15940	-4391.93	4102.26	-1142.67	748.725
0	0	0	0	0	689.412	0	0	0	0	0	0	0	0	0	0	0	0	0	0	0	0	0	0	0	0	0	0	0	0	0	0	0	0	0	0	0	0	0	0	6	10200.9	-2769.14	-3782.61	-316.533	-4391.93	44543.5	10842.4	2490.34	-4297.37
0	0	0	0	0	0	706.594	0	0	0	0	0	0	0	0	0	0	0	0	0	0	0	0	0	0	0	0	0	0	0	0	0	0	0	0	0	0	0	0	0	7	-3793.99	3771.7	-1581.58	-2495.5	4102.26	10842.4	38739.5	2143.57	-5383.5
0	0	0	0	0	0	0	22.3859	0	0	0	0	0	0	0	0	0	0	0	0	0	0	0	0	0	0	0	0	0	0	0	0	0	0	0	0	0	0	0	0	8	-3500.52	2600.8	2329.82	2002.02	-1142.67	2490.34	2143.57	10365.2	-3008.93
0	0	0	0	0	0	0	0	357.609	0	0	0	0	0	0	0	0	0	0	0	0	0	0	0	0	0	0	0	0	0	0	0	0	0	0	0	0	0	0	0	9	-860.287	-863.078	-2122.71	-3983.34	748.725	-4297.37	-5383.5	-3008.93	23690.9
0	0	0	0	0	0	0	0	0	624.678	0	0	0	0	0	0	0	0	0	0	0	0	0	0	0	0	0	0	0	0	0	0	0	0	0	0	0	0	0	0	10	-4452.24	-4658.15	-4662.44	602.198	3190.53	427.477	1983.76	439.353	776.387
0	0	0	0	0	0	0	0	0	0	175.862	0	0	0	0	0	0	0	0	0	0	0	0	0	0	0	0	0	0	0	0	0	0	0	0	0	0	0	0	0	11	-3017.04	-1058.73	1000.08	-2721.1	1448	-1132.92	4188.75	117.937	68.0383
0	0	0	0	0	0	0	0	0	0	0	604.076	0	0	0	0	0	0	0	0	0	0	0	0	0	0	0	0	0	0	0	0	0	0	0	0	0	0	0	0	12	-7011.7	2209	1785.99	1028.26	-4957.83	-2117.53	-807.508	5981.04	5454.22
0	0	0	0	0	0	0	0	0	0	0	0	589.103	0	0	0	0	0	0	0	0	0	0	0	0	0	0	0	0	0	0	0	0	0	0	0	0	0	0	0	13	1465.98	28.4235	-995.569	2547.44	-58.5722	-2190	-3720.88	-970.649	-513.351
0	0	0	0	0	0	0	0	0	0	0	0	0	455.426	0	0	0	0	0	0	0	0	0	0	0	0	0	0	0	0	0	0	0	0	0	0	0	0	0	0	14	197.525	-314.042	1517.96	-5735.46	-5580.09	3168.82	-1745.62	-502.104	4770.33
0	0	0	0	0	0	0	0	0	0	0	0	0	0	1.62201	0	0	0	0	0	0	0	0	0	0	0	0	0	0	0	0	0	0	0	0	0	0	0	0	0	15	-4061.57	74.3815	-225.657	-3617.41	1471.43	-94.6934	3706.89	2722.5	240.862
0	0	0	0	0	0	0	0	0	0	0	0	0	0	0	274.95	0	0	0	0	0	0	0	0	0	0	0	0	0	0	0	0	0	0	0	0	0	0	0	0	16	-1606.44	-1184.6	-1015.52	-5375.8	-1217.51	5540.9	2606.44	3566.4	-383.469
0	0	0	0	0	0	0	0	0	0	0	0	0	0	0	0	654.86	0	0	0	0	0	0	0	0	0	0	0	0	0	0	0	0	0	0	0	0	0	0	0	17	-769.78	-1036.89	2014.96	1653.35	-7064.06	620.54	-7424.34	109.09	-2189.41
0	0	0	0	0	0	0	0	0	0	0	0	0	0	0	0	0	492.628	0	0	0	0	0	0	0	0	0	0	0	0	0	0	0	0	0	0	0	0	0	0	18	-487.509	4416.5	1322.2	-2403.22	868.27	4675.7	6934.26	2421.98	3639.88
0	0	0	0	0	0	0	0	0	0	0	0	0	0	0	0	0	0	274.298	0	0	0	0	0	0	0	0	0	0	0	0	0	0	0	0	0	0	0	0	0	19	-4413.3	1278.9	-108.037	-1592.61	1817.35	-5165.31	-1763.39	-243.023	-361.53
0	0	0	0	0	0	0	0	0	0	0	0	0	0	0	0	0	0	0	457.585	0	0	0	0	0	0	0	0	0	0	0	0	0	0	0	0	0	0	0	0	20	-2404.56	-2363.52	-2024.88	-64.725	1784.99	1449.91	1789.53	186.602	97.0021
0	0	0	0	0	0	0	0	0	0	0	0	0	0	0	0	0	0	0	0	176.147	0	0	0	0	0	0	0	0	0	0	0	0	0	0	0	0	0	0	0	21	-2111.2	-487.229	3816.87	395.878	-1516.69	1208.95	1376.12	4270.89	-2772.76
0	0	0	0	0	0	0	0	0	0	0	0	0	0	0	0	0	0	0	0	0	413.748	0	0	0	0	0	0	0	0	0	0	0	0	0	0	0	0	0	0	22	1987.82	1383.22	-4452.81	5465.29	-475.738	2777.55	-1287.89	-1672.65	1747.85
0	0	0	0	0	0	0	0	0	0	0	0	0	0	0	0	0	0	0	0	0	0	710.848	0	0	0	0	0	0	0	0	0	0	0	0	0	0	0	0	0	23	2647.96	-2398.94	-1410.79	-1827.93	534.273	-89.8652	-3604.23	-436.559	-174.907
0	0	0	0	0	0	0	0	0	0	0	0	0	0	0	0	0	0	0	0	0	0	0	615.236	0	0	0	0	0	0	0	0	0	0	0	0	0	0	0	0	24	598.513	-2512.21	1537.42	-1394.61	-2827.4	3082.05	5140.85	-370.522	2750.22
0	0	0	0	0	0	0	0	0	0	0	0	0	0	0	0	0	0	0	0	0	0	0	0	205.237	0	0	0	0	0	0	0	0	0	0	0	0	0	0	0	25	-70.7712	-1892.66	-1106.5	2363.79	1392.16	-4125.88	-5433.94	783.167	850.051
0	0	0	0	0	0	0	0	0	0	0	0	0	0	0	0	0	0	0	0	0	0	0	0	0	494.153	0	0	0	0	0	0	0	0	0	0	0	0	0	0	26	-2349.99	2945.82	-291.793	633.596	2120.96	2638.78	3767.7	4127.69	-1233.39
0	0	0	0	0	0	0	0	0	0	0	0	0	0	0	0	0	0	0	0	0	0	0	0	0	0	259.311	0	0	0	0	0	0	0	0	0	0	0	0	0	27	-315.949	542.846	144.493	1014.85	1878.53	-2892.02	-795.706	-670.844	937.231
0	0	0	0	0	0	0	0	0	0	0	0	0	0	0	0	0	0	0	0	0	0	0	0	0	0	0	714.611	0	0	0	0	0	0	0	0	0	0	0	0	28	-2744.25	-1513.42	-1995.82	-3317.73	3404.79	-722.958	2777.16	-2733.63	992.479
0	0	0	0	0	0	0	0	0	0	0	0	0	0	0	0	0	0	0	0	0	0	0	0	0	0	0	0	60.8138	0	0	0	0	0	0	0	0	0	0	0	29	-1622.35	1178.17	169.907	241.318	-40.3043	1866.4	373.454	275.285	-1210.81
0	0	0	0	0	0	0	0	0	0	0	0	0	0	0	0	0	0	0	0	0	0	0	0	0	0	0	0	0	181.242	0	0	0	0	0	0	0	0	0	0	30	379.6	-636.453	-1807.54	1807.07	85.8442	-1371.7	-1553.04	-446.599	-381.375
0	0	0	0	0	0	0	0	0	0	0	0	0	0	0	0	0	0	0	0	0	0	0	0	0	0	0	0	0	0	587.478	0	0	0	0	0	0	0	0	0	31	-2233.35	-663.974	-1739.16	3371.31	2973.06	-5394.34	-2474.42	-1619.65	-756.346
0	0	0	0	0	0	0	0	0	0	0	0	0	0	0	0	0	0	0	0	0	0	0	0	0	0	0	0	0	0	0	61.1301	0	0	0	0	0	0	0	0	32	1260.65	-1348.4	-1082.21	1348.16	-1490.16	1417.6	-1548.74	-890.125	-667.427
0	0	0	0	0	0	0	0	0	0	0	0	0	0	0	0	0	0	0	0	0	0	0	0	0	0	0	0	0	0	0	0	384.67	0	0	0	0	0	0	0	33	714.094	-1866.81	1266.17	599.263	884.383	-5022.48	-3911.1	313.868	768.23
0	0	0	0	0	0	0	0	0	0	0	0	0	0	0	0	0	0	0	0	0	0	0	0	0	0	0	0	0	0	0	0	0	579.713	0	0	0	0	0	0	34	88.1226	312.811	1392.24	-1745.48	-1444.72	2264.38	836.497	463.003	240.003
0	0	0	0	0	0	0	0	0	0	0	0	0	0	0	0	0	0	0	0	0	0	0	0	0	0	0	0	0	0	0	0	0	0	534.966	0	0	0	0	0	35	-1682.08	2075.05	2751.88	-2762.22	-207.432	2575.9	2147.68	1686.51	-87.72
0	0	0	0	0	0	0	0	0	0	0	0	0	0	0	0	0	0	0	0	0	0	0	0	0	0	0	0	0	0	0	0	0	0	0	102.576	0	0	0	0	36	642.4	896.885	683.122	-199.108	823.45	-2075.11	-644.066	666.038	2160.42
0	0	0	0	0	0	0	0	0	0	0	0	0	0	0	0	0	0	0	0	0	0	0	0	0	0	0	0	0	0	0	0	0	0	0	0	317.07	0	0	0	37	179.158	-297.862	385.963	868.733	123.281	-580.356	-1520.43	392.222	-216.474
0	0	0	0	0	0	0	0	0	0	0	0	0	0	0	0	0	0	0	0	0	0	0	0	0	0	0	0	0	0	0	0	0	0	0	0	0	724.077	0	0	38	-431.947	232.084	-797.067	-1255.04	-421.131	1421.06	2570.88	-782.435	-234.859
0.00116134	0	0	0	0	0	0	0	0	0	0	0	0	0	0	0	0	0	0	0	0	0	0	0	0	0	0	0	0	0	0	0	0	0	0	0	0	0	0	0	39-dimensional	17866.7	4865.73	935.958	314.75	631.674	-1546.9	3161.73	1961.43	7961.4
0	301.706	0	0	0	0	0	0	0	0	0	0	0	0	0	0	0	0	0	0	0	0	0	0	0	0	0	0	0	0	0	0	0	0	0	0	0	0	0	0	2	4865.73	27186.9	-1709.07	2034.83	-5911.94	2344.3	-1208.58	4394.2	3953.69
0	0	412.024	0	0	0	0	0	0	0	0	0	0	0	0	0	0	0	0	0	0	0	0	0	0	0	0	0	0	0	0	0	0	0	0	0	0	0	0	0	3	935.958	-1709.07	42628.8	5099.6	-2192.92	-5992.04	1059.68	998.177	4404.83
0	0	0	505.801	0	0	0	0	0	0	0	0	0	0	0	0	0	0	0	0	0	0	0	0	0	0	0	0	0	0	0	0	0	0	0	0	0	0	0	0	4	314.75	2034.83	5099.6	32489.1	-451.433	3188.16	196.558	3867.54	-2317.46
0	0	0	0	125.551	0	0	0	0	0	0	0	0	0	0	0	0	0	0	0	0	0	0	0	0	0	0	0	0	0	0	0	0	0	0	0	0	0	0	0	5	631.674	-5911.94	-2192.92	-451.433	20379.3	8193.61	-1028.34	-4648.72	933.75
0	0	0	0	0	779.56	0	0	0	0	0	0	0	0	0	0	0	0	0	0	0	0	0	0	0	0	0	0	0	0	0	0	0	0	0	0	0	0	0	0	6	-1546.9	2344.3	-5992.04	3188.16	8193.61	41121.4	3165.36	2276.31	-4545.38
0	0	0	0	0	0	551.258	0	0	0	0	0	0	0	0	0	0	0	0	0	0	0	0	0	0	0	0	0	0	0	0	0	0	0	0	0	0	0	0	0	7	3161.73	-1208.58	1059.68	196.558	-1028.34	3165.36	35101.9	2723.34	-5863.27
0	0	0	0	0	0	0	140.305	0	0	0	0	0	0	0	0	0	0	0	0	0	0	0	0	0	0	0	0	0	0	0	0	0	0	0	0	0	0	0	0	8	1961.43	4394.2	998.177	3867.54	-4648.72	2276.31	2723.34	18027.7	-4320.19
0	0	0	0	0	0	0	0	487.294	0	0	0	0	0	0	0	0	0	0	0	0	0	0	0	0	0	0	0	0	0	0	0	0	0	0	0	0	0	0	0	9	7961.4	3953.69	4404.83	-2317.46	933.75	-4545.38	-5863.27	-4320.19	33458.5
0	0	0	0	0	0	0	0	0	802.194	0	0	0	0	0	0	0	0	0	0	0	0	0	0	0	0	0	0	0	0	0	0	0	0	0	0	0	0	0	0	10	6146.64	-2203.15	6028.37	1704.26	-4548.34	-11995.6	-3125.04	-617.577	-787.305
0	0	0	0	0	0	0	0	0	0	674.312	0	0	0	0	0	0	0	0	0	0	0	0	0	0	0	0	0	0	0	0	0	0	0	0	0	0	0	0	0	11	4844.33	-613.392	-6047.29	5986.29	780.138	5564.44	1834.55	8092.63	-5462.79
0	0	0	0	0	0	0	0	0	0	0	590.43	0	0	0	0	0	0	0	0	0	0	0	0	0	0	0	0	0	0	0	0	0	0	0	0	0	0	0	0	12	-726.63	-4099.62	9495.4	3518.06	-1051.26	232.27	603.515	3431.14	-2851.38
0	0	0	0	0	0	0	0	0	0	0	0	401.452	0	0	0	0	0	0	0	0	0	0	0	0	0	0	0	0	0	0	0	0	0	0	0	0	0	0	0	13	-3810.76	7637.23	675.613	-215.262	-6060.29	420.459	-9257.62	-1286.39	3736.87
0	0	0	0	0	0	0	0	0	0	0	0	0	224.155	0	0	0	0	0	0	0	0	0	0	0	0	0	0	0	0	0	0	0	0	0	0	0	0	0	0	14	1819.92	68.8517	4994.84	-2016.96	-435.374	3377.29	4243.92	-5.81813	3726.72
0	0	0	0	0	0	0	0	0	0	0	0	0	0	490.185	0	0	0	0	0	0	0	0	0	0	0	0	0	0	0	0	0	0	0	0	0	0	0	0	0	15	3194.13	2208.84	-2135.82	-2489.61	3051.9	5012.95	3161.24	2414.97	5100.24
0	0	0	0	0	0	0	0	0	0	0	0	0	0	0	214.212	0	0	0	0	0	0	0	0	0	0	0	0	0	0	0	0	0	0	0	0	0	0	0	0	16	-3477.17	-297.89	-2555.07	173.874	-128.466	1697.84	-215.829	1589.17	-7857.12
0	0	0	0	0	0	0	0	0	0	0	0	0	0	0	0	274.944	0	0	0	0	0	0	0	0	0	0	0	0	0	0	0	0	0	0	0	0	0	0	0	17	1473.67	-5038.99	1006.46	-2909.95	3965.49	5887.39	-488.776	-3333.05	5141.63
0	0	0	0	0	0	0	0	0	0	0	0	0	0	0	0	0	784.272	0	0	0	0	0	0	0	0	0	0	0	0	0	0	0	0	0	0	0	0	0	0	18	3735.64	712.402	9085.26	312.656	2505.89	-7853.7	5782.1	550.8	1632.02
0	0	0	0	0	0	0	0	0	0	0	0	0	0	0	0	0	0	762.244	0	0	0	0	0	0	0	0	0	0	0	0	0	0	0	0	0	0	0	0	0	19	7382.86	-441.046	1484.51	844.085	-1827.09	2040.73	6162.3	4244.22	-1985.5
0	0	0	0	0	0	0	0	0	0	0	0	0	0	0	0	0	0	0	684.204	0	0	0	0	0	0	0	0	0	0	0	0	0	0	0	0	0	0	0	0	20	-2208.21	-4355.26	4658.41	-2975.76	-4382.53	-2670.65	1997.48	979.934	-1975.31
0	0	0	0	0	0	0	0	0	0	0	0	0	0	0	0	0	0	0	0	797.194	0	0	0	0	0	0	0	0	0	0	0	0	0	0	0	0	0	0	0	21	-7834.83	-2704.19	-1802.76	8443.57	1476.65	5399.27	2684.65	-740.065	-10760.2
0	0	0	0	0	0	0	0	0	0	0	0	0	0	0	0	0	0	0	0	0	153.996	0	0	0	0	0	0	0	0	0	0	0	0	0	0	0	0	0	0	22	-799.138	-2378.73	-120.804	-2190.54	-39.1296	-1432.05	-1560.88	-2799.23	-129.008
0	0	0	0	0	0	0	0	0	0	0	0	0	0	0	0	0	0	0	0	0	0	445.644	0	0	0	0	0	0	0	0	0	0	0	0	0	0	0	0	0	23	54.8748	3339.4	1796.28	2600.39	-4794.4	984.45	840.789	5526.13	-3805.06
0	0	0	0	0	0	0	0	0	0	0	0	0	0	0	0	0	0	0	0	0	0	0	539.901	0	0	0	0	0	0	0	0	0	0	0	0	0	0	0	0	24	-1566.19	-258.705	2645.71	2883.75	-5433.6	-4458.69	-6422.91	-1062.09	2822.65
0	0	0	0	0	0	0	0	0	0	0	0	0	0	0	0	0	0	0	0	0	0	0	0	786.321	0	0	0	0	0	0	0	0	0	0	0	0	0	0	0	25	1494.43	-5208.13	919.334	-3403.18	7040.34	5953.35	-914.68	-6300.74	3784.42
0	0	0	0	0	0	0	0	0	0	0	0	0	0	0	0	0	0	0	0	0	0	0	0	0	571.729	0	0	0	0	0	0	0	0	0	0	0	0	0	0	26	-2236.76	1565.35	-3516.48	-805.366	963.432	3.94724	-2659.14	-1048.57	-1595.9
0	0	0	0	0	0	0	0	0	0	0	0	0	0	0	0	0	0	0	0	0	0	0	0	0	0	335.126	0	0	0	0	0	0	0	0	0	0	0	0	0	27	2142.4	-1480.58	-1341.29	1714.17	2058.38	-2806.82	1876	613.085	-730.429
0	0	0	0	0	0	0	0	0	0	0	0	0	0	0	0	0	0	0	0	0	0	0	0	0	0	0	637.204	0	0	0	0	0	0	0	0	0	0	0	0	28	925.423	-3773.08	1674.39	-2984.41	1824.8	-7530.25	459.593	-6709.12	1754.26
0	0	0	0	0	0	0	0	0	0	0	0	0	0	0	0	0	0	0	0	0	0	0	0	0	0	0	0	704.048	0	0	0	0	0	0	0	0	0	0	0	29	-938.423	-328.877	1581.22	-758.334	-127.717	-208.063	-1820.9	-4150.61	4525.83
0	0	0	0	0	0	0	0	0	0	0	0	0	0	0	0	0	0	0	0	0	0	0	0	0	0	0	0	0	516.944	0	0	0	0	0	0	0	0	0	0	30	-377.45	4425.33	-66.4545	-3016.14	-709.929	5121.35	-2044.75	946.551	86.271
0	0	0	0	0	0	0	0	0	0	0	0	0	0	0	0	0	0	0	0	0	0	0	0	0	0	0	0	0	0	73.1902	0	0	0	0	0	0	0	0	0	31	1430.27	1821.24	-29.6691	1403.51	1667.42	1318.5	657.152	728.828	1980.88
0	0	0	0	0	0	0	0	0	0	0	0	0	0	0	0	0	0	0	0	0	0	0	0	0	0	0	0	0	0	0	794.222	0	0	0	0	0	0	0	0	32	-1119.89	-217.323	-460.325	-1386.56	3552.63	5957.08	713.543	-173.614	3617.38
0	0	0	0	0	0	0	0	0	0	0	0	0	0	0	0	0	0	0	0	0	0	0	0	0	0	0	0	0	0	0	0	46.153	0	0	0	0	0	0	0	33	-1631.9	595.177	-103.713	-885.317	-1303.88	1203.56	-47.4164	1596.82	100.207
0	0	0	0	0	0	0	0	0	0	0	0	0	0	0	0	0	0	0	0	0	0	0	0	0	0	0	0	0	0	0	0	0	453.81	0	0	0	0	0	0	34	-1216.96	-78.0639	-149.115	-1236.57	-504.333	-151.905	727.173	506.297	-975.504
0	0	0	0	0	0	0	0	0	0	0	0	0	0	0	0	0	0	0	0	0	0	0	0	0	0	0	0	0	0	0	0	0	0	102.343	0	0	0	0	0	35	725.62	-2555.4	264.047	-89.6471	1600.16	-2528.76	761.373	-2665.38	-554.504
0	0	0	0	0	0	0	0	0	0	0	0	0	0	0	0	0	0	0	0	0	0	0	0	0	0	0	0	0	0	0	0	0	0	0	327.333	0	0	0	0	36	-517.698	-1620.25	582.432	-159.65	356.453	-689.611	-152.18	-750.781	251.457
0	0	0	0	0	0	0	0	0	0	0	0	0	0	0	0	0	0	0	0	0	0	0	0	0	0	0	0	0	0	0	0	0	0	0	0	699.912	0	0	0	37	351.701	2537.08	-949.725	-182.553	-1250.03	2024.75	-44.4649	1759.35	724.567
0	0	0	0	0	0	0	0	0	0	0	0	0	0	0	0	0	0	0	0	0	0	0	0	0	0	0	0	0	0	0	0	0	0	0	0	0	210.186	0	0	38	57.8026	574.599	-518.817	-209.876	-530.779	461.125	8.59456	252.795	64.8415
0	0	0	0	0	0	0	0	0	0	0	0	0	0	0	0	0	0	0	0	0	0	0	0	0	0	0	0	0	0	0	0	0	0	0	0	0	0	861.078	0	39	215.141	-692.84	363.248	18.7341	477.033	-446.867	72.0748	-612.199	292.437
0.000976562	0	0	0	0	0	0	0	0	0	0	0	0	0	0	0	0	0	0	0	0	0	0	0	0	0	0	0	0	0	0	0	0	0	0	0	0	0	0	0	40-dimensional	23049.5	9076.31	-2808.79	1084.4	1036.93	-4184.09	1562.53	-1727.91	4311.75
0	905.649	0	0	0	0	0	0	0	0	0	0	0	0	0	0	0	0	0	0	0	0	0	0	0	0	0	0	0	0	0	0	0	0	0	0	0	0	0	0	2	9076.31	55275.9	3962.49	-6681.82	163.525	-3364.2	5752.39	-4065.82	11466.2
0	0	729.751	0	0	0	0	0	0	0	0	0	0	0	0	0	0	0	0	0	0	0	0	0	0	0	0	0	0	0	0	0	0	0	0	0	0	0	0	0	3	-2808.79	3962.49	40758.2	-2710.09	-2881.8	-732.252	3627.62	2275.65	-6041.2
0	0	0	387.225	0	0	0	0	0	0	0	0	0	0	0	0	0	0	0	0	0	0	0	0	0	0	0	0	0	0	0	0	0	0	0	0	0	0	0	0	4	1084.4	-6681.82	-2710.09	27877.5	-868.547	909.201	-565.555	720.227	-1380.92
0	0	0	0	254.894	0	0	0	0	0	0	0	0	0	0	0	0	0	0	0	0	0	0	0	0	0	0	0	0	0	0	0	0	0	0	0	0	0	0	0	5	1036.93	163.525	-2881.8	-868.547	16607.8	1763.36	1551.31	-1400.67	5244.94
0	0	0	0	0	258.923	0	0	0	0	0	0	0	0	0	0	0	0	0	0	0	0	0	0	0	0	0	0	0	0	0	0	0	0	0	0	0	0	0	0	6	-4184.09	-3364.2	-732.252	909.201	1763.36	21769	-3408.85	-932.743	1081.37
0	0	0	0	0	0	785.658	0	0	0	0	0	0	0	0	0	0	0	0	0	0	0	0	0	0	0	0	0	0	0	0	0	0	0	0	0	0	0	0	0	7	1562.53	5752.39	3627.62	-565.555	1551.31	-3408.85	36925.7	-936.499	5649.25
0	0	0	0	0	0	0	51.0595	0	0	0	0	0	0	0	0	0	0	0	0	0	0	0	0	0	0	0	0	0	0	0	0	0	0	0	0	0	0	0	0	8	-1727.91	-4065.82	2275.65	720.227	-1400.67	-932.743	-936.499	16366.2	-3231.69
0	0	0	0	0	0	0	0	701.736	0	0	0	0	0	0	0	0	0	0	0	0	0	0	0	0	0	0	0	0	0	0	0	0	0	0	0	0	0	0	0	9	4311.75	11466.2	-6041.2	-1380.92	5244.94	1081.37	5649.25	-3231.69	43319
0	0	0	0	0	0	0	0	0	635.165	0	0	0	0	0	0	0	0	0	0	0	0	0	0	0	0	0	0	0	0	0	0	0	0	0	0	0	0	0	0	10	8106.5	342.399	-1849	-181.106	-1689.61	835.161	-1030.28	2709.44	4761.13
0	0	0	0	0	0	0	0	0	0	764.605	0	0	0	0	0	0	0	0	0	0	0	0	0	0	0	0	0	0	0	0	0	0	0	0	0	0	0	0	0	11	-4578.61	-1490.19	-2080.23	2851.49	1579.64	1003.09	2170.93	-5274.21	-10257
0	0	0	0	0	0	0	0	0	0	0	1000.71	0	0	0	0	0	0	0	0	0	0	0	0	0	0	0	0	0	0	0	0	0	0	0	0	0	0	0	0	12	9539.53	7122.42	-9113.63	4261.84	4812.47	-3281.89	-4472.71	-5959.51	4545.45
0	0	0	0	0	0	0	0	0	0	0	0	393.128	0	0	0	0	0	0	0	0	0	0	0	0	0	0	0	0	0	0	0	0	0	0	0	0	0	0	0	13	-168.937	-1300.12	4768.46	1982.79	-4452.16	-1035.24	-2852.25	1156.27	-6545.81
0	0	0	0	0	0	0	0	0	0	0	0	0	266.451	0	0	0	0	0	0	0	0	0	0	0	0	0	0	0	0	0	0	0	0	0	0	0	0	0	0	14	771.613	-4735.69	847.445	-1361.94	-2143.15	-450.805	-4542.22	-3916.29	-1850.44
0	0	0	0	0	0	0	0	0	0	0	0	0	0	898.529	0	0	0	0	0	0	0	0	0	0	0	0	0	0	0	0	0	0	0	0	0	0	0	0	0	15	3936.18	-3276.29	1673.53	-867.121	-4511.26	751.283	-4350.45	3320.77	-2547.13
0	0	0	0	0	0	0	0	0	0	0	0	0	0	0	825.442	0	0	0	0	0	0	0	0	0	0	0	0	0	0	0	0	0	0	0	0	0	0	0	0	16	7463.98	-199.222	2472.01	-2267.43	1184.18	3513.18	4610.82	361.278	945.68
0	0	0	0	0	0	0	0	0	0	0	0	0	0	0	0	472.189	0	0	0	0	0	0	0	0	0	0	0	0	0	0	0	0	0	0	0	0	0	0	0	17	-3663.61	2101.76	-2960.83	-6255.86	3469.33	-4025.8	-2564.57	-1082.47	-2370.26
0	0	0	0	0	0	0	0	0	0	0	0	0	0	0	0	0	93.1457	0	0	0	0	0	0	0	0	0	0	0	0	0	0	0	0	0	0	0	0	0	0	18	-861.401	-918.519	-1179.76	-3339.51	1193.97	-2093.83	2003.93	-4884.96	-53.7905
0	0	0	0	0	0	0	0	0	0	0	0	0	0	0	0	0	0	577.812	0	0	0	0	0	0	0	0	0	0	0	0	0	0	0	0	0	0	0	0	0	19	-3990.24	-6114.94	1613.32	1284.77	1482.67	-3409.32	-559.668	2126.41	-1751.99
0	0	0	0	0	0	0	0	0	0	0	0	0	0	0	0	0	0	0	191.881	0	0	0	0	0	0	0	0	0	0	0	0	0	0	0	0	0	0	0	0	20	-187.514	-610.887	-326.533	3147.65	1133.55	-589.192	1156.69	6116.18	87.4912
0	0	0	0	0	0	0	0	0	0	0	0	0	0	0	0	0	0	0	0	544.451	0	0	0	0	0	0	0	0	0	0	0	0	0	0	0	0	0	0	0	21	-6361.44	1918.36	5335.72	-1311.21	-1031.66	4409.05	3798.39	-725.946	-916.921
0	0	0	0	0	0	0	0	0	0	0	0	0	0	0	0	0	0	0	0	0	363.555	0	0	0	0	0	0	0	0	0	0	0	0	0	0	0	0	0	0	22	-7979.9	-7610.94	-276.097	3899.75	1903.82	-1157.83	2536.59	-2582.77	-7094.65
0	0	0	0	0	0	0	0	0	0	0	0	0	0	0	0	0	0	0	0	0	0	322.339	0	0	0	0	0	0	0	0	0	0	0	0	0	0	0	0	0	23	4185.36	4072.17	442.99	-2944.42	-523.908	1578.03	-3109.33	-1731.66	1045.46
0	0	0	0	0	0	0	0	0	0	0	0	0	0	0	0	0	0	0	0	0	0	0	744.184	0	0	0	0	0	0	0	0	0	0	0	0	0	0	0	0	24	7037.44	4884.36	4028.83	-3067.91	360.951	-4268.68	-4412.82	-3028.38	-7999.15
0	0	0	0	0	0	0	0	0	0	0	0	0	0	0	0	0	0	0	0	0	0	0	0	528.152	0	0	0	0	0	0	0	0	0	0	0	0	0	0	0	25	29.6629	-3133.01	2971.63	2043.57	1323.1	-1085.38	-3995.26	1211.58	-4578.38
0	0	0	0	0	0	0	0	0	0	0	0	0	0	0	0	0	0	0	0	0	0	0	0	0	809.621	0	0	0	0	0	0	0	0	0	0	0	0	0	0	26	1288.88	6548.69	4246.86	-117.516	-2199.22	-2200.22	319.383	-3872.84	-9719.14
0	0	0	0	0	0	0	0	0	0	0	0	0	0	0	0	0	0	0	0	0	0	0	0	0	0	209.401	0	0	0	0	0	0	0	0	0	0	0	0	0	27	-1449.39	1606.68	169.084	-1579.47	3683.17	1829.52	-1463.37	-1220.76	374.046
0	0	0	0	0	0	0	0	0	0	0	0	0	0	0	0	0	0	0	0	0	0	0	0	0	0	0	694.381	0	0	0	0	0	0	0	0	0	0	0	0	28	2368.61	3055.93	2704.23	989.096	-1638.79	1740.74	423.227	1800.17	-3170.13
0	0	0	0	0	0	0	0	0	0	0	0	0	0	0	0	0	0	0	0	0	0	0	0	0	0	0	0	53.7461	0	0	0	0	0	0	0	0	0	0	0	29	2376.16	4824.74	558.688	-1921.01	-3072.55	-1037.41	1890.55	-4219.21	1988.22
0	0	0	0	0	0	0	0	0	0	0	0	0	0	0	0	0	0	0	0	0	0	0	0	0	0	0	0	0	820.401	0	0	0	0	0	0	0	0	0	0	30	4328.95	3396.86	1858.78	-104.406	-3117.32	-6564.99	-4575.16	7626.76	528.15
0	0	0	0	0	0	0	0	0	0	0	0	0	0	0	0	0	0	0	0	0	0	0	0	0	0	0	0	0	0	694.855	0	0	0	0	0	0	0	0	0	31	-645.456	-1311	428.563	-598.762	650.802	-2682.87	-410.98	293.072	-1393.13
0	0	0	0	0	0	0	0	0	0	0	0	0	0	0	0	0	0	0	0	0	0	0	0	0	0	0	0	0	0	0	968.713	0	0	0	0	0	0	0	0	32	-174.083	-1235.87	-635.291	2170.25	1606.62	1704.11	713.14	1930.16	-2142.74
0	0	0	0	0	0	0	0	0	0	0	0	0	0	0	0	0	0	0	0	0	0	0	0	0	0	0	0	0	0	0	0	93.7564	0	0	0	0	0	0	0	33	-1478.01	-3507.42	-1610.31	1585.89	3196.25	2320.57	-1876.15	3352.67	-2385.8
0	0	0	0	0	0	0	0	0	0	0	0	0	0	0	0	0	0	0	0	0	0	0	0	0	0	0	0	0	0	0	0	0	930.241	0	0	0	0	0	0	34	4808.35	2140.87	-933.689	2968.15	-1513.32	1469.97	1431.88	2153.15	-228.841
0	0	0	0	0	0	0	0	0	0	0	0	0	0	0	0	0	0	0	0	0	0	0	0	0	0	0	0	0	0	0	0	0	0	522.192	0	0	0	0	0	35	-9.77594	-1542.18	591.895	-58.0683	-1742.34	-1002.86	-52.9555	-1438.37	-193.442
0	0	0	0	0	0	0	0	0	0	0	0	0	0	0	0	0	0	0	0	0	0	0	0	0	0	0	0	0	0	0	0	0	0	0	629.662	0	0	0	0	36	-654.458	-3367.93	56.7282	722.503	-2138.01	2156.4	2083.44	-633.275	-2205.6
0	0	0	0	0	0	0	0	0	0	0	0	0	0	0	0	0	0	0	0	0	0	0	0	0	0	0	0	0	0	0	0	0	0	0	0	323.658	0	0	0	37	982.347	704.979	-343.146	-582.113	982.618	237.39	-1753.04	-49.8598	23.3072
0	0	0	0	0	0	0	0	0	0	0	0	0	0	0	0	0	0	0	0	0	0	0	0	0	0	0	0	0	0	0	0	0	0	0	0	0	79.3481	0	0	38	1540.81	-1233.47	-565.503	1024.06	-202.086	956.525	-742.821	1351.63	-897.937
0	0	0	0	0	0	0	0	0	0	0	0	0	0	0	0	0	0	0	0	0	0	0	0	0	0	0	0	0	0	0	0	0	0	0	0	0	0	871.029	0	39	-1571.78	3686.12	690.19	-2792.9	1318.17	-1756.45	-360.641	-2294.73	2133.51
0	0	0	0	0	0	0	0	0	0	0	0	0	0	0	0	0	0	0	0	0	0	0	0	0	0	0	0	0	0	0	0	0	0	0	0	0	0	0	1024	40	-109.003	-566.44	5.7029	301.071	-230.858	204.145	290.315	168.51	-276.889
-1.5483	-1.6081	-2.3922	-0.2549	0.5771	0	0	0	0	0	0	0	0	0	0	0	0	0	0	0	0	0	0	0	0	0	0	0	0	0	0	0	0	0	0	0	0	0	0	0
0	3.16	0.5679	0.5469	-1.1809	0	0	0	0	0	0	0	0	0	0	0	0	0	0	0	0	0	0	0	0	0	0	0	0	0	0	0	0	0	0	0	0	0	0	0
0	0	1.2273	0.4253	0.8799	0	0	0	0	0	0	0	0	0	0	0	0	0	0	0	0	0	0	0	0	0	0	0	0	0	0	0	0	0	0	0	0	0	0	0
0	0	0	-0.6867	-0.0649	0	0	0	0	0	0	0	0	0	0	0	0	0	0	0	0	0	0	0	0	0	0	0	0	0	0	0	0	0	0	0	0	0	0	0
0	0	0	0	0.5847	0	0	0	0	0	0	0	0	0	0	0	0	0	0	0	0	0	0	0	0	0	0	0	0	0	0	0	0	0	0	0	0	0	0	0
0	0	0	0	0	0	0	0	0	0	0	0	0	0	0	0	0	0	0	0	0	0	0	0	0	0	0	0	0	0	0	0	0	0	0	0	0	0	0	0
0	0	0	0	0	0	0	0	0	0	0	0	0	0	0	0	0	0	0	0	0	0	0	0	0	0	0	0	0	0	0	0	0	0	0	0	0	0	0	0
0	0	0	0	0	0	0	0	0	0	0	0	0	0	0	0	0	0	0	0	0	0	0	0	0	0	0	0	0	0	0	0	0	0	0	0	0	0	0	0
0	0	0	0	0	0	0	0	0	0	0	0	0	0	0	0	0	0	0	0	0	0	0	0	0	0	0	0	0	0	0	0	0	0	0	0	0	0	0	0
0	0	0	0	0	0	0	0	0	0	0	0	0	0	0	0	0	0	0	0	0	0	0	0	0	0	0	0	0	0	0	0	0	0	0	0	0	0	0	0
1.72181	-0.714628	-0.448253	1.48538	-0.0718034	0.977028	0	0	0	0	0	0	0	0	0	0	0	0	0	0	0	0	0	0	0	0	0	0	0	0	0	0	0	0	0	0	0	0	0	0
0	2.41563	1.25287	-0.0877193	-0.700531	0.0729871	0	0	0	0	0	0	0	0	0	0	0	0	0	0	0	0	0	0	0	0	0	0	0	0	0	0	0	0	0	0	0	0	0	0
0	0	-1.66259	-1.02484	0.300073	-0.190063	0	0	0	0	0	0	0	0	0	0	0	0	0	0	0	0	0	0	0	0	0	0	0	0	0	0	0	0	0	0	0	0	0	0
0	0	0	-1.94216	0.342579	0.024811	0	0	0	0	0	0	0	0	0	0	0	0	0	0	0	0	0	0	0	0	0	0	0	0	0	0	0	0	0	0	0	0	0	0
0	0	0	0	2.72418	-1.11238	0	0	0	0	0	0	0	0	0	0	0	0	0	0	0	0	0	0	0	0	0	0	0	0	0	0	0	0	0	0	0	0	0	0
0	0	0	0	0	1.70906	0	0	0	0	0	0	0	0	0	0	0	0	0	0	0	0	0	0	0	0	0	0	0	0	0	0	0	0	0	0	0	0	0	0
0	0	0	0	0	0	0	0	0	0	0	0	0	0	0	0	0	0	0	0	0	0	0	0	0	0	0	0	0	0	0	0	0	0	0	0	0	0	0	0
-3.48716	-1.17916	-0.390114	0.547519	0.530752	-0.58843	-1.05478	0	0	0	0	0	0	0	0	0	0	0	0	0	0	0	0	0	0	0	0	0	0	0	0	0	0	0	0	0	0	0	0	0
0	2.67206	0.755985	0.053483	1.11532	-0.316407	-0.523759	0	0	0	0	0	0	0	0	0	0	0	0	0	0	0	0	0	0	0	0	0	0	0	0	0	0	0	0	0	0	0	0	0
0	0	2.80499	0.118594	-1.91763	0.731017	-0.572251	0	0	0	0	0	0	0	0	0	0	0	0	0	0	0	0	0	0	0	0	0	0	0	0	0	0	0	0	0	0	0	0	0
0	0	0	-1.74916	-0.556775	-1.07429	-0.720472	0	0	0	0	0	0	0	0	0	0	0	0	0	0	0	0	0	0	0	0	0	0	0	0	0	0	0	0	0	0	0	0	0
0	0	0	0	-2.73954	1.68145	-0.786586	0	0	0	0	0	0	0	0	0	0	0	0	0	0	0	0	0	0	0	0	0	0	0	0	0	0	0	0	0	0	0	0	0
0	0	0	0	0	1.29704	-0.0240614	0	0	0	0	0	0	0	0	0	0	0	0	0	0	0	0	0	0	0	0	0	0	0	0	0	0	0	0	0	0	0	0	0
0	0	0	0	0	0	1.50016	0	0	0	0	0	0	0	0	0	0	0	0	0	0	0	0	0	0	0	0	0	0	0	0	0	0	0	0	0	0	0	0	0
0	0	0	0	0	0	0	0	0	0	0	0	0	0	0	0	0	0	0	0	0	0	0	0	0	0	0	0	0	0	0	0	0	0	0	0	0	0	0	0
2.19785	0.021647	0.30098	0.199834	-0.633069	0.149726	0.275799	0.866207	0	0	0	0	0	0	0	0	0	0	0	0	0	0	0	0	0	0	0	0	0	0	0	0	0	0	0	0	0	0	0	0
0	-3.00622	-0.546059	-0.559781	0.686808	-0.670142	0.641907	0.120098	0	0	0	0	0	0	0	0	0	0	0	0	0	0	0	0	0	0	0	0	0	0	0	0	0	0	0	0	0	0	0	0
0	0	-2.02453	0.727985	-1.32606	-0.307562	0.674284	-0.234177	0	0	0	0	0	0	0	0	0	0	0	0	0	0	0	0	0	0	0	0	0	0	0	0	0	0	0	0	0	0	0	0
0	0	0	2.37793	-0.263264	-0.524984	0.00826742	-0.891536	0	0	0	0	0	0	0	0	0	0	0	0	0	0	0	0	0	0	0	0	0	0	0	0	0	0	0	0	0	0	0	0
0	0	0	0	-1.64186	-0.243647	-0.498412	1.29323	0	0	0	0	0	0	0	0	0	0	0	0	0	0	0	0	0	0	0	0	0	0	0	0	0	0	0	0	0	0	0	0
0	0	0	0	0	-1.4382	0.502436	-1.00616	0	0	0	0	0	0	0	0	0	0	0	0	0	0	0	0	0	0	0	0	0	0	0	0	0	0	0	0	0	0	0	0
0	0	0	0	0	0	1.31646	-0.231247	0	0	0	0	0	0	0	0	0	0	0	0	0	0	0	0	0	0	0	0	0	0	0	0	0	0	0	0	0	0	0	0
0	0	0	0	0	0	0	0.311969	0	0	0	0	0	0	0	0	0	0	0	0	0	0	0	0	0	0	0	0	0	0	0	0	0	0	0	0	0	0	0	0
0	0	0	0	0	0	0	0	0	0	0	0	0	0	0	0	0	0	0	0	0	0	0	0	0	0	0	0	0	0	0	0	0	0	0	0	0	0	0	0
-3.43929	-0.0675701	-1.80845	-0.158502	-0.220434	-1.11234	0.393422	-0.492611	0.247056	0	0	0	0	0	0	0	0	0	0	0	0	0	0	0	0	0	0	0	0	0	0	0	0	0	0	0	0	0	0	0
0	4.74302	1.14725	2.5216	0.509077	0.962602	-0.508096	0.253091	-1.50863	0	0	0	0	0	0	0	0	0	0	0	0	0	0	0	0	0	0	0	0	0	0	0	0	0	0	0	0	0	0	0
0	0	3.63468	0.846923	-0.335989	1.43341	-1.62081	0.835646	0.304187	0	0	0	0	0	0	0	0	0	0	0	0	0	0	0	0	0	0	0	0	0	0	0	0	0	0	0	0	0	0	0
0	0	0	-2.39562	-0.172265	0.505301	0.87203	-0.149325	0.0942558	0	0	0	0	0	0	0	0	0	0	0	0	0	0	0	0	0	0	0	0	0	0	0	0	0	0	0	0	0	0	0
0	0	0	0	-2.88955	0.828657	-1.01785	-0.0819762	-0.253006	0	0	0	0	0	0	0	0	0	0	0	0	0	0	0	0	0	0	0	0	0	0	0	0	0	0	0	0	0	0	0
0	0	0	0	0	2.54669	0.819775	-0.198946	0.139983	0	0	0	0	0	0	0	0	0	0	0	0	0	0	0	0	0	0	0	0	0	0	0	0	0	0	0	0	0	0	0
0	0	0	0	0	0	-2.34046	0.857831	0.37117	0	0	0	0	0	0	0	0	0	0	0	0	0	0	0	0	0	0	0	0	0	0	0	0	0	0	0	0	0	0	0
0	0	0	0	0	0	0	1.03908	0.843611	0	0	0	0	0	0	0	0	0	0	0	0	0	0	0	0	0	0	0	0	0	0	0	0	0	0	0	0	0	0	0
0	0	0	0	0	0	0	0	-0.307718	0	0	0	0	0	0	0	0	0	0	0	0	0	0	0	0	0	0	0	0	0	0	0	0	0	0	0	0	0	0	0
0	0	0	0	0	0	0	0	0	0	0	0	0	0	0	0	0	0	0	0	0	0	0	0	0	0	0	0	0	0	0	0	0	0	0	0	0	0	0	0
-3.31566	-1.14696	-0.208102	-0.624611	0.350333	-0.455057	-1.68707	-0.283344	0.299356	-0.995185	0	0	0	0	0	0	0	0	0	0	0	0	0	0	0	0	0	0	0	0	0	0	0	0	0	0	0	0	0	0
0	-3.32166	0.0598245	0.388775	0.168745	0.662613	-0.832465	-0.241137	0.0844429	0.189595	0	0	0	0	0	0	0	0	0	0	0	0	0	0	0	0	0	0	0	0	0	0	0	0	0	0	0	0	0	0
0	0	3.1177	0.531668	-0.0946008	0.619925	-1.32735	1.74857	0.0367647	-1.1457	0	0	0	0	0	0	0	0	0	0	0	0	0	0	0	0	0	0	0	0	0	0	0	0	0	0	0	0	0	0
0	0	0	1.34951	-0.304427	-0.169995	1.08805	0.250008	-0.545384	0.116591	0	0	0	0	0	0	0	0	0	0	0	0	0	0	0	0	0	0	0	0	0	0	0	0	0	0	0	0	0	0
0	0	0	0	-1.76629	0.423035	-0.113981	-0.495935	0.711673	1.49744	0	0	0	0	0	0	0	0	0	0	0	0	0	0	0	0	0	0	0	0	0	0	0	0	0	0	0	0	0	0
0	0	0	0	0	-1.07357	-2.18424	-0.0710812	-1.87744	0.180311	0	0	0	0	0	0	0	0	0	0	0	0	0	0	0	0	0	0	0	0	0	0	0	0	0	0	0	0	0	0
0	0	0	0	0	0	-1.60576	0.183537	0.639715	0.66713	0	0	0	0	0	0	0	0	0	0	0	0	0	0	0	0	0	0	0	0	0	0	0	0	0	0	0	0	0	0
0	0	0	0	0	0	0	-2.28131	-0.19162	0.206574	0	0	0	0	0	0	0	0	0	0	0	0	0	0	0	0	0	0	0	0	0	0	0	0	0	0	0	0	0	0
0	0	0	0	0	0	0	0	1.34001	-1.13559	0	0	0	0	0	0	0	0	0	0	0	0	0	0	0	0	0	0	0	0	0	0	0	0	0	0	0	0	0	0
0	0	0	0	0	0	0	0	0	0.756279	0	0	0	0	0	0	0	0	0	0	0	0	0	0	0	0	0	0	0	0	0	0	0	0	0	0	0	0	0	0
0	0	0	0	0	0	0	0	0	0	0	0	0	0	0	0	0	0	0	0	0	0	0	0	0	0	0	0	0	0	0	0	0	0	0	0	0	0	0	0
-2.37555	0.719331	-0.34669	0.411454	-0.518756	0.483285	1.32583	0.686804	0.400768	0.24457	0.85468	0	0	0	0	0	0	0	0	0	0	0	0	0	0	0	0	0	0	0	0	0	0	0	0	0	0	0	0	0
0	-3.02199	-0.094824	-0.220548	1.10652	0.276246	-0.484433	0.335246	0.396333	0.677872	0.428173	0	0	0	0	0	0	0	0	0	0	0	0	0	0	0	0	0	0	0	0	0	0	0	0	0	0	0	0	0
0	0	2.43644	-0.607186	0.482498	-0.0809759	1.2448	-0.992599	0.582909	-1.49853	0.18452	0	0	0	0	0	0	0	0	0	0	0	0	0	0	0	0	0	0	0	0	0	0	0	0	0	0	0	0	0
0	0	0	1.74768	0.102481	0.836828	-0.897638	3.2253	-0.606302	-0.589128	-0.377934	0	0	0	0	0	0	0	0	0	0	0	0	0	0	0	0	0	0	0	0	0	0	0	0	0	0	0	0	0
0	0	0	0	2.89802	-0.349524	0.252878	0.602363	-0.291308	0.228509	0.0831131	0	0	0	0	0	0	0	0	0	0	0	0	0	0	0	0	0	0	0	0	0	0	0	0	0	0	0	0	0
0	0	0	0	0	2.06308	-0.0593723	0.777208	0.112092	-0.0731602	1.35561	0	0	0	0	0	0	0	0	0	0	0	0	0	0	0	0	0	0	0	0	0	0	0	0	0	0	0	0	0
0	0	0	0	0	0	3.27831	0.346449	1.60471	-1.26719	1.72145	0	0	0	0	0	0	0	0	0	0	0	0	0	0	0	0	0	0	0	0	0	0	0	0	0	0	0	0	0
0	0	0	0	0	0	0	1.32502	-0.267009	-0.423332	-0.198751	0	0	0	0	0	0	0	0	0	0	0	0	0	0	0	0	0	0	0	0	0	0	0	0	0	0	0	0	0
0	0	0	0	0	0	0	0	-1.047	-1.66889	-0.0373612	0	0	0	0	0	0	0	0	0	0	0	0	0	0	0	0	0	0	0	0	0	0	0	0	0	0	0	0	0
0	0	0	0	0	0	0	0	0	-0.339386	0.0847109	0	0	0	0	0	0	0	0	0	0	0	0	0	0	0	0	0	0	0	0	0	0	0	0	0	0	0	0	0
0	0	0	0	0	0	0	0	0	0	0.785736	0	0	0	0	0	0	0	0	0	0	0	0	0	0	0	0	0	0	0	0	0	0	0	0	0	0	0	0	0
0	0	0	0	0	0	0	0	0	0	0	0	0	0	0	0	0	0	0	0	0	0	0	0	0	0	0	0	0	0	0	0	0	0	0	0	0	0	0	0
3.37793	1.00459	-0.481576	0.360816	-0.0830426	1.21962	0.269288	-2.20878	1.83454	0.393366	0.18542	0.307643	0	0	0	0	0	0	0	0	0	0	0	0	0	0	0	0	0	0	0	0	0	0	0	0	0	0	0	0
0	2.34008	-0.309595	0.00864545	0.304541	-0.117265	-0.556784	0.81784	1.45949	1.16726	-0.583288	1.49813	0	0	0	0	0	0	0	0	0	0	0	0	0	0	0	0	0	0	0	0	0	0	0	0	0	0	0	0
0	0	3.4682	-1.37962	0.742632	-0.917288	0.146822	1.83098	-0.193067	-0.588789	1.23731	0.888143	0	0	0	0	0	0	0	0	0	0	0	0	0	0	0	0	0	0	0	0	0	0	0	0	0	0	0	0
0	0	0	-2.51457	-1.19043	0.749247	-0.638541	-0.44698	-1.16722	-0.914337	-2.19719	-0.309417	0	0	0	0	0	0	0	0	0	0	0	0	0	0	0	0	0	0	0	0	0	0	0	0	0	0	0	0
0	0	0	0	3.97538	-0.558403	-2.28052	0.876149	1.05091	1.12724	-1.34002	1.72381	0	0	0	0	0	0	0	0	0	0	0	0	0	0	0	0	0	0	0	0	0	0	0	0	0	0	0	0
0	0	0	0	0	-3.52579	0.376636	0.759758	1.52556	0.0351943	0.281162	1.3309	0	0	0	0	0	0	0	0	0	0	0	0	0	0	0	0	0	0	0	0	0	0	0	0	0	0	0	0
0	0	0	0	0	0	-2.58698	0.208213	0.698521	1.58631	-0.943487	0.317235	0	0	0	0	0	0	0	0	0	0	0	0	0	0	0	0	0	0	0	0	0	0	0	0	0	0	0	0
0	0	0	0	0	0	0	-0.880277	0.813524	0.637493	-0.583497	2.46904	0	0	0	0	0	0	0	0	0	0	0	0	0	0	0	0	0	0	0	0	0	0	0	0	0	0	0	0
0	0	0	0	0	0	0	0	-1.97876	-0.0596886	0.855343	0.191518	0	0	0	0	0	0	0	0	0	0	0	0	0	0	0	0	0	0	0	0	0	0	0	0	0	0	0	0
0	0	0	0	0	0	0	0	0	1.0126	0.686382	0.538252	0	0	0	0	0	0	0	0	0	0	0	0	0	0	0	0	0	0	0	0	0	0	0	0	0	0	0	0
0	0	0	0	0	0	0	0	0	0	2.68741	1.05981	0	0	0	0	0	0	0	0	0	0	0	0	0	0	0	0	0	0	0	0	0	0	0	0	0	0	0	0
0	0	0	0	0	0	0	0	0	0	0	0.858405	0	0	0	0	0	0	0	0	0	0	0	0	0	0	0	0	0	0	0	0	0	0	0	0	0	0	0	0
0	0	0	0	0	0	0	0	0	0	0	0	0	0	0	0	0	0	0	0	0	0	0	0	0	0	0	0	0	0	0	0	0	0	0	0	0	0	0	0
4.56414	0.791395	0.539312	-0.25267	-0.577721	0.809713	-0.162793	1.02442	-0.940919	0.571424	-0.356686	0.402081	-0.057542	0	0	0	0	0	0	0	0	0	0	0	0	0	0	0	0	0	0	0	0	0	0	0	0	0	0	0
0	2.51548	2.48558	0.206223	-0.866584	-0.231683	-1.40509	0.889409	0.0308514	0.416578	0.502773	-1.69583	0.455256	0	0	0	0	0	0	0	0	0	0	0	0	0	0	0	0	0	0	0	0	0	0	0	0	0	0	0
0	0	2.51739	1.19888	-2.58695	-1.55879	0.46093	-0.228059	1.42789	0.451881	-0.268748	0.667388	-0.218499	0	0	0	0	0	0	0	0	0	0	0	0	0	0	0	0	0	0	0	0	0	0	0	0	0	0	0
0	0	0	-2.27483	2.18331	-0.649332	-0.724777	0.144616	0.316777	-0.248864	-0.609641	0.396954	-1.42302	0	0	0	0	0	0	0	0	0	0	0	0	0	0	0	0	0	0	0	0	0	0	0	0	0	0	0
0	0	0	0	3.67004	-0.235928	0.123412	0.890942	0.0935005	-1.01345	0.438125	1.05286	1.07693	0	0	0	0	0	0	0	0	0	0	0	0	0	0	0	0	0	0	0	0	0	0	0	0	0	0	0
0	0	0	0	0	-3.76684	-0.349195	0.0993023	-0.935025	1.74311	-0.756348	0.828476	-0.502893	0	0	0	0	0	0	0	0	0	0	0	0	0	0	0	0	0	0	0	0	0	0	0	0	0	0	0
0	0	0	0	0	0	-1.32738	0.801458	0.400185	0.490633	0.489215	-2.30609	0.293679	0	0	0	0	0	0	0	0	0	0	0	0	0	0	0	0	0	0	0	0	0	0	0	0	0	0	0
0	0	0	0	0	0	0	2.08583	1.04747	1.10459	0.0995948	-0.327964	-1.08464	0	0	0	0	0	0	0	0	0	0	0	0	0	0	0	0	0	0	0	0	0	0	0	0	0	0	0
0	0	0	0	0	0	0	0	2.73246	-0.288613	-0.911903	0.113851	1.65543	0	0	0	0	0	0	0	0	0	0	0	0	0	0	0	0	0	0	0	0	0	0	0	0	0	0	0
0	0	0	0	0	0	0	0	0	-1.39891	-0.275147	-0.775379	-0.261442	0	0	0	0	0	0	0	0	0	0	0	0	0	0	0	0	0	0	0	0	0	0	0	0	0	0	0
0	0	0	0	0	0	0	0	0	0	1.70088	0.529077	2.09897	0	0	0	0	0	0	0	0	0	0	0	0	0	0	0	0	0	0	0	0	0	0	0	0	0	0	0
0	0	0	0	0	0	0	0	0	0	0	-1.10236	-1.56163	0	0	0	0	0	0	0	0	0	0	0	0	0	0	0	0	0	0	0	0	0	0	0	0	0	0	0
0	0	0	0	0	0	0	0	0	0	0	0	0.401744	0	0	0	0	0	0	0	0	0	0	0	0	0	0	0	0	0	0	0	0	0	0	0	0	0	0	0
0	0	0	0	0	0	0	0	0	0	0	0	0	0	0	0	0	0	0	0	0	0	0	0	0	0	0	0	0	0	0	0	0	0	0	0	0	0	0	0
-4.13831	0.631262	1.28128	0.247678	0.2404	0.332458	-0.725833	-0.384151	0.579062	-0.373798	-2.31113	0.188962	1.0288	0.00261099	0	0	0	0	0	0	0	0	0	0	0	0	0	0	0	0	0	0	0	0	0	0	0	0	0	0
0	4.50805	-0.970073	0.224112	1.02961	-0.303805	1.43162	1.06086	-0.387536	-1.15637	1.26287	-1.26986	-0.183643	1.3363	0	0	0	0	0	0	0	0	0	0	0	0	0	0	0	0	0	0	0	0	0	0	0	0	0	0
0	0	-3.76423	-0.914229	0.261644	-1.43218	-2.07451	0.160339	1.7079	0.377967	-1.57502	-0.0726433	0.175392	0.292946	0	0	0	0	0	0	0	0	0	0	0	0	0	0	0	0	0	0	0	0	0	0	0	0	0	0
0	0	0	2.54993	-0.911278	-0.347116	-0.335183	1.629	0.327732	0.702292	0.0455248	0.00186269	-0.0866817	0.00901917	0	0	0	0	0	0	0	0	0	0	0	0	0	0	0	0	0	0	0	0	0	0	0	0	0	0
0	0	0	0	-4.14487	-2.03495	-0.801901	0.266924	-0.222068	2.29444	-1.05511	-0.00782889	0.980367	-1.13848	0	0	0	0	0	0	0	0	0	0	0	0	0	0	0	0	0	0	0	0	0	0	0	0	0	0
0	0	0	0	0	2.51025	-0.471638	-0.207519	-0.783914	-0.212436	-1.09901	-1.25021	-0.0693655	-1.33167	0	0	0	0	0	0	0	0	0	0	0	0	0	0	0	0	0	0	0	0	0	0	0	0	0	0
0	0	0	0	0	0	-3.44347	-0.355357	-0.75515	0.175674	-0.287963	0.387325	-0.225907	0.26021	0	0	0	0	0	0	0	0	0	0	0	0	0	0	0	0	0	0	0	0	0	0	0	0	0	0
0	0	0	0	0	0	0	2.63075	-0.201264	-0.78215	-1.33238	-0.613094	2.46761	0.202581	0	0	0	0	0	0	0	0	0	0	0	0	0	0	0	0	0	0	0	0	0	0	0	0	0	0
0	0	0	0	0	0	0	0	-1.93656	0.144237	-0.906919	0.911272	-0.97743	-0.526634	0	0	0	0	0	0	0	0	0	0	0	0	0	0	0	0	0	0	0	0	0	0	0	0	0	0
0	0	0	0	0	0	0	0	0	2.52781	1.51573	1.22239	-1.14004	0.757895	0	0	0	0	0	0	0	0	0	0	0	0	0	0	0	0	0	0	0	0	0	0	0	0	0	0
0	0	0	0	0	0	0	0	0	0	-1.53442	0.157445	-2.40413	1.74504	0	0	0	0	0	0	0	0	0	0	0	0	0	0	0	0	0	0	0	0	0	0	0	0	0	0
0	0	0	0	0	0	0	0	0	0	0	-1.23443	0.885175	0.0890415	0	0	0	0	0	0	0	0	0	0	0	0	0	0	0	0	0	0	0	0	0	0	0	0	0	0
0	0	0	0	0	0	0	0	0	0	0	0	-0.268771	-1.64067	0	0	0	0	0	0	0	0	0	0	0	0	0	0	0	0	0	0	0	0	0	0	0	0	0	0
0	0	0	0	0	0	0	0	0	0	0	0	0	-0.947561	0	0	0	0	0	0	0	0	0	0	0	0	0	0	0	0	0	0	0	0	0	0	0	0	0	0
0	0	0	0	0	0	0	0	0	0	0	0	0	0	0	0	0	0	0	0	0	0	0	0	0	0	0	0	0	0	0	0	0	0	0	0	0	0	0	0
3.97062	-0.635128	-1.22233	0.384771	0.15266	0.829627	-0.657446	1.07717	0.343786	1.92463	-0.306032	-1.29403	-0.605931	-0.896244	-0.72749	0	0	0	0	0	0	0	0	0	0	0	0	0	0	0	0	0	0	0	0	0	0	0	0	0
0	-4.07249	-2.21205	-0.701619	0.695059	-0.0247082	-1.85734	1.22716	0.973182	1.494	-0.96607	0.0942661	0.107533	-0.519638	0.111684	0	0	0	0	0	0	0	0	0	0	0	0	0	0	0	0	0	0	0	0	0	0	0	0	0
0	0	-3.91155	0.21038	1.65608	0.103772	0.938169	-1.34182	-0.472473	1.77667	-0.279596	-1.60939	1.08104	-0.446901	-1.02917	0	0	0	0	0	0	0	0	0	0	0	0	0	0	0	0	0	0	0	0	0	0	0	0	0
0	0	0	4.14993	-1.82624	0.22135	-0.557335	1.01728	0.359775	0.309234	0.208281	-1.20011	-1.40253	-1.4668	-0.419202	0	0	0	0	0	0	0	0	0	0	0	0	0	0	0	0	0	0	0	0	0	0	0	0	0
0	0	0	0	-4.28977	-0.625817	-0.37046	0.551527	-0.608284	0.225403	-0.0966769	0.97519	-1.945	0.260266	-0.476624	0	0	0	0	0	0	0	0	0	0	0	0	0	0	0	0	0	0	0	0	0	0	0	0	0
0	0	0	0	0	-2.2718	-1.24216	-0.482058	-1.15124	-0.737531	0.708628	-0.978284	1.48021	0.379513	1.94818	0	0	0	0	0	0	0	0	0	0	0	0	0	0	0	0	0	0	0	0	0	0	0	0	0
0	0	0	0	0	0	-2.95403	-0.546977	-0.560338	1.0337	0.515013	0.0864093	1.7479	1.18782	0.324198	0	0	0	0	0	0	0	0	0	0	0	0	0	0	0	0	0	0	0	0	0	0	0	0	0
0	0	0	0	0	0	0	-2.94679	1.93435	-0.38289	-0.223683	-0.757488	-0.00365236	0.429149	0.843452	0	0	0	0	0	0	0	0	0	0	0	0	0	0	0	0	0	0	0	0	0	0	0	0	0
0	0	0	0	0	0	0	0	-3.14279	0.175499	0.391123	0.739662	1.57914	0.229905	-0.225871	0	0	0	0	0	0	0	0	0	0	0	0	0	0	0	0	0	0	0	0	0	0	0	0	0
0	0	0	0	0	0	0	0	0	1.84194	-0.265405	-1.31305	1.94322	0.386499	-0.206691	0	0	0	0	0	0	0	0	0	0	0	0	0	0	0	0	0	0	0	0	0	0	0	0	0
0	0	0	0	0	0	0	0	0	0	1.82408	-1.08574	0.109189	-1.39271	0.615811	0	0	0	0	0	0	0	0	0	0	0	0	0	0	0	0	0	0	0	0	0	0	0	0	0
0	0	0	0	0	0	0	0	0	0	0	-1.09855	-0.0297657	-0.422418	0.211302	0	0	0	0	0	0	0	0	0	0	0	0	0	0	0	0	0	0	0	0	0	0	0	0	0
0	0	0	0	0	0	0	0	0	0	0	0	1.76141	-0.123882	-0.554471	0	0	0	0	0	0	0	0	0	0	0	0	0	0	0	0	0	0	0	0	0	0	0	0	0
0	0	0	0	0	0	0	0	0	0	0	0	0	-0.649931	-0.775254	0	0	0	0	0	0	0	0	0	0	0	0	0	0	0	0	0	0	0	0	0	0	0	0	0
0	0	0	0	0	0	0	0	0	0	0	0	0	0	-0.0482231	0	0	0	0	0	0	0	0	0	0	0	0	0	0	0	0	0	0	0	0	0	0	0	0	0
0	0	0	0	0	0	0	0	0	0	0	0	0	0	0	0	0	0	0	0	0	0	0	0	0	0	0	0	0	0	0	0	0	0	0	0	0	0	0	0
3.10211	-0.906284	1.48627	-0.463399	0.339076	0.416075	-1.47721	0.524861	-0.158111	0.785431	-1.07891	-1.00187	-1.6377	-0.428101	1.12932	-1.26147	0	0	0	0	0	0	0	0	0	0	0	0	0	0	0	0	0	0	0	0	0	0	0	0
0	-3.61993	1.07336	1.61417	-0.0493414	0.803992	-1.19975	0.0451801	0.565215	0.283273	1.76956	1.0964	-2.39943	2.00789	-0.385351	0.0440502	0	0	0	0	0	0	0	0	0	0	0	0	0	0	0	0	0	0	0	0	0	0	0	0
0	0	4.24636	-0.435545	1.63067	1.12056	-0.717144	0.116925	0.240526	0.286944	-1.40019	-0.171292	0.0508235	-0.591517	0.10365	-1.05444	0	0	0	0	0	0	0	0	0	0	0	0	0	0	0	0	0	0	0	0	0	0	0	0
0	0	0	-3.48046	-1.4649	1.33886	-0.392197	0.630636	0.231822	0.533873	0.611065	0.180263	-1.24293	0.166107	-0.494558	1.26239	0	0	0	0	0	0	0	0	0	0	0	0	0	0	0	0	0	0	0	0	0	0	0	0
0	0	0	0	-3.05619	0.237912	-0.317578	-1.37455	-1.49	1.19554	0.80603	-0.542183	-0.807165	-2.43896	0.805972	0.443226	0	0	0	0	0	0	0	0	0	0	0	0	0	0	0	0	0	0	0	0	0	0	0	0
0	0	0	0	0	2.77072	0.122001	0.274616	-1.17845	0.639693	1.30133	-0.196913	-0.202692	0.216299	0.948113	-2.36054	0	0	0	0	0	0	0	0	0	0	0	0	0	0	0	0	0	0	0	0	0	0	0	0
0	0	0	0	0	0	-2.92777	0.0176623	1.65549	0.92618	-0.00217528	0.678657	-0.586156	0.413037	0.771208	-1.24824	0	0	0	0	0	0	0	0	0	0	0	0	0	0	0	0	0	0	0	0	0	0	0	0
0	0	0	0	0	0	0	-2.44023	1.49549	-0.670467	-0.766902	0.151391	-2.56856	0.389586	-0.0081336	-0.99558	0	0	0	0	0	0	0	0	0	0	0	0	0	0	0	0	0	0	0	0	0	0	0	0
0	0	0	0	0	0	0	0	4.05918	1.39904	0.420494	-0.499693	-0.0668121	1.56595	0.423616	-0.0468301	0	0	0	0	0	0	0	0	0	0	0	0	0	0	0	0	0	0	0	0	0	0	0	0
0	0	0	0	0	0	0	0	0	1.55236	1.67849	0.212347	-0.331484	0.669844	-1.1876	0.558475	0	0	0	0	0	0	0	0	0	0	0	0	0	0	0	0	0	0	0	0	0	0	0	0
0	0	0	0	0	0	0	0	0	0	-1.94148	1.74397	0.831848	-0.749825	-0.872299	1.29793	0	0	0	0	0	0	0	0	0	0	0	0	0	0	0	0	0	0	0	0	0	0	0	0
0	0	0	0	0	0	0	0	0	0	0	2.23608	-1.46216	-1.0643	0.708848	-0.00901627	0	0	0	0	0	0	0	0	0	0	0	0	0	0	0	0	0	0	0	0	0	0	0	0
0	0	0	0	0	0	0	0	0	0	0	0	-1.53632	0.114284	0.491218	-0.144847	0	0	0	0	0	0	0	0	0	0	0	0	0	0	0	0	0	0	0	0	0	0	0	0
0	0	0	0	0	0	0	0	0	0	0	0	0	-1.62863	-0.79773	0.328533	0	0	0	0	0	0	0	0	0	0	0	0	0	0	0	0	0	0	0	0	0	0	0	0
0	0	0	0	0	0	0	0	0	0	0	0	0	0	-1.84212	-0.891167	0	0	0	0	0	0	0	0	0	0	0	0	0	0	0	0	0	0	0	0	0	0	0	0
0	0	0	0	0	0	0	0	0	0	0	0	0	0	0	1.53598	0	0	0	0	0	0	0	0	0	0	0	0	0	0	0	0	0	0	0	0	0	0	0	0
0	0	0	0	0	0	0	0	0	0	0	0	0	0	0	0	0	0	0	0	0	0	0	0	0	0	0	0	0	0	0	0	0	0	0	0	0	0	0	0
-4.21845	-0.617318	0.924398	0.158244	-1.136	-0.803704	-1.71731	-1.6154	0.87573	-0.18943	1.35603	-0.545833	1.44233	0.828438	0.961569	-0.225981	0.0879501	0	0	0	0	0	0	0	0	0	0	0	0	0	0	0	0	0	0	0	0	0	0	0
0	-3.67429	-2.07326	-1.60569	0.460566	0.0740979	-1.92938	0.0487755	0.674654	0.466287	-0.116233	0.549546	1.35444	0.430558	0.891806	0.376475	-1.44063	0	0	0	0	0	0	0	0	0	0	0	0	0	0	0	0	0	0	0	0	0	0	0
0	0	-3.88292	-0.996509	0.66431	-0.32333	0.0440404	-2.14523	-1.04345	0.940718	-0.588261	-0.288183	0.856077	0.656295	-0.175279	1.93588	-1.34817	0	0	0	0	0	0	0	0	0	0	0	0	0	0	0	0	0	0	0	0	0	0	0
0	0	0	3.16103	1.62424	0.173735	1.95203	-1.20536	1.00021	-0.45803	1.80531	-0.478962	-0.530255	-0.192645	-0.41333	1.81898	0.0295309	0	0	0	0	0	0	0	0	0	0	0	0	0	0	0	0	0	0	0	0	0	0	0
0	0	0	0	-3.36576	-0.226399	0.523091	-0.689865	0.532936	0.035916	-0.191556	0.860045	0.347597	0.597894	-0.10787	-0.834081	-0.882864	0	0	0	0	0	0	0	0	0	0	0	0	0	0	0	0	0	0	0	0	0	0	0
0	0	0	0	0	3.25588	-2.15175	-1.51833	0.367271	1.23092	0.404901	0.964921	1.65563	0.0805473	-0.645657	1.46824	0.789982	0	0	0	0	0	0	0	0	0	0	0	0	0	0	0	0	0	0	0	0	0	0	0
0	0	0	0	0	0	2.07825	-0.724131	-0.150048	-0.180221	2.13959	-0.383851	-0.129009	-0.744779	1.4784	-0.410733	-0.213275	0	0	0	0	0	0	0	0	0	0	0	0	0	0	0	0	0	0	0	0	0	0	0
0	0	0	0	0	0	0	-5.36681	-0.356342	-0.152318	0.571297	0.0888247	-1.3847	1.3353	0.469782	-0.467457	-1.86638	0	0	0	0	0	0	0	0	0	0	0	0	0	0	0	0	0	0	0	0	0	0	0
0	0	0	0	0	0	0	0	-3.2745	-0.315569	2.45342	-0.160897	-1.07383	0.570166	-1.11609	-0.888372	-1.28747	0	0	0	0	0	0	0	0	0	0	0	0	0	0	0	0	0	0	0	0	0	0	0
0	0	0	0	0	0	0	0	0	3.72394	-0.204099	0.0977065	-1.3303	1.52625	0.857167	0.0475898	0.348584	0	0	0	0	0	0	0	0	0	0	0	0	0	0	0	0	0	0	0	0	0	0	0
0	0	0	0	0	0	0	0	0	0	2.48294	0.156535	0.35688	0.00982392	-1.24188	-1.67611	0.583139	0	0	0	0	0	0	0	0	0	0	0	0	0	0	0	0	0	0	0	0	0	0	0
0	0	0	0	0	0	0	0	0	0	0	2.11814	0.234999	-1.57477	-0.500319	-1.72439	-0.858697	0	0	0	0	0	0	0	0	0	0	0	0	0	0	0	0	0	0	0	0	0	0	0
0	0	0	0	0	0	0	0	0	0	0	0	1.09119	1.10264	0.78965	0.120527	0.970875	0	0	0	0	0	0	0	0	0	0	0	0	0	0	0	0	0	0	0	0	0	0	0
0	0	0	0	0	0	0	0	0	0	0	0	0	-2.94256	-0.116089	0.149308	0.355988	0	0	0	0	0	0	0	0	0	0	0	0	0	0	0	0	0	0	0	0	0	0	0
0	0	0	0	0	0	0	0	0	0	0	0	0	0	1.58366	0.812258	0.30137	0	0	0	0	0	0	0	0	0	0	0	0	0	0	0	0	0	0	0	0	0	0	0
0	0	0	0	0	0	0	0	0	0	0	0	0	0	0	-1.34886	1.24093	0	0	0	0	0	0	0	0	0	0	0	0	0	0	0	0	0	0	0	0	0	0	0
0	0	0	0	0	0	0	0	0	0	0	0	0	0	0	0	0.219644	0	0	0	0	0	0	0	0	0	0	0	0	0	0	0	0	0	0	0	0	0	0	0
0	0	0	0	0	0	0	0	0	0	0	0	0	0	0	0	0	0	0	0	0	0	0	0	0	0	0	0	0	0	0	0	0	0	0	0	0	0	0	0
5.27206	-1.53314	-0.433785	-0.0658801	-0.0935008	-0.123236	1.47816	-0.932101	0.12163	1.15165	1.22147	-1.38411	-0.913517	-1.15565	-0.501206	-0.383584	-2.91105	1.97646	0	0	0	0	0	0	0	0	0	0	0	0	0	0	0	0	0	0	0	0	0	0
0	4.36773	-0.595424	0.387119	1.44168	-0.304844	-1.37702	0.126581	1.44765	-0.00863082	0.419209	-1.7186	0.191622	-1.40668	-0.497812	0.863897	0.932205	0.300266	0	0	0	0	0	0	0	0	0	0	0	0	0	0	0	0	0	0	0	0	0	0
0	0	4.27419	-1.05163	0.351309	-0.70829	-0.508214	-0.140605	1.56281	-0.600546	0.487479	0.816571	-1.5713	-0.210734	0.745144	0.45344	-0.702475	0.641439	0	0	0	0	0	0	0	0	0	0	0	0	0	0	0	0	0	0	0	0	0	0
0	0	0	2.44468	1.78051	0.743365	0.381997	0.0465985	0.0760412	0.493674	0.236317	-1.35724	1.94737	-1.47101	2.13051	-1.03525	-0.85284	-0.188805	0	0	0	0	0	0	0	0	0	0	0	0	0	0	0	0	0	0	0	0	0	0
0	0	0	0	-3.76617	-3.13743	0.740355	-0.739846	-1.75458	-0.512239	0.0798084	-0.932456	-0.0424933	-1.13121	1.40245	0.23473	0.784387	-0.50545	0	0	0	0	0	0	0	0	0	0	0	0	0	0	0	0	0	0	0	0	0	0
0	0	0	0	0	4.15201	-0.70078	0.78273	1.54039	0.632088	-0.883668	-0.63052	0.839236	-0.661389	0.0808424	-1.48289	-0.376101	0.83408	0	0	0	0	0	0	0	0	0	0	0	0	0	0	0	0	0	0	0	0	0	0
0	0	0	0	0	0	-3.68066	0.693087	-1.39138	0.151959	0.651355	-0.541586	0.230597	-0.32992	-0.153796	-0.638704	0.889225	0.79197	0	0	0	0	0	0	0	0	0	0	0	0	0	0	0	0	0	0	0	0	0	0
0	0	0	0	0	0	0	-3.86904	0.29422	-1.46299	0.980054	-0.300014	-0.236121	1.17041	-1.24978	1.74897	1.08653	0.842618	0	0	0	0	0	0	0	0	0	0	0	0	0	0	0	0	0	0	0	0	0	0
0	0	0	0	0	0	0	0	-3.15049	0.901073	-0.185264	-0.974962	-1.55726	0.505533	-0.042922	-0.622523	-1.11613	0.0731475	0	0	0	0	0	0	0	0	0	0	0	0	0	0	0	0	0	0	0	0	0	0
0	0	0	0	0	0	0	0	0	3.42799	-0.100277	1.79149	-0.106592	-0.643945	-1.27939	1.68607	-1.74852	0.13597	0	0	0	0	0	0	0	0	0	0	0	0	0	0	0	0	0	0	0	0	0	0
0	0	0	0	0	0	0	0	0	0	-2.61029	-1.03933	-0.688578	0.323801	1.42416	1.04932	1.42299	-0.556629	0	0	0	0	0	0	0	0	0	0	0	0	0	0	0	0	0	0	0	0	0	0
0	0	0	0	0	0	0	0	0	0	0	3.46057	-0.277504	-1.01618	-0.804905	-0.379031	-0.65857	0.757797	0	0	0	0	0	0	0	0	0	0	0	0	0	0	0	0	0	0	0	0	0	0
0	0	0	0	0	0	0	0	0	0	0	0	-3.27567	-0.301093	-3.77345	-3.88508	-0.992648	-0.291809	0	0	0	0	0	0	0	0	0	0	0	0	0	0	0	0	0	0	0	0	0	0
0	0	0	0	0	0	0	0	0	0	0	0	0	2.03647	2.16815	0.631505	-0.682644	-2.1873	0	0	0	0	0	0	0	0	0	0	0	0	0	0	0	0	0	0	0	0	0	0
0	0	0	0	0	0	0	0	0	0	0	0	0	0	-1.02095	0.840232	-0.534586	-1.80085	0	0	0	0	0	0	0	0	0	0	0	0	0	0	0	0	0	0	0	0	0	0
0	0	0	0	0	0	0	0	0	0	0	0	0	0	0	0.900313	1.23377	0.472296	0	0	0	0	0	0	0	0	0	0	0	0	0	0	0	0	0	0	0	0	0	0
0	0	0	0	0	0	0	0	0	0	0	0	0	0	0	0	0.976826	-0.722743	0	0	0	0	0	0	0	0	0	0	0	0	0	0	0	0	0	0	0	0	0	0
0	0	0	0	0	0	0	0	0	0	0	0	0	0	0	0	0	-0.516962	0	0	0	0	0	0	0	0	0	0	0	0	0	0	0	0	0	0	0	0	0	0
0	0	0	0	0	0	0	0	0	0	0	0	0	0	0	0	0	0	0	0	0	0	0	0	0	0	0	0	0	0	0	0	0	0	0	0	0	0	0	0
-4.47653	-0.452415	2.17022	-1.07863	-1.20537	0.0622941	-0.228762	-0.463998	1.6167	1.04851	-0.228969	0.549907	-0.153111	0.131876	-0.436475	1.31482	1.04431	0.0925685	0.301811	0	0	0	0	0	0	0	0	0	0	0	0	0	0	0	0	0	0	0	0	0
0	2.3992	-0.344018	-0.232679	0.287534	-0.825382	1.77357	-0.31987	-0.612993	-0.00497439	1.80497	-1.54594	1.56494	1.29244	-0.252742	-0.340605	0.184708	0.388234	-1.03336	0	0	0	0	0	0	0	0	0	0	0	0	0	0	0	0	0	0	0	0	0
0	0	4.69192	1.15463	0.730048	0.0868109	-0.175591	0.188431	-0.205427	-0.941915	1.60877	-0.159937	1.3555	-0.402059	1.70303	-1.12463	-1.98806	2.83708	-0.213436	0	0	0	0	0	0	0	0	0	0	0	0	0	0	0	0	0	0	0	0	0
0	0	0	-4.09383	-0.00513914	1.1917	0.487305	0.630906	0.887507	-0.114468	-1.42645	0.600683	0.272296	0.424247	-0.945441	-0.40478	-0.160622	0.355369	-2.31795	0	0	0	0	0	0	0	0	0	0	0	0	0	0	0	0	0	0	0	0	0
0	0	0	0	3.94251	-0.528277	-0.606233	-1.10931	-1.09591	-0.538319	-1.37751	-0.66966	-0.624477	2.05099	0.469685	-0.0882828	-0.85435	2.7639	-1.25476	0	0	0	0	0	0	0	0	0	0	0	0	0	0	0	0	0	0	0	0	0
0	0	0	0	0	4.96946	-0.178656	-0.326342	0.0536464	-1.03637	0.206686	0.934492	0.141907	-0.0653103	1.6121	0.828664	1.67607	-1.20068	-0.220331	0	0	0	0	0	0	0	0	0	0	0	0	0	0	0	0	0	0	0	0	0
0	0	0	0	0	0	4.28235	-0.92243	0.721661	-0.710087	-0.125095	1.60549	-0.632456	1.13253	-2.01833	-0.371605	0.663225	0.60082	0.868354	0	0	0	0	0	0	0	0	0	0	0	0	0	0	0	0	0	0	0	0	0
0	0	0	0	0	0	0	-4.57486	0.79967	-0.21313	-1.11342	-0.431779	0.0596597	1.5421	0.524977	1.38964	-0.385149	-0.891345	0.285693	0	0	0	0	0	0	0	0	0	0	0	0	0	0	0	0	0	0	0	0	0
0	0	0	0	0	0	0	0	-4.12226	-2.37079	-2.10464	0.645503	0.815851	-1.01655	1.07042	0.0169987	-0.995107	0.102077	-0.556104	0	0	0	0	0	0	0	0	0	0	0	0	0	0	0	0	0	0	0	0	0
0	0	0	0	0	0	0	0	0	3.25946	-1.31188	0.579742	-0.964512	-1.4511	-0.0424861	-0.411952	-0.541536	0.7542	0.198343	0	0	0	0	0	0	0	0	0	0	0	0	0	0	0	0	0	0	0	0	0
0	0	0	0	0	0	0	0	0	0	4.34212	0.789457	1.22938	0.107675	0.191435	-1.47354	2.36559	0.174613	-0.490102	0	0	0	0	0	0	0	0	0	0	0	0	0	0	0	0	0	0	0	0	0
0	0	0	0	0	0	0	0	0	0	0	-1.80762	1.21122	1.03668	0.286641	-1.01081	-1.78398	0.473052	0.405625	0	0	0	0	0	0	0	0	0	0	0	0	0	0	0	0	0	0	0	0	0
0	0	0	0	0	0	0	0	0	0	0	0	1.40206	-0.179953	-0.653594	0.20992	-1.19229	0.0224768	-0.348939	0	0	0	0	0	0	0	0	0	0	0	0	0	0	0	0	0	0	0	0	0
0	0	0	0	0	0	0	0	0	0	0	0	0	3.3057	1.88057	-1.31284	-1.63874	0.266115	0.472073	0	0	0	0	0	0	0	0	0	0	0	0	0	0	0	0	0	0	0	0	0
0	0	0	0	0	0	0	0	0	0	0	0	0	0	-1.68435	0.187197	0.693167	-1.54805	-2.18676	0	0	0	0	0	0	0	0	0	0	0	0	0	0	0	0	0	0	0	0	0
0	0	0	0	0	0	0	0	0	0	0	0	0	0	0	-0.902122	-0.552392	0.372264	-0.43422	0	0	0	0	0	0	0	0	0	0	0	0	0	0	0	0	0	0	0	0	0
0	0	0	0	0	0	0	0	0	0	0	0	0	0	0	0	1.14193	0.509784	0.887588	0	0	0	0	0	0	0	0	0	0	0	0	0	0	0	0	0	0	0	0	0
0	0	0	0	0	0	0	0	0	0	0	0	0	0	0	0	0	1.06056	-0.080019	0	0	0	0	0	0	0	0	0	0	0	0	0	0	0	0	0	0	0	0	0
0	0	0	0	0	0	0	0	0	0	0	0	0	0	0	0	0	0	-0.238916	0	0	0	0	0	0	0	0	0	0	0	0	0	0	0	0	0	0	0	0	0
0	0	0	0	0	0	0	0	0	0	0	0	0	0	0	0	0	0	0	0	0	0	0	0	0	0	0	0	0	0	0	0	0	0	0	0	0	0	0	0
3.81437	-0.187603	1.57348	-1.22282	-1.19664	1.06958	1.53278	0.346725	0.556007	-0.1181	1.2716	-0.812925	1.28097	-0.647813	0.649519	-1.68329	0.138531	1.14439	2.0144	0.094325	0	0	0	0	0	0	0	0	0	0	0	0	0	0	0	0	0	0	0	0
0	4.26858	0.281422	-0.124646	0.348426	-1.72778	-2.23226	0.249521	0.736502	0.0584004	-2.15092	-1.76036	0.0304837	1.66687	-1.56419	-1.56766	-0.90506	-0.910254	0.273866	0.977117	0	0	0	0	0	0	0	0	0	0	0	0	0	0	0	0	0	0	0	0
0	0	3.54886	1.39503	0.00541649	-0.591324	-0.00646773	0.196589	0.264976	-1.08673	0.782747	0.653313	-0.472906	-0.467174	1.67706	0.0397636	-0.130503	-1.06778	1.39034	-0.461582	0	0	0	0	0	0	0	0	0	0	0	0	0	0	0	0	0	0	0	0
0	0	0	-3.89928	1.26928	-0.559665	-0.0989143	1.38979	-0.340821	0.0827095	-1.33944	-0.46109	-1.51953	1.93355	-1.76965	0.942562	0.824903	-0.645458	1.84348	-0.859787	0	0	0	0	0	0	0	0	0	0	0	0	0	0	0	0	0	0	0	0
0	0	0	0	4.74012	-0.455311	0.038075	0.77196	-0.277774	0.946156	-0.0309448	-1.03473	-0.891338	0.930407	-1.68785	0.634226	0.66528	1.83229	-1.68416	1.31221	0	0	0	0	0	0	0	0	0	0	0	0	0	0	0	0	0	0	0	0
0	0	0	0	0	3.76768	-1.1715	0.481071	0.94057	1.00758	-1.01651	1.27336	-1.9661	1.10536	-0.281081	0.828109	0.403066	-0.323646	-0.984906	-0.492335	0	0	0	0	0	0	0	0	0	0	0	0	0	0	0	0	0	0	0	0
0	0	0	0	0	0	-5.04123	0.355226	0.0222498	0.433709	0.4151	-0.408617	-0.504068	0.597106	-0.24404	0.190727	-0.028926	-0.260428	0.982813	-0.383598	0	0	0	0	0	0	0	0	0	0	0	0	0	0	0	0	0	0	0	0
0	0	0	0	0	0	0	3.34927	0.263838	0.651279	1.36065	0.609637	0.287133	1.9254	-0.0478167	-0.802876	-0.894724	-1.72386	-0.357578	-0.836866	0	0	0	0	0	0	0	0	0	0	0	0	0	0	0	0	0	0	0	0
0	0	0	0	0	0	0	0	-2.69174	1.27885	-0.690616	-0.525107	-0.514206	0.172624	-2.10851	0.846732	0.646308	0.203296	-1.14724	-0.389135	0	0	0	0	0	0	0	0	0	0	0	0	0	0	0	0	0	0	0	0
0	0	0	0	0	0	0	0	0	-4.85552	-1.57306	-0.359275	-0.553056	-1.32339	1.85765	-0.216762	0.362725	-1.20833	1.59648	-0.505308	0	0	0	0	0	0	0	0	0	0	0	0	0	0	0	0	0	0	0	0
0	0	0	0	0	0	0	0	0	0	-2.56634	-0.366263	-0.6138	0.283483	-0.651964	-0.708125	0.459688	-0.0102101	-0.374534	-1.39865	0	0	0	0	0	0	0	0	0	0	0	0	0	0	0	0	0	0	0	0
0	0	0	0	0	0	0	0	0	0	0	-2.02441	0.619547	-0.0257851	-0.154693	1.0718	-0.597884	0.123928	0.372546	-0.214608	0	0	0	0	0	0	0	0	0	0	0	0	0	0	0	0	0	0	0	0
0	0	0	0	0	0	0	0	0	0	0	0	-2.05703	2.30256	1.242	-1.1387	-0.83592	-0.0476903	-0.325512	-0.22855	0	0	0	0	0	0	0	0	0	0	0	0	0	0	0	0	0	0	0	0
0	0	0	0	0	0	0	0	0	0	0	0	0	-2.03718	-0.0766033	0.810857	-1.12398	-0.15851	0.192484	-0.730342	0	0	0	0	0	0	0	0	0	0	0	0	0	0	0	0	0	0	0	0
0	0	0	0	0	0	0	0	0	0	0	0	0	0	2.3001	-0.280855	-1.63426	0.166469	0.493538	1.02832	0	0	0	0	0	0	0	0	0	0	0	0	0	0	0	0	0	0	0	0
0	0	0	0	0	0	0	0	0	0	0	0	0	0	0	-1.21249	-2.06092	0.435105	-0.609469	-0.711346	0	0	0	0	0	0	0	0	0	0	0	0	0	0	0	0	0	0	0	0
0	0	0	0	0	0	0	0	0	0	0	0	0	0	0	0	0.630416	-1.79973	0.415367	-0.0686519	0	0	0	0	0	0	0	0	0	0	0	0	0	0	0	0	0	0	0	0
0	0	0	0	0	0	0	0	0	0	0	0	0	0	0	0	0	1.21993	-1.21674	1.5821	0	0	0	0	0	0	0	0	0	0	0	0	0	0	0	0	0	0	0	0
0	0	0	0	0	0	0	0	0	0	0	0	0	0	0	0	0	0	-1.73457	0.52557	0	0	0	0	0	0	0	0	0	0	0	0	0	0	0	0	0	0	0	0
0	0	0	0	0	0	0	0	0	0	0	0	0	0	0	0	0	0	0	-0.325738	0	0	0	0	0	0	0	0	0	0	0	0	0	0	0	0	0	0	0	0
0	0	0	0	0	0	0	0	0	0	0	0	0	0	0	0	0	0	0	0	0	0	0	0	0	0	0	0	0	0	0	0	0	0	0	0	0	0	0	0
3.99596	-1.54169	1.76195	-1.60046	0.0906935	0.445204	0.818099	-0.675512	-0.633442	-1.77287	-0.874042	1.03765	-1.14354	-0.495579	-0.606794	-0.152315	0.746646	0.139658	0.0611445	0.0610231	1.35355	0	0	0	0	0	0	0	0	0	0	0	0	0	0	0	0	0	0	0
0	-4.45277	1.98057	-0.956102	-0.233742	0.223959	0.437984	0.686374	-0.522194	-0.521173	-0.613956	0.415145	1.22981	0.582192	1.39777	-1.9182	-0.377177	0.767895	1.35081	-0.335496	0.330416	0	0	0	0	0	0	0	0	0	0	0	0	0	0	0	0	0	0	0
0	0	4.5241	0.577857	0.880579	-0.439287	0.570841	0.835963	0.277455	0.85555	0.261032	-0.827394	0.456768	-0.270876	-0.426492	1.2345	0.247277	0.814898	-0.744889	1.37434	1.65391	0	0	0	0	0	0	0	0	0	0	0	0	0	0	0	0	0	0	0
0	0	0	-4.54328	0.364227	-2.12922	-1.16156	0.0574472	-0.728316	2.02116	1.15793	1.60815	0.709871	0.264096	-0.818434	0.973095	0.530817	1.85305	0.917417	0.712237	-0.814526	0	0	0	0	0	0	0	0	0	0	0	0	0	0	0	0	0	0	0
0	0	0	0	-3.45629	-1.99843	0.454391	0.372259	-0.804245	-0.516716	0.936146	0.409455	1.10956	-1.26116	-0.701825	0.972543	-1.8221	1.1789	1.13622	-0.0509523	0.191098	0	0	0	0	0	0	0	0	0	0	0	0	0	0	0	0	0	0	0
0	0	0	0	0	3.12162	0.124222	1.10102	-1.71308	-2.46665	1.7235	-1.60814	-0.809148	0.652354	1.46401	0.481635	1.30673	1.05753	0.702306	-1.58365	0.734119	0	0	0	0	0	0	0	0	0	0	0	0	0	0	0	0	0	0	0
0	0	0	0	0	0	3.55319	1.01669	-0.453322	-2.08601	1.30354	-1.96239	-0.9315	-1.54701	-1.05998	1.36059	-2.4246	0.426584	1.52351	-0.461601	0.756461	0	0	0	0	0	0	0	0	0	0	0	0	0	0	0	0	0	0	0
0	0	0	0	0	0	0	-3.90992	0.278615	0.397816	0.678804	-1.57927	0.325446	-0.446143	0.195026	-1.16369	-0.584937	-0.711131	-0.78841	-0.475781	0.527127	0	0	0	0	0	0	0	0	0	0	0	0	0	0	0	0	0	0	0
0	0	0	0	0	0	0	0	-3.78429	-1.39816	0.228417	1.82893	1.80542	0.205951	0.155516	-1.24508	0.520749	-0.529786	1.2082	-0.514296	-0.726729	0	0	0	0	0	0	0	0	0	0	0	0	0	0	0	0	0	0	0
0	0	0	0	0	0	0	0	0	-3.76408	-0.292544	-0.675975	-1.35547	0.603411	-1.44141	1.56479	0.15674	-2.33505	-0.067463	1.9073	-0.277528	0	0	0	0	0	0	0	0	0	0	0	0	0	0	0	0	0	0	0
0	0	0	0	0	0	0	0	0	0	4.68196	1.21846	-0.439948	0.6108	0.952614	0.172587	-1.12076	-0.945294	-1.2098	1.20485	1.59945	0	0	0	0	0	0	0	0	0	0	0	0	0	0	0	0	0	0	0
0	0	0	0	0	0	0	0	0	0	0	-2.63126	1.1822	-0.930331	0.530402	-0.27454	0.863036	-0.403576	-0.716891	-0.71642	-0.196177	0	0	0	0	0	0	0	0	0	0	0	0	0	0	0	0	0	0	0
0	0	0	0	0	0	0	0	0	0	0	0	2.23867	-1.82514	-1.00004	-0.0674519	1.17632	-0.698478	-1.3299	-0.688131	0.68093	0	0	0	0	0	0	0	0	0	0	0	0	0	0	0	0	0	0	0
0	0	0	0	0	0	0	0	0	0	0	0	0	-2.79803	-0.544842	1.44054	0.201559	0.760504	-0.1354	0.859184	-0.708285	0	0	0	0	0	0	0	0	0	0	0	0	0	0	0	0	0	0	0
0	0	0	0	0	0	0	0	0	0	0	0	0	0	1.89655	0.233631	-0.723482	-0.377763	-0.33037	0.327474	0.936305	0	0	0	0	0	0	0	0	0	0	0	0	0	0	0	0	0	0	0
0	0	0	0	0	0	0	0	0	0	0	0	0	0	0	1.62933	0.428437	-0.420481	0.808801	0.626844	-0.598568	0	0	0	0	0	0	0	0	0	0	0	0	0	0	0	0	0	0	0
0	0	0	0	0	0	0	0	0	0	0	0	0	0	0	0	-1.42176	-0.734614	1.11723	2.25287	1.12861	0	0	0	0	0	0	0	0	0	0	0	0	0	0	0	0	0	0	0
0	0	0	0	0	0	0	0	0	0	0	0	0	0	0	0	0	-1.03451	-1.75879	0.5239	0.211624	0	0	0	0	0	0	0	0	0	0	0	0	0	0	0	0	0	0	0
0	0	0	0	0	0	0	0	0	0	0	0	0	0	0	0	0	0	1.51222	0.653179	1.21251	0	0	0	0	0	0	0	0	0	0	0	0	0	0	0	0	0	0	0
0	0	0	0	0	0	0	0	0	0	0	0	0	0	0	0	0	0	0	-0.396366	-0.925958	0	0	0	0	0	0	0	0	0	0	0	0	0	0	0	0	0	0	0
0	0	0	0	0	0	0	0	0	0	0	0	0	0	0	0	0	0	0	0	0.844304	0	0	0	0	0	0	0	0	0	0	0	0	0	0	0	0	0	0	0
0	0	0	0	0	0	0	0	0	0	0	0	0	0	0	0	0	0	0	0	0	0	0	0	0	0	0	0	0	0	0	0	0	0	0	0	0	0	0	0
4.41836	-2.9697	0.454728	1.68597	0.509959	-0.0160435	0.132314	-0.128522	0.0503995	0.54506	0.691462	0.501874	-3.05194	0.449723	0.825267	-0.970591	1.73925	-0.520238	-0.537303	-0.396764	-0.590999	-1.05559	0	0	0	0	0	0	0	0	0	0	0	0	0	0	0	0	0	0
0	-4.71409	1.12243	1.58805	1.29305	1.06629	1.22921	1.77235	-0.822481	1.40509	-1.57439	1.04163	-1.22876	1.02231	0.0853683	1.67467	0.998877	-0.53014	-0.883965	0.836398	-1.41368	0.979307	0	0	0	0	0	0	0	0	0	0	0	0	0	0	0	0	0	0
0	0	3.75251	1.01199	-1.73009	-0.526379	0.242441	-0.0322446	0.456143	-0.584386	1.35873	0.0250297	1.2313	-0.507509	-1.65095	-0.0640761	0.0797028	-0.152165	-0.275206	0.691129	-0.15223	1.15527	0	0	0	0	0	0	0	0	0	0	0	0	0	0	0	0	0	0
0	0	0	5.41653	1.57954	-0.11573	0.645616	-0.497529	-0.177354	-0.0439339	1.34047	0.493395	-0.361323	0.863947	-0.0693485	0.117557	-0.0196393	-0.760668	-0.142384	0.295702	0.640481	0.248135	0	0	0	0	0	0	0	0	0	0	0	0	0	0	0	0	0	0
0	0	0	0	4.56202	1.26151	-0.315812	1.99574	0.504984	1.02798	-0.114604	-0.0998998	-1.05224	-0.0599089	1.31894	-2.9759	-0.0609383	0.501357	0.395665	0.87631	-0.203575	1.65776	0	0	0	0	0	0	0	0	0	0	0	0	0	0	0	0	0	0
0	0	0	0	0	-3.46802	-0.296006	-0.916406	-0.708148	0.486573	-1.35592	-0.533135	-0.178455	0.454921	-0.785182	0.681595	-1.18254	-0.810906	0.975814	1.03703	-0.186044	0.305872	0	0	0	0	0	0	0	0	0	0	0	0	0	0	0	0	0	0
0	0	0	0	0	0	5.61155	0.428996	0.430223	0.0712732	-0.518004	0.17488	0.416869	0.0787013	0.234687	0.287411	0.159739	-1.35988	-2.63127	0.82163	-0.208337	-1.11676	0	0	0	0	0	0	0	0	0	0	0	0	0	0	0	0	0	0
0	0	0	0	0	0	0	2.61112	-0.0944775	0.0552468	0.140679	-0.25733	1.21109	0.147856	-0.16987	0.0779526	0.0285373	-0.464123	0.260428	0.161594	-0.543158	-0.607722	0	0	0	0	0	0	0	0	0	0	0	0	0	0	0	0	0	0
0	0	0	0	0	0	0	0	2.92514	0.985828	2.41002	-1.05376	-0.3824	1.20272	0.429177	-0.568333	0.372703	1.45794	-1.13149	0.141188	-0.119126	1.53667	0	0	0	0	0	0	0	0	0	0	0	0	0	0	0	0	0	0
0	0	0	0	0	0	0	0	0	-2.04791	-0.448971	0.452499	0.0134359	-0.508703	-0.621326	0.121817	0.695724	2.23952	0.721546	-0.987122	-0.223639	0.726337	0	0	0	0	0	0	0	0	0	0	0	0	0	0	0	0	0	0
0	0	0	0	0	0	0	0	0	0	-2.50458	0.0135172	-0.511924	0.54805	1.0663	0.780547	-0.0937639	0.244651	-1.70463	2.1013	-1.24087	-1.11735	0	0	0	0	0	0	0	0	0	0	0	0	0	0	0	0	0	0
0	0	0	0	0	0	0	0	0	0	0	3.50831	-0.191436	-0.728113	-0.0217317	-0.0735391	-0.894506	-1.82421	-0.297251	0.763518	-0.466771	1.16271	0	0	0	0	0	0	0	0	0	0	0	0	0	0	0	0	0	0
0	0	0	0	0	0	0	0	0	0	0	0	-2.95678	-0.00233449	-0.616303	-0.779873	1.06573	1.88938	0.0887328	-0.969963	-0.129849	0.329117	0	0	0	0	0	0	0	0	0	0	0	0	0	0	0	0	0	0
0	0	0	0	0	0	0	0	0	0	0	0	0	-1.7945	0.129915	-0.339958	-2.2862	-0.306127	-0.549698	1.22677	-0.209409	1.58956	0	0	0	0	0	0	0	0	0	0	0	0	0	0	0	0	0	0
0	0	0	0	0	0	0	0	0	0	0	0	0	0	-2.07665	1.26365	-0.609791	-1.232	2.56119	1.12111	2.63888	0.361215	0	0	0	0	0	0	0	0	0	0	0	0	0	0	0	0	0	0
0	0	0	0	0	0	0	0	0	0	0	0	0	0	0	2.40217	0.232275	-0.564654	0.370487	1.38519	-1.43777	1.98058	0	0	0	0	0	0	0	0	0	0	0	0	0	0	0	0	0	0
0	0	0	0	0	0	0	0	0	0	0	0	0	0	0	0	2.11578	0.715541	1.25616	-0.638006	-0.611843	-0.639201	0	0	0	0	0	0	0	0	0	0	0	0	0	0	0	0	0	0
0	0	0	0	0	0	0	0	0	0	0	0	0	0	0	0	0	-2.81331	-1.37834	1.81635	1.16987	-0.378756	0	0	0	0	0	0	0	0	0	0	0	0	0	0	0	0	0	0
0	0	0	0	0	0	0	0	0	0	0	0	0	0	0	0	0	0	-2.06711	-1.40616	1.735	-0.637886	0	0	0	0	0	0	0	0	0	0	0	0	0	0	0	0	0	0
0	0	0	0	0	0	0	0	0	0	0	0	0	0	0	0	0	0	0	2.33172	0.479156	0.704555	0	0	0	0	0	0	0	0	0	0	0	0	0	0	0	0	0	0
0	0	0	0	0	0	0	0	0	0	0	0	0	0	0	0	0	0	0	0	1.35622	-3.14996	0	0	0	0	0	0	0	0	0	0	0	0	0	0	0	0	0	0
0	0	0	0	0	0	0	0	0	0	0	0	0	0	0	0	0	0	0	0	0	-0.962574	0	0	0	0	0	0	0	0	0	0	0	0	0	0	0	0	0	0
0	0	0	0	0	0	0	0	0	0	0	0	0	0	0	0	0	0	0	0	0	0	0	0	0	0	0	0	0	0	0	0	0	0	0	0	0	0	0	0
5.45375	-2.22499	-0.819824	-0.858714	-0.150157	0.142098	-0.696258	0.0176347	-0.775376	-0.878681	-1.3906	-0.387072	0.620696	-1.36368	1.08228	-0.366872	-1.24061	-0.538754	2.00573	-1.07151	-0.123773	-1.41716	1.37686	0	0	0	0	0	0	0	0	0	0	0	0	0	0	0	0	0
0	4.53595	1.33297	1.35867	-0.197037	1.19882	0.354123	0.586597	-0.761551	0.0083134	-1.9032	0.331526	-1.39292	-1.23253	0.303728	-0.642707	0.182968	-0.849061	-0.834022	-0.338581	-0.0508412	1.32833	0.592977	0	0	0	0	0	0	0	0	0	0	0	0	0	0	0	0	0
0	0	-4.63541	-0.778447	0.486397	0.0897235	0.772157	-0.156706	1.93246	1.44722	-0.975191	-0.966233	0.516356	-0.66395	0.798126	0.762379	1.24891	-0.908965	-0.666508	0.715569	-0.726549	-0.998918	-1.29562	0	0	0	0	0	0	0	0	0	0	0	0	0	0	0	0	0
0	0	0	-5.14045	0.658858	-1.60727	-0.558875	1.05348	0.8128	-1.69606	0.663088	0.667533	-0.387832	-0.507928	-2.11544	1.31175	-1.36026	1.00219	-1.58623	-0.576275	0.683932	0.0441505	-0.742344	0	0	0	0	0	0	0	0	0	0	0	0	0	0	0	0	0
0	0	0	0	-3.39146	-2.48986	1.42123	1.83135	0.0779313	-0.232139	1.19246	0.17228	-0.626478	-0.469384	0.371131	-1.54617	0.689353	-1.8504	-0.484656	1.24638	-0.650477	-0.591331	0.174385	0	0	0	0	0	0	0	0	0	0	0	0	0	0	0	0	0
0	0	0	0	0	3.77304	1.51349	0.664432	-0.400162	0.321949	-0.59158	-2.65104	0.193735	0.215526	0.103968	0.641464	0.396371	0.0639397	-1.86043	0.672534	-0.736048	1.05113	0.615389	0	0	0	0	0	0	0	0	0	0	0	0	0	0	0	0	0
0	0	0	0	0	0	-4.27504	-0.0234712	-0.4867	1.14091	-0.660346	-1.18263	-0.504049	0.432689	0.912728	-0.718357	0.739406	-0.318393	0.634295	-0.967204	-0.384536	0.156028	0.391453	0	0	0	0	0	0	0	0	0	0	0	0	0	0	0	0	0
0	0	0	0	0	0	0	-3.12333	0.563526	1.125	0.958449	-0.000604388	1.64881	1.56305	0.22713	0.716347	0.2858	0.423305	0.781499	-0.258873	-0.946932	2.28009	0.364215	0	0	0	0	0	0	0	0	0	0	0	0	0	0	0	0	0
0	0	0	0	0	0	0	0	3.13364	-0.199069	0.700885	-0.019278	0.834228	-0.689163	-0.454353	-1.1321	-1.53268	0.56578	2.57328	1.4315	-1.05681	0.765818	2.27974	0	0	0	0	0	0	0	0	0	0	0	0	0	0	0	0	0
0	0	0	0	0	0	0	0	0	-3.00513	-1.11446	-0.952783	-0.286507	0.111226	-1.29233	-0.0553819	0.784078	1.02237	0.423921	0.424257	-0.481607	-0.940647	-1.84061	0	0	0	0	0	0	0	0	0	0	0	0	0	0	0	0	0
0	0	0	0	0	0	0	0	0	0	-3.7817	1.89761	-0.567693	0.44231	1.04757	-0.460682	-0.00854431	0.514278	-0.924114	1.58538	-0.380776	0.920604	0.363116	0	0	0	0	0	0	0	0	0	0	0	0	0	0	0	0	0
0	0	0	0	0	0	0	0	0	0	0	2.6864	1.12181	-0.332122	-0.275342	0.80634	-0.616896	-0.0528284	0.379433	-0.693074	0.418951	-0.710422	-1.97698	0	0	0	0	0	0	0	0	0	0	0	0	0	0	0	0	0
0	0	0	0	0	0	0	0	0	0	0	0	-2.68816	1.10637	-0.728572	-1.77454	-1.88342	0.988859	0.374408	0.822869	0.257163	-1.0286	-0.710936	0	0	0	0	0	0	0	0	0	0	0	0	0	0	0	0	0
0	0	0	0	0	0	0	0	0	0	0	0	0	3.0276	-1.07429	-0.250908	-0.653441	0.904986	0.363298	0.22678	1.46056	-0.222724	-0.660058	0	0	0	0	0	0	0	0	0	0	0	0	0	0	0	0	0
0	0	0	0	0	0	0	0	0	0	0	0	0	0	-2.4273	-0.341718	0.890979	-0.00310417	0.47799	0.749334	-0.0566517	-0.69343	0.989302	0	0	0	0	0	0	0	0	0	0	0	0	0	0	0	0	0
0	0	0	0	0	0	0	0	0	0	0	0	0	0	0	-1.90947	-0.404992	-0.321206	-1.40041	0.356551	1.44259	0.594406	0.293072	0	0	0	0	0	0	0	0	0	0	0	0	0	0	0	0	0
0	0	0	0	0	0	0	0	0	0	0	0	0	0	0	0	-2.84302	0.208401	-0.755661	1.10444	-0.513796	0.277709	-0.998216	0	0	0	0	0	0	0	0	0	0	0	0	0	0	0	0	0
0	0	0	0	0	0	0	0	0	0	0	0	0	0	0	0	0	2.20237	-0.465281	0.388985	-0.878752	0.113515	0.188694	0	0	0	0	0	0	0	0	0	0	0	0	0	0	0	0	0
0	0	0	0	0	0	0	0	0	0	0	0	0	0	0	0	0	0	-2.16887	-0.633727	0.0512944	0.546796	1.08807	0	0	0	0	0	0	0	0	0	0	0	0	0	0	0	0	0
0	0	0	0	0	0	0	0	0	0	0	0	0	0	0	0	0	0	0	-1.23963	0.0489223	0.379554	0.461454	0	0	0	0	0	0	0	0	0	0	0	0	0	0	0	0	0
0	0	0	0	0	0	0	0	0	0	0	0	0	0	0	0	0	0	0	0	1.0911	-0.824795	-1.69143	0	0	0	0	0	0	0	0	0	0	0	0	0	0	0	0	0
0	0	0	0	0	0	0	0	0	0	0	0	0	0	0	0	0	0	0	0	0	-0.397527	-0.107281	0	0	0	0	0	0	0	0	0	0	0	0	0	0	0	0	0
0	0	0	0	0	0	0	0	0	0	0	0	0	0	0	0	0	0	0	0	0	0	1.26333	0	0	0	0	0	0	0	0	0	0	0	0	0	0	0	0	0
0	0	0	0	0	0	0	0	0	0	0	0	0	0	0	0	0	0	0	0	0	0	0	0	0	0	0	0	0	0	0	0	0	0	0	0	0	0	0	0
5.71272	0.193461	1.42755	0.437482	-0.45494	0.689796	-0.846577	2.90845	-0.612521	1.53487	1.02147	0.564305	0.549201	0.772404	0.673636	-1.40588	-0.146622	-2.4497	0.776543	0.994788	1.13227	0.427431	-0.911725	-0.349047	0	0	0	0	0	0	0	0	0	0	0	0	0	0	0	0
0	-5.08262	-2.21246	0.374942	-0.962495	-0.748686	-0.899468	1.64022	-0.844956	-0.297655	0.452846	-0.040655	0.31044	0.248355	-0.356432	0.0666112	-0.0346273	-0.77949	-1.06748	-0.613898	-0.655274	0.967837	-0.736391	1.70514	0	0	0	0	0	0	0	0	0	0	0	0	0	0	0	0
0	0	4.70865	0.508375	0.718924	0.237466	0.441651	-0.601728	0.471109	-0.741805	0.333427	0.0470837	1.67715	-0.358116	0.975882	1.14302	-1.26015	1.56807	-0.724731	0.581828	0.135378	0.994456	1.06068	0.191491	0	0	0	0	0	0	0	0	0	0	0	0	0	0	0	0
0	0	0	-5.77832	0.0114156	-1.08718	0.79915	0.0171877	-0.815402	0.276955	-0.137674	0.274754	-1.02005	0.528038	-0.991941	-1.24176	-0.591848	-1.10187	0.454441	0.551563	0.757079	1.74922	0.608382	1.72646	0	0	0	0	0	0	0	0	0	0	0	0	0	0	0	0
0	0	0	0	-4.17988	0.656765	0.032218	0.420294	0.695334	-2.7274	1.37712	0.813098	-1.0498	-0.856415	0.116662	-1.253	0.37505	-0.523653	-0.0162273	-0.12613	-1.7884	0.865075	0.702048	-0.946636	0	0	0	0	0	0	0	0	0	0	0	0	0	0	0	0
0	0	0	0	0	4.70643	-0.102819	1.41394	-0.0253643	0.40545	-0.0779961	-1.01702	0.559355	-0.525039	-0.101929	0.12428	-0.754861	1.1766	-1.56318	-0.464566	-0.945521	1.29146	0.425218	-0.580943	0	0	0	0	0	0	0	0	0	0	0	0	0	0	0	0
0	0	0	0	0	0	-4.3919	-0.343744	-0.687437	-0.250133	1.33275	0.270531	1.28595	1.23843	0.672234	0.924791	1.45612	0.261357	-0.930406	1.10463	1.28262	-1.0365	-0.0365697	-2.82446	0	0	0	0	0	0	0	0	0	0	0	0	0	0	0	0
0	0	0	0	0	0	0	3.29782	0.127298	-1.22973	0.0688686	2.19626	1.34745	-0.0126715	1.1589	-0.360817	0.570448	-1.32894	0.852926	-0.993671	-0.842152	-0.814152	0.679571	0.305997	0	0	0	0	0	0	0	0	0	0	0	0	0	0	0	0
0	0	0	0	0	0	0	0	4.27135	0.193014	0.783155	-1.15937	-1.71049	0.0666682	0.464201	-1.04912	-1.47013	1.31534	0.301687	-0.995337	0.928663	0.806138	-0.615985	-1.38559	0	0	0	0	0	0	0	0	0	0	0	0	0	0	0	0
0	0	0	0	0	0	0	0	0	-2.97641	-0.112019	-0.380708	1.15963	0.764439	-0.563658	-0.787536	-0.426495	-0.33484	-0.0553768	0.342547	0.954343	1.79019	-0.906181	-1.01476	0	0	0	0	0	0	0	0	0	0	0	0	0	0	0	0
0	0	0	0	0	0	0	0	0	0	3.40478	-0.27995	0.363747	0.87926	0.274755	-0.662676	0.2248	1.03931	-0.105439	0.281561	0.890171	-0.308655	-0.646009	-0.497481	0	0	0	0	0	0	0	0	0	0	0	0	0	0	0	0
0	0	0	0	0	0	0	0	0	0	0	3.79635	0.748517	0.00319018	-0.0219218	0.23022	0.874892	1.40804	1.05511	0.421966	-0.105391	0.50202	-0.0500134	-0.807214	0	0	0	0	0	0	0	0	0	0	0	0	0	0	0	0
0	0	0	0	0	0	0	0	0	0	0	0	-2.74139	-1.02384	-0.617045	-0.124533	0.421874	-0.259443	-1.22622	0.280528	0.0281161	1.18223	-0.0773078	0.54239	0	0	0	0	0	0	0	0	0	0	0	0	0	0	0	0
0	0	0	0	0	0	0	0	0	0	0	0	0	3.31014	-0.208046	-1.1807	0.513119	-0.547877	1.17024	0.966708	-1.65887	-0.212862	-0.941101	0.321905	0	0	0	0	0	0	0	0	0	0	0	0	0	0	0	0
0	0	0	0	0	0	0	0	0	0	0	0	0	0	-3.41805	-0.562724	-1.15992	0.475733	0.0651279	1.61754	-0.530439	0.548963	0.234385	-0.979685	0	0	0	0	0	0	0	0	0	0	0	0	0	0	0	0
0	0	0	0	0	0	0	0	0	0	0	0	0	0	0	2.62418	-0.85325	0.572657	1.92473	-0.162055	0.577719	-0.383077	-0.0212323	0.579774	0	0	0	0	0	0	0	0	0	0	0	0	0	0	0	0
0	0	0	0	0	0	0	0	0	0	0	0	0	0	0	0	3.50792	0.15113	-0.158351	-0.618283	-0.335161	1.50558	-0.62784	-0.111785	0	0	0	0	0	0	0	0	0	0	0	0	0	0	0	0
0	0	0	0	0	0	0	0	0	0	0	0	0	0	0	0	0	2.28817	-2.05828	-1.00485	1.05475	-0.177907	-0.197085	-2.38274	0	0	0	0	0	0	0	0	0	0	0	0	0	0	0	0
0	0	0	0	0	0	0	0	0	0	0	0	0	0	0	0	0	0	-2.07094	0.907714	-1.59775	0.040085	-1.14667	1.40537	0	0	0	0	0	0	0	0	0	0	0	0	0	0	0	0
0	0	0	0	0	0	0	0	0	0	0	0	0	0	0	0	0	0	0	2.73264	1.16985	0.346957	-0.0140675	1.83296	0	0	0	0	0	0	0	0	0	0	0	0	0	0	0	0
0	0	0	0	0	0	0	0	0	0	0	0	0	0	0	0	0	0	0	0	1.57519	0.915217	0.671593	0.956676	0	0	0	0	0	0	0	0	0	0	0	0	0	0	0	0
0	0	0	0	0	0	0	0	0	0	0	0	0	0	0	0	0	0	0	0	0	-0.903792	0.130032	1.10563	0	0	0	0	0	0	0	0	0	0	0	0	0	0	0	0
0	0	0	0	0	0	0	0	0	0	0	0	0	0	0	0	0	0	0	0	0	0	-1.53472	-0.647216	0	0	0	0	0	0	0	0	0	0	0	0	0	0	0	0
0	0	0	0	0	0	0	0	0	0	0	0	0	0	0	0	0	0	0	0	0	0	0	0.0883234	0	0	0	0	0	0	0	0	0	0	0	0	0	0	0	0
0	0	0	0	0	0	0	0	0	0	0	0	0	0	0	0	0	0	0	0	0	0	0	0	0	0	0	0	0	0	0	0	0	0	0	0	0	0	0	0
-6.14153	0.0304546	-0.123838	-0.0952244	0.997585	1.39346	0.374082	0.225703	0.635567	1.15265	1.62602	0.815307	0.194765	0.176767	-0.824785	1.22837	1.59807	-0.471632	0.255864	0.912702	-0.92232	0.556251	-1.37852	1.51468	-0.304437	0	0	0	0	0	0	0	0	0	0	0	0	0	0	0
0	-4.67087	-0.762402	-1.32753	-0.59778	1.44654	0.789469	0.269737	-1.27061	1.56497	-0.662336	-0.545957	0.093742	0.20721	0.337165	-1.26098	1.47291	0.514381	-0.912635	-1.08062	1.52259	0.100728	-1.12094	0.280439	-1.71435	0	0	0	0	0	0	0	0	0	0	0	0	0	0	0
0	0	-5.00623	0.471775	0.27105	-0.979252	0.288805	-1.40238	1.26831	0.361799	-0.0311588	0.0455158	1.21623	0.0113863	0.0966354	0.283189	0.160278	-1.06976	0.851027	-1.97164	-0.0436434	0.709165	0.920961	-0.0606318	0.851463	0	0	0	0	0	0	0	0	0	0	0	0	0	0	0
0	0	0	-4.8453	1.2754	1.01398	-1.65063	0.141104	0.326075	-0.275307	1.09422	1.59772	0.74185	0.356386	0.471404	1.74962	0.684728	-0.51108	-0.125376	-0.215617	-0.536014	-0.731229	-2.07751	-0.461355	0.66606	0	0	0	0	0	0	0	0	0	0	0	0	0	0	0
0	0	0	0	3.90815	0.600407	0.644646	0.86672	-1.03481	1.00376	-1.06293	-0.0359884	-1.46463	0.620017	0.840227	-1.41407	1.07415	0.975913	0.819187	0.195436	-0.799337	-0.311887	0.455003	0.623684	-0.0435389	0	0	0	0	0	0	0	0	0	0	0	0	0	0	0
0	0	0	0	0	-4.10919	-1.04763	0.0270014	0.91626	1.97905	-0.0341396	0.81586	-2.6369	-0.676817	0.28529	-1.73586	-0.399927	0.555214	0.583651	-0.783685	0.229511	0.242107	1.82255	1.29107	1.15064	0	0	0	0	0	0	0	0	0	0	0	0	0	0	0
0	0	0	0	0	0	-4.48758	0.484893	0.792267	1.27368	-0.539984	-0.76244	0.942505	1.61484	0.134395	-2.0978	-0.863366	1.65169	-1.35341	-0.773148	0.0324594	-0.622191	-0.597917	-0.695371	-0.272284	0	0	0	0	0	0	0	0	0	0	0	0	0	0	0
0	0	0	0	0	0	0	5.19031	1.0095	0.359698	-0.301934	-0.534485	0.26316	-0.82228	2.15368	0.301698	0.28977	-0.325402	0.0559706	-0.657963	0.793062	0.614575	-0.874459	1.99439	0.733868	0	0	0	0	0	0	0	0	0	0	0	0	0	0	0
0	0	0	0	0	0	0	0	-3.42365	2.00649	0.804698	0.261805	1.00971	-1.13553	-1.24299	0.271691	2.21419	1.59528	-1.4393	0.314065	-0.278887	0.846354	-0.877365	1.7325	1.547	0	0	0	0	0	0	0	0	0	0	0	0	0	0	0
0	0	0	0	0	0	0	0	0	-2.68882	-0.595441	-1.42976	0.111223	0.302579	-0.881739	-1.78641	2.04596	-0.148528	0.136073	0.00203439	1.65155	-0.292224	1.25251	0.105474	-1.25919	0	0	0	0	0	0	0	0	0	0	0	0	0	0	0
0	0	0	0	0	0	0	0	0	0	4.20226	1.73594	0.544898	-0.182894	-0.555016	-0.775996	0.29972	0.557535	-0.518642	-0.85392	-1.16511	-0.747214	0.247004	-0.249023	0.185033	0	0	0	0	0	0	0	0	0	0	0	0	0	0	0
0	0	0	0	0	0	0	0	0	0	0	2.79625	1.7386	0.544519	-3.04488	-1.35911	-0.572049	-1.23772	-0.353859	-0.970329	0.185654	0.642062	0.689024	-0.282815	1.81134	0	0	0	0	0	0	0	0	0	0	0	0	0	0	0
0	0	0	0	0	0	0	0	0	0	0	0	-2.54813	-0.422232	-0.0116737	1.57996	1.34035	1.76971	0.460654	-1.44664	0.968423	1.20607	0.500432	0.655675	-0.432546	0	0	0	0	0	0	0	0	0	0	0	0	0	0	0
0	0	0	0	0	0	0	0	0	0	0	0	0	2.28594	0.303534	0.0735905	0.689422	1.27613	-0.0214207	-0.632043	-0.533901	1.10502	1.56636	0.865614	0.845059	0	0	0	0	0	0	0	0	0	0	0	0	0	0	0
0	0	0	0	0	0	0	0	0	0	0	0	0	0	-2.65053	0.701011	0.151041	-1.58583	0.380031	-0.339851	-1.04427	-1.00935	-0.914424	-0.638596	-0.0172766	0	0	0	0	0	0	0	0	0	0	0	0	0	0	0
0	0	0	0	0	0	0	0	0	0	0	0	0	0	0	-2.4992	0.634687	-1.0963	0.287758	-1.41899	1.02421	0.769636	0.110682	1.0239	0.588065	0	0	0	0	0	0	0	0	0	0	0	0	0	0	0
0	0	0	0	0	0	0	0	0	0	0	0	0	0	0	0	-3.06489	0.250064	-1.51142	-0.135973	1.45899	0.532785	-1.45173	-1.02933	-0.215731	0	0	0	0	0	0	0	0	0	0	0	0	0	0	0
0	0	0	0	0	0	0	0	0	0	0	0	0	0	0	0	0	2.51937	2.2177	-0.105555	0.797382	-1.67086	0.694046	-1.32478	1.33208	0	0	0	0	0	0	0	0	0	0	0	0	0	0	0
0	0	0	0	0	0	0	0	0	0	0	0	0	0	0	0	0	0	3.3628	-1.81767	-0.03003	-1.47172	-1.31035	-0.33723	-0.593865	0	0	0	0	0	0	0	0	0	0	0	0	0	0	0
0	0	0	0	0	0	0	0	0	0	0	0	0	0	0	0	0	0	0	-2.09161	-0.667212	-1.11149	0.00295522	0.517561	0.303357	0	0	0	0	0	0	0	0	0	0	0	0	0	0	0
0	0	0	0	0	0	0	0	0	0	0	0	0	0	0	0	0	0	0	0	-1.45636	0.113845	-1.12524	0.519176	2.15454	0	0	0	0	0	0	0	0	0	0	0	0	0	0	0
0	0	0	0	0	0	0	0	0	0	0	0	0	0	0	0	0	0	0	0	0	-2.19912	1.70923	0.240166	-0.439218	0	0	0	0	0	0	0	0	0	0	0	0	0	0	0
0	0	0	0	0	0	0	0	0	0	0	0	0	0	0	0	0	0	0	0	0	0	-1.84214	-0.405332	0.643637	0	0	0	0	0	0	0	0	0	0	0	0	0	0	0
0	0	0	0	0	0	0	0	0	0	0	0	0	0	0	0	0	0	0	0	0	0	0	-1.69726	-1.10707	0	0	0	0	0	0	0	0	0	0	0	0	0	0	0
0	0	0	0	0	0	0	0	0	0	0	0	0	0	0	0	0	0	0	0	0	0	0	0	0.377839	0	0	0	0	0	0	0	0	0	0	0	0	0	0	0
0	0	0	0	0	0	0	0	0	0	0	0	0	0	0	0	0	0	0	0	0	0	0	0	0	0	0	0	0	0	0	0	0	0	0	0	0	0	0	0
-4.12614	1.49008	0.149603	-2.06578	-0.72627	-0.00092784	0.496338	0.616406	2.89354	1.1565	-1.81274	0.763429	0.499387	-0.616878	0.9258	1.06106	0.365915	1.59829	-0.861693	-1.75845	1.1506	0.400469	-0.49674	1.13967	0.772369	1.06854	0	0	0	0	0	0	0	0	0	0	0	0	0	0
0	-6.1763	0.898047	0.144662	1.41968	-0.0964929	-0.303596	0.0425106	1.35389	0.604227	0.110654	-0.437141	-0.191376	-0.463455	1.15843	0.758759	0.578812	1.55759	-1.09977	-1.43842	-0.328704	0.95725	-0.104198	-0.87949	0.315481	0.262976	0	0	0	0	0	0	0	0	0	0	0	0	0	0
0	0	5.81977	-0.653937	1.29304	1.90051	-0.417804	-0.294558	-0.791612	-1.8815	0.153807	1.27838	0.700918	0.410943	-0.354942	-0.0894325	1.95314	1.07829	-0.228362	-0.324187	-1.29643	0.550841	0.942822	0.946098	-0.360034	0.504725	0	0	0	0	0	0	0	0	0	0	0	0	0	0
0	0	0	-4.20491	-0.654529	-1.303	1.46305	-0.307835	0.995764	-1.06245	0.569628	-1.579	2.15155	-0.843254	0.56457	1.12192	0.776219	0.497819	1.8869	0.408791	0.951343	-1.1886	1.13187	-2.46895	-0.0621902	-2.0469	0	0	0	0	0	0	0	0	0	0	0	0	0	0
0	0	0	0	4.81679	0.464039	0.150233	-0.676887	-0.855468	0.857332	0.0820459	1.85547	-0.00317172	-0.120057	1.09269	2.49696	-0.873727	-0.380115	0.489287	0.0413687	-0.406413	0.660512	2.06444	-0.212109	-0.470433	1.50815	0	0	0	0	0	0	0	0	0	0	0	0	0	0
0	0	0	0	0	4.59976	0.0883039	1.23007	1.10567	0.941639	-2.6591	0.730829	0.256222	0.169617	0.341973	1.86179	-0.0554028	-0.182109	-1.45538	-0.0335299	0.422193	1.49056	-0.0516939	1.86769	1.69329	0.467439	0	0	0	0	0	0	0	0	0	0	0	0	0	0
0	0	0	0	0	0	4.75876	-1.81567	0.837977	-0.281267	-0.0780829	1.447	-0.453847	-0.370973	0.88428	-1.24845	0.00380238	-1.23819	-1.40094	-1.06407	-1.20022	0.935019	0.372557	-1.26641	1.51754	-0.9072	0	0	0	0	0	0	0	0	0	0	0	0	0	0
0	0	0	0	0	0	0	-4.72538	-0.91079	-1.33502	-1.07377	0.552368	-1.8045	0.495589	-0.0859267	0.709697	-0.493735	-0.481829	0.545685	-0.876865	0.112229	2.17435	0.12622	-0.597995	-0.636598	1.52333	0	0	0	0	0	0	0	0	0	0	0	0	0	0
0	0	0	0	0	0	0	0	-5.88784	-1.01831	-0.0971311	0.269185	-1.06389	0.214523	-0.608357	0.201817	-0.0159207	-1.29581	1.8394	0.710106	0.247273	0.870003	-0.22458	-0.504692	1.9661	0.50594	0	0	0	0	0	0	0	0	0	0	0	0	0	0
0	0	0	0	0	0	0	0	0	-4.06866	0.859673	1.05851	0.520301	-0.184794	0.704147	1.4836	-0.445333	-1.03896	-0.521894	-0.129393	0.360693	-0.428081	0.795577	0.506674	1.24268	0.200732	0	0	0	0	0	0	0	0	0	0	0	0	0	0
0	0	0	0	0	0	0	0	0	0	4.07142	-0.520679	2.22149	0.850241	-1.07806	0.0686329	-1.37522	0.406174	-0.405591	1.23608	-0.0599304	0.187766	1.86839	1.097	0.00186785	0.274108	0	0	0	0	0	0	0	0	0	0	0	0	0	0
0	0	0	0	0	0	0	0	0	0	0	2.83892	-0.318538	-0.269225	-0.20632	-0.102835	2.48246	0.039347	-0.995375	0.0275189	0.806295	-0.0889377	-0.0446566	0.726837	0.119759	1.79229	0	0	0	0	0	0	0	0	0	0	0	0	0	0
0	0	0	0	0	0	0	0	0	0	0	0	3.60032	0.178591	-1.41861	0.0951665	2.04135	-0.497745	-1.17199	1.23192	-0.0447548	-0.0679165	0.617075	-1.21842	-0.782842	0.332235	0	0	0	0	0	0	0	0	0	0	0	0	0	0
0	0	0	0	0	0	0	0	0	0	0	0	0	4.09296	0.273309	-0.0387657	1.21562	-1.97665	0.39667	0.641057	-1.35691	0.636052	-0.6235	-0.437133	0.847239	-0.849814	0	0	0	0	0	0	0	0	0	0	0	0	0	0
0	0	0	0	0	0	0	0	0	0	0	0	0	0	-3.89001	0.778096	-0.868751	1.08956	2.10842	-1.59318	0.317239	0.101525	0.94552	2.61923	1.72158	-0.1204	0	0	0	0	0	0	0	0	0	0	0	0	0	0
0	0	0	0	0	0	0	0	0	0	0	0	0	0	0	3.01527	-0.230876	0.566959	1.1192	-0.833971	-0.708382	0.807778	1.28751	-0.897437	0.829452	-0.13462	0	0	0	0	0	0	0	0	0	0	0	0	0	0
0	0	0	0	0	0	0	0	0	0	0	0	0	0	0	0	3.38218	-1.76275	1.4637	0.416779	-1.70896	0.551294	0.136369	0.754533	0.285254	-0.332449	0	0	0	0	0	0	0	0	0	0	0	0	0	0
0	0	0	0	0	0	0	0	0	0	0	0	0	0	0	0	0	-2.89102	0.536308	-0.300646	1.1217	-0.571726	0.0375807	1.88567	0.74315	1.09601	0	0	0	0	0	0	0	0	0	0	0	0	0	0
0	0	0	0	0	0	0	0	0	0	0	0	0	0	0	0	0	0	-3.53408	0.140546	-1.42314	-0.434588	0.645868	-0.50596	0.982103	0.2196	0	0	0	0	0	0	0	0	0	0	0	0	0	0
0	0	0	0	0	0	0	0	0	0	0	0	0	0	0	0	0	0	0	3.77614	-0.313567	1.52232	-0.490226	1.21389	0.69801	0.229969	0	0	0	0	0	0	0	0	0	0	0	0	0	0
0	0	0	0	0	0	0	0	0	0	0	0	0	0	0	0	0	0	0	0	-1.89308	-2.18099	0.41941	-1.2246	-0.195504	-1.30574	0	0	0	0	0	0	0	0	0	0	0	0	0	0
0	0	0	0	0	0	0	0	0	0	0	0	0	0	0	0	0	0	0	0	0	0.956959	-0.0860585	0.278951	0.166309	1.68417	0	0	0	0	0	0	0	0	0	0	0	0	0	0
0	0	0	0	0	0	0	0	0	0	0	0	0	0	0	0	0	0	0	0	0	0	-0.687561	-1.68042	0.596229	0.899133	0	0	0	0	0	0	0	0	0	0	0	0	0	0
0	0	0	0	0	0	0	0	0	0	0	0	0	0	0	0	0	0	0	0	0	0	0	0.815124	-1.11499	-1.35123	0	0	0	0	0	0	0	0	0	0	0	0	0	0
0	0	0	0	0	0	0	0	0	0	0	0	0	0	0	0	0	0	0	0	0	0	0	0	0.738131	-1.15626	0	0	0	0	0	0	0	0	0	0	0	0	0	0
0	0	0	0	0	0	0	0	0	0	0	0	0	0	0	0	0	0	0	0	0	0	0	0	0	-1.04255	0	0	0	0	0	0	0	0	0	0	0	0	0	0
0	0	0	0	0	0	0	0	0	0	0	0	0	0	0	0	0	0	0	0	0	0	0	0	0	0	0	0	0	0	0	0	0	0	0	0	0	0	0	0
-4.74459	1.62734	-0.192453	-0.545805	1.04712	1.47749	-0.251174	-0.389265	-0.071568	-1.36226	3.42229	1.00427	-0.486713	1.33454	1.88636	0.0668717	0.448498	1.0931	-1.16377	-0.80056	-1.04979	-1.07876	0.365337	0.74288	0.446023	0.0800698	-0.402621	0	0	0	0	0	0	0	0	0	0	0	0	0
0	5.73547	-0.642025	0.736501	-0.0385664	0.716438	0.36379	-0.56126	-0.531597	-0.2728	-0.94327	1.26109	-0.525588	0.0903594	2.0861	-1.73448	-0.485101	1.07096	0.0997902	0.194503	-0.523137	-0.733058	1.2781	-1.04557	1.08571	1.13101	-1.04181	0	0	0	0	0	0	0	0	0	0	0	0	0
0	0	5.96938	-1.41744	0.544095	-1.06086	0.179879	0.432425	-0.344669	0.454323	-0.0135594	-0.528846	0.931001	1.79418	-1.40032	-2.37914	0.964151	-1.0925	-0.128217	1.31546	-0.155211	1.6289	-1.42121	-1.75259	-1.2023	0.264663	-2.6412	0	0	0	0	0	0	0	0	0	0	0	0	0
0	0	0	-5.13405	0.612729	-3.17436	-0.467345	-0.228959	0.0437778	-1.71323	0.544127	-1.19934	-1.073	1.04639	-0.0103783	0.0838743	-1.01844	1.06478	-0.27101	0.689562	0.122711	1.64106	-0.530052	0.278889	-0.906299	2.3453	-0.261763	0	0	0	0	0	0	0	0	0	0	0	0	0
0	0	0	0	-4.63302	-0.537592	-0.29524	0.347901	0.836265	0.865166	-0.926586	-0.10049	1.09508	-1.24213	-0.837517	-1.22743	0.967625	0.510452	-0.640135	0.457852	-0.598952	-0.915633	0.486716	-2.68416	0.679192	0.280586	1.04034	0	0	0	0	0	0	0	0	0	0	0	0	0
0	0	0	0	0	-5.431	0.5615	-1.69881	-0.678654	-0.972221	0.401806	-1.47116	-0.290768	-1.62863	0.380059	1.36709	-1.4157	-0.627465	1.21802	0.955254	0.279132	0.817777	-0.352732	0.042109	-0.288335	-0.217025	-1.79507	0	0	0	0	0	0	0	0	0	0	0	0	0
0	0	0	0	0	0	-3.53338	-1.30017	-1.28283	0.941286	0.19842	0.218216	0.262776	0.0895413	0.505865	-0.953006	0.592593	-0.548526	0.936767	-0.0518738	0.806533	0.168455	-0.612821	-0.127988	0.664489	0.313535	1.27837	0	0	0	0	0	0	0	0	0	0	0	0	0
0	0	0	0	0	0	0	4.55127	0.496908	0.918332	-0.30427	0.0970246	2.70305	1.15805	0.0562479	-1.18642	-1.10836	0.788976	0.420398	-0.0142806	-0.256897	0.430588	1.20214	-2.06324	-0.409448	1.1659	0.130288	0	0	0	0	0	0	0	0	0	0	0	0	0
0	0	0	0	0	0	0	0	4.02134	-0.915176	-0.734286	0.956266	0.741511	-0.0625282	0.550731	-2.11275	-0.406813	-0.758737	-0.42269	0.742945	0.309465	-1.0921	-0.227511	-0.353141	-1.14395	0.717756	-1.82586	0	0	0	0	0	0	0	0	0	0	0	0	0
0	0	0	0	0	0	0	0	0	-4.98921	-0.549764	1.04134	2.09211	0.26234	1.19426	0.282473	-0.689028	-0.912845	0.855077	0.114483	1.59702	1.76936	1.02567	-0.421339	-0.505837	-0.248038	-0.361042	0	0	0	0	0	0	0	0	0	0	0	0	0
0	0	0	0	0	0	0	0	0	0	-3.89465	0.147512	1.09447	-0.888864	-0.808992	-0.0962858	-1.46316	1.00075	-1.58198	-0.369527	-0.156432	1.49639	-0.110308	-0.627973	1.7164	-0.723933	-0.320703	0	0	0	0	0	0	0	0	0	0	0	0	0
0	0	0	0	0	0	0	0	0	0	0	3.77255	0.72013	0.962808	0.354885	-0.694664	0.138111	-0.72975	1.78547	-0.547142	0.00927974	0.791324	-1.23287	-1.07823	-0.0070952	1.05526	2.25198	0	0	0	0	0	0	0	0	0	0	0	0	0
0	0	0	0	0	0	0	0	0	0	0	0	-4.29248	-0.445217	0.0745739	0.537799	1.12095	-0.452037	0.164489	-0.0211586	0.259088	-0.515075	-0.0762482	-0.505012	0.415751	0.839069	-1.27306	0	0	0	0	0	0	0	0	0	0	0	0	0
0	0	0	0	0	0	0	0	0	0	0	0	0	-3.79148	-0.129868	-1.04595	-0.146863	-0.416177	-0.239808	1.54579	-0.324839	0.295755	-0.139921	0.25768	-0.0428893	-0.047329	-0.916632	0	0	0	0	0	0	0	0	0	0	0	0	0
0	0	0	0	0	0	0	0	0	0	0	0	0	0	-2.85719	-0.408503	-0.461303	1.11418	1.57649	0.664989	-0.067811	-0.254138	-1.06309	0.355879	-0.983657	-1.21191	-0.752086	0	0	0	0	0	0	0	0	0	0	0	0	0
0	0	0	0	0	0	0	0	0	0	0	0	0	0	0	3.65675	-1.0756	0.393047	-0.990793	-0.0909709	-1.89514	-0.126905	-0.113799	1.45475	-0.893229	1.40728	-0.615466	0	0	0	0	0	0	0	0	0	0	0	0	0
0	0	0	0	0	0	0	0	0	0	0	0	0	0	0	0	-3.5074	0.524194	-0.562767	-0.185434	2.57552	1.09709	-1.43208	0.339797	-0.354073	-1.12377	-0.578784	0	0	0	0	0	0	0	0	0	0	0	0	0
0	0	0	0	0	0	0	0	0	0	0	0	0	0	0	0	0	-4.13501	0.87999	-0.189895	-1.82342	1.69212	-0.588263	1.2421	-0.801896	0.498364	0.288985	0	0	0	0	0	0	0	0	0	0	0	0	0
0	0	0	0	0	0	0	0	0	0	0	0	0	0	0	0	0	0	-2.08416	-0.41668	-0.372054	0.854764	0.789223	-0.459994	0.591805	-0.0868273	1.16478	0	0	0	0	0	0	0	0	0	0	0	0	0
0	0	0	0	0	0	0	0	0	0	0	0	0	0	0	0	0	0	0	-3.34016	-0.0306208	0.55083	0.898384	0.756813	-0.746911	-1.43306	-1.50383	0	0	0	0	0	0	0	0	0	0	0	0	0
0	0	0	0	0	0	0	0	0	0	0	0	0	0	0	0	0	0	0	0	-3.02067	-0.610069	0.839762	-0.406114	0.0530177	0.354976	0.376636	0	0	0	0	0	0	0	0	0	0	0	0	0
0	0	0	0	0	0	0	0	0	0	0	0	0	0	0	0	0	0	0	0	0	2.59767	1.43648	-1.83657	0.639368	-0.93186	2.2838	0	0	0	0	0	0	0	0	0	0	0	0	0
0	0	0	0	0	0	0	0	0	0	0	0	0	0	0	0	0	0	0	0	0	0	-1.01406	1.33558	-0.320377	-0.769353	0.0140863	0	0	0	0	0	0	0	0	0	0	0	0	0
0	0	0	0	0	0	0	0	0	0	0	0	0	0	0	0	0	0	0	0	0	0	0	-1.43189	-1.06513	-1.24694	-0.420973	0	0	0	0	0	0	0	0	0	0	0	0	0
0	0	0	0	0	0	0	0	0	0	0	0	0	0	0	0	0	0	0	0	0	0	0	0	0.835164	0.0971661	0.568252	0	0	0	0	0	0	0	0	0	0	0	0	0
0	0	0	0	0	0	0	0	0	0	0	0	0	0	0	0	0	0	0	0	0	0	0	0	0	-2.70813	0.502514	0	0	0	0	0	0	0	0	0	0	0	0	0
0	0	0	0	0	0	0	0	0	0	0	0	0	0	0	0	0	0	0	0	0	0	0	0	0	0	0.624949	0	0	0	0	0	0	0	0	0	0	0	0	0
0	0	0	0	0	0	0	0	0	0	0	0	0	0	0	0	0	0	0	0	0	0	0	0	0	0	0	0	0	0	0	0	0	0	0	0	0	0	0	0
-5.06755	-1.44896	1.31438	1.79282	0.521961	-0.15445	0.14758	0.758346	0.717188	0.355893	-0.559898	-0.0751093	0.288103	0.155329	-0.273313	-0.133491	-1.5038	-0.586734	-1.05437	-0.0391503	0.168039	0.252528	0.705344	-0.409324	-0.328854	0.376801	0.593183	0.202261	0	0	0	0	0	0	0	0	0	0	0	0
0	5.67549	0.482697	1.31876	-0.238746	-2.53964	0.536751	-0.118201	-0.359917	0.477354	-2.52198	0.111903	-0.948782	0.878935	-2.14226	0.937771	-0.0771058	-1.37873	-0.885695	1.742	-0.74859	-0.36581	0.334379	-0.00832325	-1.97165	-1.00762	1.50172	-0.223451	0	0	0	0	0	0	0	0	0	0	0	0
0	0	-6.60996	-1.15665	0.221617	0.415322	-0.0110879	0.745838	0.272466	-0.309382	-1.74599	-2.25551	1.352	-0.867531	0.31169	1.13933	0.802269	-0.46823	1.03496	1.4643	-2.36926	-0.157481	-0.208866	-0.646735	-1.61731	0.655249	0.65692	-0.199445	0	0	0	0	0	0	0	0	0	0	0	0
0	0	0	-4.8781	0.814949	-0.0740195	1.55531	0.890825	0.19478	0.162292	1.11229	-0.453218	-0.172958	0.185162	-1.37448	0.223056	0.519019	-0.878526	2.08222	0.496281	0.00296783	0.176777	0.00431355	0.773459	-2.26691	-0.637641	-0.0480937	0.342125	0	0	0	0	0	0	0	0	0	0	0	0
0	0	0	0	-5.23276	1.5532	-0.172991	-0.290807	0.531026	-0.0279501	1.63601	0.341868	-0.90255	-1.47761	2.72952	0.836897	-0.077639	-0.137706	0.0450752	-0.531708	-0.339525	-1.60058	0.834351	-0.457658	1.12467	-0.492303	-0.0318374	-1.89448	0	0	0	0	0	0	0	0	0	0	0	0
0	0	0	0	0	5.05125	-0.817425	-0.480474	-1.52747	0.130013	0.180355	-1.07227	-0.507254	1.62055	0.362734	-1.1804	-1.08555	-0.570584	0.491257	0.0874961	-1.49788	0.457884	-0.972625	-0.816535	-0.719443	-1.49573	-1.10323	-1.07547	0	0	0	0	0	0	0	0	0	0	0	0
0	0	0	0	0	0	-5.30361	0.530295	1.23059	1.99442	1.68051	-0.214184	0.943618	0.336957	0.445273	-2.34662	0.331986	-0.058542	-0.360921	0.0523437	-0.833601	-0.442817	0.187591	0.868178	-2.82235	-1.08816	0.718863	0.638208	0	0	0	0	0	0	0	0	0	0	0	0
0	0	0	0	0	0	0	4.62007	-0.277234	0.646302	1.54385	-0.521106	-1.27577	0.890902	0.79791	-0.592376	0.121571	0.956105	1.58506	0.464963	-0.00108759	1.17313	0.805577	-1.99588	0.291226	0.415836	0.642251	0.501778	0	0	0	0	0	0	0	0	0	0	0	0
0	0	0	0	0	0	0	0	4.14495	0.0919872	-1.73408	-0.0455953	0.0215235	0.375929	-0.400781	-0.654751	1.08538	-0.248278	0.591538	-0.4167	-0.207689	1.89753	-0.834707	-0.591183	0.473614	-0.821271	-1.88032	-0.67763	0	0	0	0	0	0	0	0	0	0	0	0
0	0	0	0	0	0	0	0	0	-5.39502	0.725816	0.321282	-1.11012	-1.69688	-0.115086	1.14978	-0.548312	0.0416669	0.109665	1.18469	0.0308563	0.464197	0.336774	-1.16791	-0.0109522	-1.5366	0.382558	0.999491	0	0	0	0	0	0	0	0	0	0	0	0
0	0	0	0	0	0	0	0	0	0	3.24549	1.17435	-0.342367	0.297764	-0.361034	0.491157	-0.524005	0.204548	-0.52983	0.403395	-1.05103	0.618876	-1.29414	0.542739	2.57656	0.797395	0.433038	-0.475938	0	0	0	0	0	0	0	0	0	0	0	0
0	0	0	0	0	0	0	0	0	0	0	-3.43965	-0.110345	-0.701376	0.884843	0.981476	0.351519	-1.73842	-0.719939	0.0100962	-1.748	1.33311	0.243322	-1.12679	0.0138248	-0.578323	-0.643741	-1.23224	0	0	0	0	0	0	0	0	0	0	0	0
0	0	0	0	0	0	0	0	0	0	0	0	4.18011	-0.368174	-0.641983	-0.988167	-0.901189	0.0704375	-1.02033	1.87965	-1.02615	0.426082	-1.54417	0.0644754	1.49715	1.46206	0.281239	0.577954	0	0	0	0	0	0	0	0	0	0	0	0
0	0	0	0	0	0	0	0	0	0	0	0	0	-3.85183	1.08991	0.359334	-0.472613	-0.446876	-1.01183	1.17088	0.118721	-0.402604	0.643663	1.95712	-0.715148	0.464764	-0.119809	1.25514	0	0	0	0	0	0	0	0	0	0	0	0
0	0	0	0	0	0	0	0	0	0	0	0	0	0	3.34947	0.801108	1.25094	0.419631	0.065431	-0.645745	0.22152	-0.467196	2.80572	-2.17707	0.150691	2.34428	-1.24841	0.0381538	0	0	0	0	0	0	0	0	0	0	0	0
0	0	0	0	0	0	0	0	0	0	0	0	0	0	0	2.31929	0.0441682	-0.52176	-0.572131	-0.605187	0.265975	-0.857799	-0.362619	0.0490055	-1.01133	0.857131	0.0534035	0.992945	0	0	0	0	0	0	0	0	0	0	0	0
0	0	0	0	0	0	0	0	0	0	0	0	0	0	0	0	2.48996	-1.54533	0.734615	-0.384807	-0.613198	0.103117	0.468817	0.927099	0.829706	0.0318982	0.295252	1.07034	0	0	0	0	0	0	0	0	0	0	0	0
0	0	0	0	0	0	0	0	0	0	0	0	0	0	0	0	0	3.62045	1.56698	-1.17185	0.781979	-1.95882	-0.331004	-0.0448435	1.23837	-0.549845	-0.103548	-0.927423	0	0	0	0	0	0	0	0	0	0	0	0
0	0	0	0	0	0	0	0	0	0	0	0	0	0	0	0	0	0	1.72469	-0.411093	1.68875	-0.0878443	1.41648	0.553074	0.854269	-0.333635	-0.296996	0.232481	0	0	0	0	0	0	0	0	0	0	0	0
0	0	0	0	0	0	0	0	0	0	0	0	0	0	0	0	0	0	0	-3.6779	-0.415408	-0.652364	-0.860893	-0.4758	0.504805	1.10342	-0.807675	0.983416	0	0	0	0	0	0	0	0	0	0	0	0
0	0	0	0	0	0	0	0	0	0	0	0	0	0	0	0	0	0	0	0	-2.48435	-0.493049	1.74696	0.649303	0.520674	0.810684	0.248081	-1.63815	0	0	0	0	0	0	0	0	0	0	0	0
0	0	0	0	0	0	0	0	0	0	0	0	0	0	0	0	0	0	0	0	0	3.1367	-1.14296	0.607178	0.279653	0.57244	-0.309599	-0.385027	0	0	0	0	0	0	0	0	0	0	0	0
0	0	0	0	0	0	0	0	0	0	0	0	0	0	0	0	0	0	0	0	0	0	2.70801	-0.213103	0.0924518	0.262881	-1.02582	-1.13464	0	0	0	0	0	0	0	0	0	0	0	0
0	0	0	0	0	0	0	0	0	0	0	0	0	0	0	0	0	0	0	0	0	0	0	1.27538	1.20365	-1.52838	-1.07628	-0.621746	0	0	0	0	0	0	0	0	0	0	0	0
0	0	0	0	0	0	0	0	0	0	0	0	0	0	0	0	0	0	0	0	0	0	0	0	1.95547	0.211358	-0.0767468	1.56551	0	0	0	0	0	0	0	0	0	0	0	0
0	0	0	0	0	0	0	0	0	0	0	0	0	0	0	0	0	0	0	0	0	0	0	0	0	2.82045	-1.20567	1.69484	0	0	0	0	0	0	0	0	0	0	0	0
0	0	0	0	0	0	0	0	0	0	0	0	0	0	0	0	0	0	0	0	0	0	0	0	0	0	-1.27781	-0.902984	0	0	0	0	0	0	0	0	0	0	0	0
0	0	0	0	0	0	0	0	0	0	0	0	0	0	0	0	0	0	0	0	0	0	0	0	0	0	0	0.439276	0	0	0	0	0	0	0	0	0	0	0	0
0	0	0	0	0	0	0	0	0	0	0	0	0	0	0	0	0	0	0	0	0	0	0	0	0	0	0	0	0	0	0	0	0	0	0	0	0	0	0	0
-5.51213	-0.0015871	0.710292	0.00150427	-0.171583	1.8113	2.2172	1.48333	-0.323562	1.12731	-0.0112425	-0.175136	-0.439076	-0.727	0.632898	-1.58614	0.656822	-0.527813	0.842209	-0.479712	-0.496449	0.753893	0.677929	1.16131	-1.24992	0.31973	0.45295	-1.72309	-1.32936	0	0	0	0	0	0	0	0	0	0	0
0	-4.68767	0.326416	-1.01575	0.904269	1.22401	1.216	0.665816	-0.800172	-0.599226	0.378254	0.644459	-0.578778	1.88208	0.0567401	-1.49203	-0.417578	-0.129628	-2.08569	2.11008	0.686569	0.804252	-0.093054	-0.398225	0.607139	-0.311841	0.445331	-0.293155	0.902814	0	0	0	0	0	0	0	0	0	0	0
0	0	3.12715	-2.24963	0.29392	0.0515544	-0.129088	0.68712	0.926562	0.000387854	-0.95317	-2.25443	1.29331	-1.97693	0.753516	-0.496534	-0.150307	-1.3129	0.46423	-0.640057	1.53029	-0.446193	-1.03958	0.925669	2.11658	-1.55756	0.304238	-0.78798	0.358588	0	0	0	0	0	0	0	0	0	0	0
0	0	0	-3.75864	-0.947849	0.0565999	-0.458914	1.89409	2.25073	-0.0679729	0.600551	0.322661	0.772725	-0.466683	1.36933	-1.28591	-0.633351	0.267119	1.26471	0.166336	0.606485	-0.847761	-1.00762	-0.942688	-1.11483	0.519825	-0.647456	-1.11757	-1.23777	0	0	0	0	0	0	0	0	0	0	0
0	0	0	0	-4.26269	0.0859824	-0.880887	2.82399	0.797799	-1.22533	-1.27768	0.365985	0.0653962	0.10987	-0.225478	0.172587	1.43623	0.161556	0.282575	1.26914	-0.083313	1.59178	0.557051	-0.972011	-0.848443	0.515338	-1.28992	-1.05321	0.447763	0	0	0	0	0	0	0	0	0	0	0
0	0	0	0	0	4.42697	0.100729	-1.0981	0.1178	1.10699	-0.563966	-0.386383	-0.274379	-0.285765	0.0524549	-1.22392	0.215151	0.654492	-0.323352	-0.0833263	-0.47753	-0.103641	-0.576247	-0.0838603	-1.56433	0.406899	-1.55549	0.236318	-0.966978	0	0	0	0	0	0	0	0	0	0	0
0	0	0	0	0	0	-3.71062	0.988466	0.906216	-1.49449	-0.371316	0.912064	1.54014	0.538269	-0.308827	-0.462243	1.26508	0.197701	-0.174773	0.246072	-1.15731	-0.932523	-0.974523	0.225612	-0.944403	-0.119414	-1.95812	-0.799088	1.70805	0	0	0	0	0	0	0	0	0	0	0
0	0	0	0	0	0	0	5.82054	0.13364	-0.959754	0.511544	0.751009	-0.613608	0.998606	0.551125	-0.500054	-0.587436	-0.506512	1.13443	0.705251	-0.342051	0.930528	0.348705	-1.87737	-1.5271	0.447157	0.325304	0.300634	0.460371	0	0	0	0	0	0	0	0	0	0	0
0	0	0	0	0	0	0	0	-3.6766	-1.70976	-1.14456	-0.0458828	0.100677	0.544783	-0.704704	-1.45105	0.93868	0.28534	-1.87712	0.350412	-0.0696639	-0.344005	0.230987	-0.848929	0.910767	-0.946024	-0.20711	-1.62955	-0.22965	0	0	0	0	0	0	0	0	0	0	0
0	0	0	0	0	0	0	0	0	4.62528	-0.768286	-0.351215	0.740606	1.68464	0.653391	-0.869809	-1.66017	0.0748889	0.311171	0.0321978	-0.704852	-2.10921	-1.20465	0.772109	-0.354462	0.288509	0.392739	-0.747288	-0.156458	0	0	0	0	0	0	0	0	0	0	0
0	0	0	0	0	0	0	0	0	0	-4.08647	-0.472082	-2.29426	-0.106077	-0.126115	-1.73566	0.380261	0.939764	0.788639	1.79455	-0.991157	1.02842	-1.31427	-0.311864	-2.19922	-0.962108	-0.09526	2.3755	-0.441136	0	0	0	0	0	0	0	0	0	0	0
0	0	0	0	0	0	0	0	0	0	0	-5.60349	2.26312	-2.00435	-0.242178	0.322659	0.545605	0.445548	0.574678	0.187222	0.787667	-0.32512	-0.563134	-0.0854381	-0.273293	0.107438	0.0517165	-0.276514	1.25768	0	0	0	0	0	0	0	0	0	0	0
0	0	0	0	0	0	0	0	0	0	0	0	-4.72731	-1.53712	0.84068	-0.329683	0.368067	0.053611	-0.770346	0.816639	0.372381	0.830139	0.865072	1.16082	0.0765152	-0.575871	0.940073	0.251567	1.23605	0	0	0	0	0	0	0	0	0	0	0
0	0	0	0	0	0	0	0	0	0	0	0	0	3.40053	-0.0446188	1.54157	-0.583667	0.0965698	-0.313976	-1.25008	-0.19397	1.19415	-0.775167	-0.0995037	-0.463877	0.54252	-1.72657	-2.25034	0.298872	0	0	0	0	0	0	0	0	0	0	0
0	0	0	0	0	0	0	0	0	0	0	0	0	0	-3.51932	-0.642418	-0.333493	-0.0928401	0.759704	-0.736494	-2.22614	0.456915	0.463353	-0.59899	-1.66011	0.350427	1.2201	-0.640805	-0.820595	0	0	0	0	0	0	0	0	0	0	0
0	0	0	0	0	0	0	0	0	0	0	0	0	0	0	3.36607	-2.15698	0.271571	-0.170565	0.801427	-0.0062401	-0.319005	-0.529153	0.63878	-0.450385	-0.593258	2.00373	-1.06307	-0.198171	0	0	0	0	0	0	0	0	0	0	0
0	0	0	0	0	0	0	0	0	0	0	0	0	0	0	0	4.37156	-0.211082	0.677997	-0.840291	0.395259	-0.888537	-0.00708907	-1.0113	-0.739509	-0.911034	0.88687	-2.10358	0.309646	0	0	0	0	0	0	0	0	0	0	0
0	0	0	0	0	0	0	0	0	0	0	0	0	0	0	0	0	-4.04371	0.32246	0.434111	-0.981723	1.4914	0.7313	-1.20981	-0.0215459	1.49576	-1.01305	0.269203	0.883326	0	0	0	0	0	0	0	0	0	0	0
0	0	0	0	0	0	0	0	0	0	0	0	0	0	0	0	0	0	3.03372	-0.581588	-0.747789	2.19693	-0.105628	-0.228212	-1.83927	1.23224	-1.46083	-0.401615	-0.787008	0	0	0	0	0	0	0	0	0	0	0
0	0	0	0	0	0	0	0	0	0	0	0	0	0	0	0	0	0	0	3.24927	-0.662727	-0.0571123	0.332294	-0.337679	-1.86509	-1.82314	1.06864	-0.536555	0.508212	0	0	0	0	0	0	0	0	0	0	0
0	0	0	0	0	0	0	0	0	0	0	0	0	0	0	0	0	0	0	0	1.74275	1.72459	0.547873	0.441008	0.968542	0.574915	-0.920555	0.113731	-0.969802	0	0	0	0	0	0	0	0	0	0	0
0	0	0	0	0	0	0	0	0	0	0	0	0	0	0	0	0	0	0	0	0	-1.33663	-0.35705	0.100931	-0.318835	-0.211586	-1.008	-1.90559	-0.910459	0	0	0	0	0	0	0	0	0	0	0
0	0	0	0	0	0	0	0	0	0	0	0	0	0	0	0	0	0	0	0	0	0	-2.36727	0.122354	0.525996	-0.649879	-1.94213	-0.747767	1.06537	0	0	0	0	0	0	0	0	0	0	0
0	0	0	0	0	0	0	0	0	0	0	0	0	0	0	0	0	0	0	0	0	0	0	1.84335	0.546745	0.0510233	0.837817	-0.138041	-0.876121	0	0	0	0	0	0	0	0	0	0	0
0	0	0	0	0	0	0	0	0	0	0	0	0	0	0	0	0	0	0	0	0	0	0	0	1.35391	-0.320187	-0.079608	-0.259034	-1.43007	0	0	0	0	0	0	0	0	0	0	0
0	0	0	0	0	0	0	0	0	0	0	0	0	0	0	0	0	0	0	0	0	0	0	0	0	-1.37068	-0.111413	-1.67393	-1.93536	0	0	0	0	0	0	0	0	0	0	0
0	0	0	0	0	0	0	0	0	0	0	0	0	0	0	0	0	0	0	0	0	0	0	0	0	0	-0.976224	-0.0685137	0.781542	0	0	0	0	0	0	0	0	0	0	0
0	0	0	0	0	0	0	0	0	0	0	0	0	0	0	0	0	0	0	0	0	0	0	0	0	0	0	0.659563	-0.352677	0	0	0	0	0	0	0	0	0	0	0
0	0	0	0	0	0	0	0	0	0	0	0	0	0	0	0	0	0	0	0	0	0	0	0	0	0	0	0	-0.300365	0	0	0	0	0	0	0	0	0	0	0
0	0	0	0	0	0	0	0	0	0	0	0	0	0	0	0	0	0	0	0	0	0	0	0	0	0	0	0	0	0	0	0	0	0	0	0	0	0	0	0
-5.98309	1.52936	-0.93509	1.5171	-0.00100177	0.463756	1.39916	-1.49101	-1.58977	-0.0272094	-0.65244	0.174797	-0.52378	-0.145562	0.735527	1.70694	1.49583	1.15669	-1.97529	1.11107	1.5129	0.301534	0.199598	-0.106068	-1.69007	1.03356	-0.718044	0.74006	-0.622427	2.80637	0	0	0	0	0	0	0	0	0	0
0	5.79193	-0.678218	0.667682	0.231856	0.19922	-1.17932	0.682542	-1.03099	-0.551178	0.215632	-0.105512	0.309701	0.571154	0.372236	-0.184483	0.268001	0.435454	0.0480124	0.0305641	0.644041	0.31497	0.0457149	1.44749	0.126621	0.166061	1.36987	0.128764	-0.218921	-0.246	0	0	0	0	0	0	0	0	0	0
0	0	-5.421	0.565294	0.936908	-1.19103	0.413991	0.384196	0.124421	1.59539	0.158141	1.08942	-0.137217	-1.37374	0.252789	-0.633777	0.564995	-0.907008	0.575409	1.53952	-0.959875	-0.549578	-0.132629	0.382228	-0.590349	1.09433	-0.346271	-1.91737	-1.78502	0.229601	0	0	0	0	0	0	0	0	0	0
0	0	0	-3.93356	-0.208859	0.830709	0.730754	-0.194493	0.875118	-0.583828	1.62941	1.30043	1.10296	-0.630762	-0.572784	-1.07625	0.247371	-1.48602	-1.21477	0.541663	-1.52071	-1.04933	0.0732119	-0.237561	0.983491	2.77329	-1.53922	-1.32999	0.576355	1.68706	0	0	0	0	0	0	0	0	0	0
0	0	0	0	5.23621	0.855032	-0.0903162	1.33662	1.11825	-0.182705	0.514929	-0.231515	-2.05283	-0.41158	0.473499	0.0237208	1.13074	-0.85104	-0.946291	0.390341	-0.37327	-1.29865	-0.559467	-0.127824	0.0434436	0.304808	0.194131	-0.210896	-0.934702	0.568787	0	0	0	0	0	0	0	0	0	0
0	0	0	0	0	4.58289	0.535951	-0.950757	0.918137	-1.63812	0.745031	-1.87563	0.639012	-1.48905	1.66472	0.534974	-0.413064	-0.537083	-1.07894	-0.212599	-1.76329	1.72858	0.0648132	-0.811217	-0.636205	-0.149098	-2.16114	1.04579	-0.715966	0.419361	0	0	0	0	0	0	0	0	0	0
0	0	0	0	0	0	4.33022	0.267737	-2.11049	1.38809	-0.154213	1.40167	1.38194	-2.21014	1.38262	0.402579	0.177888	-0.0932462	0.631649	0.609787	-2.09609	0.507765	0.614264	0.43924	-0.723371	0.668474	-0.961702	2.62418	-0.732024	-0.855828	0	0	0	0	0	0	0	0	0	0
0	0	0	0	0	0	0	-4.08	-1.93624	-0.148538	-0.389116	0.555064	0.613517	0.126138	-1.25049	0.765381	-0.645559	0.178771	-0.82802	-0.310698	-1.9586	-0.418053	0.627776	0.625993	-0.58577	0.0847445	-0.120669	0.78553	-0.0221254	0.471872	0	0	0	0	0	0	0	0	0	0
0	0	0	0	0	0	0	0	-4.87605	-0.0203302	-1.67475	1.0208	-0.87657	-0.615104	0.975143	-0.391884	1.49791	0.150474	1.60941	0.226268	-0.283867	-0.145762	-0.616217	0.122725	0.54717	1.01782	0.771932	-0.731387	0.0955961	0.377923	0	0	0	0	0	0	0	0	0	0
0	0	0	0	0	0	0	0	0	4.29131	-0.886988	-1.1667	0.305289	-0.0901577	0.0672933	1.44771	1.32873	0.445897	0.754252	1.00241	-0.46815	-1.09782	0.338558	0.693819	0.81899	0.188629	0.528342	0.366159	0.184556	0.231967	0	0	0	0	0	0	0	0	0	0
0	0	0	0	0	0	0	0	0	0	-3.95385	0.298983	-1.38075	0.0506588	-0.905016	-1.33183	-0.334233	-0.976973	-0.809176	-0.0611761	-0.21039	2.31493	-1.4593	-1.01795	-0.165334	1.21354	0.132763	-0.133679	-0.184579	1.20262	0	0	0	0	0	0	0	0	0	0
0	0	0	0	0	0	0	0	0	0	0	-4.03088	-1.05153	2.31463	2.55569	1.83511	0.275783	0.253402	-1.32491	0.453572	-0.999068	0.353082	0.168861	-0.431388	-0.151463	-0.636882	0.925972	0.930542	1.42532	-2.85578	0	0	0	0	0	0	0	0	0	0
0	0	0	0	0	0	0	0	0	0	0	0	4.61808	0.338497	-0.863361	0.450482	-0.10401	0.0424241	0.192221	0.507843	0.561276	-3.12514	0.188391	0.411841	-0.315484	-0.689897	0.374265	-0.383877	2.03281	-1.05524	0	0	0	0	0	0	0	0	0	0
0	0	0	0	0	0	0	0	0	0	0	0	0	4.51557	0.964152	-0.682015	0.823222	1.08268	0.176619	-0.23142	0.638764	-0.35357	0.459307	0.310766	-3.05304	-1.07575	0.581728	2.06289	0.167921	-0.473536	0	0	0	0	0	0	0	0	0	0
0	0	0	0	0	0	0	0	0	0	0	0	0	0	3.85032	-0.574339	-0.549586	0.0347454	-0.917326	1.40713	-1.49581	0.0576502	1.96041	-0.288852	0.023866	-1.00011	-0.214541	1.03975	-1.31634	-0.266126	0	0	0	0	0	0	0	0	0	0
0	0	0	0	0	0	0	0	0	0	0	0	0	0	0	-3.95713	-0.220369	-0.0386568	-2.07648	0.144574	2.22785	0.434314	-0.351206	-0.0696504	0.0890724	1.9052	0.113303	-1.70091	-1.09667	-1.74316	0	0	0	0	0	0	0	0	0	0
0	0	0	0	0	0	0	0	0	0	0	0	0	0	0	0	3.74173	0.232896	0.546355	-0.155777	-1.61094	-1.61743	-0.505726	-0.0159315	0.878457	-0.0737462	0.6983	1.82572	-0.861548	-1.22285	0	0	0	0	0	0	0	0	0	0
0	0	0	0	0	0	0	0	0	0	0	0	0	0	0	0	0	-2.25777	0.938561	-0.146167	-0.301271	-0.193272	0.122735	0.365051	2.33217	0.44526	0.91099	0.592463	0.88185	-1.99	0	0	0	0	0	0	0	0	0	0
0	0	0	0	0	0	0	0	0	0	0	0	0	0	0	0	0	0	-3.29008	-0.242514	-1.509	-0.0662716	0.723168	0.867126	0.584584	3.02897	0.879738	1.36531	-2.21867	-1.09234	0	0	0	0	0	0	0	0	0	0
0	0	0	0	0	0	0	0	0	0	0	0	0	0	0	0	0	0	0	-3.51285	-0.495756	-1.49954	-0.179544	1.63264	-0.167454	-0.816166	1.16	-1.04749	-0.0329243	0.167704	0	0	0	0	0	0	0	0	0	0
0	0	0	0	0	0	0	0	0	0	0	0	0	0	0	0	0	0	0	0	-3.45035	-0.19448	-0.476174	-0.214247	-0.887943	0.00431655	1.23989	-0.693715	0.494716	-2.31319	0	0	0	0	0	0	0	0	0	0
0	0	0	0	0	0	0	0	0	0	0	0	0	0	0	0	0	0	0	0	0	-3.32401	0.898401	-0.603812	0.547438	0.317703	0.517318	-1.40221	-0.00391242	-0.618706	0	0	0	0	0	0	0	0	0	0
0	0	0	0	0	0	0	0	0	0	0	0	0	0	0	0	0	0	0	0	0	0	3.29638	0.29568	-0.49579	-0.993664	0.18763	1.04377	1.45017	0.369149	0	0	0	0	0	0	0	0	0	0
0	0	0	0	0	0	0	0	0	0	0	0	0	0	0	0	0	0	0	0	0	0	0	-2.89168	0.66579	0.657488	0.391479	-0.702044	1.43398	-0.80577	0	0	0	0	0	0	0	0	0	0
0	0	0	0	0	0	0	0	0	0	0	0	0	0	0	0	0	0	0	0	0	0	0	0	2.51976	-0.293528	-0.188573	1.06558	0.602208	-0.197524	0	0	0	0	0	0	0	0	0	0
0	0	0	0	0	0	0	0	0	0	0	0	0	0	0	0	0	0	0	0	0	0	0	0	0	-1.91415	0.0823183	-1.37871	-0.278232	-1.76487	0	0	0	0	0	0	0	0	0	0
0	0	0	0	0	0	0	0	0	0	0	0	0	0	0	0	0	0	0	0	0	0	0	0	0	0	-2.88903	-1.59468	0.451143	0.24053	0	0	0	0	0	0	0	0	0	0
0	0	0	0	0	0	0	0	0	0	0	0	0	0	0	0	0	0	0	0	0	0	0	0	0	0	0	1.97015	0.240858	-0.420376	0	0	0	0	0	0	0	0	0	0
0	0	0	0	0	0	0	0	0	0	0	0	0	0	0	0	0	0	0	0	0	0	0	0	0	0	0	0	0.682636	-0.606871	0	0	0	0	0	0	0	0	0	0
0	0	0	0	0	0	0	0	0	0	0	0	0	0	0	0	0	0	0	0	0	0	0	0	0	0	0	0	0	0.404809	0	0	0	0	0	0	0	0	0	0
0	0	0	0	0	0	0	0	0	0	0	0	0	0	0	0	0	0	0	0	0	0	0	0	0	0	0	0	0	0	0	0	0	0	0	0	0	0	0	0
5.8655	-1.36153	-0.894021	1.48028	0.242043	0.413954	-0.0305339	0.853205	0.881451	0.742194	-0.460854	-0.195166	0.897758	-0.180552	0.495469	0.738536	-1.5948	1.78171	0.143469	-1.22686	0.677206	-0.91055	-1.685	-0.573622	-0.607451	0.709086	-0.707237	0.747098	-0.24281	0.196003	0.244495	0	0	0	0	0	0	0	0	0
0	5.32457	1.11161	1.11231	2.40533	0.0388961	0.118983	1.42114	-0.254703	-1.10746	-0.408252	-0.955429	-1.00673	0.125654	-0.0646209	0.650552	-1.27216	1.2652	-0.925196	2.24499	0.135623	-1.67839	-0.179837	-2.54545	-1.15044	1.52983	-0.286872	0.892788	0.10623	1.18104	-0.524664	0	0	0	0	0	0	0	0	0
0	0	4.83237	-0.116702	-0.273668	-0.471372	-0.770303	0.912821	-0.0534756	-2.25851	-1.42886	-1.17031	-1.02299	1.52834	-0.774002	-0.44371	-0.235211	-0.40356	-1.04997	0.542477	0.526365	0.784325	-0.862658	0.0612294	-0.468881	-0.560916	1.45567	1.77822	2.08915	-1.51805	0.439098	0	0	0	0	0	0	0	0	0
0	0	0	-4.17061	0.792801	0.740093	-0.477861	1.04755	0.842637	-0.196484	-0.567648	1.67144	0.0251123	-0.110365	-0.218919	-0.0931515	1.23033	0.735887	1.26364	0.28512	-1.35571	0.299965	0.287703	-0.174286	0.546534	-2.20198	-0.899437	0.474932	-0.352592	-2.68614	1.2537	0	0	0	0	0	0	0	0	0
0	0	0	0	-4.79444	0.402419	1.03642	1.9128	0.294174	-0.500697	1.53958	-1.06673	2.56328	2.18977	0.740492	0.455368	0.742853	0.0341469	1.0704	-0.728575	-0.976484	-0.175681	-0.335757	-0.939584	0.91877	-0.764872	-1.20764	1.14147	-1.15395	0.665711	0.0905393	0	0	0	0	0	0	0	0	0
0	0	0	0	0	3.63702	0.129714	0.375435	1.62468	-0.176821	0.43592	-0.349309	-0.234626	0.367465	-0.66734	-0.304277	-2.00041	0.539519	0.116609	1.40936	-0.521365	-0.294487	-0.425172	-0.26311	-0.318441	-0.35463	-1.88771	0.697894	-0.997182	-0.213709	-0.0398333	0	0	0	0	0	0	0	0	0
0	0	0	0	0	0	-4.3439	0.502954	-1.11163	1.16456	0.466084	0.49808	0.956457	0.951801	-0.335437	1.59244	0.256484	1.52969	1.19725	-0.839587	-1.00206	0.540213	1.67062	-0.381875	0.376555	-0.495185	1.37047	1.78335	0.865343	-1.16643	-1.74502	0	0	0	0	0	0	0	0	0
0	0	0	0	0	0	0	-4.1475	-0.899067	0.990491	2.35778	0.239266	1.18739	0.525715	1.02649	-1.58062	2.20009	0.0106731	0.461845	-0.138124	1.81069	0.900902	1.59817	-0.352302	-0.143845	-0.45153	1.14254	-0.0545183	0.892961	0.121628	2.06767	0	0	0	0	0	0	0	0	0
0	0	0	0	0	0	0	0	3.87475	-0.804498	0.149766	-0.0682699	-1.57422	2.25234	-2.57368	1.40343	2.02918	-0.609621	-0.878372	0.390092	-0.670197	-0.138036	-1.09444	1.80259	0.00391138	-0.520455	0.883166	-1.30033	-1.4906	-1.21574	-0.186461	0	0	0	0	0	0	0	0	0
0	0	0	0	0	0	0	0	0	5.316	-0.146267	0.687332	-0.891046	-0.464835	1.82269	1.33769	1.07079	0.0842281	0.646674	0.04902	0.361511	0.706964	0.673726	1.1069	2.50685	-1.82825	-0.170071	-1.06573	0.130413	0.178904	1.12708	0	0	0	0	0	0	0	0	0
0	0	0	0	0	0	0	0	0	0	3.325	0.162686	0.146302	1.82347	0.209117	0.256571	-0.0507358	-1.46289	-0.14382	1.4459	-1.79274	0.268809	1.28874	-0.743782	-1.05283	-1.30416	-0.3507	1.80937	0.618655	-0.0585381	0.555452	0	0	0	0	0	0	0	0	0
0	0	0	0	0	0	0	0	0	0	0	3.93699	-1.7942	0.138464	-0.773699	-0.542116	0.482098	0.149282	0.0518722	0.451276	0.380364	-0.865189	-0.201473	-0.125037	0.0051384	0.303307	-0.36186	-2.63605	0.509278	1.05073	-1.14546	0	0	0	0	0	0	0	0	0
0	0	0	0	0	0	0	0	0	0	0	0	-4.03819	0.368563	-1.52252	0.410015	1.3175	-3.16698	-1.02188	-0.0886054	-0.984115	-1.52937	1.81216	-0.598923	0.734488	-0.769976	1.1378	0.356941	1.99556	0.027662	-0.536354	0	0	0	0	0	0	0	0	0
0	0	0	0	0	0	0	0	0	0	0	0	0	3.67354	0.0136085	0.516273	0.509249	-0.798592	-2.39188	0.286139	1.67287	1.28225	0.442361	-0.50806	0.196553	-0.596216	-0.42229	0.111843	-0.0145771	-0.722587	1.3634	0	0	0	0	0	0	0	0	0
0	0	0	0	0	0	0	0	0	0	0	0	0	0	-4.06363	-0.085617	0.477594	-0.315524	-0.60679	-0.683183	-0.955148	-0.617044	-0.511701	0.65253	0.644559	-1.43305	1.00165	-0.515293	0.510301	-0.442762	-0.541362	0	0	0	0	0	0	0	0	0
0	0	0	0	0	0	0	0	0	0	0	0	0	0	0	3.66869	-0.614646	-0.412111	1.17087	-0.852865	0.168171	1.15303	-0.170459	0.778745	0.281284	-0.321039	0.633192	-0.592955	0.161458	-0.00112058	-0.298929	0	0	0	0	0	0	0	0	0
0	0	0	0	0	0	0	0	0	0	0	0	0	0	0	0	2.37336	0.531424	0.643228	-0.739397	-1.47137	-0.446336	-0.00157191	0.628343	-1.60992	-1.67009	0.453157	0.960266	-0.153051	0.00697867	-1.47408	0	0	0	0	0	0	0	0	0
0	0	0	0	0	0	0	0	0	0	0	0	0	0	0	0	0	-4.76158	0.595375	0.609877	0.0738512	1.46588	1.50015	-1.43476	-1.75476	0.295241	0.707062	1.83024	-1.1842	0.579236	0.445787	0	0	0	0	0	0	0	0	0
0	0	0	0	0	0	0	0	0	0	0	0	0	0	0	0	0	0	3.77625	-0.680779	0.605957	0.506336	-0.907844	-0.684018	1.47042	-0.255586	0.0267794	-0.434198	-0.13381	0.26418	-0.279453	0	0	0	0	0	0	0	0	0
0	0	0	0	0	0	0	0	0	0	0	0	0	0	0	0	0	0	0	4.04415	-0.785549	1.32983	1.5387	-0.710369	0.690789	0.625328	-0.507637	1.86742	0.493876	0.323979	1.33714	0	0	0	0	0	0	0	0	0
0	0	0	0	0	0	0	0	0	0	0	0	0	0	0	0	0	0	0	0	2.93051	-0.304671	0.268524	-0.320231	0.219171	-0.246875	0.190566	0.691482	-0.334064	-0.649526	0.624568	0	0	0	0	0	0	0	0	0
0	0	0	0	0	0	0	0	0	0	0	0	0	0	0	0	0	0	0	0	0	3.00825	-0.856738	-0.487252	0.757762	0.634555	0.425132	1.44263	-0.218986	1.39739	1.2564	0	0	0	0	0	0	0	0	0
0	0	0	0	0	0	0	0	0	0	0	0	0	0	0	0	0	0	0	0	0	0	3.4961	0.0326733	-0.641427	-0.96848	1.83014	-1.39307	-0.370732	-0.161379	-0.92955	0	0	0	0	0	0	0	0	0
0	0	0	0	0	0	0	0	0	0	0	0	0	0	0	0	0	0	0	0	0	0	0	2.0203	-0.902545	1.53654	-0.472012	1.18838	-0.120044	-0.558018	-1.13616	0	0	0	0	0	0	0	0	0
0	0	0	0	0	0	0	0	0	0	0	0	0	0	0	0	0	0	0	0	0	0	0	0	-2.04463	0.477281	0.9783	0.289592	2.13041	0.860874	-0.998525	0	0	0	0	0	0	0	0	0
0	0	0	0	0	0	0	0	0	0	0	0	0	0	0	0	0	0	0	0	0	0	0	0	0	-2.08476	-1.48243	-0.648721	-1.23617	0.789038	-0.525352	0	0	0	0	0	0	0	0	0
0	0	0	0	0	0	0	0	0	0	0	0	0	0	0	0	0	0	0	0	0	0	0	0	0	0	-2.79104	-0.997609	0.557326	-1.4183	0.00532771	0	0	0	0	0	0	0	0	0
0	0	0	0	0	0	0	0	0	0	0	0	0	0	0	0	0	0	0	0	0	0	0	0	0	0	0	-2.57761	0.0550456	-0.288556	-0.818814	0	0	0	0	0	0	0	0	0
0	0	0	0	0	0	0	0	0	0	0	0	0	0	0	0	0	0	0	0	0	0	0	0	0	0	0	0	0.617351	0.787148	0.175737	0	0	0	0	0	0	0	0	0
0	0	0	0	0	0	0	0	0	0	0	0	0	0	0	0	0	0	0	0	0	0	0	0	0	0	0	0	0	2.17418	1.09982	0	0	0	0	0	0	0	0	0
0	0	0	0	0	0	0	0	0	0	0	0	0	0	0	0	0	0	0	0	0	0	0	0	0	0	0	0	0	0	-2.02567	0	0	0	0	0	0	0	0	0
0	0	0	0	0	0	0	0	0	0	0	0	0	0	0	0	0	0	0	0	0	0	0	0	0	0	0	0	0	0	0	0	0	0	0	0	0	0	0	0
-5.10759	1.42527	0.241109	0.215721	-0.991826	-0.600394	1.21024	-0.528437	-0.711109	1.50504	-1.50444	-0.0779367	0.717149	-0.218162	0.617491	-1.00424	1.5488	-0.302837	-0.808249	-1.01116	-0.0763933	0.179335	0.384989	0.708648	0.495714	-1.81673	0.130842	1.7442	0.292902	-0.17288	-1.01411	1.1238	0	0	0	0	0	0	0	0
0	5.11422	-1.34702	-0.337718	0.735576	-1.27382	-0.336988	-0.482641	-0.444605	-1.42585	2.19092	0.322355	0.803028	0.137243	-0.335511	1.12749	0.895263	-2.01734	2.21157	-0.640762	-0.444567	-0.028111	1.26757	-0.854407	-0.597287	0.221439	-0.478836	0.960071	1.76471	-0.137631	1.47338	-1.08561	0	0	0	0	0	0	0	0
0	0	5.85758	1.46773	0.962613	-0.767946	0.43827	1.20625	0.984442	0.0012252	-0.367267	1.02515	-0.56606	1.29409	2.25229	0.914105	0.135476	0.376711	-1.04681	0.164448	0.717725	-1.42094	-1.38637	1.60881	-1.15072	-0.256181	-0.0907581	0.163897	-1.56507	0.153981	-0.418988	-1.62354	0	0	0	0	0	0	0	0
0	0	0	-4.7126	-0.0529437	-0.297413	0.599408	-0.529285	0.399205	0.221326	1.61362	-0.73482	0.513507	1.51906	1.05424	-0.270713	0.783643	-1.49464	-1.38937	-0.146504	-1.11756	-0.049462	0.947268	0.555451	-1.28408	0.393959	-0.0549096	-0.389822	0.540419	0.115071	0.529355	0.845389	0	0	0	0	0	0	0	0
0	0	0	0	5.40161	0.590854	1.944	0.267635	0.578143	-0.204151	0.721219	1.51074	-1.2539	0.0220303	0.338839	-0.27882	1.60792	0.622811	-0.794905	-0.578355	1.35009	0.423064	0.0941593	-0.500024	-0.0961413	0.118383	-0.716782	0.695396	0.647386	0.655672	0.317556	-0.0429476	0	0	0	0	0	0	0	0
0	0	0	0	0	4.15332	1.08302	0.200564	1.14942	-0.924692	-0.489855	0.0234973	-0.850839	0.0597394	2.06664	-1.77262	-0.146158	-1.45565	0.453563	-0.330484	1.32363	0.768898	0.171806	0.00258188	1.20374	-0.174228	-0.147967	0.393476	0.787751	-0.554103	-1.12272	-0.617396	0	0	0	0	0	0	0	0
0	0	0	0	0	0	-5.62118	-0.126851	0.407196	-0.226566	0.0376154	0.13155	-0.598349	-0.909286	0.39243	-1.94235	1.2555	-0.88799	-0.199872	-0.858287	0.385012	0.364449	2.07785	-0.356982	-0.896241	-0.654261	-0.0176855	0.99573	-0.0106352	1.49243	-0.416079	-0.104909	0	0	0	0	0	0	0	0
0	0	0	0	0	0	0	-4.48717	-1.33717	0.457154	-0.516783	0.966473	-1.86783	0.041746	1.61151	-0.858185	0.413377	-1.13446	-1.53652	-0.0204963	2.7857	-0.66392	-0.0611935	-0.606085	0.983269	0.856003	0.186178	1.33842	1.0473	1.40219	0.313014	-0.642657	0	0	0	0	0	0	0	0
0	0	0	0	0	0	0	0	-3.75597	-1.12672	1.60344	-0.87335	0.754947	0.13258	-0.196035	0.414047	0.413672	-0.0361419	0.614032	0.78687	-0.413792	0.0830381	0.0619018	-0.691275	0.871813	0.278369	-0.212926	1.08818	-0.389231	-0.521449	0.0477827	-0.876811	0	0	0	0	0	0	0	0
0	0	0	0	0	0	0	0	0	-4.02135	0.602384	-1.66972	-0.227763	0.699212	0.433662	0.257547	0.0278067	-1.36334	-0.546678	0.635463	0.013863	1.07579	0.560628	1.76529	0.358114	1.41061	-1.07671	0.305411	1.04828	-0.305666	1.71261	1.3196	0	0	0	0	0	0	0	0
0	0	0	0	0	0	0	0	0	0	-5.07941	-0.827271	0.576008	-0.781215	-0.349744	-1.49386	1.86891	1.58789	0.166377	-0.15018	-1.03293	-0.985081	0.233651	-0.404276	-1.13074	-0.108343	0.972936	0.567456	-0.0560247	1.33228	-0.489944	-0.596355	0	0	0	0	0	0	0	0
0	0	0	0	0	0	0	0	0	0	0	-3.38696	-0.660344	0.484549	-0.685151	-1.24487	-0.143291	1.28988	-1.97923	-0.497664	0.771775	0.987594	-0.0926342	2.27183	-0.114071	-1.64739	0.0161756	-1.22686	0.021042	-0.318278	-0.511838	0.215044	0	0	0	0	0	0	0	0
0	0	0	0	0	0	0	0	0	0	0	0	-4.01779	0.919189	-0.205014	-1.90701	-0.0933269	-0.441045	0.374846	-0.528426	-1.75245	-0.663124	0.739636	0.485372	0.04492	-0.241579	-1.46436	-1.24258	1.27383	0.50844	-0.675025	0.827847	0	0	0	0	0	0	0	0
0	0	0	0	0	0	0	0	0	0	0	0	0	-4.17745	-0.323516	-0.584498	0.0712788	-0.626537	0.220563	-0.669751	0.311019	-0.247226	0.0381474	-1.18842	1.53399	-0.242468	-0.426919	0.045068	1.50558	-0.610796	-0.833816	-0.281686	0	0	0	0	0	0	0	0
0	0	0	0	0	0	0	0	0	0	0	0	0	0	4.14941	0.396952	-0.955688	0.631998	1.5261	1.59147	-1.28394	0.369504	-1.13617	-0.26823	-1.20322	-0.450911	0.501285	1.16773	1.29318	1.58931	-2.52649	-1.13705	0	0	0	0	0	0	0	0
0	0	0	0	0	0	0	0	0	0	0	0	0	0	0	-4.59152	-0.797124	2.58578	0.899666	-0.756884	-1.3575	-0.481406	0.604951	1.4124	-2.02844	-0.546185	1.0672	-0.828851	1.08724	-0.360412	-0.0845295	-0.726703	0	0	0	0	0	0	0	0
0	0	0	0	0	0	0	0	0	0	0	0	0	0	0	0	-3.63375	-0.71972	2.08894	0.049102	-0.496952	0.00426017	-0.956951	1.6219	-0.484342	-0.945854	1.28211	-0.980773	0.564559	0.960403	-1.80424	0.040214	0	0	0	0	0	0	0	0
0	0	0	0	0	0	0	0	0	0	0	0	0	0	0	0	0	3.71665	1.51322	-1.09141	0.241278	1.2403	0.354714	-1.138	-1.53874	-1.37759	0.929634	0.50911	-0.11795	-0.77739	0.864065	-1.46366	0	0	0	0	0	0	0	0
0	0	0	0	0	0	0	0	0	0	0	0	0	0	0	0	0	0	3.58181	-0.352983	-0.938479	-2.3194	1.20163	0.990849	1.27741	-0.898968	0.168867	-0.0809985	-0.254879	0.225004	0.395705	0.0374593	0	0	0	0	0	0	0	0
0	0	0	0	0	0	0	0	0	0	0	0	0	0	0	0	0	0	0	-4.21254	-0.965372	-0.407888	-0.564089	-2.28957	0.342203	1.7596	-0.146802	1.13466	-0.111957	0.855548	0.512291	-0.541786	0	0	0	0	0	0	0	0
0	0	0	0	0	0	0	0	0	0	0	0	0	0	0	0	0	0	0	0	2.97646	0.0611786	-0.897513	-0.315015	0.126508	-2.1622	-1.19311	-1.19775	-0.597946	0.689281	-0.528528	0.0598024	0	0	0	0	0	0	0	0
0	0	0	0	0	0	0	0	0	0	0	0	0	0	0	0	0	0	0	0	0	-3.59569	-0.254122	-0.237454	-0.754221	1.31227	-0.995599	-0.295017	-0.196259	-0.166744	-0.821062	0.405473	0	0	0	0	0	0	0	0
0	0	0	0	0	0	0	0	0	0	0	0	0	0	0	0	0	0	0	0	0	0	-3.29288	0.192536	-0.6644	0.141261	0.395701	1.52606	-0.93813	-0.114383	-0.159395	-0.445686	0	0	0	0	0	0	0	0
0	0	0	0	0	0	0	0	0	0	0	0	0	0	0	0	0	0	0	0	0	0	0	4.90292	-0.219183	0.4371	-0.909497	0.184289	-1.05587	0.536626	-0.866849	1.18641	0	0	0	0	0	0	0	0
0	0	0	0	0	0	0	0	0	0	0	0	0	0	0	0	0	0	0	0	0	0	0	0	-3.29617	1.41257	-1.73787	-0.248603	-0.0152242	-2.21334	0.60319	-0.509457	0	0	0	0	0	0	0	0
0	0	0	0	0	0	0	0	0	0	0	0	0	0	0	0	0	0	0	0	0	0	0	0	0	1.9871	-2.04145	-0.166037	1.05501	0.453586	-2.20579	-1.08534	0	0	0	0	0	0	0	0
0	0	0	0	0	0	0	0	0	0	0	0	0	0	0	0	0	0	0	0	0	0	0	0	0	0	-3.40426	-0.257608	-0.293652	0.536785	-1.53863	-1.35857	0	0	0	0	0	0	0	0
0	0	0	0	0	0	0	0	0	0	0	0	0	0	0	0	0	0	0	0	0	0	0	0	0	0	0	2.66459	-2.46634	0.29054	0.49166	-0.444769	0	0	0	0	0	0	0	0
0	0	0	0	0	0	0	0	0	0	0	0	0	0	0	0	0	0	0	0	0	0	0	0	0	0	0	0	-1.14657	0.35794	1.60529	-0.323399	0	0	0	0	0	0	0	0
0	0	0	0	0	0	0	0	0	0	0	0	0	0	0	0	0	0	0	0	0	0	0	0	0	0	0	0	0	1.63641	-0.661981	0.374364	0	0	0	0	0	0	0	0
0	0	0	0	0	0	0	0	0	0	0	0	0	0	0	0	0	0	0	0	0	0	0	0	0	0	0	0	0	0	0.792843	-0.364699	0	0	0	0	0	0	0	0
0	0	0	0	0	0	0	0	0	0	0	0	0	0	0	0	0	0	0	0	0	0	0	0	0	0	0	0	0	0	0	-1.45436	0	0	0	0	0	0	0	0
0	0	0	0	0	0	0	0	0	0	0	0	0	0	0	0	0	0	0	0	0	0	0	0	0	0	0	0	0	0	0	0	0	0	0	0	0	0	0	0
6.32522	1.20749	0.7606	0.68981	-0.492411	0.643444	1.56679	-0.0557198	0.598026	-0.713009	-0.271757	-1.12464	1.65329	-2.2062	-1.18815	-0.369891	0.228382	1.44024	0.400056	-1.05778	-1.20224	-0.93796	1.05324	-1.73154	-0.0464669	-0.58215	0.200012	1.47903	-0.717394	-0.237347	-1.50739	0.751451	-1.62414	0	0	0	0	0	0	0
0	-4.33308	0.871364	0.248271	1.0941	-1.52609	-0.216676	-0.600371	2.12984	-0.361086	-0.0677263	-1.48203	2.16012	-0.28248	0.362052	-1.28679	-0.506794	1.44223	1.19111	0.713983	-0.322766	-1.26005	-0.670991	0.035908	-1.13537	-2.43281	-1.97658	0.380773	-0.433671	-0.696055	0.438751	0.817514	-0.0879964	0	0	0	0	0	0	0
0	0	5.3462	0.437126	-1.72975	1.68727	-0.631128	-0.890655	1.1139	-0.721192	-0.122175	-0.0734195	-1.72913	-2.24391	-0.672527	1.23609	1.19893	0.458008	0.832357	-0.522487	-1.38105	-0.560612	-1.83157	-1.53	0.0781635	0.530723	-0.98588	-0.192172	1.82125	-0.97445	2.08182	0.0853872	-0.31255	0	0	0	0	0	0	0
0	0	0	5.70335	-0.361485	1.13911	-1.64309	1.122	-0.491146	0.689837	-2.73828	0.202922	-1.19392	-0.365483	-1.30182	0.71803	0.536906	0.559853	0.157731	-1.33364	0.307413	0.149551	1.0718	-1.76243	-1.03986	-0.816239	0.525561	-0.770401	-1.435	0.305423	-0.619406	2.70092	0.847406	0	0	0	0	0	0	0
0	0	0	0	4.51378	0.434909	0.0860943	-1.9164	-1.81371	0.192454	1.67216	-0.476936	-1.19545	0.74102	2.26774	-0.913252	0.99345	-0.740933	-1.81586	-2.06354	0.137949	-0.669442	0.941405	1.50127	-0.233226	0.0591589	-0.979555	0.664261	-1.01596	-1.01934	1.81497	-0.72478	0.0182031	0	0	0	0	0	0	0
0	0	0	0	0	5.08277	0.321687	-0.000181938	1.05472	0.486448	-0.163681	0.126143	1.11247	0.0536766	2.19326	1.36912	0.172907	1.28075	-0.469245	-0.998358	0.158603	0.239042	-0.125428	1.01946	-1.13249	-0.627083	-0.751734	0.610367	0.525421	1.99976	-1.12399	-0.951047	-0.757655	0	0	0	0	0	0	0
0	0	0	0	0	0	-5.19861	-1.60492	0.0255498	-0.936154	0.444589	0.447462	0.900258	-0.0993686	1.55805	-0.471372	-0.261866	-0.543831	-1.24266	0.254577	-0.612403	-0.631539	0.228338	0.121888	0.367113	-1.19728	1.19827	-0.420785	0.538709	2.23012	0.718715	0.767865	0.283239	0	0	0	0	0	0	0
0	0	0	0	0	0	0	-5.02179	0.0881509	0.549175	0.263225	0.857329	-0.134313	0.193555	0.831034	0.742461	-0.742725	-1.4887	0.661268	2.11747	-1.25485	-0.0567536	2.69334	0.910821	0.117286	0.777782	2.35827	-1.11676	-0.0332828	-0.000610407	-0.346494	-0.791615	-0.079372	0	0	0	0	0	0	0
0	0	0	0	0	0	0	0	-4.89454	-1.85324	-0.496906	-1.14118	-0.722776	0.532273	-0.900334	-0.644484	-0.954252	-0.620993	-0.707068	-0.1463	-0.34593	-1.075	0.297605	-1.13287	1.69323	-0.98869	-0.161886	0.689904	1.03288	-0.824845	1.0738	1.42443	0.804134	0	0	0	0	0	0	0
0	0	0	0	0	0	0	0	0	4.09552	-0.234682	-1.0527	1.27028	0.135443	0.597709	-1.99315	-1.20805	0.557064	-0.0832201	0.181902	-1.49964	1.03026	0.78039	1.54788	-0.258634	-0.439514	-0.160199	0.727927	-0.714463	0.970651	-1.55372	1.0292	0.385379	0	0	0	0	0	0	0
0	0	0	0	0	0	0	0	0	0	-3.54721	-0.86235	-0.182648	-0.853197	0.112695	-3.06792	0.58048	-0.49701	0.303342	-1.52452	1.11097	2.04848	0.89324	-0.157301	-0.0261636	-0.00343829	0.809766	1.52358	-2.67781	1.04622	0.33516	0.869917	-1.41649	0	0	0	0	0	0	0
0	0	0	0	0	0	0	0	0	0	0	-4.75021	1.58215	-1.63666	-0.139362	0.710595	-1.982	-0.18799	-1.49129	0.358177	-0.180211	-0.0876025	0.62279	0.150887	-2.27721	-1.08762	-0.479505	1.209	-1.67103	-2.36215	-0.723139	0.616702	-1.2484	0	0	0	0	0	0	0
0	0	0	0	0	0	0	0	0	0	0	0	4.33766	0.41116	-0.677424	-0.163686	0.823802	-0.898903	-0.555067	0.00439185	0.200111	0.817608	0.313644	-1.10174	-0.67641	-0.578705	-1.1168	0.93827	-0.517087	1.00179	1.04884	-2.32067	-0.450839	0	0	0	0	0	0	0
0	0	0	0	0	0	0	0	0	0	0	0	0	5.32874	0.349888	1.66028	-1.42749	0.189369	-0.0816862	-0.66081	-0.426212	-0.289474	-0.475519	-1.84423	1.20327	0.503569	-0.771038	-0.582894	-0.00581131	-2.32669	0.328386	1.52928	-0.57708	0	0	0	0	0	0	0
0	0	0	0	0	0	0	0	0	0	0	0	0	0	4.5636	-1.51623	0.832658	0.00312525	0.616241	-0.995302	-0.525892	-1.01082	2.25958	0.0599243	0.0120428	1.1161	0.517646	-0.592022	1.37813	-1.19338	-0.863058	-2.23468	0.819743	0	0	0	0	0	0	0
0	0	0	0	0	0	0	0	0	0	0	0	0	0	0	4.30681	0.840105	-0.683416	-0.668785	2.42503	0.659976	-0.460141	0.650886	-2.18982	0.593505	0.739483	-1.12968	1.13921	-0.0585242	2.35726	0.464623	0.33936	-1.58386	0	0	0	0	0	0	0
0	0	0	0	0	0	0	0	0	0	0	0	0	0	0	0	-3.50621	-1.04821	0.931176	-1.17793	0.0994184	0.372403	-0.812187	1.10981	-0.41976	-1.10946	0.233273	-0.390538	-0.636349	-0.885307	0.976673	-0.141619	0.549408	0	0	0	0	0	0	0
0	0	0	0	0	0	0	0	0	0	0	0	0	0	0	0	0	4.81459	-0.337988	0.568757	-1.7715	-0.0526463	-0.919012	-0.364116	0.558049	-2.47065	-1.11506	-0.718182	0.628575	-0.21707	0.44061	-0.837003	0.131123	0	0	0	0	0	0	0
0	0	0	0	0	0	0	0	0	0	0	0	0	0	0	0	0	0	3.68051	-0.479507	-1.16657	-0.927797	-1.73505	-0.597428	-1.59884	-0.841324	-0.257201	-0.141424	1.38863	-0.590698	-1.27959	-0.14721	0.675124	0	0	0	0	0	0	0
0	0	0	0	0	0	0	0	0	0	0	0	0	0	0	0	0	0	0	4.11136	0.961237	1.43536	-1.61253	-1.41195	0.240842	2.11958	1.77981	1.82135	0.823787	1.04503	-0.618986	-0.578808	-1.32382	0	0	0	0	0	0	0
0	0	0	0	0	0	0	0	0	0	0	0	0	0	0	0	0	0	0	0	-3.99282	1.79808	-1.19407	0.694465	0.558564	1.51704	-0.613189	0.835006	0.175167	0.0241046	-0.511985	-0.971256	0.46453	0	0	0	0	0	0	0
0	0	0	0	0	0	0	0	0	0	0	0	0	0	0	0	0	0	0	0	0	-2.57884	0.0349071	-0.761348	0.0871353	-0.00263486	0.599087	0.92012	0.0757056	-1.46176	1.14687	-0.131485	0.309214	0	0	0	0	0	0	0
0	0	0	0	0	0	0	0	0	0	0	0	0	0	0	0	0	0	0	0	0	0	2.72506	1.22929	-0.480755	-0.933117	-0.716508	-0.542605	0.254838	0.192832	0.0363177	-1.07524	0.211362	0	0	0	0	0	0	0
0	0	0	0	0	0	0	0	0	0	0	0	0	0	0	0	0	0	0	0	0	0	0	2.84014	0.553405	0.231917	0.420451	1.14499	0.537246	-1.24043	0.166171	-0.888576	-0.476203	0	0	0	0	0	0	0
0	0	0	0	0	0	0	0	0	0	0	0	0	0	0	0	0	0	0	0	0	0	0	0	-3.24035	-0.117367	-0.686556	0.618937	-0.1618	-0.00694295	1.86025	0.30434	-0.657334	0	0	0	0	0	0	0
0	0	0	0	0	0	0	0	0	0	0	0	0	0	0	0	0	0	0	0	0	0	0	0	0	-3.10713	-1.47153	1.42846	0.00268595	1.50541	-2.36865	0.708673	-0.756618	0	0	0	0	0	0	0
0	0	0	0	0	0	0	0	0	0	0	0	0	0	0	0	0	0	0	0	0	0	0	0	0	0	1.67522	-0.495315	-2.04837	0.241906	0.317694	-0.133475	0.801895	0	0	0	0	0	0	0
0	0	0	0	0	0	0	0	0	0	0	0	0	0	0	0	0	0	0	0	0	0	0	0	0	0	0	2.895	-0.803027	0.60604	0.458891	0.852854	-0.347705	0	0	0	0	0	0	0
0	0	0	0	0	0	0	0	0	0	0	0	0	0	0	0	0	0	0	0	0	0	0	0	0	0	0	0	-1.7904	-0.560428	-1.50604	-0.834022	-0.143299	0	0	0	0	0	0	0
0	0	0	0	0	0	0	0	0	0	0	0	0	0	0	0	0	0	0	0	0	0	0	0	0	0	0	0	0	2.42392	0.174083	-3.1694	-0.985825	0	0	0	0	0	0	0
0	0	0	0	0	0	0	0	0	0	0	0	0	0	0	0	0	0	0	0	0	0	0	0	0	0	0	0	0	0	1.41801	-0.158684	0.847686	0	0	0	0	0	0	0
0	0	0	0	0	0	0	0	0	0	0	0	0	0	0	0	0	0	0	0	0	0	0	0	0	0	0	0	0	0	0	-1.34609	-0.167321	0	0	0	0	0	0	0
0	0	0	0	0	0	0	0	0	0	0	0	0	0	0	0	0	0	0	0	0	0	0	0	0	0	0	0	0	0	0	0	-0.928919	0	0	0	0	0	0	0
0	0	0	0	0	0	0	0	0	0	0	0	0	0	0	0	0	0	0	0	0	0	0	0	0	0	0	0	0	0	0	0	0	0	0	0	0	0	0	0
6.26551	1.86889	-0.0588886	-0.253529	-0.452946	-1.25443	-0.252632	-0.235379	0.922998	0.196959	0.483942	-0.205156	-0.791769	-1.05138	-0.267895	-0.699377	1.26723	-0.0903529	-2.79018	-0.123798	-1.26242	-0.131291	-0.240239	1.73497	-0.618516	0.124171	0.0309216	-1.82188	1.65021	-1.631	1.32385	0.886834	-1.49335	-0.7225	0	0	0	0	0	0
0	7.08768	-0.117879	-0.593091	-1.46875	1.73451	-0.499257	-0.213943	0.76453	0.675968	-1.27949	-0.148999	-0.161126	-0.0863745	-1.10134	1.17513	-0.270504	0.817926	0.0898711	-0.148418	0.158309	-0.149508	0.248005	-0.716567	-0.772422	1.14199	0.113211	0.564277	-0.730796	-0.917649	0.0105176	-1.63759	0.192102	0.178903	0	0	0	0	0	0
0	0	-4.93463	0.727913	1.07239	-0.0921243	1.51896	0.758633	0.822649	0.852477	-0.110845	-1.56885	1.47181	-0.786475	-0.691459	0.402571	-0.501833	1.07619	-0.993779	0.24307	-1.29824	-0.932259	-0.994453	0.0630137	-0.0724918	1.21295	0.789551	-0.825303	-1.47615	1.88253	0.0984645	0.00570862	-0.0389931	0.30478	0	0	0	0	0	0
0	0	0	5.93172	1.67326	0.978889	1.07537	0.770702	0.209616	-1.4971	-1.14201	-0.358826	-0.69027	-0.550462	-1.91492	1.19834	0.883697	0.269355	-0.32921	1.31871	1.54882	0.948188	-0.505629	0.158732	-0.15102	1.19937	-2.3158	-0.741698	-0.264924	0.599309	2.46829	-3.37212	-0.733683	-1.09148	0	0	0	0	0	0
0	0	0	0	-5.99612	0.0176503	1.76393	-0.203398	1.71341	-1.77921	1.26242	-0.731381	0.320222	-0.533419	-0.270578	-0.361041	0.705767	-0.211225	-1.54743	2.43554	2.15915	1.41323	-0.502219	0.657895	0.481194	0.342551	-0.213696	0.245232	0.311893	0.967637	0.246591	0.421167	-0.43171	0.430122	0	0	0	0	0	0
0	0	0	0	0	-5.32482	-0.542318	0.595021	-0.462702	0.257308	1.23706	-1.58064	0.431412	0.582864	2.34382	-1.64535	0.326491	0.0298511	0.13065	1.16654	-0.964329	2.11374	0.890787	-0.503177	-0.652078	-0.503055	-0.833818	-0.287147	-1.08677	-0.0393425	-1.16694	0.180659	0.661925	-1.59568	0	0	0	0	0	0
0	0	0	0	0	0	6.09731	0.814464	0.443695	0.605118	-0.363598	0.330571	-0.110897	1.13953	-1.05337	0.622945	0.686919	0.13087	0.0369188	-0.0733978	-0.414759	1.06107	0.551904	0.421917	-0.137212	-0.0975429	0.53871	0.294315	-0.0789878	-1.22517	-0.924495	0.822295	-0.899652	-0.0684261	0	0	0	0	0	0
0	0	0	0	0	0	0	-5.90309	1.36929	-0.902176	0.454867	1.15265	-0.566269	0.222172	-0.583863	0.314318	-0.76033	-0.220538	-0.736424	-1.2778	-1.97018	-0.0777886	0.0684981	-1.22329	0.76737	-1.03306	0.412294	-0.102222	-0.0646014	0.597148	0.409206	1.93104	0.139073	0.265624	0	0	0	0	0	0
0	0	0	0	0	0	0	0	-4.31949	-0.308897	0.575975	1.05234	-0.46878	-0.122351	0.582129	1.08988	2.3897	-0.109303	1.40805	-0.555181	1.37727	-0.676323	1.66453	-0.0518686	-0.383045	-0.129769	-0.499016	-0.084123	-1.84251	1.58295	1.5678	1.50491	-1.4113	-0.305662	0	0	0	0	0	0
0	0	0	0	0	0	0	0	0	5.63686	-0.905814	1.51808	-2.69078	0.680489	0.0134898	0.101411	-0.28528	-0.87394	0.44062	-1.27363	1.85017	-0.928711	-0.775653	0.503057	0.706835	-0.0997092	-1.42187	1.25993	0.242138	-1.01678	1.88525	-1.55948	0.493601	-1.19389	0	0	0	0	0	0
0	0	0	0	0	0	0	0	0	0	3.72228	0.203229	-1.05687	0.305986	0.41732	0.458402	0.65183	1.21871	0.391579	0.339267	1.03734	0.535552	-0.104695	0.32155	-0.587205	1.42752	0.366418	0.368398	1.24794	-0.639334	-0.22432	2.17129	0.593963	-0.632416	0	0	0	0	0	0
0	0	0	0	0	0	0	0	0	0	0	-4.44526	-0.520091	1.04501	0.308075	0.251981	0.612229	-0.647121	-0.535018	-1.44519	-1.19466	1.77941	-0.194535	0.159702	-0.308755	-0.330947	0.211745	0.78906	-0.740094	0.252104	-1.13513	1.56806	-2.242	-0.348388	0	0	0	0	0	0
0	0	0	0	0	0	0	0	0	0	0	0	-3.68986	1.28459	0.486504	0.0191169	0.428284	-1.27175	-0.434888	-1.42423	-0.0994139	-0.369746	0.233396	-0.797002	-1.22935	1.87192	1.69014	-0.419429	-0.216948	-0.989122	0.0892993	-0.0158619	0.811122	-0.678194	0	0	0	0	0	0
0	0	0	0	0	0	0	0	0	0	0	0	0	3.76161	-0.689652	-0.756082	-0.656849	0.894639	-0.199743	-0.67044	0.601686	0.658179	-0.222609	0.630083	0.786597	-0.926347	0.348136	1.62003	0.956388	1.05081	1.39082	-1.64942	-1.68282	0.89594	0	0	0	0	0	0
0	0	0	0	0	0	0	0	0	0	0	0	0	0	5.59093	-0.758875	-0.496953	0.610463	0.53567	1.3118	0.287225	-1.22864	-1.29096	0.0173203	0.181041	0.694164	-1.22494	-2.4032	0.375612	2.14088	0.168752	1.76467	-0.925032	-0.627522	0	0	0	0	0	0
0	0	0	0	0	0	0	0	0	0	0	0	0	0	0	-3.70442	0.568631	-0.672763	0.292848	0.114342	-0.979454	-0.853431	-0.0298814	1.33649	1.18428	0.857851	0.187792	0.954	-1.27468	0.20508	-1.32198	-0.758384	0.848726	-2.32321	0	0	0	0	0	0
0	0	0	0	0	0	0	0	0	0	0	0	0	0	0	0	-4.29129	-0.749682	-0.218969	0.362234	1.96446	0.313489	0.0545316	-1.18503	-1.5947	0.549363	-0.888101	-1.02585	0.731252	-0.298133	1.19329	0.812628	-0.912448	-0.717975	0	0	0	0	0	0
0	0	0	0	0	0	0	0	0	0	0	0	0	0	0	0	0	-3.29246	-0.226839	-0.569008	-0.0821971	-1.23299	1.26569	0.959962	-1.75265	0.662319	0.446715	1.26372	-1.54343	-1.46439	0.874649	0.905294	-0.280742	0.0198098	0	0	0	0	0	0
0	0	0	0	0	0	0	0	0	0	0	0	0	0	0	0	0	0	-3.10179	-0.458288	-1.4025	1.11835	0.49031	-0.230666	0.374156	-1.02226	-2.11446	-0.231019	0.342223	-0.598212	0.8567	-0.822732	-0.171583	0.229023	0	0	0	0	0	0
0	0	0	0	0	0	0	0	0	0	0	0	0	0	0	0	0	0	0	3.85727	1.17022	1.08779	2.03874	-2.72294	-0.576813	1.76938	1.11913	0.774208	0.184828	0.0831236	-0.600967	0.551723	-0.219791	0.486713	0	0	0	0	0	0
0	0	0	0	0	0	0	0	0	0	0	0	0	0	0	0	0	0	0	0	-4.97139	0.604431	2.06307	0.251943	1.12907	-1.25484	-0.661353	0.266216	0.843793	0.0342984	1.42808	0.902558	0.0146882	0.655733	0	0	0	0	0	0
0	0	0	0	0	0	0	0	0	0	0	0	0	0	0	0	0	0	0	0	0	-2.69609	-0.400969	0.44236	0.77902	-1.03189	-0.974583	-0.875146	0.601482	-1.10346	0.438862	0.647001	0.33105	1.85546	0	0	0	0	0	0
0	0	0	0	0	0	0	0	0	0	0	0	0	0	0	0	0	0	0	0	0	0	-4.14246	0.633003	-0.69776	0.824569	0.205699	-0.866742	-0.285698	-0.852121	-1.10375	1.44138	0.764683	0.499226	0	0	0	0	0	0
0	0	0	0	0	0	0	0	0	0	0	0	0	0	0	0	0	0	0	0	0	0	0	-2.77026	-0.12445	0.665875	-1.17622	-1.79701	-0.586838	1.00689	0.729255	-1.39401	0.796492	0.946324	0	0	0	0	0	0
0	0	0	0	0	0	0	0	0	0	0	0	0	0	0	0	0	0	0	0	0	0	0	0	4.03398	1.45311	1.50175	-0.262069	-1.15881	-0.324053	-0.161473	-0.523581	-1.6851	-2.53486	0	0	0	0	0	0
0	0	0	0	0	0	0	0	0	0	0	0	0	0	0	0	0	0	0	0	0	0	0	0	0	-1.48252	-1.04534	-2.07574	0.903949	1.54986	-0.541652	-0.687839	0.987649	0.0290438	0	0	0	0	0	0
0	0	0	0	0	0	0	0	0	0	0	0	0	0	0	0	0	0	0	0	0	0	0	0	0	0	-2.36876	0.266802	1.04693	-1.40723	2.04548	2.41208	0.84056	0.364423	0	0	0	0	0	0
0	0	0	0	0	0	0	0	0	0	0	0	0	0	0	0	0	0	0	0	0	0	0	0	0	0	0	2.30123	0.798854	2.10095	0.494967	-1.58475	0.457176	1.66894	0	0	0	0	0	0
0	0	0	0	0	0	0	0	0	0	0	0	0	0	0	0	0	0	0	0	0	0	0	0	0	0	0	0	2.57806	-0.862359	1.42691	0.463324	0.437458	1.27595	0	0	0	0	0	0
0	0	0	0	0	0	0	0	0	0	0	0	0	0	0	0	0	0	0	0	0	0	0	0	0	0	0	0	0	-2.82998	-0.517934	0.766638	-0.755869	0.185521	0	0	0	0	0	0
0	0	0	0	0	0	0	0	0	0	0	0	0	0	0	0	0	0	0	0	0	0	0	0	0	0	0	0	0	0	3.0784	-0.0476056	-0.464509	2.12362	0	0	0	0	0	0
0	0	0	0	0	0	0	0	0	0	0	0	0	0	0	0	0	0	0	0	0	0	0	0	0	0	0	0	0	0	0	0.572351	0.161183	0.55847	0	0	0	0	0	0
0	0	0	0	0	0	0	0	0	0	0	0	0	0	0	0	0	0	0	0	0	0	0	0	0	0	0	0	0	0	0	0	-0.59169	0.879087	0	0	0	0	0	0
0	0	0	0	0	0	0	0	0	0	0	0	0	0	0	0	0	0	0	0	0	0	0	0	0	0	0	0	0	0	0	0	0	-0.292083	0	0	0	0	0	0
0	0	0	0	0	0	0	0	0	0	0	0	0	0	0	0	0	0	0	0	0	0	0	0	0	0	0	0	0	0	0	0	0	0	0	0	0	0	0	0
-6.08666	1.34066	-0.618628	1.0694	1.61176	0.720467	-1.24824	-2.15887	0.68532	-0.193639	1.33878	0.269507	0.253779	0.190451	-0.759496	-1.71785	0.173973	-1.02619	-1.16332	0.0468014	-0.441857	1.60029	-1.77277	-0.26506	-0.252311	1.46832	-0.635721	-1.12153	-0.350432	1.81051	1.14606	-0.02084	0.122062	0.211219	-0.693886	0	0	0	0	0
0	5.77678	0.852917	0.810381	1.11035	-0.394342	-0.662746	-0.36633	1.29546	-1.69303	1.20522	0.852333	-0.079475	-0.357458	0.61126	-0.859329	-1.28056	-1.0783	-0.757858	0.569243	-0.507382	-0.450587	-1.37168	0.436735	-1.33637	0.411534	-0.340518	-2.31195	-2.09727	0.258211	-1.43384	-1.38281	2.55656	1.59627	0.775507	0	0	0	0	0
0	0	4.87144	-0.742076	0.749471	-0.802106	-1.09654	-0.809278	-0.175669	1.54688	0.797264	0.305717	0.990953	0.124212	-0.382122	1.93274	1.59333	-0.643115	-0.785795	-1.90816	-0.84392	0.647805	-0.885163	0.851217	-1.42633	-0.548642	0.050584	0.995366	-3.25958	1.95741	0.266564	1.49984	-1.21121	-0.722081	-0.886031	0	0	0	0	0
0	0	0	5.76079	0.0212754	1.12598	1.64214	-0.178377	-0.158873	0.337118	0.489139	-0.430825	-0.632547	0.370893	1.03251	-1.4962	1.69296	0.999295	-0.305447	-1.69912	1.12783	0.428592	-0.459898	0.550398	2.49314	0.656433	-0.893347	-0.843531	2.06068	0.308019	0.234616	-1.54236	-1.05994	1.84864	0.136663	0	0	0	0	0
0	0	0	0	-5.46226	0.104337	-0.650242	-0.432172	-0.652313	-0.503546	1.07479	1.27123	0.44782	-1.0079	0.698421	0.0418641	-1.49096	0.0483115	-1.6611	-2.34482	-1.00358	-0.272637	0.560377	-0.359624	-0.942339	1.24152	-0.266521	0.80493	-1.66765	-0.376806	-0.749533	-0.589536	0.0857628	-0.266867	-0.382308	0	0	0	0	0
0	0	0	0	0	-6.61123	0.659494	-0.637042	0.831159	-0.417	-1.54536	0.729269	-0.889033	1.62631	0.17817	-0.124983	0.627104	-0.866934	2.50859	-1.9543	-1.41024	-0.125918	1.42822	2.53927	-1.2056	-0.182705	-0.13027	-1.50701	-0.210162	0.400736	-0.593466	1.48009	-0.218231	0.630595	-0.618102	0	0	0	0	0
0	0	0	0	0	0	5.60524	0.971401	0.147128	2.12462	-1.36506	0.653329	0.911496	0.664249	-1.23098	-0.992652	0.0641067	0.09901	0.169817	-0.0497767	-0.262392	-1.22283	0.400503	-1.07664	-1.54087	-2.35224	1.41915	-0.521352	-0.44192	-0.1021	1.61297	1.16287	-0.773731	1.03403	-0.870451	0	0	0	0	0
0	0	0	0	0	0	0	4.77508	-0.658428	-0.0668102	-0.0154813	-1.44436	1.81268	-0.21591	-0.651682	1.70265	0.59891	-0.0932591	-0.018265	0.00378715	0.482072	-3.48253	1.37029	0.561853	-1.60767	-1.77661	-0.228091	-0.169054	-0.109596	-0.0185431	-0.326067	0.548765	0.0962131	-0.0738769	-0.928573	0	0	0	0	0
0	0	0	0	0	0	0	0	4.50251	0.448476	-0.0926506	2.08255	1.26497	-0.986296	-0.12062	-0.528582	-1.09285	-0.0780672	-0.412189	0.118388	0.957777	1.27332	-1.51624	1.5979	0.485571	2.49781	-0.0633438	0.772717	0.583801	-1.13186	0.957461	-1.08483	0.615991	-0.868011	-0.400932	0	0	0	0	0
0	0	0	0	0	0	0	0	0	4.79146	0.370952	2.48935	0.930531	-0.299776	0.0468139	-0.466171	0.146973	2.37382	0.19198	-0.622634	1.82449	-0.213324	0.358731	-0.157719	-0.0774243	1.50172	0.846716	0.303613	1.99912	0.210416	0.246212	0.503989	-0.334115	0.512934	0.652888	0	0	0	0	0
0	0	0	0	0	0	0	0	0	0	-5.20809	0.832778	0.774148	-0.740237	-0.607039	0.161304	0.585887	1.04193	0.378399	1.41058	-0.514509	-0.906623	-0.186022	0.489018	-1.2058	0.805823	0.283787	0.146524	0.945999	-0.280367	-0.902978	0.639409	1.91589	0.198817	-0.088745	0	0	0	0	0
0	0	0	0	0	0	0	0	0	0	0	4.38422	-0.605065	0.494937	-0.800769	-0.502973	-0.783898	-1.3283	0.389833	-0.304671	2.21227	-0.958153	-0.0511192	1.22105	0.839363	0.217258	-1.00459	1.47392	-0.65701	-1.381	0.904366	-0.0396489	-0.154649	0.287062	-0.126761	0	0	0	0	0
0	0	0	0	0	0	0	0	0	0	0	0	5.14427	-0.877356	-0.421444	1.31588	0.508208	0.68907	-1.80969	-0.0963032	1.17912	1.39025	1.86476	-0.114515	-0.199737	-2.57892	-0.217045	-0.864972	0.565401	0.0672755	-0.891015	1.41493	0.644064	-1.6269	0.0673255	0	0	0	0	0
0	0	0	0	0	0	0	0	0	0	0	0	0	5.8385	-0.441629	0.417174	-1.74029	0.0302181	-1.47482	0.161994	-1.34898	-0.043443	0.810924	-1.66023	-0.206842	0.412144	-1.466	0.195043	-0.834797	0.448109	0.69875	0.657912	0.967186	-0.00163621	-0.808517	0	0	0	0	0
0	0	0	0	0	0	0	0	0	0	0	0	0	0	-4.47402	-0.832718	0.337027	1.39208	-0.662058	2.15198	-0.170954	-0.648107	-0.0721583	-2.00479	-0.0673266	-1.30977	1.06585	0.982959	-0.287726	0.850917	-0.116924	-1.55488	0.787109	0.369396	-0.784013	0	0	0	0	0
0	0	0	0	0	0	0	0	0	0	0	0	0	0	0	-4.34776	-0.384386	0.974888	0.764787	-1.32367	-0.0466613	-0.53904	0.664062	-0.355681	0.28418	-1.24128	1.27572	1.9129	-0.357993	-0.430991	-0.731358	-1.83416	0.371567	0.540287	0.542045	0	0	0	0	0
0	0	0	0	0	0	0	0	0	0	0	0	0	0	0	0	3.99261	-0.844894	-1.02297	-1.79166	1.16613	0.684052	1.42592	-1.29557	-0.604213	-0.350171	1.93557	0.115688	-2.08392	0.132331	0.457742	0.738742	-0.869438	-1.3006	1.8076	0	0	0	0	0
0	0	0	0	0	0	0	0	0	0	0	0	0	0	0	0	0	4.33326	0.493858	0.960734	1.33248	1.51842	0.801928	1.4559	0.181512	-0.0599389	-1.32468	1.97095	1.08318	0.740365	0.734119	-0.98483	-0.0284121	-0.884312	-0.562272	0	0	0	0	0
0	0	0	0	0	0	0	0	0	0	0	0	0	0	0	0	0	0	-5.47198	-0.838178	-0.0544495	0.447764	-0.853746	-0.504865	-0.103859	-0.00727031	0.695006	1.13017	-0.46842	0.0588702	0.75657	0.233383	0.486845	-0.443704	-0.577382	0	0	0	0	0
0	0	0	0	0	0	0	0	0	0	0	0	0	0	0	0	0	0	0	-3.68603	0.687508	-0.193551	-1.07178	-0.559677	-0.675305	1.09756	-0.030739	-1.29477	-1.37685	1.18008	-0.0772	-0.665345	1.42207	-0.982633	-0.808279	0	0	0	0	0
0	0	0	0	0	0	0	0	0	0	0	0	0	0	0	0	0	0	0	0	-4.00034	0.113001	0.511142	-0.357401	0.609871	1.32957	-0.904912	0.12954	0.324235	0.252771	0.0189101	-1.22952	0.49362	0.290392	0.767355	0	0	0	0	0
0	0	0	0	0	0	0	0	0	0	0	0	0	0	0	0	0	0	0	0	0	-4.29146	-0.00648683	0.807059	-1.15055	-0.786768	0.991845	0.0950299	0.362343	-0.152373	0.573348	1.53491	0.281611	0.875512	-0.898471	0	0	0	0	0
0	0	0	0	0	0	0	0	0	0	0	0	0	0	0	0	0	0	0	0	0	0	-4.22921	0.297478	-1.32039	0.487928	0.64497	-0.5802	0.0550062	-2.28671	-1.27307	1.14991	-0.0238281	0.32306	0.134183	0	0	0	0	0
0	0	0	0	0	0	0	0	0	0	0	0	0	0	0	0	0	0	0	0	0	0	0	-3.08143	-1.65865	1.38122	-0.549468	0.361636	-0.337719	0.331895	0.538985	2.07976	-1.77227	0.933191	-0.988693	0	0	0	0	0
0	0	0	0	0	0	0	0	0	0	0	0	0	0	0	0	0	0	0	0	0	0	0	0	2.63215	0.54578	0.00600064	-0.859565	-0.62349	-0.935328	1.10003	-0.891294	-0.163602	-2.13974	0.899882	0	0	0	0	0
0	0	0	0	0	0	0	0	0	0	0	0	0	0	0	0	0	0	0	0	0	0	0	0	0	3.87855	0.800333	0.813853	-1.47783	-0.707623	-0.0167906	-1.0277	-0.909298	1.18226	1.60471	0	0	0	0	0
0	0	0	0	0	0	0	0	0	0	0	0	0	0	0	0	0	0	0	0	0	0	0	0	0	0	2.40017	-0.366444	-0.0139941	0.261826	0.777167	0.527846	0.83229	1.27499	-0.0553851	0	0	0	0	0
0	0	0	0	0	0	0	0	0	0	0	0	0	0	0	0	0	0	0	0	0	0	0	0	0	0	0	-2.47918	-0.0914443	0.155592	0.901381	1.39662	-0.255556	0.414057	-0.439265	0	0	0	0	0
0	0	0	0	0	0	0	0	0	0	0	0	0	0	0	0	0	0	0	0	0	0	0	0	0	0	0	0	-2.664	1.3681	-0.450381	1.05912	-0.990823	-0.44718	-1.06613	0	0	0	0	0
0	0	0	0	0	0	0	0	0	0	0	0	0	0	0	0	0	0	0	0	0	0	0	0	0	0	0	0	0	2.61076	-1.42534	1.20148	1.18797	-1.20172	0.915487	0	0	0	0	0
0	0	0	0	0	0	0	0	0	0	0	0	0	0	0	0	0	0	0	0	0	0	0	0	0	0	0	0	0	0	1.39448	0.152505	1.55661	1.01719	0.510308	0	0	0	0	0
0	0	0	0	0	0	0	0	0	0	0	0	0	0	0	0	0	0	0	0	0	0	0	0	0	0	0	0	0	0	0	2.30679	-1.51378	-1.46048	-1.81609	0	0	0	0	0
0	0	0	0	0	0	0	0	0	0	0	0	0	0	0	0	0	0	0	0	0	0	0	0	0	0	0	0	0	0	0	0	-2.51356	0.873865	0.403028	0	0	0	0	0
0	0	0	0	0	0	0	0	0	0	0	0	0	0	0	0	0	0	0	0	0	0	0	0	0	0	0	0	0	0	0	0	0	-0.69018	0.234941	0	0	0	0	0
0	0	0	0	0	0	0	0	0	0	0	0	0	0	0	0	0	0	0	0	0	0	0	0	0	0	0	0	0	0	0	0	0	0	-0.602527	0	0	0	0	0
0	0	0	0	0	0	0	0	0	0	0	0	0	0	0	0	0	0	0	0	0	0	0	0	0	0	0	0	0	0	0	0	0	0	0	0	0	0	0	0
-5.52669	-1.05846	-0.0178473	2.17552	-0.406049	-1.61224	0.370664	-0.49695	0.557683	1.10358	-1.35053	0.993588	-1.66248	0.0926898	0.762689	-0.553148	0.721344	1.36939	0.664267	-0.499753	-0.627867	-0.643146	-0.899798	-0.0131342	-1.26274	-0.0175737	2.96938	1.03877	0.782902	-0.790442	-0.252335	-1.82522	-0.851071	-0.404801	-2.20298	0.449021	0	0	0	0
0	-5.65637	-0.665669	0.800587	0.750648	-1.10427	0.0751668	-0.601481	0.180608	0.13504	-0.229283	-0.299075	0.511141	-1.5861	-0.665037	1.78219	1.12686	0.784308	0.404643	0.918143	-2.28994	-0.549613	0.958268	-1.14585	2.24108	0.211347	-0.208142	1.3408	0.833859	0.771114	-2.05088	0.903845	2.84495	2.27049	-0.430219	-1.59996	0	0	0	0
0	0	6.31285	-1.296	-0.783873	-0.542559	0.512572	1.52003	-0.413286	-0.864758	-0.233799	0.782308	-1.41292	0.00741831	-0.690592	2.29711	0.71992	0.525196	0.855753	-2.04453	-1.46057	2.27283	0.859843	-0.670906	0.43855	-0.721289	1.23534	-0.336332	-0.933225	1.26789	1.36231	1.82038	-0.373093	-0.276338	-0.615792	0.559778	0	0	0	0
0	0	0	5.54196	0.856594	0.599419	0.689606	0.13957	0.443465	-0.169525	0.34323	0.598889	0.86132	1.54895	-0.690939	0.718965	-1.24831	0.564862	-0.678025	0.562164	0.778717	-1.07236	0.906281	0.112985	1.10467	-0.233492	-0.649281	-0.123437	-1.44241	-0.907259	0.141216	-1.22388	-0.911034	0.997321	0.391829	-0.929217	0	0	0	0
0	0	0	0	-6.03471	0.916938	1.73555	1.346	0.0332505	0.874212	-0.238442	0.292803	0.201661	0.382855	0.967784	0.304113	0.345779	-0.733207	-1.07883	-0.112615	-0.257881	-0.0145625	-1.73341	-0.429531	0.377684	-0.169501	-1.39716	-0.130619	-0.561467	0.611149	-0.364849	-0.31382	-0.518795	-1.6878	-0.963103	1.4887	0	0	0	0
0	0	0	0	0	-5.24334	-1.60388	1.30283	1.71737	1.38632	0.240648	0.335073	-1.09201	1.98079	0.224589	0.554276	1.04815	1.10262	-0.162285	1.4551	-0.737123	0.410846	-0.0888912	-0.295061	0.859463	0.425626	1.48862	0.622603	0.100895	1.78151	-0.210292	-0.252694	-0.923391	-1.01538	1.51292	-0.133656	0	0	0	0
0	0	0	0	0	0	-5.45323	-0.753041	0.963408	-0.268039	1.28299	0.341416	-0.938037	0.104224	1.49139	0.0285029	-0.637949	0.622869	-0.135745	-0.183232	0.323305	-1.44351	0.0770184	0.511283	0.257186	-0.528438	0.209897	1.3074	-0.0882654	0.996222	-0.170585	-1.51922	-0.222522	0.111861	0.826159	1.18115	0	0	0	0
0	0	0	0	0	0	0	-6.30781	-0.948861	-1.3734	0.106601	0.0426348	-0.322571	-0.77197	0.176195	2.49765	-0.705925	-0.4364	0.977126	0.771979	-0.85448	-0.605963	-0.20365	0.340847	-0.186133	0.561821	-1.3032	-0.124131	-0.330046	-2.49421	0.905521	-1.08877	-1.46767	0.493162	-0.192416	-0.755001	0	0	0	0
0	0	0	0	0	0	0	0	-5.21188	-0.977648	1.42143	0.105193	-0.843363	0.781673	0.0431908	-3.04758	1.1205	-0.181998	-1.20701	-0.381048	0.260288	0.679408	1.03777	0.31427	-0.883879	-0.290191	-1.12062	0.431778	1.17146	0.929415	-0.176908	-0.287579	-1.56112	-0.0508402	1.32019	1.25517	0	0	0	0
0	0	0	0	0	0	0	0	0	-3.63041	0.166595	1.07558	1.34043	-0.784095	0.293122	-0.950977	1.18912	0.270764	0.108337	-0.518256	0.643724	-0.312138	-0.357255	-0.631023	0.484811	-0.958094	-2.36927	1.35296	0.915629	-0.753439	-0.143499	0.413755	0.0124264	0.0587915	-0.664968	-0.369517	0	0	0	0
0	0	0	0	0	0	0	0	0	0	-4.72041	0.448751	-0.135527	-0.487064	-2.04993	-0.363138	0.823	0.0104218	-1.12361	-0.720251	-1.09381	0.716471	-1.47041	0.1575	0.714552	-1.59292	-1.53458	0.176773	2.3245	-1.36015	-1.80649	0.776961	-2.19244	0.30888	-0.766533	-0.712083	0	0	0	0
0	0	0	0	0	0	0	0	0	0	0	4.58787	-0.21974	-0.45426	-0.470863	0.0155875	-0.839075	-1.65546	1.51214	-1.40647	1.82935	0.501	-0.683489	-0.580012	1.12364	0.61585	-1.08191	1.03966	0.702969	0.698934	0.258585	2.44778	1.36271	-1.72903	-0.353825	-0.397319	0	0	0	0
0	0	0	0	0	0	0	0	0	0	0	0	-4.44759	-1.63301	0.105131	-1.10151	-2.33241	-1.54938	1.79363	-0.449707	0.143508	2.21211	1.13291	1.07956	0.804276	0.375084	-0.90864	1.38804	0.322812	1.80475	-0.375919	-0.879621	-2.09277	0.627861	0.351181	0.116873	0	0	0	0
0	0	0	0	0	0	0	0	0	0	0	0	0	3.7883	-0.651911	-1.82596	0.725736	1.56018	2.05819	1.58054	-1.21853	-1.83336	0.131488	-1.13072	-0.381479	-0.168578	-0.544422	1.99064	0.911269	-0.420748	1.44001	-0.0895654	-0.812913	-0.328567	-0.855044	1.46839	0	0	0	0
0	0	0	0	0	0	0	0	0	0	0	0	0	0	4.86697	0.0306735	0.959813	1.52956	0.962258	-0.314831	-3.29986	0.104663	-0.639574	0.440808	-0.142887	-1.3444	1.34589	1.88388	-0.0174468	2.27227	1.83222	0.274354	1.83581	0.462032	1.02886	0.760922	0	0	0	0
0	0	0	0	0	0	0	0	0	0	0	0	0	0	0	-4.66148	2.3777	2.21736	1.57587	0.463715	-1.45481	0.524554	0.165073	-0.242508	-0.375595	-0.0565204	0.479518	0.529872	0.50314	0.252875	1.6318	0.397136	-0.646237	0.585865	0.420716	0.869845	0	0	0	0
0	0	0	0	0	0	0	0	0	0	0	0	0	0	0	0	-5.14356	-0.48085	0.210708	-0.0479542	1.43698	0.00360547	1.74029	0.541188	-1.43222	1.17389	1.05034	0.650266	-0.423259	-0.274389	-1.66139	-0.437282	0.835334	0.699051	-0.905195	-0.284192	0	0	0	0
0	0	0	0	0	0	0	0	0	0	0	0	0	0	0	0	0	5.45011	-0.0978027	0.375654	0.407041	1.22919	-1.73922	3.79672	-0.358784	-0.27058	0.91833	0.927224	1.38956	-0.559209	1.1506	-1.09238	0.081637	0.408622	-0.376185	0.522746	0	0	0	0
0	0	0	0	0	0	0	0	0	0	0	0	0	0	0	0	0	0	4.24131	1.45901	-0.61644	-0.104066	0.615549	-0.26729	-0.310165	-1.71659	-0.107626	1.00544	1.53315	1.55989	1.17853	0.522969	-2.40847	-1.20776	-0.482396	-0.838567	0	0	0	0
0	0	0	0	0	0	0	0	0	0	0	0	0	0	0	0	0	0	0	-4.37226	-0.747482	0.214734	0.78996	-1.53015	-0.363585	-2.02497	-1.5801	1.21831	-0.0354737	1.92707	-1.47949	0.152218	-2.19041	0.0524184	-0.20889	0.67428	0	0	0	0
0	0	0	0	0	0	0	0	0	0	0	0	0	0	0	0	0	0	0	0	4.17223	-0.490931	-0.780067	0.359056	0.550162	0.0524425	-0.309457	-1.48814	-0.794453	-0.252187	-1.41991	0.790227	0.107154	1.4493	-0.490563	1.00721	0	0	0	0
0	0	0	0	0	0	0	0	0	0	0	0	0	0	0	0	0	0	0	0	0	-3.60369	-1.67778	0.455927	-0.580155	-0.874543	0.353427	1.13368	1.68248	0.357981	-0.468461	0.443101	-0.0618761	-0.627883	0.612381	0.00861112	0	0	0	0
0	0	0	0	0	0	0	0	0	0	0	0	0	0	0	0	0	0	0	0	0	0	3.32122	2.73331	-0.510837	1.07049	0.351938	-0.539245	-2.65939	2.5688	-0.504282	0.558461	-0.58005	-0.232443	-0.585658	0.761462	0	0	0	0
0	0	0	0	0	0	0	0	0	0	0	0	0	0	0	0	0	0	0	0	0	0	0	-3.95898	0.880964	-0.256964	0.835712	1.23675	-0.0154281	-0.197654	-0.599364	0.63105	-0.325499	1.47925	0.319117	-0.615949	0	0	0	0
0	0	0	0	0	0	0	0	0	0	0	0	0	0	0	0	0	0	0	0	0	0	0	0	4.325	0.113233	1.84669	0.732391	0.170149	-1.55454	0.185293	1.02105	-0.326456	-1.81351	-2.2093	-0.2675	0	0	0	0
0	0	0	0	0	0	0	0	0	0	0	0	0	0	0	0	0	0	0	0	0	0	0	0	0	1.97344	-1.027	0.153555	1.84444	0.776278	0.425169	0.83711	-2.23385	-1.75324	0.685324	0.450736	0	0	0	0
0	0	0	0	0	0	0	0	0	0	0	0	0	0	0	0	0	0	0	0	0	0	0	0	0	0	-3.82366	0.744584	-0.166952	-0.481536	-1.24798	0.782505	-0.379895	-0.458446	-0.175984	-0.261562	0	0	0	0
0	0	0	0	0	0	0	0	0	0	0	0	0	0	0	0	0	0	0	0	0	0	0	0	0	0	0	2.88833	-0.387876	0.128718	-0.280451	-0.856882	0.11785	-0.794568	0.137722	-0.742735	0	0	0	0
0	0	0	0	0	0	0	0	0	0	0	0	0	0	0	0	0	0	0	0	0	0	0	0	0	0	0	0	2.69743	0.164582	1.33173	-1.00055	-1.36623	1.27566	0.239148	0.0710749	0	0	0	0
0	0	0	0	0	0	0	0	0	0	0	0	0	0	0	0	0	0	0	0	0	0	0	0	0	0	0	0	0	-2.69738	-0.841327	1.18567	1.26737	-0.0432306	0.318679	0.88041	0	0	0	0
0	0	0	0	0	0	0	0	0	0	0	0	0	0	0	0	0	0	0	0	0	0	0	0	0	0	0	0	0	0	-4.00586	0.0349898	0.360867	0.192208	-1.97175	0.694215	0	0	0	0
0	0	0	0	0	0	0	0	0	0	0	0	0	0	0	0	0	0	0	0	0	0	0	0	0	0	0	0	0	0	0	-2.65907	-0.0399779	-0.145899	0.156527	0.569748	0	0	0	0
0	0	0	0	0	0	0	0	0	0	0	0	0	0	0	0	0	0	0	0	0	0	0	0	0	0	0	0	0	0	0	0	-2.03301	-0.817581	1.1427	-1.13789	0	0	0	0
0	0	0	0	0	0	0	0	0	0	0	0	0	0	0	0	0	0	0	0	0	0	0	0	0	0	0	0	0	0	0	0	0	1.1298	0.13687	-1.46988	0	0	0	0
0	0	0	0	0	0	0	0	0	0	0	0	0	0	0	0	0	0	0	0	0	0	0	0	0	0	0	0	0	0	0	0	0	0	-1.20795	-0.159413	0	0	0	0
0	0	0	0	0	0	0	0	0	0	0	0	0	0	0	0	0	0	0	0	0	0	0	0	0	0	0	0	0	0	0	0	0	0	0	-0.484004	0	0	0	0
0	0	0	0	0	0	0	0	0	0	0	0	0	0	0	0	0	0	0	0	0	0	0	0	0	0	0	0	0	0	0	0	0	0	0	0	0	0	0	0
-5.79877	0.338477	-1.44723	-0.936756	1.52011	0.291409	-1.02522	1.43677	-1.22302	0.324593	0.13945	-1.59612	-0.333083	0.304826	0.635787	0.583067	1.25636	-0.900417	0.438487	0.0665392	0.548215	0.218477	-0.902258	0.331664	0.112438	0.478944	0.636247	-0.934952	1.5639	0.420982	2.06193	-1.43053	1.25876	-0.563666	0.580105	0.517967	0.266848	0	0	0
0	-5.83056	-0.968678	-0.0813791	0.876306	0.657449	0.638214	-1.23918	0.488822	1.18666	-0.13025	0.11194	-1.4834	0.433829	1.61785	2.13767	1.44388	-0.843592	-0.184407	0.334187	-0.830083	-0.0612699	0.0406518	1.49645	-0.212605	1.15932	0.547007	1.32072	0.907285	-0.777071	0.30589	0.656359	0.654309	-0.562808	0.154882	0.629717	-0.374417	0	0	0
0	0	6.68633	-0.302664	0.309617	-1.54798	-1.15912	-0.521762	0.278911	0.336349	0.998131	0.682919	-0.981902	0.597209	0.688922	1.15969	0.601639	-1.90665	-0.0542334	0.867124	-1.50575	-0.0674837	-1.42021	0.00218445	0.18002	-0.0750649	0.156612	0.61489	0.0853476	-2.05063	-2.17103	-0.0332002	1.69829	-0.300714	-0.884921	0.980205	-2.01782	0	0	0
0	0	0	-5.79794	1.41942	1.10659	-1.07211	-1.1487	-1.3735	-0.383471	-0.383002	-0.0860579	-1.85385	-0.764239	1.21439	-0.6419	-0.0576997	0.364859	1.09412	-0.329634	2.1925	-0.934694	1.04559	-0.365127	-0.650083	-0.758614	-0.942868	0.598138	-0.707393	-2.1758	-0.463221	0.105979	0.35578	-1.40677	0.702237	0.820885	-0.436249	0	0	0
0	0	0	0	6.28582	0.34734	-1.57823	-0.877183	0.127941	-0.214579	0.104946	-0.0289636	0.767121	0.594487	0.735155	-0.779554	0.868716	-0.204749	0.292498	0.796026	-1.01981	-0.452933	0.485062	-0.159587	0.280377	-0.281498	1.78102	-0.513798	-1.59003	0.395259	0.137488	-0.12001	-0.209285	1.93726	-0.724064	0.262087	1.7496	0	0	0
0	0	0	0	0	-7.51612	1.10418	1.49801	0.196949	-0.491128	2.56338	-1.08163	0.127486	0.565777	0.468254	0.713223	0.642394	1.09316	-0.118925	-0.856481	1.01252	-0.142528	-1.84728	0.531404	-0.529339	-0.792631	-0.451119	0.303045	-0.287796	0.954827	0.131083	0.782879	1.37682	1.78826	-0.790689	0.0925158	1.77146	0	0	0
0	0	0	0	0	0	-5.13173	-0.842039	-0.766498	1.37913	-0.463627	-0.616031	0.106144	0.345211	0.189896	0.730956	-1.43386	-0.319093	-0.732715	0.432904	-2.4796	1.15341	0.287308	1.15616	0.126728	-0.487807	-0.463951	0.398902	-1.72412	0.266972	0.153923	0.450372	2.58798	0.454406	-0.523724	1.21646	0.674714	0	0	0
0	0	0	0	0	0	0	6.22996	-0.399605	-0.815206	-1.06468	-0.194912	0.0455986	1.30408	-0.232436	1.13759	0.18137	-0.644985	-1.7968	0.503712	0.204251	-0.456142	0.717574	0.516183	0.486474	-0.418967	0.433717	-0.561542	0.672439	0.46933	-0.170945	0.536491	1.28581	-0.0831781	0.330303	0.412106	1.13684	0	0	0
0	0	0	0	0	0	0	0	-7.18929	0.268194	0.39775	-0.000196214	-1.48306	-2.45766	1.03659	0.21736	-1.82145	-0.276296	1.35199	-0.304844	0.165202	0.712659	-0.377197	-0.0904094	-0.0230736	-0.962575	-2.33871	-3.32602	0.379839	-0.655052	0.588632	1.32107	-0.344406	-0.596332	-0.729669	0.111552	-0.539631	0	0	0
0	0	0	0	0	0	0	0	0	6.11585	-1.47523	2.49699	0.4801	-0.219635	-0.335702	-0.731485	-0.626957	-0.0274185	1.03027	-1.57268	0.0033452	2.23311	-0.12982	0.939092	0.559454	0.999849	-1.12017	-1.50198	0.0864638	1.32453	-0.240609	1.26143	-0.864157	1.44863	0.630581	-1.41225	0.0496859	0	0	0
0	0	0	0	0	0	0	0	0	0	-4.96766	-0.448402	0.0446503	0.524322	-2.91205	-0.224483	1.40262	-0.561314	-0.0705126	0.700215	-0.801061	0.324315	-0.792299	0.216967	-0.545859	0.226288	0.182221	0.130404	1.52628	-0.787752	-1.28635	0.122139	0.731571	-0.152738	1.34729	-1.37491	0.131874	0	0	0
0	0	0	0	0	0	0	0	0	0	0	5.38698	-0.961781	-0.161173	1.95656	0.131071	0.183654	-0.603116	0.248712	-0.892778	-1.38995	-0.0848343	0.0675994	0.54436	-0.29013	0.714803	0.752947	1.65047	-0.299163	0.365392	1.12691	-2.26069	-0.319515	0.575187	0.604778	-1.67942	1.65485	0	0	0
0	0	0	0	0	0	0	0	0	0	0	0	-4.31492	-0.0196442	1.18695	-2.08726	1.50309	1.30433	-0.146057	0.630582	-0.571689	-1.88703	-0.181463	-0.0969598	0.70474	0.419766	-1.0383	-0.172163	0.951069	1.18351	-1.26268	-0.849262	-0.576927	0.241008	0.148199	0.27692	-1.85784	0	0	0
0	0	0	0	0	0	0	0	0	0	0	0	0	-3.84915	0.407379	0.909611	0.2344	-1.97063	-0.13272	-1.04284	-0.376925	-1.22775	1.22482	-0.238615	-0.224017	-1.68518	-1.16449	2.41551	-0.746978	0.988176	1.18256	1.42746	-0.0545893	1.5753	0.0763826	0.263316	-2.17217	0	0	0
0	0	0	0	0	0	0	0	0	0	0	0	0	0	-4.1579	-1.2775	1.38276	0.121322	-0.555794	0.0884063	-0.753133	0.816358	-1.99546	1.04795	-1.09015	-1.19434	0.703747	0.548739	-1.35423	-0.140355	-1.97176	0.0637223	0.0338512	1.23307	0.321371	0.723879	0.886584	0	0	0
0	0	0	0	0	0	0	0	0	0	0	0	0	0	0	-4.97006	-1.03022	-0.735423	1.61411	0.433792	-0.584596	-0.692871	-0.0321921	-0.365978	0.146109	-0.324223	-1.52166	-0.275541	1.67478	-0.0545046	-0.779386	1.66295	-1.67065	-0.543814	-0.468	1.18406	0.0917015	0	0	0
0	0	0	0	0	0	0	0	0	0	0	0	0	0	0	0	-4.09152	0.516965	-0.717721	1.37747	-0.783806	-1.56797	-1.34424	1.12482	0.61915	0.0714132	-1.26662	-0.471473	-0.800913	0.4784	0.960236	0.794002	-1.20129	0.754274	0.889346	0.349032	0.949597	0	0	0
0	0	0	0	0	0	0	0	0	0	0	0	0	0	0	0	0	-3.64957	1.28026	0.415037	-0.947253	-0.986911	0.57954	-0.039405	0.599266	-0.455248	0.148483	-0.721513	0.553245	-0.0371596	-1.01897	-0.54167	-0.326752	0.409016	-0.567545	0.195518	-1.36289	0	0	0
0	0	0	0	0	0	0	0	0	0	0	0	0	0	0	0	0	0	5.94014	-0.179323	0.122944	1.14973	-1.77608	0.549755	0.854166	1.34411	-1.35186	-0.472027	1.98037	-1.07943	0.402811	1.00835	-0.235776	-0.373501	-1.47102	0.429383	1.23856	0	0	0
0	0	0	0	0	0	0	0	0	0	0	0	0	0	0	0	0	0	0	-3.49755	0.264042	0.428668	-1.41993	1.82927	-0.0441627	0.125519	0.110547	-0.355104	-1.80902	-0.0209453	-0.780526	0.715908	0.205097	1.61641	-0.7175	-0.952867	-0.836766	0	0	0
0	0	0	0	0	0	0	0	0	0	0	0	0	0	0	0	0	0	0	0	-4.4284	0.421771	-1.24239	-1.12394	0.465554	-0.902301	0.151524	0.288944	0.116183	0.183737	1.02773	0.41451	0.149528	0.413472	0.073678	1.60395	-0.528148	0	0	0
0	0	0	0	0	0	0	0	0	0	0	0	0	0	0	0	0	0	0	0	0	-3.68879	-0.124814	0.919684	1.11245	1.52463	-0.388306	-1.27244	-0.891856	-0.429618	0.0184053	0.87141	0.715145	-1.8566	0.341352	0.948466	-1.76028	0	0	0
0	0	0	0	0	0	0	0	0	0	0	0	0	0	0	0	0	0	0	0	0	0	-5.05011	-0.309697	1.33743	0.764152	0.159347	0.853726	-1.12287	1.82603	1.04194	1.03292	-0.898909	-1.73926	1.01565	-0.147026	0.616671	0	0	0
0	0	0	0	0	0	0	0	0	0	0	0	0	0	0	0	0	0	0	0	0	0	0	-3.60681	0.589186	-0.168261	0.848358	0.280629	-1.28463	-0.225511	-0.0642669	-0.0386827	-0.886543	-0.521793	0.00939065	0.93343	-0.357797	0	0	0
0	0	0	0	0	0	0	0	0	0	0	0	0	0	0	0	0	0	0	0	0	0	0	0	3.84221	-0.0690211	0.254096	-1.1892	-1.19007	-0.864536	0.204871	-1.60484	-0.0102871	0.394976	-0.0734579	-0.244555	0.720545	0	0	0
0	0	0	0	0	0	0	0	0	0	0	0	0	0	0	0	0	0	0	0	0	0	0	0	0	-2.43916	-0.374274	1.21419	1.47997	-1.56152	-0.171324	-0.756769	1.56926	-0.058801	0.245106	-0.484947	-1.92057	0	0	0
0	0	0	0	0	0	0	0	0	0	0	0	0	0	0	0	0	0	0	0	0	0	0	0	0	0	-3.553	-0.221303	-0.184544	0.906212	0.292397	-1.01028	-0.489996	0.211125	-1.64276	0.927932	1.35932	0	0	0
0	0	0	0	0	0	0	0	0	0	0	0	0	0	0	0	0	0	0	0	0	0	0	0	0	0	0	-3.2922	1.0343	-0.705449	1.13106	-0.326082	-1.4047	0.230581	-1.79356	-0.586149	0.195336	0	0	0
0	0	0	0	0	0	0	0	0	0	0	0	0	0	0	0	0	0	0	0	0	0	0	0	0	0	0	0	2.1153	-0.681167	-0.0362144	-0.587262	0.286628	0.740596	-0.549803	-0.241422	-0.808158	0	0	0
0	0	0	0	0	0	0	0	0	0	0	0	0	0	0	0	0	0	0	0	0	0	0	0	0	0	0	0	0	2.28799	-0.859157	-1.52969	0.256414	-0.267947	-1.08852	-1.90209	-0.332591	0	0	0
0	0	0	0	0	0	0	0	0	0	0	0	0	0	0	0	0	0	0	0	0	0	0	0	0	0	0	0	0	0	-2.41611	1.02392	-1.05685	-1.49975	-0.571361	0.275764	-0.618038	0	0	0
0	0	0	0	0	0	0	0	0	0	0	0	0	0	0	0	0	0	0	0	0	0	0	0	0	0	0	0	0	0	0	-1.188	2.07192	0.190111	-0.593705	-1.47519	0.963175	0	0	0
0	0	0	0	0	0	0	0	0	0	0	0	0	0	0	0	0	0	0	0	0	0	0	0	0	0	0	0	0	0	0	0	2.47095	0.0966219	0.0970831	0.358187	-0.0353488	0	0	0
0	0	0	0	0	0	0	0	0	0	0	0	0	0	0	0	0	0	0	0	0	0	0	0	0	0	0	0	0	0	0	0	0	-2.44629	-0.00394758	0.139829	-1.03083	0	0	0
0	0	0	0	0	0	0	0	0	0	0	0	0	0	0	0	0	0	0	0	0	0	0	0	0	0	0	0	0	0	0	0	0	0	-1.48177	0.0927045	-1.45716	0	0	0
0	0	0	0	0	0	0	0	0	0	0	0	0	0	0	0	0	0	0	0	0	0	0	0	0	0	0	0	0	0	0	0	0	0	0	-1.76317	0.64798	0	0	0
0	0	0	0	0	0	0	0	0	0	0	0	0	0	0	0	0	0	0	0	0	0	0	0	0	0	0	0	0	0	0	0	0	0	0	0	-0.85311	0	0	0
0	0	0	0	0	0	0	0	0	0	0	0	0	0	0	0	0	0	0	0	0	0	0	0	0	0	0	0	0	0	0	0	0	0	0	0	0	0	0	0
-5.10699	0.549276	-1.08306	0.835391	0.218662	1.8614	1.33411	0.0968397	0.643139	-0.580373	0.387656	-1.74877	-0.766617	-0.909109	0.0499663	0.46569	-0.795273	-0.122826	-1.30628	-1.44158	0.711576	-0.202438	-0.306366	-0.145916	-0.460896	1.68419	0.6968	0.109874	-1.66231	0.603844	-1.13721	1.4551	0.0306051	1.08828	-0.80758	-0.536647	0.450951	-0.397522	0	0
0	7.16906	-0.507836	-0.900457	0.734866	-0.713514	-1.00402	1.18835	0.590703	-1.16428	-0.801325	-0.26822	-0.633023	0.380415	-0.720172	0.701594	0.345462	0.56443	0.0804786	-0.714396	0.241853	-0.594135	-0.754014	0.755465	-0.101888	-0.973947	0.504416	1.02111	-0.0829405	-0.271093	-0.557999	-1.62124	1.18328	-1.16015	1.31715	-0.758622	1.0613	0.213588	0	0
0	0	5.69171	-0.185439	0.471284	-0.258792	0.11036	-0.984714	1.71329	-0.952012	-1.39833	0.539935	-0.211522	0.618819	-0.349196	0.638541	0.964939	0.280664	-0.966622	-0.472058	-0.155694	2.15271	-0.300593	-0.369748	-1.46302	0.254195	0.93592	0.57486	0.431602	1.94188	0.0313687	-0.0215291	-0.732895	-0.130943	1.84766	0.513934	0.474126	-0.733543	0	0
0	0	0	-6.89269	0.621558	0.483744	-0.47592	-0.344748	0.361329	-0.217659	-0.037616	-0.41917	-1.35507	-0.696737	0.670775	0.890744	0.607657	0.25668	-0.169455	-0.145529	-0.678097	-1.35656	-0.975877	-0.61832	-1.16736	-1.93608	0.569997	1.73991	1.47308	-1.95199	1.08879	0.110041	1.44907	-0.0973147	-1.47341	-0.350997	-0.941161	-1.15502	0	0
0	0	0	0	-4.7228	-0.813127	-0.7223	1.31622	-1.73215	0.631493	0.725226	-1.58444	0.0198399	-2.2228	0.748216	1.45055	-1.29144	0.0892356	-1.26658	1.01383	0.388003	-0.944566	0.933312	1.09148	0.8269	-1.20323	0.532057	-0.627309	-0.0529233	-0.100481	0.787577	-0.469493	-0.0516342	-1.72915	0.097755	0.111737	0.771963	-0.387568	0	0
0	0	0	0	0	6.57323	-0.662928	-1.25909	0.752105	0.0874329	0.635095	-1.18078	1.25401	-0.320469	2.49458	-1.40161	-0.601679	0.111914	-2.01024	-0.263919	-1.73522	-0.9211	0.228848	-0.15906	0.148057	-0.109999	-1.81171	-0.468523	0.323459	-0.0538003	-2.1519	-2.09214	2.17685	1.33278	0.932701	1.1022	-1.54213	1.30781	0	0
0	0	0	0	0	0	-5.17308	0.265123	2.4178	0.673957	-0.0392741	-0.522752	0.585067	-1.68333	-0.619814	-1.18866	-2.50552	1.47954	-0.0681055	0.428788	-1.11206	0.434601	-0.440016	-1.04932	-1.37768	-0.895555	-1.38568	-1.11609	1.35445	1.49777	-1.51594	0.525847	0.300929	-0.524219	0.705844	-2.04534	0.252366	2.36599	0	0
0	0	0	0	0	0	0	-5.42656	1.32414	-0.195717	0.122721	0.662293	-0.0247592	0.0673922	-1.05902	-2.90717	0.301251	0.476758	-0.539876	0.371749	-2.42575	0.169856	0.414312	0.0331916	0.564447	-2.24817	-0.605922	0.913009	-0.666404	-0.499606	-0.598807	0.209759	0.372346	-0.551194	1.21039	-0.0124369	0.379139	-0.720077	0	0
0	0	0	0	0	0	0	0	-6.10005	0.104651	-1.14688	1.78816	-0.603404	0.937029	-0.346649	-0.942204	0.0101112	1.17183	-0.360609	-0.728084	0.931162	-1.41967	-0.0573779	-1.07461	1.56534	1.30307	1.25245	-0.609157	-0.0534925	1.79618	-0.40258	1.25079	-0.386484	-0.114185	0.36286	-0.995776	2.27485	-0.216141	0	0
0	0	0	0	0	0	0	0	0	5.35499	1.44346	1.355	2.03847	-0.758342	1.3246	0.00137203	0.109518	-1.42813	-0.394037	-0.67065	-0.936967	-1.47409	-0.819683	-1.09857	0.117186	-0.631398	0.35636	-0.639729	-1.02203	-0.396335	0.205526	0.0445436	0.194233	-1.66415	-0.25126	0.401957	-0.78001	-0.698107	0	0
0	0	0	0	0	0	0	0	0	0	-5.75771	1.05711	1.17685	-2.58505	-1.89079	-0.682532	-0.715647	-0.0632439	1.8511	0.345743	0.707803	1.13495	-0.111128	-0.481715	1.29449	0.304584	0.167271	-0.708733	-0.502021	0.448072	0.144714	0.269161	-0.0364563	-1.56884	0.746018	0.400582	-2.30177	-0.0890411	0	0
0	0	0	0	0	0	0	0	0	0	0	5.74598	-1.03953	1.12464	-0.465675	-0.264974	-0.524552	-0.458719	-1.37709	-0.408771	0.0564605	0.347818	-0.0519728	-0.314944	1.23556	-1.5044	-0.693337	0.556757	-0.934739	-1.08331	-0.749754	0.551313	1.47262	-1.26542	0.502691	-1.02079	-0.806046	0.0391711	0	0
0	0	0	0	0	0	0	0	0	0	0	0	-4.36477	0.123758	0.612604	-0.270182	-0.703726	-2.14391	0.709999	1.60668	0.609684	-0.437409	1.33103	-0.101093	-0.10239	1.56041	-0.392511	1.08659	1.42441	-0.955166	0.330685	-1.31049	0.756505	0.323257	0.539471	0.201027	-0.71653	0.127292	0	0
0	0	0	0	0	0	0	0	0	0	0	0	0	6.20316	0.193554	1.58241	-1.4763	1.20122	-0.223863	0.978623	0.0825332	0.477976	0.760299	-0.794184	2.24655	1.28403	-1.40461	-0.634359	-1.10027	1.12525	-2.06961	-1.81786	0.934528	0.596662	0.45699	-0.699813	-0.494167	-1.35704	0	0
0	0	0	0	0	0	0	0	0	0	0	0	0	0	-4.09857	-2.40838	-0.0908313	-0.0367435	2.02775	0.582758	-0.575173	0.544707	0.797757	0.208346	0.180982	-0.571313	-0.0206131	-1.1012	0.277986	1.33141	0.617943	0.235955	0.479314	-1.38207	1.10501	0.0534626	0.0244176	0.62922	0	0
0	0	0	0	0	0	0	0	0	0	0	0	0	0	0	-4.3801	0.266738	-1.15093	-0.36814	0.640403	-0.0595545	-0.261594	0.75456	1.14706	0.204106	-0.422935	0.422817	-0.805626	0.0798292	0.295278	-0.718341	-0.999656	-0.492528	0.966624	1.33992	1.13543	-0.638883	1.25532	0	0
0	0	0	0	0	0	0	0	0	0	0	0	0	0	0	0	4.34883	-1.44892	1.58991	0.516837	0.0692202	0.278836	-0.221868	-0.162446	-1.49279	-0.460754	0.221438	-0.474729	-0.0474471	-0.455437	-1.64473	-1.364	-0.10074	2.13267	-0.413562	-0.218203	-0.767336	-0.526676	0	0
0	0	0	0	0	0	0	0	0	0	0	0	0	0	0	0	0	5.58441	-1.30825	-0.995922	-0.33719	-0.460081	0.563403	0.551918	0.846111	0.406191	0.332961	0.338543	-0.96749	-0.680412	-0.65315	0.5858	0.462357	-0.79304	2.03055	-0.255635	-0.662211	1.74811	0	0
0	0	0	0	0	0	0	0	0	0	0	0	0	0	0	0	0	0	5.49412	0.692859	0.932619	-0.663107	0.265067	1.13973	-0.151754	0.0777989	0.0333323	-0.643406	-0.0705167	1.21599	1.32634	0.284529	0.115803	-1.12073	1.79502	0.00404649	-0.400559	-0.780343	0	0
0	0	0	0	0	0	0	0	0	0	0	0	0	0	0	0	0	0	0	4.59966	-0.348182	-0.540865	-0.378725	-0.932318	1.23986	-0.0652235	0.742765	-1.15266	-0.811513	1.14754	-0.175263	0.648839	1.46224	0.250466	-0.162617	0.0702541	-0.836249	-0.295751	0	0
0	0	0	0	0	0	0	0	0	0	0	0	0	0	0	0	0	0	0	0	-4.8326	2.47112	0.119217	-0.322349	0.0221995	-1.17966	-1.0802	0.320953	1.92352	1.23277	0.621617	0.0843935	0.239129	0.970489	1.08183	-0.0861996	0.0647845	-0.548881	0	0
0	0	0	0	0	0	0	0	0	0	0	0	0	0	0	0	0	0	0	0	0	-4.41793	-1.48326	0.101699	-0.533034	0.421607	0.417991	0.500188	0.256964	0.660138	-0.162191	1.58241	1.64715	0.372171	-1.04137	1.64706	-0.817979	0.0141342	0	0
0	0	0	0	0	0	0	0	0	0	0	0	0	0	0	0	0	0	0	0	0	0	3.27361	0.830083	-1.13909	1.4902	-0.36253	1.0236	-1.24226	-0.471009	-1.12329	0.476652	-0.217171	0.379931	-1.68081	0.759081	0.880231	-0.550039	0	0
0	0	0	0	0	0	0	0	0	0	0	0	0	0	0	0	0	0	0	0	0	0	0	-3.50633	-0.973388	-0.17203	-0.588596	-1.4694	0.691968	1.51876	-0.678717	1.54446	0.29603	0.504477	0.861528	0.162977	-0.618857	-0.0604067	0	0
0	0	0	0	0	0	0	0	0	0	0	0	0	0	0	0	0	0	0	0	0	0	0	0	3.29958	-0.742653	-0.0962113	0.0105509	-0.306562	-0.325891	1.07503	0.363021	-0.972146	0.708329	-1.18757	-0.0758677	0.663503	-1.80318	0	0
0	0	0	0	0	0	0	0	0	0	0	0	0	0	0	0	0	0	0	0	0	0	0	0	0	-2.73146	-0.583189	-0.318865	-1.04362	-0.077238	-1.37919	0.738566	0.777072	-1.02189	0.578538	1.99549	0.580579	0.41047	0	0
0	0	0	0	0	0	0	0	0	0	0	0	0	0	0	0	0	0	0	0	0	0	0	0	0	0	2.51912	-0.209549	-0.572047	0.628429	0.62612	0.816271	0.44238	-1.24292	-0.527643	-0.541355	-0.0846084	0.00801822	0	0
0	0	0	0	0	0	0	0	0	0	0	0	0	0	0	0	0	0	0	0	0	0	0	0	0	0	0	-3.43996	0.0975943	-0.94238	2.13141	-0.352807	0.879523	-0.943879	0.285976	0.311065	0.73905	0.992519	0	0
0	0	0	0	0	0	0	0	0	0	0	0	0	0	0	0	0	0	0	0	0	0	0	0	0	0	0	0	-3.1304	-0.657346	1.67605	0.532974	2.04119	0.436905	1.68219	-0.0101796	-0.693752	0.933913	0	0
0	0	0	0	0	0	0	0	0	0	0	0	0	0	0	0	0	0	0	0	0	0	0	0	0	0	0	0	0	-2.71479	0.324111	0.627494	0.00621505	0.30812	-1.03722	-0.368518	0.965252	-0.127012	0	0
0	0	0	0	0	0	0	0	0	0	0	0	0	0	0	0	0	0	0	0	0	0	0	0	0	0	0	0	0	0	2.90585	-0.569953	0.509437	-1.63835	-1.79562	0.221555	0.46709	0.152976	0	0
0	0	0	0	0	0	0	0	0	0	0	0	0	0	0	0	0	0	0	0	0	0	0	0	0	0	0	0	0	0	0	-1.99321	0.727704	1.54943	-0.96951	0.788979	-0.119723	-0.325035	0	0
0	0	0	0	0	0	0	0	0	0	0	0	0	0	0	0	0	0	0	0	0	0	0	0	0	0	0	0	0	0	0	0	-2.92381	-0.264131	-0.665695	-0.422649	0.114298	-2.04264	0	0
0	0	0	0	0	0	0	0	0	0	0	0	0	0	0	0	0	0	0	0	0	0	0	0	0	0	0	0	0	0	0	0	0	1.44772	1.70399	-0.059065	0.0764826	0.358703	0	0
0	0	0	0	0	0	0	0	0	0	0	0	0	0	0	0	0	0	0	0	0	0	0	0	0	0	0	0	0	0	0	0	0	0	3.22956	-0.067792	-0.875742	0.574404	0	0
0	0	0	0	0	0	0	0	0	0	0	0	0	0	0	0	0	0	0	0	0	0	0	0	0	0	0	0	0	0	0	0	0	0	0	-1.29154	2.66938	-0.658802	0	0
0	0	0	0	0	0	0	0	0	0	0	0	0	0	0	0	0	0	0	0	0	0	0	0	0	0	0	0	0	0	0	0	0	0	0	0	-0.487746	-0.864716	0	0
0	0	0	0	0	0	0	0	0	0	0	0	0	0	0	0	0	0	0	0	0	0	0	0	0	0	0	0	0	0	0	0	0	0	0	0	0	1.50067	0	0
0	0	0	0	0	0	0	0	0	0	0	0	0	0	0	0	0	0	0	0	0	0	0	0	0	0	0	0	0	0	0	0	0	0	0	0	0	0	0	0
6.30464	1.95623	-0.39785	0.132199	1.79313	-0.448183	-0.164703	-0.11247	-0.999726	1.15234	-0.0131776	-0.595216	1.02964	-0.0824482	0.0296201	-1.12026	-0.462716	-0.701044	2.55354	0.300725	-1.74763	0.201911	0.37499	0.791577	-0.649652	-0.182307	1.52529	0.278015	-1.13528	-0.0475395	-1.47335	-0.518137	-1.63827	-0.852266	0.708361	1.86221	0.823612	-1.31706	0.632767	0
0	6.5067	0.262845	0.594224	0.292548	-0.798438	-0.597232	-0.351966	-0.967371	0.761028	0.511138	-1.09875	-2.11879	-0.0768694	1.13507	0.273632	0.133222	-0.918695	-0.605929	1.04189	-1.01188	-1.43636	-1.07631	-0.586519	0.725112	-0.830546	-0.822889	0.148388	-0.414768	-0.198643	0.869632	0.126518	0.812487	0.173197	-0.0812283	1.23813	0.566981	-0.666034	-2.03776	0
0	0	6.28658	-1.03523	-0.9648	0.297799	0.100691	-1.34793	0.696014	1.48831	0.907737	3.31773	-1.26984	-3.01501	-1.77244	0.674473	0.477851	-2.62157	1.09556	-1.43047	-0.00111969	-0.701804	-0.355542	-0.886662	-0.13177	0.411507	-1.02179	0.0716467	0.353481	-0.340306	-0.465387	-0.0943616	1.19251	-0.750091	1.70941	0.0463304	1.04106	1.75266	1.06837	0
0	0	0	-5.428	0.773812	-1.2032	-0.25033	-0.558257	-0.377153	0.811265	-0.276449	0.709071	-0.36878	-0.436998	0.717676	-1.55107	1.60888	-0.917706	-0.379843	2.02861	1.96854	-0.480856	-0.527757	-0.565197	0.423372	-0.943111	1.11405	1.78523	-0.526847	1.49932	1.24697	-0.248325	0.77424	-1.72877	0.724423	0.833902	0.463251	1.27167	0.0551003	0
0	0	0	0	-5.29635	-0.78181	1.06216	-0.643256	0.525201	-1.33051	-0.573617	0.195636	1.62642	-0.398417	0.702797	1.43684	-0.735698	0.46113	-0.220217	0.387799	0.11784	-0.374429	0.165351	2.13519	-1.40031	-0.453186	1.71068	-0.879902	0.213855	0.224898	1.12339	1.68815	0.0647328	-1.00933	0.53513	1.28834	0.852507	1.33046	1.40304	0
0	0	0	0	0	-5.78359	-0.408732	0.140878	1.14214	-1.48216	-0.567203	0.253456	0.342489	0.0387896	0.676727	0.936051	0.374717	1.52409	0.77586	-0.107818	0.714806	-1.045	-0.64241	0.365997	-1.21101	0.767764	-0.822089	1.03575	0.0910111	-0.571904	-0.235143	2.21372	0.601729	-0.0368979	0.204108	-0.712444	0.67251	-1.01352	-1.31431	0
0	0	0	0	0	0	-6.13089	-0.0118488	0.880904	-0.335295	0.481179	-0.855933	1.45374	-1.79934	0.943286	-0.413068	0.209406	-1.12867	1.45509	-0.684527	1.0896	-1.2147	0.572588	1.54687	0.416754	2.56342	0.277298	-0.316879	-0.36006	1.21293	1.27366	0.298364	0.693419	0.859322	-1.04799	0.690449	0.056031	-0.371755	0.211984	0
0	0	0	0	0	0	0	-5.81981	0.290762	0.527284	-0.945338	-0.28013	0.361482	1.74966	0.547567	0.831958	-0.36594	-0.765415	1.29431	-0.240992	0.154652	0.885871	-0.734084	-0.923013	0.964459	0.736014	-0.452626	1.23141	-1.75919	1.2138	0.444545	0.114636	1.7023	-0.0913942	-1.04595	-0.564113	0.602767	1.05598	-1.80058	0
0	0	0	0	0	0	0	0	-6.11759	-0.389172	0.189533	0.848884	-0.52179	-0.173629	0.227164	-0.471313	0.629944	-1.16973	0.39133	-0.266216	-2.74539	-0.140956	1.21701	-0.67709	-0.531982	-1.04913	-0.056199	-0.563691	1.17478	0.09759	-0.152731	0.825376	0.842605	-0.926083	0.885738	-0.738917	1.55548	-1.70169	0.860108	0
0	0	0	0	0	0	0	0	0	4.87733	-0.738429	0.680655	2.05126	0.659965	-1.35679	0.0434158	-0.200737	0.0238628	-0.187403	-0.413264	-0.041323	-0.417419	1.18908	-0.440102	-0.256778	-1.85692	1.22905	-0.96668	-0.175543	0.840801	-1.02029	-1.7615	1.08988	2.01212	0.265343	0.0358823	-0.00130577	-0.0327348	0.958369	0
0	0	0	0	0	0	0	0	0	0	-4.39943	-2.08903	0.500758	-1.59913	0.883041	-0.389534	2.54875	0.782901	1.80913	0.819131	0.940459	1.55258	-0.86272	-0.121787	-0.156552	-0.331236	-1.12823	1.9832	-2.06687	-0.0639806	-1.60693	-0.0234703	-0.469667	0.70861	1.06807	0.396142	0.921416	1.02239	0.361761	0
0	0	0	0	0	0	0	0	0	0	0	4.95489	0.0484455	-0.268009	-0.22045	0.270309	-0.21198	0.460802	1.10821	0.0766276	0.665267	1.11068	-1.34809	-0.388875	1.01657	1.15261	1.19523	-0.447746	-1.11371	0.485739	0.848342	-0.382126	-0.175527	-0.136605	0.266551	0.159934	-0.460563	0.873105	-0.214377	0
0	0	0	0	0	0	0	0	0	0	0	0	-4.81474	0.614992	0.700589	-0.352718	1.15469	0.844355	-0.882511	0.340757	-1.15763	-0.297963	-1.43631	-2.97766	-1.14343	-0.399972	-0.43339	0.223411	0.312705	-0.852831	0.47995	-0.375368	2.42096	1.07882	-1.35835	0.468637	0.620092	-0.177224	-0.0865782	0
0	0	0	0	0	0	0	0	0	0	0	0	0	-4.51334	0.737146	-1.866	-0.0235269	-0.252018	1.3986	-1.16595	-0.207739	-0.868243	0.262794	0.338027	-0.249596	0.126984	0.664278	-0.000989599	0.92896	-0.411814	2.0222	0.255703	-1.1176	0.66746	2.25741	-2.21349	1.25144	0.061875	-0.990505	0
0	0	0	0	0	0	0	0	0	0	0	0	0	0	5.7801	0.873363	1.75362	-0.128331	1.55112	-1.38776	-1.07415	0.375986	0.437078	0.23838	-0.731078	-0.201508	1.09297	0.21931	0.538456	-1.38618	2.44792	0.582869	-1.10954	0.19216	-1.43457	-1.13948	0.501664	1.02309	-0.464662	0
0	0	0	0	0	0	0	0	0	0	0	0	0	0	0	5.07517	0.851351	1.34363	0.586429	0.976323	1.68071	0.203985	-0.729842	-1.16705	-0.1717	0.375063	0.0645385	-1.21215	-0.810344	-0.760792	1.72969	-0.912931	0.309548	0.610196	-1.91005	0.810297	-0.39881	0.794469	-0.306946	0
0	0	0	0	0	0	0	0	0	0	0	0	0	0	0	0	4.91221	1.21925	1.03709	-0.699799	-1.0049	0.709044	0.362338	-0.471154	-1.77242	0.648148	0.250038	0.13276	0.376908	-0.56472	0.524476	1.94863	0.614694	-0.740197	-0.39654	-0.987787	-0.650514	0.36692	1.1697	0
0	0	0	0	0	0	0	0	0	0	0	0	0	0	0	0	0	-4.14451	0.0247378	-1.15289	0.786367	0.123705	0.542478	1.3126	-0.307579	-0.228794	0.345267	-3.32899	-1.75398	-0.737103	0.85483	-0.546084	-0.734637	-1.6289	-0.111505	0.733211	-0.249127	0.920672	0.0731664	0
0	0	0	0	0	0	0	0	0	0	0	0	0	0	0	0	0	0	4.9316	0.652633	0.980963	0.179446	0.863604	1.68526	1.40111	-0.654039	1.36121	0.416226	1.89397	-0.604667	-0.201973	-0.847998	0.495268	1.00522	1.30813	0.706012	0.234983	0.954641	-1.50086	0
0	0	0	0	0	0	0	0	0	0	0	0	0	0	0	0	0	0	0	-3.86773	1.40495	0.401768	2.04614	-1.30628	1.32415	-0.0791882	-0.255259	0.181965	-0.538402	-1.02587	-1.57119	-0.737854	0.984976	-0.212027	-0.103791	0.502661	-0.0936331	-0.108334	0.558273	0
0	0	0	0	0	0	0	0	0	0	0	0	0	0	0	0	0	0	0	0	4.32374	-1.43158	-0.349536	1.12561	-0.72705	-0.684086	-0.563581	1.20522	1.59813	0.770855	0.457757	0.683795	-2.15021	-1.42218	0.823934	0.42532	-2.13804	0.532548	-1.06798	0
0	0	0	0	0	0	0	0	0	0	0	0	0	0	0	0	0	0	0	0	0	3.29457	0.238628	0.881361	-0.580954	-0.260228	-1.2856	-0.210251	0.86265	-0.855983	-0.440959	-0.700609	0.9061	-0.451369	-0.990128	-0.394602	-0.8553	0.346006	0.330484	0
0	0	0	0	0	0	0	0	0	0	0	0	0	0	0	0	0	0	0	0	0	0	-4.215	-1.10994	-0.42642	1.14454	-1.0912	1.51331	-0.567753	1.53738	-0.109169	-1.39619	0.84161	2.03175	0.873407	0.817594	1.2866	-0.311018	-0.215805	0
0	0	0	0	0	0	0	0	0	0	0	0	0	0	0	0	0	0	0	0	0	0	0	-4.26025	0.365245	-1.6582	0.294072	1.02145	1.05428	-0.360661	0.54943	-1.06724	-0.480195	0.145772	-0.907534	-0.205083	-0.179693	-0.144546	1.22108	0
0	0	0	0	0	0	0	0	0	0	0	0	0	0	0	0	0	0	0	0	0	0	0	0	-4.68467	0.395481	0.100014	0.129895	0.385037	-0.787183	1.67187	1.18962	0.108659	0.393204	0.187965	-1.04411	-0.376447	-1.27727	1.23556	0
0	0	0	0	0	0	0	0	0	0	0	0	0	0	0	0	0	0	0	0	0	0	0	0	0	-2.64733	0.915284	-0.527	-0.33218	-0.0602998	1.63137	1.38417	-0.455349	1.99074	0.312091	0.20131	-2.09806	1.04967	-0.584462	0
0	0	0	0	0	0	0	0	0	0	0	0	0	0	0	0	0	0	0	0	0	0	0	0	0	0	3.08336	-0.546739	-0.766178	1.51244	-0.470387	-0.316148	0.630881	0.484647	-1.52743	0.153396	0.0718362	0.358926	0.399036	0
0	0	0	0	0	0	0	0	0	0	0	0	0	0	0	0	0	0	0	0	0	0	0	0	0	0	0	-3.31067	0.888246	0.63053	-1.67527	-1.71651	0.719363	-0.311817	1.86178	0.757342	-0.552137	-0.298105	1.69454	0
0	0	0	0	0	0	0	0	0	0	0	0	0	0	0	0	0	0	0	0	0	0	0	0	0	0	0	0	3.30863	-0.84023	1.57077	-1.00227	-1.72898	-1.23351	-1.11542	-0.463559	1.44967	-1.43854	-0.0658083	0
0	0	0	0	0	0	0	0	0	0	0	0	0	0	0	0	0	0	0	0	0	0	0	0	0	0	0	0	0	-3.56407	-0.148716	0.85621	-0.513741	0.947224	1.65496	0.529693	1.40006	0.207507	-1.82378	0
0	0	0	0	0	0	0	0	0	0	0	0	0	0	0	0	0	0	0	0	0	0	0	0	0	0	0	0	0	0	4.76814	0.275313	0.0205234	-1.18186	-2.0056	1.10892	1.24932	-1.69865	-0.218016	0
0	0	0	0	0	0	0	0	0	0	0	0	0	0	0	0	0	0	0	0	0	0	0	0	0	0	0	0	0	0	0	3.052	0.185481	0.0849029	-0.0612882	-1.2231	0.405533	-1.98565	0.274319	0
0	0	0	0	0	0	0	0	0	0	0	0	0	0	0	0	0	0	0	0	0	0	0	0	0	0	0	0	0	0	0	0	1.71937	1.06256	0.226367	-1.652	0.608912	0.558987	-0.54438	0
0	0	0	0	0	0	0	0	0	0	0	0	0	0	0	0	0	0	0	0	0	0	0	0	0	0	0	0	0	0	0	0	0	1.92394	-1.29057	-0.32487	0.304706	1.33657	0.0240266	0
0	0	0	0	0	0	0	0	0	0	0	0	0	0	0	0	0	0	0	0	0	0	0	0	0	0	0	0	0	0	0	0	0	0	-2.54645	1.17202	-1.01227	0.135813	1.49934	0
0	0	0	0	0	0	0	0	0	0	0	0	0	0	0	0	0	0	0	0	0	0	0	0	0	0	0	0	0	0	0	0	0	0	0	-0.94634	-0.221879	0.529588	0.612382	0
0	0	0	0	0	0	0	0	0	0	0	0	0	0	0	0	0	0	0	0	0	0	0	0	0	0	0	0	0	0	0	0	0	0	0	0	0.904374	-1.58209	-1.11514	0
0	0	0	0	0	0	0	0	0	0	0	0	0	0	0	0	0	0	0	0	0	0	0	0	0	0	0	0	0	0	0	0	0	0	0	0	0	-0.737522	-0.268627	0
0	0	0	0	0	0	0	0	0	0	0	0	0	0	0	0	0	0	0	0	0	0	0	0	0	0	0	0	0	0	0	0	0	0	0	0	0	0	0.394855	0
0	0	0	0	0	0	0	0	0	0	0	0	0	0	0	0	0	0	0	0	0	0	0	0	0	0	0	0	0	0	0	0	0	0	0	0	0	0	0	0
-7.44978	-0.532086	0.141079	1.14941	-0.986138	-0.432202	-1.54984	-0.955462	0.141008	-1.74793	-0.235476	-1.84115	-0.968611	-0.882886	0.0497617	-1.51236	-0.182069	0.620521	-0.763065	0.737545	-0.208736	0.37447	0.240986	0.853474	-0.451723	-0.814743	-1.07835	0.674258	-0.0962497	-0.265419	0.817872	0.342086	-1.95269	2.07164	-1.5358	0.0677155	0.41925	1.59118	1.92403	-0.377248
0	5.74645	-0.921568	-0.184912	1.37968	-1.34113	-1.47493	-0.422326	-0.887951	0.199947	0.473387	-0.619375	-1.42396	0.425532	-1.3713	-0.778147	-0.166118	0.155933	-1.95357	-1.58125	-0.502949	0.0613489	1.44757	0.38247	0.487705	-0.36687	-0.551834	1.57511	-0.00606767	-0.436951	1.77032	0.319628	0.380812	2.28337	-0.343048	-1.00053	-0.994369	0.10804	-0.102173	-1.9604
0	0	-6.12055	-0.0632088	-0.653631	-0.643381	-1.06054	-2.50727	0.114173	0.46359	-0.707447	1.93493	0.674376	1.29562	0.434198	-0.182471	-1.46692	-1.07771	0.563021	1.00357	1.12769	0.229732	0.403483	0.4739	-1.74886	0.161775	0.716151	1.59461	-0.721494	-0.726368	-0.18037	-0.00305581	-0.938821	0.092361	-0.121451	-0.0129551	-0.302698	-0.420404	-0.618691	0.0197372
0	0	0	5.87915	0.619803	1.80996	0.77483	0.209849	-0.478715	-0.34338	0.696134	-1.15024	1.71242	1.413	-0.1702	0.914548	-1.36242	-0.791021	0.0563508	-0.0150372	1.37808	0.151613	-2.79653	-0.950106	-0.507404	0.266516	-1.2676	-0.275893	-0.043079	0.276992	-0.390084	-0.524254	0.304008	0.13293	0.748883	-0.208272	0.387368	2.60251	0.764659	1.04198
0	0	0	0	-5.5483	-0.24645	-0.449426	1.29719	-0.3845	0.305961	-0.22842	-1.04781	-1.12729	1.13738	-0.567431	-0.103257	0.944156	2.41043	-0.0535182	-0.308883	0.17733	-1.27486	-0.55353	0.0114045	0.0581822	-0.075982	-0.0235711	-0.101392	-0.341453	1.07037	-0.0693156	-0.234865	0.480669	-1.03163	0.630198	-1.41857	0.612343	-0.993629	0.115264	-0.798978
0	0	0	0	0	-5.37017	1.14997	0.688072	0.428594	0.445355	-0.177221	0.131988	0.884036	-0.21721	-0.226478	0.21202	-0.81493	1.59875	0.221207	-1.75692	2.16646	-1.45634	0.78309	-0.2786	0.616375	-0.926038	0.332636	-0.161508	-1.02049	1.95137	1.01586	-0.284575	0.508931	-0.577735	1.20419	1.17841	0.715171	-1.06654	0.401494	0.706527
0	0	0	0	0	0	-5.45759	-0.371493	-1.25988	0.393108	-0.112369	0.22777	-0.306853	0.488282	-1.22523	-0.137246	-0.907962	-0.837023	-0.318002	0.450274	-1.21839	0.447954	-2.06797	0.0572525	0.810089	-0.401094	0.399119	-0.335242	-1.99961	0.710915	-0.321413	-0.619804	1.46248	0.343636	2.09797	1.12574	-1.23872	0.252158	-1.25011	1.00475
0	0	0	0	0	0	0	5.83263	0.836833	-0.137906	-1.24384	0.631114	0.324068	1.58899	0.772785	-0.63726	-0.502263	-1.09592	-0.43517	-0.921288	0.295978	0.220883	0.0993884	-0.256319	0.629012	-0.706071	0.704627	-0.56975	-2.04826	-2.52583	-0.633646	-0.218802	-0.565351	-0.656343	1.67751	-0.772896	-0.172173	0.416771	1.05132	0.583196
0	0	0	0	0	0	0	0	-5.82559	0.450187	-1.7295	-1.05644	-0.247214	-0.258968	-1.21106	-0.215663	0.172942	1.33563	0.0309944	-0.686845	-0.232332	-1.09744	1.14816	-0.81764	1.28941	-2.79876	-0.192	-1.5853	0.495586	0.341874	1.05991	0.602122	-1.09462	0.856321	-0.355789	-0.915154	-0.918663	0.094822	-0.332533	-0.958288
0	0	0	0	0	0	0	0	0	-4.67424	-1.10519	-0.0555087	-0.191646	0.691062	-0.930133	-1.08746	1.10041	-1.10421	-1.27231	1.44591	0.628493	0.810449	-0.0132019	-0.734895	-0.752437	-1.47493	0.012094	-0.850413	1.27852	-0.85409	2.78692	0.663282	0.241925	-0.70453	-0.654051	0.825275	1.72892	0.390342	-0.335522	1.04243
0	0	0	0	0	0	0	0	0	0	3.50051	-0.448265	-1.2352	0.258285	1.29275	0.547067	-0.86312	-0.00829112	0.409069	-1.72917	-0.818253	0.279749	0.250475	0.189503	-0.0764455	0.936264	-0.494796	0.928068	-0.132652	1.40441	-0.704664	-1.66504	0.957369	-0.682821	1.16432	0.278328	-0.465655	0.269492	-0.475874	-0.18619
0	0	0	0	0	0	0	0	0	0	0	-5.01968	-1.70814	1.33818	0.154632	1.01984	0.361672	-2.00091	0.260236	-0.744601	0.322082	0.0968054	0.680111	0.0682167	-0.29222	1.56376	0.609258	-0.208147	-1.19461	-0.136411	1.67136	1.44326	1.91518	0.720984	-1.3781	-0.992541	0.0746913	0.240874	-0.466413	0.290174
0	0	0	0	0	0	0	0	0	0	0	0	3.53782	-0.0908808	0.390478	0.490782	0.00151891	-1.78387	-0.17136	0.598923	1.03411	0.869806	-0.186728	1.36006	0.0527143	0.997806	-0.532204	1.42333	-0.490672	-1.22153	0.501879	0.268051	-1.24531	-0.255612	-0.446327	0.706261	-0.112618	-0.299867	0.019725	0.0439603
0	0	0	0	0	0	0	0	0	0	0	0	0	-6.08969	0.837117	0.38338	-1.89759	0.211716	0.215982	0.417586	0.715193	-0.369694	1.11444	0.520926	-0.784114	0.494213	-0.0340919	-0.555546	0.205013	0.569922	-1.71874	0.448025	-1.61723	0.172794	-1.49323	-1.3176	1.78643	-0.735372	-0.640357	0.380277
0	0	0	0	0	0	0	0	0	0	0	0	0	0	4.9492	-0.549654	-0.168319	0.210697	-0.725006	1.07887	0.471799	0.422466	0.159597	-0.399718	0.223728	-0.661096	-0.121151	-0.236099	-0.70158	0.0473368	1.11392	-0.0780161	-1.0387	0.68875	-0.0943776	1.01145	-0.689018	0.190791	0.20557	0.114177
0	0	0	0	0	0	0	0	0	0	0	0	0	0	0	-6.19375	-1.05285	0.973577	-0.174649	2.59984	0.776763	-1.07926	-0.776728	2.03202	-1.22047	-0.699577	-1.15278	-1.04314	0.328774	1.22356	1.07291	-0.886267	-0.810504	0.0112924	0.257522	-0.224611	0.36924	-1.43006	-0.975649	1.59423
0	0	0	0	0	0	0	0	0	0	0	0	0	0	0	0	4.67358	-0.0345797	-1.26711	-0.754548	0.255321	0.887346	0.497687	0.808264	0.407173	1.37226	0.770936	-0.266896	-1.55364	-0.361037	-0.601873	0.258937	0.575308	-0.692993	0.694505	0.319955	0.589443	-0.857756	-0.922706	-1.7454
0	0	0	0	0	0	0	0	0	0	0	0	0	0	0	0	0	3.91916	-0.660786	1.10316	-1.66303	-1.60532	-0.703002	0.655661	0.97829	-0.69789	-0.357156	0.564086	0.403373	0.351756	-2.08325	-1.50459	1.17675	-0.374978	-2.41365	1.78092	1.26256	1.39506	-1.49122	-1.03522
0	0	0	0	0	0	0	0	0	0	0	0	0	0	0	0	0	0	3.86731	0.440648	0.493932	-0.749767	-0.345065	1.33247	-0.0560155	0.791295	-0.216377	-1.43886	-1.29969	-1.00166	-1.1908	-1.93145	1.61627	0.187414	-0.38958	-2.21901	-0.654257	-0.567169	-0.499998	0.176498
0	0	0	0	0	0	0	0	0	0	0	0	0	0	0	0	0	0	0	-3.65346	0.0157455	-0.750048	-0.984903	0.451846	-0.130632	-0.705528	-0.757025	-0.0402569	-0.54382	-0.921623	-1.96092	0.340708	0.534401	1.09237	1.88532	-2.06856	2.11162	-1.78373	0.195615	1.0975
0	0	0	0	0	0	0	0	0	0	0	0	0	0	0	0	0	0	0	0	3.47054	0.460968	-0.919823	0.428428	0.984349	-0.633351	0.481653	1.48566	-0.713203	-1.27332	1.33122	-1.18935	-0.330953	-0.571391	1.25162	2.33884	0.718977	-0.77917	-3.66006	-1.12794
0	0	0	0	0	0	0	0	0	0	0	0	0	0	0	0	0	0	0	0	0	3.17951	-1.56511	-1.77422	-0.822878	1.98083	0.0223084	-0.387499	-0.32722	1.42073	-0.693807	-1.4203	0.0605197	-1.70941	-0.418467	-0.573978	-0.923642	-1.29842	-0.775562	0.289111
0	0	0	0	0	0	0	0	0	0	0	0	0	0	0	0	0	0	0	0	0	0	3.71268	0.293048	-0.157165	-0.267447	0.813448	0.56327	-0.956789	0.775016	-0.525857	-0.748258	1.59159	1.00272	-0.575761	0.2265	0.523677	0.499772	1.01229	-0.477551
0	0	0	0	0	0	0	0	0	0	0	0	0	0	0	0	0	0	0	0	0	0	0	5.01302	-1.05069	1.33068	0.130512	1.48801	1.3717	-0.111417	-0.185696	-1.15955	0.835387	0.551852	-1.47949	-0.631006	0.472721	-0.0881596	1.12434	-0.720997
0	0	0	0	0	0	0	0	0	0	0	0	0	0	0	0	0	0	0	0	0	0	0	0	-3.35347	0.586039	-0.558053	0.280603	0.959846	-0.337372	0.579521	0.583233	-0.543389	-1.07908	0.273935	-1.30502	0.989916	-0.599394	0.753597	0.772855
0	0	0	0	0	0	0	0	0	0	0	0	0	0	0	0	0	0	0	0	0	0	0	0	0	3.32575	0.928432	3.26184	0.582529	-0.0993351	1.04773	-0.441155	0.297659	1.31226	0.813455	0.726066	-0.940745	0.543249	-0.100994	-0.187969
0	0	0	0	0	0	0	0	0	0	0	0	0	0	0	0	0	0	0	0	0	0	0	0	0	0	3.56727	0.680793	-0.539497	0.986704	0.617288	0.596101	2.08103	-0.472117	0.664235	-1.34123	1.90392	-0.898968	0.0868144	-0.754512
0	0	0	0	0	0	0	0	0	0	0	0	0	0	0	0	0	0	0	0	0	0	0	0	0	0	0	2.93248	-1.00097	-0.486264	1.74148	1.20352	1.55335	-0.117221	1.32227	-0.00341017	-0.928647	1.47129	0.904546	1.31692
0	0	0	0	0	0	0	0	0	0	0	0	0	0	0	0	0	0	0	0	0	0	0	0	0	0	0	0	2.91345	0.149254	-0.148372	0.0777379	-0.0369405	1.7772	-0.300278	1.996	-1.30992	0.0504561	-0.88456	-0.979843
0	0	0	0	0	0	0	0	0	0	0	0	0	0	0	0	0	0	0	0	0	0	0	0	0	0	0	0	0	-3.53159	0.701621	0.175423	-1.58709	0.587095	-0.78292	-1.40226	0.143027	0.484657	0.718776	0.4457
0	0	0	0	0	0	0	0	0	0	0	0	0	0	0	0	0	0	0	0	0	0	0	0	0	0	0	0	0	0	-2.92554	-0.810259	-0.38393	0.151556	-0.549051	0.335837	-0.655867	-2.35838	0.260554	-1.08395
0	0	0	0	0	0	0	0	0	0	0	0	0	0	0	0	0	0	0	0	0	0	0	0	0	0	0	0	0	0	0	-2.32738	0.849457	0.103408	0.851519	-0.44952	1.86324	-1.32294	0.723266	0.10985
0	0	0	0	0	0	0	0	0	0	0	0	0	0	0	0	0	0	0	0	0	0	0	0	0	0	0	0	0	0	0	0	2.77028	-1.69786	1.32836	-0.224879	1.97628	1.35999	1.65237	-0.432283
0	0	0	0	0	0	0	0	0	0	0	0	0	0	0	0	0	0	0	0	0	0	0	0	0	0	0	0	0	0	0	0	0	1.95573	2.05684	0.228166	1.21699	1.28571	1.51646	0.490897
0	0	0	0	0	0	0	0	0	0	0	0	0	0	0	0	0	0	0	0	0	0	0	0	0	0	0	0	0	0	0	0	0	0	-2.0479	-0.216339	-1.13243	-0.299922	-0.583678	1.22502
0	0	0	0	0	0	0	0	0	0	0	0	0	0	0	0	0	0	0	0	0	0	0	0	0	0	0	0	0	0	0	0	0	0	0	1.75133	1.18107	-0.0303816	-0.308897	0.952316
0	0	0	0	0	0	0	0	0	0	0	0	0	0	0	0	0	0	0	0	0	0	0	0	0	0	0	0	0	0	0	0	0	0	0	0	1.36698	-2.14871	0.498684	-0.601622
0	0	0	0	0	0	0	0	0	0	0	0	0	0	0	0	0	0	0	0	0	0	0	0	0	0	0	0	0	0	0	0	0	0	0	0	0	-1.7001	1.17543	0.555075
0	0	0	0	0	0	0	0	0	0	0	0	0	0	0	0	0	0	0	0	0	0	0	0	0	0	0	0	0	0	0	0	0	0	0	0	0	0	-1.34737	-1.77649
0	0	0	0	0	0	0	0	0	0	0	0	0	0	0	0	0	0	0	0	0	0	0	0	0	0	0	0	0	0	0	0	0	0	0	0	0	0	0	0.28217
5-dimensional	7.99459	-6.83397	-1.03418	0.185022	0.802549
2	-6.83397	11.9436	-1.61519	-0.405817	-1.64223
3	-1.03418	-1.61519	3.18778	-0.59316	1.22364
4	0.185022	-0.405817	-0.59316	0.748449	-0.0902538
5	0.802549	-1.64223	1.22364	-0.0902538	0.813118
6-dimensional	9.24247	-2.2097	-2.06373	-6.17772	-3.59137	4.72289
2	-2.2097	8.20156	-5.37828	-0.264598	-5.27716	0.352815
3	-2.06373	-5.37828	9.1936	4.5233	2.7601	-0.918752
4	-6.17772	-0.264598	4.5233	8.39419	2.39032	0.119935
5	-3.59137	-5.27716	2.7601	2.39032	23.1283	-5.37716
6	4.72289	0.352815	-0.918752	0.119935	-5.37716	8.26147
7-dimensional	12.0808	-3.05931	-2.77923	-0.183388	-1.19288	-0.801968	-5.32234
2	-3.05931	17.6972	1.47944	0.171275	-5.1866	-0.434743	-2.64284
3	-2.77923	1.47944	27.0693	1.92636	13.1798	1.14867	-2.88753
4	-0.183388	0.171275	1.92636	12.9521	2.77824	-1.56169	-3.63544
5	-1.19288	-5.1866	13.1798	2.77824	19.9923	2.59923	-3.96905
6	-0.801968	-0.434743	1.14867	-1.56169	2.59923	1.95785	-0.121412
7	-5.32234	-2.64284	-2.88753	-3.63544	-3.96905	-0.121412	7.56969
8-dimensional	6.01062	-1.6748	2.62793	-1.86311	8.28049	-3.63947	-0.28954	1.08092
2	-1.6748	39.1161	-2.89273	-2.51751	-3.96176	1.53144	1.07984	0.149867
3	2.62793	-2.89273	10.2345	5.01607	6.92481	2.13601	1.46761	-0.292224
4	-1.86311	-2.51751	5.01607	12.2273	-2.72536	4.81625	0.839997	-1.11253
5	8.28049	-3.96176	6.92481	-2.72536	17.646	-4.99042	-2.12093	1.61379
6	-3.63947	1.53144	2.13601	4.81625	-4.99042	7.75367	1.86285	-1.25556
7	-0.28954	1.07984	1.46761	0.839997	-2.12093	1.86285	2.65633	-0.288567
8	1.08092	0.149867	-0.292224	-1.11253	1.61379	-1.25556	-0.288567	0.389299
9-dimensional	23.6124	-17.0798	-38.038	-0.849126	-4.02901	-10.8949	-3.12011	-0.548113	-0.361631
2	-17.0798	44.1879	26.1261	-4.94444	3.92891	8.32869	0.940824	-5.26304	2.20828
3	-38.038	26.1261	76.4459	-2.21579	10.289	12.0678	12.1081	3.83228	-0.445257
4	-0.849126	-4.94444	-2.21579	7.88477	0.37331	7.44785	-5.28435	-0.0884379	-0.137968
5	-4.02901	3.92891	10.289	0.37331	20.2054	6.86447	5.25435	-1.27149	0.370341
6	-10.8949	8.32869	12.0678	7.44785	6.86447	29.7082	-5.0281	-0.0600154	-0.204901
7	-3.12011	0.940824	12.1081	-5.28435	5.25435	-5.0281	16.464	4.1704	-0.543304
8	-0.548113	-5.26304	3.83228	-0.0884379	-1.27149	-0.0600154	4.1704	6.63273	-1.23485
9	-0.361631	2.20828	-0.445257	-0.137968	0.370341	-0.204901	-0.543304	-1.23485	0.450425
10-dimensional	26.737	18.5996	13.1279	-10.8169	-8.17884	13.8458	9.81906	-0.120634	8.32517	-4.25756
2	18.5996	41.1365	4.04225	-4.50584	1.77022	7.7774	7.18089	1.26579	-0.672895	0.811118
3	13.1279	4.04225	61.137	-6.4687	-10.0301	11.665	6.48224	-9.51011	7.59715	-4.90149
4	-10.8169	-4.50584	-6.4687	8.12192	-0.0937508	-6.11356	-9.37524	-0.523835	-4.26918	0.498793
5	-8.17884	1.77022	-10.0301	-0.0937508	25.3266	-3.82417	8.52035	3.40091	-5.02581	6.40627
6	13.8458	7.7774	11.665	-6.11356	-3.82417	40.0478	11.387	2.27437	-13.2763	0.7714
7	9.81906	7.18089	6.48224	-9.37524	8.52035	11.387	16.701	-0.665005	-0.156477	2.85409
8	-0.120634	1.26579	-9.51011	-0.523835	3.40091	2.27437	-0.665005	11.0348	-2.56383	0.883756
9	8.32517	-0.672895	7.59715	-4.26918	-5.02581	-13.2763	-0.156477	-2.56383	15.9441	-4.85825
10	-4.25756	0.811118	-4.90149	0.498793	6.40627	0.7714	2.85409	0.883756	-4.85825	3.23548
11-dimensional	11.8515	-0.339369	-6.07279	11.348	1.2813	10.914	14.5851	2.54193	-2.29647	0.412449	4.51765
2	-0.339369	19.9647	-0.986336	0.436248	2.24343	5.54377	6.87203	0.794581	-2.82025	0.0372225	2.26323
3	-6.07279	-0.986336	34.6707	-22.9807	-2.91674	-1.63009	7.23366	-6.40436	-0.292736	0.562263	0.975334
4	11.348	0.436248	-22.9807	70.8391	9.31374	8.80987	-3.34286	21.1853	3.57293	-0.0356639	-1.99768
5	1.2813	2.24343	-2.91674	9.31374	6.0892	2.41037	-0.00590044	3.81661	0.882796	-0.022341	0.439318
6	10.914	5.54377	-1.63009	8.80987	2.41037	17.3615	17.7089	2.86289	-0.710592	0.794832	7.16546
7	14.5851	6.87203	7.23366	-3.34286	-0.00590044	17.7089	35.5135	-1.44431	-5.39812	1.36754	9.09921
8	2.54193	0.794581	-6.40436	21.1853	3.81661	2.86289	-1.44431	8.85004	1.82743	0.0158719	-1.05055
9	-2.29647	-2.82025	-0.292736	3.57293	0.882796	-0.710592	-5.39812	1.82743	6.99262	0.487787	-0.197483
10	0.412449	0.0372225	0.562263	-0.0356639	-0.022341	0.794832	1.36754	0.0158719	0.487787	0.1518	0.447764
11	4.51765	2.26323	0.975334	-1.99768	0.439318	7.16546	9.09921	-1.05055	-0.197483	0.447764	4.15323
12-dimensional	23.3604	22.9752	-12.027	-5.86641	2.18713	3.01452	-0.356696	11.1264	-6.67965	2.25974	3.08197	2.11266
2	22.9752	63.433	3.6632	-6.49697	36.7051	20.0235	19.4203	33.1946	-4.09204	8.48608	11.212	10.288
3	-12.027	3.6632	74.2387	-3.58684	10.7483	14.5608	-3.116	14.4015	3.20188	3.41308	10.6906	6.09909
4	-5.86641	-6.49697	-3.58684	18.4481	-0.805115	-12.4788	6.98119	-7.64635	2.46638	-4.65797	-8.2357	-2.12484
5	2.18713	36.7051	10.7483	-0.805115	74.8676	18.7594	48.2426	37.3119	-2.7411	8.88135	11.1925	11.8379
6	3.01452	20.0235	14.5608	-12.4788	18.7594	35.1582	-0.67107	28.0881	-3.76862	5.98716	12.0022	9.13964
7	-0.356696	19.4203	-3.116	6.98119	48.2426	-0.67107	50.2197	9.83537	-3.23645	4.03332	0.279714	2.17853
8	11.1264	33.1946	14.4015	-7.64635	37.3119	28.0881	9.83537	51.9066	0.014107	11.5703	19.4433	16.9555
9	-6.67965	-4.09204	3.20188	2.46638	-2.7411	-3.76862	-3.23645	0.014107	8.82011	1.25917	3.80859	1.3152
10	2.25974	8.48608	3.41308	-4.65797	8.88135	5.98716	4.03332	11.5703	1.25917	4.86106	6.3168	3.6963
11	3.08197	11.212	10.6906	-8.2357	11.1925	12.0022	0.279714	19.4433	3.80859	6.3168	15.8501	7.27798
12	2.11266	10.288	6.09909	-2.12484	11.8379	9.13964	2.17853	16.9555	1.3152	3.6963	7.27798	5.89487
13-dimensional	24.8752	27.3104	9.63089	-3.38733	-6.15574	-8.34457	-2.87355	12.6524	-3.75224	-3.88534	0.62675	-3.21299	-0.219929
2	27.3104	138.218	44.864	-22.8456	-27.3484	-7.6835	47.9926	12.8945	5.18676	10.0235	1.10541	10.3932	1.74001
3	9.63089	44.864	114.434	-44.7074	-54.736	34.2238	-16.8504	-0.2155	1.85822	-5.12986	-1.2556	-3.50581	-0.835115
4	-3.38733	-22.8456	-44.7074	90.8714	40.7685	21.9856	-8.70388	15.3721	-20.6789	1.28422	-26.7905	17.1255	-5.43885
5	-6.15574	-27.3484	-54.736	40.7685	112.015	4.84157	-15.9098	-4.05893	18.6917	-8.08533	26.8345	-26.6517	4.1161
6	-8.34457	-7.6835	34.2238	21.9856	4.84157	85.3384	-16.2451	5.67899	-10.7009	-8.23177	-6.39384	-0.910365	-1.92208
7	-2.87355	47.9926	-16.8504	-8.70388	-15.9098	-16.2451	59.9146	15.8277	3.19839	14.6143	-5.09107	18.9678	1.12246
8	12.6524	12.8945	-0.2155	15.3721	-4.05893	5.67899	15.8277	42.8827	-14.4615	2.71224	-23.2023	19.4324	-4.14556
9	-3.75224	5.18676	1.85822	-20.6789	18.6917	-10.7009	3.19839	-14.4615	35.6008	-4.25071	33.1585	-25.7463	6.32714
10	-3.88534	10.0235	-5.12986	1.28422	-8.08533	-8.23177	14.6143	2.71224	-4.25071	9.11738	-9.12195	11.7288	-0.999245
11	0.62675	1.10541	-1.2556	-26.7905	26.8345	-6.39384	-5.09107	-23.2023	33.1585	-9.12195	45.3253	-36.5368	8.02239
12	-3.21299	10.3932	-3.50581	17.1255	-26.6517	-0.910365	18.9678	19.4324	-25.7463	11.7288	-36.5368	34.3535	-5.96864
13	-0.219929	1.74001	-0.835115	-5.43885	4.1161	-1.92208	1.12246	-4.14556	6.32714	-0.999245	8.02239	-5.96864	1.53549
14-dimensional	71.7396	-8.94453	39.9122	-2.05984	20.4912	22.9362	24.4375	40.0486	5.69347	-40.1884	10.2288	5.15672	-2.33395	-0.027991
2	-8.94453	313.115	-33.0549	0.881866	-75.5561	-23.2274	-47.617	13.7575	-24.8867	4.73682	11.4308	15.9492	-24.3964	-14.3257
3	39.9122	-33.0549	106.974	-2.09565	28.8541	0.546311	58.7982	22.7287	-7.63066	-17.5038	22.8435	2.49057	-5.82732	-3.14051
4	-2.05984	0.881866	-2.09565	61.2385	38.9938	-5.96492	5.45435	22.9314	-2.48025	6.98875	1.3063	-0.648497	0.0251488	-0.0966894
5	20.4912	-75.5561	28.8541	38.9938	196.596	11.7436	22.4788	28.5924	10.0963	-14.8615	-28.1292	6.1241	18.9547	12.205
6	22.9362	-23.2274	0.546311	-5.96492	11.7436	72.7347	11.1363	13.6655	12.7557	-42.2113	-12.4978	13.8509	24.8726	14.276
7	24.4375	-47.617	58.7982	5.45435	22.4788	11.1363	108.589	-8.76728	13.3281	6.81602	14.0242	-6.25464	-4.32818	-2.78956
8	40.0486	13.7575	22.7287	22.9314	28.5924	13.6655	-8.76728	115.852	-14.9377	-52.5095	-28.5382	25.9571	-9.24212	-2.17175
9	5.69347	-24.8867	-7.63066	-2.48025	10.0963	12.7557	13.3281	-14.9377	44.9189	5.40007	22.3822	-19.1253	11.9468	5.64574
10	-40.1884	4.73682	-17.5038	6.98875	-14.8615	-42.2113	6.81602	-52.5095	5.40007	71.8135	19.691	-22.928	-11.5355	-8.12496
11	10.2288	11.4308	22.8435	1.3063	-28.1292	-12.4978	14.0242	-28.5382	22.3822	19.691	102.606	-17.8086	-27.0507	-18.7075
12	5.15672	15.9492	2.49057	-0.648497	6.1241	13.8509	-6.25464	25.9571	-19.1253	-22.928	-17.8086	22.0677	-3.61921	-0.954564
13	-2.33395	-24.3964	-5.82732	0.0251488	18.9547	24.8726	-4.32818	-9.24212	11.9468	-11.5355	-27.0507	-3.61921	31.0513	17.5887
14	-0.027991	-14.3257	-3.14051	-0.0966894	12.205	14.276	-2.78956	-2.17175	5.64574	-8.12496	-18.7075	-0.954564	17.5887	10.1583
15-dimensional	71.2962	66.9477	86.4265	43.057	-14.6548	-44.6214	-12.1513	-6.72404	-23.5233	13.1833	13.448	12.5893	3.39748	12.5874	0.472003
2	66.9477	196.72	102.571	-2.73634	-24.8655	-9.79852	6.24041	10.2329	-39.8052	1.33664	-0.838699	1.36507	0.248615	1.73362	-0.0724618
3	86.4265	102.571	268.828	-4.2269	-64.5617	-11.7753	-7.95981	-1.9027	15.9095	27.6829	9.02467	12.7303	13.4739	13.2276	0.667738
4	43.057	-2.73634	-4.2269	129.205	52.3017	-22.5894	-22.106	-4.7533	-28.6341	1.61386	25.5921	14.7762	-2.21678	12.5543	0.271982
5	-14.6548	-24.8655	-64.5617	52.3017	165.734	0.0278519	-0.998786	-30.5809	22.8977	-18.0872	-16.8325	-10.6961	-6.29478	3.51967	0.309239
6	-44.6214	-9.79852	-11.7753	-22.5894	0.0278519	157.959	42.029	6.09732	41.7593	12.0273	25.8172	12.626	-7.65106	-22.4374	-1.264
7	-12.1513	6.24041	-7.95981	-22.106	-0.998786	42.029	61.1167	-1.37045	32.5735	12.9546	-7.89484	-4.28845	4.92209	-10.0072	-0.210343
8	-6.72404	10.2329	-1.9027	-4.7533	-30.5809	6.09732	-1.37045	92.5094	-82.5421	6.54754	6.7638	7.49091	-6.76644	-11.1914	-0.54724
9	-23.5233	-39.8052	15.9095	-28.6341	22.8977	41.7593	32.5735	-82.5421	136.467	2.10329	-7.64293	-8.09909	9.21346	1.07354	0.146547
10	13.1833	1.33664	27.6829	1.61386	-18.0872	12.0273	12.9546	6.54754	2.10329	29.837	3.67569	9.37436	10.6959	1.89211e-06	0.134103
11	13.448	-0.838699	9.02467	25.5921	-16.8325	25.8172	-7.89484	6.7638	-7.64293	3.67569	44.7771	16.3204	-2.57578	1.3453	-0.399544
12	12.5893	1.36507	12.7303	14.7762	-10.6961	12.626	-4.28845	7.49091	-8.09909	9.37436	16.3204	11.7767	-1.27372	0.152262	-0.137095
13	3.39748	0.248615	13.4739	-2.21678	-6.29478	-7.65106	4.92209	-6.76644	9.21346	10.6959	-2.57578	-1.27372	12.9381	6.47444	0.359747
14	12.5874	1.73362	13.2276	12.5543	3.51967	-22.4374	-10.0072	-11.1914	1.07354	1.89211e-06	1.3453	0.152262	6.47444	11.7116	0.502993
15	0.472003	-0.0724618	0.667738	0.271982	0.309239	-1.264	-0.210343	-0.54724	0.146547	0.134103	-0.399544	-0.137095	0.359747	0.502993	0.0312877
16-dimensional	146.618	31.8536	123.723	-12.3275	17.6994	55.9459	84.325	36.6704	8.19283	-43.5615	-26.5271	9.51727	21.8456	-12.5634	-12.5565	-31.0014
2	31.8536	350.093	-10.0277	-7.85272	-26.7576	35.8588	60.7691	20.7583	62.086	76.2888	-54.1866	8.98787	16.0596	-29.4672	9.79409	1.08256
3	123.723	-10.0277	243.245	-39.814	-66.2236	24.3724	45.7617	29.2743	-2.79122	-44.4018	19.2775	4.41847	2.13367	3.32208	12.2316	-25.9136
4	-12.3275	-7.85272	-39.814	209.101	73.412	-25.4133	-4.96557	-16.5213	19.9523	49.4568	11.6393	4.20153	2.27411	9.5979	-4.62421	31.0241
5	17.6994	-26.7576	-66.2236	73.412	251.089	32.2295	-7.77185	-40.5495	-55.5269	17.9312	-15.6274	31.0742	7.43347	34.4471	-28.1181	10.8926
6	55.9459	35.8588	24.3724	-25.4133	32.2295	174.602	46.5921	4.16584	-7.49176	9.3711	-103.6	5.60532	13.9643	-27.1982	8.01549	-58.0117
7	84.325	60.7691	45.7617	-4.96557	-7.77185	46.5921	157.501	41.172	82.9883	-0.446405	-31.6926	19.5975	12.9893	-22.6316	-3.05989	-30.6762
8	36.6704	20.7583	29.2743	-16.5213	-40.5495	4.16584	41.172	91.501	40.1848	-34.8803	-9.15802	15.2815	20.4205	-11.7761	14.4156	-24.467
9	8.19283	62.086	-2.79122	19.9523	-55.5269	-7.49176	82.9883	40.1848	195.678	41.9575	-37.9373	-21.525	5.49655	-31.8897	-10.7894	-1.15088
10	-43.5615	76.2888	-44.4018	49.4568	17.9312	9.3711	-0.446405	-34.8803	41.9575	105.096	-24.7469	-13.9241	-6.77339	5.43175	24.1567	13.7249
11	-26.5271	-54.1866	19.2775	11.6393	-15.6274	-103.6	-31.6926	-9.15802	-37.9373	-24.7469	127.004	24.8352	-15.9298	29.8153	5.08537	31.8975
12	9.51727	8.98787	4.41847	4.20153	31.0742	5.60532	19.5975	15.2815	-21.525	-13.9241	24.8352	68.8374	13.9398	9.78491	-19.0429	-0.221581
13	21.8456	16.0596	2.13367	2.27411	7.43347	13.9643	12.9893	20.4205	5.49655	-6.77339	-15.9298	13.9398	14.6054	-8.46192	-11.2202	-3.55971
14	-12.5634	-29.4672	3.32208	9.5979	34.4471	-27.1982	-22.6316	-11.7761	-31.8897	5.43175	29.8153	9.78491	-8.46192	38.8202	16.891	8.07391
15	-12.5565	9.79409	12.2316	-4.62421	-28.1181	8.01549	-3.05989	14.4156	-10.7894	24.1567	5.08537	-19.0429	-11.2202	16.891	62.529	-21.901
16	-31.0014	1.08256	-25.9136	31.0241	10.8926	-58.0117	-30.6762	-24.467	-1.15088	13.7249	31.8975	-0.221581	-3.55971	8.07391	-21.901	37.7476
17-dimensional	99.4079	19.8574	-45.4244	-10.5367	16.2594	38.7557	-12.202	63.4117	-17.7317	-11.503	11.1568	-12.6357	17.1355	-14.3209	1.55664	5.52725	0.367565
2	19.8574	311.608	207.952	-46.1356	19.2942	41.5783	-30.5008	38.5797	6.36824	9.29588	-22.5043	22.0346	-13.5102	-16.7694	-1.89618	-39.7643	-6.02076
3	-45.4244	207.952	425	34.6678	11.4714	50.3868	2.90363	127.949	25.1724	37.5363	-52.4471	-25.1987	-13.0203	-17.1507	9.49907	-61.3923	-5.63433
4	-10.5367	-46.1356	34.6678	140.327	-17.7497	4.78541	37.6829	43.8768	-24.5658	-20.8568	-26.7378	-42.2827	-2.16128	6.69965	15.5493	-27.0776	0.123417
5	16.2594	19.2942	11.4714	-17.7497	63.6537	-19.7728	12.6808	66.565	17.691	-1.27071	7.22124	39.7486	-11.6093	-17.6883	-13.0831	-8.10985	-3.6897
6	38.7557	41.5783	50.3868	4.78541	-19.7728	194.914	-43.1412	14.5226	-54.1324	54.3283	-11.134	-23.748	26.2836	6.59576	15.9286	-3.76646	3.30153
7	-12.202	-30.5008	2.90363	37.6829	12.6808	-43.1412	57.4627	40.195	17.8374	-14.6746	10.4282	10.4473	-7.71557	10.369	-0.187016	1.23592	-0.891327
8	63.4117	38.5797	127.949	43.8768	66.565	14.5226	40.195	323.687	72.2187	2.93028	-13.101	26.4021	-34.2554	-36.6018	-13.4713	-36.9305	-7.80008
9	-17.7317	6.36824	25.1724	-24.5658	17.691	-54.1324	17.8374	72.2187	127.72	-14.3549	14.0321	30.2112	-29.7426	-19.8013	-19.1845	-16.8343	-5.38065
10	-11.503	9.29588	37.5363	-20.8568	-1.27071	54.3283	-14.6746	2.93028	-14.3549	210.976	-2.61199	-21.7878	9.56463	-24.1178	5.2268	7.50396	1.45682
11	11.1568	-22.5043	-52.4471	-26.7378	7.22124	-11.134	10.4282	-13.101	14.0321	-2.61199	53.4229	27.3985	8.73495	1.24364	-16.1106	39.3621	2.43708
12	-12.6357	22.0346	-25.1987	-42.2827	39.7486	-23.748	10.4473	26.4021	30.2112	-21.7878	27.3985	97.5363	-27.7676	18.5811	-22.4085	6.05531	-3.5887
13	17.1355	-13.5102	-13.0203	-2.16128	-11.6093	26.2836	-7.71557	-34.2554	-29.7426	9.56463	8.73495	-27.7676	33.2476	-12.4485	9.24604	21.0835	4.05752
14	-14.3209	-16.7694	-17.1507	6.69965	-17.6883	6.59576	10.369	-36.6018	-19.8013	-24.1178	1.24364	18.5811	-12.4485	53.5026	3.03631	6.1256	1.48776
15	1.55664	-1.89618	9.49907	15.5493	-13.0831	15.9286	-0.187016	-13.4713	-19.1845	5.2268	-16.1106	-22.4085	9.24604	3.03631	14.3522	-5.28692	1.2595
16	5.52725	-39.7643	-61.3923	-27.0776	-8.10985	-3.76646	1.23592	-36.9305	-16.8343	7.50396	39.3621	6.05531	21.0835	6.1256	-5.28692	49.8968	5.18616
17	0.367565	-6.02076	-5.63433	0.123417	-3.6897	3.30153	-0.891327	-7.80008	-5.38065	1.45682	2.43708	-3.5887	4.05752	1.48776	1.2595	5.18616	0.917947
18-dimensional	276.095	-22.4743	33.6999	11.4665	12.8358	6.81437	-57.1163	55.7681	61.7574	-3.37918	-75.3954	-30.3965	96.9948	-112.006	-71.4756	3.71164	-43.5946	-23.1197
2	-22.4743	297.788	31.2418	39.2676	-67.4141	59.9201	87.6172	49.9933	-81.2717	-39.1151	9.23774	-100.092	-26.7056	-33.7299	-1.72484	14.9154	-1.30085	-3.51237
3	33.6999	31.2418	215.677	-71.992	-50.8383	-18.3994	-12.3064	29.9398	-66.8658	26.2721	-12.659	65.3289	57.2848	-10.0775	-29.8531	7.17088	-13.2101	-7.50324
4	11.4665	39.2676	-71.992	216.918	-12.0394	98.9857	-6.60682	-59.4863	-37.4141	-82.6613	6.8718	-108.665	-181.546	49.0802	-23.3822	-14.7537	-0.21465	2.20855
5	12.8358	-67.4141	-50.8383	-12.0394	340.692	-231.408	-3.50938	-25.4147	121.233	-57.1951	48.9949	-79.0636	-64.7223	51.805	4.36258	0.376519	11.3033	5.91251
6	6.81437	59.9201	-18.3994	98.9857	-231.408	349.809	30.0029	-26.6934	-100.141	-31.7976	17.1209	-22.5599	-11.0559	-51.0991	-45.5848	-5.19422	-15.0967	-9.75666
7	-57.1163	87.6172	-12.3064	-6.60682	-3.50938	30.0029	343.347	11.7835	90.5802	-28.4648	-39.1457	-19.3382	5.33666	-51.2384	-37.291	7.52832	-9.50851	-9.26408
8	55.7681	49.9933	29.9398	-59.4863	-25.4147	-26.6934	11.7835	115.096	-24.3682	11.9591	-46.0462	-4.16233	-3.35831	-58.0047	-8.5333	28.7887	-9.57278	-9.85653
9	61.7574	-81.2717	-66.8658	-37.4141	121.233	-100.141	90.5802	-24.3682	283.364	-20.6595	36.3591	-47.0471	133.473	-2.03977	-4.9207	-9.82729	-5.51807	-0.855644
10	-3.37918	-39.1151	26.2721	-82.6613	-57.1951	-31.7976	-28.4648	11.9591	-20.6595	152.557	-44.0986	127.824	8.89152	-28.0787	26.1297	6.85117	-8.99415	-1.59051
11	-75.3954	9.23774	-12.659	6.8718	48.9949	17.1209	-39.1457	-46.0462	36.3591	-44.0986	206.707	-92.2729	-54.3314	67.1944	11.1309	9.69218	14.613	6.51117
12	-30.3965	-100.092	65.3289	-108.665	-79.0636	-22.5599	-19.3382	-4.16233	-47.0471	127.824	-92.2729	245.307	65.7194	-64.4006	-23.007	1.74174	-14.9429	-8.86433
13	96.9948	-26.7056	57.2848	-181.546	-64.7223	-11.0559	5.33666	-3.35831	133.473	8.89152	-54.3314	65.7194	530.648	-100.963	28.0797	-40.116	0.928508	3.41344
14	-112.006	-33.7299	-10.0775	49.0802	51.805	-51.0991	-51.2384	-58.0047	-2.03977	-28.0787	67.1944	-64.4006	-100.963	180.602	70.1229	-21.4893	33.1274	25.586
15	-71.4756	-1.72484	-29.8531	-23.3822	4.36258	-45.5848	-37.291	-8.5333	-4.9207	26.1297	11.1309	-23.007	28.0797	70.1229	92.93	-14.9084	27.3808	21.0655
16	3.71164	14.9154	7.17088	-14.7537	0.376519	-5.19422	7.52832	28.7887	-9.82729	6.85117	9.69218	1.74174	-40.116	-21.4893	-14.9084	18.5299	-2.94651	-5.52469
17	-43.5946	-1.30085	-13.2101	-0.21465	11.3033	-15.0967	-9.50851	-9.57278	-5.51807	-8.99415	14.613	-14.9429	0.928508	33.1274	27.3808	-2.94651	15.602	8.45429
18	-23.1197	-3.51237	-7.50324	2.20855	5.91251	-9.75666	-9.26408	-9.85653	-0.855644	-1.59051	6.51117	-8.86433	3.41344	25.586	21.0655	-5.52469	8.45429	6.04717
19-dimensional	194.008	-77.7676	70.005	24.6869	-108.437	54.5836	56.7356	59.179	-97.6316	-0.246591	24.8865	-70.9155	-22.9936	-57.2786	7.18541	-26.2597	31.6164	0.738104	-1.94031
2	-77.7676	295.912	28.2815	16.233	72.5407	-140.806	29.5036	5.09956	-5.9931	-58.2806	81.5202	68.2205	26.9912	-10.089	60.0894	15.1263	-17.6833	8.04617	6.64335
3	70.005	28.2815	661.947	-26.435	178.462	-71.8072	-80.6933	-56.3826	65.4241	21.5694	5.06169	125.858	50.361	128.51	-118.553	49.3266	-29.846	42.9985	1.37216
4	24.6869	16.233	-26.435	340.114	51.6029	141.396	20.0476	-70.9698	17.2514	13.4413	-8.21347	-36.2425	36.7541	-38.9025	147.581	34.3334	-56.4518	10.3194	14.9019
5	-108.437	72.5407	178.462	51.6029	472.556	-136.952	-66.2361	74.81	102.039	35.1331	-79.7061	61.7514	19.5032	51.0737	-9.50445	39.3907	-29.471	44.1435	8.06676
6	54.5836	-140.806	-71.8072	141.396	-136.952	800.411	-13.2414	41.5832	3.00564	-31.1713	95.6689	-106.875	-48.999	-31.5022	26.513	-29.5733	24.1872	-17.5285	1.41649
7	56.7356	29.5036	-80.6933	20.0476	-66.2361	-13.2414	418.296	49.5885	-69.4496	27.6766	37.4205	-81.406	-15.0634	-47.2688	-8.96529	-10.9606	40.1473	7.13889	-5.58256
8	59.179	5.09956	-56.3826	-70.9698	74.81	41.5832	49.5885	457.269	-16.6337	-9.95665	-87.4957	20.1614	4.48772	19.9877	-12.2213	-16.1978	-8.35649	-13.9799	-1.83669
9	-97.6316	-5.9931	65.4241	17.2514	102.039	3.00564	-69.4496	-16.6337	290.507	26.5476	-88.8328	15.6772	30.3842	45.6373	-8.04118	17.8264	-35.1685	2.72794	3.57514
10	-0.246591	-58.2806	21.5694	13.4413	35.1331	-31.1713	27.6766	-9.95665	26.5476	61.3119	-66.9649	-6.55802	-1.28912	16.3575	-35.4279	11.2843	-2.1382	10.8813	-1.27513
11	24.8865	81.5202	5.06169	-8.21347	-79.7061	95.6689	37.4205	-87.4957	-88.8328	-66.9649	316.949	-89.3151	-40.2076	-57.8351	50.4919	-6.21613	43.3312	3.67342	3.15082
12	-70.9155	68.2205	125.858	-36.2425	61.7514	-106.875	-81.406	20.1614	15.6772	-6.55802	-89.3151	168.841	49.4577	93.4867	-67.3607	26.3913	-27.4589	6.21951	-2.60773
13	-22.9936	26.9912	50.361	36.7541	19.5032	-48.999	-15.0634	4.48772	30.3842	-1.28912	-40.2076	49.4577	56.3533	13.5422	19.1369	15.4334	-35.2771	1.08835	2.2433
14	-57.2786	-10.089	128.51	-38.9025	51.0737	-31.5022	-47.2688	19.9877	45.6373	16.3575	-57.8351	93.4867	13.5422	151.089	-102.269	25.6246	-24.0616	2.97364	-3.03491
15	7.18541	60.0894	-118.553	147.581	-9.50445	26.513	-8.96529	-12.2213	-8.04118	-35.4279	50.4919	-67.3607	19.1369	-102.269	211.538	8.10972	-47.6272	-18.5028	14.0585
16	-26.2597	15.1263	49.3266	34.3334	39.3907	-29.5733	-10.9606	-16.1978	17.8264	11.2843	-6.21613	26.3913	15.4334	25.6246	8.10972	21.1599	-20.2457	6.51666	2.79156
17	31.6164	-17.6833	-29.846	-56.4518	-29.471	24.1872	40.1473	-8.35649	-35.1685	-2.1382	43.3312	-27.4589	-35.2771	-24.0616	-47.6272	-20.2457	50.8332	5.73251	-5.70622
18	0.738104	8.04617	42.9985	10.3194	44.1435	-17.5285	7.13889	-13.9799	2.72794	10.8813	3.67342	6.21951	1.08835	2.97364	-18.5028	6.51666	5.73251	16.0742	0.514434
19	-1.94031	6.64335	1.37216	14.9019	8.06676	1.41649	-5.58256	-1.83669	3.57514	-1.27513	3.15082	-2.60773	2.2433	-3.03491	14.0585	2.79156	-5.70622	0.514434	1.53597
20-dimensional	397.244	-166.563	199.369	-31.6884	-148.095	-104.704	-122.931	-43.55	-150.941	73.6546	-100.355	64.6465	-111.442	34.4091	46.1604	-30.9642	2.40945	-46.2392	-92.3249	-0.983206
2	-166.563	982.031	-40.0211	186.143	125.406	-79.4023	258.289	34.1423	-3.74733	-28.9728	80.6515	74.3976	93.2837	-90.9546	25.9769	18.0782	4.94495	28.6925	3.66574	-10.1851
3	199.369	-40.0211	508.089	-9.59738	-166.864	-91.2754	32.1803	9.32329	-140.484	202.312	-44.3617	-18.0355	13.9833	47.7936	53.6758	-11.0267	35.0586	-82.7015	-72.5807	4.81135
4	-31.6884	186.143	-9.59738	482.164	46.4391	66.1006	121.312	53.6893	90.0053	51.1735	142.166	11.8956	142.344	-95.1382	-87.3252	-56.6823	47.0511	-112.196	-100.403	8.96208
5	-148.095	125.406	-166.864	46.4391	389.716	39.3885	-23.7832	-27.6529	162.686	-239.708	6.76412	-1.16005	66.7195	-108.932	-49.5816	-28.1111	-46.9334	145.303	100.585	-13.678
6	-104.704	-79.4023	-91.2754	66.1006	39.3885	661.955	135.182	72.7652	28.8763	-108.935	111.371	-90.0933	165.721	-63.2281	-53.8837	3.57827	2.25581	3.08033	37.6362	5.1319
7	-122.931	258.289	32.1803	121.312	-23.7832	135.182	576.679	44.3815	-4.0376	-12.3442	5.06761	21.6007	53.4707	-17.3946	-5.97142	-7.80604	16.3754	-54.9425	-52.2703	3.99847
8	-43.55	34.1423	9.32329	53.6893	-27.6529	72.7652	44.3815	236.204	-20.206	-155.276	-21.0599	-10.7995	136.457	-64.8727	-1.71775	62.9065	17.6203	-53.0601	2.59567	8.72317
9	-150.941	-3.74733	-140.484	90.0053	162.686	28.8763	-4.0376	-20.206	362.666	-167.832	94.8147	1.62833	1.94138	-20.015	-112.639	-5.50981	-6.27553	20.4563	46.9398	4.05619
10	73.6546	-28.9728	202.312	51.1735	-239.708	-108.935	-12.3442	-155.276	-167.832	628.003	67.101	15.3219	-43.5208	84.1068	41.0804	-37.0877	47.4532	-93.4817	-82.9265	5.26713
11	-100.355	80.6515	-44.3617	142.166	6.76412	111.371	5.06761	-21.0599	94.8147	67.101	206.753	3.48645	45.3575	1.86078	-86.516	18.0195	5.89492	-58.6941	-6.06198	14.5789
12	64.6465	74.3976	-18.0355	11.8956	-1.16005	-90.0933	21.6007	-10.7995	1.62833	15.3219	3.48645	106.147	-28.3568	26.4833	15.8635	24.7462	-6.59822	-21.4388	-20.9775	2.23699
13	-111.442	93.2837	13.9833	142.344	66.7195	165.721	53.4707	136.457	1.94138	-43.5208	45.3575	-28.3568	291.575	-106.296	56.1003	54.5648	-14.5981	-1.54516	11.3316	2.38231
14	34.4091	-90.9546	47.7936	-95.1382	-108.932	-63.2281	-17.3946	-64.8727	-20.015	84.1068	1.86078	26.4833	-106.296	163.494	18.6064	64.4648	-9.8561	-45.3282	-21.2567	7.61279
15	46.1604	25.9769	53.6758	-87.3252	-49.5816	-53.8837	-5.97142	-1.71775	-112.639	41.0804	-86.516	15.8635	56.1003	18.6064	168.558	49.3348	-24.1416	38.0829	-5.71425	-10.7188
16	-30.9642	18.0782	-11.0267	-56.6823	-28.1111	3.57827	-7.80604	62.9065	-5.50981	-37.0877	18.0195	24.7462	54.5648	64.4648	49.3348	131.997	-44.0988	-10.4324	16.4499	7.4148
17	2.40945	4.94495	35.0586	47.0511	-46.9334	2.25581	16.3754	17.6203	-6.27553	47.4532	5.89492	-6.59822	-14.5981	-9.8561	-24.1416	-44.0988	48.6022	-40.4297	-20.5191	0.7156
18	-46.2392	28.6925	-82.7015	-112.196	145.303	3.08033	-54.9425	-53.0601	20.4563	-93.4817	-58.6941	-21.4388	-1.54516	-45.3282	38.0829	-10.4324	-40.4297	135.729	83.3325	-16.4912
19	-92.3249	3.66574	-72.5807	-100.403	100.585	37.6362	-52.2703	2.59567	46.9398	-82.9265	-6.06198	-20.9775	11.3316	-21.2567	-5.71425	16.4499	-20.5191	83.3325	89.7051	-5.47834
20	-0.983206	-10.1851	4.81135	8.96208	-13.678	5.1319	3.99847	8.72317	4.05619	5.26713	14.5789	2.23699	2.38231	7.61279	-10.7188	7.4148	0.7156	-16.4912	-5.47834	3.39536
21-dimensional	387.31	247.88	244.806	-25.1832	-12.1192	102.576	14.3837	-0.0195541	109.816	86.8341	54.7496	-121.257	21.0193	-8.02087	32.6777	-31.1664	44.2059	5.34764	63.798	-47.9814	43.4891
2	247.88	579.763	262.184	51.1825	45.7482	87.6734	-17.3313	-94.5108	152.418	-117.68	-40.8597	-39.9126	-11.9307	-61.2772	9.9685	-51.4831	6.67294	-48.844	31.894	-10.0683	10.6162
3	244.806	262.184	896.849	20.8718	60.8933	29.7389	116.099	-30.893	-188.435	-68.613	73.7098	60.414	50.4466	28.2417	52.6954	-18.5529	75.2687	5.48797	76.3324	-64.7291	53.1397
4	-25.1832	51.1825	20.8718	676.667	262.965	-299.089	-160.215	-170.691	146.499	-280.277	30.2535	-181.168	-54.8315	84.9839	-64.0146	26.7264	-61.7027	-82.6006	-19.0059	25.3587	-26.1705
5	-12.1192	45.7482	60.8933	262.965	399.021	-139.608	158.461	-82.7018	113.781	-93.568	44.234	-49.7913	17.1797	97.8668	-1.45558	-2.60495	20.3323	-59.1199	24.6095	-6.4946	6.13993
6	102.576	87.6734	29.7389	-299.089	-139.608	826.874	298.231	-61.0481	94.9091	82.2492	27.7223	138.226	-40.2862	-33.0223	10.9431	-21.8118	-52.009	-52.7914	31.6298	-18.4356	23.587
7	14.3837	-17.3313	116.099	-160.215	158.461	298.231	500.637	6.24469	-109.531	155.984	27.325	148.959	-19.1532	78.55	27.8416	-0.0453625	66.8029	-37.0365	53.0373	-24.489	24.3049
8	-0.0195541	-94.5108	-30.893	-170.691	-82.7018	-61.0481	6.24469	566.506	-130.049	16.085	31.1373	181.469	60.6194	-38.4002	32.4386	-37.9237	29.3884	39.4003	9.41144	-16.3414	16.9364
9	109.816	152.418	-188.435	146.499	113.781	94.9091	-109.531	-130.049	677.441	18.2945	31.5321	-131.154	45.3938	-32.0988	-31.1924	6.99021	-27.8287	-10.403	-20.2987	28.0215	-23.3496
10	86.8341	-117.68	-68.613	-280.277	-93.568	82.2492	155.984	16.085	18.2945	563.049	43.9747	42.6734	-21.4215	-28.7006	14.5577	85.8705	93.9774	92.9486	0.984812	0.827685	-8.91689
11	54.7496	-40.8597	73.7098	30.2535	44.234	27.7223	27.325	31.1373	31.5321	43.9747	561.349	-147.102	13.9711	-85.1605	98.6107	-25.4299	130.816	73.6901	65.8858	-62.0147	51.39
12	-121.257	-39.9126	60.414	-181.168	-49.7913	138.226	148.959	181.469	-131.154	42.6734	-147.102	323.334	97.2303	27.5457	-4.59249	-1.66614	-39.6759	20.0663	-24.8053	10.2751	-6.30311
13	21.0193	-11.9307	50.4466	-54.8315	17.1797	-40.2862	-19.1532	60.6194	45.3938	-21.4215	13.9711	97.2303	211.153	48.7729	12.973	-16.0855	-5.65854	47.8475	7.15203	-20.7643	21.8781
14	-8.02087	-61.2772	28.2417	84.9839	97.8668	-33.0223	78.55	-38.4002	-32.0988	-28.7006	-85.1605	27.5457	48.7729	207.001	-35.0167	40.7892	-31.3745	-24.9137	-27.9652	20.9254	-22.757
15	32.6777	9.9685	52.6954	-64.0146	-1.45558	10.9431	27.8416	32.4386	-31.1924	14.5577	98.6107	-4.59249	12.973	-35.0167	69.0039	-14.987	67.2312	28.3492	41.0292	-34.5295	30.0832
16	-31.1664	-51.4831	-18.5529	26.7264	-2.60495	-21.8118	-0.0453625	-37.9237	6.99021	85.8705	-25.4299	-1.66614	-16.0855	40.7892	-14.987	65.6498	2.75053	0.476018	-11.249	18.1497	-19.2318
17	44.2059	6.67294	75.2687	-61.7027	20.3323	-52.009	66.8029	29.3884	-27.8287	93.9774	130.816	-39.6759	-5.65854	-31.3745	67.2312	2.75053	162.895	30.4253	85.4155	-50.3423	36.2619
18	5.34764	-48.844	5.48797	-82.6006	-59.1199	-52.7914	-37.0365	39.4003	-10.403	92.9486	73.6901	20.0663	47.8475	-24.9137	28.3492	0.476018	30.4253	70.5268	-11.2381	-9.91583	6.79942
19	63.798	31.894	76.3324	-19.0059	24.6095	31.6298	53.0373	9.41144	-20.2987	0.984812	65.8858	-24.8053	7.15203	-27.9652	41.0292	-11.249	85.4155	-11.2381	82.5414	-45.7908	38.9576
20	-47.9814	-10.0683	-64.7291	25.3587	-6.4946	-18.4356	-24.489	-16.3414	28.0215	0.827685	-62.0147	10.2751	-20.7643	20.9254	-34.5295	18.1497	-50.3423	-9.91583	-45.7908	34.4882	-29.7507
21	43.4891	10.6162	53.1397	-26.1705	6.13993	23.587	24.3049	16.9364	-23.3496	-8.91689	51.39	-6.30311	21.8781	-22.757	30.0832	-19.2318	36.2619	6.79942	38.9576	-29.7507	27.1272
22-dimensional	655.081	430.664	-150.969	123.762	243.015	-90.9768	82.2112	-56.485	46.0964	-88.1251	113.267	0.698349	255.847	-157.688	-221.61	-152.378	97.6056	20.798	18.4162	-56.2966	116.77	45.9826
2	430.664	1086.97	11.5286	187.66	175.275	89.7617	197.337	-19.2366	5.70216	-67.5241	205.984	175.885	52.0748	-28.7813	-99.2067	352.877	11.266	-17.5389	-104.596	25.3634	-220.223	-42.6597
3	-150.969	11.5286	800.496	-63.9146	-315.762	3.42448	-2.88524	13.2751	92.5489	90.9368	-130.24	86.9385	-57.3685	125.452	80.8847	117.063	-40.8331	2.61368	-43.134	52.4615	-173.366	-50.3248
4	123.762	187.66	-63.9146	388.473	270.199	6.75011	78.1176	-24.8479	36.3399	-42.9205	-44.0432	57.368	-2.90285	-38.7675	96.0339	5.5063	-39.4233	72.5436	41.2585	28.8148	1.1549	-10.809
5	243.015	175.275	-315.762	270.199	1453.12	-77.2206	-172.357	-80.3666	292.993	-32.2	-108.836	86.7632	183.516	178.616	-193.706	-118.388	-34.8277	-54.9201	-95.1097	72.4574	-247.925	-72.2139
6	-90.9768	89.7617	3.42448	6.75011	-77.2206	219.536	-84.2613	13.7073	-99.5472	-55.8945	26.8281	-4.4683	-49.16	38.4446	159.464	132.362	-41.5422	14.6818	-83.9781	34.0534	-54.2124	-13.3241
7	82.2112	197.337	-2.88524	78.1176	-172.357	-84.2613	927.909	43.4669	-17.5643	-137.069	205.443	21.1181	-112.264	-43.6226	-152.072	-54.5441	-50.9599	168.561	124.06	-17.5817	147.313	48.6472
8	-56.485	-19.2366	13.2751	-24.8479	-80.3666	13.7073	43.4669	85.4129	-61.1177	-36.253	33.1358	-46.2692	-111.233	-50.5931	-31.4527	-4.8797	33.3613	0.334112	-36.6392	-25.9502	55.6548	26.4731
9	46.0964	5.70216	92.5489	36.3399	292.993	-99.5472	-17.5643	-61.1177	663.533	-32.5956	-55.5748	-101.759	111.774	30.1423	-135.727	70.4962	-41.9966	-61.2288	-3.56957	50.4146	-225.847	-66.9391
10	-88.1251	-67.5241	90.9368	-42.9205	-32.2	-55.8945	-137.069	-36.253	-32.5956	300.851	-81.3592	14.0525	112.136	21.4657	1.22919	63.1808	66.0754	-168.471	-54.2052	-8.04675	-116.294	-31.64
11	113.267	205.984	-130.24	-44.0432	-108.836	26.8281	205.443	33.1358	-55.5748	-81.3592	370.743	-24.6134	-34.58	-61.1342	-244.84	68.5226	0.35794	43.2371	-14.5372	-3.79277	88.5118	48.6731
12	0.698349	175.885	86.9385	57.368	86.7632	-4.4683	21.1181	-46.2692	-101.759	14.0525	-24.6134	548.609	-46.3021	201.396	4.45115	147.817	-92.6708	65.5149	-66.469	48.3189	-192.365	-50.6488
13	255.847	52.0748	-57.3685	-2.90285	183.516	-49.16	-112.264	-111.233	111.774	112.136	-34.58	-46.3021	351.183	-36.7778	-74.5717	-66.5668	68.2344	-121.396	-7.2139	-18.358	-54.3212	-14.3367
14	-157.688	-28.7813	125.452	-38.7675	178.616	38.4446	-43.6226	-50.5931	30.1423	21.4657	-61.1342	201.396	-36.7778	370.278	-4.22208	129.724	-160.409	19.0454	-56.017	79.6444	-238.535	-69.2428
15	-221.61	-99.2067	80.8847	96.0339	-193.706	159.464	-152.072	-31.4527	-135.727	1.22919	-244.84	4.45115	-74.5717	-4.22208	664.454	44.3306	-54.2201	125.311	46.5973	95.0117	99.0046	-15.7349
16	-152.378	352.877	117.063	5.5063	-118.388	132.362	-54.5441	-4.8797	70.4962	63.1808	68.5226	147.817	-66.5668	129.724	44.3306	531.442	-17.4655	-61.0307	-201.622	71.6468	-364.33	-86.2764
17	97.6056	11.266	-40.8331	-39.4233	-34.8277	-41.5422	-50.9599	33.3613	-41.9966	66.0754	0.35794	-92.6708	68.2344	-160.409	-54.2201	-17.4655	167.24	-103.574	-73.2704	-49.9653	56.225	27.8443
18	20.798	-17.5389	2.61368	72.5436	-54.9201	14.6818	168.561	0.334112	-61.2288	-168.471	43.2371	65.5149	-121.396	19.0454	125.311	-61.0307	-103.574	272.762	129.74	60.6238	120.71	16.499
19	18.4162	-104.596	-43.134	41.2585	-95.1097	-83.9781	124.06	-36.6392	-3.56957	-54.2052	-14.5372	-66.469	-7.2139	-56.017	46.5973	-201.622	-73.2704	129.74	262.537	-23.4138	189.878	27.787
20	-56.2966	25.3634	52.4615	28.8148	72.4574	34.0534	-17.5817	-25.9502	50.4146	-8.04675	-3.79277	48.3189	-18.358	79.6444	95.0117	71.6468	-49.9653	60.6238	-23.4138	95.187	-73.1085	-30.6912
21	116.77	-220.223	-173.366	1.1549	-247.925	-54.2124	147.313	55.6548	-225.847	-116.294	88.5118	-192.365	-54.3212	-238.535	99.0046	-364.33	56.225	120.71	189.878	-73.1085	526.374	137.216
22	45.9826	-42.6597	-50.3248	-10.809	-72.2139	-13.3241	48.6472	26.4731	-66.9391	-31.64	48.6731	-50.6488	-14.3367	-69.2428	-15.7349	-86.2764	27.8443	16.499	27.787	-30.6912	137.216	41.9308
23-dimensional	649.466	-222.053	-75.679	15.0921	-23.017	-58.6559	99.0699	-141.781	111.594	-159.702	-40.9863	-33.4159	-64.6042	-169.654	-79.2074	-14.184	4.74816	-59.6619	54.5326	77.9086	-88.5739	10.4683	93.6114
2	-222.053	906.922	-185.683	-259.404	59.9915	187.747	73.645	-128.423	-68.6635	-120.189	133.337	-118.347	-60.1492	-170.375	-34.219	48.682	-62.343	-60.2236	81.6853	50.5727	-90.393	-20.6869	40.316
3	-75.679	-185.683	808.498	-63.6741	74.5836	21.1528	-6.17974	-15.2212	-65.4019	74.5789	26.2985	83.9906	-118.17	-101.588	-50.9082	-50.3941	-64.0804	-68.1027	-104.422	-85.9345	136.336	20.4626	-88.0877
4	15.0921	-259.404	-63.6741	1214.39	-73.3729	-211.314	-181.353	-242.805	73.933	238.043	-132.778	171.524	224.456	153.783	81.3059	10.4572	199.933	62.0091	-0.074218	15.476	74.4202	3.7122	-50.4713
5	-23.017	59.9915	74.5836	-73.3729	1031.08	-106.554	-67.7823	-372.239	12.0834	-36.1428	21.144	-84.3199	-33.8259	-129.778	58.817	26.9505	-48.3314	-119.343	-29.4629	-74.7303	-7.57228	6.67826	11.8563
6	-58.6559	187.747	21.1528	-211.314	-106.554	565.622	-12.2518	2.65896	44.3609	-53.8099	79.3734	-209.991	-88.6632	-38.5629	31.3067	36.2404	-25.6696	40.7351	64.4678	-10.5782	-93.01	-17.2137	41.8397
7	99.0699	73.645	-6.17974	-181.353	-67.7823	-12.2518	366.681	54.9016	-143.92	-132.643	-12.2495	-103.424	-103.752	-69.9697	-71.0917	-23.9363	-168.664	-37.0248	43.6775	66.8469	-44.3589	-4.28787	26.6145
8	-141.781	-128.423	-15.2212	-242.805	-372.239	2.65896	54.9016	838.071	164.417	-179.709	17.9403	-54.7916	-205.843	60.4613	-49.2945	7.54712	-45.0133	47.9065	56.6505	51.6646	-105.763	-31.7354	24.7626
9	111.594	-68.6635	-65.4019	73.933	12.0834	44.3609	-143.92	164.417	932.468	-223.353	100.974	-229.169	37.7557	-45.0164	146.419	61.3315	152.072	98.4949	63.5556	-16.4205	-240.589	-23.1151	154.998
10	-159.702	-120.189	74.5789	238.043	-36.1428	-53.8099	-132.643	-179.709	-223.353	566.142	-34.371	153	150.138	144.037	96.7773	-78.2755	18.43	70.9457	-144.06	-81.9334	187.253	22.8519	-125.142
11	-40.9863	133.337	26.2985	-132.778	21.144	79.3734	-12.2495	17.9403	100.974	-34.371	440.008	-89.9368	58.1432	-7.38133	-50.938	50.8177	82.0282	83.8163	5.86496	-70.5547	-62.352	-14.0609	24.6879
12	-33.4159	-118.347	83.9906	171.524	-84.3199	-209.991	-103.424	-54.7916	-229.169	153	-89.9368	398.057	35.6631	79.9447	-111.507	-47.6609	139.541	-44.6916	-114.008	-17.9989	204.04	20.6471	-134.413
13	-64.6042	-60.1492	-118.17	224.456	-33.8259	-88.6632	-103.752	-205.843	37.7557	150.138	58.1432	35.6631	557.268	246.381	11.3467	18.5513	319.066	79.732	-89.9525	-77.4095	95.4729	17.4726	-48.3359
14	-169.654	-170.375	-101.588	153.783	-129.778	-38.5629	-69.9697	60.4613	-45.0164	144.037	-7.38133	79.9447	246.381	361.032	55.8627	11.1937	126.526	54.4167	-54.2727	-31.3739	83.2519	6.70548	-44.8767
15	-79.2074	-34.219	-50.9082	81.3059	58.817	31.3067	-71.0917	-49.2945	146.419	96.7773	-50.938	-111.507	11.3467	55.8627	367.78	-5.27594	-139.099	19.586	15.9236	-26.9804	-72.0217	3.30016	67.2617
16	-14.184	48.682	-50.3941	10.4572	26.9505	36.2404	-23.9363	7.54712	61.3315	-78.2755	50.8177	-47.6609	18.5513	11.1937	-5.27594	84.055	57.7214	-23.1483	40.5307	-5.00568	-25.7547	-9.41714	19.9257
17	4.74816	-62.343	-64.0804	199.933	-48.3314	-25.6696	-168.664	-45.0133	152.072	18.43	82.0282	139.541	319.066	126.526	-139.099	57.7214	489.749	34.9917	-74.0283	-84.866	77.3399	2.15412	-67.8678
18	-59.6619	-60.2236	-68.1027	62.0091	-119.343	40.7351	-37.0248	47.9065	98.4949	70.9457	83.8163	-44.6916	79.732	54.4167	19.586	-23.1483	34.9917	196.744	8.64202	-16.6456	-30.5631	-2.56471	12.8291
19	54.5326	81.6853	-104.422	-0.074218	-29.4629	64.4678	43.6775	56.6505	63.5556	-144.06	5.86496	-114.008	-89.9525	-54.2727	15.9236	40.5307	-74.0283	8.64202	126.741	70.1271	-113.186	-13.3884	73.9768
20	77.9086	50.5727	-85.9345	15.476	-74.7303	-10.5782	66.8469	51.6646	-16.4205	-81.9334	-70.5547	-17.9989	-77.4095	-31.3739	-26.9804	-5.00568	-84.866	-16.6456	70.1271	87.1891	-51.665	-7.59703	31.3738
21	-88.5739	-90.393	136.336	74.4202	-7.57228	-93.01	-44.3589	-105.763	-240.589	187.253	-62.352	204.04	95.4729	83.2519	-72.0217	-25.7547	77.3399	-30.5631	-113.186	-51.665	189.029	20.4849	-114.998
22	10.4683	-20.6869	20.4626	3.7122	6.67826	-17.2137	-4.28787	-31.7354	-23.1151	22.8519	-14.0609	20.6471	17.4726	6.70548	3.30016	-9.41714	2.15412	-2.56471	-13.3884	-7.59703	20.4849	5.78577	-7.29396
23	93.6114	40.316	-88.0877	-50.4713	11.8563	41.8397	26.6145	24.7626	154.998	-125.142	24.6879	-134.413	-48.3359	-44.8767	67.2617	19.9257	-67.8678	12.8291	73.9768	31.3738	-114.998	-7.29396	85.8926
24-dimensional	624.143	-87.8117	-76.3954	133.997	117.605	-15.9845	320.986	77.5644	46.4215	172.333	313.349	97.4687	-98.7044	258.556	-11.8979	-147.221	-19.9607	-70.8213	-127.933	151.266	63.2152	-40.3401	52.5746	-1.97306
2	-87.8117	1432.79	-147.776	233.988	143.586	-85.0884	-196.323	21.6153	-281.263	-39.6494	-12.2135	-145.985	134.459	68.3756	-72.0088	-54.7311	81.1145	-185.784	309.124	98.1673	68.0571	89.9431	-39.8437	9.63864
3	-76.3954	-147.776	600.292	-107.164	-160.204	180.554	57.3554	-12.7666	-16.3036	-8.07404	14.0991	40.2524	-5.85374	-225.149	-134.681	113.724	-1.03131	53.012	68.974	111.921	70.9768	-11.5704	-52.2756	1.08244
4	133.997	233.988	-107.164	652.24	-103.268	-367.364	-483.463	-63.1278	-178.203	97.2064	-28.6588	-45.0814	161.094	196.014	148.774	-88.9751	19.5083	-335.321	56.3053	333.056	227.58	73.5251	-96.9478	9.75917
5	117.605	143.586	-160.204	-103.268	1505.84	273.181	-44.8079	182.036	233.359	75.9781	131.694	137.051	101.151	18.4371	132.95	-289.734	74.9014	34.974	32.6227	-221.09	-159.774	-89.6179	9.86089	-5.35105
6	-15.9845	-85.0884	180.554	-367.364	273.181	1420.27	18.1179	-121.269	62.6671	34.7881	-60.5582	-138.401	115.163	-178.625	71.9337	-174.164	89.996	233.595	145.176	-165.537	-63.8825	-77.1035	6.28664	-3.2839
7	320.986	-196.323	57.3554	-483.463	-44.8079	18.1179	1543.82	-102.756	72.3559	218.948	435.459	169.285	-224.213	13.7242	54.5169	-13.5947	-51.1623	551.995	-220.533	-133.645	-103.606	-169.891	118.523	-15.9658
8	77.5644	21.6153	-12.7666	-63.1278	182.036	-121.269	-102.756	500.082	-123.175	-115.62	-57.0795	274.07	-170.826	88.0554	-267.108	16.5623	-11.6542	-163.882	-51.3917	-143.524	-58.7436	47.7013	-41.0857	1.72971
9	46.4215	-281.263	-16.3036	-178.203	233.359	62.6671	72.3559	-123.175	1155.02	186.878	263.156	-92.5403	13.9734	-54.3509	-26.7967	-141.609	48.7099	309.404	-247.9	-220.585	0.347641	-123.636	83.1461	-7.83232
10	172.333	-39.6494	-8.07404	97.2064	75.9781	34.7881	218.948	-115.62	186.878	455.154	127.069	29.1155	-31.2834	131.247	207.746	-157.221	77.2137	180.456	-117.214	-1.47273	48.6915	-126.999	79.9179	-5.73615
11	313.349	-12.2135	14.0991	-28.6588	131.694	-60.5582	435.459	-57.0795	263.156	127.069	706.077	-5.66262	-92.0587	147.587	-1.61469	-92.8943	-16.8053	153.374	-73.9961	24.5473	18.3784	-28.5272	47.6142	-2.81211
12	97.4687	-145.985	40.2524	-45.0814	137.051	-138.401	169.285	274.07	-92.5403	29.1155	-5.66262	642.613	-101.838	44.6762	95.2822	94.1084	29.2151	31.4884	-148.024	-43.7886	-43.8322	-71.8737	35.5272	-4.56294
13	-98.7044	134.459	-5.85374	161.094	101.151	115.163	-224.213	-170.826	13.9734	-31.2834	-92.0587	-101.838	342.646	-234.562	104.793	-128.834	61.6641	11.9385	181.645	112.657	68.7613	3.77576	-19.2348	3.06597
14	258.556	68.3756	-225.149	196.014	18.4371	-178.625	13.7242	88.0554	-54.3509	131.247	147.587	44.6762	-234.562	1004.39	153.676	-114.8	2.7272	-301.528	114.684	57.0438	-133.717	25.6257	26.0107	1.81963
15	-11.8979	-72.0088	-134.681	148.774	132.95	71.9337	54.5169	-267.108	-26.7967	207.746	-1.61469	95.2822	104.793	153.676	797.018	-140.518	-23.8182	51.1699	6.53059	57.3587	-81.1054	-84.4336	30.7814	-5.53787
16	-147.221	-54.7311	113.724	-88.9751	-289.734	-174.164	-13.5947	16.5623	-141.609	-157.221	-92.8943	94.1084	-128.834	-114.8	-140.518	616.8	-54.0603	-220.034	-188.194	77.613	69.1012	52.0737	-23.1276	3.27729
17	-19.9607	81.1145	-1.03131	19.5083	74.9014	89.996	-51.1623	-11.6542	48.7099	77.2137	-16.8053	29.2151	61.6641	2.7272	-23.8182	-54.0603	162.814	41.3793	28.5706	-90.9325	-0.31318	-53.8535	30.8784	-0.631885
18	-70.8213	-185.784	53.012	-335.321	34.974	233.595	551.995	-163.882	309.404	180.456	153.374	31.4884	11.9385	-301.528	51.1699	-220.034	41.3793	727.217	-131.774	-342.514	-72.1008	-164.135	106.937	-13.4689
19	-127.933	309.124	68.974	56.3053	32.6227	145.176	-220.533	-51.3917	-247.9	-117.214	-73.9961	-148.024	181.645	114.684	6.53059	-188.194	28.5706	-131.774	528.301	183.41	-58.9138	94.2184	-10.2741	7.94412
20	151.266	98.1673	111.921	333.056	-221.09	-165.537	-133.645	-143.524	-220.585	-1.47273	24.5473	-43.7886	112.657	57.0438	57.3587	77.613	-90.9325	-342.514	183.41	619.957	213.814	119.576	-75.3363	10.3612
21	63.2152	68.0571	70.9768	227.58	-159.774	-63.8825	-103.606	-58.7436	0.347641	48.6915	18.3784	-43.8322	68.7613	-133.717	-81.1054	69.1012	-0.31318	-72.1008	-58.9138	213.814	221.168	43.497	-67.7045	5.4078
22	-40.3401	89.9431	-11.5704	73.5251	-89.6179	-77.1035	-169.891	47.7013	-123.636	-126.999	-28.5272	-71.8737	3.77576	25.6257	-84.4336	52.0737	-53.8535	-164.135	94.2184	119.576	43.497	104.94	-51.2334	6.24979
23	52.5746	-39.8437	-52.2756	-96.9478	9.86089	6.28664	118.523	-41.0857	83.1461	79.9179	47.6142	35.5272	-19.2348	26.0107	30.7814	-23.1276	30.8784	106.937	-10.2741	-75.3363	-67.7045	-51.2334	90.9709	-3.65852
24	-1.97306	9.63864	1.08244	9.75917	-5.35105	-3.2839	-15.9658	1.72971	-7.83232	-5.73615	-2.81211	-4.56294	3.06597	1.81963	-5.53787	3.27729	-0.631885	-13.4689	7.94412	10.3612	5.4078	6.24979	-3.65852	0.499266
25-dimensional	698.713	139.065	-46.1549	452.066	114.496	-166.086	-57.0988	141.488	315.014	-458.728	487.099	54.3625	-95.9063	-102.036	76.2307	-21.4368	48.2135	-227.019	44.411	-60.6284	114.783	-198.055	150.14	-32.7771	-8.7547
2	139.065	1961.3	30.6633	177.834	122.025	-322.881	98.8901	89.6065	248.612	-52.115	-297.044	-351.902	122.346	-173.759	21.1773	9.60655	175.795	-186.629	229.629	5.46139	-246.006	-85.346	58.9958	133.631	-49.2997
3	-46.1549	30.6633	2199.91	-164.738	-166.763	182.107	4.4599	-71.7793	-40.0961	-64.6848	94.0935	428.052	-127.356	203.613	-31.8574	179.752	-95.0713	39.9859	-45.3589	120.55	70.8351	17.9022	-77.3221	-69.4042	24.4855
4	452.066	177.834	-164.738	2124.82	-78.6592	-329.413	434.227	69.195	187.18	-388.022	525.543	397.817	-297.528	-176.274	203.905	-11.8299	160.839	-6.28695	222.007	66.8569	285.403	-208.827	306.652	-38.3245	19.1539
5	114.496	122.025	-166.763	-78.6592	1098.91	321.406	-90.7041	37.9051	116.959	-110.411	-310.322	-202.463	276.518	170.203	-35.4257	-39.3931	-117.702	55.3145	-31.9551	21.3628	-7.10534	87.9446	-66.9626	-20.39	-1.25205
6	-166.086	-322.881	182.107	-329.413	321.406	1719.88	79.6901	81.5131	85.5365	-417.359	45.646	64.4627	613.719	240.635	-163.312	133.041	-208.765	187.736	-195.691	79.9869	51.8101	166.233	-192.194	-146.754	33.0891
7	-57.0988	98.8901	4.4599	434.227	-90.7041	79.6901	1646.99	91.1555	-41.2677	-133.994	-170.394	-64.1495	-182.044	156.785	28.2958	-55.4673	102.312	87.5939	147.988	65.5525	-9.57454	-10.3496	70.7099	49.7661	-7.83007
8	141.488	89.6065	-71.7793	69.195	37.9051	81.5131	91.1555	1142.13	172.785	-126.514	-169.521	-4.76563	20.8729	-103.194	-3.4312	151.31	69.5198	-68.1413	33.3657	42.7625	186.126	-174.699	131.129	-138.768	21.1038
9	315.014	248.612	-40.0961	187.18	116.959	85.5365	-41.2677	172.785	1404.07	-652.751	294.095	261.486	-115.007	-37.7859	-50.2327	81.5067	-3.04604	70.8463	-80.1623	0.77351	358.23	-224.665	173.752	-197.179	44.4871
10	-458.728	-52.115	-64.6848	-388.022	-110.411	-417.359	-133.994	-126.514	-652.751	992.844	-364.251	-366.041	98.4179	71.6424	-106.473	3.5018	-96.739	-22.1509	-42.472	-42.9375	-368.413	220.06	-225.3	102.029	-36.2105
11	487.099	-297.044	94.0935	525.543	-310.322	45.646	-170.394	-169.521	294.095	-364.251	1459.96	419.991	-100.534	23.3675	41.9314	-21.7975	-81.2746	94.4518	64.0161	113.467	48.3669	89.9293	-20.7163	-5.9846	5.32101
12	54.3625	-351.902	428.052	397.817	-202.463	64.4627	-64.1495	-4.76563	261.486	-366.041	419.991	1136.94	-337.942	276.623	-24.9234	174.801	-61.7622	125.528	-127.569	71.536	235.025	-37.2618	1.86409	-141.711	52.0887
13	-95.9063	122.346	-127.356	-297.528	276.518	613.719	-182.044	20.8729	-115.007	98.4179	-100.534	-337.942	743.777	102.453	-155.541	96.4883	-9.75751	-6.86859	-17.9983	23.4976	-133.851	-30.9633	-92.2127	11.1531	-12.4387
14	-102.036	-173.759	203.613	-176.274	170.203	240.635	156.785	-103.194	-37.7859	71.6424	23.3675	276.623	102.453	674.78	-178.768	95.0746	-195.309	115.007	-219.147	31.337	49.9193	65.0602	-169.976	-104.594	24.3014
15	76.2307	21.1773	-31.8574	203.905	-35.4257	-163.312	28.2958	-3.4312	-50.2327	-106.473	41.9314	-24.9234	-155.541	-178.768	193.535	-32.0725	36.6043	-56.0751	174.344	79.1706	96.9189	-21.6136	123.779	26.0895	-0.496824
[truncated: 505 more rows]
[truncated: 31 more columns]
