# Supplementary material for: Improved GNSS integer ambiguity resolution method based on the column oriented Cholesky decomposition
Source: Research Square preprint supplement (doi:10.21203/rs.3.rs-2360038/v1), 2022-12-20
Supplement: Supplementary file 7 [file Simulation solution time.xlsx]

## Sheet: Sheet1
	1-1-LDL	1-1-MLDL	1-2-LDL	1-2-MLDL	1-3-LDL	1-3-MLDL	1-4-LDL	1-4-MLDL	1-5-LDL	1-5-MLDL	1-6-LDL	1-6-MLDL	1-7-LDL	1-7-MLDL
5 dimension	5967.61	5083.73	5710.94	4880.66	5595.65	5030.85	5727.55	4886.86	6368.42	3880.54	6703.57	5520.16	5114.5	4585.4
6 dimension	6773.44	6460.2	7256.61	6113.85	8555.28	5933.62	7550.42	4681.16	7049.98	4547.78	7284.85	6575.19	6675.8	5294.07
7 dimension	7569.7	7283.29	8791.84	7510.91	7910.02	6988.71	10446.7	6777.64	9038.31	6156.94	9774.2	7509.62	8717.5	6232.36
8 dimension	8342.44	7981.82	9118.79	7629.16	10049.4	7729.86	12104.7	7911.58	10984.2	7073.68	10195.1	8303.48	12105	6436.29
9 dimension	10215	8489.61	10262.5	8150.19	10433.5	9152.33	12080.4	8277.6	10083.8	8582.72	11611.8	9469.81	13306.1	7955.06
10 dimension	13870.7	9350.33	12289.4	9240.92	12815.9	11384.7	13689.4	9251.69	15741.6	9792.64	13594.1	11402.3	15721.3	9139.45
11 dimension	15263.9	10969.7	13492	11812.6	16396.4	13283.7	14578.1	10959.4	15891	11152.8	14239.9	12536.4	17079.7	11483.7
12 dimension	18329.8	13779.8	15890.2	13120.1	17962	14129.9	19798.2	12501.7	19452.4	12380.6	18941.2	14796	18953.8	13939.3
13 dimension	21419.1	18584.3	19298.6	17801.8	22701.1	18908.2	26712.4	17458.1	22201	16754.4	21755.3	18542.5	20272.9	17388
14 dimension	29496.1	25678.5	31012.5	24280.6	30905.4	23002.3	30968.3	21727	24243.1	20775.7	27648.3	23057.4	25017.6	21452.8
15 dimension	35636.3	27277	35643.2	26562.2	32812.1	27008	34768	27066.4	26191.8	24470.7	28401.3	25359.4	33992.1	23090.9
16 dimension	33415.5	31489.3	37479.7	28883.8	35449	31501.1	39103.6	29530.7	29697	24462.5	32786.1	28527.1	39381.7	25028.3
17 dimension	34157.8	29451.4	38013.2	31070	40918	28845.4	41199.1	32335.7	31975.7	27090.7	35148.7	29738.2	40287.9	30799.8
18 dimension	37294.5	33293.7	41977.5	33803.7	39986	32826.9	48930.8	34658.9	34226.6	28209	36207.8	31591.9	44817.1	33606.9
19 dimension	38149.8	36403	45696.3	36146.9	45395.2	35562.9	49709.7	36946.7	42438.7	32911	38024.6	33827.1	45525.2	35504.3
20 dimension	41169.6	39388.4	46866.6	38851.2	46092.9	38214.8	51393.9	40704.8	50147.5	39743.2	43292.7	36773.4	49349.3	35780.6
21 dimension	42333.6	40892.7	51747.1	41368	47253.2	37890.8	53157.2	43185.9	55044.1	44891	47544.2	39302.5	51191.4	40937.5
22 dimension	45502.2	43505.7	51036.5	43731.5	49766.5	41363.2	54461.8	44461.2	55627.2	45328.1	48818.3	41617.5	53213.2	44745.3
23 dimension	47092.7	45468.8	56502.5	47136.4	47958.9	43893.6	59156.1	47239.3	56126.2	47554.8	53096.3	44134.9	58203.1	47677.7
24 dimension	49662.1	48505.7	60926.4	49784.9	51234.7	46907.8	61876.3	50402.2	59191.3	47666.3	54616.2	47194.5	57868.9	50871.4
25 dimension	54092	52677.4	64493.1	51185.5	56736.1	47644.8	59289.4	52921.7	60073.8	51157.2	57395	53330.2	62624.6	50633.1
26 dimension	65572.2	60774.1	62949.4	58189.2	56501.7	51072.1	61237.8	55836.5	61743.2	55031.6	59425.8	56274	71208.8	62045.8
27 dimension	78217.8	69619.8	75848.9	63462.7	65160.8	61387.9	69515.6	65786.7	67460	61629.7	67644.9	62978.8	80459.5	67354.4
28 dimension	75315.4	73234.8	78041.2	71357.9	68666.7	65459.4	77067.3	70417.9	72768.6	64647.6	72442.8	66347.9	89269.7	72001.8
29 dimension	79389.2	75125.7	82514.3	74474.6	74305.4	71547.6	84782.6	72175.4	82811.5	66060.8	76164.1	72074.6	90157.3	74191.8
30 dimension	83804.3	79490.2	89452.5	77734.6	80257.4	74283.9	89186.7	80072.6	86337.6	72535.8	82408.5	74848.7	97850.8	78242.3
31 dimension	96948	83014.5	92402.5	84834.5	91887.6	83752.5	94170.9	79644.3	93353.2	78655.9	86114.8	77212.2	100046	81753.8
32 dimension	101353	85988.1	96613	87380.2	94632.8	87896.3	101974	84504.2	94369.2	82503.1	91721.7	81983.4	104797	84367.7
33 dimension	98168.6	87833.1	100693	89466.6	97868.8	84437.7	103596	87231	95257.6	83770.6	97790.8	84624.3	106779	87515.2
34 dimension	107312	89563.5	111436	89148.5	101053	85594.6	106174	90313.9	104216	87238.3	99752.4	88200.7	108419	88255
35 dimension	107769	93436.6	105931	95582.1	102230	86736.1	106574	92073	106261	88617.7	102905	90330.5	111122	93943.8
36 dimension	108943	98666.3	108865	98138.9	106356	90071.3	107300	96774.5	109114	93064	113235	94264.8	126440	98690
37 dimension	114262	99946.7	111327	105694	108472	96223.9	112228	100905	115742	97135.5	118614	98554.1	129487	97371.5
38 dimension	118125	103201	117925	101840	108939	101559	115227	103409	116768	100802	122206	99004.2	126769	100252
39 dimension	126642	111070	121480	106720	112989	98271.9	125566	106651	118865	105592	129163	103660	132276	104662
40 dimension	134170	117044	125012	111938	115339	104022	129340	110684	122964	109484	133435	108873	134206	109848
