# Supplementary material for: Improved GNSS integer ambiguity resolution method based on the column oriented Cholesky decomposition
Source: Research Square preprint supplement (doi:10.21203/rs.3.rs-2360038/v1), 2022-12-20
Supplement: Supplementary file 15 [file Long baseline solution time.xlsx]

## Sheet: Sheet1
25.449	16.691
20.528	15.875
18.914	15.436
16.963	15.471
22.086	15.256
16.295	16.814
15.44	15.859
22.905	15.658
30.607	16.967
16.552	15.048
15.903	15.691
16.754	15.492
19.77	15.941
17.769	16.284
15.694	15.77
19.479	15.06
15.511	16.233
21.991	16.047
15.733	17.323
34.836	15.231
35.419	16.047
15.931	15.296
16.913	15.346
19.427	16.897
17.119	15.568
16.533	15.135
15.47	15.648
22.8	16.683
16.321	15.941
16.492	16.988
16.899	15.233
20.29	16.707
17.65	15.181
16.53	16.32
17.604	16.36
20.429	16.26
19.968	15.009
16.689	16.248
16.114	15.71
21.433	15.778
16.199	16.406
15.08	15.132
22.19	16.978
15.68	15.806
15.685	16.285
15.158	14.849
21.849	15.546
14.415	15.238
17.329	15.231
16.31	16.14
21.257	15.835
16.724	16.503
16.795	15.898
20.219	15.449
16.897	16.185
16.756	15.401
16.499	16.304
42.972	18.228
39.433	16.023
17.663	16.692
15.783	16.358
20.974	16.946
17.704	15.168
16.367	16.927
16.233	16.966
16.801	16.831
22.64	15.248
15.309	16.778
31.855	15.912
28.73	16.925
17.226	16.881
17.369	16.544
16.182	16.754
16.05	16.344
23.524	16.417
16.286	16.565
16.061	15.871
15.557	16.73
20.591	16.914
18.514	16.497
17.307	16.293
16.195	16.015
23.052	16.7
15.156	16.466
16.102	16.63
21.255	16.182
18.768	16.381
27.292	16.144
41.059	16.977
18.183	16.106
22.43	15.052
17.109	19.534
16.783	15.076
16.63	16.133
21.382	15.706
16.646	16.967
16.383	16.713
19.466	16.185
18.641	15.41
16.611	16.302
16.157	16.714
27.1	16.633
17.745	16.481
16.217	16.531
22.168	16.018
16.223	15.012
17.862	16.527
20.987	16.649
16.423	16.182
16.599	17.273
17.789	18.506
21.624	17.668
18.315	16.497
17.864	17.916
17.639	17.718
22.184	17.845
19.8	17.472
18.862	17.041
21.262	17.477
37.076	18
18.588	18.437
16.977	16.847
20.635	17.867
25.09	17.402
17.837	17.539
17.547	18.662
18.252	17.408
23.463	17.597
17.552	18.056
17.629	17.506
17.577	16.762
23.906	17.675
17.741	17.116
18.224	16.72
22.913	18.638
18.699	17.33
17.42	17.575
17.972	16.855
23.805	17.45
17.534	17.701
16.263	16.335
22.184	16.069
17.619	17.932
17.501	17.165
23.063	17.685
19.985	16.901
17.064	18.335
21.836	16.084
20.523	17.968
17.143	17.273
19.041	16.418
23.601	20.741
17.137	17.142
17.008	17.598
24.05	16.456
17.132	17.952
17.41	16.778
22.049	17.419
17.811	17.23
17.239	17.743
21.333	17.21
17.977	17.542
18.526	16.268
27.931	17.792
33.339	17.714
18.059	17.214
17.432	18.898
24.078	17.041
18.682	17.049
17.644	16.313
17.797	17.163
22.754	16.154
16.12	16.214
17.087	16.977
16.115	16.468
21.875	16.732
17.804	16.133
16.89	16.448
16.954	16.014
16.761	16.534
23.569	16.248
16.912	16.236
16.463	16.329
21.179	16.659
16.869	17.407
17.704	16.901
16.169	16.992
23.957	16.245
16.012	15.368
16.174	15.205
20.045	16.217
16.339	16.601
16.143	16.837
16.012	16.034
20.08	16.848
16.666	16.934
17.817	16.665
16.308	16.095
21.417	16.768
17.983	16.063
16.894	17.508
16.723	16.159
20.607	15.042
17.39	16.687
19.889	17.881
34.753	15.58
17.487	17.799
16.295	16.513
20.259	15.534
17.998	16.793
16.208	16.667
15.658	15.998
19.103	16.126
16.155	19.634
15.087	15.967
15.427	15.904
20.76	15.217
16.85	15.751
15.592	16.812
19.152	15.985
17.344	17.248
15.178	15.073
15.064	15.061
15.338	16.05
20.077	15.431
17.07	15.473
14.783	15.06
16.683	15.342
15.395	15.535
20.598	15.862
16.38	15.978
15.929	15.074
15.142	15.59
15.189	15.738
21.904	15.861
17.929	15.013
15.153	15.498
16.391	16.035
19.538	15.134
15.224	15.041
15.761	15.533
15.878	15.845
17.104	15.709
19.354	21.558
16.885	15.692
15.504	22.284
15.975	15.447
21.356	15.48
18.82	15.56
15.022	15.403
18.059	14.373
17.637	15.174
15.139	15.347
15.597	15.013
18.647	14.288
16.667	15.933
15.212	15.987
15.767	15.045
16.46	15.259
19.357	15.864
16.14	16.15
15.371	15.638
19.446	14.983
17.625	17.54
14.878	16.697
15.831	15.684
21.155	16.38
16.297	16.73
15.429	15.121
21.899	15.237
17.554	16.512
15.704	16.82
16.578	15.194
21.06	15.761
15.628	15.671
16.7	14.411
15.576	16.471
21.316	14.065
15.699	15.552
14.461	15.104
18.346	15.794
16.205	15.006
14.428	15.215
14.645	14.796
16.205	16.276
21.586	14.795
19.394	19.665
18.025	14.443
15.495	14.207
18.679	14.549
17.306	14.925
15.106	14.763
14.395	15.058
15.101	15.117
19.371	14.995
17.339	15.983
14.32	14.262
15.304	13.674
15.567	13.313
20.071	13.45
14.331	14.793
13.851	14.92
14.214	13.446
14.066	14.249
18.504	16.102
16.475	14.667
14.675	14.451
15.325	13.504
17.411	15.502
16.936	14.074
15.554	14.218
15.457	15.287
18.256	14.873
17.537	14.702
14.653	14.005
14.38	14.091
14.003	14.168
18.502	14.984
16.798	14.545
15.071	14.472
15.492	14.469
20.286	15.506
15.938	14.262
15.798	14.592
16.627	15.942
22.191	14.189
14.34	15.19
16.369	14.385
17.504	15.515
16.71	14.014
14.831	14.962
14.998	14.658
13.716	13.127
18.214	13.074
14.173	14.691
13.27	13.109
13.329	13.051
20.337	14.512
15.002	12.797
14.977	13.357
13.605	13.461
17.347	14.928
15.238	14.002
13.946	13.774
17.583	17.778
14.112	13.751
13.618	14.528
14.017	13.7
13.295	13.619
14.939	13.595
19.248	13.45
14.634	14.03
14.879	13.292
14.68	12.354
13.099	13.826
18.319	14.757
14.943	13.425
13.918	13.354
14.137	13.238
13.501	13.346
13.541	13.509
20.988	13.517
13.878	12.36
13.652	13.666
14.302	13.393
13.178	13.149
19.137	13.988
14.768	13.938
13.472	13.141
13.228	12.274
17.487	13.275
14.61	13.519
13.875	14.343
13.867	13.905
13.947	13.477
18.503	13.263
14.098	13.142
13.4	13.605
12.227	12.533
18.61	13.741
16.435	13.738
13.194	12.507
15.267	13.999
15.856	13.832
16.608	13.214
13.752	13.465
14.966	13.798
13.582	14.914
19.067	14.961
14.248	14.275
14.941	14.305
14.385	14.73
14.238	15.453
20.483	13.349
14.155	13.411
14.587	14.959
14.613	13.05
21.154	15.444
15.247	14.92
14.705	14.075
15.913	14.401
20.185	15.58
14.278	14.715
14.384	14.356
18.627	14.866
16.723	15.827
16.371	14.648
14.114	14.182
18.067	14.539
16.733	15.681
15.76	14.447
13.589	17.116
17.99	13.38
14.097	14.509
14.766	14.871
14.526	15
13.643	14.933
14.939	17.02
18.865	17.307
15.478	14.445
15.697	13.611
13.591	14.017
17.287	14.897
32.337	14.156
14.238	14.724
13.59	15.733
13.855	15.684
17.489	13.03
15.989	14.62
13.923	13.56
13.03	15.364
14.257	14.64
18.864	13.665
13.473	13.369
14.873	13.522
13.548	14.756
18.849	13.182
14.175	13.655
13.977	13.568
14.295	13.649
17.579	13.684
16.493	13.15
13.474	14.874
13.097	13.766
14.263	13.304
13.471	14.913
21.319	13.263
14.313	13.977
13.373	13.991
13.729	14.856
13.257	13.795
19.09	13.332
13.331	13.881
14.059	15.046
36.463	13.286
18.114	14.486
15.36	12.224
34.606	14.098
16.954	14.443
13.897	13.652
16.064	13.394
16.43	14.702
13.468	12.846
13.312	14.963
14.798	13.396
18.93	13.792
13.919	13.256
21.268	13.476
33.114	14.234
15.57	13.128
13.594	12.465
13.627	13.612
21.564	14.376
13.023	13.219
13.868	14.421
19.521	13.627
13.915	13.238
13.234	13.625
13.206	15.039
13.456	13.453
16.98	13.711
13.95	13.874
13.323	13.521
13.714	13.55
14.42	12.194
15.289	13.08
22.051	13.076
15.562	13.576
13.142	13.473
13.754	13.507
13.268	14.048
18.192	13.594
14.959	15.274
13.601	14.407
13.724	13.401
13.467	13.072
18.285	13.155
15.7	13.378
14.421	13.236
13.818	14.177
13.849	13.082
13.841	13.572
18.656	13.316
13.477	13.953
13.417	13.831
13.452	13.6
18.734	13.224
15.374	15.867
13.668	14.101
13.609	13.415
17.74	14.74
16.764	14.157
14.313	14.077
14.413	14.657
18.123	14.21
15.887	14.331
15.325	14.767
14.799	15.394
18.132	15.937
16.995	15.68
14.416	14.28
14.015	14.539
18.872	14.461
16.68	15.228
15.022	14.882
16.334	14.403
19.811	15.272
16.368	14.093
15.381	14.057
14.201	15.478
18.235	14.356
16.861	14.74
15.59	15.734
14.982	14.59
18.724	15.03
15.386	14.567
14.089	15.189
14.05	14.996
19.253	15.624
16.903	14.897
14.942	16.022
15.693	14.453
19.061	15.458
16.682	14.663
16.233	15.347
17.057	16.455
15.359	15.704
20.761	15.252
14.159	15.433
15.017	15.222
15.595	16.691
20.843	16.081
14.014	14.127
15.145	14.785
14.213	16.623
15.589	16.61
18.619	16.236
16.105	16.124
15.012	16.67
15.156	15.536
14.537	15.699
19.385	14.594
17.743	19.696
15.166	15.876
14.269	15.696
15.94	14.792
18.837	14.602
16.328	14.498
14.384	15.399
15.442	15.313
15.124	15.129
21.011	15.373
16.346	16.246
16.651	15.31
16.244	15.472
21.82	16.889
17.619	15.309
17.11	16.937
19.092	15.173
16.496	15.28
16.076	16.184
15.409	15.346
21.919	16.424
16.582	15.627
14.022	14.7
18.506	14.736
17.468	15.667
21.408	14.497
15.607	15.064
20.758	15.45
16.829	16.032
15.743	14.918
16.777	15.39
18.811	14.118
15.465	37.94
15.061	15.791
17.853	14.246
18.811	15.296
15.744	14.186
15.732	16.283
19.247	15.993
15.184	15.676
15.271	15.826
20.367	15.579
15.69	15.605
15.135	14.927
15.764	15.015
21.996	15.496
45.247	14.586
23.017	15.801
18.722	14.715
16.283	15.199
15.874	14.226
15.395	15.479
16.614	15.508
19.467	15.431
15.219	15.906
14.894	16.94
14.441	18.063
21.193	33.994
15.727	26.527
14.661	14.426
15.111	15.843
16.852	14.952
19.111	15.467
15.106	19.837
15.027	15.857
14.722	15.368
19.114	14.148
15.734	14.849
15.362	15.013
15.354	14.354
18.324	14.219
16.589	15.007
14.294	14.793
15.16	14.381
20.228	14.456
16.836	15.978
14.994	13.154
15.976	15.484
18.117	14.661
16.635	15.551
15.994	14.055
14.861	14.946
18.425	15.699
16.123	14.477
15.935	14.961
15.684	14.226
19.19	14.659
16.07	15.024
15.621	15.134
14.081	14.021
20.279	15.778
15.383	14.252
15.586	14.033
14.203	14.057
19.225	14.096
15.108	15.824
14.945	15.405
18.124	14.228
18.631	15.973
15.096	14.909
17.148	15.824
19.522	14.848
14.23	14.63
15.907	15.634
15.231	15.372
15.219	14.282
18.271	14.281
16.732	15.52
14.076	14.796
14.729	15.19
14.47	14.592
18.802	14.797
16.39	15.532
16.876	15.765
16.547	14.477
15.796	14.6
19.92	14.719
15.432	14.525
15.474	15.182
14.068	14.366
14.867	15.695
18.505	14.055
16.962	15.209
14.782	15.901
15.595	14.189
14.395	15.842
19.196	14.099
15.033	14.106
14.409	14.845
14.857	15.471
18.475	14.347
15.537	14.244
14.021	18.989
15.279	15.984
17.965	15.357
20.407	15.938
15.936	16.599
15.458	15.412
20.706	15.88
17.976	15.765
15.393	15.252
15.338	16.753
21.786	15.667
15.955	15.791
16.739	15.563
16.98	15.074
23.422	15.602
16.605	16.239
15.007	16.524
21.055	15.645
17.881	15.646
16.868	15.875
20.922	16.718
18.163	15.822
15.269	15.378
16.781	16.581
21.394	16.444
16.876	15.664
15.135	16.999
16.764	15.16
21.829	16.809
16.31	16.9
16.671	16.742
23.537	15.654
17.076	17.642
15.62	15.954
16.982	16.637
15.712	16.867
23.257	16.121
16.748	15.888
16.432	16.679
16.97	16.72
22.665	15.095
16.569	16.104
18.129	17
16.504	15.726
20.479	16.96
18.406	16.57
15.666	16.965
16.971	16.08
31.534	16.261
27.141	16.252
16.261	16.737
20.974	16.268
18.073	14.07
21.163	15.394
15.1	15.442
22.013	15.087
15.141	15.5
14.356	16.234
19.906	15.52
14.485	14.984
15.902	13.411
14.434	14.824
14.812	14.826
21.498	15.827
15.47	14.003
15.013	19.951
15.608	14.452
19.81	15.136
17.244	15.036
15.918	16.29
15.217	15.281
20.83	15.481
16.286	15.593
15.158	15.612
15.897	15.989
19.03	14.636
16.308	16.206
16.438	15.771
19.52	15.675
16.027	15.73
15.039	15.313
15.052	15.394
20.135	16.725
16.378	15.092
15.866	15.337
16.16	16.996
21.308	14.128
15.797	16.229
16.237	16.382
20.002	15.243
16.39	15.088
16.875	16.626
15.738	15.108
16.316	16.982
21.378	15.029
16.928	15.681
16.274	17.444
16.956	17.4
20.666	16.262
19.815	16.106
16.129	16.048
23.555	17.081
17.843	16.109
23.96	16.059
16.949	16.848
17.082	17.744
21.307	16.607
17.555	17.528
16.68	16.873
16.689	16.354
17.562	16.068
21.549	16.649
16.705	16.673
18.825	16.326
17.08	16.528
21.977	15.09
15.447	14.895
15.935	15.258
16.815	16.096
22.185	16.481
15.308	15.141
15.463	14.839
18.359	16.468
16.595	15.115
15.967	15.861
16.758	15.708
19.554	14.184
15.187	15.063
15.014	15.428
15.861	16.482
20.487	15.021
16.098	15.158
15.141	15.822
15.169	15.071
21.767	15.237
15.845	15.531
15.21	16.517
16.368	15.11
25.692	15.734
16.122	14.78
18.498	15.602
25.088	15.035
15.663	15.094
16.908	16.086
21.632	16.738
16.488	15.066
16.476	16.354
20.983	15.878
16.286	17.342
16.307	15.144
16.876	15.212
19.288	15.622
17.033	16.968
16.875	16.628
16.429	15.103
16.355	16.368
21.672	16.665
16.825	15.089
16.232	16.944
16.691	15.244
16.104	16.481
21.812	17.277
17.054	16.081
15.449	16.131
16.802	15.4
20.277	16.91
17.65	16.224
16.976	15.799
16.186	16.216
20.324	15.28
17.514	14.215
15.542	15.704
15.168	15.548
22.126	14.589
16.705	15.628
15.66	14.155
17.356	15.433
18.547	15.699
15.021	15.64
14.176	14.424
15.598	15.94
18.178	14.907
19.895	15.639
14.514	14.356
15.396	15.79
20.318	15.63
16.763	14.343
16.109	15.934
15.613	15.006
22.042	15.283
15.463	15.01
15.256	15.682
16.654	15.614
19.809	15.923
15.446	14.34
15.707	17.681
18.604	15.331
19.247	15.332
15.702	14.778
16.095	15.536
18.063	14.571
16.626	15.828
15.69	15.244
15.714	16.158
21.149	16.495
16.007	16.031
18.672	16.939
18.993	15.25
15.835	15.416
30.351	15.458
22.227	15.166
15.004	14.971
15.517	16.838
15.209	14.82
15.022	15.651
19.788	14.803
15.151	14.597
14.243	14.889
14.146	14.652
14.311	13.197
18.642	15.832
16.833	15.363
15.649	14.713
14.35	13.662
15.375	13.97
19.093	14.967
15.805	14.299
14.389	14.695
14.357	13.082
18.235	15.993
14.019	14.302
14.284	14.836
13.655	13.346
14.788	14.088
19.553	14.579
15.34	13.078
15.577	14.833
13.602	14.678
16.844	14.285
19.411	13.623
13.028	14.7
14.671	13.795
14.575	14.447
18.238	13.667
15.493	15.217
13.652	14.744
14.391	14.026
18.026	14.352
15.005	13.61
25.777	14.914
23.079	13.312
14.262	13.914
26.894	14.445
22.505	13.398
13.345	13.59
14.751	13.13
13.741	13.966
19.202	13.354
15.328	13.171
14.174	13.732
14.229	13.331
20.599	14.174
13.165	17.936
14.547	13.856
13.24	14.253
18.122	13.554
13.116	16.532
14.309	14.263
13.196	13.662
17.263	13.429
15.425	13.36
14.039	13.45
14.534	14.433
15.684	13.965
13.715	14.388
18.457	12.538
13.518	14.938
14.422	13.876
13.378	14.025
13.983	13.404
18.347	13.152
13.352	14.653
14.355	14.405
13.244	14.318
14.582	15.947
13.757	13.198
19.768	13.702
14.839	14.87
13.51	13.302
14.683	14.304
13.346	13.244
19.773	14.735
14.041	14.625
14.208	13.496
13.223	13.611
19.957	14.008
14.072	13.866
14.636	14.592
13.561	14.857
14.954	13.434
21.78	13.466
15.596	13.051
13.116	14.149
17.773	13.039
15.16	14.694
14.264	14.683
14.964	14.927
14.258	14.262
18.074	14.35
14.286	14.435
14.83	14.781
14.641	13.336
18.671	13.752
14.272	14.279
14.856	13.789
14.595	14.894
19.066	13.927
15.746	13.125
14.503	13.679
13.734	13.158
17.125	14.636
17.395	13.566
13.824	14.403
14.88	14.374
17.113	13.964
18.398	14.43
13.237	13.462
15.124	14.891
19.571	14.368
16.003	14.724
15.488	14.858
14.123	13.686
18.926	13.002
15.983	17.281
14.054	14.052
15.397	13.925
18.12	14.248
16.191	14.021
13.791	15.525
13.252	15.609
14.423	18.269
19.31	14.152
15.587	13.069
14.824	13.324
14.208	13.594
15.201	15.424
15.338	14.563
20.465	15.114
14.317	15.457
14.298	16.904
15.585	15.138
15.143	15.489
20.615	15.22
16.686	14.13
16.286	14.624
15.92	15.058
18.858	15.47
15.252	14.273
15.152	14.979
13.57	14.866
20.717	14.172
15.317	14.631
15.17	14.46
15.077	16.002
14.901	14.939
19.119	16.866
17.753	14.308
17.58	15.909
15.242	15.534
22.084	15.466
15.399	14.556
15.953	16.487
19.846	14.389
17.689	14.21
15.453	15.741
14.177	14.114
18.764	15.247
16.392	15.721
17.087	15.516
16.111	16.204
20.381	16.812
17.838	15.829
15.359	15.51
15.884	15.22
19.947	16.415
16.266	15.17
16.27	15.852
15.956	15.512
21.259	15.664
15.931	15.911
16.122	16.536
21.068	15.954
16.909	16.762
16.826	14.306
15.616	16.738
20.804	15.409
16.604	16.601
15.021	15.885
20.023	15.932
16.785	15.008
14.328	15.155
15.594	14.185
14.605	15.572
21.877	16.06
16.834	16.408
14.581	14.927
14.88	38.098
15.776	16.722
20.451	14.522
17.676	15.386
15.491	14.367
14.383	14.942
15.136	14.051
20.871	15.261
14.662	14.845
15.879	15.87
14.402	14.591
19.59	15.063
15.467	14.957
15.847	15.563
14.893	14.251
15.43	14.674
18.364	14.706
15.501	15.255
16.621	14.655
15.488	15.047
18.546	16.974
16.412	15.902
16.274	14.869
15.214	16.868
22.086	16.047
18.967	15.805
14.66	14.198
15.662	15.406
21.558	15.643
15.114	14.163
14.808	15.821
19.212	14.218
15.574	15.479
15.381	14.52
14.254	14.419
16.4	15.431
19.838	14.8
14.299	15.755
15.594	14.739
15.757	15.463
19.84	14.842
15.06	14.843
16.206	15.311
16.701	15.31
21.685	15.09
15.176	15.633
16.305	15.09
19.968	15.755
17.654	16.815
15.104	15.429
16.568	15.772
20.63	16.433
16.433	15.846
15.573	15.482
22.79	15.778
16.285	16.89
15.138	15.164
15.837	15.123
19.67	15.828
17.001	15.558
15.339	15.678
16.087	15.676
14.218	15.564
20.902	15.558
17.79	15.031
15.272	16.598
15.946	17.99
32.765	16.21
21.266	16.901
15.445	15.835
15.578	14.91
22.578	15.721
15.022	14.965
15.997	15.859
15.898	15.624
18.624	16.698
16.307	14.108
16.519	16.355
15.884	15.365
14.906	15.464
19.707	15.986
16.875	17.636
15.242	15.606
15.052	15.613
21.797	15.147
16.482	14.911
15.011	15.95
15.845	15.225
20.446	15.17
16.389	15.563
15.952	15.689
15.774	15.14
20.4	14.123
14.609	15.863
14.487	16.465
17.137	15.634
20.538	14.009
15.076	15.781
15.495	15.321
19.404	15.013
16.477	15.628
15.013	15.508
14.927	14.612
18.303	13.416
15.918	14.059
14.069	15.826
13.162	15.55
19.031	15.126
16.596	14.508
16.535	14.228
14.101	14.796
19.682	13.897
14.187	14.772
14.585	14.562
14.121	14.625
19.234	14.66
15.008	14.694
14.034	14.82
29.936	14.803
43.213	14.377
16.599	13.933
14.835	14.517
19.626	15.373
15.227	14.977
14.236	14.105
14.485	14.504
14.885	14.067
18.083	14.409
15.917	14.586
14.543	15.091
14.988	14.117
14.692	14.107
19.095	14.14
17.545	14.17
15.951	15.698
14.816	16.205
16.559	18.546
18.218	14.696
14.883	13.942
13.705	13.796
14.179	14.925
20.327	14.125
13.528	15.968
14.625	14.901
13.682	13.336
21.659	13.756
14.837	13.231
13.297	14.387
14.58	13.767
19.681	13.067
15.525	13.366
13.335	15.592
15.724	14.49
18.209	14.673
15.977	14.261
14.176	14.055
14.148	14.082
14.323	14.204
19.175	14.454
15.713	13.767
14.29	14.964
15.189	14.087
19.019	14.588
15.513	14.195
13.223	13.066
14.42	14.42
19.986	15.53
14.424	16.85
14.833	14.697
14.87	26.746
17.217	18.473
17.849	14.533
20.463	14.528
14.488	14.86
19.513	14.855
15.559	15.177
14.343	14.239
15.563	14.742
19.409	14.565
14.033	14.79
14.838	14.536
14.891	13.947
13.542	14.422
18.684	14.672
16.526	14.085
14.716	14.119
14.639	14.372
15.906	14.688
18.027	13.216
15.779	14.026
13.162	14.33
14.045	14.173
14.362	14.236
18.293	14.498
15.848	14.502
15.176	14.606
13.155	15.522
15.93	15.305
18.615	15.114
15.884	16.094
15.489	14.504
14.122	14.454
14.123	14.744
17.293	13.202
15.098	14.927
14.44	17.648
14.844	14.76
17.175	15.245
17.322	14.431
14.702	13.282
14.547	14.094
18.71	13.935
16.083	14.227
14.432	14.797
13.281	14.395
15.727	14.781
20.875	14.932
14.864	14.49
15.901	14.154
14.171	15.368
20.797	14.266
13.272	14.323
13.064	14.463
15.842	14.699
14.945	13.124
18.93	13.647
15.352	14.871
14.304	13.479
13.141	13.33
37.522	14.297
16.29	13.67
16.926	13.879
15.901	13.276
13.651	14.15
14.954	13.042
13.359	14.166
19.895	13.54
14.985	14.224
14.993	13.649
12.306	13.728
18.49	12.343
13.297	12.819
13.45	12.753
18.949	13.955
13.902	12.042
13.909	13.094
13.744	14.947
12.631	12.073
17.744	13.094
13.032	12.08
13.181	12.394
13.695	12.603
13.956	13.759
14.286	13.684
17.134	14.97
14.763	12.179
14.004	14.909
13.422	15.137
14.186	14.063
14.859	13.07
18.495	13.534
14.708	13.451
13.917	13.669
14.389	13.313
13.864	13.524
19.008	13.878
15.85	13.548
14.209	13.671
13.939	14.063
13.891	13.464
18.847	13.704
15.227	13.041
13.973	14.413
13.696	13.142
18.073	12.405
14.682	14.276
14.181	13.612
13.24	13.082
15.887	13.441
18.512	13.423
14.534	18.748
14.401	13.022
14.497	14.606
19.009	14.75
14.609	14.365
14.599	14.978
14.08	14.063
13.776	15.126
19.098	14.796
15.346	13.426
14.281	14.969
13.775	14.448
20.59	14.847
14.203	14.183
15.088	13.213
14.319	14.339
20.407	15.577
13.18	13.913
14.168	14.644
13.551	14.346
19.531	14.603
14.352	15.665
14.697	14.429
15.314	14.636
20.052	15.423
15.122	14.915
15.07	14.771
15.294	15.04
18.076	15.043
15.665	15.328
18.49	14.224
16.892	14.821
14.846	15.703
15.355	14.18
14.049	15.347
17.616	14.689
18.593	14.891
14.52	15.577
15.321	14.594
16.213	15.034
19.514	15.095
15.59	16.478
15.566	15.033
14.098	15.423
14.233	14.311
16.57	15.637
18.194	16.769
15.859	16.78
14.774	14.462
14.003	14.44
19.556	14.322
17.598	14.109
16.267	15.114
15.517	14.208
15.694	15.262
20.317	15.162
15.754	15.063
15.548	15.18
15.117	15.818
15.502	16.941
20.585	16.003
15.852	14.174
15.431	15.362
14.582	16.607
20.091	14.129
17.555	15.709
17.213	15.63
19.335	15.309
15.422	16.611
15.771	16.291
15.879	14.39
18.086	14.869
16.497	14.294
15.915	16.389
14.321	15.098
18.646	15.216
16.536	14.784
16.039	18.218
16.815	14.654
19.318	14.119
14.085	14.675
14.172	14.508
15.742	14.455
18.026	15.405
14.638	14.169
14.213	13.971
14.484	14.032
16.824	14.357
17.588	15.512
14.311	13.678
19.966	14.731
18.491	14.901
14.742	14.473
15.392	14.784
18.927	14.06
15.153	14.251
14.046	14.005
14.809	14.639
14.387	13.61
18.853	14.257
16.324	14.05
14.777	14.663
15.812	14.026
14.84	14.099
16.621	15.595
20.413	14.124
14.151	14.523
14.612	14.402
15.051	14.449
15.075	14.578
20.683	15.469
15.36	14.197
14.078	15.733
14.143	14.55
17.03	14.366
18.077	15.587
14.103	15.418
15.743	15.336
15.324	15.647
19.138	15.303
15.31	14.286
15.517	15.999
15.957	15.837
19.178	14.723
15.57	15.803
15.146	15.249
15.085	14.17
20.5	15.28
16.447	14.085
15.263	14.222
15.066	15.279
20.442	15.093
15.545	16.595
14.092	14.833
15.378	15.228
19.072	14.966
15.101	15.314
15.705	14.768
14.571	17.109
19.199	15.658
15.348	14.157
15.594	14.084
15.21	15.191
19.938	14.94
15.698	14.976
15.345	16.247
14.366	15.005
19.543	14.984
15.493	14.386
14.138	14.587
14.642	15.616
19.012	14.313
15.392	14.15
13.33	14.775
14.116	14.683
20.077	13.618
15.107	13.864
15.439	14.923
13.902	13.131
19.955	14.096
14.223	14.372
15.411	15.907
15.99	14.62
13.926	14.532
21.26	13.841
15.001	14.895
13.23	13.246
14.658	14.515
13.251	13.092
20.956	14.617
15.504	13.565
14.168	14.732
13.263	13.117
13.714	13.454
17.867	13.809
14.741	14.865
14.211	13.865
13.123	14.917
15.084	13.444
19.647	13.319
14.59	13.451
15.461	13.759
15.947	14.049
21.755	13.405
14.345	13.212
13.099	13.245
14.707	14.08
18.574	13.426
14.437	14.231
13.536	14.929
14.591	14.78
19.297	13.246
14.17	14.929
14.428	14.255
14.287	13.22
13.42	14.236
19.149	14.644
15.648	13.408
13.697	13.845
14.716	14.706
17.932	13.058
17.868	15.341
14.263	14.314
14.239	14.947
18.767	15.006
15.8	15.358
15.443	15.872
14.421	14.646
15.327	14.058
19.649	14.523
16.336	16.109
14.249	15.125
14.009	13.311
18.366	14.115
15.51	14.849
14.717	14.854
14.002	14.614
18.302	14.649
15.21	15.555
15.106	15.482
14.15	14.927
19.443	14.478
15.615	15.468
15.497	14.06
18.605	14.399
15.157	14.07
15.338	14.206
14.237	17.992
14.791	14.185
18.466	14.097
16.496	14.366
15.264	14.058
14.272	15.164
14.801	15.661
19.691	15.412
16.738	14.296
14.469	14.472
14.646	14.525
14.752	14.223
19.028	14.394
15.389	14.735
15.901	14.17
14.795	15.759
14.778	14.625
18.719	14.839
14.384	15.637
15.081	14.099
16.418	14.897
22.044	15.316
16.494	14.242
15.678	14.576
14.831	14.21
20.158	15.152
15.395	14.509
14.116	14.107
14.482	14.009
14.616	14.065
20.341	14.008
15.848	14.946
14.204	14.785
17.466	14.334
34.353	14.699
15.088	16.217
15.052	14.718
19.485	14.847
16.47	14.901
14.362	14.376
14.232	14.477
18.631	14.662
15.919	15.383
14.041	13.951
13.343	13.71
13.1	13.616
21.966	13.253
15.293	13.968
14.175	13.101
16.077	13.363
14.902	13.139
13.058	13.051
13.352	13.93
13.592	13.261
17.154	13.032
14.044	13.082
25.922	13.217
25.478	14.363
14.855	13.683
14.368	13.572
17.134	14.922
15.498	13.7
13.418	13.911
13.427	13.097
13.812	12.756
12.02	13.437
19.608	13.37
13.221	12.221
12.808	13.517
13.656	12.02
12.972	12.543
14.907	12.302
15.875	12.652
12.384	13.774
13.985	12.638
13.687	12.153
12.725	12.999
17.066	12.073
15.231	12.348
12.032	13.868
12.489	13.724
13.049	12.828
12.693	12.81
17.532	13.985
13.023	12.655
12.045	12.244
13.304	12.533
12.272	12.108
12.449	12.308
20.009	12.846
12.471	12.604
12.015	13.792
12.145	12.845
12.829	12.185
14.827	13.746
15.209	12.783
12.346	13.648
14.645	12.081
12.726	12.696
16.653	12.659
12.173	12.788
12.247	12.264
12.702	11.829
11.054	14.195
16.641	11.184
14.332	12.175
13.953	12.085
11.781	12.681
12.347	11.281
16.942	12.016
12.501	12.414
12.14	12.68
11.494	12.248
12.417	12.856
17.081	12.297
12.167	12.117
12.244	14.419
12.635	14.153
16.951	12.809
14.004	12.851
14.995	12.637
12.845	13.968
12.834	12.047
18.76	12.368
15.393	13.117
13.14	12.589
13.069	12.006
16.566	13.342
14.272	13.257
12.821	12.756
13.363	12.644
12.805	13.76
18.748	12.468
12.365	12.694
12.668	13.066
18.095	16.689
15.987	12.312
12.403	13.103
13.034	12.016
12.995	12.999
12.52	12.533
18.61	12.131
13.944	12.804
12.18	12.586
12.602	12.285
12.02	12.913
12.05	12.379
18.237	13.949
13.05	12.143
12.722	13.797
13.053	12.01
13.905	12.06
13.737	13.903
18.023	12.05
13.896	13.678
13.632	13.806
13.261	13.207
13.715	12.022
16.825	13.853
14.757	13.378
13.716	12.616
13.7	13.692
13.827	13.825
19.91	14.796
14.916	12.255
25.683	13.947
21.789	13.792
14.281	12.708
12.944	15.658
13.65	12.244
16.936	13.653
15.828	13.75
13.106	13.169
13.891	13.501
12.501	12.652
17.697	13.268
14.469	12.503
14.188	13.823
13.127	13.486
13.687	12.869
19.068	14.975
15.003	13.707
12.51	13.319
13.947	12.436
13.956	13.164
18.176	13.881
14.327	13.676
13.018	13.881
12.017	13.064
17.45	12.286
14.756	14
12.241	13.976
14.377	13.364
16.568	13.531
16.089	12.538
14.15	13.03
13.881	13.335
13.202	14.469
19.221	13.939
13.644	12.439
13.344	14.512
13.011	13.196
17.022	13.19
14.799	12.698
13.348	14.556
16.855	12.651
16.541	13.005
13.636	13.424
13.072	13.939
13.736	12.869
13.731	13.407
19.724	13.831
13.786	13.123
13.643	16.497
13.405	13.369
12.87	12.221
17.926	13.267
15.122	13.366
13.048	12.667
13.783	13.829
12.557	12.279
13.079	12.508
17.629	13.889
13.613	12.521
12.47	12.11
12.736	12.236
12.545	13.166
12.549	12.137
27.718	13.251
17.594	12.782
13.073	13.295
14.172	13.673
16.241	13.316
14.557	12.825
13.939	13.366
13.378	12.103
20.175	12.738
13.274	13.661
13.727	12.898
12.847	12.168
13.371	13.072
16.252	13
13.858	13.933
12.541	12.836
13.526	13.056
13.25	12.482
18.501	13.724
13.611	12.622
13.72	13.681
13.175	12.796
13.789	13.301
18.029	12.879
13.611	12.945
15.839	13.97
12.535	12.078
12.184	12.68
17.603	13.813
14.322	13.829
13.528	14.793
13.235	15.335
17.951	14.033
14.264	15.069
14.519	13.521
15.664	14.317
17.543	14.252
18.377	13.58
14.46	15.303
14.571	14.679
16.073	14.221
17.73	14.647
14.232	14.749
15.583	15.417
16.092	15.975
18.221	13.544
13.519	13.604
16.683	13.346
16.053	13.85
13.344	14.642
15.037	13.328
13.367	13.05
13.503	14.074
17.577	13.709
14.584	13.93
13.757	13.323
13.925	13.085
13.976	14.663
17.679	13.953
14.736	13.479
13.776	14.162
13.458	13.06
13.751	16.456
13.593	14.977
19.466	13.048
13.36	13.982
12.017	13.323
14.014	13.511
17.937	13.748
14.143	13.519
14.444	13.922
14.795	14.212
14.9	14.207
18.263	14.578
15.645	15.749
14.783	14.325
14.996	16.359
15.39	16.798
15.416	14.528
20.719	15.226
14.269	14.85
16.086	14.192
18.462	14.988
16.188	14.923
14.073	16.651
14.02	14.259
18.054	14.343
15.026	14.834
14.513	14.016
14.501	15.013
20.16	15.919
16.651	14.329
14.939	14.04
14.258	14.888
17.248	14.522
16.479	14.563
13.766	14.924
15.732	14.197
14.079	13.744
20.675	14.573
14.074	15.852
14.04	13.582
15.266	14.778
20.34	14.788
14.586	15.158
14.405	14.351
17.494	14.758
19.111	14.089
14.539	13.915
13.493	14.376
16.616	14.957
16.124	13.743
14.415	14.348
14.948	14.21
14.415	13.908
19.571	14.43
14.729	13.313
15.336	15.462
13.289	14.058
14.92	14.314
20.843	14.138
15.917	13.246
14.401	14.193
13.698	13.525
14.764	14.725
17.325	14.119
14.591	14.219
14.515	14.372
14.176	13.805
14.394	14.139
14.52	14.476
20.409	14.282
15.989	15.176
13.295	17.564
14.546	15.548
14.987	14.121
21.988	13.335
15.512	14.977
15.21	15.8
14.761	15.003
33.718	14.848
33.354	15.795
22.626	15.034
16.263	15.344
15.091	15.981
15.021	15.623
18.344	15.135
15.265	15.11
15.1	15.708
19.871	15.402
16.327	15.318
15.699	15.775
15.198	15.883
15.101	15.292
20.327	15.858
15.379	13.143
15.278	15.953
14.657	14.895
21.209	15.71
14.688	14.301
14.195	15.439
14.177	14.641
30.289	15.152
22.584	14.25
14.252	15.961
[truncated: 880 more rows]
