# Supplementary material for: Improved GNSS integer ambiguity resolution method based on the column oriented Cholesky decomposition
Source: Research Square preprint supplement (doi:10.21203/rs.3.rs-2360038/v1), 2022-12-20
Supplement: Supplementary file 16 [file Middle baseline solution time.xlsx]

## Sheet: Sheet1
17.315	18.85
22.827	18.428
17.537	17.634
17.968	17.705
23.461	17.772
17.601	17.26
17.349	16.299
21.858	17.058
17.014	16.821
17.646	17.078
17.314	16.991
17.326	18.366
20.183	18.337
16.637	17.069
18.721	16.776
18.287	18.193
22.716	16.999
17.341	17.113
17.838	17.495
19.543	17.495
20.974	16.925
17.475	17.934
17.397	16.582
16.905	17.692
20.56	20.819
20.799	17.133
17.86	17.274
17.278	17.928
22.285	16.188
18.965	17.622
17.722	18.343
17.825	17.251
23.093	18.908
18.838	17.628
17.267	18.822
21.354	18.378
19.202	18.011
19.608	21.089
21.965	17.882
18.543	16.213
17.566	18.223
17.107	17.77
22.903	16.974
17.664	16.071
16.275	16.271
20.429	16.106
20.81	17.491
17.852	20.172
17.005	17.253
22.998	16.16
17.738	16.498
16.977	17.187
21.841	17.475
19.447	17.552
17.143	17.284
17.683	17.661
25.378	18.35
17.89	18.746
19.788	17.583
25.625	18.644
18.908	18.425
23.017	18.436
18.461	17.941
18.747	18.463
17.422	17.336
22.174	18.497
20.834	18.975
17.692	17.325
18.044	17.675
22.208	17.051
18.704	18.525
18.996	17.4
18.919	17.327
27.843	18.664
18.021	17.145
22.343	18.565
18.443	17.81
24.959	18.208
18.619	17.761
19.666	17.914
19.968	18.372
24.544	17.469
18.079	21.65
18.522	17.627
24.833	17.328
18.119	18.177
24.975	17.826
24.805	18.417
18.448	17.724
17.239	18.271
24.946	17.39
17.639	18.605
18.741	17.612
22.509	17.103
18.045	18.036
17.259	18.119
20.881	18.606
20.155	17.806
17.227	17.614
19.668	17.537
24.42	18.657
17.653	17.339
17.314	17.805
22.044	18.106
18.556	18.546
18.219	18.278
21.933	18.029
20.807	17.741
18.402	18.443
18.485	17.369
24.725	18.619
18.268	20.911
23.775	17.046
17.902	18.725
18.97	17.63
17.327	17.988
23.419	17.982
18.806	19.512
18.017	18.752
18.055	18.503
25.195	17.656
19.245	18.908
18.504	17.283
18.954	18.351
25.322	18.218
18.703	18.929
17.298	18.57
18.337	17.566
24.698	18.269
18.705	18.039
17.964	18.007
18.716	17.362
24.819	18.815
18	17.977
17.486	18.16
23.092	17.565
19.965	17.978
17.673	17.828
18.238	17.79
22.333	18.659
21.459	28.285
19.437	17.493
24.548	17.598
17.999	17.806
18.858	16.877
22.252	18.145
18.023	17.605
18.546	18.484
22.03	19.107
19.148	18.876
19.886	19.309
23.756	20.132
19.808	19.768
18.132	18.572
23	19.351
20.777	18.965
18.91	19.039
19.171	18.2
24.308	18.802
19.724	18.19
19.436	19.3
28.252	19.174
20.439	20.314
23.4	18.953
18.686	17.601
18.422	18.097
18.152	18.084
23.792	17.692
18.724	17.467
17.325	18.324
18.471	17.631
24.11	17.669
19.917	17.315
17.634	17.753
16.236	16.178
22.3	16.864
16.123	16.831
17.518	18.449
17.362	16.09
23.999	17.086
19.825	17.577
17.909	17.585
17.338	17.554
24.268	17.72
17.894	17.469
16.815	18.976
17.728	17.43
24.151	17.513
17.909	17.168
17.931	16.902
21.749	17.163
18.001	17.485
16.901	16.507
23.247	17.951
21.006	17.03
16.168	16.372
17.761	18.606
22.689	18.991
18.888	17.044
17.676	17.815
21.595	17.598
18.265	16.679
16.935	17.042
17.927	18.981
22.4	20.012
18.687	16.204
17.264	17.023
23.086	17.452
18.673	17.447
17.22	17.063
21.722	18.109
18.096	17.462
17.489	17.795
16.707	16.946
24.008	18.832
18.228	17.772
21.247	16.551
17.091	17.807
17.383	17.709
17.659	19.383
19.835	17.044
19.884	17.21
17.704	17.442
16.198	16.606
17.06	18.523
24.532	17.139
17.544	17.666
17.188	16.926
20.026	17.678
43.401	16.663
37.898	17.672
26.924	17.135
17.752	17.164
16.061	18.959
24.298	19.064
18.998	17.903
19.7	16.68
22.508	16.616
23.599	17.596
17.359	17.872
22.49	17.837
22.611	16.481
18.491	17.696
22.114	17.755
20.051	17.342
20.956	17.033
20.767	17.146
18.055	17.131
17.962	16.597
16.388	16.559
22.893	17.973
18.183	16.19
17.693	16.269
20.874	17.656
20.449	16.247
17.132	16.235
17.952	17.816
24.867	17.484
17.277	17.949
16.037	16.969
23.319	16.691
16.228	16.537
17.34	16.214
32.512	17.778
17.028	16.34
19.74	16.36
25.388	16.067
20.336	17.157
17.821	17.715
17.716	18.453
26.232	16.713
19.671	17.671
17.542	16.799
16.957	16.091
22.864	16.551
17.528	16.989
18.66	16.116
16.044	15.268
22.638	16.416
16.686	15.251
15.854	15.435
16.955	16.198
15.047	17.704
23.691	15.716
15.415	15.09
15.538	15.377
16.863	15.022
19.984	16.575
18.983	15.581
15.076	15.135
16.054	16.093
20.486	15.041
16.335	15.174
16.143	15.709
18.789	15.051
22.081	17.895
15.567	15.88
15.903	15.027
17.837	14.601
17.925	31.724
16.258	30.385
14.781	13.325
18.218	14.927
16.054	15.344
14.782	14.807
15.675	15.526
20.462	15.597
16.253	15.812
14.404	15.342
18.699	15.782
23.689	15.116
15.921	15.855
14.944	13.083
14.095	15.562
24.244	13.346
18.534	14.891
41.963	14.035
35.106	14.305
25.906	17.796
16.779	15.313
16.81	15.229
15.926	15.795
22.184	15.547
15.037	14.71
14.11	15.222
14.21	15.56
14.56	14.233
20.818	15.778
16.948	14.151
14.946	15.482
15.494	14.823
15.568	14.627
20.707	16.384
16.576	14.003
17.849	16.543
15.051	15.347
18.803	14.716
15.307	14.634
15.146	14.196
15.585	15.264
14.748	14.708
18.126	14.706
16.534	15.081
15.239	15.591
15.294	15.843
18.354	14.329
16.263	14.514
16.65	15.47
15.675	16.338
19.183	15.559
15.03	15.428
15.129	15.305
15.491	15.285
15.541	14.124
21.224	15.973
16.69	14.403
15.299	15.553
14.856	15.402
20.901	14.294
16.909	15.388
14.638	15.482
18.604	14.548
17.884	15.099
15.751	15.026
15.773	15.897
18.051	14.336
16.582	15.13
14.565	15.679
14.006	14.831
17.131	14.007
16.914	15.183
16.294	14.898
15.671	14.226
19.799	15.556
17.919	14.574
14.624	14.435
15.759	16.39
18.894	16.572
16.41	16.594
14.934	15.428
15.835	14.869
19.47	15.137
16	14.437
15.373	14.245
15.452	15.098
20.706	14.757
15.698	15.501
14.226	15.573
15.608	14.101
15.816	15.095
19.888	16.431
16.383	16.89
15.592	14.595
14.694	15.819
15.409	15.642
20.921	14.494
17.367	16.745
15.771	15.582
16.317	14.76
15.695	15.556
22.562	14.307
14.54	15.619
15.412	14.601
15.489	15.209
22.001	15.385
20.533	16.128
17.855	15.369
16.106	15.785
23.841	14.306
21.783	15.244
17.31	14.977
22.801	14.787
14.579	16.342
14.544	18.717
16.99	14.702
17.802	14.438
20.781	14.112
18.338	14.377
15.641	16.188
26.183	15.569
15.222	14.7
18.804	13.306
24.752	13.998
15.151	14.868
16.51	14.018
16.847	15.966
19.376	14.86
17.656	15.596
20.485	14.352
19.737	14.659
19.742	14.238
15.183	14.268
16.26	15.701
21.761	16.491
16.377	15.807
14.172	16.953
20.645	15
17.103	15.059
16.422	16.724
16.352	16.856
19.495	15.712
17.174	15.353
15.652	15.882
22.981	16.876
16.669	15.559
15.742	16.528
16.894	15.953
16.579	16.027
20.951	15.277
16.394	15.316
16.576	16.462
15.658	15.04
19.286	15.657
17.274	16.124
17.815	16.944
16.773	15.526
14.339	15.005
21.882	16.61
18.376	16.98
15.973	16.002
15.42	15.27
20.138	15.266
16.578	15.181
14.695	15.923
15.449	15.04
15.595	15.703
23.509	16.592
16.954	14.3
14.022	16.467
20.016	15.845
17.563	16.253
15.669	16.062
16.946	15.469
19.506	15.103
16.468	16.162
16.28	15.221
15.36	15.695
21.629	15.768
17.425	17.551
16.002	15.802
16.696	16.819
21.601	16.129
15.894	16.802
15.498	15.625
20.371	16.422
17.862	15.232
15.426	16.795
15.627	15.553
21.132	17.969
16.54	15.446
15.415	16.198
16.535	16.735
23.329	15.861
16.45	16.319
15.559	16.542
20.214	15.595
16.278	15.092
15.826	16.403
15.24	17.864
20.737	16.813
17.893	15.941
15.035	15.465
17.208	16.949
23.183	16.111
15.536	15.625
15.179	16.72
18.913	15.218
20.537	23.27
16.33	16.912
22.959	16.415
20.809	17.284
36.916	16.839
17.915	16.646
16.652	17.244
22.882	15.562
19.264	16.709
16.298	17.274
17.501	16.942
17.065	17.361
24.835	16.689
18.31	16.531
16.165	17.473
22.883	17.706
18.2	16.218
17.191	17.486
20.907	16.148
18.107	17.125
17.065	17.033
17.312	16.464
22.697	16.948
18.585	17.502
16.309	17.56
17.56	16.428
22.746	18.297
18.531	17.163
17.28	16.484
21.001	16.298
19.224	17.791
17.096	16.798
18.323	16.455
22.79	17.376
17.777	17.888
25.66	15.563
20.678	16.337
17.462	16.072
16.426	16.958
19.315	15.844
20.222	17.595
16.085	15.062
17.416	16.507
23.613	16.287
17.755	15.243
16.567	15.81
21.324	16.335
18.288	15.295
15.602	16.705
17.649	15.899
22.962	15.07
18.535	16.477
15.631	16.923
16.951	17.553
21.492	15.414
16.404	16.431
15.031	16.701
16.484	16.482
19.433	15.835
17.21	16.751
16.032	15.382
15.855	16.585
16.436	15.187
22.236	15.964
16.955	15.453
16.191	15.083
15.917	16.678
20.221	16.973
17.756	15.365
16.008	15.719
16.932	15.634
21.793	15.794
16.606	16.91
16.049	16.471
15.024	15.044
21.618	15.509
16.479	16.751
16.22	17.578
16.496	16.234
22.598	16.816
15.162	17.255
16.646	16.961
19.405	16.857
31.606	18.719
16.31	15.829
21.49	16.84
19.964	15.698
16.385	15.825
16.035	16.252
20.8	15.208
16.112	16.605
17.93	15.15
15.956	17.515
20.529	16.303
17.879	16.408
17.532	16.386
17.753	17.17
24.706	17.925
16.001	17.786
17.958	17.219
23.741	16.283
17.581	17.836
16.979	17.202
21.444	18.905
18.878	18.606
17.886	17.497
23.895	17.522
17.677	17.314
17.778	16.051
16.228	17.287
21.61	16.803
17.809	17.038
17.085	17.451
16.881	16.565
18.828	17.971
24.158	17.626
17.428	17.833
18.318	17.081
16.764	17.494
23.396	17.322
18.222	16.077
16.21	17.737
17.093	17.715
20.621	16.941
18.402	17.116
17.892	16.172
16.251	17.663
23.328	17.801
16.432	17.661
17.266	16.554
22.351	17.673
18.8	17.249
19.736	16.631
16.415	16.291
22.796	18.779
17.189	16.574
17.842	16.82
21.453	16.183
17.039	17.603
17.09	16.444
21.693	17.978
20.466	17.716
17.326	18.351
20.764	16.961
23.228	17.144
16.328	17.097
17.885	16.978
22.719	17.611
17.648	16.436
17.924	16.575
21.881	17.289
17.825	16.756
18.113	16.755
16.751	17.661
24.081	17.275
18.608	17.073
16.545	16.595
20.557	16.52
18.728	17.459
17.097	17.607
17.949	16.338
22.813	17.939
18.991	16.41
16.023	16.072
18.027	17.576
22.119	16.177
17.146	18.049
17.898	16.944
17.501	18.626
20.244	16.592
18.747	17.673
17.824	17.096
17.612	17.227
17.255	17.176
21.478	16.157
18.509	17.604
17.543	17.161
16.435	17.686
22.646	16.811
18.897	16.183
16.384	16.929
16.749	16.82
19.068	17.559
18.79	16.669
17.481	16.545
16.169	16.859
27.608	17.225
17.79	16.698
17.641	16.356
22.08	17.159
17.798	16.57
17.683	18.581
19.808	16.908
19.876	17.244
16.118	18.736
17.925	17.998
22.108	16.566
18.051	16.891
17.509	17.296
20.521	16.62
19.26	18
16.465	17.096
17.042	17.013
23.436	17.568
17.948	17.788
16.285	17.847
21.715	17.175
17.867	17.568
17.912	17.544
22.244	17.393
18.235	17.377
17.542	17.996
17.044	17.81
23.102	17.596
17.223	16.023
19.411	16.947
18.451	16.926
16.842	15.078
17.33	16.159
16.809	16.726
25.615	16.537
18.008	16.029
16.328	16.201
16.139	15.989
22.34	16.16
17.388	16.749
16.502	16.629
16.717	17.072
16.516	17.076
22.946	15.521
16.243	16.679
17.318	16.552
15.416	16.157
24.21	17.749
17.074	17.987
17.897	17.064
20.313	16.39
18.517	17.3
18.336	17.317
16.03	17.886
22.995	18.438
17.416	18.78
16.732	17.263
21.691	16.693
19.955	17.666
16.372	17.113
21.856	16.561
19.559	17.177
16.956	17.726
18.269	16.134
25.482	17.499
17.597	17.851
16.783	17.007
18.902	16.735
16.952	19.165
23.09	16.057
17.457	17.88
16.381	17.272
23.967	17.157
17.92	16.299
17.047	17.122
20.716	16.077
18.997	17.588
16.842	17.54
18.462	16.089
23.25	18.8
17.734	17.211
17.066	16.052
20.379	16.176
17.43	17.223
17.377	17.752
21.724	17.311
19.671	16.743
16.276	17.471
16.98	16.21
24.128	17.056
18.026	16.648
16.634	18.638
17.167	17.313
20.126	16.44
18.59	17.844
18.762	17.158
16.428	17.896
17.492	17.79
23.485	17.425
18.095	17.015
18.219	17.744
23.233	17.469
17.599	20.452
17.978	17.874
21.576	17.029
18.077	17.897
17.582	17.418
17.155	16.762
20.282	17.839
17.815	17.2
17.401	17.694
17.449	17.425
24.159	17.14
18.843	17.731
17.326	17.628
17.061	17.832
20.039	15.19
16.895	15.3
17.153	16.922
15.207	16.41
22.55	16.519
15.792	17.029
16.974	15.78
22.865	17.078
17.176	17.963
18.942	16.309
16.06	17.486
22.464	18.015
17.245	17.639
16.576	16.163
21.01	17.019
17.982	16.476
17.919	16.831
17.902	16.88
23.508	17.332
15.92	15.004
16.062	15.762
19.305	14.899
16.558	16.865
16.614	16.735
20.913	16.02
16.962	16.553
17.745	17.419
16.114	17.397
22.804	16.872
18.893	17.51
18.798	16.1
17.481	17.587
19.996	16.147
21.65	16.582
16.219	17.535
17.332	17.133
16.752	17.65
21.59	16.055
17.826	17.196
16.286	16.902
17.209	17.773
25.543	16.753
19.587	16.555
15.454	17.305
20.832	16.53
17.834	16.708
17.339	17.859
16.755	17.514
24.15	16.46
17.673	17.756
16.546	16.848
19.125	16.065
22.857	16.978
17.698	19.469
16.872	16.742
22.643	16.985
17.452	16.724
16.405	15.769
16.961	16.714
20.816	16.884
16.228	16.99
16.624	15.703
16.689	15.959
22.807	15.946
17.29	16.464
16.539	15.731
19.5	15.386
16.764	16.169
15.556	16.727
16.141	15.906
21.518	14.33
15.189	16.464
16.454	15.294
15.019	16.424
20.901	17.421
17.671	16.2
15.974	16.803
19.177	15.425
17.195	16.015
16.299	16.468
15.83	15.42
20.162	15.467
15.801	16.647
16.66	14.289
15.24	16.946
15.594	15.845
22.747	16.411
16.814	15.636
16.526	15.343
16.899	15.883
18.571	15.568
17.213	16.664
15.486	14.632
16.558	16.161
15.978	16.27
20.902	15.133
16.577	15.552
16.338	15.814
15.047	15.948
16.794	16.753
21.067	16.799
15.117	15.471
16.818	16.485
16.196	15.231
19.055	15.596
17.762	15.523
16.242	15.063
15.933	15.71
18.189	15.83
20.288	15.252
15.029	15.185
15.115	15.554
21.087	15.857
16.375	15.875
15.279	15.622
15.472	15.617
20.197	16.537
16.773	15.613
14.701	14.83
17.609	15.629
21.761	15.874
14.661	14.869
15.231	15.772
18.243	15.278
16.269	15.833
15.999	15.845
15.287	15.97
19.789	16.436
15.389	15.78
15.348	16.99
16.85	15.454
19.929	14.547
16.158	15.856
14.288	14.384
14.164	15.538
21.156	15.388
17.956	14.416
15.511	15.739
16.282	14.781
20.913	15.731
16.47	15.33
20.157	16.874
15.361	16.171
14.939	14.563
15.039	15.585
15.171	15.593
19.149	15.763
16.948	15.896
16.064	15.461
15.212	15.101
15.003	16.357
20.927	15.51
15.801	15.728
17.624	15.542
14.411	16.723
15.371	16.03
20.687	16.216
17.852	16.265
15.225	15.177
15.386	15.277
19.98	14.632
21.056	15.506
16.304	15.312
20.41	15.741
21.485	14.053
15.688	14.3
15.017	15.672
20.513	15.693
17.278	16.375
15.751	15.674
15.474	15.614
15.589	14.146
21.361	14.366
17.736	14.648
14.444	15.009
15.898	14.059
21.394	14.592
15.228	14.004
15.694	14.287
18.695	14.95
15.124	14.319
15.644	15.158
14.637	14.978
15.376	14.503
20.017	15.772
14.323	14.25
14.298	14.737
16.702	14.416
20.964	14.077
14.565	15.021
14.815	14.544
18.984	15.423
16.392	14.205
15.478	14.445
14.039	15.784
15.731	14.157
20.556	15.43
15.275	14.351
16.741	15
28.141	14.548
17.482	15.879
15.117	15.996
19.11	14.639
17.818	15.893
14.134	15.579
20.584	14.981
14.019	14.828
20.584	14.427
16.281	15.763
15.542	15.561
15.024	15.955
15.583	16.67
23.615	15.513
16.03	14.13
15.706	15.962
15.742	15.862
20.902	16.461
16.85	15.672
15.583	15.851
15.985	15.873
16.895	15.496
22.47	15.877
16.564	15.088
15.488	15.251
15.921	15.732
17.205	15.901
19.54	17.239
15.167	14.966
14.072	15.206
19.74	16.376
17.359	14.526
14.173	15.34
18.143	15.996
26.2	16.598
21.524	15.49
16.259	15.159
23.196	15.123
18.422	15.138
16.507	15.558
18.762	15.503
17.791	15.007
16.28	15.781
16.887	15.493
21.96	14.842
19.901	15.809
15.482	14.896
16.533	16.99
21.366	15.195
15.435	14.748
14.509	15.551
19.804	15.646
17.453	16.536
16.819	16.054
15.744	19.143
20.364	15.353
18.572	15.856
15.443	15.364
15.311	15.077
21.605	16.646
16.948	15.978
15.547	15.271
19.901	16.409
17.079	15.3
16.255	16.681
16.155	16.119
16.535	18.032
20.356	15.48
17.77	16.346
17.031	16.416
16.559	16.917
16.844	16.054
21.559	16.725
17.726	15.23
15.398	16.105
16.007	17.998
20.297	15.564
17.356	16.937
16.259	16.422
16.59	17.367
19.681	16.878
22.87	17.594
17.513	17.158
16.502	16.353
24.891	17.817
17.652	16.492
16.578	16.648
21.254	16.435
17.53	16.788
17.683	16.119
16.499	17.051
16.496	16.955
23.022	16.997
16.529	16.468
16.078	16.469
20.083	16.005
17.56	17.905
17.17	16.137
16.179	16.74
23.382	15.775
16.589	17.744
16.132	16.596
22.296	15.278
18.385	16.517
16.256	16.259
22.839	16.971
30.444	15.474
19.922	17.334
22.611	16.227
16.159	16.334
17.898	15.202
19.075	16.736
17.485	16.969
15.682	16.906
18.489	15.416
30.885	16.395
19.502	17.063
15.106	17.166
21.929	15.678
17.971	16.279
16.142	15.777
15.506	15.591
20.208	16.815
17.431	15.553
16.473	16.455
16.858	15.327
17.204	16.438
23.203	15.411
16.691	16.596
16.509	16.367
15.86	16.636
20.138	16.201
19.231	16.255
16.163	17.362
17.859	16.584
18.774	17.127
25.698	16.79
18.332	19.55
19.697	17.544
22.99	17.743
20.492	16.198
16.181	17.532
24.33	17.782
18.587	17.868
17.687	16.843
29.414	17.018
19.99	17.541
18.533	16.944
22.964	16.125
19.321	17.986
17.725	16.922
20.193	17.731
19.21	16.618
17.994	17.663
16.213	18.558
22.824	17.937
17.237	17.425
17.006	16.606
18.294	17.952
24.964	16.166
16.74	17.282
17.803	16.893
20.799	16.22
17.968	15.586
16.67	16.058
16.366	16.608
21.01	16.148
19.331	15.98
16.309	15.16
19.887	16.688
19.944	15.51
17.987	15.357
21.259	15.718
15.351	16.728
16.097	15.714
15.37	15.587
16.448	16.09
22.431	15.758
15.181	15.837
16.83	17.056
16.02	15.973
20.32	16.117
19.581	15.532
16.12	16.415
16.149	15.335
15.195	15.978
21.72	16.59
16.532	15.978
16.761	16.806
17.539	16.309
21.711	16.836
17.843	15.948
16.232	18.094
20.075	17.292
17.442	15.164
16.929	15.816
16.99	15.915
21.032	15.284
16.069	16.523
16.382	16.089
19.47	15.807
18.568	16.496
15.366	15.871
16.699	16.493
20.68	15.723
18.87	15.991
20.642	16.452
19.385	16.053
18.99	16.48
16.494	15.899
15.006	15.605
20.791	16.567
16.63	15.253
15.701	15.497
15.892	15.348
17.753	16.362
24.204	16.105
17.138	15.655
15.726	16.795
20.099	19.879
16.719	15.963
17.342	15.897
15.026	17.088
21.149	15.063
15.224	16.591
15.43	15.995
17.861	15.554
19.5	16.453
16.002	14.28
15.008	15.041
18.481	14.095
16.981	16.396
15.373	17.808
14.326	15.061
15.163	15.654
17.781	14.624
18.925	16
15.545	15.707
14.882	15.445
30.587	14.919
22.423	14.028
16.74	14.092
15.485	15.138
14.581	15.896
23.143	16.634
16.028	16.417
14.781	16.511
16.339	16.767
20.79	15.009
16.305	16.878
16.233	15.999
19.701	15.177
20.182	16.932
18.762	15.989
16.72	15.33
15.121	15.903
23.265	15.912
15.268	16.34
15.34	16.391
19.769	15.59
18.954	15.657
15.083	15.962
16.101	15.656
22.363	15.221
19.331	16.593
17.204	16.409
16.951	15.082
21.932	16.096
16.938	15.966
16.428	15.585
20.301	16.056
16.406	15.296
16.499	16.692
15.339	15.744
24.096	15.579
19.104	15.66
16.339	16.159
21.358	15.051
16.195	16.728
16.144	15.377
15.944	15.603
22.368	15.95
14.628	15.439
14.629	14.466
19.868	15.199
17.542	16.719
15.829	14.262
16.458	14.375
27.732	14.745
15.553	15.749
14.751	14.328
15.359	15.984
15.253	14.505
21.257	15.929
15.676	14.505
14.473	14.715
15.121	15.672
15.415	14.038
22.465	18.755
15.251	19.332
15.318	15.418
14.89	15.327
19.156	14.912
16.894	15.766
15.337	14.304
15.395	15.325
15.16	15.074
18.056	14.229
16.173	15.909
16.684	14.917
14.092	15.714
19.396	15.552
18.126	16.984
14.147	13.616
14.354	14.817
19.598	14.566
15.467	15.418
14.721	14.746
14.82	14.982
18.057	14.325
17.18	14.084
15.909	13.459
16.451	14.628
25.789	14.02
21.643	13.563
16.076	14.21
20.452	14.744
16.202	15.397
16.352	14.542
16.947	13.569
21.68	14.316
16.676	13.494
15.53	14.228
17.403	14.134
17.04	14.324
15.172	15.297
14.11	14.598
15.241	14.551
19.917	14.329
14.743	14.494
14.754	14.566
14.386	14.078
22.522	14.589
15.937	14.626
14.887	14.276
18.303	14.679
17.995	15.411
15.303	17.328
16.54	14.645
21.762	15.452
18.826	16.327
15.933	15
15.293	15.982
15.858	14.405
20.654	14.988
16.576	15.523
15.61	15.432
14.612	15.898
14.462	14.889
21.211	15.508
16.722	14.998
16.464	15.978
15.103	14.571
15.766	15.724
21.616	14.227
16.939	14.737
14.526	14.205
14.79	15.691
17.472	15.228
24.141	16.209
15.888	15.946
15.846	14.125
28.518	14.817
19.8	15.662
16.796	14.894
22.254	14.876
18.976	14.073
19.675	15.2
24.248	14.168
15.593	15.562
16.682	15.448
15.069	14.049
25.435	15.027
14.715	15.662
25.601	14.562
29.272	16.734
15.457	15.488
15.249	15.065
20.465	15.566
16.957	15.61
15.426	15.746
15.383	15.939
21.233	15.195
15.928	15.17
18.468	15.538
20.079	16.003
16.157	15.353
15.803	16.25
19.035	15.406
20.43	15.521
16.068	16.365
15.165	15.305
15.319	15.873
20.611	15.692
16.221	15.48
15.091	14.368
16.236	15.821
22.466	15.275
16.489	15.416
15.604	16.997
15.574	16.244
18.164	16.954
17.372	15.24
15.363	15.139
15.621	16.343
15.831	15.271
19.332	15.853
16.281	15.668
15.811	15.915
15.835	15.064
16.044	14.68
24.715	14.07
20.384	15.766
17.989	15.937
16.377	17.931
22.071	15.541
18.041	16.69
15.833	14.14
14.929	15.058
24.83	14.789
16.144	14.383
16.544	15.267
24.183	15.528
16.651	15.068
16.869	14.957
15.514	14.095
26.004	15.29
16.808	17.709
16.139	15.928
20.509	15.804
17.123	16.478
15.236	15.478
17.299	16.653
23.455	15.233
15.959	15.333
15.414	15.763
20.678	15.864
18.389	15.024
15.096	15.505
16.325	15.189
19.66	16.045
15.617	16.624
16.094	15.371
15.945	15.353
21.041	15.282
18.597	15.022
16.313	14.167
25.181	15.205
15.153	15.456
16.811	15.362
19.658	15.918
23.108	15.641
15.989	15.58
15.607	15.981
20.24	15.767
16.228	16.09
15.076	15.788
16.374	15.458
15.387	16.29
23.186	15.321
16.619	15.554
16.821	15.581
15.282	15.293
20.778	15.505
18.623	15.464
15.695	15.881
16.281	16.433
15.923	15.064
21.791	17.643
17.642	16.479
15.759	15.407
16.646	15.47
14.451	15.303
21.012	15.307
16.429	15.621
15.449	15.769
19.623	15.115
16.993	16.898
17.868	16.491
16.092	16.388
20.247	16.322
30.199	17.776
17.223	17.863
22.763	16.652
19.514	16.76
20.153	16.142
17.118	17.149
22.508	16.611
16.069	16.298
18.31	19.294
24.479	16.812
18.472	16.846
16.029	16.081
22.665	16.261
18.423	17.432
16.986	16.954
16.114	16.011
23.033	16.634
16.945	16.403
17.229	16.715
21.205	15.147
19.301	16.967
17.479	16.887
17.528	16.207
21.722	16.869
16.798	16.049
17.338	17.323
21.533	16.247
16.804	16.943
17.272	15.224
22.042	16.159
17.229	16.693
17.448	16.288
16.43	15.755
20.428	16.338
17	15.089
15.997	15.449
16.696	15.919
15.965	15.54
20.764	15.989
16.398	15.695
15.926	16.753
15.277	15.826
14.243	15.202
22.712	15.083
17.286	15.204
16.286	15.345
15.443	15.988
19.757	16.732
16.328	15.419
16.213	15.139
15.18	16.121
18.819	16.105
16.144	15.404
16.2	16.877
15.506	16.465
15.938	15.052
21.294	15.646
16.131	15.442
15.818	16.687
15.033	14.396
22.183	15.743
16.337	15.144
15.719	15.689
18.575	15.642
16.82	15.005
16.254	16.931
15.992	15.244
18.826	16.805
17.225	15.594
16.611	14.037
17.131	15.234
22.755	15.838
16.743	15.593
15.858	15.028
15.749	16.992
20.001	15.004
15.367	15.958
15.994	15.364
16.99	16.038
21.977	15.417
16.146	16.863
17.846	15.13
20.642	15.895
16.518	16.876
16.906	16.01
15.122	15.803
22.837	15.66
16.547	15.906
15.982	15.022
21.03	16.945
15.736	15.726
16.598	17.936
16.404	15.46
19.56	16.16
17.245	15.081
15.354	15.329
15.944	16.24
16.7	16.312
19.872	15.961
16.722	15.499
15.819	15.726
15.283	16.493
15.019	15.993
21.139	15.058
16.007	16.165
16.602	17.614
16.318	17.141
19.477	15.515
18.917	15.343
15.988	16.14
16.538	15.186
19.834	16.611
16.811	15.27
15.948	16.834
16.202	16.349
25.612	16.34
16.257	16.049
16.902	16.335
20.311	16.287
18.691	16.398
17.589	16.758
17.731	16.717
21.425	16.866
16.661	16.188
15.064	16.071
15.032	15.425
20.201	15.214
16.171	15.379
15.379	15.777
20.45	15.863
16.212	16.584
16.258	16.952
15.807	16.558
19.072	16.043
16.2	15.178
15.46	15.091
15.124	16.071
21.206	15.604
16.37	15.696
15.781	15.665
15.811	15.128
22.072	15.755
19.464	15.991
15.737	16.196
20.67	15.244
15.886	16.057
15.854	15.278
15.905	15.9
21.855	16.395
15.07	14.977
15.705	15.794
14.714	14.884
15.956	14.803
21.869	14.864
16.807	13.573
13.928	14.042
14.85	14.261
13.792	14.097
20.787	15.069
14.68	16.271
14.193	16.09
15.513	13.788
14.899	14.211
21.683	14.182
14.198	14.683
14.716	14.105
15.79	14.659
17.893	14.852
19.139	14.061
15.132	13.767
14.483	14.251
14.357	16.283
18.319	19.057
15.677	13.866
15.255	14.177
14.923	15.414
14.494	14.323
20.054	15.276
14.565	15.981
15.344	14.897
14.499	14.7
24.823	13.345
15.05	14.704
13.437	14.527
17.364	14.408
16.139	15.471
14.184	15.916
14.991	14.975
17.984	14.191
17.862	13.371
14.967	14.383
14.985	14.182
14.558	13.35
23.791	14.623
14.705	14.122
13.158	14.654
14.415	14.913
19.483	13.265
14.801	14.733
14.626	14.654
13.11	13.511
19.45	14.37
14.06	15.963
14.763	14.367
16.301	14.523
17.633	14.348
15.741	14.699
14.726	13.576
15.977	13.149
18.862	13.834
13.522	13.837
13.983	13.362
18.535	13.438
14.445	13.253
14.794	14.872
14.699	14.62
13.546	14.542
14.8	13.399
17.726	13.379
14.578	13.185
13.245	13.172
15.521	14.249
14.147	14.484
19.914	13.046
16.659	13.585
14.108	14.704
14.741	14.439
14.927	13.328
17.138	14.254
15.577	14.732
14.911	14.503
14.504	13.877
14.18	14.134
19.255	14.725
16.401	13.109
13.743	13.995
15.756	14.362
20.983	14.751
14.122	13.219
14.231	14.161
14.806	14.869
19.334	13.173
14.166	13.235
14.934	14.609
13.616	16.483
19.139	14.336
14.178	14.567
14.9	14.633
15.794	13.463
19.106	14.871
15.526	13.584
13.737	14.141
13.392	13.536
17.436	14.126
15.586	13.093
14.231	14.793
14.734	13.799
15.241	14.845
20.052	14.866
14.435	14.453
14.357	16.478
14.927	14.772
21.207	15.356
14.779	14.577
14.27	14.886
13.044	13.991
19.49	13.52
15.925	14.648
14.939	14.635
14.326	14.516
19.608	13.729
14.269	14.406
13.738	14.357
13.528	14.599
13.48	15.967
19.331	13.559
16.196	14.621
14.343	14.924
17.457	14.333
15.434	14.533
14.279	13.678
13.893	13.559
14.712	13.699
13.222	13.195
17.828	13.741
14.097	12.599
12.178	13.258
13.57	14.051
13.698	14.944
18.369	13.016
16.033	15.341
13.512	15.086
13.748	14.291
13.147	13.106
14.654	13.686
18.363	14.79
14.095	14.508
13.674	13.245
13.824	13.113
13.184	14.333
18.738	14.027
15.934	14.463
14	14.809
16.911	14.098
15.364	15.518
21.558	15.756
15.897	14.636
15.663	14.147
15.262	15.508
20.881	14.684
15.077	15.002
14.897	14.634
15.716	14.897
20.204	14.397
16.928	14.733
15.36	14.515
18.73	14.17
16.169	15.172
15.65	17.599
14.617	14.653
16.363	14.495
20.107	13.152
14.13	14.36
15.204	14.908
18.99	14.774
16.401	14.127
15.523	14.814
15.92	14.816
18.584	14.42
17.355	13
14.135	14.973
14.346	15.985
17.761	15.927
16.27	14.68
14.224	15.291
14.493	14.251
18.189	14.443
15.21	14.139
15.628	14.797
13.822	14.965
17.376	14.398
18.904	14.458
15.554	14.038
17.67	14.339
14.396	13.694
15.848	13.334
13.215	15.318
14.984	13.061
13.37	14.066
20.721	13.2
16.948	14.432
13.458	13.648
13.435	13.082
13.704	13.875
19.686	14.849
15.819	13.152
13.624	13.701
14.277	13.243
14.985	13.604
18.752	13.097
15.659	14.725
13.619	13.095
13.095	15.082
14.05	16.882
18.561	14.676
16.837	13.288
14.026	15.061
13.305	13.394
15.245	16.946
19.909	14.42
17.218	14.434
13.604	13.425
15.803	14.253
18.78	14.493
15.175	14.495
14.166	14.303
13.992	14.186
15.481	14.797
21.04	14.038
14.239	14.406
15.215	14.361
14.165	13.107
19.716	14.557
14.692	14.535
14.035	13.48
14.56	13.794
21.408	14.856
14.595	14.595
13.991	13.707
14.01	14.316
18.243	15.699
15.136	14.347
13.599	14.31
14.929	14.27
22.787	13.18
15.839	15.175
15.65	14.087
14.946	15.415
21.477	14.885
15.519	14.776
15.727	15.662
17.802	14.414
16.816	14.493
15.024	14.585
15.725	15.945
19.735	16.386
16.069	15.126
14.315	14.237
22.892	15.513
21.926	14.896
15.579	15.718
14.409	14.993
15.673	14.186
19.994	14.435
16.751	15.638
15.142	14.352
15.072	15.471
15.418	15.313
17.77	15.415
20.292	14.011
16.913	15.137
16.726	15.585
15.437	16.42
18.269	15.784
17.007	16.531
14.272	15.465
15.515	15.033
15.417	14.959
20.816	15.127
15.695	14.987
15.2	15.912
15.238	15.615
15.11	14.676
20.525	15.05
16.41	15.387
15.579	14.595
14.333	15.941
20.973	14.455
15.232	15.142
15.49	15.271
20.726	15.268
17.507	15.237
14.09	15.12
15.263	14.179
22.011	15.507
16.056	15.295
16.514	15.902
18.735	16.174
19.655	17.12
15.001	16.278
15.293	14.398
19.63	16.885
16.433	15.243
15.582	15.727
15.279	16.287
21.241	15.658
18.09	18.519
16.777	15.813
20.337	15.806
17.925	15.575
15.076	15.607
15.431	16.183
20.722	16.534
16.722	15.104
16.725	15.585
18.974	15.456
19.132	16.334
15.184	15.813
17.199	16.667
20.542	15.111
16.721	15.45
15.065	15.71
16.876	16.227
16.124	15.371
21.912	16.719
15.172	16.168
15.762	15.659
15.531	16.93
20.272	15.616
16.511	16.912
18.928	15.867
17.347	16.141
16.111	15.744
21.35	16.966
15.21	15.559
16.855	16.843
15.913	15.467
21.315	18.062
17.471	17.237
15.726	16.955
15.631	15.626
21.068	15.673
16.078	17.083
16.029	15.986
15.946	14.607
21.553	15.013
15.008	15.093
14.918	14.575
19.823	16.926
19.463	14.823
15.759	15.647
[truncated: 880 more rows]
