# Supplementary material for: Improved GNSS integer ambiguity resolution method based on the column oriented Cholesky decomposition
Source: Research Square preprint supplement (doi:10.21203/rs.3.rs-2360038/v1), 2022-12-20
Supplement: Supplementary file 17 [file Short baseline solution time.xlsx]

## Sheet: Sheet1
15000	17000
16000	15000
16000	16000
16000	16000
16000	16000
16000	16000
17000	16000
16000	16000
16000	16000
16000	16000
16000	16000
16000	16000
18000	17000
17000	15000
16000	16000
16000	16000
16000	16000
15000	16000
16000	16000
17000	16000
16000	16000
16000	16000
16000	16000
17000	16000
16000	17000
17000	15000
15000	16000
16000	16000
16000	15000
15000	17000
16000	15000
16000	16000
17000	16000
17000	16000
17000	17000
15000	15000
16000	16000
17000	16000
16000	16000
15000	16000
17000	15000
16000	16000
18000	16000
15000	15000
16000	16000
16000	15000
16000	15000
15000	16000
16000	16000
16000	16000
16000	16000
16000	16000
16000	16000
16000	15000
16000	16000
15000	15000
16000	16000
16000	16000
16000	15000
16000	16000
17000	17000
15000	15000
17000	16000
17000	16000
16000	16000
16000	16000
16000	15000
16000	16000
15000	15000
16000	16000
16000	16000
16000	15000
16000	16000
15000	15000
16000	16000
19000	16000
16000	18000
15000	15000
18000	16000
16000	15000
16000	16000
16000	16000
16000	16000
15000	15000
16000	17000
16000	15000
17000	16000
17000	16000
18000	15000
17000	17000
16000	15000
16000	16000
16000	16000
16000	16000
15000	15000
16000	16000
16000	16000
15000	15000
16000	16000
16000	16000
17000	15000
17000	16000
17000	16000
16000	16000
16000	16000
15000	15000
17000	16000
15000	16000
16000	16000
17000	16000
15000	15000
16000	16000
17000	16000
17000	15000
16000	15000
17000	17000
16000	15000
16000	16000
16000	16000
16000	16000
16000	15000
16000	16000
16000	16000
15000	15000
18000	16000
17000	16000
17000	15000
17000	17000
15000	16000
16000	16000
16000	15000
17000	16000
16000	16000
15000	15000
17000	16000
16000	16000
16000	16000
17000	16000
17000	16000
16000	15000
15000	16000
16000	16000
16000	16000
17000	15000
16000	15000
16000	16000
16000	16000
17000	15000
15000	16000
17000	15000
17000	16000
16000	16000
17000	16000
17000	16000
16000	16000
16000	15000
16000	16000
16000	15000
16000	16000
16000	15000
15000	16000
17000	16000
17000	15000
17000	15000
16000	16000
16000	16000
16000	16000
16000	16000
16000	16000
17000	17000
15000	15000
16000	16000
16000	15000
16000	16000
16000	15000
16000	16000
17000	16000
16000	15000
16000	16000
16000	16000
15000	17000
16000	17000
17000	16000
17000	16000
16000	16000
16000	16000
15000	15000
16000	16000
18000	16000
16000	16000
16000	16000
16000	16000
16000	16000
16000	16000
16000	15000
15000	16000
16000	16000
18000	16000
15000	15000
17000	16000
19000	16000
16000	16000
16000	15000
16000	16000
16000	16000
16000	16000
16000	16000
15000	16000
16000	16000
16000	16000
17000	15000
16000	16000
16000	15000
17000	17000
16000	16000
16000	16000
16000	16000
16000	16000
16000	16000
17000	17000
15000	15000
17000	15000
16000	16000
16000	16000
17000	15000
17000	16000
16000	16000
17000	16000
17000	16000
16000	15000
16000	16000
15000	15000
16000	16000
16000	16000
16000	15000
16000	16000
16000	16000
16000	15000
16000	16000
16000	16000
16000	15000
16000	16000
16000	15000
16000	16000
15000	16000
16000	16000
15000	15000
16000	16000
16000	15000
16000	17000
16000	15000
17000	16000
16000	15000
16000	15000
15000	16000
17000	15000
15000	16000
16000	16000
15000	17000
17000	15000
16000	16000
16000	16000
16000	16000
16000	16000
17000	16000
16000	16000
15000	16000
16000	16000
15000	16000
16000	17000
16000	16000
16000	15000
17000	16000
16000	16000
16000	16000
15000	15000
17000	16000
18000	15000
19000	16000
16000	16000
16000	16000
15000	15000
16000	16000
16000	16000
16000	16000
15000	15000
18000	16000
16000	15000
16000	16000
17000	15000
17000	16000
17000	16000
15000	16000
17000	16000
16000	16000
16000	16000
16000	16000
16000	15000
15000	16000
16000	16000
16000	16000
16000	16000
16000	16000
17000	16000
16000	16000
16000	16000
16000	16000
16000	16000
16000	17000
16000	16000
15000	16000
16000	15000
15000	16000
16000	16000
17000	16000
16000	16000
16000	16000
16000	16000
16000	15000
15000	16000
16000	17000
16000	15000
17000	16000
16000	16000
16000	15000
17000	16000
16000	16000
17000	16000
16000	16000
15000	16000
16000	16000
16000	15000
17000	16000
16000	17000
16000	15000
16000	16000
15000	16000
16000	16000
16000	15000
16000	16000
17000	15000
16000	16000
16000	16000
15000	16000
16000	16000
16000	16000
16000	17000
15000	15000
16000	16000
16000	16000
16000	16000
16000	16000
16000	15000
16000	16000
16000	16000
17000	15000
15000	17000
16000	15000
16000	16000
16000	17000
16000	17000
16000	16000
16000	16000
15000	17000
16000	16000
18000	16000
18000	16000
17000	15000
16000	16000
16000	16000
16000	15000
18000	17000
16000	15000
16000	16000
16000	15000
17000	16000
16000	16000
18000	16000
17000	15000
16000	16000
16000	15000
16000	16000
17000	15000
16000	17000
16000	16000
15000	16000
17000	16000
16000	15000
16000	16000
16000	16000
18000	15000
18000	16000
17000	16000
15000	15000
17000	16000
18000	15000
16000	16000
16000	16000
16000	16000
16000	16000
16000	15000
16000	16000
17000	15000
17000	16000
16000	16000
16000	15000
17000	16000
16000	15000
16000	16000
17000	16000
16000	16000
16000	15000
16000	16000
17000	15000
17000	16000
17000	15000
15000	16000
15000	15000
16000	16000
16000	16000
16000	15000
16000	16000
16000	16000
16000	16000
16000	16000
16000	16000
16000	16000
18000	16000
16000	16000
15000	16000
17000	16000
15000	16000
16000	16000
16000	16000
15000	16000
16000	15000
16000	17000
16000	16000
16000	15000
17000	16000
17000	15000
17000	16000
15000	16000
17000	15000
16000	16000
15000	16000
16000	15000
17000	16000
16000	16000
16000	16000
16000	17000
18000	15000
17000	16000
17000	16000
16000	16000
17000	16000
15000	15000
17000	16000
16000	16000
15000	15000
17000	16000
16000	15000
15000	18000
16000	16000
16000	16000
17000	15000
16000	17000
16000	16000
16000	16000
17000	16000
16000	16000
16000	16000
16000	16000
16000	15000
17000	16000
16000	16000
16000	15000
17000	16000
16000	15000
16000	16000
16000	16000
16000	16000
16000	15000
16000	15000
15000	16000
16000	16000
16000	15000
16000	16000
16000	16000
17000	15000
16000	16000
16000	16000
16000	15000
15000	16000
16000	16000
16000	16000
16000	16000
16000	16000
16000	16000
15000	16000
16000	16000
16000	16000
17000	15000
16000	16000
17000	16000
16000	16000
17000	15000
15000	16000
16000	16000
16000	16000
16000	16000
16000	15000
15000	16000
16000	16000
16000	16000
17000	16000
16000	15000
16000	16000
16000	15000
17000	17000
15000	16000
16000	15000
16000	15000
16000	16000
17000	15000
15000	16000
16000	17000
16000	16000
17000	16000
16000	15000
16000	16000
16000	16000
15000	16000
16000	16000
17000	15000
15000	16000
17000	16000
16000	16000
16000	15000
16000	17000
17000	16000
18000	16000
16000	15000
15000	15000
16000	16000
17000	16000
15000	16000
16000	15000
16000	16000
16000	16000
15000	16000
16000	16000
16000	15000
16000	16000
18000	16000
16000	15000
16000	16000
16000	16000
15000	16000
16000	15000
16000	16000
17000	16000
16000	15000
16000	16000
15000	17000
17000	15000
16000	16000
17000	16000
16000	16000
16000	15000
16000	16000
16000	16000
16000	15000
17000	15000
16000	16000
16000	15000
16000	17000
15000	16000
17000	17000
16000	16000
16000	15000
15000	16000
16000	15000
15000	16000
16000	15000
16000	16000
15000	16000
17000	16000
15000	16000
16000	17000
16000	16000
17000	16000
15000	15000
16000	16000
17000	17000
16000	16000
16000	15000
17000	16000
15000	16000
17000	16000
17000	16000
16000	15000
16000	16000
17000	17000
17000	15000
17000	16000
16000	16000
16000	16000
16000	15000
16000	16000
15000	15000
15000	16000
16000	16000
16000	16000
16000	16000
16000	15000
18000	16000
16000	16000
17000	15000
16000	16000
16000	16000
16000	15000
16000	16000
16000	16000
17000	15000
16000	16000
17000	15000
19000	16000
18000	16000
18000	16000
16000	16000
16000	16000
16000	15000
16000	16000
16000	16000
16000	15000
15000	16000
17000	15000
16000	15000
17000	15000
17000	16000
18000	16000
17000	15000
17000	17000
17000	16000
15000	17000
16000	16000
16000	16000
17000	15000
15000	16000
16000	16000
17000	15000
16000	16000
17000	15000
17000	17000
16000	16000
16000	16000
16000	15000
16000	16000
16000	16000
16000	16000
16000	16000
16000	15000
16000	16000
16000	16000
16000	15000
17000	16000
17000	16000
16000	15000
16000	16000
15000	15000
16000	16000
16000	16000
16000	15000
16000	15000
15000	15000
16000	16000
17000	16000
17000	15000
16000	16000
16000	17000
17000	16000
16000	16000
16000	16000
16000	16000
15000	16000
16000	15000
16000	16000
16000	16000
16000	16000
16000	16000
16000	15000
16000	16000
16000	17000
15000	16000
16000	15000
15000	16000
16000	16000
16000	16000
17000	16000
16000	16000
16000	15000
15000	16000
16000	16000
18000	16000
16000	15000
16000	17000
15000	15000
17000	16000
15000	16000
16000	16000
16000	16000
15000	16000
16000	16000
16000	16000
16000	15000
17000	15000
17000	16000
16000	15000
16000	18000
15000	17000
16000	15000
17000	16000
16000	16000
16000	15000
16000	16000
15000	15000
16000	16000
16000	16000
17000	16000
16000	16000
16000	16000
16000	17000
16000	16000
16000	16000
16000	16000
16000	15000
16000	16000
16000	15000
15000	16000
16000	16000
16000	15000
16000	16000
17000	15000
16000	16000
16000	17000
16000	15000
16000	15000
17000	16000
16000	16000
16000	15000
15000	16000
17000	16000
16000	15000
17000	16000
15000	16000
15000	16000
16000	16000
16000	17000
16000	16000
15000	15000
16000	16000
17000	15000
16000	16000
16000	16000
15000	16000
16000	15000
18000	16000
16000	16000
15000	15000
16000	16000
16000	16000
16000	16000
16000	16000
15000	17000
16000	16000
17000	15000
15000	16000
16000	16000
16000	15000
16000	16000
17000	15000
16000	16000
15000	16000
16000	17000
16000	16000
16000	15000
16000	16000
16000	16000
15000	15000
16000	16000
16000	16000
16000	15000
16000	16000
16000	16000
15000	16000
16000	16000
16000	16000
16000	16000
16000	15000
15000	16000
16000	15000
16000	17000
17000	15000
16000	16000
17000	15000
16000	15000
17000	15000
16000	16000
16000	16000
17000	18000
16000	16000
15000	15000
16000	16000
16000	17000
16000	15000
16000	16000
16000	15000
16000	16000
17000	16000
17000	15000
15000	16000
17000	16000
16000	17000
16000	16000
16000	15000
16000	16000
16000	16000
16000	15000
16000	16000
17000	15000
17000	15000
17000	15000
17000	16000
16000	16000
16000	16000
16000	16000
16000	15000
16000	16000
15000	16000
17000	15000
16000	16000
16000	15000
16000	16000
16000	16000
15000	15000
17000	16000
15000	15000
16000	17000
17000	16000
15000	15000
16000	15000
16000	16000
15000	15000
16000	16000
16000	16000
17000	16000
17000	16000
16000	15000
16000	16000
16000	16000
16000	16000
16000	16000
16000	15000
16000	16000
16000	16000
17000	16000
17000	16000
17000	15000
16000	16000
17000	16000
16000	16000
17000	16000
16000	16000
16000	16000
18000	16000
17000	16000
16000	16000
17000	16000
17000	15000
17000	16000
17000	16000
17000	16000
16000	15000
17000	17000
16000	15000
16000	17000
16000	16000
16000	15000
16000	16000
18000	15000
17000	16000
19000	16000
17000	15000
18000	16000
17000	15000
16000	16000
16000	16000
16000	15000
17000	16000
17000	17000
16000	16000
16000	16000
16000	15000
17000	16000
18000	15000
16000	15000
17000	16000
16000	16000
16000	16000
15000	16000
16000	16000
16000	15000
16000	16000
15000	17000
16000	16000
17000	16000
16000	16000
16000	15000
17000	16000
16000	16000
16000	16000
16000	16000
16000	15000
16000	16000
16000	16000
16000	15000
15000	15000
16000	16000
16000	16000
17000	15000
16000	16000
16000	15000
17000	16000
16000	16000
16000	16000
16000	15000
16000	16000
16000	16000
16000	16000
16000	17000
17000	16000
16000	15000
16000	16000
16000	16000
16000	16000
16000	16000
15000	16000
16000	16000
15000	15000
16000	17000
16000	16000
18000	16000
16000	16000
16000	15000
16000	17000
16000	15000
16000	16000
16000	16000
15000	15000
16000	16000
17000	16000
16000	15000
17000	16000
16000	17000
15000	16000
16000	15000
16000	16000
17000	16000
16000	16000
16000	15000
15000	16000
16000	16000
16000	16000
17000	16000
17000	15000
16000	16000
16000	17000
16000	16000
17000	15000
19000	16000
17000	15000
16000	16000
16000	16000
16000	16000
17000	16000
15000	16000
16000	15000
17000	17000
15000	17000
16000	17000
16000	16000
18000	16000
18000	16000
17000	15000
17000	16000
16000	16000
16000	15000
16000	16000
16000	15000
16000	16000
15000	16000
16000	16000
15000	16000
16000	16000
17000	15000
16000	16000
16000	15000
16000	16000
16000	16000
16000	16000
16000	16000
17000	15000
17000	16000
16000	16000
16000	16000
16000	15000
17000	16000
17000	15000
16000	16000
16000	15000
16000	16000
16000	16000
16000	16000
16000	15000
15000	16000
17000	15000
16000	16000
17000	16000
16000	16000
17000	17000
15000	15000
17000	16000
16000	16000
16000	15000
15000	16000
17000	15000
16000	16000
15000	16000
17000	17000
15000	15000
16000	15000
16000	17000
17000	16000
17000	16000
16000	16000
16000	16000
16000	16000
16000	15000
16000	16000
16000	15000
16000	16000
15000	15000
16000	16000
18000	15000
18000	17000
16000	15000
16000	16000
16000	16000
16000	15000
16000	16000
16000	16000
16000	15000
16000	16000
16000	16000
16000	16000
15000	16000
16000	16000
19000	16000
16000	16000
17000	16000
17000	16000
16000	16000
15000	16000
16000	16000
17000	16000
16000	15000
15000	16000
16000	16000
16000	16000
17000	16000
18000	17000
16000	16000
15000	16000
16000	16000
16000	15000
16000	16000
16000	16000
16000	16000
15000	15000
16000	16000
16000	15000
16000	16000
17000	16000
16000	16000
16000	16000
15000	17000
16000	15000
16000	16000
16000	16000
16000	15000
17000	15000
16000	16000
16000	16000
16000	15000
17000	16000
16000	17000
17000	16000
16000	15000
16000	16000
16000	16000
16000	16000
16000	15000
17000	16000
16000	16000
16000	15000
16000	15000
18000	15000
18000	15000
17000	17000
16000	16000
16000	16000
17000	16000
16000	16000
16000	17000
16000	15000
17000	16000
16000	16000
17000	15000
16000	16000
18000	15000
17000	16000
16000	16000
16000	16000
16000	15000
17000	16000
16000	16000
16000	15000
16000	16000
16000	16000
16000	16000
18000	16000
18000	16000
17000	15000
16000	16000
16000	16000
16000	16000
16000	15000
16000	16000
16000	16000
16000	15000
16000	16000
16000	16000
16000	16000
16000	16000
18000	16000
18000	15000
16000	16000
16000	16000
16000	16000
15000	16000
16000	16000
16000	16000
16000	16000
16000	16000
16000	17000
17000	15000
16000	16000
17000	16000
15000	15000
16000	17000
16000	16000
16000	15000
16000	16000
15000	16000
17000	16000
15000	15000
16000	16000
16000	15000
17000	16000
17000	16000
16000	15000
15000	16000
16000	16000
16000	16000
16000	17000
17000	16000
17000	16000
17000	16000
16000	16000
16000	17000
18000	15000
16000	15000
17000	16000
16000	16000
16000	16000
16000	16000
16000	16000
18000	16000
16000	15000
15000	16000
16000	15000
15000	16000
17000	16000
16000	15000
16000	16000
16000	15000
17000	16000
16000	16000
16000	15000
16000	16000
17000	15000
15000	16000
17000	16000
15000	16000
17000	15000
17000	16000
16000	16000
17000	16000
16000	15000
16000	16000
16000	16000
17000	16000
16000	16000
16000	16000
16000	15000
16000	16000
16000	16000
15000	16000
17000	16000
16000	15000
17000	16000
16000	15000
15000	16000
16000	16000
16000	16000
15000	16000
16000	15000
16000	16000
15000	16000
16000	15000
16000	15000
17000	16000
22000	16000
17000	16000
15000	16000
16000	15000
16000	16000
16000	17000
16000	16000
16000	16000
16000	16000
16000	16000
15000	15000
16000	16000
18000	15000
16000	16000
16000	15000
16000	16000
15000	15000
17000	18000
16000	17000
16000	17000
16000	16000
16000	16000
16000	15000
16000	16000
16000	16000
16000	16000
18000	16000
17000	15000
16000	16000
15000	16000
17000	16000
16000	16000
16000	16000
16000	16000
16000	16000
17000	16000
16000	15000
17000	16000
16000	15000
16000	17000
16000	16000
16000	16000
16000	15000
15000	16000
17000	18000
16000	17000
16000	16000
15000	16000
17000	15000
16000	16000
18000	16000
16000	15000
16000	16000
16000	17000
16000	15000
16000	17000
16000	16000
16000	17000
16000	15000
17000	16000
15000	16000
17000	15000
17000	16000
16000	16000
16000	15000
16000	16000
17000	16000
16000	16000
16000	16000
16000	16000
15000	16000
15000	15000
16000	16000
16000	16000
17000	16000
16000	15000
17000	16000
16000	16000
16000	16000
18000	17000
17000	15000
16000	17000
15000	16000
17000	16000
16000	16000
16000	16000
17000	16000
18000	16000
18000	16000
23000	15000
17000	16000
16000	17000
16000	16000
16000	15000
16000	16000
16000	17000
17000	16000
15000	15000
16000	16000
17000	15000
18000	16000
17000	15000
18000	16000
15000	16000
16000	16000
16000	15000
16000	16000
16000	17000
16000	17000
16000	16000
17000	17000
15000	16000
18000	15000
16000	16000
19000	16000
16000	16000
17000	15000
16000	16000
18000	15000
16000	16000
17000	16000
17000	16000
16000	17000
16000	16000
18000	16000
17000	15000
17000	16000
16000	17000
17000	15000
17000	16000
16000	17000
17000	15000
17000	17000
17000	16000
17000	17000
16000	16000
17000	16000
16000	16000
18000	16000
16000	16000
17000	15000
17000	16000
16000	16000
15000	15000
17000	16000
16000	16000
16000	16000
16000	16000
18000	15000
19000	16000
19000	16000
16000	16000
16000	16000
17000	16000
16000	16000
16000	16000
17000	16000
16000	16000
16000	16000
16000	16000
16000	16000
16000	17000
17000	16000
16000	16000
16000	16000
16000	15000
16000	16000
15000	16000
16000	16000
16000	15000
16000	15000
16000	17000
16000	16000
17000	15000
19000	16000
20000	16000
16000	16000
15000	15000
16000	15000
16000	16000
16000	16000
16000	15000
16000	15000
16000	17000
16000	16000
16000	15000
16000	16000
17000	15000
17000	16000
16000	16000
15000	16000
16000	15000
16000	16000
16000	16000
16000	16000
18000	16000
17000	16000
16000	17000
16000	14000
17000	15000
18000	17000
16000	15000
16000	16000
15000	16000
16000	16000
16000	16000
16000	16000
16000	15000
16000	17000
16000	17000
16000	16000
16000	16000
16000	16000
17000	17000
16000	16000
16000	16000
16000	15000
17000	16000
15000	16000
16000	16000
16000	16000
16000	16000
17000	17000
16000	16000
15000	16000
17000	16000
17000	16000
18000	16000
16000	16000
16000	16000
16000	15000
15000	16000
16000	16000
17000	16000
16000	16000
16000	19000
16000	16000
16000	15000
17000	17000
17000	16000
16000	16000
16000	16000
16000	16000
16000	16000
16000	16000
16000	15000
16000	16000
16000	16000
16000	16000
16000	16000
17000	16000
20000	16000
17000	16000
15000	16000
17000	15000
16000	17000
16000	15000
16000	16000
16000	15000
16000	16000
16000	17000
17000	15000
18000	16000
21000	16000
20000	16000
18000	15000
17000	16000
17000	16000
17000	16000
18000	16000
17000	16000
18000	15000
18000	16000
18000	16000
18000	16000
18000	16000
19000	16000
18000	16000
17000	16000
18000	15000
18000	16000
17000	15000
18000	16000
17000	16000
17000	16000
18000	16000
17000	17000
16000	20000
16000	16000
16000	16000
17000	16000
15000	15000
17000	17000
16000	16000
16000	15000
15000	16000
16000	16000
16000	16000
17000	17000
16000	16000
16000	16000
16000	15000
16000	16000
16000	16000
16000	15000
18000	16000
15000	16000
15000	16000
16000	16000
16000	16000
17000	16000
16000	16000
16000	16000
16000	16000
16000	16000
17000	16000
16000	16000
16000	16000
16000	16000
16000	15000
16000	16000
16000	16000
17000	15000
17000	16000
17000	17000
16000	16000
16000	16000
16000	15000
16000	16000
16000	15000
16000	16000
17000	16000
17000	15000
16000	17000
15000	15000
18000	16000
17000	17000
16000	17000
16000	16000
16000	16000
16000	15000
16000	16000
16000	15000
16000	16000
15000	16000
16000	15000
17000	15000
17000	16000
18000	16000
17000	17000
16000	16000
16000	16000
17000	16000
16000	16000
16000	17000
16000	16000
17000	15000
16000	16000
16000	16000
19000	16000
17000	15000
18000	17000
17000	16000
17000	16000
16000	16000
19000	15000
17000	16000
16000	16000
16000	16000
16000	15000
16000	16000
17000	15000
19000	16000
16000	16000
17000	16000
16000	17000
16000	16000
16000	15000
17000	16000
16000	17000
16000	16000
17000	17000
16000	16000
17000	16000
16000	15000
19000	17000
16000	16000
16000	16000
15000	16000
17000	16000
15000	16000
17000	16000
16000	16000
16000	16000
16000	16000
16000	16000
17000	16000
17000	16000
16000	16000
17000	16000
15000	18000
16000	16000
15000	15000
17000	16000
16000	16000
16000	16000
16000	15000
16000	16000
17000	16000
17000	16000
15000	15000
17000	17000
15000	15000
16000	17000
15000	16000
16000	16000
16000	16000
16000	15000
16000	16000
16000	16000
15000	16000
17000	17000
16000	15000
16000	16000
16000	16000
16000	16000
16000	16000
16000	16000
17000	16000
15000	16000
16000	16000
16000	16000
16000	16000
16000	16000
15000	16000
16000	16000
18000	15000
17000	16000
16000	16000
16000	16000
16000	17000
16000	15000
17000	16000
15000	16000
16000	16000
16000	16000
16000	16000
16000	15000
16000	16000
17000	16000
16000	17000
17000	16000
16000	16000
16000	16000
16000	16000
16000	17000
16000	16000
17000	16000
17000	16000
16000	15000
17000	16000
16000	15000
16000	17000
17000	15000
15000	16000
16000	13000
16000	16000
16000	16000
16000	16000
16000	16000
16000	16000
16000	16000
16000	15000
16000	16000
15000	16000
17000	16000
16000	16000
16000	16000
16000	16000
16000	16000
16000	16000
16000	15000
16000	16000
16000	16000
16000	16000
16000	16000
17000	16000
17000	15000
15000	16000
16000	16000
16000	17000
17000	15000
16000	16000
17000	16000
16000	16000
16000	16000
16000	16000
16000	16000
16000	17000
17000	16000
16000	16000
16000	15000
16000	16000
15000	16000
16000	17000
17000	16000
16000	15000
15000	16000
16000	16000
17000	16000
16000	16000
18000	15000
16000	15000
16000	16000
16000	16000
15000	16000
16000	16000
17000	16000
16000	15000
16000	16000
17000	16000
16000	16000
16000	16000
17000	16000
17000	17000
17000	15000
17000	16000
15000	17000
16000	16000
16000	16000
17000	16000
16000	15000
16000	16000
15000	16000
16000	16000
17000	16000
16000	16000
17000	16000
17000	16000
17000	16000
16000	16000
16000	17000
16000	16000
16000	15000
17000	15000
15000	16000
17000	16000
16000	16000
16000	16000
17000	16000
16000	16000
16000	15000
15000	17000
16000	16000
16000	17000
16000	17000
16000	15000
15000	16000
16000	16000
16000	16000
16000	16000
17000	16000
16000	16000
16000	16000
16000	15000
17000	16000
16000	18000
17000	15000
16000	16000
16000	16000
17000	17000
16000	15000
16000	16000
15000	16000
17000	16000
18000	16000
16000	15000
17000	16000
16000	16000
17000	16000
16000	16000
15000	16000
17000	15000
15000	16000
16000	16000
15000	16000
17000	15000
19000	16000
17000	16000
16000	15000
16000	16000
17000	16000
16000	17000
16000	16000
15000	16000
19000	15000
15000	16000
16000	16000
16000	16000
18000	15000
16000	16000
16000	16000
17000	15000
16000	16000
16000	17000
16000	16000
17000	16000
16000	16000
17000	16000
17000	16000
17000	16000
18000	15000
19000	16000
23000	16000
17000	16000
16000	16000
17000	17000
16000	16000
17000	16000
16000	16000
17000	15000
16000	16000
17000	16000
18000	16000
18000	15000
17000	16000
16000	16000
17000	16000
16000	15000
17000	16000
17000	16000
16000	16000
16000	16000
17000	16000
16000	16000
16000	16000
17000	16000
16000	16000
17000	16000
16000	15000
17000	16000
16000	16000
16000	16000
16000	20000
16000	16000
17000	16000
16000	16000
18000	16000
17000	16000
17000	15000
16000	15000
17000	17000
17000	16000
16000	15000
16000	16000
16000	18000
16000	17000
16000	16000
16000	16000
16000	15000
18000	16000
16000	15000
17000	16000
17000	16000
16000	16000
16000	16000
16000	16000
16000	16000
16000	17000
17000	16000
17000	15000
15000	16000
17000	16000
16000	15000
17000	16000
15000	16000
16000	15000
16000	16000
16000	16000
16000	17000
18000	16000
16000	16000
16000	16000
16000	16000
16000	15000
18000	16000
16000	16000
16000	15000
16000	16000
16000	17000
15000	15000
16000	17000
16000	15000
16000	16000
15000	16000
16000	16000
16000	16000
16000	16000
20000	15000
17000	16000
17000	16000
16000	16000
16000	15000
16000	16000
16000	16000
15000	16000
17000	16000
16000	15000
15000	16000
17000	15000
16000	16000
17000	16000
17000	16000
16000	16000
16000	16000
16000	16000
16000	16000
16000	16000
17000	17000
15000	16000
16000	17000
16000	16000
17000	15000
17000	16000
17000	16000
16000	16000
15000	16000
18000	16000
16000	16000
16000	16000
16000	17000
16000	16000
17000	17000
16000	16000
17000	16000
17000	16000
16000	16000
16000	16000
15000	15000
16000	16000
16000	16000
16000	16000
16000	15000
17000	16000
16000	17000
15000	16000
16000	16000
17000	15000
17000	16000
16000	15000
16000	17000
16000	16000
16000	16000
16000	15000
16000	17000
16000	15000
17000	16000
[truncated: 1,000 more rows]
